# Supplementary material for: The Human Extracellular Matrix Diseasome Reveals Genotype–Phenotype Associations with Clinical Implications for Age-Related Diseases
Source: Biomedicines. 2023 Apr 19;11(4):1212. doi: 10.3390/biomedicines11041212 (PMC10135578; doi:10.3390/biomedicines11041212)
Supplement: Supplementary file 1 [file biomedicines-11-01212-s001.zip]

Archive with 12 entries (12 files):
- biomedicines-2303489-figure S1.pdf
- Table_S10_ECM_drug_repurposing.csv
- Table_S11_Matrisome_rarediseases_data.csv
- Table_S1_PheWAS of GWAS Catalog of SNVs Data Table for Fig2.csv
- Table_S2_matrisomeProteinComplex_data_table.csv
- Table_S3_matrsiome-matrisome-interaction_ecm.csv
- Table_S4_HumanDisease_data.csv
- Table_S5_Clinical Variant Matrisome data table.csv
- Table_S6Monarch_diseases_data.xlsx
- Table_S7_UKBiobankTop1000_data.csv
- Table_S8_ECM diseasome.csv
- Table_S9_SNP and Matrisome Diseasome.xlsx
