# Supplementary material for: The Human Extracellular Matrix Diseasome Reveals Genotype–Phenotype Associations with Clinical Implications for Age-Related Diseases
Source: Biomedicines. 2023 Apr 19;11(4):1212. doi: 10.3390/biomedicines11041212 (PMC10135578; doi:10.3390/biomedicines11041212)
Supplement: Supplementary file 1 [file biomedicines-11-01212-s001.zip › Table_S1_PheWAS of GWAS Catalog of SNVs Data Table for Fig2.csv]

division	category	Gene Symbol	Gene Name	geneid	snp	chromosome	phewas phenotype	phewas code	gwas-associations	cases	odds-ratio	p-value
Core matrisome	Collagens	COL11A1	collagen, type XI, alpha 1	2186	rs10874639	1 103133909	Mammographic microcalcification	611.11	Fibrinogen	80	2.067	1.93e-4
Core matrisome	Collagens	COL11A1	collagen, type XI, alpha 1	2186	rs10874639	1 103133909	Malignant neoplasm of kidney and other urinary organs	189.4	Fibrinogen	58	2.147	5.749e-4
Core matrisome	Collagens	COL11A1	collagen, type XI, alpha 1	2186	rs10874639	1 103133909	pulmonary heart disease	415	Fibrinogen	772	1.29	8.434e-4
Core matrisome	Collagens	COL11A1	collagen, type XI, alpha 1	2186	rs10874639	1 103133909	Cardiac complications, not elsewhere classified	429.9	Fibrinogen	153	1.651	9.725e-4
Core matrisome	Collagens	COL11A1	collagen, type XI, alpha 1	2186	rs10874639	1 103133909	Nonrheumatic mitral valve disorders	395.1	Fibrinogen	949	0.766	0.001304
Core matrisome	Collagens	COL11A1	collagen, type XI, alpha 1	2186	rs10874639	1 103133909	Benign neoplasm of breast	610.4	Fibrinogen	78	1.952	0.001373
Core matrisome	Collagens	COL11A1	collagen, type XI, alpha 1	2186	rs10874639	1 103133909	Substance addiction and disorders	316	Fibrinogen	246	1.479	0.001502
Core matrisome	Collagens	COL11A1	collagen, type XI, alpha 1	2186	rs10874639	1 103133909	Hyperventilation	513.4	Fibrinogen	54	2.035	0.002258
Core matrisome	Collagens	COL11A1	collagen, type XI, alpha 1	2186	rs10874639	1 103133909	Hematuria	593	Fibrinogen	1939	1.192	0.002965
Core matrisome	Collagens	COL11A1	collagen, type XI, alpha 1	2186	rs10874639	1 103133909	Acquired spondylolisthesis	738.4	Fibrinogen	227	1.447	0.00409
Core matrisome	Collagens	COL11A1	collagen, type XI, alpha 1	2186	rs10874639	1 103133909	Respiratory abnormalities	513	Fibrinogen	206	1.457	0.005447
Core matrisome	Collagens	COL11A1	collagen, type XI, alpha 1	2186	rs10874639	1 103133909	Unequal leg length (acquired)	736.6	Fibrinogen	109	1.613	0.007591
Core matrisome	Collagens	COL11A1	collagen, type XI, alpha 1	2186	rs10874639	1 103133909	Dyspareunia	625.1	Fibrinogen	71	1.803	0.007754
Core matrisome	Collagens	COL11A1	collagen, type XI, alpha 1	2186	rs10874639	1 103133909	Other signs and symptoms in breast	613.7	Fibrinogen	174	1.516	0.007833
Core matrisome	Collagens	COL11A1	collagen, type XI, alpha 1	2186	rs10874639	1 103133909	Cachexia	260.1	Fibrinogen	32	2.171	0.008785
Core matrisome	Collagens	COL11A1	collagen, type XI, alpha 1	2186	rs10874639	1 103133909	Other conditions of brain, NOS	348.9	Fibrinogen	83	1.66	0.01011
Core matrisome	Collagens	COL11A1	collagen, type XI, alpha 1	2186	rs10874639	1 103133909	Oliguria and anuria	599.6	Fibrinogen	28	2.213	0.01142
Core matrisome	Collagens	COL11A1	collagen, type XI, alpha 1	2186	rs10874639	1 103133909	Chronic pain syndrome	355.1	Fibrinogen	61	1.759	0.01268
Core matrisome	Collagens	COL11A1	collagen, type XI, alpha 1	2186	rs10874639	1 103133909	Pulmonary embolism and infarction	415.1	Fibrinogen	319	1.325	0.01271
Core matrisome	Collagens	COL11A1	collagen, type XI, alpha 1	2186	rs10874639	1 103133909	Corneal dystrophy	364.5	Fibrinogen	253	1.392	0.01273
Core matrisome	Collagens	COL11A1	collagen, type XI, alpha 1	2186	rs10874639	1 103133909	Fuchs' dystrophy	364.51	Fibrinogen	107	1.588	0.01316
Core matrisome	Collagens	COL11A1	collagen, type XI, alpha 1	2186	rs10874639	1 103133909	Other nonmalignant breast conditions	613	Fibrinogen	1077	1.217	0.01386
Core matrisome	Collagens	COL11A1	collagen, type XI, alpha 1	2186	rs10874639	1 103133909	Postnasal drip	475.9	Fibrinogen	47	1.84	0.01417
Core matrisome	Collagens	COL11A1	collagen, type XI, alpha 1	2186	rs10874639	1 103133909	Optic atrophy	377.1	Fibrinogen	116	1.567	0.0149
Core matrisome	Collagens	COL11A1	collagen, type XI, alpha 1	2186	rs10874639	1 103133909	Breast cancer	174	Fibrinogen	705	1.225	0.01536
Core matrisome	Collagens	COL11A1	collagen, type XI, alpha 1	2186	rs10874639	1 103133909	Ankylosing spondylitis	715.2	Fibrinogen	25	2.229	0.01746
Core matrisome	Collagens	COL11A1	collagen, type XI, alpha 1	2186	rs10874639	1 103133909	Breast cancer	174.11	Fibrinogen	681	1.22	0.01949
Core matrisome	Collagens	COL11A1	collagen, type XI, alpha 1	2186	rs10874639	1 103133909	Lipoprotein disorders	277.51	Fibrinogen	178	1.409	0.0209
Core matrisome	Collagens	COL11A1	collagen, type XI, alpha 1	2186	rs10874639	1 103133909	Breast cancer, including in situ	174.1	Fibrinogen	695	1.215	0.0213
Core matrisome	Collagens	COL11A1	collagen, type XI, alpha 1	2186	rs10874639	1 103133909	Schizophrenia	295.1	Fibrinogen	60	1.712	0.02171
Core matrisome	Collagens	COL11A1	collagen, type XI, alpha 1	2186	rs10874639	1 103133909	Posttraumatic stress disorder	300.9	Fibrinogen	80	1.628	0.02187
Core matrisome	Collagens	COL11A1	collagen, type XI, alpha 1	2186	rs10874639	1 103133909	Cirrhosis of liver without mention of alcohol	571.51	Fibrinogen	120	1.49	0.0219
Core matrisome	Collagens	COL11A1	collagen, type XI, alpha 1	2186	rs10874639	1 103133909	Extrapyramidal disease and abnormal movement disorders	333	Fibrinogen	588	0.7945	0.02296
Core matrisome	Collagens	COL11A1	collagen, type XI, alpha 1	2186	rs10874639	1 103133909	Arthropathy associated with other disorders classified elsewhere	713	Fibrinogen	48	1.779	0.02455
Core matrisome	Collagens	COL11A1	collagen, type XI, alpha 1	2186	rs10874639	1 103133909	Disorders of diaphragm	513.8	Fibrinogen	38	1.898	0.02484
Core matrisome	Collagens	COL11A1	collagen, type XI, alpha 1	2186	rs10874639	1 103133909	Abnormal findings on mammogram or breast exam	611	Fibrinogen	2248	1.155	0.02493
Core matrisome	Collagens	COL11A1	collagen, type XI, alpha 1	2186	rs10874639	1 103133909	Internal derangement of knee	835	Fibrinogen	916	1.179	0.02527
Core matrisome	Collagens	COL11A1	collagen, type XI, alpha 1	2186	rs10874639	1 103133909	Acute prostatitis	601.11	Fibrinogen	67	0.4436	0.02661
Core matrisome	Collagens	COL11A1	collagen, type XI, alpha 1	2186	rs10874639	1 103133909	Other disorders of ear	388	Fibrinogen	314	1.328	0.02663
Core matrisome	Collagens	COL11A1	collagen, type XI, alpha 1	2186	rs10874639	1 103133909	Nausea and vomiting	789	Fibrinogen	1851	1.126	0.02875
Core matrisome	Collagens	COL11A1	collagen, type XI, alpha 1	2186	rs10874639	1 103133909	Male genital disorders	608	Fibrinogen	271	0.7	0.02945
Core matrisome	Collagens	COL11A1	collagen, type XI, alpha 1	2186	rs10874639	1 103133909	Unspecified erythematous condition	695.9	Fibrinogen	101	1.502	0.03099
Core matrisome	Collagens	COL11A1	collagen, type XI, alpha 1	2186	rs10874639	1 103133909	Reflux esophagitis	530.14	Fibrinogen	459	0.7811	0.03287
Core matrisome	Collagens	COL11A1	collagen, type XI, alpha 1	2186	rs10874639	1 103133909	Other acquired musculoskeletal deformity	738	Fibrinogen	353	1.262	0.03368
Core matrisome	Collagens	COL11A1	collagen, type XI, alpha 1	2186	rs10874639	1 103133909	Arthropathy NOS involving multiple sites	716.91	Fibrinogen	72	1.601	0.03382
Core matrisome	Collagens	COL11A1	collagen, type XI, alpha 1	2186	rs10874639	1 103133909	Inflammatory diseases of prostate	601	Fibrinogen	522	0.7684	0.03406
Core matrisome	Collagens	COL11A1	collagen, type XI, alpha 1	2186	rs10874639	1 103133909	Primary angle-closure glaucoma	365.2	Fibrinogen	544	1.251	0.03414
Core matrisome	Collagens	COL11A1	collagen, type XI, alpha 1	2186	rs10874639	1 103133909	Biliary cirrhosis	571.6	Fibrinogen	26	2.02	0.03439
Core matrisome	Collagens	COL11A1	collagen, type XI, alpha 1	2186	rs10874639	1 103133909	Toxic effect of venom	913	Fibrinogen	89	1.51	0.0376
Core matrisome	Collagens	COL11A1	collagen, type XI, alpha 1	2186	rs10874639	1 103133909	Other disorders of lipoid metabolism and hyperalimentation	277.5	Fibrinogen	263	1.296	0.0378
Core matrisome	Collagens	COL11A1	collagen, type XI, alpha 1	2186	rs10874639	1 103133909	Arthropathy associated with neurological disorders	713.5	Fibrinogen	40	1.787	0.03833
Core matrisome	Collagens	COL11A1	collagen, type XI, alpha 1	2186	rs10874639	1 103133909	Lymphadenitis	289.4	Fibrinogen	597	0.8127	0.03842
Core matrisome	Collagens	COL11A1	collagen, type XI, alpha 1	2186	rs10874639	1 103133909	Benign neoplasm of respiratory and intrathoracic organs	212	Fibrinogen	49	1.697	0.03863
Core matrisome	Collagens	COL11A1	collagen, type XI, alpha 1	2186	rs10874639	1 103133909	Type 1 diabetic ketoacidosis	250.11	Fibrinogen	127	1.429	0.03997
Core matrisome	Collagens	COL11A1	collagen, type XI, alpha 1	2186	rs10874639	1 103133909	Open wound of finger(s)	871.2	Fibrinogen	761	1.188	0.04072
Core matrisome	Collagens	COL11A1	collagen, type XI, alpha 1	2186	rs10874639	1 103133909	Other conditions of brain	348	Fibrinogen	205	1.324	0.04101
Core matrisome	Collagens	COL11A1	collagen, type XI, alpha 1	2186	rs10874639	1 103133909	Precordial pain	418.1	Fibrinogen	223	0.7054	0.04135
Core matrisome	Collagens	COL11A1	collagen, type XI, alpha 1	2186	rs10874639	1 103133909	Ischemic Heart Disease	411	Fibrinogen	4085	0.9099	0.0431
Core matrisome	Collagens	COL11A1	collagen, type XI, alpha 1	2186	rs10874639	1 103133909	Abnormal mammogram	611.1	Fibrinogen	933	1.201	0.04487
Core matrisome	Collagens	COL11A1	collagen, type XI, alpha 1	2186	rs10874639	1 103133909	Lump or mass in breast	611.3	Fibrinogen	1002	1.179	0.04495
Core matrisome	Collagens	COL11A1	collagen, type XI, alpha 1	2186	rs10874639	1 103133909	Bipolar	296.1	Fibrinogen	138	1.401	0.04499
Core matrisome	Collagens	COL11A1	collagen, type XI, alpha 1	2186	rs10874639	1 103133909	Bladder neck obstruction	596.1	Fibrinogen	308	1.277	0.045
Core matrisome	Collagens	COL11A1	collagen, type XI, alpha 1	2186	rs10874639	1 103133909	Circumscribed scleroderma	693	Fibrinogen	143	1.394	0.04595
Core matrisome	Collagens	COL11A1	collagen, type XI, alpha 1	2186	rs10874639	1 103133909	Lung involvement in conditions classified elsewhere	510.1	Fibrinogen	30	1.886	0.04613
Core matrisome	Collagens	COL11A1	collagen, type XI, alpha 1	2186	rs10874639	1 103133909	Abnormal movement	350	Fibrinogen	1838	0.8877	0.04685
Core matrisome	Collagens	COL11A1	collagen, type XI, alpha 1	2186	rs10874639	1 103133909	Bronchitis	497	Fibrinogen	1449	1.152	0.04707
Core matrisome	Collagens	COL11A1	collagen, type XI, alpha 1	2186	rs10874639	1 103133909	Anal and rectal conditions	565	Fibrinogen	967	1.155	0.04749
Core matrisome	Collagens	COL11A1	collagen, type XI, alpha 1	2186	rs10874639	1 103133909	Disorders of cornea	364	Fibrinogen	662	1.203	0.04851
Core matrisome	Collagens	COL13A1	collagen, type XIII, alpha 1	2190	rs1227756	10 71588504	Disorders of diaphragm	513.8	Non-alcoholic fatty liver disease, Lobular inflamation	38	0.3807	3.689e-4
Core matrisome	Collagens	COL13A1	collagen, type XIII, alpha 1	2190	rs1227756	10 71588504	Abnormal glucose	250.4	Non-alcoholic fatty liver disease, Lobular inflamation	1829	0.8709	4.963e-4
Core matrisome	Collagens	COL13A1	collagen, type XIII, alpha 1	2190	rs1227756	10 71588504	Fracture of hand or wrist	804	Non-alcoholic fatty liver disease, Lobular inflamation	691	0.8236	8.989e-4
Core matrisome	Collagens	COL13A1	collagen, type XIII, alpha 1	2190	rs7077164	10 71583198	Disorders of diaphragm	513.8	Non-alcoholic fatty liver disease, Lobular inflamation	38	0.3304	0.001183
Core matrisome	Collagens	COL13A1	collagen, type XIII, alpha 1	2190	rs1227756	10 71588504	Prurigo	695.6	Non-alcoholic fatty liver disease, Lobular inflamation	274	1.325	0.002133
Core matrisome	Collagens	COL13A1	collagen, type XIII, alpha 1	2190	rs1227756	10 71588504	Other abnormal glucose	250.42	Non-alcoholic fatty liver disease, Lobular inflamation	1078	0.8613	0.002365
Core matrisome	Collagens	COL13A1	collagen, type XIII, alpha 1	2190	rs1227756	10 71588504	Other disorders of tympanic membrane	384	Non-alcoholic fatty liver disease, Lobular inflamation	116	1.499	0.002601
Core matrisome	Collagens	COL13A1	collagen, type XIII, alpha 1	2190	rs1227756	10 71588504	Colles' fracture	803.21	Non-alcoholic fatty liver disease, Lobular inflamation	157	0.697	0.002619
Core matrisome	Collagens	COL13A1	collagen, type XIII, alpha 1	2190	rs7077164	10 71583198	Loose body in joint	742.1	Non-alcoholic fatty liver disease, Lobular inflamation	28	0.2945	0.002739
Core matrisome	Collagens	COL13A1	collagen, type XIII, alpha 1	2190	rs1227756	10 71588504	Eustachian tube disorders	381	Non-alcoholic fatty liver disease, Lobular inflamation	1425	1.133	0.003373
Core matrisome	Collagens	COL13A1	collagen, type XIII, alpha 1	2190	rs1227756	10 71588504	Photodermatitis & sunburn	938	Non-alcoholic fatty liver disease, Lobular inflamation	747	1.175	0.005818
Core matrisome	Collagens	COL13A1	collagen, type XIII, alpha 1	2190	rs1227756	10 71588504	Erythematous conditions	695	Non-alcoholic fatty liver disease, Lobular inflamation	1405	1.127	0.006176
Core matrisome	Collagens	COL13A1	collagen, type XIII, alpha 1	2190	rs7077164	10 71583198	Other disorders of tympanic membrane	384	Non-alcoholic fatty liver disease, Lobular inflamation	116	1.45	0.00662
Core matrisome	Collagens	COL13A1	collagen, type XIII, alpha 1	2190	rs1227756	10 71588504	Fracture of radius and ulna	803.2	Non-alcoholic fatty liver disease, Lobular inflamation	621	0.8462	0.006798
Core matrisome	Collagens	COL13A1	collagen, type XIII, alpha 1	2190	rs1227756	10 71588504	Chronic venous hypertension	453	Non-alcoholic fatty liver disease, Lobular inflamation	31	2.043	0.006891
Core matrisome	Collagens	COL13A1	collagen, type XIII, alpha 1	2190	rs7077164	10 71583198	Impaction of intestine	560.2	Non-alcoholic fatty liver disease, Lobular inflamation	27	2.166	0.007209
Core matrisome	Collagens	COL13A1	collagen, type XIII, alpha 1	2190	rs7077164	10 71583198	Fever of unknown origin	783	Non-alcoholic fatty liver disease, Lobular inflamation	1564	0.8905	0.007385
Core matrisome	Collagens	COL13A1	collagen, type XIII, alpha 1	2190	rs1227756	10 71588504	Disease of tricuspid valve	394.7	Non-alcoholic fatty liver disease, Lobular inflamation	338	0.797	0.007673
Core matrisome	Collagens	COL13A1	collagen, type XIII, alpha 1	2190	rs1227756	10 71588504	Heart valve replaced	395.6	Non-alcoholic fatty liver disease, Lobular inflamation	241	0.7763	0.007936
Core matrisome	Collagens	COL13A1	collagen, type XIII, alpha 1	2190	rs1227756	10 71588504	Carbohydrate transport and metabolism disorder	271	Non-alcoholic fatty liver disease, Lobular inflamation	668	0.8552	0.008376
Core matrisome	Collagens	COL13A1	collagen, type XIII, alpha 1	2190	rs1227756	10 71588504	Other conditions of brain	348	Non-alcoholic fatty liver disease, Lobular inflamation	205	0.766	0.009574
Core matrisome	Collagens	COL13A1	collagen, type XIII, alpha 1	2190	rs1227756	10 71588504	Otitis media	381.1	Non-alcoholic fatty liver disease, Lobular inflamation	1063	1.135	0.009607
Core matrisome	Collagens	COL13A1	collagen, type XIII, alpha 1	2190	rs1227756	10 71588504	Methicillin resistant Staphylococcus aureus	041.12	Non-alcoholic fatty liver disease, Lobular inflamation	40	0.5339	0.009612
Core matrisome	Collagens	COL13A1	collagen, type XIII, alpha 1	2190	rs7077164	10 71583198	Fasciitis	728.7	Non-alcoholic fatty liver disease, Lobular inflamation	974	0.8555	0.009795
Core matrisome	Collagens	COL13A1	collagen, type XIII, alpha 1	2190	rs1227756	10 71588504	Ulcer of esophagus	530.12	Non-alcoholic fatty liver disease, Lobular inflamation	126	0.7092	0.009984
Core matrisome	Collagens	COL13A1	collagen, type XIII, alpha 1	2190	rs1227756	10 71588504	Suppurative and unspecified otitis media	381.11	Non-alcoholic fatty liver disease, Lobular inflamation	768	1.156	0.01024
Core matrisome	Collagens	COL13A1	collagen, type XIII, alpha 1	2190	rs1227756	10 71588504	Disaccharide malabsorption	271.3	Non-alcoholic fatty liver disease, Lobular inflamation	656	0.8578	0.01032
Core matrisome	Collagens	COL13A1	collagen, type XIII, alpha 1	2190	rs1227756	10 71588504	Glossodynia	529.6	Non-alcoholic fatty liver disease, Lobular inflamation	40	0.5341	0.01068
Core matrisome	Collagens	COL13A1	collagen, type XIII, alpha 1	2190	rs1227756	10 71588504	Cellulitis and abscess of trunk	681.7	Non-alcoholic fatty liver disease, Lobular inflamation	229	1.271	0.01112
Core matrisome	Collagens	COL13A1	collagen, type XIII, alpha 1	2190	rs1227756	10 71588504	Supraventricular premature beats	427.61	Non-alcoholic fatty liver disease, Lobular inflamation	207	0.7567	0.01125
Core matrisome	Collagens	COL13A1	collagen, type XIII, alpha 1	2190	rs7077164	10 71583198	Prurigo	695.6	Non-alcoholic fatty liver disease, Lobular inflamation	274	1.275	0.01138
Core matrisome	Collagens	COL13A1	collagen, type XIII, alpha 1	2190	rs1227756	10 71588504	Open wound of nose and sinus	870.4	Non-alcoholic fatty liver disease, Lobular inflamation	31	1.942	0.01149
Core matrisome	Collagens	COL13A1	collagen, type XIII, alpha 1	2190	rs7077164	10 71583198	Endometrial hyperplasia	621	Non-alcoholic fatty liver disease, Lobular inflamation	118	1.405	0.01173
Core matrisome	Collagens	COL13A1	collagen, type XIII, alpha 1	2190	rs7077164	10 71583198	Failure to thrive	264.2	Non-alcoholic fatty liver disease, Lobular inflamation	144	0.704	0.0133
Core matrisome	Collagens	COL13A1	collagen, type XIII, alpha 1	2190	rs7077164	10 71583198	Other hypertensive complications	401.3	Non-alcoholic fatty liver disease, Lobular inflamation	353	0.799	0.01428
Core matrisome	Collagens	COL13A1	collagen, type XIII, alpha 1	2190	rs1227756	10 71588504	ASCVD	414.2	Non-alcoholic fatty liver disease, Lobular inflamation	166	1.319	0.01512
Core matrisome	Collagens	COL13A1	collagen, type XIII, alpha 1	2190	rs7077164	10 71583198	Acute reaction to stress	300.8	Non-alcoholic fatty liver disease, Lobular inflamation	339	1.233	0.01519
Core matrisome	Collagens	COL13A1	collagen, type XIII, alpha 1	2190	rs1227756	10 71588504	Bundle branch block	426.3	Non-alcoholic fatty liver disease, Lobular inflamation	642	0.8509	0.01572
Core matrisome	Collagens	COL13A1	collagen, type XIII, alpha 1	2190	rs7077164	10 71583198	Anemia of chronic disease	285.2	Non-alcoholic fatty liver disease, Lobular inflamation	492	0.8341	0.01575
Core matrisome	Collagens	COL13A1	collagen, type XIII, alpha 1	2190	rs1227756	10 71588504	Inflammatory disease of breast	613.1	Non-alcoholic fatty liver disease, Lobular inflamation	84	0.6669	0.01587
Core matrisome	Collagens	COL13A1	collagen, type XIII, alpha 1	2190	rs1227756	10 71588504	Impaction of intestine	560.2	Non-alcoholic fatty liver disease, Lobular inflamation	27	2.002	0.0163
Core matrisome	Collagens	COL13A1	collagen, type XIII, alpha 1	2190	rs7077164	10 71583198	Heart valve replaced	395.6	Non-alcoholic fatty liver disease, Lobular inflamation	241	0.7739	0.01688
Core matrisome	Collagens	COL13A1	collagen, type XIII, alpha 1	2190	rs7077164	10 71583198	Diseases of blood and blood-forming organs	289	Non-alcoholic fatty liver disease, Lobular inflamation	363	0.8154	0.01767
Core matrisome	Collagens	COL13A1	collagen, type XIII, alpha 1	2190	rs7077164	10 71583198	Abnormal glucose	250.4	Non-alcoholic fatty liver disease, Lobular inflamation	1829	0.9028	0.01796
Core matrisome	Collagens	COL13A1	collagen, type XIII, alpha 1	2190	rs1227756	10 71588504	Urinary complications	597.2	Non-alcoholic fatty liver disease, Lobular inflamation	101	0.7048	0.01872
Core matrisome	Collagens	COL13A1	collagen, type XIII, alpha 1	2190	rs1227756	10 71588504	Fever of unknown origin	783	Non-alcoholic fatty liver disease, Lobular inflamation	1564	0.911	0.01903
Core matrisome	Collagens	COL13A1	collagen, type XIII, alpha 1	2190	rs1227756	10 71588504	Hidradenitis	705.3	Non-alcoholic fatty liver disease, Lobular inflamation	25	1.985	0.01912
Core matrisome	Collagens	COL13A1	collagen, type XIII, alpha 1	2190	rs7077164	10 71583198	Muscular wasting and disuse atrophy	772.1	Non-alcoholic fatty liver disease, Lobular inflamation	67	0.6145	0.01974
Core matrisome	Collagens	COL13A1	collagen, type XIII, alpha 1	2190	rs7077164	10 71583198	Cancer of bone & connective tissue	170	Non-alcoholic fatty liver disease, Lobular inflamation	105	0.6845	0.02007
Core matrisome	Collagens	COL13A1	collagen, type XIII, alpha 1	2190	rs7077164	10 71583198	Lichen	695.7	Non-alcoholic fatty liver disease, Lobular inflamation	88	1.446	0.0201
Core matrisome	Collagens	COL13A1	collagen, type XIII, alpha 1	2190	rs1227756	10 71588504	Perforation of tympanic membrane	384.4	Non-alcoholic fatty liver disease, Lobular inflamation	92	1.417	0.02025
Core matrisome	Collagens	COL13A1	collagen, type XIII, alpha 1	2190	rs7077164	10 71583198	Bacterial infection NOS	041	Non-alcoholic fatty liver disease, Lobular inflamation	1040	0.8878	0.02057
Core matrisome	Collagens	COL13A1	collagen, type XIII, alpha 1	2190	rs7077164	10 71583198	Gross hematuria	593.1	Non-alcoholic fatty liver disease, Lobular inflamation	73	1.5	0.02059
Core matrisome	Collagens	COL13A1	collagen, type XIII, alpha 1	2190	rs1227756	10 71588504	Nephrotic syndrome without mention of glomerulonephritis	580.2	Non-alcoholic fatty liver disease, Lobular inflamation	35	1.746	0.02154
Core matrisome	Collagens	COL13A1	collagen, type XIII, alpha 1	2190	rs7077164	10 71583198	Other disorders of bone and cartilage	733	Non-alcoholic fatty liver disease, Lobular inflamation	427	0.8339	0.02168
Core matrisome	Collagens	COL13A1	collagen, type XIII, alpha 1	2190	rs1227756	10 71588504	Pancreatic cancer	157	Non-alcoholic fatty liver disease, Lobular inflamation	85	0.6931	0.02227
Core matrisome	Collagens	COL13A1	collagen, type XIII, alpha 1	2190	rs7077164	10 71583198	Secondary malignancy of lung	198.2	Non-alcoholic fatty liver disease, Lobular inflamation	140	0.727	0.02299
Core matrisome	Collagens	COL13A1	collagen, type XIII, alpha 1	2190	rs1227756	10 71588504	Cancer of connective tissue	170.2	Non-alcoholic fatty liver disease, Lobular inflamation	62	0.6511	0.02339
Core matrisome	Collagens	COL13A1	collagen, type XIII, alpha 1	2190	rs1227756	10 71588504	Complication of amputation stump	874	Non-alcoholic fatty liver disease, Lobular inflamation	40	0.5789	0.0241
Core matrisome	Collagens	COL13A1	collagen, type XIII, alpha 1	2190	rs7077164	10 71583198	Other abnormal glucose	250.42	Non-alcoholic fatty liver disease, Lobular inflamation	1078	0.8862	0.02428
Core matrisome	Collagens	COL13A1	collagen, type XIII, alpha 1	2190	rs7077164	10 71583198	Fracture of radius and ulna	803.2	Non-alcoholic fatty liver disease, Lobular inflamation	621	0.8601	0.02464
Core matrisome	Collagens	COL13A1	collagen, type XIII, alpha 1	2190	rs7077164	10 71583198	Anaphylactic shock NOS	946	Non-alcoholic fatty liver disease, Lobular inflamation	99	0.6804	0.02465
Core matrisome	Collagens	COL13A1	collagen, type XIII, alpha 1	2190	rs7077164	10 71583198	Malunion fracture	733.8	Non-alcoholic fatty liver disease, Lobular inflamation	121	0.7137	0.025
Core matrisome	Collagens	COL13A1	collagen, type XIII, alpha 1	2190	rs7077164	10 71583198	Cancer of connective tissue	170.2	Non-alcoholic fatty liver disease, Lobular inflamation	62	0.6143	0.02507
Core matrisome	Collagens	COL13A1	collagen, type XIII, alpha 1	2190	rs7077164	10 71583198	Disorders of muscle, ligament, and fascia	728	Non-alcoholic fatty liver disease, Lobular inflamation	1031	0.8775	0.02599
Core matrisome	Collagens	COL13A1	collagen, type XIII, alpha 1	2190	rs1227756	10 71588504	Glaucoma	365	Non-alcoholic fatty liver disease, Lobular inflamation	2586	1.093	0.02604
Core matrisome	Collagens	COL13A1	collagen, type XIII, alpha 1	2190	rs1227756	10 71588504	Sepsis	994.2	Non-alcoholic fatty liver disease, Lobular inflamation	270	0.8203	0.02658
Core matrisome	Collagens	COL13A1	collagen, type XIII, alpha 1	2190	rs1227756	10 71588504	Phosphorus metabolism disorder	275.53	Non-alcoholic fatty liver disease, Lobular inflamation	115	0.7401	0.0274
Core matrisome	Collagens	COL13A1	collagen, type XIII, alpha 1	2190	rs1227756	10 71588504	Posterior pituitary disorders	253.3	Non-alcoholic fatty liver disease, Lobular inflamation	53	1.539	0.02781
Core matrisome	Collagens	COL13A1	collagen, type XIII, alpha 1	2190	rs1227756	10 71588504	Delirium due to conditions classified elsewhere	290.2	Non-alcoholic fatty liver disease, Lobular inflamation	157	0.77	0.02823
Core matrisome	Collagens	COL13A1	collagen, type XIII, alpha 1	2190	rs7077164	10 71583198	Fracture of foot	801.1	Non-alcoholic fatty liver disease, Lobular inflamation	468	0.8482	0.02891
Core matrisome	Collagens	COL13A1	collagen, type XIII, alpha 1	2190	rs1227756	10 71588504	Exophthalmos	242.3	Non-alcoholic fatty liver disease, Lobular inflamation	39	1.651	0.02973
Core matrisome	Collagens	COL13A1	collagen, type XIII, alpha 1	2190	rs7077164	10 71583198	Intestinal malabsorption NOS	557.9	Non-alcoholic fatty liver disease, Lobular inflamation	59	1.512	0.02996
Core matrisome	Collagens	COL13A1	collagen, type XIII, alpha 1	2190	rs7077164	10 71583198	Colles' fracture	803.21	Non-alcoholic fatty liver disease, Lobular inflamation	157	0.7538	0.03029
Core matrisome	Collagens	COL13A1	collagen, type XIII, alpha 1	2190	rs7077164	10 71583198	Hemorrhage in early pregnancy	636.3	Non-alcoholic fatty liver disease, Lobular inflamation	28	1.799	0.03036
Core matrisome	Collagens	COL13A1	collagen, type XIII, alpha 1	2190	rs1227756	10 71588504	Ovarian cancer	184.1	Non-alcoholic fatty liver disease, Lobular inflamation	79	0.6989	0.0315
Core matrisome	Collagens	COL13A1	collagen, type XIII, alpha 1	2190	rs1227756	10 71588504	Sepsis and SIRS	994	Non-alcoholic fatty liver disease, Lobular inflamation	290	0.8313	0.03186
Core matrisome	Collagens	COL13A1	collagen, type XIII, alpha 1	2190	rs1227756	10 71588504	Right bundle branch block	426.31	Non-alcoholic fatty liver disease, Lobular inflamation	314	0.8245	0.03201
Core matrisome	Collagens	COL13A1	collagen, type XIII, alpha 1	2190	rs1227756	10 71588504	Disturbances of sensation of smell and taste	350.6	Non-alcoholic fatty liver disease, Lobular inflamation	69	1.448	0.03204
Core matrisome	Collagens	COL13A1	collagen, type XIII, alpha 1	2190	rs1227756	10 71588504	Other specified cardiac dysrhythmias	427.3	Non-alcoholic fatty liver disease, Lobular inflamation	1581	0.9064	0.03238
Core matrisome	Collagens	COL13A1	collagen, type XIII, alpha 1	2190	rs1227756	10 71588504	Adverse effects of adrenal cortical steroids	962.1	Non-alcoholic fatty liver disease, Lobular inflamation	82	1.406	0.03246
Core matrisome	Collagens	COL13A1	collagen, type XIII, alpha 1	2190	rs7077164	10 71583198	Adverse effects of antirheumatics	965.2	Non-alcoholic fatty liver disease, Lobular inflamation	56	0.6156	0.03252
Core matrisome	Collagens	COL13A1	collagen, type XIII, alpha 1	2190	rs7077164	10 71583198	Fracture of hand or wrist	804	Non-alcoholic fatty liver disease, Lobular inflamation	691	0.8736	0.03276
Core matrisome	Collagens	COL13A1	collagen, type XIII, alpha 1	2190	rs7077164	10 71583198	Lack of normal physiological development	264	Non-alcoholic fatty liver disease, Lobular inflamation	165	0.7592	0.03288
Core matrisome	Collagens	COL13A1	collagen, type XIII, alpha 1	2190	rs1227756	10 71588504	Other disorders of bone and cartilage	733	Non-alcoholic fatty liver disease, Lobular inflamation	427	0.8577	0.03298
Core matrisome	Collagens	COL13A1	collagen, type XIII, alpha 1	2190	rs7077164	10 71583198	Chronic venous hypertension	453	Non-alcoholic fatty liver disease, Lobular inflamation	31	1.73	0.03302
Core matrisome	Collagens	COL13A1	collagen, type XIII, alpha 1	2190	rs7077164	10 71583198	Urinary tract infection	591	Non-alcoholic fatty liver disease, Lobular inflamation	3286	1.084	0.03304
Core matrisome	Collagens	COL13A1	collagen, type XIII, alpha 1	2190	rs1227756	10 71588504	Anaphylactic shock NOS	946	Non-alcoholic fatty liver disease, Lobular inflamation	99	0.7302	0.03403
Core matrisome	Collagens	COL13A1	collagen, type XIII, alpha 1	2190	rs1227756	10 71588504	Cancer of bone & connective tissue	170	Non-alcoholic fatty liver disease, Lobular inflamation	105	0.7387	0.03449
Core matrisome	Collagens	COL13A1	collagen, type XIII, alpha 1	2190	rs1227756	10 71588504	Crystal arthropathies	274.2	Non-alcoholic fatty liver disease, Lobular inflamation	171	1.263	0.03507
Core matrisome	Collagens	COL13A1	collagen, type XIII, alpha 1	2190	rs1227756	10 71588504	Polyneuropathy in diabetes	250.6	Non-alcoholic fatty liver disease, Lobular inflamation	539	0.8729	0.03526
Core matrisome	Collagens	COL13A1	collagen, type XIII, alpha 1	2190	rs1227756	10 71588504	Other congenital anomalies of skin	691	Non-alcoholic fatty liver disease, Lobular inflamation	122	1.32	0.03532
Core matrisome	Collagens	COL13A1	collagen, type XIII, alpha 1	2190	rs1227756	10 71588504	Nonrheumatic pulmonary valve disorders	395.4	Non-alcoholic fatty liver disease, Lobular inflamation	70	0.6864	0.03538
Core matrisome	Collagens	COL13A1	collagen, type XIII, alpha 1	2190	rs7077164	10 71583198	Calculus of lower urinary tract	594.2	Non-alcoholic fatty liver disease, Lobular inflamation	63	1.48	0.03605
Core matrisome	Collagens	COL13A1	collagen, type XIII, alpha 1	2190	rs7077164	10 71583198	Nephrotic syndrome without mention of glomerulonephritis	580.2	Non-alcoholic fatty liver disease, Lobular inflamation	35	1.664	0.03615
Core matrisome	Collagens	COL13A1	collagen, type XIII, alpha 1	2190	rs7077164	10 71583198	Early or threatened labor; hemorrhage in early pregnancy	636	Non-alcoholic fatty liver disease, Lobular inflamation	68	1.481	0.0363
Core matrisome	Collagens	COL13A1	collagen, type XIII, alpha 1	2190	rs1227756	10 71588504	Mechanical complications of cardiac/vascular device, implant, and graft	854	Non-alcoholic fatty liver disease, Lobular inflamation	340	0.8467	0.03667
Core matrisome	Collagens	COL13A1	collagen, type XIII, alpha 1	2190	rs7077164	10 71583198	Open wound of nose and sinus	870.4	Non-alcoholic fatty liver disease, Lobular inflamation	31	1.715	0.03765
Core matrisome	Collagens	COL13A1	collagen, type XIII, alpha 1	2190	rs1227756	10 71588504	Unspecified polyarthropathy or polyarthritis	716.1	Non-alcoholic fatty liver disease, Lobular inflamation	92	1.361	0.03786
Core matrisome	Collagens	COL13A1	collagen, type XIII, alpha 1	2190	rs1227756	10 71588504	Generalized hyperhidrosis	705.8	Non-alcoholic fatty liver disease, Lobular inflamation	189	1.244	0.03895
Core matrisome	Collagens	COL13A1	collagen, type XIII, alpha 1	2190	rs1227756	10 71588504	Acute reaction to stress	300.8	Non-alcoholic fatty liver disease, Lobular inflamation	339	1.185	0.039
Core matrisome	Collagens	COL13A1	collagen, type XIII, alpha 1	2190	rs7077164	10 71583198	Dupuytren's disease	728.71	Non-alcoholic fatty liver disease, Lobular inflamation	156	0.7569	0.03912
Core matrisome	Collagens	COL13A1	collagen, type XIII, alpha 1	2190	rs1227756	10 71588504	Systemic lupus erythematosus	695.42	Non-alcoholic fatty liver disease, Lobular inflamation	98	1.349	0.03919
Core matrisome	Collagens	COL13A1	collagen, type XIII, alpha 1	2190	rs1227756	10 71588504	Mitral valve stenosis and/or aortic valve stenosis	394.1	Non-alcoholic fatty liver disease, Lobular inflamation	407	0.8568	0.03921
Core matrisome	Collagens	COL13A1	collagen, type XIII, alpha 1	2190	rs1227756	10 71588504	Dyschromia and Vitiligo	694	Non-alcoholic fatty liver disease, Lobular inflamation	513	1.146	0.03941
Core matrisome	Collagens	COL13A1	collagen, type XIII, alpha 1	2190	rs1227756	10 71588504	Polycythemia vera	200.1	Non-alcoholic fatty liver disease, Lobular inflamation	46	1.539	0.03946
Core matrisome	Collagens	COL13A1	collagen, type XIII, alpha 1	2190	rs1227756	10 71588504	Loose body in joint	742.1	Non-alcoholic fatty liver disease, Lobular inflamation	28	0.5527	0.03979
Core matrisome	Collagens	COL13A1	collagen, type XIII, alpha 1	2190	rs7077164	10 71583198	Urethral stricture (not specified as infectious)	597.1	Non-alcoholic fatty liver disease, Lobular inflamation	124	1.32	0.03992
Core matrisome	Collagens	COL13A1	collagen, type XIII, alpha 1	2190	rs1227756	10 71588504	Cellulitis and abscess of arm	681.3	Non-alcoholic fatty liver disease, Lobular inflamation	326	1.18	0.04017
Core matrisome	Collagens	COL13A1	collagen, type XIII, alpha 1	2190	rs1227756	10 71588504	severe protein-calorie malnutrition	260.2	Non-alcoholic fatty liver disease, Lobular inflamation	81	1.391	0.04054
Core matrisome	Collagens	COL13A1	collagen, type XIII, alpha 1	2190	rs1227756	10 71588504	Fracture of upper limb	803	Non-alcoholic fatty liver disease, Lobular inflamation	1015	0.9034	0.04059
Core matrisome	Collagens	COL13A1	collagen, type XIII, alpha 1	2190	rs1227756	10 71588504	Cellulitis and abscess of hand/fingers	681.1	Non-alcoholic fatty liver disease, Lobular inflamation	581	0.8799	0.04179
Core matrisome	Collagens	COL13A1	collagen, type XIII, alpha 1	2190	rs7077164	10 71583198	Other forms of chronic heart disease	414	Non-alcoholic fatty liver disease, Lobular inflamation	551	1.152	0.0425
Core matrisome	Collagens	COL13A1	collagen, type XIII, alpha 1	2190	rs7077164	10 71583198	Cachexia	260.1	Non-alcoholic fatty liver disease, Lobular inflamation	32	1.687	0.04279
Core matrisome	Collagens	COL13A1	collagen, type XIII, alpha 1	2190	rs1227756	10 71588504	Type 2 diabetic retinopathy	250.23	Non-alcoholic fatty liver disease, Lobular inflamation	498	0.8734	0.04332
Core matrisome	Collagens	COL13A1	collagen, type XIII, alpha 1	2190	rs1227756	10 71588504	Retinal vascular changes and abnomalities	362.4	Non-alcoholic fatty liver disease, Lobular inflamation	496	0.8614	0.04334
Core matrisome	Collagens	COL13A1	collagen, type XIII, alpha 1	2190	rs1227756	10 71588504	Calculus of lower urinary tract	594.2	Non-alcoholic fatty liver disease, Lobular inflamation	63	1.439	0.04359
Core matrisome	Collagens	COL13A1	collagen, type XIII, alpha 1	2190	rs7077164	10 71583198	Thoracic neuritis/radiculitis	763	Non-alcoholic fatty liver disease, Lobular inflamation	1659	0.916	0.04548
Core matrisome	Collagens	COL13A1	collagen, type XIII, alpha 1	2190	rs1227756	10 71588504	Aneurysm of artery of lower extremity	442.3	Non-alcoholic fatty liver disease, Lobular inflamation	85	0.7179	0.0456
Core matrisome	Collagens	COL13A1	collagen, type XIII, alpha 1	2190	rs7077164	10 71583198	Retinoschisis and retinal cysts	361.2	Non-alcoholic fatty liver disease, Lobular inflamation	30	0.5128	0.04573
Core matrisome	Collagens	COL13A1	collagen, type XIII, alpha 1	2190	rs1227756	10 71588504	Chondrocalcinosis	274.21	Non-alcoholic fatty liver disease, Lobular inflamation	167	1.251	0.04585
Core matrisome	Collagens	COL13A1	collagen, type XIII, alpha 1	2190	rs7077164	10 71583198	Perforation of tympanic membrane	384.4	Non-alcoholic fatty liver disease, Lobular inflamation	92	1.36	0.04606
Core matrisome	Collagens	COL13A1	collagen, type XIII, alpha 1	2190	rs7077164	10 71583198	Injuries to the nervous system	907	Non-alcoholic fatty liver disease, Lobular inflamation	78	0.6871	0.04635
Core matrisome	Collagens	COL13A1	collagen, type XIII, alpha 1	2190	rs7077164	10 71583198	Personality disorders	301	Non-alcoholic fatty liver disease, Lobular inflamation	371	0.8371	0.04667
Core matrisome	Collagens	COL13A1	collagen, type XIII, alpha 1	2190	rs1227756	10 71588504	Disorders of sweat glands	705	Non-alcoholic fatty liver disease, Lobular inflamation	303	1.183	0.04743
Core matrisome	Collagens	COL13A1	collagen, type XIII, alpha 1	2190	rs7077164	10 71583198	Drug-resistant infection	041.9	Non-alcoholic fatty liver disease, Lobular inflamation	150	0.768	0.04758
Core matrisome	Collagens	COL13A1	collagen, type XIII, alpha 1	2190	rs7077164	10 71583198	Cyst of kidney, acquired	586.2	Non-alcoholic fatty liver disease, Lobular inflamation	235	0.8092	0.04772
Core matrisome	Collagens	COL13A1	collagen, type XIII, alpha 1	2190	rs7077164	10 71583198	Hemorrhage NOS	459.1	Non-alcoholic fatty liver disease, Lobular inflamation	58	0.6415	0.04812
Core matrisome	Collagens	COL13A1	collagen, type XIII, alpha 1	2190	rs7077164	10 71583198	Irregular menstrual cycle	626.13	Non-alcoholic fatty liver disease, Lobular inflamation	314	1.261	0.04901
Core matrisome	Collagens	COL13A1	collagen, type XIII, alpha 1	2190	rs1227756	10 71588504	Malunion fracture	733.8	Non-alcoholic fatty liver disease, Lobular inflamation	121	0.7696	0.04965
Core matrisome	Collagens	COL13A1	collagen, type XIII, alpha 1	2190	rs7077164	10 71583198	Phosphorus metabolism disorder	275.53	Non-alcoholic fatty liver disease, Lobular inflamation	115	0.7415	0.04997
Core matrisome	Collagens	COL1A2	collagen, type I, alpha 2	2198	rs441051	7 94054000	Adverse effects of hormones and synthetic substitutes	962.3	Pulmonary function trait	25	2.867	1.703e-4
Core matrisome	Collagens	COL1A2	collagen, type I, alpha 2	2198	rs441051	7 94054000	Spirochetal infection	130	Pulmonary function trait	86	1.814	2.184e-4
Core matrisome	Collagens	COL1A2	collagen, type I, alpha 2	2198	rs441051	7 94054000	Lyme disease	130.1	Pulmonary function trait	83	1.77	5.093e-4
Core matrisome	Collagens	COL1A2	collagen, type I, alpha 2	2198	rs441051	7 94054000	Duodenitis	535.6	Pulmonary function trait	147	1.522	0.001084
Core matrisome	Collagens	COL1A2	collagen, type I, alpha 2	2198	rs441051	7 94054000	Wheezing	512.1	Pulmonary function trait	206	0.6623	0.002166
Core matrisome	Collagens	COL1A2	collagen, type I, alpha 2	2198	rs441051	7 94054000	Unequal leg length (acquired)	736.6	Pulmonary function trait	109	1.546	0.00348
Core matrisome	Collagens	COL1A2	collagen, type I, alpha 2	2198	rs441051	7 94054000	Open wounds of head; neck; and trunk	870	Pulmonary function trait	912	0.8318	0.003613
Core matrisome	Collagens	COL1A2	collagen, type I, alpha 2	2198	rs441051	7 94054000	Congenital anomalies of urinary system	751.2	Pulmonary function trait	107	0.5935	0.005929
Core matrisome	Collagens	COL1A2	collagen, type I, alpha 2	2198	rs441051	7 94054000	Symptoms and disorders of the joints	741	Pulmonary function trait	1520	1.136	0.006463
Core matrisome	Collagens	COL1A2	collagen, type I, alpha 2	2198	rs441051	7 94054000	Anorexia	260.6	Pulmonary function trait	167	0.6741	0.007184
Core matrisome	Collagens	COL1A2	collagen, type I, alpha 2	2198	rs441051	7 94054000	Claw toe	735.22	Pulmonary function trait	34	1.96	0.007428
Core matrisome	Collagens	COL1A2	collagen, type I, alpha 2	2198	rs441051	7 94054000	Nonrheumatic mitral valve disorders	395.1	Pulmonary function trait	949	1.163	0.007486
Core matrisome	Collagens	COL1A2	collagen, type I, alpha 2	2198	rs441051	7 94054000	Atrial flutter	427.22	Pulmonary function trait	463	1.237	0.01096
Core matrisome	Collagens	COL1A2	collagen, type I, alpha 2	2198	rs441051	7 94054000	Other acquired musculoskeletal deformity	738	Pulmonary function trait	353	1.244	0.01293
Core matrisome	Collagens	COL1A2	collagen, type I, alpha 2	2198	rs441051	7 94054000	Fever of unknown origin	783	Pulmonary function trait	1564	0.8893	0.01302
Core matrisome	Collagens	COL1A2	collagen, type I, alpha 2	2198	rs441051	7 94054000	Systolic/diastolic heart failure	428.1	Pulmonary function trait	1854	1.126	0.01347
Core matrisome	Collagens	COL1A2	collagen, type I, alpha 2	2198	rs441051	7 94054000	Second degree AV block	426.23	Pulmonary function trait	96	0.5956	0.01452
Core matrisome	Collagens	COL1A2	collagen, type I, alpha 2	2198	rs441051	7 94054000	Cerebral aneurysm	433.5	Pulmonary function trait	60	1.612	0.01454
Core matrisome	Collagens	COL1A2	collagen, type I, alpha 2	2198	rs441051	7 94054000	Neoplasm of uncertain behavior	199	Pulmonary function trait	547	1.187	0.01547
Core matrisome	Collagens	COL1A2	collagen, type I, alpha 2	2198	rs441051	7 94054000	Pelvic peritoneal adhesions, female (postoperative) (postinfection)	614.1	Pulmonary function trait	25	0.2839	0.01571
Core matrisome	Collagens	COL1A2	collagen, type I, alpha 2	2198	rs441051	7 94054000	Hypercalcemia	275.6	Pulmonary function trait	300	1.249	0.0168
Core matrisome	Collagens	COL1A2	collagen, type I, alpha 2	2198	rs441051	7 94054000	Disorders of the globe	360	Pulmonary function trait	111	1.415	0.01881
Core matrisome	Collagens	COL1A2	collagen, type I, alpha 2	2198	rs441051	7 94054000	Peritoneal adhesions (postoperative) (postinfection)	568.1	Pulmonary function trait	78	0.5921	0.01899
Core matrisome	Collagens	COL1A2	collagen, type I, alpha 2	2198	rs441051	7 94054000	Fracture of hand or wrist	804	Pulmonary function trait	691	1.163	0.02139
Core matrisome	Collagens	COL1A2	collagen, type I, alpha 2	2198	rs441051	7 94054000	Heart valve disorders	395	Pulmonary function trait	1812	1.105	0.02206
Core matrisome	Collagens	COL1A2	collagen, type I, alpha 2	2198	rs441051	7 94054000	Cardiac arrhythmia NOS	427.5	Pulmonary function trait	1290	1.144	0.02242
Core matrisome	Collagens	COL1A2	collagen, type I, alpha 2	2198	rs441051	7 94054000	Viral warts & HPV	078	Pulmonary function trait	874	0.8663	0.02352
Core matrisome	Collagens	COL1A2	collagen, type I, alpha 2	2198	rs441051	7 94054000	Unspecified erythematous condition	695.9	Pulmonary function trait	101	0.6615	0.02582
Core matrisome	Collagens	COL1A2	collagen, type I, alpha 2	2198	rs441051	7 94054000	Internal derangement of knee	835	Pulmonary function trait	916	0.8733	0.02626
Core matrisome	Collagens	COL1A2	collagen, type I, alpha 2	2198	rs441051	7 94054000	Genitourinary congenital anomalies	751	Pulmonary function trait	152	0.7178	0.02662
Core matrisome	Collagens	COL1A2	collagen, type I, alpha 2	2198	rs441051	7 94054000	Stricture and stenosis of esophagus	530.3	Pulmonary function trait	280	0.7823	0.02663
Core matrisome	Collagens	COL1A2	collagen, type I, alpha 2	2198	rs441051	7 94054000	Skin neoplasm of uncertain behavior	173	Pulmonary function trait	497	1.186	0.02692
Core matrisome	Collagens	COL1A2	collagen, type I, alpha 2	2198	rs441051	7 94054000	Heart failure	428	Pulmonary function trait	2044	1.108	0.026950000000000002
Core matrisome	Collagens	COL1A2	collagen, type I, alpha 2	2198	rs441051	7 94054000	Hemorrhage from gastrointestinal ulcer	531.1	Pulmonary function trait	140	0.7056	0.02705
Core matrisome	Collagens	COL1A2	collagen, type I, alpha 2	2198	rs441051	7 94054000	Sulfonamides	961.1	Pulmonary function trait	320	1.236	0.02713
Core matrisome	Collagens	COL1A2	collagen, type I, alpha 2	2198	rs441051	7 94054000	Congenital deformities of feet	755.1	Pulmonary function trait	213	1.277	0.02716
Core matrisome	Collagens	COL1A2	collagen, type I, alpha 2	2198	rs441051	7 94054000	Cystic kidney disease	751.21	Pulmonary function trait	75	0.6157	0.02952
Core matrisome	Collagens	COL1A2	collagen, type I, alpha 2	2198	rs441051	7 94054000	Other diseases of respiratory system	519.8	Pulmonary function trait	151	1.319	0.02985
Core matrisome	Collagens	COL1A2	collagen, type I, alpha 2	2198	rs441051	7 94054000	Nontoxic nodular goiter	241	Pulmonary function trait	589	1.163	0.03023
Core matrisome	Collagens	COL1A2	collagen, type I, alpha 2	2198	rs441051	7 94054000	Alopecia	704.1	Pulmonary function trait	209	0.7631	0.0312
Core matrisome	Collagens	COL1A2	collagen, type I, alpha 2	2198	rs441051	7 94054000	Complications of gastrostomy, colostomy and enterostomy	536.7	Pulmonary function trait	35	0.4458	0.03222
Core matrisome	Collagens	COL1A2	collagen, type I, alpha 2	2198	rs441051	7 94054000	Disturbances of amino-acid transport	270.1	Pulmonary function trait	45	1.591	0.0338
Core matrisome	Collagens	COL1A2	collagen, type I, alpha 2	2198	rs441051	7 94054000	Drug-resistant infection	041.9	Pulmonary function trait	150	0.7261	0.0341
Core matrisome	Collagens	COL1A2	collagen, type I, alpha 2	2198	rs441051	7 94054000	Disorders of function of stomach	536	Pulmonary function trait	906	0.876	0.035
Core matrisome	Collagens	COL1A2	collagen, type I, alpha 2	2198	rs441051	7 94054000	Methicillin sensitive Staphylococcus aureus	041.11	Pulmonary function trait	179	0.7497	0.03505
Core matrisome	Collagens	COL1A2	collagen, type I, alpha 2	2198	rs441051	7 94054000	Acquired toe deformities	735.2	Pulmonary function trait	758	1.147	0.03675
Core matrisome	Collagens	COL1A2	collagen, type I, alpha 2	2198	rs441051	7 94054000	Acquired spondylolisthesis	738.4	Pulmonary function trait	227	1.252	0.03724
Core matrisome	Collagens	COL1A2	collagen, type I, alpha 2	2198	rs441051	7 94054000	Speech and language disorder	315.2	Pulmonary function trait	133	1.327	0.038
Core matrisome	Collagens	COL1A2	collagen, type I, alpha 2	2198	rs441051	7 94054000	Corneal opacity	364.1	Pulmonary function trait	186	1.287	0.04051
Core matrisome	Collagens	COL1A2	collagen, type I, alpha 2	2198	rs441051	7 94054000	Disorders of conjunctiva	372	Pulmonary function trait	404	1.207	0.04227
Core matrisome	Collagens	COL1A2	collagen, type I, alpha 2	2198	rs441051	7 94054000	Hyperventilation	513.4	Pulmonary function trait	54	0.577	0.0436
Core matrisome	Collagens	COL1A2	collagen, type I, alpha 2	2198	rs441051	7 94054000	Disturbances of sulphur-bearing amino-acid metabolism	270.11	Pulmonary function trait	44	1.559	0.04521
Core matrisome	Collagens	COL1A2	collagen, type I, alpha 2	2198	rs441051	7 94054000	Staphylococcus infections	041.1	Pulmonary function trait	300	0.8124	0.04538
Core matrisome	Collagens	COL1A2	collagen, type I, alpha 2	2198	rs441051	7 94054000	Arterial embolism and thrombosis	444	Pulmonary function trait	383	1.197	0.04575
Core matrisome	Collagens	COL25A1	collagen, type XXV, alpha 1	18603	rs4956211	4	Diaphragmatic hernia	550.2	Systemic lupus erythematosus	1110	1.18	5.142e-4
Core matrisome	Collagens	COL25A1	collagen, type XXV, alpha 1	18603	rs4956211	4	Other disorders of the kidney and ureters	586	Systemic lupus erythematosus	1530	1.135	0.002258
Core matrisome	Collagens	COL25A1	collagen, type XXV, alpha 1	18603	rs4956211	4	Abdominal hernia	550	Systemic lupus erythematosus	2499	1.108	0.002864
Core matrisome	Collagens	COL25A1	collagen, type XXV, alpha 1	18603	rs4956211	4	Cancer of the digestive organs and peritoneum	159	Systemic lupus erythematosus	102	0.6225	0.002952
Core matrisome	Collagens	COL25A1	collagen, type XXV, alpha 1	18603	rs4956211	4	Blindness and low vision	367.9	Systemic lupus erythematosus	249	1.349	0.003104
Core matrisome	Collagens	COL25A1	collagen, type XXV, alpha 1	18603	rs4956211	4	Strabismus (not specified as paralytic)	378.1	Systemic lupus erythematosus	377	1.222	0.01096
Core matrisome	Collagens	COL25A1	collagen, type XXV, alpha 1	18603	rs4956211	4	Keratoconjunctivitis, noninfectious	371.5	Systemic lupus erythematosus	111	1.417	0.01099
Core matrisome	Collagens	COL25A1	collagen, type XXV, alpha 1	18603	rs4956211	4	Cancer of mouth	145	Systemic lupus erythematosus	86	0.6518	0.01323
Core matrisome	Collagens	COL25A1	collagen, type XXV, alpha 1	18603	rs4956211	4	Respiratory failure	509.1	Systemic lupus erythematosus	279	1.237	0.01457
Core matrisome	Collagens	COL25A1	collagen, type XXV, alpha 1	18603	rs4956211	4	Hodgkin's disease	201	Systemic lupus erythematosus	45	0.5476	0.01496
Core matrisome	Collagens	COL25A1	collagen, type XXV, alpha 1	18603	rs4956211	4	Elevated levels of transaminase or lactic acid dehydrogenase	573.91	Systemic lupus erythematosus	522	0.8441	0.01512
Core matrisome	Collagens	COL25A1	collagen, type XXV, alpha 1	18603	rs4956211	4	Fracture of neck of femur	800.1	Systemic lupus erythematosus	539	0.8402	0.01593
Core matrisome	Collagens	COL25A1	collagen, type XXV, alpha 1	18603	rs4956211	4	Herpes zoster with nervous system complications	053.1	Systemic lupus erythematosus	89	1.448	0.01699
Core matrisome	Collagens	COL25A1	collagen, type XXV, alpha 1	18603	rs4956211	4	Acute cystitis	592.11	Systemic lupus erythematosus	156	1.321	0.01893
Core matrisome	Collagens	COL25A1	collagen, type XXV, alpha 1	18603	rs4956211	4	Paralytic strabismus	378.5	Systemic lupus erythematosus	97	1.413	0.01904
Core matrisome	Collagens	COL25A1	collagen, type XXV, alpha 1	18603	rs4956211	4	Keratoconjunctivitis sicca	371.51	Systemic lupus erythematosus	70	1.494	0.01941
Core matrisome	Collagens	COL25A1	collagen, type XXV, alpha 1	18603	rs4956211	4	Valvular heart disease/ heart chambers	747.12	Systemic lupus erythematosus	48	0.5796	0.02045
Core matrisome	Collagens	COL25A1	collagen, type XXV, alpha 1	18603	rs4956211	4	Poisoning by hormones and synthetic substitutes	962	Systemic lupus erythematosus	159	1.308	0.02081
Core matrisome	Collagens	COL25A1	collagen, type XXV, alpha 1	18603	rs4956211	4	Mild cognitive impairment	292.2	Systemic lupus erythematosus	59	0.613	0.02189
Core matrisome	Collagens	COL25A1	collagen, type XXV, alpha 1	18603	rs4956211	4	Develomental delays and disorders	315	Systemic lupus erythematosus	261	1.224	0.0251
Core matrisome	Collagens	COL25A1	collagen, type XXV, alpha 1	18603	rs4956211	4	Fracture of lower limb	800	Systemic lupus erythematosus	987	0.8887	0.0251
Core matrisome	Collagens	COL25A1	collagen, type XXV, alpha 1	18603	rs4956211	4	Epiphora	375.2	Systemic lupus erythematosus	166	1.302	0.02539
Core matrisome	Collagens	COL25A1	collagen, type XXV, alpha 1	18603	rs4956211	4	Hallucinations	292.6	Systemic lupus erythematosus	42	1.632	0.026
Core matrisome	Collagens	COL25A1	collagen, type XXV, alpha 1	18603	rs4956211	4	Other disorders of testis	603	Systemic lupus erythematosus	201	0.752	0.02652
Core matrisome	Collagens	COL25A1	collagen, type XXV, alpha 1	18603	rs4956211	4	Dyshidrosis	705.1	Systemic lupus erythematosus	68	0.6489	0.02843
Core matrisome	Collagens	COL25A1	collagen, type XXV, alpha 1	18603	rs4956211	4	Emphysema	496.1	Systemic lupus erythematosus	283	1.214	0.02862
Core matrisome	Collagens	COL25A1	collagen, type XXV, alpha 1	18603	rs4956211	4	Adverse effects of hormones and synthetic substitutes	962.3	Systemic lupus erythematosus	25	1.838	0.0311
Core matrisome	Collagens	COL25A1	collagen, type XXV, alpha 1	18603	rs4956211	4	Pulmonary collapse; interstitial/compensatory emphysema	508	Systemic lupus erythematosus	684	0.879	0.03122
Core matrisome	Collagens	COL25A1	collagen, type XXV, alpha 1	18603	rs4956211	4	Chronic glomerulonephritis	580.14	Systemic lupus erythematosus	26	1.816	0.0321
Core matrisome	Collagens	COL25A1	collagen, type XXV, alpha 1	18603	rs4956211	4	Hepatomegaly	573.3	Systemic lupus erythematosus	49	0.6101	0.03273
Core matrisome	Collagens	COL25A1	collagen, type XXV, alpha 1	18603	rs4956211	4	Rosacea	695.3	Systemic lupus erythematosus	561	1.145	0.03287
Core matrisome	Collagens	COL25A1	collagen, type XXV, alpha 1	18603	rs4956211	4	Fracture of ribs	807	Systemic lupus erythematosus	346	0.8363	0.0332
Core matrisome	Collagens	COL25A1	collagen, type XXV, alpha 1	18603	rs4956211	4	Hydrocele	603.1	Systemic lupus erythematosus	125	0.7124	0.03391
Core matrisome	Collagens	COL25A1	collagen, type XXV, alpha 1	18603	rs4956211	4	Postlaminectomy syndrome	722.8	Systemic lupus erythematosus	137	1.3	0.03402
Core matrisome	Collagens	COL25A1	collagen, type XXV, alpha 1	18603	rs4956211	4	Breast conditions, congenital or relating to hormones	612	Systemic lupus erythematosus	208	0.7965	0.03404
Core matrisome	Collagens	COL25A1	collagen, type XXV, alpha 1	18603	rs4956211	4	Viral Enteritis	008.6	Systemic lupus erythematosus	99	1.351	0.03513
Core matrisome	Collagens	COL25A1	collagen, type XXV, alpha 1	18603	rs4956211	4	Amblyopia	368.1	Systemic lupus erythematosus	175	1.26	0.03524
Core matrisome	Collagens	COL25A1	collagen, type XXV, alpha 1	18603	rs4956211	4	Uterine leiomyoma	218.1	Systemic lupus erythematosus	407	0.8505	0.03588
Core matrisome	Collagens	COL25A1	collagen, type XXV, alpha 1	18603	rs4956211	4	Hypercoagulable state	286.8	Systemic lupus erythematosus	91	0.7132	0.03639
Core matrisome	Collagens	COL25A1	collagen, type XXV, alpha 1	18603	rs4956211	4	Mammographic microcalcification	611.11	Systemic lupus erythematosus	80	0.6977	0.03774
Core matrisome	Collagens	COL25A1	collagen, type XXV, alpha 1	18603	rs4956211	4	Bronchitis	497	Systemic lupus erythematosus	1449	0.9026	0.03833
Core matrisome	Collagens	COL25A1	collagen, type XXV, alpha 1	18603	rs4956211	4	Nonrheumatic aortic valve disorders	395.2	Systemic lupus erythematosus	814	0.8898	0.03854
Core matrisome	Collagens	COL25A1	collagen, type XXV, alpha 1	18603	rs4956211	4	Protein-calorie malnutrition	260	Systemic lupus erythematosus	690	0.8838	0.03862
Core matrisome	Collagens	COL25A1	collagen, type XXV, alpha 1	18603	rs4956211	4	Abnormal loss of weight and underweight	260.5	Systemic lupus erythematosus	266	0.8219	0.03969
Core matrisome	Collagens	COL25A1	collagen, type XXV, alpha 1	18603	rs4956211	4	Decreased white blood cell count	288.1	Systemic lupus erythematosus	398	0.8551	0.04312
Core matrisome	Collagens	COL25A1	collagen, type XXV, alpha 1	18603	rs4956211	4	Spinal stenosis	720	Systemic lupus erythematosus	1275	1.097	0.04355
Core matrisome	Collagens	COL25A1	collagen, type XXV, alpha 1	18603	rs4956211	4	Complications of gastrostomy, colostomy and enterostomy	536.7	Systemic lupus erythematosus	35	1.605	0.04773
Core matrisome	Collagens	COL25A1	collagen, type XXV, alpha 1	18603	rs4956211	4	Disorders of external ear	380	Systemic lupus erythematosus	63	1.428	0.04875
Core matrisome	Collagens	COL25A1	collagen, type XXV, alpha 1	18603	rs4956211	4	Polyarteritis nodosa and allied conditions	446	Systemic lupus erythematosus	184	1.233	0.04918
Core matrisome	Collagens	COL25A1	collagen, type XXV, alpha 1	18603	rs4956211	4	Glossodynia	529.6	Systemic lupus erythematosus	40	0.6073	0.04921
Core matrisome	Collagens	COL27A1	collagen, type XXVII, alpha 1	22986	rs946053	9 117049891	Seborrhea	706.3	Height	37	0.3765	2.741e-4
Core matrisome	Collagens	COL27A1	collagen, type XXVII, alpha 1	22986	rs946053	9 117049891	Fluid overload	276.6	Height	275	0.742	8.416e-4
Core matrisome	Collagens	COL27A1	collagen, type XXVII, alpha 1	22986	rs946053	9 117049891	Congenital musculoskeletal deformities of spine	754	Height	126	1.514	0.001307
Core matrisome	Collagens	COL27A1	collagen, type XXVII, alpha 1	22986	rs946053	9 117049891	Osteoporosis, NOS or other	743.1	Height	1752	0.8746	0.002235
Core matrisome	Collagens	COL27A1	collagen, type XXVII, alpha 1	22986	rs946053	9 117049891	Osteoporosis	743.11	Height	1659	0.8777	0.003762
Core matrisome	Collagens	COL27A1	collagen, type XXVII, alpha 1	22986	rs946053	9 117049891	Mitral valve stenosis and/or aortic valve stenosis	394.1	Height	407	0.8084	0.004574
Core matrisome	Collagens	COL27A1	collagen, type XXVII, alpha 1	22986	rs946053	9 117049891	Fracture of vertebral column without mention of spinal cord injury	805	Height	402	0.8104	0.004703
Core matrisome	Collagens	COL27A1	collagen, type XXVII, alpha 1	22986	rs946053	9 117049891	Exostosis of jaw	526.8	Height	32	0.4559	0.004839
Core matrisome	Collagens	COL27A1	collagen, type XXVII, alpha 1	22986	rs946053	9 117049891	H. pylori	041.8	Height	93	1.525	0.005032
Core matrisome	Collagens	COL27A1	collagen, type XXVII, alpha 1	22986	rs946053	9 117049891	Pyogenic granuloma	686.4	Height	43	1.837	0.006845
Core matrisome	Collagens	COL27A1	collagen, type XXVII, alpha 1	22986	rs946053	9 117049891	Concussion	817	Height	97	1.48	0.007585
Core matrisome	Collagens	COL27A1	collagen, type XXVII, alpha 1	22986	rs946053	9 117049891	Osteoporosis, osteopenia, & pathological fractures	743	Height	3276	0.9144	0.008773
Core matrisome	Collagens	COL27A1	collagen, type XXVII, alpha 1	22986	rs946053	9 117049891	Spondylolisthesis, congenital	754.2	Height	79	1.526	0.008994
Core matrisome	Collagens	COL27A1	collagen, type XXVII, alpha 1	22986	rs946053	9 117049891	Congenital anomalies of posterior segment of eye	753.2	Height	253	0.7835	0.009573
Core matrisome	Collagens	COL27A1	collagen, type XXVII, alpha 1	22986	rs946053	9 117049891	Breast cancer, including in situ	174.1	Height	695	1.163	0.009742
Core matrisome	Collagens	COL27A1	collagen, type XXVII, alpha 1	22986	rs946053	9 117049891	Anomalies of jaw size/symmetry	526.3	Height	31	2.027	0.009768
Core matrisome	Collagens	COL27A1	collagen, type XXVII, alpha 1	22986	rs946053	9 117049891	Pathologic fracture of vertebrae	743.21	Height	331	0.8069	0.01101
Core matrisome	Collagens	COL27A1	collagen, type XXVII, alpha 1	22986	rs946053	9 117049891	Cardiac pacemaker in situ	426.91	Height	506	0.8282	0.01121
Core matrisome	Collagens	COL27A1	collagen, type XXVII, alpha 1	22986	rs946053	9 117049891	Elevated blood pressure reading	402	Height	1773	0.8858	0.0124
Core matrisome	Collagens	COL27A1	collagen, type XXVII, alpha 1	22986	rs946053	9 117049891	Schizoid personality disorder	301.1	Height	58	1.624	0.01274
Core matrisome	Collagens	COL27A1	collagen, type XXVII, alpha 1	22986	rs946053	9 117049891	Antihypertensive agents causing adverse effects	972.6	Height	81	1.5	0.01276
Core matrisome	Collagens	COL27A1	collagen, type XXVII, alpha 1	22986	rs946053	9 117049891	Renal colic	594.8	Height	59	1.588	0.01401
Core matrisome	Collagens	COL27A1	collagen, type XXVII, alpha 1	22986	rs946053	9 117049891	Other specified peripheral vascular diseases	443.8	Height	32	1.882	0.01415
Core matrisome	Collagens	COL27A1	collagen, type XXVII, alpha 1	22986	rs946053	9 117049891	Adverse effects of cardiac rhythm regulators	972.1	Height	50	0.5943	0.01445
Core matrisome	Collagens	COL27A1	collagen, type XXVII, alpha 1	22986	rs946053	9 117049891	Memory loss	292.3	Height	381	1.208	0.01484
Core matrisome	Collagens	COL27A1	collagen, type XXVII, alpha 1	22986	rs946053	9 117049891	Cholesteatoma	385.3	Height	51	0.6018	0.01501
Core matrisome	Collagens	COL27A1	collagen, type XXVII, alpha 1	22986	rs946053	9 117049891	Nodular lymphoma	202.21	Height	69	1.505	0.01786
Core matrisome	Collagens	COL27A1	collagen, type XXVII, alpha 1	22986	rs946053	9 117049891	Acute cystitis	592.11	Height	156	1.337	0.01795
Core matrisome	Collagens	COL27A1	collagen, type XXVII, alpha 1	22986	rs946053	9 117049891	Chronic rheumatic disease of the heart valves	394	Height	860	0.8821	0.01922
Core matrisome	Collagens	COL27A1	collagen, type XXVII, alpha 1	22986	rs946053	9 117049891	Breast cancer	174	Height	705	1.145	0.01928
Core matrisome	Collagens	COL27A1	collagen, type XXVII, alpha 1	22986	rs946053	9 117049891	Breast cancer	174.11	Height	681	1.148	0.01929
Core matrisome	Collagens	COL27A1	collagen, type XXVII, alpha 1	22986	rs946053	9 117049891	Other disorders of bone and cartilage	733	Height	427	0.8458	0.01935
Core matrisome	Collagens	COL27A1	collagen, type XXVII, alpha 1	22986	rs946053	9 117049891	Other disorders of middle ear and mastoid	385	Height	110	0.7205	0.01945
Core matrisome	Collagens	COL27A1	collagen, type XXVII, alpha 1	22986	rs946053	9 117049891	Anomalies of pupillary function	379.4	Height	40	1.718	0.02012
Core matrisome	Collagens	COL27A1	collagen, type XXVII, alpha 1	22986	rs946053	9 117049891	Cardiac pacemaker/device in situ	426.9	Height	576	0.8514	0.02084
Core matrisome	Collagens	COL27A1	collagen, type XXVII, alpha 1	22986	rs946053	9 117049891	First degree AV block	426.21	Height	476	0.8345	0.02086
Core matrisome	Collagens	COL27A1	collagen, type XXVII, alpha 1	22986	rs946053	9 117049891	Benign neoplasm of skin	216	Height	2106	1.087	0.02145
Core matrisome	Collagens	COL27A1	collagen, type XXVII, alpha 1	22986	rs946053	9 117049891	Hypertensive chronic kidney disease	401.22	Height	736	0.8619	0.02344
Core matrisome	Collagens	COL27A1	collagen, type XXVII, alpha 1	22986	rs946053	9 117049891	Nonrheumatic tricuspid valve disorders	395.3	Height	114	0.7347	0.02454
Core matrisome	Collagens	COL27A1	collagen, type XXVII, alpha 1	22986	rs946053	9 117049891	Sleep related movement disorders	327.7	Height	336	0.8357	0.02471
Core matrisome	Collagens	COL27A1	collagen, type XXVII, alpha 1	22986	rs946053	9 117049891	Pervasive developmental disorders	313	Height	79	1.436	0.02503
Core matrisome	Collagens	COL27A1	collagen, type XXVII, alpha 1	22986	rs946053	9 117049891	Allergic reaction to food	930	Height	40	0.584	0.02511
Core matrisome	Collagens	COL27A1	collagen, type XXVII, alpha 1	22986	rs946053	9 117049891	Persistent mental disorders due to other conditions	290.3	Height	943	1.127	0.02554
Core matrisome	Collagens	COL27A1	collagen, type XXVII, alpha 1	22986	rs946053	9 117049891	Menopausal & postmenopausal disorders	627	Height	2744	1.105	0.02554
Core matrisome	Collagens	COL27A1	collagen, type XXVII, alpha 1	22986	rs946053	9 117049891	Dementia with cerebral degenerations	290.12	Height	82	1.438	0.02578
Core matrisome	Collagens	COL27A1	collagen, type XXVII, alpha 1	22986	rs946053	9 117049891	Benign neoplasm of thyroid glands	226	Height	46	1.6	0.0258
Core matrisome	Collagens	COL27A1	collagen, type XXVII, alpha 1	22986	rs946053	9 117049891	Hyperplasia of prostate	600	Height	2205	1.118	0.02605
Core matrisome	Collagens	COL27A1	collagen, type XXVII, alpha 1	22986	rs946053	9 117049891	Abnormal reflex	350.5	Height	26	0.5124	0.02606
Core matrisome	Collagens	COL27A1	collagen, type XXVII, alpha 1	22986	rs946053	9 117049891	Bronchitis	497	Height	1449	0.8976	0.02629
Core matrisome	Collagens	COL27A1	collagen, type XXVII, alpha 1	22986	rs946053	9 117049891	Hepatic cancer	155	Height	55	0.6421	0.02669
Core matrisome	Collagens	COL27A1	collagen, type XXVII, alpha 1	22986	rs946053	9 117049891	Open wounds of extremities	871	Height	1720	0.9131	0.02671
Core matrisome	Collagens	COL27A1	collagen, type XXVII, alpha 1	22986	rs946053	9 117049891	Gingival and periodontal diseases	523	Height	548	1.154	0.02699
Core matrisome	Collagens	COL27A1	collagen, type XXVII, alpha 1	22986	rs946053	9 117049891	Pilonidal cyst	686.3	Height	27	1.87	0.02711
Core matrisome	Collagens	COL27A1	collagen, type XXVII, alpha 1	22986	rs946053	9 117049891	Disease of tricuspid valve	394.7	Height	338	0.8333	0.0283
Core matrisome	Collagens	COL27A1	collagen, type XXVII, alpha 1	22986	rs946053	9 117049891	Dermatomycoses	110.2	Height	58	0.6544	0.02867
Core matrisome	Collagens	COL27A1	collagen, type XXVII, alpha 1	22986	rs946053	9 117049891	Type 2 diabetic neuropathy	250.24	Height	644	0.8787	0.0287
Core matrisome	Collagens	COL27A1	collagen, type XXVII, alpha 1	22986	rs946053	9 117049891	Keratoconjunctivitis sicca	371.51	Height	70	0.6793	0.03055
Core matrisome	Collagens	COL27A1	collagen, type XXVII, alpha 1	22986	rs946053	9 117049891	Delirium dementia and amnestic disorders	290	Height	1566	1.102	0.03069
Core matrisome	Collagens	COL27A1	collagen, type XXVII, alpha 1	22986	rs946053	9 117049891	Contracture of joint	739	Height	137	0.7671	0.03221
Core matrisome	Collagens	COL27A1	collagen, type XXVII, alpha 1	22986	rs946053	9 117049891	Congenital anomalies of genital organs	751.1	Height	34	1.701	0.03239
Core matrisome	Collagens	COL27A1	collagen, type XXVII, alpha 1	22986	rs946053	9 117049891	Redundant prepuce and phimosis/BXO	604.1	Height	70	0.6536	0.03242
Core matrisome	Collagens	COL27A1	collagen, type XXVII, alpha 1	22986	rs946053	9 117049891	Inflammation of eyelids	371.3	Height	2028	1.101	0.03345
Core matrisome	Collagens	COL27A1	collagen, type XXVII, alpha 1	22986	rs946053	9 117049891	Lupus erythematosus	695.41	Height	39	1.631	0.03386
Core matrisome	Collagens	COL27A1	collagen, type XXVII, alpha 1	22986	rs946053	9 117049891	Osteoarthritis; localized	740.1	Height	1645	1.093	0.03415
Core matrisome	Collagens	COL27A1	collagen, type XXVII, alpha 1	22986	rs946053	9 117049891	Pathologic fracture	743.2	Height	517	0.8652	0.03443
Core matrisome	Collagens	COL27A1	collagen, type XXVII, alpha 1	22986	rs946053	9 117049891	Paralytic strabismus	378.5	Height	97	0.7284	0.03461
Core matrisome	Collagens	COL27A1	collagen, type XXVII, alpha 1	22986	rs946053	9 117049891	Intracerebral hemorrhage	430.2	Height	70	0.6897	0.03475
Core matrisome	Collagens	COL27A1	collagen, type XXVII, alpha 1	22986	rs946053	9 117049891	Inflammatory conditions of jaw	526.5	Height	81	1.413	0.03602
Core matrisome	Collagens	COL27A1	collagen, type XXVII, alpha 1	22986	rs946053	9 117049891	Heart valve disorders	395	Height	1812	0.9241	0.03731
Core matrisome	Collagens	COL27A1	collagen, type XXVII, alpha 1	22986	rs946053	9 117049891	Chronic lymphocytic thyroiditis	245.2	Height	118	1.319	0.03749
Core matrisome	Collagens	COL27A1	collagen, type XXVII, alpha 1	22986	rs946053	9 117049891	Develomental delays and disorders	315	Height	261	1.204	0.03823
Core matrisome	Collagens	COL27A1	collagen, type XXVII, alpha 1	22986	rs946053	9 117049891	Inflammatory disease of cervix, vagina, and vulva	614.5	Height	660	0.8801	0.0386
Core matrisome	Collagens	COL27A1	collagen, type XXVII, alpha 1	22986	rs946053	9 117049891	Apnea	513.31	Height	34	1.671	0.03935
Core matrisome	Collagens	COL27A1	collagen, type XXVII, alpha 1	22986	rs946053	9 117049891	Benign neoplasm of other endocrine glands	227	Height	131	0.7715	0.03992
Core matrisome	Collagens	COL27A1	collagen, type XXVII, alpha 1	22986	rs946053	9 117049891	Hypertensive heart and/or renal disease	401.2	Height	972	0.8867	0.04093
Core matrisome	Collagens	COL27A1	collagen, type XXVII, alpha 1	22986	rs946053	9 117049891	Other disorders of back	724	Height	924	1.115	0.04181
Core matrisome	Collagens	COL27A1	collagen, type XXVII, alpha 1	22986	rs946053	9 117049891	Gross hematuria	593.1	Height	73	1.412	0.04193
Core matrisome	Collagens	COL27A1	collagen, type XXVII, alpha 1	22986	rs946053	9 117049891	CNS infection and poliomyelitis	324	Height	59	1.463	0.04195
Core matrisome	Collagens	COL27A1	collagen, type XXVII, alpha 1	22986	rs946053	9 117049891	Iatrogenic hypotension	458.2	Height	73	0.7099	0.0423
Core matrisome	Collagens	COL27A1	collagen, type XXVII, alpha 1	22986	rs946053	9 117049891	Osteopenia	743.9	Height	1796	0.9158	0.0435
Core matrisome	Collagens	COL27A1	collagen, type XXVII, alpha 1	22986	rs946053	9 117049891	Symptoms involving female genital tract	624	Height	167	0.7906	0.04418
Core matrisome	Collagens	COL27A1	collagen, type XXVII, alpha 1	22986	rs946053	9 117049891	Ankylosing spondylitis	715.2	Height	25	0.5387	0.04481
Core matrisome	Collagens	COL27A1	collagen, type XXVII, alpha 1	22986	rs946053	9 117049891	Atrophic gastritis	535.2	Height	103	1.331	0.04574
Core matrisome	Collagens	COL27A1	collagen, type XXVII, alpha 1	22986	rs946053	9 117049891	Viral hepatitis C	070.3	Height	96	0.7431	0.04576
Core matrisome	Collagens	COL27A1	collagen, type XXVII, alpha 1	22986	rs946053	9 117049891	Restless legs syndrome	327.71	Height	240	0.8297	0.04668
Core matrisome	Collagens	COL27A1	collagen, type XXVII, alpha 1	22986	rs946053	9 117049891	Nontoxic nodular goiter	241	Height	589	1.13	0.04721
Core matrisome	Collagens	COL27A1	collagen, type XXVII, alpha 1	22986	rs946053	9 117049891	Inflammatory diseases of female pelvic organs	614	Height	754	0.8909	0.0473
Core matrisome	Collagens	COL27A1	collagen, type XXVII, alpha 1	22986	rs946053	9 117049891	Periodontitis (acute or chronic)	523.3	Height	418	1.156	0.0474
Core matrisome	Collagens	COL27A1	collagen, type XXVII, alpha 1	22986	rs946053	9 117049891	Acute appendicitis	540.11	Height	98	0.7492	0.04909
Core matrisome	Collagens	COL27A1	collagen, type XXVII, alpha 1	22986	rs946053	9 117049891	Other cells and casts in urine	598.4	Height	141	1.291	0.04927
Core matrisome	Collagens	COL27A1	collagen, type XXVII, alpha 1	22986	rs946053	9 117049891	Secondary malignancy of lung	198.2	Height	140	1.268	0.04932
Core matrisome	Collagens	COL27A1	collagen, type XXVII, alpha 1	22986	rs946053	9 117049891	Spondylosis with myelopathy	721.2	Height	153	0.7951	0.04974
Core matrisome	Collagens	COL27A1	collagen, type XXVII, alpha 1	22986	rs946053	9 117049891	Insulin pump user	250.3	Height	316	0.8507	0.0498
Core matrisome	Collagens	COL27A1	collagen, type XXVII, alpha 1	22986	rs946053	9 117049891	Type 1 diabetes	250.1	Height	615	0.8895	0.04984
Core matrisome	Collagens	COL4A1	collagen, type IV, alpha 1	2202	rs3742207	13 110818598	Acquired hypothyroidism	244.2	Arterial stiffness (Pulse wave velocity)	45	2.168	3.432e-4
Core matrisome	Collagens	COL4A1	collagen, type IV, alpha 1	2202	rs3742207	13 110818598	Sprains and strains	840	Arterial stiffness (Pulse wave velocity)	2841	0.8705	4.313e-4
Core matrisome	Collagens	COL4A1	collagen, type IV, alpha 1	2202	rs3742207	13 110818598	Benign neoplasm of breast	610.4	Arterial stiffness (Pulse wave velocity)	78	1.672	0.001778
Core matrisome	Collagens	COL4A1	collagen, type IV, alpha 1	2202	rs3742207	13 110818598	Conjunctivitis, infectious	369.5	Arterial stiffness (Pulse wave velocity)	939	0.8312	0.002389
Core matrisome	Collagens	COL4A1	collagen, type IV, alpha 1	2202	rs3742207	13 110818598	Hematemesis	578.1	Arterial stiffness (Pulse wave velocity)	70	0.544	0.003172
Core matrisome	Collagens	COL4A1	collagen, type IV, alpha 1	2202	rs3742207	13 110818598	Abnormal function study of cardiovascular system	429.2	Arterial stiffness (Pulse wave velocity)	708	1.192	0.003793
Core matrisome	Collagens	COL4A1	collagen, type IV, alpha 1	2202	rs3742207	13 110818598	Rash and other nonspecific skin eruption	687.1	Arterial stiffness (Pulse wave velocity)	803	1.177	0.00397
Core matrisome	Collagens	COL4A1	collagen, type IV, alpha 1	2202	rs3742207	13 110818598	Other specified gastritis	535.8	Arterial stiffness (Pulse wave velocity)	301	1.283	0.004429
Core matrisome	Collagens	COL4A1	collagen, type IV, alpha 1	2202	rs3742207	13 110818598	Develomental delays and disorders	315	Arterial stiffness (Pulse wave velocity)	261	1.289	0.005762
Core matrisome	Collagens	COL4A1	collagen, type IV, alpha 1	2202	rs3742207	13 110818598	Subarachnoid hemorrhage (injury)	818.2	Arterial stiffness (Pulse wave velocity)	28	2.087	0.006277
Core matrisome	Collagens	COL4A1	collagen, type IV, alpha 1	2202	rs3742207	13 110818598	Prurigo	695.6	Arterial stiffness (Pulse wave velocity)	274	1.284	0.007022
Core matrisome	Collagens	COL4A1	collagen, type IV, alpha 1	2202	rs3742207	13 110818598	Type 1 diabetic ketoacidosis	250.11	Arterial stiffness (Pulse wave velocity)	127	0.6774	0.007385
Core matrisome	Collagens	COL4A1	collagen, type IV, alpha 1	2202	rs3742207	13 110818598	Poisoning by other anti-infectives	961	Arterial stiffness (Pulse wave velocity)	425	1.236	0.007399
Core matrisome	Collagens	COL4A1	collagen, type IV, alpha 1	2202	rs3742207	13 110818598	Lichen	695.7	Arterial stiffness (Pulse wave velocity)	88	1.507	0.007534
Core matrisome	Collagens	COL4A1	collagen, type IV, alpha 1	2202	rs3742207	13 110818598	Right bundle branch block	426.31	Arterial stiffness (Pulse wave velocity)	314	1.278	0.008204
Core matrisome	Collagens	COL4A1	collagen, type IV, alpha 1	2202	rs3742207	13 110818598	Circumscribed scleroderma	693	Arterial stiffness (Pulse wave velocity)	143	1.387	0.008327
Core matrisome	Collagens	COL4A1	collagen, type IV, alpha 1	2202	rs3742207	13 110818598	Other disorders of the nervous system	349	Arterial stiffness (Pulse wave velocity)	84	1.502	0.00958
Core matrisome	Collagens	COL4A1	collagen, type IV, alpha 1	2202	rs3742207	13 110818598	Inflammatory disease of breast	613.1	Arterial stiffness (Pulse wave velocity)	84	1.5	0.01076
Core matrisome	Collagens	COL4A1	collagen, type IV, alpha 1	2202	rs3742207	13 110818598	Kyphosis (acquired)	737.1	Arterial stiffness (Pulse wave velocity)	104	0.6649	0.01167
Core matrisome	Collagens	COL4A1	collagen, type IV, alpha 1	2202	rs3742207	13 110818598	Cerebral edema and compression of brain	348.2	Arterial stiffness (Pulse wave velocity)	39	1.761	0.01379
Core matrisome	Collagens	COL4A1	collagen, type IV, alpha 1	2202	rs3742207	13 110818598	Pain in joint	745	Arterial stiffness (Pulse wave velocity)	7301	0.9258	0.01443
Core matrisome	Collagens	COL4A1	collagen, type IV, alpha 1	2202	rs3742207	13 110818598	Calcaneal spur; Exostosis NOS	726.4	Arterial stiffness (Pulse wave velocity)	383	0.7985	0.01444
Core matrisome	Collagens	COL4A1	collagen, type IV, alpha 1	2202	rs3742207	13 110818598	Cystic kidney disease	751.21	Arterial stiffness (Pulse wave velocity)	75	0.6284	0.01498
Core matrisome	Collagens	COL4A1	collagen, type IV, alpha 1	2202	rs3742207	13 110818598	Sulfonamides	961.1	Arterial stiffness (Pulse wave velocity)	320	1.24	0.01544
Core matrisome	Collagens	COL4A1	collagen, type IV, alpha 1	2202	rs3742207	13 110818598	Paralytic strabismus	378.5	Arterial stiffness (Pulse wave velocity)	97	0.6663	0.01553
Core matrisome	Collagens	COL4A1	collagen, type IV, alpha 1	2202	rs3742207	13 110818598	Adverse drug events and drug allergies	979	Arterial stiffness (Pulse wave velocity)	727	1.154	0.01642
Core matrisome	Collagens	COL4A1	collagen, type IV, alpha 1	2202	rs3742207	13 110818598	Symptoms affecting skin	687	Arterial stiffness (Pulse wave velocity)	2982	1.087	0.01686
Core matrisome	Collagens	COL4A1	collagen, type IV, alpha 1	2202	rs3742207	13 110818598	Rosacea	695.3	Arterial stiffness (Pulse wave velocity)	561	1.167	0.01738
Core matrisome	Collagens	COL4A1	collagen, type IV, alpha 1	2202	rs3742207	13 110818598	Other disorders of eyelids	374	Arterial stiffness (Pulse wave velocity)	1407	0.8834	0.01913
Core matrisome	Collagens	COL4A1	collagen, type IV, alpha 1	2202	rs3742207	13 110818598	Temporomandibular joint disorder NOS	526.41	Arterial stiffness (Pulse wave velocity)	69	1.501	0.01959
Core matrisome	Collagens	COL4A1	collagen, type IV, alpha 1	2202	rs3742207	13 110818598	Type 2 diabetic retinopathy	250.23	Arterial stiffness (Pulse wave velocity)	498	0.8443	0.01978
Core matrisome	Collagens	COL4A1	collagen, type IV, alpha 1	2202	rs3742207	13 110818598	Allergic reaction to food	930	Arterial stiffness (Pulse wave velocity)	40	1.691	0.01985
Core matrisome	Collagens	COL4A1	collagen, type IV, alpha 1	2202	rs3742207	13 110818598	Effects of radiation NOS	990	Arterial stiffness (Pulse wave velocity)	102	1.394	0.02037
Core matrisome	Collagens	COL4A1	collagen, type IV, alpha 1	2202	rs3742207	13 110818598	Inflammatory bowel disease	555	Arterial stiffness (Pulse wave velocity)	197	1.275	0.02162
Core matrisome	Collagens	COL4A1	collagen, type IV, alpha 1	2202	rs3742207	13 110818598	Inflammation of eyelids	371.3	Arterial stiffness (Pulse wave velocity)	2028	0.8964	0.02304
Core matrisome	Collagens	COL4A1	collagen, type IV, alpha 1	2202	rs3742207	13 110818598	Benign neoplasm of respiratory and intrathoracic organs	212	Arterial stiffness (Pulse wave velocity)	49	1.583	0.0246
Core matrisome	Collagens	COL4A1	collagen, type IV, alpha 1	2202	rs3742207	13 110818598	Macular degeneration, wet	362.22	Arterial stiffness (Pulse wave velocity)	252	1.277	0.02501
Core matrisome	Collagens	COL4A1	collagen, type IV, alpha 1	2202	rs3742207	13 110818598	Cervical radiculitis	765	Arterial stiffness (Pulse wave velocity)	634	0.8651	0.02506
Core matrisome	Collagens	COL4A1	collagen, type IV, alpha 1	2202	rs3742207	13 110818598	Type 1 diabetes	250.1	Arterial stiffness (Pulse wave velocity)	615	0.8662	0.02516
Core matrisome	Collagens	COL4A1	collagen, type IV, alpha 1	2202	rs3742207	13 110818598	Back & neck sprains	841	Arterial stiffness (Pulse wave velocity)	2209	0.9056	0.02572
Core matrisome	Collagens	COL4A1	collagen, type IV, alpha 1	2202	rs3742207	13 110818598	Premature beats	427.6	Arterial stiffness (Pulse wave velocity)	775	1.153	0.02636
Core matrisome	Collagens	COL4A1	collagen, type IV, alpha 1	2202	rs3742207	13 110818598	Nonspecific findings on examination of blood	790	Arterial stiffness (Pulse wave velocity)	221	0.7878	0.02663
Core matrisome	Collagens	COL4A1	collagen, type IV, alpha 1	2202	rs3742207	13 110818598	Congenital anomalies of great vessels	747.13	Arterial stiffness (Pulse wave velocity)	34	1.716	0.0268
Core matrisome	Collagens	COL4A1	collagen, type IV, alpha 1	2202	rs3742207	13 110818598	Ulcerative colitis	555.2	Arterial stiffness (Pulse wave velocity)	110	1.36	0.02713
Core matrisome	Collagens	COL4A1	collagen, type IV, alpha 1	2202	rs3742207	13 110818598	Acute periodontitis	523.31	Arterial stiffness (Pulse wave velocity)	154	1.3	0.02774
Core matrisome	Collagens	COL4A1	collagen, type IV, alpha 1	2202	rs3742207	13 110818598	Poisoning by anticonvulsants and anti-Parkinsonism drugs	966	Arterial stiffness (Pulse wave velocity)	43	0.5633	0.02806
Core matrisome	Collagens	COL4A1	collagen, type IV, alpha 1	2202	rs3742207	13 110818598	Curvature of spine	737	Arterial stiffness (Pulse wave velocity)	353	0.8283	0.02836
Core matrisome	Collagens	COL4A1	collagen, type IV, alpha 1	2202	rs3742207	13 110818598	Erythematous conditions	695	Arterial stiffness (Pulse wave velocity)	1405	1.104	0.02885
Core matrisome	Collagens	COL4A1	collagen, type IV, alpha 1	2202	rs3742207	13 110818598	Lesions of stomach and duodenum	537.1	Arterial stiffness (Pulse wave velocity)	34	1.698	0.02977
Core matrisome	Collagens	COL4A1	collagen, type IV, alpha 1	2202	rs3742207	13 110818598	Degeneration of intervertebral disc	722.6	Arterial stiffness (Pulse wave velocity)	1656	0.9116	0.03313
Core matrisome	Collagens	COL4A1	collagen, type IV, alpha 1	2202	rs3742207	13 110818598	Peyronie's disease	604.3	Arterial stiffness (Pulse wave velocity)	44	1.599	0.03521
Core matrisome	Collagens	COL4A1	collagen, type IV, alpha 1	2202	rs3742207	13 110818598	Conductive hearing loss	389.2	Arterial stiffness (Pulse wave velocity)	85	0.6941	0.03648
Core matrisome	Collagens	COL4A1	collagen, type IV, alpha 1	2202	rs3742207	13 110818598	progressive myopia	360.2	Arterial stiffness (Pulse wave velocity)	50	0.613	0.0377
Core matrisome	Collagens	COL4A1	collagen, type IV, alpha 1	2202	rs3742207	13 110818598	Peripheral vascular disease	443	Arterial stiffness (Pulse wave velocity)	1870	1.092	0.03832
Core matrisome	Collagens	COL4A1	collagen, type IV, alpha 1	2202	rs3742207	13 110818598	Acute pericarditis	420.21	Arterial stiffness (Pulse wave velocity)	29	0.5121	0.03948
Core matrisome	Collagens	COL4A1	collagen, type IV, alpha 1	2202	rs3742207	13 110818598	Pseudomonal pneumonia	480.12	Arterial stiffness (Pulse wave velocity)	25	1.8	0.04024
Core matrisome	Collagens	COL4A1	collagen, type IV, alpha 1	2202	rs3742207	13 110818598	Elevated C-reactive protein	790.8	Arterial stiffness (Pulse wave velocity)	36	0.5577	0.04078
Core matrisome	Collagens	COL4A1	collagen, type IV, alpha 1	2202	rs3742207	13 110818598	Other specified peripheral vascular diseases	443.8	Arterial stiffness (Pulse wave velocity)	32	1.691	0.04081
Core matrisome	Collagens	COL4A1	collagen, type IV, alpha 1	2202	rs3742207	13 110818598	Cervicitis and endocervicitis	614.51	Arterial stiffness (Pulse wave velocity)	72	1.413	0.04085
Core matrisome	Collagens	COL4A1	collagen, type IV, alpha 1	2202	rs3742207	13 110818598	Lymphosarcoma	202.23	Arterial stiffness (Pulse wave velocity)	29	1.715	0.04146
Core matrisome	Collagens	COL4A1	collagen, type IV, alpha 1	2202	rs3742207	13 110818598	Muscle weakness	772.3	Arterial stiffness (Pulse wave velocity)	227	0.8096	0.04421
Core matrisome	Collagens	COL4A1	collagen, type IV, alpha 1	2202	rs3742207	13 110818598	Gout and other crystal arthropathies	274	Arterial stiffness (Pulse wave velocity)	904	0.8974	0.0449
Core matrisome	Collagens	COL4A1	collagen, type IV, alpha 1	2202	rs3742207	13 110818598	Otitis externa	380.1	Arterial stiffness (Pulse wave velocity)	571	1.14	0.04675
Core matrisome	Collagens	COL4A1	collagen, type IV, alpha 1	2202	rs3742207	13 110818598	Hemorrhage of rectum and anus	578.8	Arterial stiffness (Pulse wave velocity)	526	0.8704	0.04791
Core matrisome	Collagens	COL4A1	collagen, type IV, alpha 1	2202	rs3742207	13 110818598	Blindness and low vision	367.9	Arterial stiffness (Pulse wave velocity)	249	0.8138	0.04942
Core matrisome	Collagens	COL4A2	collagen, type IV, alpha 2	2203	rs7319311	13 111030578	Poisoning by anticonvulsants and anti-Parkinsonism drugs	966	Bipolar disorder and schizophrenia	43	2.455	4.971e-5
Core matrisome	Collagens	COL4A2	collagen, type IV, alpha 2	2203	rs7319311	13 111030578	Hepatic cancer	155	Bipolar disorder and schizophrenia	55	0.4271	8.728e-4
Core matrisome	Collagens	COL4A2	collagen, type IV, alpha 2	2203	rs7319311	13 111030578	Deviated nasal septum	470	Bipolar disorder and schizophrenia	706	0.8128	0.002235
Core matrisome	Collagens	COL4A2	collagen, type IV, alpha 2	2203	rs7319311	13 111030578	Scoliosis	737.3	Bipolar disorder and schizophrenia	229	1.35	0.002482
Core matrisome	Collagens	COL4A2	collagen, type IV, alpha 2	2203	rs7319311	13 111030578	Gangrene	791	Bipolar disorder and schizophrenia	66	0.5192	0.002642
Core matrisome	Collagens	COL4A2	collagen, type IV, alpha 2	2203	rs7319311	13 111030578	Thyroid cancer	193	Bipolar disorder and schizophrenia	94	1.555	0.003259
Core matrisome	Collagens	COL4A2	collagen, type IV, alpha 2	2203	rs7319311	13 111030578	Disorders of muscle, ligament, and fascia	728	Bipolar disorder and schizophrenia	1031	1.184	0.00329
Core matrisome	Collagens	COL4A2	collagen, type IV, alpha 2	2203	rs7319311	13 111030578	Urinary incontinence	599.4	Bipolar disorder and schizophrenia	1353	0.8671	0.003716
Core matrisome	Collagens	COL4A2	collagen, type IV, alpha 2	2203	rs7319311	13 111030578	Anaphylactic shock NOS	946	Bipolar disorder and schizophrenia	99	0.6098	0.003913
Core matrisome	Collagens	COL4A2	collagen, type IV, alpha 2	2203	rs7319311	13 111030578	Fasciitis	728.7	Bipolar disorder and schizophrenia	974	1.173	0.006642
Core matrisome	Collagens	COL4A2	collagen, type IV, alpha 2	2203	rs7319311	13 111030578	Hyperglyceridemia	272.12	Bipolar disorder and schizophrenia	492	1.254	0.007818
Core matrisome	Collagens	COL4A2	collagen, type IV, alpha 2	2203	rs7319311	13 111030578	Lipoid metabolism disorder NOS	272.9	Bipolar disorder and schizophrenia	598	1.28	0.008093
Core matrisome	Collagens	COL4A2	collagen, type IV, alpha 2	2203	rs7319311	13 111030578	Noninfectious disorders of lymphatic channels	450	Bipolar disorder and schizophrenia	192	1.326	0.008254
Core matrisome	Collagens	COL4A2	collagen, type IV, alpha 2	2203	rs7319311	13 111030578	Pituitary hyperfunction	253.1	Bipolar disorder and schizophrenia	28	0.3862	0.009345
Core matrisome	Collagens	COL4A2	collagen, type IV, alpha 2	2203	rs7319311	13 111030578	Anxiety, phobic and dissociative disorders	300	Bipolar disorder and schizophrenia	2477	0.9032	0.009362
Core matrisome	Collagens	COL4A2	collagen, type IV, alpha 2	2203	rs7319311	13 111030578	Conductive hearing loss	389.2	Bipolar disorder and schizophrenia	85	1.503	0.0097
Core matrisome	Collagens	COL4A2	collagen, type IV, alpha 2	2203	rs7319311	13 111030578	Symptoms involving urinary system	599.8	Bipolar disorder and schizophrenia	343	0.7963	0.0127
Core matrisome	Collagens	COL4A2	collagen, type IV, alpha 2	2203	rs7319311	13 111030578	Iatrogenic hypothyroidism	244.1	Bipolar disorder and schizophrenia	188	1.308	0.01325
Core matrisome	Collagens	COL4A2	collagen, type IV, alpha 2	2203	rs7319311	13 111030578	Empyema and pneumothorax	506	Bipolar disorder and schizophrenia	228	1.278	0.01354
Core matrisome	Collagens	COL4A2	collagen, type IV, alpha 2	2203	rs7319311	13 111030578	Other rheumatic heart disease	420.4	Bipolar disorder and schizophrenia	34	0.4634	0.01379
Core matrisome	Collagens	COL4A2	collagen, type IV, alpha 2	2203	rs7319311	13 111030578	Failure to thrive	264.2	Bipolar disorder and schizophrenia	144	1.361	0.01492
Core matrisome	Collagens	COL4A2	collagen, type IV, alpha 2	2203	rs7319311	13 111030578	Ingrowing nail	703.1	Bipolar disorder and schizophrenia	793	0.8678	0.01691
Core matrisome	Collagens	COL4A2	collagen, type IV, alpha 2	2203	rs7319311	13 111030578	Poisoning by primarily systemic agents	963	Bipolar disorder and schizophrenia	217	1.281	0.01691
Core matrisome	Collagens	COL4A2	collagen, type IV, alpha 2	2203	rs7319311	13 111030578	Chronic interstitial cystitis	592.13	Bipolar disorder and schizophrenia	29	1.895	0.01768
Core matrisome	Collagens	COL4A2	collagen, type IV, alpha 2	2203	rs7319311	13 111030578	Adverse effects of antineoplastic and immunosuppressive drugs	963.1	Bipolar disorder and schizophrenia	205	1.283	0.01903
Core matrisome	Collagens	COL4A2	collagen, type IV, alpha 2	2203	rs7319311	13 111030578	Paget's disease of bone	731.1	Bipolar disorder and schizophrenia	27	0.4263	0.01957
Core matrisome	Collagens	COL4A2	collagen, type IV, alpha 2	2203	rs7319311	13 111030578	Elevated C-reactive protein	790.8	Bipolar disorder and schizophrenia	36	1.765	0.01959
Core matrisome	Collagens	COL4A2	collagen, type IV, alpha 2	2203	rs7319311	13 111030578	Carbohydrate transport and metabolism disorder	271	Bipolar disorder and schizophrenia	668	0.8623	0.02095
Core matrisome	Collagens	COL4A2	collagen, type IV, alpha 2	2203	rs7319311	13 111030578	Systemic lupus erythematosus	695.42	Bipolar disorder and schizophrenia	98	1.406	0.02303
Core matrisome	Collagens	COL4A2	collagen, type IV, alpha 2	2203	rs7319311	13 111030578	Disaccharide malabsorption	271.3	Bipolar disorder and schizophrenia	656	0.8635	0.02324
Core matrisome	Collagens	COL4A2	collagen, type IV, alpha 2	2203	rs7319311	13 111030578	Influenza	481	Bipolar disorder and schizophrenia	195	1.283	0.02365
Core matrisome	Collagens	COL4A2	collagen, type IV, alpha 2	2203	rs7319311	13 111030578	Urethral stricture (not specified as infectious)	597.1	Bipolar disorder and schizophrenia	124	0.7178	0.02449
Core matrisome	Collagens	COL4A2	collagen, type IV, alpha 2	2203	rs7319311	13 111030578	Discoid lupus erythematosus	695.4	Bipolar disorder and schizophrenia	112	1.372	0.02454
Core matrisome	Collagens	COL4A2	collagen, type IV, alpha 2	2203	rs7319311	13 111030578	AV block	426.2	Bipolar disorder and schizophrenia	759	1.163	0.02596
Core matrisome	Collagens	COL4A2	collagen, type IV, alpha 2	2203	rs7319311	13 111030578	Disturbance of skin sensation	687.4	Bipolar disorder and schizophrenia	1661	0.9042	0.02646
Core matrisome	Collagens	COL4A2	collagen, type IV, alpha 2	2203	rs7319311	13 111030578	Cervicocranial/Cervicobrachial syndrome	767	Bipolar disorder and schizophrenia	321	1.214	0.02696
Core matrisome	Collagens	COL4A2	collagen, type IV, alpha 2	2203	rs7319311	13 111030578	Diseases of hair and hair follicles	704	Bipolar disorder and schizophrenia	413	0.8392	0.02729
Core matrisome	Collagens	COL4A2	collagen, type IV, alpha 2	2203	rs7319311	13 111030578	Curvature of spine	737	Bipolar disorder and schizophrenia	353	1.197	0.02834
Core matrisome	Collagens	COL4A2	collagen, type IV, alpha 2	2203	rs7319311	13 111030578	Symptoms affecting skin	687	Bipolar disorder and schizophrenia	2982	0.925	0.02937
Core matrisome	Collagens	COL4A2	collagen, type IV, alpha 2	2203	rs7319311	13 111030578	Inflammatory diseases of prostate	601	Bipolar disorder and schizophrenia	522	1.191	0.03005
Core matrisome	Collagens	COL4A2	collagen, type IV, alpha 2	2203	rs7319311	13 111030578	Hypocalcemia	275.51	Bipolar disorder and schizophrenia	117	1.344	0.0307
Core matrisome	Collagens	COL4A2	collagen, type IV, alpha 2	2203	rs7319311	13 111030578	Prolapse of vaginal vault after hysterectomy	618.5	Bipolar disorder and schizophrenia	102	0.7031	0.03185
Core matrisome	Collagens	COL4A2	collagen, type IV, alpha 2	2203	rs7319311	13 111030578	Iatrogenic hypotension	458.2	Bipolar disorder and schizophrenia	73	0.6593	0.03244
Core matrisome	Collagens	COL4A2	collagen, type IV, alpha 2	2203	rs7319311	13 111030578	Hirsutism	704.2	Bipolar disorder and schizophrenia	62	0.6374	0.03282
Core matrisome	Collagens	COL4A2	collagen, type IV, alpha 2	2203	rs7319311	13 111030578	Hodgkin's disease	201	Bipolar disorder and schizophrenia	45	1.576	0.03361
Core matrisome	Collagens	COL4A2	collagen, type IV, alpha 2	2203	rs7319311	13 111030578	Heartburn	533	Bipolar disorder and schizophrenia	160	1.293	0.03369
Core matrisome	Collagens	COL4A2	collagen, type IV, alpha 2	2203	rs7319311	13 111030578	Lower gastrointestinal congenital anomalies	750.2	Bipolar disorder and schizophrenia	41	1.609	0.03495
Core matrisome	Collagens	COL4A2	collagen, type IV, alpha 2	2203	rs7319311	13 111030578	Angiodysplasia of intestine	556.11	Bipolar disorder and schizophrenia	31	1.752	0.03499
Core matrisome	Collagens	COL4A2	collagen, type IV, alpha 2	2203	rs7319311	13 111030578	Dystrophy of female genital tract	624.1	Bipolar disorder and schizophrenia	34	0.5294	0.0357
Core matrisome	Collagens	COL4A2	collagen, type IV, alpha 2	2203	rs7319311	13 111030578	Carditis	420	Bipolar disorder and schizophrenia	362	0.8385	0.03584
Core matrisome	Collagens	COL4A2	collagen, type IV, alpha 2	2203	rs7319311	13 111030578	Noninfectious gastroenteritis	558	Bipolar disorder and schizophrenia	1035	0.8859	0.03598
Core matrisome	Collagens	COL4A2	collagen, type IV, alpha 2	2203	rs7319311	13 111030578	Hemoptysis	516.1	Bipolar disorder and schizophrenia	183	1.258	0.03988
Core matrisome	Collagens	COL4A2	collagen, type IV, alpha 2	2203	rs7319311	13 111030578	Chronic lymphocytic thyroiditis	245.2	Bipolar disorder and schizophrenia	118	0.738	0.04163
Core matrisome	Collagens	COL4A2	collagen, type IV, alpha 2	2203	rs7319311	13 111030578	Mood disorders	296	Bipolar disorder and schizophrenia	2802	0.9291	0.04249
Core matrisome	Collagens	COL4A2	collagen, type IV, alpha 2	2203	rs7319311	13 111030578	Decreased white blood cell count	288.1	Bipolar disorder and schizophrenia	398	1.167	0.0436
Core matrisome	Collagens	COL4A2	collagen, type IV, alpha 2	2203	rs7319311	13 111030578	Blindness and low vision	367.9	Bipolar disorder and schizophrenia	249	0.8063	0.0443
Core matrisome	Collagens	COL4A2	collagen, type IV, alpha 2	2203	rs7319311	13 111030578	E. coli	041.4	Bipolar disorder and schizophrenia	201	1.24	0.04577
Core matrisome	Collagens	COL4A2	collagen, type IV, alpha 2	2203	rs7319311	13 111030578	Functional digestive disorders	564	Bipolar disorder and schizophrenia	1284	0.9003	0.04592
Core matrisome	Collagens	COL4A2	collagen, type IV, alpha 2	2203	rs7319311	13 111030578	Mycoses	117	Bipolar disorder and schizophrenia	80	1.388	0.04642
Core matrisome	Collagens	COL4A2	collagen, type IV, alpha 2	2203	rs7319311	13 111030578	Contact and allergic dermatitis of eyelid	939.1	Bipolar disorder and schizophrenia	50	1.513	0.04775
Core matrisome	Collagens	COL4A2	collagen, type IV, alpha 2	2203	rs7319311	13 111030578	Pelvic peritoneal adhesions, female (postoperative) (postinfection)	614.1	Bipolar disorder and schizophrenia	25	0.4974	0.0482
Core matrisome	Collagens	COL4A2	collagen, type IV, alpha 2	2203	rs7319311	13 111030578	Adverse effects of sedatives or other central nervous system depressants and anesthetics	967	Bipolar disorder and schizophrenia	73	1.413	0.0484
Core matrisome	Collagens	COL4A2	collagen, type IV, alpha 2	2203	rs7319311	13 111030578	Other disorders of adrenal glands	255.9	Bipolar disorder and schizophrenia	88	0.7095	0.04899
Core matrisome	Collagens	COL4A2	collagen, type IV, alpha 2	2203	rs7319311	13 111030578	Ulceration of the lower GI tract	556	Bipolar disorder and schizophrenia	82	1.384	0.04902
Core matrisome	Collagens	COL4A2	collagen, type IV, alpha 2	2203	rs7319311	13 111030578	Enthesopathy	726.1	Bipolar disorder and schizophrenia	2495	1.088	0.04907
Core matrisome	Collagens	COL5A1	collagen, type V, alpha 1	2209	rs7044529	9 137568051	Cardiac complications, not elsewhere classified	429.9	Central corneal thickness	153	1.626	0.001145
Core matrisome	Collagens	COL5A1	collagen, type V, alpha 1	2209	rs7044529	9 137568051	Elevated prostate specific antigen	796	Central corneal thickness	840	0.7345	0.001577
Core matrisome	Collagens	COL5A1	collagen, type V, alpha 1	2209	rs7044529	9 137568051	Unstable angina (intermediate coronary syndrome)	411.1	Central corneal thickness	836	1.235	0.004629
Core matrisome	Collagens	COL5A1	collagen, type V, alpha 1	2209	rs7044529	9 137568051	Chronic obstructive asthma	495.1	Central corneal thickness	253	1.376	0.006545
Core matrisome	Collagens	COL5A1	collagen, type V, alpha 1	2209	rs7044529	9 137568051	Sprains and strains	840	Central corneal thickness	2841	0.8702	0.008993
Core matrisome	Collagens	COL5A1	collagen, type V, alpha 1	2209	rs7044529	9 137568051	Mastodynia	613.5	Central corneal thickness	311	0.7025	0.009758
Core matrisome	Collagens	COL5A1	collagen, type V, alpha 1	2209	rs7044529	9 137568051	Hypotension	458	Central corneal thickness	1167	1.17	0.0113
Core matrisome	Collagens	COL5A1	collagen, type V, alpha 1	2209	rs7044529	9 137568051	Open wounds of extremities	871	Central corneal thickness	1720	0.8622	0.01165
Core matrisome	Collagens	COL5A1	collagen, type V, alpha 1	2209	rs7044529	9 137568051	Renal osteodystrophy	588.1	Central corneal thickness	92	0.5096	0.01283
Core matrisome	Collagens	COL5A1	collagen, type V, alpha 1	2209	rs7044529	9 137568051	Alopecia Areata	704.11	Central corneal thickness	31	2.048	0.0144
Core matrisome	Collagens	COL5A1	collagen, type V, alpha 1	2209	rs7044529	9 137568051	Disease of capillaries	448	Central corneal thickness	174	0.6392	0.01475
Core matrisome	Collagens	COL5A1	collagen, type V, alpha 1	2209	rs7044529	9 137568051	Jaw disease NOS	526.9	Central corneal thickness	89	1.563	0.0155
Core matrisome	Collagens	COL5A1	collagen, type V, alpha 1	2209	rs7044529	9 137568051	Myocardial infarction	411.2	Central corneal thickness	1382	1.16	0.01631
Core matrisome	Collagens	COL5A1	collagen, type V, alpha 1	2209	rs7044529	9 137568051	Keratitis	370	Central corneal thickness	243	0.6965	0.01666
Core matrisome	Collagens	COL5A1	collagen, type V, alpha 1	2209	rs7044529	9 137568051	Ingrowing nail	703.1	Central corneal thickness	793	0.8248	0.01669
Core matrisome	Collagens	COL5A1	collagen, type V, alpha 1	2209	rs7044529	9 137568051	Anisometropia	368.3	Central corneal thickness	221	0.6863	0.01723
Core matrisome	Collagens	COL5A1	collagen, type V, alpha 1	2209	rs7044529	9 137568051	Migraine	340	Central corneal thickness	744	0.8174	0.01796
Core matrisome	Collagens	COL5A1	collagen, type V, alpha 1	2209	rs7044529	9 137568051	Musculoskeletal symptoms referable to limbs	771	Central corneal thickness	314	1.293	0.01801
Core matrisome	Collagens	COL5A1	collagen, type V, alpha 1	2209	rs7044529	9 137568051	Arterial embolism and thrombosis of lower extremity artery	444.1	Central corneal thickness	184	1.4	0.01945
Core matrisome	Collagens	COL5A1	collagen, type V, alpha 1	2209	rs7044529	9 137568051	Erectile dysfunction	605	Central corneal thickness	1098	0.8245	0.02039
Core matrisome	Collagens	COL5A1	collagen, type V, alpha 1	2209	rs7044529	9 137568051	Cardiomyopathy	425	Central corneal thickness	579	1.209	0.02087
Core matrisome	Collagens	COL5A1	collagen, type V, alpha 1	2209	rs7044529	9 137568051	Primary/intrinsic cardiomyopathies	425.1	Central corneal thickness	546	1.215	0.02135
Core matrisome	Collagens	COL5A1	collagen, type V, alpha 1	2209	rs7044529	9 137568051	Angina pectoris	411.3	Central corneal thickness	1362	1.153	0.02209
Core matrisome	Collagens	COL5A1	collagen, type V, alpha 1	2209	rs7044529	9 137568051	Arthralgia/ankylosis of temporomandibular joint	526.42	Central corneal thickness	75	0.5045	0.02427
Core matrisome	Collagens	COL5A1	collagen, type V, alpha 1	2209	rs7044529	9 137568051	Respiratory insufficiency	509.2	Central corneal thickness	236	0.7148	0.02469
Core matrisome	Collagens	COL5A1	collagen, type V, alpha 1	2209	rs7044529	9 137568051	Rotator cuff (capsule) sprain	840.2	Central corneal thickness	568	0.8047	0.02585
Core matrisome	Collagens	COL5A1	collagen, type V, alpha 1	2209	rs7044529	9 137568051	Orthostatic hypotension	458.1	Central corneal thickness	461	1.232	0.02663
Core matrisome	Collagens	COL5A1	collagen, type V, alpha 1	2209	rs7044529	9 137568051	Anorexia	260.6	Central corneal thickness	167	0.6709	0.02798
Core matrisome	Collagens	COL5A1	collagen, type V, alpha 1	2209	rs7044529	9 137568051	Eosinophilia	288.3	Central corneal thickness	44	1.74	0.03094
Core matrisome	Collagens	COL5A1	collagen, type V, alpha 1	2209	rs7044529	9 137568051	Migrain with aura	340.1	Central corneal thickness	109	0.5991	0.0313
Core matrisome	Collagens	COL5A1	collagen, type V, alpha 1	2209	rs7044529	9 137568051	Other nonmalignant breast conditions	613	Central corneal thickness	1077	0.8476	0.03267
Core matrisome	Collagens	COL5A1	collagen, type V, alpha 1	2209	rs7044529	9 137568051	Adrenal hyperfunction	255.1	Central corneal thickness	42	1.749	0.03299
Core matrisome	Collagens	COL5A1	collagen, type V, alpha 1	2209	rs7044529	9 137568051	End stage renal disease	585.32	Central corneal thickness	132	0.6426	0.0333
Core matrisome	Collagens	COL5A1	collagen, type V, alpha 1	2209	rs7044529	9 137568051	Other disorders of soft tissues	729	Central corneal thickness	152	0.662	0.03361
Core matrisome	Collagens	COL5A1	collagen, type V, alpha 1	2209	rs7044529	9 137568051	Polymyalgia Rheumatica	717	Central corneal thickness	273	0.751	0.03456
Core matrisome	Collagens	COL5A1	collagen, type V, alpha 1	2209	rs7044529	9 137568051	Pulmonary congestion and hypostasis	503	Central corneal thickness	162	1.369	0.03466
Core matrisome	Collagens	COL5A1	collagen, type V, alpha 1	2209	rs7044529	9 137568051	Neoplasm of unspecified nature of digestive system	158	Central corneal thickness	123	1.406	0.03485
Core matrisome	Collagens	COL5A1	collagen, type V, alpha 1	2209	rs7044529	9 137568051	Other specified diseases of nail	703.8	Central corneal thickness	939	0.8532	0.035
Core matrisome	Collagens	COL5A1	collagen, type V, alpha 1	2209	rs7044529	9 137568051	Liver replaced by transplant	573.2	Central corneal thickness	28	1.917	0.03553
Core matrisome	Collagens	COL5A1	collagen, type V, alpha 1	2209	rs7044529	9 137568051	Cancer of larynx	149.4	Central corneal thickness	101	1.45	0.03593
Core matrisome	Collagens	COL5A1	collagen, type V, alpha 1	2209	rs7044529	9 137568051	Open wound of finger(s)	871.2	Central corneal thickness	761	0.837	0.03664
Core matrisome	Collagens	COL5A1	collagen, type V, alpha 1	2209	rs7044529	9 137568051	Osteoarthritis; localized	740.1	Central corneal thickness	1645	0.8812	0.03706
Core matrisome	Collagens	COL5A1	collagen, type V, alpha 1	2209	rs7044529	9 137568051	Contact dermatitis and other eczema due to plants [except food]	931	Central corneal thickness	52	0.4597	0.03797
Core matrisome	Collagens	COL5A1	collagen, type V, alpha 1	2209	rs7044529	9 137568051	Endometrial hyperplasia	621	Central corneal thickness	118	1.411	0.03917
Core matrisome	Collagens	COL5A1	collagen, type V, alpha 1	2209	rs7044529	9 137568051	Other upper respiratory disease	479	Central corneal thickness	1057	1.161	0.04097
Core matrisome	Collagens	COL5A1	collagen, type V, alpha 1	2209	rs7044529	9 137568051	Other dermatoses	702	Central corneal thickness	4203	0.9102	0.04099
Core matrisome	Collagens	COL5A1	collagen, type V, alpha 1	2209	rs7044529	9 137568051	Non-Hodgkins lymphoma	202.2	Central corneal thickness	252	0.7504	0.04177
Core matrisome	Collagens	COL5A1	collagen, type V, alpha 1	2209	rs7044529	9 137568051	Diseases of nail	703	Central corneal thickness	994	0.8641	0.04564
Core matrisome	Collagens	COL5A1	collagen, type V, alpha 1	2209	rs7044529	9 137568051	Exostosis of jaw	526.8	Central corneal thickness	32	1.803	0.04711
Core matrisome	Collagens	COL5A1	collagen, type V, alpha 1	2209	rs7044529	9 137568051	Intervertebral disc disorder with myelopathy	722.7	Central corneal thickness	52	0.4828	0.048
Core matrisome	Collagens	COL5A1	collagen, type V, alpha 1	2209	rs7044529	9 137568051	Fracture of pelvis	802	Central corneal thickness	185	1.316	0.04835
Core matrisome	Collagens	COL5A1	collagen, type V, alpha 1	2209	rs7044529	9 137568051	Speech and language disorder	315.2	Central corneal thickness	133	1.371	0.04916
Core matrisome	ECM Glycoproteins	ADIPOQ	adiponectin, C1Q and collagen domain containing	13633	rs1648707	3 186551711	Other disorders of stomach and duodenum	537	Adiponectin levels	270	0.6927	2.897e-4
Core matrisome	ECM Glycoproteins	ADIPOQ	adiponectin, C1Q and collagen domain containing	13633	rs266717	3 186530484	Contracture of joint	739	Adiponectin levels	137	0.6469	5.023e-4
Core matrisome	ECM Glycoproteins	ADIPOQ	adiponectin, C1Q and collagen domain containing	13633	rs1648707	3 186551711	severe protein-calorie malnutrition	260.2	Adiponectin levels	81	0.5404	0.001373
Core matrisome	ECM Glycoproteins	ADIPOQ	adiponectin, C1Q and collagen domain containing	13633	rs1648707	3 186551711	Pseudoexfoliation glaucoma	365.5	Adiponectin levels	83	0.5407	0.001649
Core matrisome	ECM Glycoproteins	ADIPOQ	adiponectin, C1Q and collagen domain containing	13633	rs266717	3 186530484	Fracture of foot	801.1	Adiponectin levels	468	0.8081	0.002034
Core matrisome	ECM Glycoproteins	ADIPOQ	adiponectin, C1Q and collagen domain containing	13633	rs266717	3 186530484	Cellulitis and abscess of trunk	681.7	Adiponectin levels	229	1.341	0.002093
Core matrisome	ECM Glycoproteins	ADIPOQ	adiponectin, C1Q and collagen domain containing	13633	rs266717	3 186530484	Adverse effects of antineoplastic and immunosuppressive drugs	963.1	Adiponectin levels	205	1.37	0.002095
Core matrisome	ECM Glycoproteins	ADIPOQ	adiponectin, C1Q and collagen domain containing	13633	rs1648707	3 186551711	Nonsenile Cataract	366.1	Adiponectin levels	240	0.674	0.0024
Core matrisome	ECM Glycoproteins	ADIPOQ	adiponectin, C1Q and collagen domain containing	13633	rs266717	3 186530484	Congenital anomalies of genital organs	751.1	Adiponectin levels	34	0.4622	0.003311
Core matrisome	ECM Glycoproteins	ADIPOQ	adiponectin, C1Q and collagen domain containing	13633	rs266717	3 186530484	Poisoning by primarily systemic agents	963	Adiponectin levels	217	1.34	0.003314
Core matrisome	ECM Glycoproteins	ADIPOQ	adiponectin, C1Q and collagen domain containing	13633	rs266717	3 186530484	Muscle/tendon sprain	840.1	Adiponectin levels	37	0.4951	0.004534
Core matrisome	ECM Glycoproteins	ADIPOQ	adiponectin, C1Q and collagen domain containing	13633	rs1648707	3 186551711	Nontoxic multinodular goiter	241.2	Adiponectin levels	307	1.274	0.005188
Core matrisome	ECM Glycoproteins	ADIPOQ	adiponectin, C1Q and collagen domain containing	13633	rs1648707	3 186551711	Other specified intestinal malabsorption	557.8	Adiponectin levels	61	1.664	0.005449
Core matrisome	ECM Glycoproteins	ADIPOQ	adiponectin, C1Q and collagen domain containing	13633	rs266717	3 186530484	Conductive hearing loss	389.2	Adiponectin levels	85	0.6469	0.006094
Core matrisome	ECM Glycoproteins	ADIPOQ	adiponectin, C1Q and collagen domain containing	13633	rs1648707	3 186551711	Impaction of intestine	560.2	Adiponectin levels	27	2.106	0.006627
Core matrisome	ECM Glycoproteins	ADIPOQ	adiponectin, C1Q and collagen domain containing	13633	rs266717	3 186530484	Pseudoexfoliation glaucoma	365.5	Adiponectin levels	83	1.612	0.006629
Core matrisome	ECM Glycoproteins	ADIPOQ	adiponectin, C1Q and collagen domain containing	13633	rs266717	3 186530484	Influenza	481	Adiponectin levels	195	0.7468	0.007094
Core matrisome	ECM Glycoproteins	ADIPOQ	adiponectin, C1Q and collagen domain containing	13633	rs1648707	3 186551711	Poisoning by psychotropic agents	969	Adiponectin levels	48	0.5089	0.007502
Core matrisome	ECM Glycoproteins	ADIPOQ	adiponectin, C1Q and collagen domain containing	13633	rs1648707	3 186551711	Hypermetropia	367.8	Adiponectin levels	2420	0.8771	0.008225
Core matrisome	ECM Glycoproteins	ADIPOQ	adiponectin, C1Q and collagen domain containing	13633	rs1648707	3 186551711	Atrophic gastritis	535.2	Adiponectin levels	103	0.6505	0.008901
Core matrisome	ECM Glycoproteins	ADIPOQ	adiponectin, C1Q and collagen domain containing	13633	rs1648707	3 186551711	Other aneurysm	442	Adiponectin levels	700	1.179	0.009438
Core matrisome	ECM Glycoproteins	ADIPOQ	adiponectin, C1Q and collagen domain containing	13633	rs266717	3 186530484	Nonsenile Cataract	366.1	Adiponectin levels	240	1.357	0.009704
Core matrisome	ECM Glycoproteins	ADIPOQ	adiponectin, C1Q and collagen domain containing	13633	rs1648707	3 186551711	Mammographic microcalcification	611.11	Adiponectin levels	80	1.514	0.01073
Core matrisome	ECM Glycoproteins	ADIPOQ	adiponectin, C1Q and collagen domain containing	13633	rs266717	3 186530484	Cancer of other female genital organs	184.2	Adiponectin levels	35	0.5259	0.01148
Core matrisome	ECM Glycoproteins	ADIPOQ	adiponectin, C1Q and collagen domain containing	13633	rs266717	3 186530484	Noninfectious disorders of lymphatic channels	450	Adiponectin levels	192	1.299	0.01197
Core matrisome	ECM Glycoproteins	ADIPOQ	adiponectin, C1Q and collagen domain containing	13633	rs266717	3 186530484	Disturbances of amino-acid transport	270.1	Adiponectin levels	45	1.741	0.01252
Core matrisome	ECM Glycoproteins	ADIPOQ	adiponectin, C1Q and collagen domain containing	13633	rs266717	3 186530484	Disturbances of sulphur-bearing amino-acid metabolism	270.11	Adiponectin levels	44	1.741	0.01252
Core matrisome	ECM Glycoproteins	ADIPOQ	adiponectin, C1Q and collagen domain containing	13633	rs266717	3 186530484	Disturbance of salivary secretion	527.7	Adiponectin levels	60	0.6236	0.0129
Core matrisome	ECM Glycoproteins	ADIPOQ	adiponectin, C1Q and collagen domain containing	13633	rs1648707	3 186551711	Fracture of neck of femur	800.1	Adiponectin levels	539	0.8288	0.01312
Core matrisome	ECM Glycoproteins	ADIPOQ	adiponectin, C1Q and collagen domain containing	13633	rs266717	3 186530484	Fracture of ankle and foot	801	Adiponectin levels	948	0.8823	0.01313
Core matrisome	ECM Glycoproteins	ADIPOQ	adiponectin, C1Q and collagen domain containing	13633	rs266717	3 186530484	Symptoms involving head and neck	293	Adiponectin levels	529	0.8516	0.01322
Core matrisome	ECM Glycoproteins	ADIPOQ	adiponectin, C1Q and collagen domain containing	13633	rs266717	3 186530484	Benign neoplasm of other endocrine glands	227	Adiponectin levels	131	0.7334	0.01407
Core matrisome	ECM Glycoproteins	ADIPOQ	adiponectin, C1Q and collagen domain containing	13633	rs266717	3 186530484	Stress fracture	743.4	Adiponectin levels	40	1.763	0.01502
Core matrisome	ECM Glycoproteins	ADIPOQ	adiponectin, C1Q and collagen domain containing	13633	rs266717	3 186530484	Anemia in neoplastic disease	285.22	Adiponectin levels	130	1.361	0.01503
Core matrisome	ECM Glycoproteins	ADIPOQ	adiponectin, C1Q and collagen domain containing	13633	rs1648707	3 186551711	Celiac disease	557.11	Adiponectin levels	46	0.5397	0.01599
Core matrisome	ECM Glycoproteins	ADIPOQ	adiponectin, C1Q and collagen domain containing	13633	rs1648707	3 186551711	Other abnormal glucose	250.42	Adiponectin levels	1078	0.8829	0.01613
Core matrisome	ECM Glycoproteins	ADIPOQ	adiponectin, C1Q and collagen domain containing	13633	rs1648707	3 186551711	Elevated levels of transaminase or lactic acid dehydrogenase	573.91	Adiponectin levels	522	1.177	0.01692
Core matrisome	ECM Glycoproteins	ADIPOQ	adiponectin, C1Q and collagen domain containing	13633	rs1648707	3 186551711	Abdominal aortic aneurysm	442.11	Adiponectin levels	404	1.212	0.01733
Core matrisome	ECM Glycoproteins	ADIPOQ	adiponectin, C1Q and collagen domain containing	13633	rs1648707	3 186551711	Contracture of joint	739	Adiponectin levels	137	1.344	0.01765
Core matrisome	ECM Glycoproteins	ADIPOQ	adiponectin, C1Q and collagen domain containing	13633	rs266717	3 186530484	Sepsis	994.2	Adiponectin levels	270	1.231	0.01769
Core matrisome	ECM Glycoproteins	ADIPOQ	adiponectin, C1Q and collagen domain containing	13633	rs1648707	3 186551711	Aortic aneurysm	442.1	Adiponectin levels	559	1.182	0.01777
Core matrisome	ECM Glycoproteins	ADIPOQ	adiponectin, C1Q and collagen domain containing	13633	rs1648707	3 186551711	Anaphylactic shock NOS	946	Adiponectin levels	99	0.6766	0.01788
Core matrisome	ECM Glycoproteins	ADIPOQ	adiponectin, C1Q and collagen domain containing	13633	rs266717	3 186530484	Hemiplegia	342	Adiponectin levels	192	1.282	0.01814
Core matrisome	ECM Glycoproteins	ADIPOQ	adiponectin, C1Q and collagen domain containing	13633	rs1648707	3 186551711	Abnormal serum enzyme levels	573.9	Adiponectin levels	999	1.129	0.01873
Core matrisome	ECM Glycoproteins	ADIPOQ	adiponectin, C1Q and collagen domain containing	13633	rs266717	3 186530484	Psoriasis & related disorders	696	Adiponectin levels	368	1.198	0.01902
Core matrisome	ECM Glycoproteins	ADIPOQ	adiponectin, C1Q and collagen domain containing	13633	rs266717	3 186530484	Nausea and vomiting	789	Adiponectin levels	1851	1.09	0.01939
Core matrisome	ECM Glycoproteins	ADIPOQ	adiponectin, C1Q and collagen domain containing	13633	rs266717	3 186530484	Cancer of other female genital organs	184	Adiponectin levels	106	0.7179	0.01993
Core matrisome	ECM Glycoproteins	ADIPOQ	adiponectin, C1Q and collagen domain containing	13633	rs1648707	3 186551711	Spasm of muscle	772.2	Adiponectin levels	402	0.8321	0.02007
Core matrisome	ECM Glycoproteins	ADIPOQ	adiponectin, C1Q and collagen domain containing	13633	rs1648707	3 186551711	Disease of tricuspid valve	394.7	Adiponectin levels	338	1.225	0.0202
Core matrisome	ECM Glycoproteins	ADIPOQ	adiponectin, C1Q and collagen domain containing	13633	rs1648707	3 186551711	Respiratory complications	519.2	Adiponectin levels	63	1.527	0.02068
Core matrisome	ECM Glycoproteins	ADIPOQ	adiponectin, C1Q and collagen domain containing	13633	rs1648707	3 186551711	Benign neoplasm of colon	208	Adiponectin levels	2841	0.9234	0.02099
Core matrisome	ECM Glycoproteins	ADIPOQ	adiponectin, C1Q and collagen domain containing	13633	rs1648707	3 186551711	Ankylosing spondylitis	715.2	Adiponectin levels	25	0.4287	0.02125
Core matrisome	ECM Glycoproteins	ADIPOQ	adiponectin, C1Q and collagen domain containing	13633	rs1648707	3 186551711	Abnormal results of function studies	794	Adiponectin levels	69	0.6315	0.02151
Core matrisome	ECM Glycoproteins	ADIPOQ	adiponectin, C1Q and collagen domain containing	13633	rs266717	3 186530484	Other disorders of stomach and duodenum	537	Adiponectin levels	270	1.224	0.02317
Core matrisome	ECM Glycoproteins	ADIPOQ	adiponectin, C1Q and collagen domain containing	13633	rs266717	3 186530484	Glomerulonephritis	580.1	Adiponectin levels	60	0.6533	0.02325
Core matrisome	ECM Glycoproteins	ADIPOQ	adiponectin, C1Q and collagen domain containing	13633	rs266717	3 186530484	Leukemia	204	Adiponectin levels	192	1.265	0.02356
Core matrisome	ECM Glycoproteins	ADIPOQ	adiponectin, C1Q and collagen domain containing	13633	rs1648707	3 186551711	Heart transplant/surgery	429.1	Adiponectin levels	118	1.36	0.02362
Core matrisome	ECM Glycoproteins	ADIPOQ	adiponectin, C1Q and collagen domain containing	13633	rs266717	3 186530484	Concussion	817	Adiponectin levels	97	0.7152	0.0238
Core matrisome	ECM Glycoproteins	ADIPOQ	adiponectin, C1Q and collagen domain containing	13633	rs1648707	3 186551711	Other specified diseases of hair and hair follicles	704.8	Adiponectin levels	206	0.7779	0.02399
Core matrisome	ECM Glycoproteins	ADIPOQ	adiponectin, C1Q and collagen domain containing	13633	rs1648707	3 186551711	Other endocrine disorders	259	Adiponectin levels	80	1.437	0.02418
Core matrisome	ECM Glycoproteins	ADIPOQ	adiponectin, C1Q and collagen domain containing	13633	rs266717	3 186530484	Other specified diseases of hair and hair follicles	704.8	Adiponectin levels	206	1.255	0.02435
Core matrisome	ECM Glycoproteins	ADIPOQ	adiponectin, C1Q and collagen domain containing	13633	rs1648707	3 186551711	Retention of urine	599.2	Adiponectin levels	1095	0.8894	0.02475
Core matrisome	ECM Glycoproteins	ADIPOQ	adiponectin, C1Q and collagen domain containing	13633	rs1648707	3 186551711	Loss of teeth or edentulism	525.1	Adiponectin levels	163	0.7547	0.02497
Core matrisome	ECM Glycoproteins	ADIPOQ	adiponectin, C1Q and collagen domain containing	13633	rs1648707	3 186551711	Celiac or tropical sprue	557.1	Adiponectin levels	48	0.5783	0.02611
Core matrisome	ECM Glycoproteins	ADIPOQ	adiponectin, C1Q and collagen domain containing	13633	rs1648707	3 186551711	Psoriasis	696.4	Adiponectin levels	327	0.8233	0.02683
Core matrisome	ECM Glycoproteins	ADIPOQ	adiponectin, C1Q and collagen domain containing	13633	rs1648707	3 186551711	Psoriasis vulgaris	696.41	Adiponectin levels	311	0.82	0.02751
Core matrisome	ECM Glycoproteins	ADIPOQ	adiponectin, C1Q and collagen domain containing	13633	rs266717	3 186530484	Elevated white blood cell count	288.2	Adiponectin levels	239	0.8154	0.02854
Core matrisome	ECM Glycoproteins	ADIPOQ	adiponectin, C1Q and collagen domain containing	13633	rs266717	3 186530484	Other rheumatic heart disease	420.4	Adiponectin levels	34	1.727	0.02863
Core matrisome	ECM Glycoproteins	ADIPOQ	adiponectin, C1Q and collagen domain containing	13633	rs266717	3 186530484	Hematemesis	578.1	Adiponectin levels	70	0.6829	0.02868
Core matrisome	ECM Glycoproteins	ADIPOQ	adiponectin, C1Q and collagen domain containing	13633	rs1648707	3 186551711	Migraine	340	Adiponectin levels	744	0.8771	0.02883
Core matrisome	ECM Glycoproteins	ADIPOQ	adiponectin, C1Q and collagen domain containing	13633	rs266717	3 186530484	Disorders of coccyx	724.2	Adiponectin levels	219	0.7982	0.02884
Core matrisome	ECM Glycoproteins	ADIPOQ	adiponectin, C1Q and collagen domain containing	13633	rs1648707	3 186551711	Eating disorder	305.2	Adiponectin levels	64	1.488	0.02891
Core matrisome	ECM Glycoproteins	ADIPOQ	adiponectin, C1Q and collagen domain containing	13633	rs1648707	3 186551711	Irregular menstrual bleeding	626.14	Adiponectin levels	78	0.6408	0.02898
Core matrisome	ECM Glycoproteins	ADIPOQ	adiponectin, C1Q and collagen domain containing	13633	rs266717	3 186530484	Other intestinal obstruction	560.4	Adiponectin levels	344	0.8355	0.02925
Core matrisome	ECM Glycoproteins	ADIPOQ	adiponectin, C1Q and collagen domain containing	13633	rs1648707	3 186551711	Aneurysm and dissection of heart	411.41	Adiponectin levels	33	1.718	0.02934
Core matrisome	ECM Glycoproteins	ADIPOQ	adiponectin, C1Q and collagen domain containing	13633	rs266717	3 186530484	Symptoms involving nervous and musculoskeletal systems	781	Adiponectin levels	294	0.8314	0.0301
Core matrisome	ECM Glycoproteins	ADIPOQ	adiponectin, C1Q and collagen domain containing	13633	rs1648707	3 186551711	Dysmetabolic syndrome X	277.7	Adiponectin levels	112	1.345	0.03043
Core matrisome	ECM Glycoproteins	ADIPOQ	adiponectin, C1Q and collagen domain containing	13633	rs266717	3 186530484	Hyperparathyroidism	252.1	Adiponectin levels	218	0.8096	0.03058
Core matrisome	ECM Glycoproteins	ADIPOQ	adiponectin, C1Q and collagen domain containing	13633	rs1648707	3 186551711	Fracture of hand or wrist	804	Adiponectin levels	691	0.8742	0.03085
Core matrisome	ECM Glycoproteins	ADIPOQ	adiponectin, C1Q and collagen domain containing	13633	rs1648707	3 186551711	Congenital anomalies of peripheral vascular system	747.2	Adiponectin levels	44	0.5776	0.03176
Core matrisome	ECM Glycoproteins	ADIPOQ	adiponectin, C1Q and collagen domain containing	13633	rs266717	3 186530484	Psoriasis vulgaris	696.41	Adiponectin levels	311	1.194	0.03272
Core matrisome	ECM Glycoproteins	ADIPOQ	adiponectin, C1Q and collagen domain containing	13633	rs266717	3 186530484	Chronic laryngitis	473.1	Adiponectin levels	35	0.5868	0.03306
Core matrisome	ECM Glycoproteins	ADIPOQ	adiponectin, C1Q and collagen domain containing	13633	rs266717	3 186530484	Angiodysplasia of intestine	556.11	Adiponectin levels	31	1.763	0.03334
Core matrisome	ECM Glycoproteins	ADIPOQ	adiponectin, C1Q and collagen domain containing	13633	rs1648707	3 186551711	Cancer of other female genital organs	184.2	Adiponectin levels	35	1.67	0.03411
Core matrisome	ECM Glycoproteins	ADIPOQ	adiponectin, C1Q and collagen domain containing	13633	rs266717	3 186530484	Intestinal obstruction without mention of hernia	560	Adiponectin levels	593	0.8723	0.03444
Core matrisome	ECM Glycoproteins	ADIPOQ	adiponectin, C1Q and collagen domain containing	13633	rs266717	3 186530484	Gastrointestinal hemorrhage	578	Adiponectin levels	1948	0.9245	0.03447
Core matrisome	ECM Glycoproteins	ADIPOQ	adiponectin, C1Q and collagen domain containing	13633	rs1648707	3 186551711	Rheumatoid arthritis	714.1	Adiponectin levels	398	0.846	0.03524
Core matrisome	ECM Glycoproteins	ADIPOQ	adiponectin, C1Q and collagen domain containing	13633	rs266717	3 186530484	Macular puckering of retina	362.26	Adiponectin levels	526	1.166	0.0353
Core matrisome	ECM Glycoproteins	ADIPOQ	adiponectin, C1Q and collagen domain containing	13633	rs1648707	3 186551711	Disorders of cervical region	723	Adiponectin levels	182	1.262	0.03608
Core matrisome	ECM Glycoproteins	ADIPOQ	adiponectin, C1Q and collagen domain containing	13633	rs266717	3 186530484	Pituitary hyperfunction	253.1	Adiponectin levels	28	0.5491	0.03616
Core matrisome	ECM Glycoproteins	ADIPOQ	adiponectin, C1Q and collagen domain containing	13633	rs1648707	3 186551711	Other disorders of urethra and urinary tract	597	Adiponectin levels	427	0.8529	0.03632
Core matrisome	ECM Glycoproteins	ADIPOQ	adiponectin, C1Q and collagen domain containing	13633	rs1648707	3 186551711	Sepsis and SIRS	994	Adiponectin levels	290	0.8245	0.03639
Core matrisome	ECM Glycoproteins	ADIPOQ	adiponectin, C1Q and collagen domain containing	13633	rs1648707	3 186551711	Liver replaced by transplant	573.2	Adiponectin levels	28	0.4938	0.03651
Core matrisome	ECM Glycoproteins	ADIPOQ	adiponectin, C1Q and collagen domain containing	13633	rs266717	3 186530484	Peptic ulcer	531	Adiponectin levels	784	0.8901	0.03729
Core matrisome	ECM Glycoproteins	ADIPOQ	adiponectin, C1Q and collagen domain containing	13633	rs1648707	3 186551711	Deficiency of humoral immunity	279.11	Adiponectin levels	29	0.5078	0.0373
Core matrisome	ECM Glycoproteins	ADIPOQ	adiponectin, C1Q and collagen domain containing	13633	rs266717	3 186530484	Swelling, mass, or lump in head and neck	293.1	Adiponectin levels	361	0.8515	0.0376
Core matrisome	ECM Glycoproteins	ADIPOQ	adiponectin, C1Q and collagen domain containing	13633	rs1648707	3 186551711	Glomerulonephritis	580.1	Adiponectin levels	60	1.468	0.03823
Core matrisome	ECM Glycoproteins	ADIPOQ	adiponectin, C1Q and collagen domain containing	13633	rs266717	3 186530484	Hypermetropia	367.8	Adiponectin levels	2420	1.102	0.03854
Core matrisome	ECM Glycoproteins	ADIPOQ	adiponectin, C1Q and collagen domain containing	13633	rs266717	3 186530484	Open-angle glaucoma	365.1	Adiponectin levels	933	0.8904	0.03902
Core matrisome	ECM Glycoproteins	ADIPOQ	adiponectin, C1Q and collagen domain containing	13633	rs1648707	3 186551711	Intervertebral disc disorder with myelopathy	722.7	Adiponectin levels	52	0.6209	0.04032
Core matrisome	ECM Glycoproteins	ADIPOQ	adiponectin, C1Q and collagen domain containing	13633	rs1648707	3 186551711	Hemorrhage of rectum and anus	578.8	Adiponectin levels	526	1.148	0.04047
Core matrisome	ECM Glycoproteins	ADIPOQ	adiponectin, C1Q and collagen domain containing	13633	rs1648707	3 186551711	Streptococcus infection	041.2	Adiponectin levels	183	0.7866	0.04058
Core matrisome	ECM Glycoproteins	ADIPOQ	adiponectin, C1Q and collagen domain containing	13633	rs266717	3 186530484	Generalized anxiety disorder	300.11	Adiponectin levels	249	1.209	0.04069
Core matrisome	ECM Glycoproteins	ADIPOQ	adiponectin, C1Q and collagen domain containing	13633	rs266717	3 186530484	Otitis media	381.1	Adiponectin levels	1063	0.9047	0.04104
Core matrisome	ECM Glycoproteins	ADIPOQ	adiponectin, C1Q and collagen domain containing	13633	rs266717	3 186530484	Mental retardation	315.3	Adiponectin levels	27	1.791	0.04157
Core matrisome	ECM Glycoproteins	ADIPOQ	adiponectin, C1Q and collagen domain containing	13633	rs1648707	3 186551711	Diseases of lips	528.5	Adiponectin levels	100	0.7191	0.04163
Core matrisome	ECM Glycoproteins	ADIPOQ	adiponectin, C1Q and collagen domain containing	13633	rs266717	3 186530484	Other nonspecific findings on examination of urine	598.9	Adiponectin levels	530	1.144	0.04231
Core matrisome	ECM Glycoproteins	ADIPOQ	adiponectin, C1Q and collagen domain containing	13633	rs266717	3 186530484	Peptic ulcers	531.4	Adiponectin levels	343	0.8478	0.04329
Core matrisome	ECM Glycoproteins	ADIPOQ	adiponectin, C1Q and collagen domain containing	13633	rs1648707	3 186551711	Decubitus ulcer	707.1	Adiponectin levels	385	0.8488	0.04346
Core matrisome	ECM Glycoproteins	ADIPOQ	adiponectin, C1Q and collagen domain containing	13633	rs266717	3 186530484	Other specified peripheral vascular diseases	443.8	Adiponectin levels	32	1.698	0.044
Core matrisome	ECM Glycoproteins	ADIPOQ	adiponectin, C1Q and collagen domain containing	13633	rs266717	3 186530484	Postlaminectomy syndrome	722.8	Adiponectin levels	137	0.7796	0.04454
Core matrisome	ECM Glycoproteins	ADIPOQ	adiponectin, C1Q and collagen domain containing	13633	rs266717	3 186530484	Other disorders of metabolic, endocrine, immunity disorders	277.9	Adiponectin levels	37	0.6197	0.04588
Core matrisome	ECM Glycoproteins	ADIPOQ	adiponectin, C1Q and collagen domain containing	13633	rs266717	3 186530484	Decubitus ulcer	707.1	Adiponectin levels	385	1.16	0.04709
Core matrisome	ECM Glycoproteins	ADIPOQ	adiponectin, C1Q and collagen domain containing	13633	rs266717	3 186530484	Diaphragmatic hernia	550.2	Adiponectin levels	1110	0.9124	0.04841
Core matrisome	ECM Glycoproteins	ADIPOQ	adiponectin, C1Q and collagen domain containing	13633	rs266717	3 186530484	Myeloid leukemia	204.2	Adiponectin levels	42	1.554	0.04876
Core matrisome	ECM Glycoproteins	ADIPOQ	adiponectin, C1Q and collagen domain containing	13633	rs266717	3 186530484	Cardiac complications, not elsewhere classified	429.9	Adiponectin levels	153	1.263	0.04929
Core matrisome	ECM Glycoproteins	ADIPOQ	adiponectin, C1Q and collagen domain containing	13633	rs1648707	3 186551711	Sepsis	994.2	Adiponectin levels	270	0.8293	0.04973
Core matrisome	ECM Glycoproteins	CRIM1	cysteine rich transmembrane BMP regulator 1 (chordin-like)	2359	rs1863080	2 36526436	Adverse effects of adrenal cortical steroids	962.1	Brachial circumference	82	2.081	2.75e-4
Core matrisome	ECM Glycoproteins	CRIM1	cysteine rich transmembrane BMP regulator 1 (chordin-like)	2359	rs1863080	2 36526436	Acute pharyngitis	465.2	Brachial circumference	1455	1.353	4.537e-4
Core matrisome	ECM Glycoproteins	CRIM1	cysteine rich transmembrane BMP regulator 1 (chordin-like)	2359	rs7562790	2 36527059	Acne	706.1	Ventricular conduction	262	1.373	4.852e-4
Core matrisome	ECM Glycoproteins	CRIM1	cysteine rich transmembrane BMP regulator 1 (chordin-like)	2359	rs1863080	2 36526436	Dermatosis NOS	689	Brachial circumference	2203	1.228	8.811e-4
Core matrisome	ECM Glycoproteins	CRIM1	cysteine rich transmembrane BMP regulator 1 (chordin-like)	2359	rs1863080	2 36526436	Acute upper respiratory infections	465	Brachial circumference	3947	1.215	9.273e-4
Core matrisome	ECM Glycoproteins	CRIM1	cysteine rich transmembrane BMP regulator 1 (chordin-like)	2359	rs1863080	2 36526436	Bronchitis	497	Brachial circumference	1449	1.292	0.00142
Core matrisome	ECM Glycoproteins	CRIM1	cysteine rich transmembrane BMP regulator 1 (chordin-like)	2359	rs7562790	2 36527059	Other anemias	285	Ventricular conduction	3459	1.103	0.00142
Core matrisome	ECM Glycoproteins	CRIM1	cysteine rich transmembrane BMP regulator 1 (chordin-like)	2359	rs1863080	2 36526436	Poisoning by analgesics, antipyretics, and antirheumatics	965	Brachial circumference	205	1.6	0.001648
Core matrisome	ECM Glycoproteins	CRIM1	cysteine rich transmembrane BMP regulator 1 (chordin-like)	2359	rs1863080	2 36526436	Dermatophytosis / Dermatomycosis	110	Brachial circumference	2104	1.211	0.001973
Core matrisome	ECM Glycoproteins	CRIM1	cysteine rich transmembrane BMP regulator 1 (chordin-like)	2359	rs1863080	2 36526436	Sprains and strains	840	Brachial circumference	2841	1.218	0.001989
Core matrisome	ECM Glycoproteins	CRIM1	cysteine rich transmembrane BMP regulator 1 (chordin-like)	2359	rs7562790	2 36527059	Nevus, non-neoplastic	448.1	Ventricular conduction	60	1.758	0.002289
Core matrisome	ECM Glycoproteins	CRIM1	cysteine rich transmembrane BMP regulator 1 (chordin-like)	2359	rs7562790	2 36527059	Anemia NOS	285.9	Ventricular conduction	2860	1.105	0.002501
Core matrisome	ECM Glycoproteins	CRIM1	cysteine rich transmembrane BMP regulator 1 (chordin-like)	2359	rs7562790	2 36527059	Ileostomy status	559	Ventricular conduction	69	1.692	0.002598
Core matrisome	ECM Glycoproteins	CRIM1	cysteine rich transmembrane BMP regulator 1 (chordin-like)	2359	rs1863080	2 36526436	Antisocial/borderline personality disorder	301.2	Brachial circumference	66	2.031	0.002909
Core matrisome	ECM Glycoproteins	CRIM1	cysteine rich transmembrane BMP regulator 1 (chordin-like)	2359	rs7562790	2 36527059	Stress fracture	743.4	Ventricular conduction	40	0.4669	0.003105
Core matrisome	ECM Glycoproteins	CRIM1	cysteine rich transmembrane BMP regulator 1 (chordin-like)	2359	rs1863080	2 36526436	Ulceration of intestine	556.1	Brachial circumference	65	2.065	0.003178
Core matrisome	ECM Glycoproteins	CRIM1	cysteine rich transmembrane BMP regulator 1 (chordin-like)	2359	rs1863080	2 36526436	Dermatophytosis	110.1	Brachial circumference	1989	1.203	0.003427
Core matrisome	ECM Glycoproteins	CRIM1	cysteine rich transmembrane BMP regulator 1 (chordin-like)	2359	rs7562790	2 36527059	Contact dermatitis and other eczema due to plants [except food]	931	Ventricular conduction	52	1.803	0.003649
Core matrisome	ECM Glycoproteins	CRIM1	cysteine rich transmembrane BMP regulator 1 (chordin-like)	2359	rs7562790	2 36527059	Cancer of mouth	145	Ventricular conduction	86	0.6152	0.004042
Core matrisome	ECM Glycoproteins	CRIM1	cysteine rich transmembrane BMP regulator 1 (chordin-like)	2359	rs7562790	2 36527059	Light-headedness and vertigo	386.9	Ventricular conduction	2692	1.104	0.004446
Core matrisome	ECM Glycoproteins	CRIM1	cysteine rich transmembrane BMP regulator 1 (chordin-like)	2359	rs7562790	2 36527059	Symptoms and disorders of the joints	741	Ventricular conduction	1520	1.122	0.004797
Core matrisome	ECM Glycoproteins	CRIM1	cysteine rich transmembrane BMP regulator 1 (chordin-like)	2359	rs7562790	2 36527059	Other acquired musculoskeletal deformity	738	Ventricular conduction	353	0.7971	0.00493
Core matrisome	ECM Glycoproteins	CRIM1	cysteine rich transmembrane BMP regulator 1 (chordin-like)	2359	rs7562790	2 36527059	Other nonspecific findings on examination of urine	598.9	Ventricular conduction	530	1.202	0.005213
Core matrisome	ECM Glycoproteins	CRIM1	cysteine rich transmembrane BMP regulator 1 (chordin-like)	2359	rs1863080	2 36526436	Esophageal atresia/tracheoesophageal fistula	750.11	Brachial circumference	54	2.037	0.005696
Core matrisome	ECM Glycoproteins	CRIM1	cysteine rich transmembrane BMP regulator 1 (chordin-like)	2359	rs1863080	2 36526436	Acute bronchospasm	498	Brachial circumference	26	2.58	0.006366
Core matrisome	ECM Glycoproteins	CRIM1	cysteine rich transmembrane BMP regulator 1 (chordin-like)	2359	rs7562790	2 36527059	Keratoconjunctivitis sicca	371.51	Ventricular conduction	70	1.615	0.00665
Core matrisome	ECM Glycoproteins	CRIM1	cysteine rich transmembrane BMP regulator 1 (chordin-like)	2359	rs7562790	2 36527059	Stiffness of joint	741.2	Ventricular conduction	504	1.198	0.006865
Core matrisome	ECM Glycoproteins	CRIM1	cysteine rich transmembrane BMP regulator 1 (chordin-like)	2359	rs7562790	2 36527059	Acute and chronic tonsillitis	474	Ventricular conduction	146	1.41	0.00715
Core matrisome	ECM Glycoproteins	CRIM1	cysteine rich transmembrane BMP regulator 1 (chordin-like)	2359	rs7562790	2 36527059	Fracture of tibia and fibula	800.3	Ventricular conduction	263	0.7796	0.007451
Core matrisome	ECM Glycoproteins	CRIM1	cysteine rich transmembrane BMP regulator 1 (chordin-like)	2359	rs1863080	2 36526436	Erectile dysfunction	605	Brachial circumference	1098	1.294	0.0082
Core matrisome	ECM Glycoproteins	CRIM1	cysteine rich transmembrane BMP regulator 1 (chordin-like)	2359	rs7562790	2 36527059	Congenital anomalies of urinary system	751.2	Ventricular conduction	107	0.6788	0.008417
Core matrisome	ECM Glycoproteins	CRIM1	cysteine rich transmembrane BMP regulator 1 (chordin-like)	2359	rs7562790	2 36527059	Intestinal malabsorption	557	Ventricular conduction	161	1.354	0.008686
Core matrisome	ECM Glycoproteins	CRIM1	cysteine rich transmembrane BMP regulator 1 (chordin-like)	2359	rs1863080	2 36526436	Hyperbilirubinemia	277.4	Brachial circumference	46	2.042	0.008986
Core matrisome	ECM Glycoproteins	CRIM1	cysteine rich transmembrane BMP regulator 1 (chordin-like)	2359	rs1863080	2 36526436	Type 2 diabetic ketoacidosis	250.21	Brachial circumference	1112	1.218	0.0093
Core matrisome	ECM Glycoproteins	CRIM1	cysteine rich transmembrane BMP regulator 1 (chordin-like)	2359	rs1863080	2 36526436	Arterial embolism and thrombosis of lower extremity artery	444.1	Brachial circumference	184	0.5242	0.009562
Core matrisome	ECM Glycoproteins	CRIM1	cysteine rich transmembrane BMP regulator 1 (chordin-like)	2359	rs1863080	2 36526436	Symptoms of the muscles	772	Brachial circumference	313	1.38	0.00973
Core matrisome	ECM Glycoproteins	CRIM1	cysteine rich transmembrane BMP regulator 1 (chordin-like)	2359	rs7562790	2 36527059	Hx of malignant neoplasm of oral cavity and pharynx	149.5	Ventricular conduction	62	0.5965	0.009837
Core matrisome	ECM Glycoproteins	CRIM1	cysteine rich transmembrane BMP regulator 1 (chordin-like)	2359	rs7562790	2 36527059	Vascular insufficiency of intestine	441	Ventricular conduction	132	1.376	0.009878
Core matrisome	ECM Glycoproteins	CRIM1	cysteine rich transmembrane BMP regulator 1 (chordin-like)	2359	rs7562790	2 36527059	Lower gastrointestinal congenital anomalies	750.2	Ventricular conduction	41	1.765	0.01038
Core matrisome	ECM Glycoproteins	CRIM1	cysteine rich transmembrane BMP regulator 1 (chordin-like)	2359	rs7562790	2 36527059	Vertiginous syndromes and other disorders of vestibular system	386	Ventricular conduction	3002	1.089	0.01041
Core matrisome	ECM Glycoproteins	CRIM1	cysteine rich transmembrane BMP regulator 1 (chordin-like)	2359	rs1863080	2 36526436	Other diseases of the teeth and supporting structures	525	Brachial circumference	330	1.375	0.01116
Core matrisome	ECM Glycoproteins	CRIM1	cysteine rich transmembrane BMP regulator 1 (chordin-like)	2359	rs7562790	2 36527059	Graves' disease	242.1	Ventricular conduction	102	1.424	0.01171
Core matrisome	ECM Glycoproteins	CRIM1	cysteine rich transmembrane BMP regulator 1 (chordin-like)	2359	rs7562790	2 36527059	Adrenal hyperfunction	255.1	Ventricular conduction	42	1.738	0.01172
Core matrisome	ECM Glycoproteins	CRIM1	cysteine rich transmembrane BMP regulator 1 (chordin-like)	2359	rs1863080	2 36526436	Allergies, other	949	Brachial circumference	323	1.39	0.01246
Core matrisome	ECM Glycoproteins	CRIM1	cysteine rich transmembrane BMP regulator 1 (chordin-like)	2359	rs7562790	2 36527059	Hemorrhage of gastrointestinal tract	578.9	Ventricular conduction	682	1.157	0.01276
Core matrisome	ECM Glycoproteins	CRIM1	cysteine rich transmembrane BMP regulator 1 (chordin-like)	2359	rs1863080	2 36526436	Peyronie's disease	604.3	Brachial circumference	44	2.067	0.0135
Core matrisome	ECM Glycoproteins	CRIM1	cysteine rich transmembrane BMP regulator 1 (chordin-like)	2359	rs1863080	2 36526436	Poisoning by hormones and synthetic substitutes	962	Brachial circumference	159	1.505	0.01371
Core matrisome	ECM Glycoproteins	CRIM1	cysteine rich transmembrane BMP regulator 1 (chordin-like)	2359	rs1863080	2 36526436	Poisoning by agents affecting the cardiovascular system	972	Brachial circumference	223	0.6076	0.01408
Core matrisome	ECM Glycoproteins	CRIM1	cysteine rich transmembrane BMP regulator 1 (chordin-like)	2359	rs1863080	2 36526436	Bronchopneumonia and lung abscess	480.5	Brachial circumference	49	1.969	0.01496
Core matrisome	ECM Glycoproteins	CRIM1	cysteine rich transmembrane BMP regulator 1 (chordin-like)	2359	rs1863080	2 36526436	Cancer of larynx	149.4	Brachial circumference	101	0.4173	0.01565
Core matrisome	ECM Glycoproteins	CRIM1	cysteine rich transmembrane BMP regulator 1 (chordin-like)	2359	rs1863080	2 36526436	Congenital musculoskeletal anomalies	756	Brachial circumference	26	2.288	0.01594
Core matrisome	ECM Glycoproteins	CRIM1	cysteine rich transmembrane BMP regulator 1 (chordin-like)	2359	rs1863080	2 36526436	Ulceration of the lower GI tract	556	Brachial circumference	82	1.75	0.01608
Core matrisome	ECM Glycoproteins	CRIM1	cysteine rich transmembrane BMP regulator 1 (chordin-like)	2359	rs1863080	2 36526436	Benign neoplasm of uterus	218.2	Brachial circumference	83	1.73	0.0165
Core matrisome	ECM Glycoproteins	CRIM1	cysteine rich transmembrane BMP regulator 1 (chordin-like)	2359	rs7562790	2 36527059	Myeloproliferative disease	200	Ventricular conduction	165	1.305	0.01661
Core matrisome	ECM Glycoproteins	CRIM1	cysteine rich transmembrane BMP regulator 1 (chordin-like)	2359	rs1863080	2 36526436	Pyogenic granuloma	686.4	Brachial circumference	43	2.02	0.01683
Core matrisome	ECM Glycoproteins	CRIM1	cysteine rich transmembrane BMP regulator 1 (chordin-like)	2359	rs7562790	2 36527059	Acute posthemorrhagic anemia	285.1	Ventricular conduction	679	1.15	0.0169
Core matrisome	ECM Glycoproteins	CRIM1	cysteine rich transmembrane BMP regulator 1 (chordin-like)	2359	rs7562790	2 36527059	Other alveolar and parietoalveolar pneumonopathy	504	Ventricular conduction	62	0.6257	0.01695
Core matrisome	ECM Glycoproteins	CRIM1	cysteine rich transmembrane BMP regulator 1 (chordin-like)	2359	rs7562790	2 36527059	Costochondritis	733.6	Ventricular conduction	45	1.655	0.01717
Core matrisome	ECM Glycoproteins	CRIM1	cysteine rich transmembrane BMP regulator 1 (chordin-like)	2359	rs1863080	2 36526436	Acute sinusitis	464	Brachial circumference	1573	1.213	0.01824
Core matrisome	ECM Glycoproteins	CRIM1	cysteine rich transmembrane BMP regulator 1 (chordin-like)	2359	rs7562790	2 36527059	Cancer of oropharynx	149.1	Ventricular conduction	30	0.4899	0.01833
Core matrisome	ECM Glycoproteins	CRIM1	cysteine rich transmembrane BMP regulator 1 (chordin-like)	2359	rs7562790	2 36527059	Corneal degenerations	364.4	Ventricular conduction	184	0.762	0.01851
Core matrisome	ECM Glycoproteins	CRIM1	cysteine rich transmembrane BMP regulator 1 (chordin-like)	2359	rs7562790	2 36527059	Nervous system congenital anomalies	752	Ventricular conduction	128	0.7296	0.01854
Core matrisome	ECM Glycoproteins	CRIM1	cysteine rich transmembrane BMP regulator 1 (chordin-like)	2359	rs7562790	2 36527059	Cervical cancer and dysplasia	180	Ventricular conduction	263	1.24	0.0186
Core matrisome	ECM Glycoproteins	CRIM1	cysteine rich transmembrane BMP regulator 1 (chordin-like)	2359	rs1863080	2 36526436	Other diseases of respiratory system	519.8	Brachial circumference	151	1.495	0.01915
Core matrisome	ECM Glycoproteins	CRIM1	cysteine rich transmembrane BMP regulator 1 (chordin-like)	2359	rs1863080	2 36526436	Hx of malignant neoplasm of oral cavity and pharynx	149.5	Brachial circumference	62	0.2548	0.01933
Core matrisome	ECM Glycoproteins	CRIM1	cysteine rich transmembrane BMP regulator 1 (chordin-like)	2359	rs1863080	2 36526436	Cancer of the upper aerodigestive tract	149	Brachial circumference	150	0.537	0.01938
Core matrisome	ECM Glycoproteins	CRIM1	cysteine rich transmembrane BMP regulator 1 (chordin-like)	2359	rs7562790	2 36527059	Prolapse of vaginal vault after hysterectomy	618.5	Ventricular conduction	102	1.391	0.01941
Core matrisome	ECM Glycoproteins	CRIM1	cysteine rich transmembrane BMP regulator 1 (chordin-like)	2359	rs7562790	2 36527059	Nontoxic multinodular goiter	241.2	Ventricular conduction	307	1.212	0.0198
Core matrisome	ECM Glycoproteins	CRIM1	cysteine rich transmembrane BMP regulator 1 (chordin-like)	2359	rs7562790	2 36527059	Other disorders of intestine	569	Ventricular conduction	533	1.157	0.02113
Core matrisome	ECM Glycoproteins	CRIM1	cysteine rich transmembrane BMP regulator 1 (chordin-like)	2359	rs1863080	2 36526436	Atrophy of edentulous alveolar ridge	525.2	Brachial circumference	98	1.64	0.02134
Core matrisome	ECM Glycoproteins	CRIM1	cysteine rich transmembrane BMP regulator 1 (chordin-like)	2359	rs1863080	2 36526436	Other cerebral degenerations	331	Brachial circumference	128	0.5043	0.02162
Core matrisome	ECM Glycoproteins	CRIM1	cysteine rich transmembrane BMP regulator 1 (chordin-like)	2359	rs7562790	2 36527059	Tobacco use disorder	318	Ventricular conduction	1902	0.9194	0.0217
Core matrisome	ECM Glycoproteins	CRIM1	cysteine rich transmembrane BMP regulator 1 (chordin-like)	2359	rs1863080	2 36526436	Malignant neoplasm of kidney and other urinary organs	189.4	Brachial circumference	58	0.2604	0.02174
Core matrisome	ECM Glycoproteins	CRIM1	cysteine rich transmembrane BMP regulator 1 (chordin-like)	2359	rs7562790	2 36527059	Kidney replaced by transpant	587	Ventricular conduction	116	0.7248	0.02174
Core matrisome	ECM Glycoproteins	CRIM1	cysteine rich transmembrane BMP regulator 1 (chordin-like)	2359	rs1863080	2 36526436	Psychogenic disorder	303.3	Brachial circumference	127	1.555	0.02195
Core matrisome	ECM Glycoproteins	CRIM1	cysteine rich transmembrane BMP regulator 1 (chordin-like)	2359	rs1863080	2 36526436	Diseases of white blood cells	288	Brachial circumference	565	0.7634	0.02234
Core matrisome	ECM Glycoproteins	CRIM1	cysteine rich transmembrane BMP regulator 1 (chordin-like)	2359	rs1863080	2 36526436	Giant cell arteritis	446.5	Brachial circumference	91	1.629	0.02274
Core matrisome	ECM Glycoproteins	CRIM1	cysteine rich transmembrane BMP regulator 1 (chordin-like)	2359	rs1863080	2 36526436	Dermatophytosis of nail	110.11	Brachial circumference	1447	1.18	0.02284
Core matrisome	ECM Glycoproteins	CRIM1	cysteine rich transmembrane BMP regulator 1 (chordin-like)	2359	rs1863080	2 36526436	Rash and other nonspecific skin eruption	687.1	Brachial circumference	803	1.221	0.02361
Core matrisome	ECM Glycoproteins	CRIM1	cysteine rich transmembrane BMP regulator 1 (chordin-like)	2359	rs1863080	2 36526436	Osteoarthrosis, generalized	740.2	Brachial circumference	530	1.286	0.02376
Core matrisome	ECM Glycoproteins	CRIM1	cysteine rich transmembrane BMP regulator 1 (chordin-like)	2359	rs7562790	2 36527059	Conductive hearing loss	389.2	Ventricular conduction	85	0.6902	0.02439
Core matrisome	ECM Glycoproteins	CRIM1	cysteine rich transmembrane BMP regulator 1 (chordin-like)	2359	rs7562790	2 36527059	Iatrogenic hypothyroidism	244.1	Ventricular conduction	188	1.265	0.02453
Core matrisome	ECM Glycoproteins	CRIM1	cysteine rich transmembrane BMP regulator 1 (chordin-like)	2359	rs1863080	2 36526436	Pseudomonal pneumonia	480.12	Brachial circumference	25	2.265	0.02475
Core matrisome	ECM Glycoproteins	CRIM1	cysteine rich transmembrane BMP regulator 1 (chordin-like)	2359	rs7562790	2 36527059	Chronic tonsillitis and adenoiditis	474.2	Ventricular conduction	57	1.536	0.02517
Core matrisome	ECM Glycoproteins	CRIM1	cysteine rich transmembrane BMP regulator 1 (chordin-like)	2359	rs1863080	2 36526436	Type 2 diabetic neuropathy	250.24	Brachial circumference	644	1.238	0.02537
Core matrisome	ECM Glycoproteins	CRIM1	cysteine rich transmembrane BMP regulator 1 (chordin-like)	2359	rs7562790	2 36527059	Disorders of the autonomic nervous system	337	Ventricular conduction	217	0.7971	0.02556
Core matrisome	ECM Glycoproteins	CRIM1	cysteine rich transmembrane BMP regulator 1 (chordin-like)	2359	rs7562790	2 36527059	Chronic venous hypertension	453	Ventricular conduction	31	1.762	0.0256
Core matrisome	ECM Glycoproteins	CRIM1	cysteine rich transmembrane BMP regulator 1 (chordin-like)	2359	rs7562790	2 36527059	Bacterial infection NOS	041	Ventricular conduction	1040	1.11	0.0257
Core matrisome	ECM Glycoproteins	CRIM1	cysteine rich transmembrane BMP regulator 1 (chordin-like)	2359	rs1863080	2 36526436	Dentofacial anomalies, including malocclusion	524	Brachial circumference	81	1.676	0.02571
Core matrisome	ECM Glycoproteins	CRIM1	cysteine rich transmembrane BMP regulator 1 (chordin-like)	2359	rs1863080	2 36526436	Disorders of muscle, ligament, and fascia	728	Brachial circumference	1031	1.221	0.02577
Core matrisome	ECM Glycoproteins	CRIM1	cysteine rich transmembrane BMP regulator 1 (chordin-like)	2359	rs1863080	2 36526436	Spondylolisthesis, congenital	754.2	Brachial circumference	79	0.3977	0.02621
Core matrisome	ECM Glycoproteins	CRIM1	cysteine rich transmembrane BMP regulator 1 (chordin-like)	2359	rs7562790	2 36527059	Other dyschromia	694.2	Ventricular conduction	310	1.202	0.02669
Core matrisome	ECM Glycoproteins	CRIM1	cysteine rich transmembrane BMP regulator 1 (chordin-like)	2359	rs1863080	2 36526436	Noninflammatory female genital disorders	619	Brachial circumference	571	0.7662	0.02712
Core matrisome	ECM Glycoproteins	CRIM1	cysteine rich transmembrane BMP regulator 1 (chordin-like)	2359	rs7562790	2 36527059	Other specified intestinal malabsorption	557.8	Ventricular conduction	61	1.512	0.02785
Core matrisome	ECM Glycoproteins	CRIM1	cysteine rich transmembrane BMP regulator 1 (chordin-like)	2359	rs1863080	2 36526436	Cholelithiasis with other cholecystitis	574.12	Brachial circumference	243	1.367	0.0281
Core matrisome	ECM Glycoproteins	CRIM1	cysteine rich transmembrane BMP regulator 1 (chordin-like)	2359	rs7562790	2 36527059	Acquired spondylolisthesis	738.4	Ventricular conduction	227	0.8042	0.02841
Core matrisome	ECM Glycoproteins	CRIM1	cysteine rich transmembrane BMP regulator 1 (chordin-like)	2359	rs7562790	2 36527059	Iron deficiency anemias	280.1	Ventricular conduction	1044	1.113	0.02862
Core matrisome	ECM Glycoproteins	CRIM1	cysteine rich transmembrane BMP regulator 1 (chordin-like)	2359	rs7562790	2 36527059	Noninflammatory female genital disorders	619	Ventricular conduction	571	1.149	0.02953
Core matrisome	ECM Glycoproteins	CRIM1	cysteine rich transmembrane BMP regulator 1 (chordin-like)	2359	rs7562790	2 36527059	Hodgkin's disease	201	Ventricular conduction	45	1.583	0.02997
Core matrisome	ECM Glycoproteins	CRIM1	cysteine rich transmembrane BMP regulator 1 (chordin-like)	2359	rs7562790	2 36527059	Celiac disease	557.11	Ventricular conduction	46	1.582	0.03011
Core matrisome	ECM Glycoproteins	CRIM1	cysteine rich transmembrane BMP regulator 1 (chordin-like)	2359	rs7562790	2 36527059	Diseases of hair and hair follicles	704	Ventricular conduction	413	1.169	0.03027
Core matrisome	ECM Glycoproteins	CRIM1	cysteine rich transmembrane BMP regulator 1 (chordin-like)	2359	rs1863080	2 36526436	Benign neoplasm of colon	208	Brachial circumference	2841	1.126	0.03099
Core matrisome	ECM Glycoproteins	CRIM1	cysteine rich transmembrane BMP regulator 1 (chordin-like)	2359	rs7562790	2 36527059	Keratoconjunctivitis, noninfectious	371.5	Ventricular conduction	111	1.349	0.03156
Core matrisome	ECM Glycoproteins	CRIM1	cysteine rich transmembrane BMP regulator 1 (chordin-like)	2359	rs1863080	2 36526436	Noninfectious dermatoses of eyelid	371.33	Brachial circumference	60	1.815	0.03254
Core matrisome	ECM Glycoproteins	CRIM1	cysteine rich transmembrane BMP regulator 1 (chordin-like)	2359	rs1863080	2 36526436	Other specified gastritis	535.8	Brachial circumference	301	1.34	0.03286
Core matrisome	ECM Glycoproteins	CRIM1	cysteine rich transmembrane BMP regulator 1 (chordin-like)	2359	rs7562790	2 36527059	Disease of capillaries	448	Ventricular conduction	174	1.262	0.03289
Core matrisome	ECM Glycoproteins	CRIM1	cysteine rich transmembrane BMP regulator 1 (chordin-like)	2359	rs7562790	2 36527059	Late effects of cerebrovascular disease	433.8	Ventricular conduction	675	1.136	0.03309
Core matrisome	ECM Glycoproteins	CRIM1	cysteine rich transmembrane BMP regulator 1 (chordin-like)	2359	rs1863080	2 36526436	Nonrheumatic tricuspid valve disorders	395.3	Brachial circumference	114	1.52	0.03323
Core matrisome	ECM Glycoproteins	CRIM1	cysteine rich transmembrane BMP regulator 1 (chordin-like)	2359	rs7562790	2 36527059	Aplastic anemia	284	Ventricular conduction	172	1.264	0.03324
Core matrisome	ECM Glycoproteins	CRIM1	cysteine rich transmembrane BMP regulator 1 (chordin-like)	2359	rs7562790	2 36527059	Cancer of larynx	149.4	Ventricular conduction	101	0.7241	0.03365
Core matrisome	ECM Glycoproteins	CRIM1	cysteine rich transmembrane BMP regulator 1 (chordin-like)	2359	rs7562790	2 36527059	Congenital anomalies of intestine	750.21	Ventricular conduction	25	1.827	0.03374
Core matrisome	ECM Glycoproteins	CRIM1	cysteine rich transmembrane BMP regulator 1 (chordin-like)	2359	rs7562790	2 36527059	Other disorders of ear	388	Ventricular conduction	314	1.208	0.03422
Core matrisome	ECM Glycoproteins	CRIM1	cysteine rich transmembrane BMP regulator 1 (chordin-like)	2359	rs1863080	2 36526436	Genitourinary congenital anomalies	751	Brachial circumference	152	1.436	0.03431
Core matrisome	ECM Glycoproteins	CRIM1	cysteine rich transmembrane BMP regulator 1 (chordin-like)	2359	rs7562790	2 36527059	Urinary complications	597.2	Ventricular conduction	101	0.7281	0.03438
Core matrisome	ECM Glycoproteins	CRIM1	cysteine rich transmembrane BMP regulator 1 (chordin-like)	2359	rs1863080	2 36526436	Uterine cancer	182	Brachial circumference	129	0.5578	0.0349
Core matrisome	ECM Glycoproteins	CRIM1	cysteine rich transmembrane BMP regulator 1 (chordin-like)	2359	rs7562790	2 36527059	Mucous polyp of cervix	622.2	Ventricular conduction	145	1.288	0.03513
Core matrisome	ECM Glycoproteins	CRIM1	cysteine rich transmembrane BMP regulator 1 (chordin-like)	2359	rs1863080	2 36526436	Gastritis and duodenitis	535	Brachial circumference	1061	1.184	0.03602
Core matrisome	ECM Glycoproteins	CRIM1	cysteine rich transmembrane BMP regulator 1 (chordin-like)	2359	rs1863080	2 36526436	Neck pain	761	Brachial circumference	2298	1.13	0.03613
Core matrisome	ECM Glycoproteins	CRIM1	cysteine rich transmembrane BMP regulator 1 (chordin-like)	2359	rs7562790	2 36527059	Seborheic dermatitis	690	Ventricular conduction	612	1.14	0.03625
Core matrisome	ECM Glycoproteins	CRIM1	cysteine rich transmembrane BMP regulator 1 (chordin-like)	2359	rs7562790	2 36527059	Noninflammatory disorders of vagina	619.4	Ventricular conduction	176	1.257	0.0363
Core matrisome	ECM Glycoproteins	CRIM1	cysteine rich transmembrane BMP regulator 1 (chordin-like)	2359	rs1863080	2 36526436	Pain in joint	745	Brachial circumference	7301	1.115	0.03675
Core matrisome	ECM Glycoproteins	CRIM1	cysteine rich transmembrane BMP regulator 1 (chordin-like)	2359	rs7562790	2 36527059	Spermatocele	603.2	Ventricular conduction	68	0.6638	0.03711
Core matrisome	ECM Glycoproteins	CRIM1	cysteine rich transmembrane BMP regulator 1 (chordin-like)	2359	rs1863080	2 36526436	Peripheral enthesopathies	726	Brachial circumference	4607	1.125	0.03778
Core matrisome	ECM Glycoproteins	CRIM1	cysteine rich transmembrane BMP regulator 1 (chordin-like)	2359	rs1863080	2 36526436	Other disorders of eyelids	374	Brachial circumference	1407	1.189	0.03861
Core matrisome	ECM Glycoproteins	CRIM1	cysteine rich transmembrane BMP regulator 1 (chordin-like)	2359	rs7562790	2 36527059	Swelling of limb	771.1	Ventricular conduction	706	1.126	0.03862
Core matrisome	ECM Glycoproteins	CRIM1	cysteine rich transmembrane BMP regulator 1 (chordin-like)	2359	rs7562790	2 36527059	Other derangement of joint	742.9	Ventricular conduction	249	1.206	0.04005
Core matrisome	ECM Glycoproteins	CRIM1	cysteine rich transmembrane BMP regulator 1 (chordin-like)	2359	rs1863080	2 36526436	Mastoiditis	381.3	Brachial circumference	29	1.994	0.04025
Core matrisome	ECM Glycoproteins	CRIM1	cysteine rich transmembrane BMP regulator 1 (chordin-like)	2359	rs1863080	2 36526436	Psoriasis & related disorders	696	Brachial circumference	368	1.283	0.04057
Core matrisome	ECM Glycoproteins	CRIM1	cysteine rich transmembrane BMP regulator 1 (chordin-like)	2359	rs1863080	2 36526436	Conjunctivitis, infectious	369.5	Brachial circumference	939	1.213	0.04094
Core matrisome	ECM Glycoproteins	CRIM1	cysteine rich transmembrane BMP regulator 1 (chordin-like)	2359	rs7562790	2 36527059	Umbilical hernia	550.4	Ventricular conduction	274	1.198	0.04106
Core matrisome	ECM Glycoproteins	CRIM1	cysteine rich transmembrane BMP regulator 1 (chordin-like)	2359	rs7562790	2 36527059	Hypoglycemia	251.1	Ventricular conduction	107	1.326	0.04114
Core matrisome	ECM Glycoproteins	CRIM1	cysteine rich transmembrane BMP regulator 1 (chordin-like)	2359	rs1863080	2 36526436	Retinoschisis and retinal cysts	361.2	Brachial circumference	30	2.029	0.04203
Core matrisome	ECM Glycoproteins	CRIM1	cysteine rich transmembrane BMP regulator 1 (chordin-like)	2359	rs1863080	2 36526436	Cholelithiasis	574.1	Brachial circumference	1031	1.168	0.04205
Core matrisome	ECM Glycoproteins	CRIM1	cysteine rich transmembrane BMP regulator 1 (chordin-like)	2359	rs7562790	2 36527059	Alopecia	704.1	Ventricular conduction	209	1.224	0.04229
Core matrisome	ECM Glycoproteins	CRIM1	cysteine rich transmembrane BMP regulator 1 (chordin-like)	2359	rs1863080	2 36526436	Diabetes mellitus	250	Brachial circumference	3231	1.109	0.04245
Core matrisome	ECM Glycoproteins	CRIM1	cysteine rich transmembrane BMP regulator 1 (chordin-like)	2359	rs1863080	2 36526436	Otosclerosis	383	Brachial circumference	101	1.515	0.04309
Core matrisome	ECM Glycoproteins	CRIM1	cysteine rich transmembrane BMP regulator 1 (chordin-like)	2359	rs7562790	2 36527059	Obsessive-compulsive disorder	300.3	Ventricular conduction	52	1.502	0.04323
Core matrisome	ECM Glycoproteins	CRIM1	cysteine rich transmembrane BMP regulator 1 (chordin-like)	2359	rs1863080	2 36526436	Asthma	495	Brachial circumference	1390	1.152	0.0435
Core matrisome	ECM Glycoproteins	CRIM1	cysteine rich transmembrane BMP regulator 1 (chordin-like)	2359	rs1863080	2 36526436	Fasciitis	728.7	Brachial circumference	974	1.203	0.04378
Core matrisome	ECM Glycoproteins	CRIM1	cysteine rich transmembrane BMP regulator 1 (chordin-like)	2359	rs1863080	2 36526436	Primary thrombocytopenia	287.31	Brachial circumference	66	1.64	0.04442
Core matrisome	ECM Glycoproteins	CRIM1	cysteine rich transmembrane BMP regulator 1 (chordin-like)	2359	rs7562790	2 36527059	Celiac or tropical sprue	557.1	Ventricular conduction	48	1.515	0.04471
Core matrisome	ECM Glycoproteins	CRIM1	cysteine rich transmembrane BMP regulator 1 (chordin-like)	2359	rs1863080	2 36526436	Abnormal findings on examination of urine	598	Brachial circumference	694	0.8124	0.04504
Core matrisome	ECM Glycoproteins	CRIM1	cysteine rich transmembrane BMP regulator 1 (chordin-like)	2359	rs1863080	2 36526436	Rotator cuff (capsule) sprain	840.2	Brachial circumference	568	1.247	0.04504
Core matrisome	ECM Glycoproteins	CRIM1	cysteine rich transmembrane BMP regulator 1 (chordin-like)	2359	rs1863080	2 36526436	Fever of unknown origin	783	Brachial circumference	1564	1.139	0.04523
Core matrisome	ECM Glycoproteins	CRIM1	cysteine rich transmembrane BMP regulator 1 (chordin-like)	2359	rs1863080	2 36526436	Pancytopenia	284.1	Brachial circumference	80	1.586	0.04579
Core matrisome	ECM Glycoproteins	CRIM1	cysteine rich transmembrane BMP regulator 1 (chordin-like)	2359	rs7562790	2 36527059	Chronic ulcer of leg or foot	707.2	Ventricular conduction	847	1.109	0.04592
Core matrisome	ECM Glycoproteins	CRIM1	cysteine rich transmembrane BMP regulator 1 (chordin-like)	2359	rs1863080	2 36526436	Type 2 diabetes	250.2	Brachial circumference	3122	1.109	0.04632
Core matrisome	ECM Glycoproteins	CRIM1	cysteine rich transmembrane BMP regulator 1 (chordin-like)	2359	rs7562790	2 36527059	Diverticulum of esophagus, acquired	530.6	Ventricular conduction	37	0.598	0.04666
Core matrisome	ECM Glycoproteins	CRIM1	cysteine rich transmembrane BMP regulator 1 (chordin-like)	2359	rs7562790	2 36527059	Cystic kidney disease	751.21	Ventricular conduction	75	0.7075	0.0467
Core matrisome	ECM Glycoproteins	CRIM1	cysteine rich transmembrane BMP regulator 1 (chordin-like)	2359	rs7562790	2 36527059	Cervical intraepithelial neoplasia (Cervical dysplasia)	180.3	Ventricular conduction	228	1.217	0.04688
Core matrisome	ECM Glycoproteins	CRIM1	cysteine rich transmembrane BMP regulator 1 (chordin-like)	2359	rs7562790	2 36527059	Posterior pituitary disorders	253.3	Ventricular conduction	53	0.6597	0.04764
Core matrisome	ECM Glycoproteins	CRIM1	cysteine rich transmembrane BMP regulator 1 (chordin-like)	2359	rs7562790	2 36527059	Bronchopneumonia and lung abscess	480.5	Ventricular conduction	49	1.491	0.04862
Core matrisome	ECM Glycoproteins	CRIM1	cysteine rich transmembrane BMP regulator 1 (chordin-like)	2359	rs7562790	2 36527059	Pain in limb	773	Ventricular conduction	4913	1.064	0.04886
Core matrisome	ECM Glycoproteins	CRIM1	cysteine rich transmembrane BMP regulator 1 (chordin-like)	2359	rs7562790	2 36527059	Portal hypertension	571.81	Ventricular conduction	54	1.465	0.04936
Core matrisome	ECM Glycoproteins	CRIM1	cysteine rich transmembrane BMP regulator 1 (chordin-like)	2359	rs1863080	2 36526436	Anemia NOS	285.9	Brachial circumference	2860	1.113	0.04989
Core matrisome	ECM Glycoproteins	CRIM1	cysteine rich transmembrane BMP regulator 1 (chordin-like)	2359	rs7562790	2 36527059	Abnormal sputum	516	Ventricular conduction	204	1.221	0.04992
Core matrisome	ECM Glycoproteins	DPT	dermatopontin	3011	rs1412337	1 168618641	Adverse effects of hormones and synthetic substitutes	962.3	Morbidity-free survival	25	2.693	8.154e-4
Core matrisome	ECM Glycoproteins	DPT	dermatopontin	3011	rs1412337	1 168618641	Keloid scar	701.4	Morbidity-free survival	61	1.93	9.371e-4
Core matrisome	ECM Glycoproteins	DPT	dermatopontin	3011	rs1412337	1 168618641	Torticollis	723.1	Morbidity-free survival	83	0.4571	0.003029
Core matrisome	ECM Glycoproteins	DPT	dermatopontin	3011	rs1412337	1 168618641	Other specified nonpsychotic and/or transient mental disorders	291	Morbidity-free survival	450	0.7544	0.00507
Core matrisome	ECM Glycoproteins	DPT	dermatopontin	3011	rs1412337	1 168618641	Polyarthropathy or polyarthritis involving multiple sites NOS	716.11	Morbidity-free survival	64	1.721	0.005542
Core matrisome	ECM Glycoproteins	DPT	dermatopontin	3011	rs1412337	1 168618641	Mental disorders due to brain damage	291.4	Morbidity-free survival	435	0.7634	0.008349
Core matrisome	ECM Glycoproteins	DPT	dermatopontin	3011	rs1412337	1 168618641	Retinal detachments and defects	361	Morbidity-free survival	449	1.262	0.009216
Core matrisome	ECM Glycoproteins	DPT	dermatopontin	3011	rs1412337	1 168618641	Arthropathy NOS involving multiple sites	716.91	Morbidity-free survival	72	1.637	0.01037
Core matrisome	ECM Glycoproteins	DPT	dermatopontin	3011	rs1412337	1 168618641	Inflammatory and toxic neuropathy	357	Morbidity-free survival	172	1.391	0.01055
Core matrisome	ECM Glycoproteins	DPT	dermatopontin	3011	rs1412337	1 168618641	Stricture of artery	447.1	Morbidity-free survival	241	0.7052	0.01154
Core matrisome	ECM Glycoproteins	DPT	dermatopontin	3011	rs1412337	1 168618641	Intracranial hemorrhage	430	Morbidity-free survival	194	0.6883	0.01285
Core matrisome	ECM Glycoproteins	DPT	dermatopontin	3011	rs1412337	1 168618641	Hyperglyceridemia	272.12	Morbidity-free survival	492	1.272	0.01568
Core matrisome	ECM Glycoproteins	DPT	dermatopontin	3011	rs1412337	1 168618641	Partial epilepsy	345.12	Morbidity-free survival	128	0.6332	0.01606
Core matrisome	ECM Glycoproteins	DPT	dermatopontin	3011	rs1412337	1 168618641	Rash and other nonspecific skin eruption	687.1	Morbidity-free survival	803	0.8404	0.01606
Core matrisome	ECM Glycoproteins	DPT	dermatopontin	3011	rs1412337	1 168618641	Disorders of sweat glands	705	Morbidity-free survival	303	1.276	0.01738
Core matrisome	ECM Glycoproteins	DPT	dermatopontin	3011	rs1412337	1 168618641	Age-related macular degeneration	362.29	Morbidity-free survival	749	1.225	0.01747
Core matrisome	ECM Glycoproteins	DPT	dermatopontin	3011	rs1412337	1 168618641	Failure to thrive	264.2	Morbidity-free survival	144	0.6608	0.01771
Core matrisome	ECM Glycoproteins	DPT	dermatopontin	3011	rs1412337	1 168618641	Convulsions	345.3	Morbidity-free survival	461	0.8039	0.01781
Core matrisome	ECM Glycoproteins	DPT	dermatopontin	3011	rs1412337	1 168618641	Cancer of brain and nervous system	191.1	Morbidity-free survival	68	0.5163	0.019
Core matrisome	ECM Glycoproteins	DPT	dermatopontin	3011	rs1412337	1 168618641	Acute bronchospasm	498	Morbidity-free survival	26	2.061	0.01943
Core matrisome	ECM Glycoproteins	DPT	dermatopontin	3011	rs1412337	1 168618641	Fuchs' dystrophy	364.51	Morbidity-free survival	107	1.485	0.01989
Core matrisome	ECM Glycoproteins	DPT	dermatopontin	3011	rs1412337	1 168618641	Gout	274.1	Morbidity-free survival	769	1.165	0.02017
Core matrisome	ECM Glycoproteins	DPT	dermatopontin	3011	rs1412337	1 168618641	Other cells and casts in urine	598.4	Morbidity-free survival	141	0.6641	0.02117
Core matrisome	ECM Glycoproteins	DPT	dermatopontin	3011	rs1412337	1 168618641	Osteoarthrosis, generalized	740.2	Morbidity-free survival	530	1.215	0.02175
Core matrisome	ECM Glycoproteins	DPT	dermatopontin	3011	rs1412337	1 168618641	Infestation	132	Morbidity-free survival	55	0.4906	0.02533
Core matrisome	ECM Glycoproteins	DPT	dermatopontin	3011	rs1412337	1 168618641	Acute renal failure	585.1	Morbidity-free survival	797	0.8521	0.02607
Core matrisome	ECM Glycoproteins	DPT	dermatopontin	3011	rs1412337	1 168618641	Subdural hemorrhage	430.3	Morbidity-free survival	73	0.5573	0.02826
Core matrisome	ECM Glycoproteins	DPT	dermatopontin	3011	rs1412337	1 168618641	Epilepsy, recurrent seizures, convulsions	345	Morbidity-free survival	512	0.8275	0.02902
Core matrisome	ECM Glycoproteins	DPT	dermatopontin	3011	rs1412337	1 168618641	Excessive or frequent menstruation	626.12	Morbidity-free survival	464	1.311	0.03015
Core matrisome	ECM Glycoproteins	DPT	dermatopontin	3011	rs1412337	1 168618641	Acute, but ill-defined cerebrovascular disease	433.6	Morbidity-free survival	579	0.8326	0.03036
Core matrisome	ECM Glycoproteins	DPT	dermatopontin	3011	rs1412337	1 168618641	Acute osteomyelitis	710.11	Morbidity-free survival	64	1.543	0.03207
Core matrisome	ECM Glycoproteins	DPT	dermatopontin	3011	rs1412337	1 168618641	Gouty arthropathy	274.11	Morbidity-free survival	226	1.279	0.03236
Core matrisome	ECM Glycoproteins	DPT	dermatopontin	3011	rs1412337	1 168618641	Toxic effect of venom	913	Morbidity-free survival	89	0.612	0.03243
Core matrisome	ECM Glycoproteins	DPT	dermatopontin	3011	rs1412337	1 168618641	Muscular wasting and disuse atrophy	772.1	Morbidity-free survival	67	1.53	0.03246
Core matrisome	ECM Glycoproteins	DPT	dermatopontin	3011	rs1412337	1 168618641	Brain cancer	191.11	Morbidity-free survival	61	0.5378	0.03431
Core matrisome	ECM Glycoproteins	DPT	dermatopontin	3011	rs1412337	1 168618641	Stricture and stenosis of esophagus	530.3	Morbidity-free survival	280	0.7758	0.03596
Core matrisome	ECM Glycoproteins	DPT	dermatopontin	3011	rs1412337	1 168618641	Lack of normal physiological development	264	Morbidity-free survival	165	0.7212	0.0383
Core matrisome	ECM Glycoproteins	DPT	dermatopontin	3011	rs1412337	1 168618641	Cachexia	260.1	Morbidity-free survival	32	0.4089	0.0385
Core matrisome	ECM Glycoproteins	DPT	dermatopontin	3011	rs1412337	1 168618641	Subdural hemorrhage (injury)	818.1	Morbidity-free survival	59	0.5442	0.03888
Core matrisome	ECM Glycoproteins	DPT	dermatopontin	3011	rs1412337	1 168618641	Other disorders of arteries and arterioles	447	Morbidity-free survival	354	0.7946	0.03952
Core matrisome	ECM Glycoproteins	DPT	dermatopontin	3011	rs1412337	1 168618641	Intracranial hemorrhage (injury)	818	Morbidity-free survival	101	0.6488	0.03985
Core matrisome	ECM Glycoproteins	DPT	dermatopontin	3011	rs1412337	1 168618641	Joint/ligament sprain	840.3	Morbidity-free survival	228	1.278	0.04104
Core matrisome	ECM Glycoproteins	DPT	dermatopontin	3011	rs1412337	1 168618641	Nasal polyps	471	Morbidity-free survival	196	1.293	0.04147
Core matrisome	ECM Glycoproteins	DPT	dermatopontin	3011	rs1412337	1 168618641	Multiple sclerosis	335	Morbidity-free survival	83	0.6145	0.04194
Core matrisome	ECM Glycoproteins	DPT	dermatopontin	3011	rs1412337	1 168618641	Noninfectious disorders of lymphatic channels	450	Morbidity-free survival	192	1.282	0.04235
Core matrisome	ECM Glycoproteins	DPT	dermatopontin	3011	rs1412337	1 168618641	Vaginal enterocele, congenital or acquired	618.6	Morbidity-free survival	96	0.647	0.04289
Core matrisome	ECM Glycoproteins	DPT	dermatopontin	3011	rs1412337	1 168618641	Retinal vascular changes and abnomalities	362.4	Morbidity-free survival	496	1.201	0.04323
Core matrisome	ECM Glycoproteins	DPT	dermatopontin	3011	rs1412337	1 168618641	Crystal arthropathies	274.2	Morbidity-free survival	171	0.7293	0.0442
Core matrisome	ECM Glycoproteins	DPT	dermatopontin	3011	rs1412337	1 168618641	Cervicitis and endocervicitis	614.51	Morbidity-free survival	72	1.482	0.0454
Core matrisome	ECM Glycoproteins	DPT	dermatopontin	3011	rs1412337	1 168618641	Duodenal ulcer	531.3	Morbidity-free survival	209	0.7516	0.0454
Core matrisome	ECM Glycoproteins	DPT	dermatopontin	3011	rs1412337	1 168618641	Postoperative infection	080	Morbidity-free survival	446	1.181	0.04557
Core matrisome	ECM Glycoproteins	DPT	dermatopontin	3011	rs1412337	1 168618641	Transient alteration of awareness	292.5	Morbidity-free survival	119	1.355	0.04689
Core matrisome	ECM Glycoproteins	DPT	dermatopontin	3011	rs1412337	1 168618641	Chondrocalcinosis	274.21	Morbidity-free survival	167	0.73	0.04716
Core matrisome	ECM Glycoproteins	DPT	dermatopontin	3011	rs1412337	1 168618641	Corneal dystrophy	364.5	Morbidity-free survival	253	1.262	0.04747
Core matrisome	ECM Glycoproteins	DPT	dermatopontin	3011	rs1412337	1 168618641	Esophageal atresia/tracheoesophageal fistula	750.11	Morbidity-free survival	54	1.537	0.04787
Core matrisome	ECM Glycoproteins	DPT	dermatopontin	3011	rs1412337	1 168618641	Cervical radiculitis	765	Morbidity-free survival	634	0.8546	0.04927
Core matrisome	ECM Glycoproteins	EDIL3	EGF-like repeats and discoidin I-like domains 3	3173	rs347344	5 83499643	Skin cancer	172	Chemerin levels	2161	0.8814	3.653e-4
Core matrisome	ECM Glycoproteins	EDIL3	EGF-like repeats and discoidin I-like domains 3	3173	rs347344	5 83499643	Non-melanoma skin cancer	172.2	Chemerin levels	1931	0.8773	4.552e-4
Core matrisome	ECM Glycoproteins	EDIL3	EGF-like repeats and discoidin I-like domains 3	3173	rs347344	5 83499643	Abnormal findings on study of brain, nervous system	346	Chemerin levels	87	1.703	6.542e-4
Core matrisome	ECM Glycoproteins	EDIL3	EGF-like repeats and discoidin I-like domains 3	3173	rs347344	5 83499643	Alkalosis	276.42	Chemerin levels	42	1.963	0.002739
Core matrisome	ECM Glycoproteins	EDIL3	EGF-like repeats and discoidin I-like domains 3	3173	rs347344	5 83499643	Corneal degenerations	364.4	Chemerin levels	184	1.384	0.003295
Core matrisome	ECM Glycoproteins	EDIL3	EGF-like repeats and discoidin I-like domains 3	3173	rs347344	5 83499643	Carcinoma in situ of skin	172.3	Chemerin levels	325	0.7835	0.003889
Core matrisome	ECM Glycoproteins	EDIL3	EGF-like repeats and discoidin I-like domains 3	3173	rs347344	5 83499643	Renal failure NOS	585.2	Chemerin levels	194	1.346	0.004322
Core matrisome	ECM Glycoproteins	EDIL3	EGF-like repeats and discoidin I-like domains 3	3173	rs347344	5 83499643	Chronic ulcer of leg or foot	707.2	Chemerin levels	847	1.158	0.004478
Core matrisome	ECM Glycoproteins	EDIL3	EGF-like repeats and discoidin I-like domains 3	3173	rs347344	5 83499643	Asthma with exacerbation	495.2	Chemerin levels	155	1.384	0.004943
Core matrisome	ECM Glycoproteins	EDIL3	EGF-like repeats and discoidin I-like domains 3	3173	rs347344	5 83499643	Other abnormal blood chemistry	790.6	Chemerin levels	1853	1.12	0.005024
Core matrisome	ECM Glycoproteins	EDIL3	EGF-like repeats and discoidin I-like domains 3	3173	rs347344	5 83499643	Dentofacial anomalies, including malocclusion	524	Chemerin levels	81	0.6347	0.00569
Core matrisome	ECM Glycoproteins	EDIL3	EGF-like repeats and discoidin I-like domains 3	3173	rs347344	5 83499643	Renal dialysis	585.31	Chemerin levels	127	1.417	0.005982
Core matrisome	ECM Glycoproteins	EDIL3	EGF-like repeats and discoidin I-like domains 3	3173	rs347344	5 83499643	Respiratory insufficiency	509.2	Chemerin levels	236	1.293	0.006372
Core matrisome	ECM Glycoproteins	EDIL3	EGF-like repeats and discoidin I-like domains 3	3173	rs347344	5 83499643	Anemia in chronic kidney disease	285.21	Chemerin levels	230	1.3	0.00671
Core matrisome	ECM Glycoproteins	EDIL3	EGF-like repeats and discoidin I-like domains 3	3173	rs347344	5 83499643	Prurigo	695.6	Chemerin levels	274	1.277	0.007063
Core matrisome	ECM Glycoproteins	EDIL3	EGF-like repeats and discoidin I-like domains 3	3173	rs347344	5 83499643	Balanoposthitis	601.4	Chemerin levels	67	1.661	0.008454
Core matrisome	ECM Glycoproteins	EDIL3	EGF-like repeats and discoidin I-like domains 3	3173	rs347344	5 83499643	Stiffness of joint	741.2	Chemerin levels	504	0.8364	0.008615
Core matrisome	ECM Glycoproteins	EDIL3	EGF-like repeats and discoidin I-like domains 3	3173	rs347344	5 83499643	Methicillin resistant Staphylococcus aureus	041.12	Chemerin levels	40	1.827	0.009066
Core matrisome	ECM Glycoproteins	EDIL3	EGF-like repeats and discoidin I-like domains 3	3173	rs347344	5 83499643	Disorders of adrenal glands	255	Chemerin levels	193	1.307	0.009219
Core matrisome	ECM Glycoproteins	EDIL3	EGF-like repeats and discoidin I-like domains 3	3173	rs347344	5 83499643	Sexual and gender identity disorders	302	Chemerin levels	163	1.347	0.01147
Core matrisome	ECM Glycoproteins	EDIL3	EGF-like repeats and discoidin I-like domains 3	3173	rs347344	5 83499643	Asthma	495	Chemerin levels	1390	1.113	0.0122
Core matrisome	ECM Glycoproteins	EDIL3	EGF-like repeats and discoidin I-like domains 3	3173	rs347344	5 83499643	Other disorders of adrenal glands	255.9	Chemerin levels	88	1.45	0.01527
Core matrisome	ECM Glycoproteins	EDIL3	EGF-like repeats and discoidin I-like domains 3	3173	rs347344	5 83499643	Microscopic hematuria	593.2	Chemerin levels	93	0.6884	0.01575
Core matrisome	ECM Glycoproteins	EDIL3	EGF-like repeats and discoidin I-like domains 3	3173	rs347344	5 83499643	Other disorders of bone and cartilage	733	Chemerin levels	427	1.185	0.01692
Core matrisome	ECM Glycoproteins	EDIL3	EGF-like repeats and discoidin I-like domains 3	3173	rs347344	5 83499643	Mastoiditis	381.3	Chemerin levels	29	1.888	0.01844
Core matrisome	ECM Glycoproteins	EDIL3	EGF-like repeats and discoidin I-like domains 3	3173	rs347344	5 83499643	Known or suspected fetal abnormality	655	Chemerin levels	69	1.531	0.01904
Core matrisome	ECM Glycoproteins	EDIL3	EGF-like repeats and discoidin I-like domains 3	3173	rs347344	5 83499643	Type 1 diabetic ketoacidosis	250.11	Chemerin levels	127	1.345	0.01932
Core matrisome	ECM Glycoproteins	EDIL3	EGF-like repeats and discoidin I-like domains 3	3173	rs347344	5 83499643	Hematemesis	578.1	Chemerin levels	70	1.489	0.02025
Core matrisome	ECM Glycoproteins	EDIL3	EGF-like repeats and discoidin I-like domains 3	3173	rs347344	5 83499643	Chronic bronchitis	496.2	Chemerin levels	596	1.159	0.02112
Core matrisome	ECM Glycoproteins	EDIL3	EGF-like repeats and discoidin I-like domains 3	3173	rs347344	5 83499643	Disorders of sacrum	724.1	Chemerin levels	358	0.8293	0.02115
Core matrisome	ECM Glycoproteins	EDIL3	EGF-like repeats and discoidin I-like domains 3	3173	rs347344	5 83499643	Poisoning by agents primarily affecting blood constituents	964	Chemerin levels	71	0.6616	0.02186
Core matrisome	ECM Glycoproteins	EDIL3	EGF-like repeats and discoidin I-like domains 3	3173	rs347344	5 83499643	Sarcoidosis	697	Chemerin levels	69	0.662	0.02222
Core matrisome	ECM Glycoproteins	EDIL3	EGF-like repeats and discoidin I-like domains 3	3173	rs347344	5 83499643	Schizoid personality disorder	301.1	Chemerin levels	58	0.6317	0.02294
Core matrisome	ECM Glycoproteins	EDIL3	EGF-like repeats and discoidin I-like domains 3	3173	rs347344	5 83499643	Amblyopia	368.1	Chemerin levels	175	1.28	0.02317
Core matrisome	ECM Glycoproteins	EDIL3	EGF-like repeats and discoidin I-like domains 3	3173	rs347344	5 83499643	Disease of tricuspid valve	394.7	Chemerin levels	338	0.8237	0.02413
Core matrisome	ECM Glycoproteins	EDIL3	EGF-like repeats and discoidin I-like domains 3	3173	rs347344	5 83499643	Other specified disorders of plasma protein metabolism	270.38	Chemerin levels	28	1.862	0.0243
Core matrisome	ECM Glycoproteins	EDIL3	EGF-like repeats and discoidin I-like domains 3	3173	rs347344	5 83499643	Musculoskeletal symptoms referable to limbs	771	Chemerin levels	314	1.208	0.02495
Core matrisome	ECM Glycoproteins	EDIL3	EGF-like repeats and discoidin I-like domains 3	3173	rs347344	5 83499643	Hypertension	401	Chemerin levels	8185	1.069	0.02551
Core matrisome	ECM Glycoproteins	EDIL3	EGF-like repeats and discoidin I-like domains 3	3173	rs347344	5 83499643	Polyp of corpus uteri	622.1	Chemerin levels	148	0.7674	0.02729
Core matrisome	ECM Glycoproteins	EDIL3	EGF-like repeats and discoidin I-like domains 3	3173	rs347344	5 83499643	Essential hypertension	401.1	Chemerin levels	8134	1.068	0.02729
Core matrisome	ECM Glycoproteins	EDIL3	EGF-like repeats and discoidin I-like domains 3	3173	rs347344	5 83499643	Orchitis and epididymitis	601.3	Chemerin levels	137	1.35	0.02842
Core matrisome	ECM Glycoproteins	EDIL3	EGF-like repeats and discoidin I-like domains 3	3173	rs347344	5 83499643	Secondary malignant neoplasm	198	Chemerin levels	757	0.8873	0.02941
Core matrisome	ECM Glycoproteins	EDIL3	EGF-like repeats and discoidin I-like domains 3	3173	rs347344	5 83499643	Subjective visual disturbances	368.9	Chemerin levels	461	0.8579	0.0298
Core matrisome	ECM Glycoproteins	EDIL3	EGF-like repeats and discoidin I-like domains 3	3173	rs347344	5 83499643	Decreased libido	302.1	Chemerin levels	34	1.721	0.02982
Core matrisome	ECM Glycoproteins	EDIL3	EGF-like repeats and discoidin I-like domains 3	3173	rs347344	5 83499643	Type 2 diabetic ketoacidosis	250.21	Chemerin levels	1112	1.106	0.03144
Core matrisome	ECM Glycoproteins	EDIL3	EGF-like repeats and discoidin I-like domains 3	3173	rs347344	5 83499643	Magnesium metabolism disorder	275.3	Chemerin levels	198	1.248	0.0317
Core matrisome	ECM Glycoproteins	EDIL3	EGF-like repeats and discoidin I-like domains 3	3173	rs347344	5 83499643	Oral aphthae	528.12	Chemerin levels	62	1.473	0.03177
Core matrisome	ECM Glycoproteins	EDIL3	EGF-like repeats and discoidin I-like domains 3	3173	rs347344	5 83499643	Unspecified erythematous condition	695.9	Chemerin levels	101	1.365	0.03214
Core matrisome	ECM Glycoproteins	EDIL3	EGF-like repeats and discoidin I-like domains 3	3173	rs347344	5 83499643	Diseases of the salivary glands	527	Chemerin levels	238	0.8154	0.03354
Core matrisome	ECM Glycoproteins	EDIL3	EGF-like repeats and discoidin I-like domains 3	3173	rs347344	5 83499643	Fuchs' dystrophy	364.51	Chemerin levels	107	1.359	0.033890000000000003
Core matrisome	ECM Glycoproteins	EDIL3	EGF-like repeats and discoidin I-like domains 3	3173	rs347344	5 83499643	Sprains and strains	840	Chemerin levels	2841	0.9233	0.03488
Core matrisome	ECM Glycoproteins	EDIL3	EGF-like repeats and discoidin I-like domains 3	3173	rs347344	5 83499643	Choroidal degenerations	363.4	Chemerin levels	133	1.319	0.03605
Core matrisome	ECM Glycoproteins	EDIL3	EGF-like repeats and discoidin I-like domains 3	3173	rs347344	5 83499643	Otalgia	382	Chemerin levels	297	1.192	0.03766
Core matrisome	ECM Glycoproteins	EDIL3	EGF-like repeats and discoidin I-like domains 3	3173	rs347344	5 83499643	Scoliosis	737.3	Chemerin levels	229	1.219	0.03912
Core matrisome	ECM Glycoproteins	EDIL3	EGF-like repeats and discoidin I-like domains 3	3173	rs347344	5 83499643	Other congenital anomalies of skin	691	Chemerin levels	122	1.308	0.0394
Core matrisome	ECM Glycoproteins	EDIL3	EGF-like repeats and discoidin I-like domains 3	3173	rs347344	5 83499643	Varicose veins of lower extremity	454.1	Chemerin levels	1081	1.118	0.03943
Core matrisome	ECM Glycoproteins	EDIL3	EGF-like repeats and discoidin I-like domains 3	3173	rs347344	5 83499643	Noninflammatory disorders of vulva and perineum	619.5	Chemerin levels	93	1.359	0.03965
Core matrisome	ECM Glycoproteins	EDIL3	EGF-like repeats and discoidin I-like domains 3	3173	rs347344	5 83499643	Disorders of cornea	364	Chemerin levels	662	1.142	0.03981
Core matrisome	ECM Glycoproteins	EDIL3	EGF-like repeats and discoidin I-like domains 3	3173	rs347344	5 83499643	Vitamin B12 deficiency anemia	281.12	Chemerin levels	84	0.7162	0.04027
Core matrisome	ECM Glycoproteins	EDIL3	EGF-like repeats and discoidin I-like domains 3	3173	rs347344	5 83499643	Symptoms involving cardiovascular system	429.3	Chemerin levels	880	1.118	0.04053
Core matrisome	ECM Glycoproteins	EDIL3	EGF-like repeats and discoidin I-like domains 3	3173	rs347344	5 83499643	Posterior pituitary disorders	253.3	Chemerin levels	53	0.6575	0.04073
Core matrisome	ECM Glycoproteins	EDIL3	EGF-like repeats and discoidin I-like domains 3	3173	rs347344	5 83499643	Subdural hemorrhage (injury)	818.1	Chemerin levels	59	0.6703	0.04089
Core matrisome	ECM Glycoproteins	EDIL3	EGF-like repeats and discoidin I-like domains 3	3173	rs347344	5 83499643	Peripheral retinal degenerations	362.6	Chemerin levels	254	1.215	0.04094
Core matrisome	ECM Glycoproteins	EDIL3	EGF-like repeats and discoidin I-like domains 3	3173	rs347344	5 83499643	Hypopotassemia	276.14	Chemerin levels	1220	1.098	0.04239
Core matrisome	ECM Glycoproteins	EDIL3	EGF-like repeats and discoidin I-like domains 3	3173	rs347344	5 83499643	Chronic rheumatic disease of the heart valves	394	Chemerin levels	860	0.8958	0.04335
Core matrisome	ECM Glycoproteins	EDIL3	EGF-like repeats and discoidin I-like domains 3	3173	rs347344	5 83499643	Other disorders of circulatory system	459	Chemerin levels	979	0.9053	0.0455
Core matrisome	ECM Glycoproteins	EDIL3	EGF-like repeats and discoidin I-like domains 3	3173	rs347344	5 83499643	Anomalies of tooth position/malocclusion	524.3	Chemerin levels	61	0.689	0.04585
Core matrisome	ECM Glycoproteins	EDIL3	EGF-like repeats and discoidin I-like domains 3	3173	rs347344	5 83499643	Lipoid metabolism disorder NOS	272.9	Chemerin levels	598	1.191	0.04639
Core matrisome	ECM Glycoproteins	EDIL3	EGF-like repeats and discoidin I-like domains 3	3173	rs347344	5 83499643	Right bundle branch block	426.31	Chemerin levels	314	0.8346	0.04767
Core matrisome	ECM Glycoproteins	EDIL3	EGF-like repeats and discoidin I-like domains 3	3173	rs347344	5 83499643	Abnormal function study of cardiovascular system	429.2	Chemerin levels	708	1.123	0.04881
Core matrisome	ECM Glycoproteins	EDIL3	EGF-like repeats and discoidin I-like domains 3	3173	rs347344	5 83499643	Postinflammatory pulmonary fibrosis	502	Chemerin levels	284	1.186	0.04972
Core matrisome	ECM Glycoproteins	EDIL3	EGF-like repeats and discoidin I-like domains 3	3173	rs347344	5 83499643	Abnormality of gait	350.2	Chemerin levels	1304	0.9151	0.04993
Core matrisome	ECM Glycoproteins	EFEMP1	EGF-containing fibulin-like extracellular matrix protein 1	3218	rs3791679	2 56096892	Inguinal hernia	550.1	Height	983	0.7946	2.935e-4
Core matrisome	ECM Glycoproteins	EFEMP1	EGF-containing fibulin-like extracellular matrix protein 1	3218	rs3791679	2 56096892	Hematemesis	578.1	Height	70	1.843	6.522e-4
Core matrisome	ECM Glycoproteins	EFEMP1	EGF-containing fibulin-like extracellular matrix protein 1	3218	rs7577894	2 56008904	Acquired deformities of finger	736.2	Amyotrophic lateral sclerosis	113	1.595	6.814e-4
Core matrisome	ECM Glycoproteins	EFEMP1	EGF-containing fibulin-like extracellular matrix protein 1	3218	rs3791679	2 56096892	Chronic venous insufficiency	456	Height	766	0.7744	9.198e-4
Core matrisome	ECM Glycoproteins	EFEMP1	EGF-containing fibulin-like extracellular matrix protein 1	3218	rs3791679	2 56096892	History of diseases of digestive system	564.9	Height	56	0.4067	0.001956
Core matrisome	ECM Glycoproteins	EFEMP1	EGF-containing fibulin-like extracellular matrix protein 1	3218	rs3791679	2 56096892	Other cardiac conduction disorders	426.8	Height	52	1.869	0.003366
Core matrisome	ECM Glycoproteins	EFEMP1	EGF-containing fibulin-like extracellular matrix protein 1	3218	rs7577894	2 56008904	Postnasal drip	475.9	Amyotrophic lateral sclerosis	47	0.507	0.003879
Core matrisome	ECM Glycoproteins	EFEMP1	EGF-containing fibulin-like extracellular matrix protein 1	3218	rs3791679	2 56096892	Abdominal hernia	550	Height	2499	0.8924	0.003902
Core matrisome	ECM Glycoproteins	EFEMP1	EGF-containing fibulin-like extracellular matrix protein 1	3218	rs3791679	2 56096892	Multiple sclerosis	335	Height	83	1.619	0.003912
Core matrisome	ECM Glycoproteins	EFEMP1	EGF-containing fibulin-like extracellular matrix protein 1	3218	rs3791679	2 56096892	Symptoms involving urinary system	599.8	Height	343	0.744	0.003956
Core matrisome	ECM Glycoproteins	EFEMP1	EGF-containing fibulin-like extracellular matrix protein 1	3218	rs7577894	2 56008904	Hematemesis	578.1	Amyotrophic lateral sclerosis	70	1.634	0.004805
Core matrisome	ECM Glycoproteins	EFEMP1	EGF-containing fibulin-like extracellular matrix protein 1	3218	rs7577894	2 56008904	Neoplasm of unspecified nature of digestive system	158	Amyotrophic lateral sclerosis	123	1.441	0.004964
Core matrisome	ECM Glycoproteins	EFEMP1	EGF-containing fibulin-like extracellular matrix protein 1	3218	rs3791679	2 56096892	Stomach cancer	151	Height	51	1.793	0.005182
Core matrisome	ECM Glycoproteins	EFEMP1	EGF-containing fibulin-like extracellular matrix protein 1	3218	rs3791679	2 56096892	Disorders of liver	573	Height	1706	1.129	0.005672
Core matrisome	ECM Glycoproteins	EFEMP1	EGF-containing fibulin-like extracellular matrix protein 1	3218	rs3791679	2 56096892	Adjustment reaction	304	Height	1056	0.8428	0.005758
Core matrisome	ECM Glycoproteins	EFEMP1	EGF-containing fibulin-like extracellular matrix protein 1	3218	rs3791679	2 56096892	Elevated levels of transaminase or lactic acid dehydrogenase	573.91	Height	522	1.226	0.005843
Core matrisome	ECM Glycoproteins	EFEMP1	EGF-containing fibulin-like extracellular matrix protein 1	3218	rs3791679	2 56096892	Diseases of pulp and periapical tissues	522	Height	530	0.79990000000000006	0.006009
Core matrisome	ECM Glycoproteins	EFEMP1	EGF-containing fibulin-like extracellular matrix protein 1	3218	rs3791679	2 56096892	Renal failure	585	Height	2061	1.122	0.006091
Core matrisome	ECM Glycoproteins	EFEMP1	EGF-containing fibulin-like extracellular matrix protein 1	3218	rs7577894	2 56008904	Complications of gastrostomy, colostomy and enterostomy	536.7	Amyotrophic lateral sclerosis	35	1.927	0.007296
Core matrisome	ECM Glycoproteins	EFEMP1	EGF-containing fibulin-like extracellular matrix protein 1	3218	rs7577894	2 56008904	Unequal leg length (acquired)	736.6	Amyotrophic lateral sclerosis	109	1.454	0.007713
Core matrisome	ECM Glycoproteins	EFEMP1	EGF-containing fibulin-like extracellular matrix protein 1	3218	rs7577894	2 56008904	Barrett's esophagus	530.13	Amyotrophic lateral sclerosis	153	1.368	0.007864
Core matrisome	ECM Glycoproteins	EFEMP1	EGF-containing fibulin-like extracellular matrix protein 1	3218	rs7577894	2 56008904	Idiopathic fibrosing alveolitis	504.1	Amyotrophic lateral sclerosis	42	0.5181	0.008191
Core matrisome	ECM Glycoproteins	EFEMP1	EGF-containing fibulin-like extracellular matrix protein 1	3218	rs3791679	2 56096892	Other disorders of prostate	602	Height	293	0.7175	0.008899
Core matrisome	ECM Glycoproteins	EFEMP1	EGF-containing fibulin-like extracellular matrix protein 1	3218	rs3791679	2 56096892	Abnormal serum enzyme levels	573.9	Height	999	1.159	0.008902
Core matrisome	ECM Glycoproteins	EFEMP1	EGF-containing fibulin-like extracellular matrix protein 1	3218	rs7577894	2 56008904	Psoriasis vulgaris	696.41	Amyotrophic lateral sclerosis	311	1.241	0.008973
Core matrisome	ECM Glycoproteins	EFEMP1	EGF-containing fibulin-like extracellular matrix protein 1	3218	rs7577894	2 56008904	Other cells and casts in urine	598.4	Amyotrophic lateral sclerosis	141	0.7041	0.009932
Core matrisome	ECM Glycoproteins	EFEMP1	EGF-containing fibulin-like extracellular matrix protein 1	3218	rs3791679	2 56096892	Retention of urine	599.2	Height	1095	0.86	0.01032
Core matrisome	ECM Glycoproteins	EFEMP1	EGF-containing fibulin-like extracellular matrix protein 1	3218	rs7577894	2 56008904	Polyp of female genital organs	622	Amyotrophic lateral sclerosis	312	1.24	0.01044
Core matrisome	ECM Glycoproteins	EFEMP1	EGF-containing fibulin-like extracellular matrix protein 1	3218	rs3791679	2 56096892	Periapical abscess	522.5	Height	481	0.8051	0.01055
Core matrisome	ECM Glycoproteins	EFEMP1	EGF-containing fibulin-like extracellular matrix protein 1	3218	rs3791679	2 56096892	Acute renal failure	585.1	Height	797	1.171	0.01063
Core matrisome	ECM Glycoproteins	EFEMP1	EGF-containing fibulin-like extracellular matrix protein 1	3218	rs7577894	2 56008904	Vascular disorders of kidney/hypertrophy	586.3	Amyotrophic lateral sclerosis	29	0.4472	0.0107
Core matrisome	ECM Glycoproteins	EFEMP1	EGF-containing fibulin-like extracellular matrix protein 1	3218	rs7577894	2 56008904	Acquired spondylolisthesis	738.4	Amyotrophic lateral sclerosis	227	1.279	0.01112
Core matrisome	ECM Glycoproteins	EFEMP1	EGF-containing fibulin-like extracellular matrix protein 1	3218	rs3791679	2 56096892	Disorders of muscle, ligament, and fascia	728	Height	1031	1.167	0.0115
Core matrisome	ECM Glycoproteins	EFEMP1	EGF-containing fibulin-like extracellular matrix protein 1	3218	rs3791679	2 56096892	Localized adiposity	278.3	Height	37	0.4041	0.01201
Core matrisome	ECM Glycoproteins	EFEMP1	EGF-containing fibulin-like extracellular matrix protein 1	3218	rs3791679	2 56096892	Unequal leg length (acquired)	736.6	Height	109	1.461	0.01212
Core matrisome	ECM Glycoproteins	EFEMP1	EGF-containing fibulin-like extracellular matrix protein 1	3218	rs3791679	2 56096892	Secondary malignant neoplasm of liver	198.4	Height	154	1.371	0.01236
Core matrisome	ECM Glycoproteins	EFEMP1	EGF-containing fibulin-like extracellular matrix protein 1	3218	rs7577894	2 56008904	Benign neoplasm of other parts of digestive system	211	Amyotrophic lateral sclerosis	204	1.287	0.01245
Core matrisome	ECM Glycoproteins	EFEMP1	EGF-containing fibulin-like extracellular matrix protein 1	3218	rs3791679	2 56096892	Conjunctivitis, infectious	369.5	Height	939	1.17	0.01327
Core matrisome	ECM Glycoproteins	EFEMP1	EGF-containing fibulin-like extracellular matrix protein 1	3218	rs3791679	2 56096892	Photodermatitis & sunburn	938	Height	747	1.182	0.0134
Core matrisome	ECM Glycoproteins	EFEMP1	EGF-containing fibulin-like extracellular matrix protein 1	3218	rs7577894	2 56008904	Reflux esophagitis	530.14	Amyotrophic lateral sclerosis	459	1.188	0.0145
Core matrisome	ECM Glycoproteins	EFEMP1	EGF-containing fibulin-like extracellular matrix protein 1	3218	rs3791679	2 56096892	Elevated prostate specific antigen	796	Height	840	0.8303	0.0145
Core matrisome	ECM Glycoproteins	EFEMP1	EGF-containing fibulin-like extracellular matrix protein 1	3218	rs7577894	2 56008904	Malignant neoplasm of ovary	184.11	Amyotrophic lateral sclerosis	58	0.6085	0.01464
Core matrisome	ECM Glycoproteins	EFEMP1	EGF-containing fibulin-like extracellular matrix protein 1	3218	rs3791679	2 56096892	Acquired absence of breast	175	Height	229	1.31	0.01537
Core matrisome	ECM Glycoproteins	EFEMP1	EGF-containing fibulin-like extracellular matrix protein 1	3218	rs3791679	2 56096892	Hypersomnia	327.1	Height	102	1.446	0.01584
Core matrisome	ECM Glycoproteins	EFEMP1	EGF-containing fibulin-like extracellular matrix protein 1	3218	rs7577894	2 56008904	Cardiomegaly	416	Amyotrophic lateral sclerosis	840	1.137	0.01592
Core matrisome	ECM Glycoproteins	EFEMP1	EGF-containing fibulin-like extracellular matrix protein 1	3218	rs7577894	2 56008904	Acute renal failure	585.1	Amyotrophic lateral sclerosis	797	1.142	0.01599
Core matrisome	ECM Glycoproteins	EFEMP1	EGF-containing fibulin-like extracellular matrix protein 1	3218	rs3791679	2 56096892	Benign neoplasm of other parts of digestive system	211	Height	204	1.303	0.01639
Core matrisome	ECM Glycoproteins	EFEMP1	EGF-containing fibulin-like extracellular matrix protein 1	3218	rs3791679	2 56096892	Infection of the eye	369	Height	1229	1.148	0.01657
Core matrisome	ECM Glycoproteins	EFEMP1	EGF-containing fibulin-like extracellular matrix protein 1	3218	rs7577894	2 56008904	Polyp of corpus uteri	622.1	Amyotrophic lateral sclerosis	148	1.326	0.01682
Core matrisome	ECM Glycoproteins	EFEMP1	EGF-containing fibulin-like extracellular matrix protein 1	3218	rs3791679	2 56096892	Peripheral or central vertigo	386.2	Height	481	0.8204	0.01684
Core matrisome	ECM Glycoproteins	EFEMP1	EGF-containing fibulin-like extracellular matrix protein 1	3218	rs7577894	2 56008904	Dyshidrosis	705.1	Amyotrophic lateral sclerosis	68	0.6379	0.01717
Core matrisome	ECM Glycoproteins	EFEMP1	EGF-containing fibulin-like extracellular matrix protein 1	3218	rs3791679	2 56096892	Cerebral ischemia	433.3	Height	1005	0.8686	0.0172
Core matrisome	ECM Glycoproteins	EFEMP1	EGF-containing fibulin-like extracellular matrix protein 1	3218	rs7577894	2 56008904	Arterial embolism and thrombosis	444	Amyotrophic lateral sclerosis	383	0.8263	0.01819
Core matrisome	ECM Glycoproteins	EFEMP1	EGF-containing fibulin-like extracellular matrix protein 1	3218	rs7577894	2 56008904	Senile dementia	290.13	Amyotrophic lateral sclerosis	495	1.198	0.01843
Core matrisome	ECM Glycoproteins	EFEMP1	EGF-containing fibulin-like extracellular matrix protein 1	3218	rs7577894	2 56008904	Acquired deformities of limbs	736	Amyotrophic lateral sclerosis	436	1.19	0.01847
Core matrisome	ECM Glycoproteins	EFEMP1	EGF-containing fibulin-like extracellular matrix protein 1	3218	rs3791679	2 56096892	Acute bronchospasm	498	Height	26	1.969	0.01894
Core matrisome	ECM Glycoproteins	EFEMP1	EGF-containing fibulin-like extracellular matrix protein 1	3218	rs7577894	2 56008904	Psoriasis	696.4	Amyotrophic lateral sclerosis	327	1.208	0.01912
Core matrisome	ECM Glycoproteins	EFEMP1	EGF-containing fibulin-like extracellular matrix protein 1	3218	rs7577894	2 56008904	Cardiac complications, not elsewhere classified	429.9	Amyotrophic lateral sclerosis	153	0.7472	0.01913
Core matrisome	ECM Glycoproteins	EFEMP1	EGF-containing fibulin-like extracellular matrix protein 1	3218	rs3791679	2 56096892	Fever of unknown origin	783	Height	1564	1.112	0.01927
Core matrisome	ECM Glycoproteins	EFEMP1	EGF-containing fibulin-like extracellular matrix protein 1	3218	rs3791679	2 56096892	Hodgkin's disease	201	Height	45	0.4832	0.01995
Core matrisome	ECM Glycoproteins	EFEMP1	EGF-containing fibulin-like extracellular matrix protein 1	3218	rs7577894	2 56008904	Hidradenitis	705.3	Amyotrophic lateral sclerosis	25	0.4709	0.02032
Core matrisome	ECM Glycoproteins	EFEMP1	EGF-containing fibulin-like extracellular matrix protein 1	3218	rs3791679	2 56096892	Candidiasis	112	Height	570	1.177	0.02033
Core matrisome	ECM Glycoproteins	EFEMP1	EGF-containing fibulin-like extracellular matrix protein 1	3218	rs7577894	2 56008904	Urinary incontinence	599.4	Amyotrophic lateral sclerosis	1353	1.111	0.0209
Core matrisome	ECM Glycoproteins	EFEMP1	EGF-containing fibulin-like extracellular matrix protein 1	3218	rs3791679	2 56096892	Esophageal cancer	150	Height	47	1.665	0.0217
Core matrisome	ECM Glycoproteins	EFEMP1	EGF-containing fibulin-like extracellular matrix protein 1	3218	rs7577894	2 56008904	Pneumonitis due to inhalation of food or vomitus	501	Amyotrophic lateral sclerosis	195	1.274	0.02185
Core matrisome	ECM Glycoproteins	EFEMP1	EGF-containing fibulin-like extracellular matrix protein 1	3218	rs7577894	2 56008904	Gram negative septicemia	038.1	Amyotrophic lateral sclerosis	135	1.33	0.022
Core matrisome	ECM Glycoproteins	EFEMP1	EGF-containing fibulin-like extracellular matrix protein 1	3218	rs7577894	2 56008904	Reticulosarcoma	202.22	Amyotrophic lateral sclerosis	62	0.6418	0.02255
Core matrisome	ECM Glycoproteins	EFEMP1	EGF-containing fibulin-like extracellular matrix protein 1	3218	rs3791679	2 56096892	Facial nerve disorders	352.2	Height	137	0.6968	0.02262
Core matrisome	ECM Glycoproteins	EFEMP1	EGF-containing fibulin-like extracellular matrix protein 1	3218	rs3791679	2 56096892	Neurological disorders due to brain damage	292	Height	1252	1.129	0.02273
Core matrisome	ECM Glycoproteins	EFEMP1	EGF-containing fibulin-like extracellular matrix protein 1	3218	rs7577894	2 56008904	Temporomandibular joint disorders	526.4	Amyotrophic lateral sclerosis	275	1.223	0.02298
Core matrisome	ECM Glycoproteins	EFEMP1	EGF-containing fibulin-like extracellular matrix protein 1	3218	rs3791679	2 56096892	Transient cerebral ischemia	433.31	Height	951	0.8718	0.02326
Core matrisome	ECM Glycoproteins	EFEMP1	EGF-containing fibulin-like extracellular matrix protein 1	3218	rs7577894	2 56008904	Epistaxis or throat hemorrhage	477	Amyotrophic lateral sclerosis	493	1.176	0.02348
Core matrisome	ECM Glycoproteins	EFEMP1	EGF-containing fibulin-like extracellular matrix protein 1	3218	rs3791679	2 56096892	Breast cancer	174.11	Height	681	1.164	0.02352
Core matrisome	ECM Glycoproteins	EFEMP1	EGF-containing fibulin-like extracellular matrix protein 1	3218	rs3791679	2 56096892	Cervicocranial/Cervicobrachial syndrome	767	Height	321	1.233	0.02362
Core matrisome	ECM Glycoproteins	EFEMP1	EGF-containing fibulin-like extracellular matrix protein 1	3218	rs7577894	2 56008904	Astigmatism	367.2	Amyotrophic lateral sclerosis	3799	1.11	0.02408
Core matrisome	ECM Glycoproteins	EFEMP1	EGF-containing fibulin-like extracellular matrix protein 1	3218	rs7577894	2 56008904	Psychogenic disorder	303.3	Amyotrophic lateral sclerosis	127	1.344	0.02606
Core matrisome	ECM Glycoproteins	EFEMP1	EGF-containing fibulin-like extracellular matrix protein 1	3218	rs3791679	2 56096892	Coma; stupor; and brain damage	348.1	Height	765	1.15	0.02639
Core matrisome	ECM Glycoproteins	EFEMP1	EGF-containing fibulin-like extracellular matrix protein 1	3218	rs3791679	2 56096892	Cardiac congenital anomalies	747.1	Height	197	0.7531	0.027
Core matrisome	ECM Glycoproteins	EFEMP1	EGF-containing fibulin-like extracellular matrix protein 1	3218	rs3791679	2 56096892	Bladder neck obstruction	596.1	Height	308	0.7936	0.02726
Core matrisome	ECM Glycoproteins	EFEMP1	EGF-containing fibulin-like extracellular matrix protein 1	3218	rs7577894	2 56008904	Cellulitis and abscess of leg	681.5	Amyotrophic lateral sclerosis	748	1.132	0.02752
Core matrisome	ECM Glycoproteins	EFEMP1	EGF-containing fibulin-like extracellular matrix protein 1	3218	rs7577894	2 56008904	Hodgkin's disease	201	Amyotrophic lateral sclerosis	45	0.6045	0.02813
Core matrisome	ECM Glycoproteins	EFEMP1	EGF-containing fibulin-like extracellular matrix protein 1	3218	rs7577894	2 56008904	Corns and callosities	700	Amyotrophic lateral sclerosis	859	1.126	0.02826
Core matrisome	ECM Glycoproteins	EFEMP1	EGF-containing fibulin-like extracellular matrix protein 1	3218	rs7577894	2 56008904	Colon cancer	153.2	Amyotrophic lateral sclerosis	346	1.191	0.02829
Core matrisome	ECM Glycoproteins	EFEMP1	EGF-containing fibulin-like extracellular matrix protein 1	3218	rs3791679	2 56096892	Other dyschromia	694.2	Height	310	1.226	0.02845
Core matrisome	ECM Glycoproteins	EFEMP1	EGF-containing fibulin-like extracellular matrix protein 1	3218	rs3791679	2 56096892	Urethral stricture (not specified as infectious)	597.1	Height	124	0.6943	0.02863
Core matrisome	ECM Glycoproteins	EFEMP1	EGF-containing fibulin-like extracellular matrix protein 1	3218	rs3791679	2 56096892	Jaundice	573.5	Height	109	1.388	0.02882
Core matrisome	ECM Glycoproteins	EFEMP1	EGF-containing fibulin-like extracellular matrix protein 1	3218	rs3791679	2 56096892	Diverticulosis	562.1	Height	2483	0.9015	0.02898
Core matrisome	ECM Glycoproteins	EFEMP1	EGF-containing fibulin-like extracellular matrix protein 1	3218	rs7577894	2 56008904	Psoriasis & related disorders	696	Amyotrophic lateral sclerosis	368	1.181	0.02956
Core matrisome	ECM Glycoproteins	EFEMP1	EGF-containing fibulin-like extracellular matrix protein 1	3218	rs7577894	2 56008904	Renal failure	585	Amyotrophic lateral sclerosis	2061	1.084	0.02957
Core matrisome	ECM Glycoproteins	EFEMP1	EGF-containing fibulin-like extracellular matrix protein 1	3218	rs3791679	2 56096892	Other disorders of the nervous system	349	Height	84	1.445	0.02982
Core matrisome	ECM Glycoproteins	EFEMP1	EGF-containing fibulin-like extracellular matrix protein 1	3218	rs3791679	2 56096892	Syncope and collapse	788	Height	1465	1.107	0.03062
Core matrisome	ECM Glycoproteins	EFEMP1	EGF-containing fibulin-like extracellular matrix protein 1	3218	rs3791679	2 56096892	Chronic glomerulonephritis	580.14	Height	26	1.88	0.03073
Core matrisome	ECM Glycoproteins	EFEMP1	EGF-containing fibulin-like extracellular matrix protein 1	3218	rs7577894	2 56008904	Renal colic	594.8	Amyotrophic lateral sclerosis	59	1.492	0.03128
Core matrisome	ECM Glycoproteins	EFEMP1	EGF-containing fibulin-like extracellular matrix protein 1	3218	rs7577894	2 56008904	Celiac disease	557.11	Amyotrophic lateral sclerosis	46	1.585	0.03133
Core matrisome	ECM Glycoproteins	EFEMP1	EGF-containing fibulin-like extracellular matrix protein 1	3218	rs3791679	2 56096892	Osteoarthrosis NOS	740.9	Height	4527	0.9226	0.03223
Core matrisome	ECM Glycoproteins	EFEMP1	EGF-containing fibulin-like extracellular matrix protein 1	3218	rs7577894	2 56008904	Osteoarthrosis; localized, primary	740.11	Amyotrophic lateral sclerosis	399	0.8451	0.03262
Core matrisome	ECM Glycoproteins	EFEMP1	EGF-containing fibulin-like extracellular matrix protein 1	3218	rs3791679	2 56096892	Dysmetabolic syndrome X	277.7	Height	112	0.6888	0.03272
Core matrisome	ECM Glycoproteins	EFEMP1	EGF-containing fibulin-like extracellular matrix protein 1	3218	rs7577894	2 56008904	Other abnormal blood chemistry	790.6	Amyotrophic lateral sclerosis	1853	1.091	0.03326
Core matrisome	ECM Glycoproteins	EFEMP1	EGF-containing fibulin-like extracellular matrix protein 1	3218	rs7577894	2 56008904	Tobacco use disorder	318	Amyotrophic lateral sclerosis	1902	0.9248	0.03394
Core matrisome	ECM Glycoproteins	EFEMP1	EGF-containing fibulin-like extracellular matrix protein 1	3218	rs3791679	2 56096892	Hemorrhage NOS	459.1	Height	58	0.5852	0.03396
Core matrisome	ECM Glycoproteins	EFEMP1	EGF-containing fibulin-like extracellular matrix protein 1	3218	rs7577894	2 56008904	Acute appendicitis	540.11	Amyotrophic lateral sclerosis	98	0.7265	0.03453
Core matrisome	ECM Glycoproteins	EFEMP1	EGF-containing fibulin-like extracellular matrix protein 1	3218	rs3791679	2 56096892	Cardiac shunt/ heart septal defect	747.11	Height	111	0.6926	0.03529
Core matrisome	ECM Glycoproteins	EFEMP1	EGF-containing fibulin-like extracellular matrix protein 1	3218	rs7577894	2 56008904	Cervical radiculitis	765	Amyotrophic lateral sclerosis	634	1.135	0.03572
Core matrisome	ECM Glycoproteins	EFEMP1	EGF-containing fibulin-like extracellular matrix protein 1	3218	rs7577894	2 56008904	Candidiasis	112	Amyotrophic lateral sclerosis	570	1.142	0.03612
Core matrisome	ECM Glycoproteins	EFEMP1	EGF-containing fibulin-like extracellular matrix protein 1	3218	rs3791679	2 56096892	Other specified diseases of hair and hair follicles	704.8	Height	206	0.77	0.03614
Core matrisome	ECM Glycoproteins	EFEMP1	EGF-containing fibulin-like extracellular matrix protein 1	3218	rs3791679	2 56096892	Other biliary tract disease	575	Height	285	0.8024	0.03647
Core matrisome	ECM Glycoproteins	EFEMP1	EGF-containing fibulin-like extracellular matrix protein 1	3218	rs3791679	2 56096892	Other conditions of brain, NOS	348.9	Height	83	1.428	0.03659
Core matrisome	ECM Glycoproteins	EFEMP1	EGF-containing fibulin-like extracellular matrix protein 1	3218	rs3791679	2 56096892	Osteoporosis	743.11	Height	1659	0.8955	0.03676
Core matrisome	ECM Glycoproteins	EFEMP1	EGF-containing fibulin-like extracellular matrix protein 1	3218	rs7577894	2 56008904	Acquired toe deformities	735.2	Amyotrophic lateral sclerosis	758	1.129	0.03689
Core matrisome	ECM Glycoproteins	EFEMP1	EGF-containing fibulin-like extracellular matrix protein 1	3218	rs3791679	2 56096892	Breast cancer	174	Height	705	1.148	0.03689
Core matrisome	ECM Glycoproteins	EFEMP1	EGF-containing fibulin-like extracellular matrix protein 1	3218	rs7577894	2 56008904	Cystoid macular degeneration of retina	362.23	Amyotrophic lateral sclerosis	254	1.228	0.03732
Core matrisome	ECM Glycoproteins	EFEMP1	EGF-containing fibulin-like extracellular matrix protein 1	3218	rs3791679	2 56096892	Postnasal drip	475.9	Height	47	0.5526	0.03779
Core matrisome	ECM Glycoproteins	EFEMP1	EGF-containing fibulin-like extracellular matrix protein 1	3218	rs3791679	2 56096892	Breast cancer, including in situ	174.1	Height	695	1.148	0.03812
Core matrisome	ECM Glycoproteins	EFEMP1	EGF-containing fibulin-like extracellular matrix protein 1	3218	rs3791679	2 56096892	Dislocation	830	Height	1567	1.101	0.03837
Core matrisome	ECM Glycoproteins	EFEMP1	EGF-containing fibulin-like extracellular matrix protein 1	3218	rs7577894	2 56008904	Oliguria and anuria	599.6	Amyotrophic lateral sclerosis	28	0.5378	0.03845
Core matrisome	ECM Glycoproteins	EFEMP1	EGF-containing fibulin-like extracellular matrix protein 1	3218	rs7577894	2 56008904	Fracture of upper limb	803	Amyotrophic lateral sclerosis	1015	1.108	0.03888
Core matrisome	ECM Glycoproteins	EFEMP1	EGF-containing fibulin-like extracellular matrix protein 1	3218	rs7577894	2 56008904	History of diseases of digestive system	564.9	Amyotrophic lateral sclerosis	56	0.6542	0.03955
Core matrisome	ECM Glycoproteins	EFEMP1	EGF-containing fibulin-like extracellular matrix protein 1	3218	rs7577894	2 56008904	Atrophic gastritis	535.2	Amyotrophic lateral sclerosis	103	1.344	0.03988
Core matrisome	ECM Glycoproteins	EFEMP1	EGF-containing fibulin-like extracellular matrix protein 1	3218	rs3791679	2 56096892	Substance addiction and disorders	316	Height	246	1.234	0.04034
Core matrisome	ECM Glycoproteins	EFEMP1	EGF-containing fibulin-like extracellular matrix protein 1	3218	rs3791679	2 56096892	Pathologic fracture	743.2	Height	517	0.8478	0.04035
Core matrisome	ECM Glycoproteins	EFEMP1	EGF-containing fibulin-like extracellular matrix protein 1	3218	rs3791679	2 56096892	Other congenital anomalies	759	Height	46	1.578	0.04042
Core matrisome	ECM Glycoproteins	EFEMP1	EGF-containing fibulin-like extracellular matrix protein 1	3218	rs7577894	2 56008904	Osteoarthrosis NOS	740.9	Amyotrophic lateral sclerosis	4527	0.9353	0.04063
Core matrisome	ECM Glycoproteins	EFEMP1	EGF-containing fibulin-like extracellular matrix protein 1	3218	rs3791679	2 56096892	Astigmatism	367.2	Height	3799	1.114	0.04065
Core matrisome	ECM Glycoproteins	EFEMP1	EGF-containing fibulin-like extracellular matrix protein 1	3218	rs7577894	2 56008904	Occlusion and stenosis of precerebral arteries	433.1	Amyotrophic lateral sclerosis	1163	0.9074	0.0409
Core matrisome	ECM Glycoproteins	EFEMP1	EGF-containing fibulin-like extracellular matrix protein 1	3218	rs3791679	2 56096892	Hidradenitis	705.3	Height	25	0.4089	0.04163
Core matrisome	ECM Glycoproteins	EFEMP1	EGF-containing fibulin-like extracellular matrix protein 1	3218	rs3791679	2 56096892	Osteoarthrosis	740	Height	5272	0.9314	0.04196
Core matrisome	ECM Glycoproteins	EFEMP1	EGF-containing fibulin-like extracellular matrix protein 1	3218	rs3791679	2 56096892	Cardiac and circulatory congenital anomalies	747	Height	245	0.7939	0.04204
Core matrisome	ECM Glycoproteins	EFEMP1	EGF-containing fibulin-like extracellular matrix protein 1	3218	rs3791679	2 56096892	CNS infection and poliomyelitis	324	Height	59	1.495	0.04215
Core matrisome	ECM Glycoproteins	EFEMP1	EGF-containing fibulin-like extracellular matrix protein 1	3218	rs3791679	2 56096892	Chronic ulcer of unspecified site	707.3	Height	260	0.7985	0.04216
Core matrisome	ECM Glycoproteins	EFEMP1	EGF-containing fibulin-like extracellular matrix protein 1	3218	rs7577894	2 56008904	Noninflammatory disorders of cervix	619.3	Amyotrophic lateral sclerosis	59	0.6685	0.04286
Core matrisome	ECM Glycoproteins	EFEMP1	EGF-containing fibulin-like extracellular matrix protein 1	3218	rs7577894	2 56008904	Pancytopenia	284.1	Amyotrophic lateral sclerosis	80	0.7103	0.04304
Core matrisome	ECM Glycoproteins	EFEMP1	EGF-containing fibulin-like extracellular matrix protein 1	3218	rs7577894	2 56008904	Hepatomegaly	573.3	Amyotrophic lateral sclerosis	49	1.513	0.04366
Core matrisome	ECM Glycoproteins	EFEMP1	EGF-containing fibulin-like extracellular matrix protein 1	3218	rs3791679	2 56096892	Senile dementia	290.13	Height	495	1.186	0.04428
Core matrisome	ECM Glycoproteins	EFEMP1	EGF-containing fibulin-like extracellular matrix protein 1	3218	rs7577894	2 56008904	Exophthalmos	242.3	Amyotrophic lateral sclerosis	39	1.584	0.04477
Core matrisome	ECM Glycoproteins	EFEMP1	EGF-containing fibulin-like extracellular matrix protein 1	3218	rs7577894	2 56008904	Age-related macular degeneration	362.29	Amyotrophic lateral sclerosis	749	1.147	0.04553
Core matrisome	ECM Glycoproteins	EFEMP1	EGF-containing fibulin-like extracellular matrix protein 1	3218	rs3791679	2 56096892	Elevated sedimentation rate	790.1	Height	156	1.297	0.04555
Core matrisome	ECM Glycoproteins	EFEMP1	EGF-containing fibulin-like extracellular matrix protein 1	3218	rs7577894	2 56008904	Light-headedness and vertigo	386.9	Amyotrophic lateral sclerosis	2692	1.072	0.04574
Core matrisome	ECM Glycoproteins	EFEMP1	EGF-containing fibulin-like extracellular matrix protein 1	3218	rs3791679	2 56096892	Chronic interstitial cystitis	592.13	Height	29	1.73	0.04595
Core matrisome	ECM Glycoproteins	EFEMP1	EGF-containing fibulin-like extracellular matrix protein 1	3218	rs3791679	2 56096892	Conductive hearing loss	389.2	Height	85	1.396	0.04595
Core matrisome	ECM Glycoproteins	EFEMP1	EGF-containing fibulin-like extracellular matrix protein 1	3218	rs7577894	2 56008904	Esophageal cancer	150	Amyotrophic lateral sclerosis	47	1.518	0.04602
Core matrisome	ECM Glycoproteins	EFEMP1	EGF-containing fibulin-like extracellular matrix protein 1	3218	rs7577894	2 56008904	CNS infection and poliomyelitis	324	Amyotrophic lateral sclerosis	59	1.449	0.04636
Core matrisome	ECM Glycoproteins	EFEMP1	EGF-containing fibulin-like extracellular matrix protein 1	3218	rs3791679	2 56096892	Encounter for long-term use of aspirin	457.3	Height	246	0.7885	0.04654
Core matrisome	ECM Glycoproteins	EFEMP1	EGF-containing fibulin-like extracellular matrix protein 1	3218	rs7577894	2 56008904	Noninflammatory disorders of vagina	619.4	Amyotrophic lateral sclerosis	176	1.243	0.04687
Core matrisome	ECM Glycoproteins	EFEMP1	EGF-containing fibulin-like extracellular matrix protein 1	3218	rs7577894	2 56008904	Celiac or tropical sprue	557.1	Amyotrophic lateral sclerosis	48	1.515	0.04705
Core matrisome	ECM Glycoproteins	EFEMP1	EGF-containing fibulin-like extracellular matrix protein 1	3218	rs7577894	2 56008904	Psychogenic and somatoform disorders	303	Amyotrophic lateral sclerosis	307	1.191	0.04708
Core matrisome	ECM Glycoproteins	EFEMP1	EGF-containing fibulin-like extracellular matrix protein 1	3218	rs3791679	2 56096892	Schizophrenia and other psychotic disorders	295	Height	595	1.158	0.04768
Core matrisome	ECM Glycoproteins	EFEMP1	EGF-containing fibulin-like extracellular matrix protein 1	3218	rs3791679	2 56096892	Diseases of hair and hair follicles	704	Height	413	0.8414	0.04851
Core matrisome	ECM Glycoproteins	EFEMP1	EGF-containing fibulin-like extracellular matrix protein 1	3218	rs7577894	2 56008904	Calculus of bile duct	574.2	Amyotrophic lateral sclerosis	171	0.7972	0.04858
Core matrisome	ECM Glycoproteins	EFEMP1	EGF-containing fibulin-like extracellular matrix protein 1	3218	rs3791679	2 56096892	Angiodysplasia of intestine	556.11	Height	31	0.4848	0.04867
Core matrisome	ECM Glycoproteins	EFEMP1	EGF-containing fibulin-like extracellular matrix protein 1	3218	rs3791679	2 56096892	Other disorders of the kidney and ureters	586	Height	1530	1.096	0.04956
Core matrisome	ECM Glycoproteins	EFEMP1	EGF-containing fibulin-like extracellular matrix protein 1	3218	rs7577894	2 56008904	Hemorrhage of gastrointestinal tract	578.9	Amyotrophic lateral sclerosis	682	1.124	0.0497
Core matrisome	ECM Glycoproteins	EFEMP1	EGF-containing fibulin-like extracellular matrix protein 1	3218	rs3791679	2 56096892	Hyperplasia of prostate	600	Height	2205	0.8907	0.0499
Core matrisome	ECM Glycoproteins	FBN2	fibrillin 2	3604	rs27855	5	Disturbances of sensation of smell and taste	350.6	Height	69	0.4638	2.108e-4
Core matrisome	ECM Glycoproteins	FBN2	fibrillin 2	3604	rs374748	5 127699375	progressive myopia	360.2	Extreme obesity	50	2.39	8.685e-4
Core matrisome	ECM Glycoproteins	FBN2	fibrillin 2	3604	rs374748	5 127699375	Acidosis	276.41	Extreme obesity	153	1.677	0.001153
Core matrisome	ECM Glycoproteins	FBN2	fibrillin 2	3604	rs27855	5	Cholangitis	575.1	Height	51	1.853	0.001989
Core matrisome	ECM Glycoproteins	FBN2	fibrillin 2	3604	rs27855	5	Open wound of toe(s)	871.4	Height	49	0.4822	0.002367
Core matrisome	ECM Glycoproteins	FBN2	fibrillin 2	3604	rs27855	5	Disorders of sacrum	724.1	Height	358	0.7786	0.00339
Core matrisome	ECM Glycoproteins	FBN2	fibrillin 2	3604	rs374748	5 127699375	Acid-base balance disorder	276.4	Extreme obesity	215	1.498	0.004036
Core matrisome	ECM Glycoproteins	FBN2	fibrillin 2	3604	rs374748	5 127699375	Benign neoplasm of colon	208	Extreme obesity	2841	1.165	0.004148
Core matrisome	ECM Glycoproteins	FBN2	fibrillin 2	3604	rs374748	5 127699375	Plasma protein metabolism disorder	270.3	Extreme obesity	227	1.476	0.004962
Core matrisome	ECM Glycoproteins	FBN2	fibrillin 2	3604	rs374748	5 127699375	Calculus of kidney	594.1	Extreme obesity	628	1.288	0.005216
Core matrisome	ECM Glycoproteins	FBN2	fibrillin 2	3604	rs374748	5 127699375	Other rheumatic heart disease	420.4	Extreme obesity	34	2.382	0.005626
Core matrisome	ECM Glycoproteins	FBN2	fibrillin 2	3604	rs374748	5 127699375	Colon cancer	153.2	Extreme obesity	346	1.381	0.00642
Core matrisome	ECM Glycoproteins	FBN2	fibrillin 2	3604	rs27855	5	Diseases of nail	703	Height	994	0.8672	0.006733
Core matrisome	ECM Glycoproteins	FBN2	fibrillin 2	3604	rs27855	5	Other intestinal obstruction	560.4	Height	344	0.7974	0.006812
Core matrisome	ECM Glycoproteins	FBN2	fibrillin 2	3604	rs374748	5 127699375	Iron deficiency anemia secondary to blood loss	280.2	Extreme obesity	192	1.508	0.006989
Core matrisome	ECM Glycoproteins	FBN2	fibrillin 2	3604	rs27855	5	Benign neoplasm of colon	208	Height	2841	1.093	0.007148
Core matrisome	ECM Glycoproteins	FBN2	fibrillin 2	3604	rs27855	5	stress incontinence, female	624.9	Height	642	0.842	0.007689
Core matrisome	ECM Glycoproteins	FBN2	fibrillin 2	3604	rs27855	5	Visual disturbances	368	Height	1645	1.114	0.0081
Core matrisome	ECM Glycoproteins	FBN2	fibrillin 2	3604	rs374748	5 127699375	Redundant prepuce and phimosis/BXO	604.1	Extreme obesity	70	0.2063	0.009637
Core matrisome	ECM Glycoproteins	FBN2	fibrillin 2	3604	rs27855	5	Gastrointestinal complications	569.2	Height	270	1.255	0.01003
Core matrisome	ECM Glycoproteins	FBN2	fibrillin 2	3604	rs27855	5	Other specified diseases of nail	703.8	Height	939	0.8714	0.01082
Core matrisome	ECM Glycoproteins	FBN2	fibrillin 2	3604	rs374748	5 127699375	Urinary calculus	594	Extreme obesity	828	1.228	0.01147
Core matrisome	ECM Glycoproteins	FBN2	fibrillin 2	3604	rs27855	5	Polycythemia vera, secondary	289.8	Height	69	0.6157	0.01156
Core matrisome	ECM Glycoproteins	FBN2	fibrillin 2	3604	rs27855	5	Hyperplasia of prostate	600	Height	2205	1.136	0.01241
Core matrisome	ECM Glycoproteins	FBN2	fibrillin 2	3604	rs374748	5 127699375	Colorectal cancer	153	Extreme obesity	397	1.324	0.01257
Core matrisome	ECM Glycoproteins	FBN2	fibrillin 2	3604	rs27855	5	Poisoning by water, mineral, and uric acid metabolism drugs	974	Height	63	1.571	0.01376
Core matrisome	ECM Glycoproteins	FBN2	fibrillin 2	3604	rs27855	5	Miscarriage; stillbirth	634	Height	44	0.5441	0.01377
Core matrisome	ECM Glycoproteins	FBN2	fibrillin 2	3604	rs27855	5	Renal osteodystrophy	588.1	Height	92	1.441	0.01387
Core matrisome	ECM Glycoproteins	FBN2	fibrillin 2	3604	rs27855	5	Epilepsy	345.1	Height	170	0.7519	0.01389
Core matrisome	ECM Glycoproteins	FBN2	fibrillin 2	3604	rs27855	5	Partial epilepsy	345.12	Height	128	0.7178	0.01396
Core matrisome	ECM Glycoproteins	FBN2	fibrillin 2	3604	rs27855	5	Keratoderma, acquired	701.1	Height	815	0.8702	0.01623
Core matrisome	ECM Glycoproteins	FBN2	fibrillin 2	3604	rs374748	5 127699375	Peyronie's disease	604.3	Extreme obesity	44	2.004	0.01627
Core matrisome	ECM Glycoproteins	FBN2	fibrillin 2	3604	rs374748	5 127699375	Mechanical complications of cardiac/vascular device, implant, and graft	854	Extreme obesity	340	0.7003	0.01701
Core matrisome	ECM Glycoproteins	FBN2	fibrillin 2	3604	rs27855	5	Vaginal enterocele, congenital or acquired	618.6	Height	96	0.6839	0.0171
Core matrisome	ECM Glycoproteins	FBN2	fibrillin 2	3604	rs374748	5 127699375	Protein plasma/amino-acid transport and metabolism disorder	270	Extreme obesity	278	1.358	0.01754
Core matrisome	ECM Glycoproteins	FBN2	fibrillin 2	3604	rs374748	5 127699375	Atrophy of edentulous alveolar ridge	525.2	Extreme obesity	98	0.4225	0.01805
Core matrisome	ECM Glycoproteins	FBN2	fibrillin 2	3604	rs27855	5	Coronary atherosclerosis	411.4	Height	3499	1.079	0.01968
Core matrisome	ECM Glycoproteins	FBN2	fibrillin 2	3604	rs27855	5	Other conditions of brain	348	Height	205	1.264	0.01989
Core matrisome	ECM Glycoproteins	FBN2	fibrillin 2	3604	rs27855	5	Acute posthemorrhagic anemia	285.1	Height	679	0.8699	0.02061
Core matrisome	ECM Glycoproteins	FBN2	fibrillin 2	3604	rs374748	5 127699375	Other cells and casts in urine	598.4	Extreme obesity	141	1.603	0.02108
Core matrisome	ECM Glycoproteins	FBN2	fibrillin 2	3604	rs374748	5 127699375	Elevated sedimentation rate	790.1	Extreme obesity	156	1.532	0.02116
Core matrisome	ECM Glycoproteins	FBN2	fibrillin 2	3604	rs27855	5	Cardiac shunt/ heart septal defect	747.11	Height	111	1.367	0.0214
Core matrisome	ECM Glycoproteins	FBN2	fibrillin 2	3604	rs374748	5 127699375	Other diseases of the teeth and supporting structures	525	Extreme obesity	330	0.7008	0.02159
Core matrisome	ECM Glycoproteins	FBN2	fibrillin 2	3604	rs27855	5	Rhabdomyolysis	772.4	Height	42	1.65	0.0221
Core matrisome	ECM Glycoproteins	FBN2	fibrillin 2	3604	rs374748	5 127699375	Ankylosis of joint	741.1	Extreme obesity	127	1.555	0.02221
Core matrisome	ECM Glycoproteins	FBN2	fibrillin 2	3604	rs27855	5	Abnormality of gait	350.2	Height	1304	0.9004	0.02231
Core matrisome	ECM Glycoproteins	FBN2	fibrillin 2	3604	rs374748	5 127699375	Pneumonitis due to inhalation of food or vomitus	501	Extreme obesity	195	0.6173	0.02238
Core matrisome	ECM Glycoproteins	FBN2	fibrillin 2	3604	rs27855	5	Menopausal & postmenopausal disorders	627	Height	2744	0.901	0.02242
Core matrisome	ECM Glycoproteins	FBN2	fibrillin 2	3604	rs27855	5	Hodgkin's disease	201	Height	45	1.615	0.02311
Core matrisome	ECM Glycoproteins	FBN2	fibrillin 2	3604	rs374748	5 127699375	Vascular insufficiency of intestine	441	Extreme obesity	132	1.506	0.02405
Core matrisome	ECM Glycoproteins	FBN2	fibrillin 2	3604	rs27855	5	Cardiac and circulatory congenital anomalies	747	Height	245	1.233	0.02423
Core matrisome	ECM Glycoproteins	FBN2	fibrillin 2	3604	rs27855	5	Ischemic Heart Disease	411	Height	4085	1.072	0.02493
Core matrisome	ECM Glycoproteins	FBN2	fibrillin 2	3604	rs374748	5 127699375	Sinoatrial node dysfunction	427.8	Extreme obesity	267	0.6618	0.02501
Core matrisome	ECM Glycoproteins	FBN2	fibrillin 2	3604	rs374748	5 127699375	Ovarian cyst	628	Extreme obesity	265	1.398	0.02524
Core matrisome	ECM Glycoproteins	FBN2	fibrillin 2	3604	rs27855	5	Mental retardation	315.3	Height	27	0.4904	0.02557
Core matrisome	ECM Glycoproteins	FBN2	fibrillin 2	3604	rs374748	5 127699375	Blood in stool	578.2	Extreme obesity	846	1.206	0.02702
Core matrisome	ECM Glycoproteins	FBN2	fibrillin 2	3604	rs27855	5	Epilepsy, recurrent seizures, convulsions	345	Height	512	0.8638	0.0273
Core matrisome	ECM Glycoproteins	FBN2	fibrillin 2	3604	rs374748	5 127699375	Osteoarthrosis; localized, secondary	740.12	Extreme obesity	80	1.684	0.02796
Core matrisome	ECM Glycoproteins	FBN2	fibrillin 2	3604	rs27855	5	Sarcoidosis	697	Height	69	1.461	0.02802
Core matrisome	ECM Glycoproteins	FBN2	fibrillin 2	3604	rs374748	5 127699375	Non-melanoma skin cancer	172.2	Extreme obesity	1931	0.8692	0.02809
Core matrisome	ECM Glycoproteins	FBN2	fibrillin 2	3604	rs27855	5	Type 1 diabetic neuropathy	250.14	Height	118	0.7365	0.02855
Core matrisome	ECM Glycoproteins	FBN2	fibrillin 2	3604	rs27855	5	Benign neoplasm of breast	610.4	Height	78	1.435	0.02938
Core matrisome	ECM Glycoproteins	FBN2	fibrillin 2	3604	rs374748	5 127699375	Aplastic anemia	284	Extreme obesity	172	1.431	0.02952
Core matrisome	ECM Glycoproteins	FBN2	fibrillin 2	3604	rs374748	5 127699375	Gouty arthropathy	274.11	Extreme obesity	226	1.382	0.02993
Core matrisome	ECM Glycoproteins	FBN2	fibrillin 2	3604	rs27855	5	Other hypertensive complications	401.3	Height	353	1.2	0.03055
Core matrisome	ECM Glycoproteins	FBN2	fibrillin 2	3604	rs27855	5	Corns and callosities	700	Height	859	0.887	0.03118
Core matrisome	ECM Glycoproteins	FBN2	fibrillin 2	3604	rs27855	5	Other disorders of the nervous system	349	Height	84	0.6988	0.03167
Core matrisome	ECM Glycoproteins	FBN2	fibrillin 2	3604	rs374748	5 127699375	Glaucoma	365	Extreme obesity	2586	0.8617	0.03168
Core matrisome	ECM Glycoproteins	FBN2	fibrillin 2	3604	rs27855	5	Macular puckering of retina	362.26	Height	526	1.168	0.0321
Core matrisome	ECM Glycoproteins	FBN2	fibrillin 2	3604	rs374748	5 127699375	Other abnormal glucose	250.42	Extreme obesity	1078	1.187	0.0327
Core matrisome	ECM Glycoproteins	FBN2	fibrillin 2	3604	rs374748	5 127699375	Symptoms and disorders of the joints	741	Extreme obesity	1520	1.154	0.03273
Core matrisome	ECM Glycoproteins	FBN2	fibrillin 2	3604	rs27855	5	Uterine leiomyoma	218.1	Height	407	1.175	0.03293
Core matrisome	ECM Glycoproteins	FBN2	fibrillin 2	3604	rs27855	5	Dermatophytosis of nail	110.11	Height	1447	0.9082	0.03296
Core matrisome	ECM Glycoproteins	FBN2	fibrillin 2	3604	rs374748	5 127699375	Cellulitis and abscess of face	681.2	Extreme obesity	162	0.601	0.03421
Core matrisome	ECM Glycoproteins	FBN2	fibrillin 2	3604	rs27855	5	Calcium/phosphorus disorders	275.5	Height	496	1.152	0.03426
Core matrisome	ECM Glycoproteins	FBN2	fibrillin 2	3604	rs27855	5	Benign neoplasm of uterus	218.2	Height	83	1.398	0.03438
Core matrisome	ECM Glycoproteins	FBN2	fibrillin 2	3604	rs27855	5	Cancer of other female genital organs	184	Height	106	0.7298	0.03444
Core matrisome	ECM Glycoproteins	FBN2	fibrillin 2	3604	rs27855	5	Tension headache	305.1	Height	486	0.8461	0.03447
Core matrisome	ECM Glycoproteins	FBN2	fibrillin 2	3604	rs27855	5	Disorders of esophageal motility	530.5	Height	101	1.352	0.03486
Core matrisome	ECM Glycoproteins	FBN2	fibrillin 2	3604	rs374748	5 127699375	Emphysema	496.1	Extreme obesity	283	0.7058	0.03499
Core matrisome	ECM Glycoproteins	FBN2	fibrillin 2	3604	rs27855	5	Convulsions	345.3	Height	461	0.8634	0.03517
Core matrisome	ECM Glycoproteins	FBN2	fibrillin 2	3604	rs374748	5 127699375	Polyarthropathy or polyarthritis involving multiple sites NOS	716.11	Extreme obesity	64	1.699	0.03559
Core matrisome	ECM Glycoproteins	FBN2	fibrillin 2	3604	rs27855	5	Ingrowing nail	703.1	Height	793	0.889	0.03587
Core matrisome	ECM Glycoproteins	FBN2	fibrillin 2	3604	rs374748	5 127699375	Primary open angle glaucoma	365.11	Extreme obesity	416	0.7237	0.0364
Core matrisome	ECM Glycoproteins	FBN2	fibrillin 2	3604	rs27855	5	Jaundice	573.5	Height	109	1.334	0.03659
Core matrisome	ECM Glycoproteins	FBN2	fibrillin 2	3604	rs27855	5	Cancer of mouth	145	Height	86	0.7121	0.03666
Core matrisome	ECM Glycoproteins	FBN2	fibrillin 2	3604	rs374748	5 127699375	Occlusion of cerebral arteries	433.2	Extreme obesity	565	0.7863	0.03726
Core matrisome	ECM Glycoproteins	FBN2	fibrillin 2	3604	rs374748	5 127699375	Cholelithiasis with other cholecystitis	574.12	Extreme obesity	243	0.6802	0.03773
Core matrisome	ECM Glycoproteins	FBN2	fibrillin 2	3604	rs374748	5 127699375	Other disorders of stomach and duodenum	537	Extreme obesity	270	0.705	0.03789
Core matrisome	ECM Glycoproteins	FBN2	fibrillin 2	3604	rs374748	5 127699375	H. pylori	041.8	Extreme obesity	93	0.4895	0.03847
Core matrisome	ECM Glycoproteins	FBN2	fibrillin 2	3604	rs374748	5 127699375	Other disorders of eyelids	374	Extreme obesity	1407	0.8351	0.03979
Core matrisome	ECM Glycoproteins	FBN2	fibrillin 2	3604	rs27855	5	Other specified nonpsychotic and/or transient mental disorders	291	Height	450	0.8529	0.04002
Core matrisome	ECM Glycoproteins	FBN2	fibrillin 2	3604	rs374748	5 127699375	Schizoid personality disorder	301.1	Extreme obesity	58	1.778	0.04015
Core matrisome	ECM Glycoproteins	FBN2	fibrillin 2	3604	rs27855	5	Obesity	278.1	Height	3141	1.071	0.04027
Core matrisome	ECM Glycoproteins	FBN2	fibrillin 2	3604	rs374748	5 127699375	Exostosis of jaw	526.8	Extreme obesity	32	1.98	0.04047
Core matrisome	ECM Glycoproteins	FBN2	fibrillin 2	3604	rs27855	5	Retinal hemorrhage/ischemia	362.8	Height	162	1.278	0.0405
Core matrisome	ECM Glycoproteins	FBN2	fibrillin 2	3604	rs374748	5 127699375	Obstructive chronic bronchitis	496.21	Extreme obesity	471	0.7667	0.04188
Core matrisome	ECM Glycoproteins	FBN2	fibrillin 2	3604	rs374748	5 127699375	Disorders of coccyx	724.2	Extreme obesity	219	1.381	0.042659999999999997
Core matrisome	ECM Glycoproteins	FBN2	fibrillin 2	3604	rs374748	5 127699375	Hyperglyceridemia	272.12	Extreme obesity	492	0.7509	0.04292
Core matrisome	ECM Glycoproteins	FBN2	fibrillin 2	3604	rs374748	5 127699375	Other specified disorders of plasma protein metabolism	270.38	Extreme obesity	28	2.038	0.04308
Core matrisome	ECM Glycoproteins	FBN2	fibrillin 2	3604	rs374748	5 127699375	Other abnormal blood chemistry	790.6	Extreme obesity	1853	1.145	0.04334
Core matrisome	ECM Glycoproteins	FBN2	fibrillin 2	3604	rs374748	5 127699375	Gastrointestinal hemorrhage	578	Extreme obesity	1948	1.13	0.04453
Core matrisome	ECM Glycoproteins	FBN2	fibrillin 2	3604	rs374748	5 127699375	Tinnitus	389.4	Extreme obesity	499	1.236	0.04522
Core matrisome	ECM Glycoproteins	FBN2	fibrillin 2	3604	rs374748	5 127699375	Disorders of liver	573	Extreme obesity	1706	1.134	0.04522
Core matrisome	ECM Glycoproteins	FBN2	fibrillin 2	3604	rs374748	5 127699375	Osteoarthritis; localized	740.1	Extreme obesity	1645	0.8663	0.04531
Core matrisome	ECM Glycoproteins	FBN2	fibrillin 2	3604	rs374748	5 127699375	Aseptic necrosis of bone	733.4	Extreme obesity	78	1.582	0.04539
Core matrisome	ECM Glycoproteins	FBN2	fibrillin 2	3604	rs374748	5 127699375	Disturbances of sensation of smell and taste	350.6	Extreme obesity	69	0.432	0.04594
Core matrisome	ECM Glycoproteins	FBN2	fibrillin 2	3604	rs374748	5 127699375	Disorders resulting from impaired renal function	588	Extreme obesity	238	1.336	0.04669
Core matrisome	ECM Glycoproteins	FBN2	fibrillin 2	3604	rs374748	5 127699375	Stomach cancer	151	Extreme obesity	51	0.3609	0.0468
Core matrisome	ECM Glycoproteins	FBN2	fibrillin 2	3604	rs374748	5 127699375	Uterine/Uterovaginal prolapse	618.2	Extreme obesity	262	0.7048	0.04755
Core matrisome	ECM Glycoproteins	FBN2	fibrillin 2	3604	rs374748	5 127699375	Abnormal glucose	250.4	Extreme obesity	1829	1.138	0.04788
Core matrisome	ECM Glycoproteins	FBN2	fibrillin 2	3604	rs374748	5 127699375	Unspecified polyarthropathy or polyarthritis	716.1	Extreme obesity	92	1.538	0.04875
Core matrisome	ECM Glycoproteins	FBN2	fibrillin 2	3604	rs374748	5 127699375	Cachexia	260.1	Extreme obesity	32	0.1364	0.04876
Core matrisome	ECM Glycoproteins	FBN2	fibrillin 2	3604	rs27855	5	Mental disorders due to brain damage	291.4	Height	435	0.856	0.04996
Core matrisome	ECM Glycoproteins	FGB	fibrinogen beta chain	3662	rs6056	4 155488821	Psychogenic disorder	303.3	Fibrinogen	127	1.692	3.911e-4
Core matrisome	ECM Glycoproteins	FGB	fibrinogen beta chain	3662	rs6056	4 155488821	Congenital anomalies of peripheral vascular system	747.2	Fibrinogen	44	2.253	4.474e-4
Core matrisome	ECM Glycoproteins	FGB	fibrinogen beta chain	3662	rs6056	4 155488821	Gastrointestinal malfunction arising from mental factors	303.31	Fibrinogen	31	2.316	0.002239
Core matrisome	ECM Glycoproteins	FGB	fibrinogen beta chain	3662	rs6056	4 155488821	Cerebral aneurysm	433.5	Fibrinogen	60	1.845	0.002337
Core matrisome	ECM Glycoproteins	FGB	fibrinogen beta chain	3662	rs6056	4 155488821	Urinary obstruction	599.1	Fibrinogen	149	0.578	0.003534
Core matrisome	ECM Glycoproteins	FGB	fibrinogen beta chain	3662	rs6056	4 155488821	Methicillin resistant Staphylococcus aureus	041.12	Fibrinogen	40	2.036	0.003877
Core matrisome	ECM Glycoproteins	FGB	fibrinogen beta chain	3662	rs6056	4 155488821	Nausea and vomiting	789	Fibrinogen	1851	0.8758	0.006315
Core matrisome	ECM Glycoproteins	FGB	fibrinogen beta chain	3662	rs6056	4 155488821	Blood in stool	578.2	Fibrinogen	846	1.196	0.00666
Core matrisome	ECM Glycoproteins	FGB	fibrinogen beta chain	3662	rs6056	4 155488821	Abnormality of red blood cells	289.9	Fibrinogen	33	0.2521	0.007874
Core matrisome	ECM Glycoproteins	FGB	fibrinogen beta chain	3662	rs6056	4 155488821	Benign neoplasm of eye	224	Fibrinogen	332	1.287	0.007971
Core matrisome	ECM Glycoproteins	FGB	fibrinogen beta chain	3662	rs6056	4 155488821	Hypocalcemia	275.51	Fibrinogen	117	0.5885	0.008216
Core matrisome	ECM Glycoproteins	FGB	fibrinogen beta chain	3662	rs6056	4 155488821	Anterior pituitary disorders	253.4	Fibrinogen	60	1.744	0.008256
Core matrisome	ECM Glycoproteins	FGB	fibrinogen beta chain	3662	rs6056	4 155488821	Benign neoplasm of colon	208	Fibrinogen	2841	1.113	0.008765
Core matrisome	ECM Glycoproteins	FGB	fibrinogen beta chain	3662	rs6056	4 155488821	Hemangioma and lymphangioma, any site	228	Fibrinogen	238	1.323	0.01162
Core matrisome	ECM Glycoproteins	FGB	fibrinogen beta chain	3662	rs6056	4 155488821	Spondylolisthesis, congenital	754.2	Fibrinogen	79	1.58	0.01221
Core matrisome	ECM Glycoproteins	FGB	fibrinogen beta chain	3662	rs6056	4 155488821	Disorders of optic nerve and visual pathways	377	Fibrinogen	332	1.298	0.01254
Core matrisome	ECM Glycoproteins	FGB	fibrinogen beta chain	3662	rs6056	4 155488821	Pyogenic arthritis	711.1	Fibrinogen	59	1.674	0.01322
Core matrisome	ECM Glycoproteins	FGB	fibrinogen beta chain	3662	rs6056	4 155488821	Traumatic arthropathy	836	Fibrinogen	63	0.4847	0.01456
Core matrisome	ECM Glycoproteins	FGB	fibrinogen beta chain	3662	rs6056	4 155488821	Impaction of intestine	560.2	Fibrinogen	27	0.2326	0.01526
Core matrisome	ECM Glycoproteins	FGB	fibrinogen beta chain	3662	rs6056	4 155488821	First degree AV block	426.21	Fibrinogen	476	1.261	0.01801
Core matrisome	ECM Glycoproteins	FGB	fibrinogen beta chain	3662	rs6056	4 155488821	Abnormal function study of cardiovascular system	429.2	Fibrinogen	708	0.832	0.01819
Core matrisome	ECM Glycoproteins	FGB	fibrinogen beta chain	3662	rs6056	4 155488821	Psychogenic and somatoform disorders	303	Fibrinogen	307	1.279	0.01821
Core matrisome	ECM Glycoproteins	FGB	fibrinogen beta chain	3662	rs6056	4 155488821	Acute posthemorrhagic anemia	285.1	Fibrinogen	679	1.185	0.01843
Core matrisome	ECM Glycoproteins	FGB	fibrinogen beta chain	3662	rs6056	4 155488821	Mechanical complication of nervous system device, implant, and graft	855	Fibrinogen	33	1.908	0.01883
Core matrisome	ECM Glycoproteins	FGB	fibrinogen beta chain	3662	rs6056	4 155488821	Benign neoplasm of breast	610.4	Fibrinogen	78	0.5508	0.01894
Core matrisome	ECM Glycoproteins	FGB	fibrinogen beta chain	3662	rs6056	4 155488821	Pneumoconiosis	500.2	Fibrinogen	38	0.3892	0.02034
Core matrisome	ECM Glycoproteins	FGB	fibrinogen beta chain	3662	rs6056	4 155488821	Disorders of the pituitary gland and its hypothalamic control	253	Fibrinogen	158	1.365	0.02152
Core matrisome	ECM Glycoproteins	FGB	fibrinogen beta chain	3662	rs6056	4 155488821	Other diseases of respiratory system	519.8	Fibrinogen	151	1.372	0.02195
Core matrisome	ECM Glycoproteins	FGB	fibrinogen beta chain	3662	rs6056	4 155488821	Urticaria	947	Fibrinogen	361	1.251	0.02247
Core matrisome	ECM Glycoproteins	FGB	fibrinogen beta chain	3662	rs6056	4 155488821	Nephritis & nephropathy	580.32	Fibrinogen	65	1.589	0.02265
Core matrisome	ECM Glycoproteins	FGB	fibrinogen beta chain	3662	rs6056	4 155488821	Other dyschromia	694.2	Fibrinogen	310	1.256	0.02295
Core matrisome	ECM Glycoproteins	FGB	fibrinogen beta chain	3662	rs6056	4 155488821	Neutropenia	288.11	Fibrinogen	366	0.7901	0.02312
Core matrisome	ECM Glycoproteins	FGB	fibrinogen beta chain	3662	rs6056	4 155488821	Fracture of humerus	803.1	Fibrinogen	331	0.7758	0.02376
Core matrisome	ECM Glycoproteins	FGB	fibrinogen beta chain	3662	rs6056	4 155488821	Other symptoms involving abdomen and pelvis	579	Fibrinogen	1042	1.146	0.02493
Core matrisome	ECM Glycoproteins	FGB	fibrinogen beta chain	3662	rs6056	4 155488821	Ileostomy status	559	Fibrinogen	69	1.567	0.02549
Core matrisome	ECM Glycoproteins	FGB	fibrinogen beta chain	3662	rs6056	4 155488821	Congenital musculoskeletal deformities of spine	754	Fibrinogen	126	1.395	0.02594
Core matrisome	ECM Glycoproteins	FGB	fibrinogen beta chain	3662	rs6056	4 155488821	Cardiac and circulatory congenital anomalies	747	Fibrinogen	245	1.275	0.02752
Core matrisome	ECM Glycoproteins	FGB	fibrinogen beta chain	3662	rs6056	4 155488821	Abnormal loss of weight and underweight	260.5	Fibrinogen	266	1.268	0.02862
Core matrisome	ECM Glycoproteins	FGB	fibrinogen beta chain	3662	rs6056	4 155488821	Pelvic inflammatory disease	614.3	Fibrinogen	36	1.802	0.0291
Core matrisome	ECM Glycoproteins	FGB	fibrinogen beta chain	3662	rs6056	4 155488821	Dermatophytosis of nail	110.11	Fibrinogen	1447	1.128	0.02928
Core matrisome	ECM Glycoproteins	FGB	fibrinogen beta chain	3662	rs6056	4 155488821	Known or suspected fetal abnormality	655	Fibrinogen	69	1.602	0.02942
Core matrisome	ECM Glycoproteins	FGB	fibrinogen beta chain	3662	rs6056	4 155488821	pulmonary heart disease	415	Fibrinogen	772	0.8573	0.031
Core matrisome	ECM Glycoproteins	FGB	fibrinogen beta chain	3662	rs6056	4 155488821	Thyroid cancer	193	Fibrinogen	94	1.44	0.03309
Core matrisome	ECM Glycoproteins	FGB	fibrinogen beta chain	3662	rs6056	4 155488821	Jaundice	573.5	Fibrinogen	109	0.6495	0.03385
Core matrisome	ECM Glycoproteins	FGB	fibrinogen beta chain	3662	rs6056	4 155488821	Asthma	495	Fibrinogen	1390	1.119	0.0346
Core matrisome	ECM Glycoproteins	FGB	fibrinogen beta chain	3662	rs6056	4 155488821	Other dermatoses	702	Fibrinogen	4203	1.092	0.03489
Core matrisome	ECM Glycoproteins	FGB	fibrinogen beta chain	3662	rs6056	4 155488821	Bullous dermatoses	695.2	Fibrinogen	41	1.7	0.03548
Core matrisome	ECM Glycoproteins	FGB	fibrinogen beta chain	3662	rs6056	4 155488821	Peripheral or central vertigo	386.2	Fibrinogen	481	0.8234	0.03551
Core matrisome	ECM Glycoproteins	FGB	fibrinogen beta chain	3662	rs6056	4 155488821	Gouty arthropathy	274.11	Fibrinogen	226	0.757	0.03582
Core matrisome	ECM Glycoproteins	FGB	fibrinogen beta chain	3662	rs6056	4 155488821	Congenital anomalies of face and neck	749	Fibrinogen	26	1.914	0.0367
Core matrisome	ECM Glycoproteins	FGB	fibrinogen beta chain	3662	rs6056	4 155488821	Venous embolism & thrombosis	452	Fibrinogen	919	0.8621	0.03704
Core matrisome	ECM Glycoproteins	FGB	fibrinogen beta chain	3662	rs6056	4 155488821	Ankylosis of joint	741.1	Fibrinogen	127	0.6731	0.03756
Core matrisome	ECM Glycoproteins	FGB	fibrinogen beta chain	3662	rs6056	4 155488821	Cystoid macular degeneration of retina	362.23	Fibrinogen	254	1.277	0.03866
Core matrisome	ECM Glycoproteins	FGB	fibrinogen beta chain	3662	rs6056	4 155488821	Fracture of upper limb	803	Fibrinogen	1015	0.8747	0.04014
Core matrisome	ECM Glycoproteins	FGB	fibrinogen beta chain	3662	rs6056	4 155488821	Heart transplant/surgery	429.1	Fibrinogen	118	1.377	0.04014
Core matrisome	ECM Glycoproteins	FGB	fibrinogen beta chain	3662	rs6056	4 155488821	Decreased white blood cell count	288.1	Fibrinogen	398	0.8176	0.04112
Core matrisome	ECM Glycoproteins	FGB	fibrinogen beta chain	3662	rs6056	4 155488821	Chronic pain syndrome	355.1	Fibrinogen	61	1.52	0.04285
Core matrisome	ECM Glycoproteins	FGB	fibrinogen beta chain	3662	rs6056	4 155488821	Noninfectious dermatoses of eyelid	371.33	Fibrinogen	60	1.548	0.04563
Core matrisome	ECM Glycoproteins	FGB	fibrinogen beta chain	3662	rs6056	4 155488821	Gastrointestinal hemorrhage	578	Fibrinogen	1948	1.099	0.04571
Core matrisome	ECM Glycoproteins	FGB	fibrinogen beta chain	3662	rs6056	4 155488821	Deep vein thrombosis	452.2	Fibrinogen	302	0.7909	0.04657
Core matrisome	ECM Glycoproteins	FGB	fibrinogen beta chain	3662	rs6056	4 155488821	Disorders of lacrimal system	375	Fibrinogen	1752	1.12	0.04716
Core matrisome	ECM Glycoproteins	FGB	fibrinogen beta chain	3662	rs6056	4 155488821	Renal failure NOS	585.2	Fibrinogen	194	1.279	0.04769
Core matrisome	ECM Glycoproteins	FGB	fibrinogen beta chain	3662	rs6056	4 155488821	Urethral hypermobility/ISD	597.8	Fibrinogen	69	0.5963	0.04848
Core matrisome	ECM Glycoproteins	FGB	fibrinogen beta chain	3662	rs6056	4 155488821	Open wound of foot except toe(s) alone	871.3	Fibrinogen	92	1.413	0.04934
Core matrisome	ECM Glycoproteins	FRAS1	Fraser syndrome 1	19185	rs1268789	4 79280693	Colles' fracture	803.21	Hair morphology	157	0.6484	0.001345
Core matrisome	ECM Glycoproteins	FRAS1	Fraser syndrome 1	19185	rs1268789	4 79280693	Hammer toe	735.21	Hair morphology	563	0.7969	0.001482
Core matrisome	ECM Glycoproteins	FRAS1	Fraser syndrome 1	19185	rs1268789	4 79280693	Benign neoplasm of ovary	220	Hair morphology	80	1.65	0.001721
Core matrisome	ECM Glycoproteins	FRAS1	Fraser syndrome 1	19185	rs1268789	4 79280693	Localized superficial swelling, mass, or lump	687.2	Hair morphology	306	0.7591	0.003388
Core matrisome	ECM Glycoproteins	FRAS1	Fraser syndrome 1	19185	rs1268789	4 79280693	Urethral hypermobility/ISD	597.8	Hair morphology	69	0.5464	0.003938
Core matrisome	ECM Glycoproteins	FRAS1	Fraser syndrome 1	19185	rs1268789	4 79280693	Polycythemia vera, secondary	289.8	Hair morphology	69	1.627	0.00486
Core matrisome	ECM Glycoproteins	FRAS1	Fraser syndrome 1	19185	rs1268789	4 79280693	Osteoarthrosis of multiple sites	740.3	Hair morphology	689	1.225	0.005876
Core matrisome	ECM Glycoproteins	FRAS1	Fraser syndrome 1	19185	rs1268789	4 79280693	Cancer of the digestive organs and peritoneum	159	Hair morphology	102	1.468	0.006735
Core matrisome	ECM Glycoproteins	FRAS1	Fraser syndrome 1	19185	rs1268789	4 79280693	Acute, but ill-defined cerebrovascular disease	433.6	Hair morphology	579	1.195	0.007405
Core matrisome	ECM Glycoproteins	FRAS1	Fraser syndrome 1	19185	rs1268789	4 79280693	Breast conditions, congenital or relating to hormones	612	Hair morphology	208	0.7455	0.01048
Core matrisome	ECM Glycoproteins	FRAS1	Fraser syndrome 1	19185	rs1268789	4 79280693	Dyspareunia	625.1	Hair morphology	71	1.545	0.01214
Core matrisome	ECM Glycoproteins	FRAS1	Fraser syndrome 1	19185	rs1268789	4 79280693	Hypotension NOS	458.9	Hair morphology	605	1.171	0.01226
Core matrisome	ECM Glycoproteins	FRAS1	Fraser syndrome 1	19185	rs1268789	4 79280693	Acquired foot deformities	735	Hair morphology	1618	0.8947	0.0125
Core matrisome	ECM Glycoproteins	FRAS1	Fraser syndrome 1	19185	rs1268789	4 79280693	Cerebral ischemia	433.3	Hair morphology	1005	1.135	0.01351
Core matrisome	ECM Glycoproteins	FRAS1	Fraser syndrome 1	19185	rs1268789	4 79280693	Anomalies of pupillary function	379.4	Hair morphology	40	0.4974	0.01356
Core matrisome	ECM Glycoproteins	FRAS1	Fraser syndrome 1	19185	rs1268789	4 79280693	Other disorders of circulatory system	459	Hair morphology	979	1.132	0.01482
Core matrisome	ECM Glycoproteins	FRAS1	Fraser syndrome 1	19185	rs1268789	4 79280693	Iatrogenic hypotension	458.2	Hair morphology	73	1.5	0.01575
Core matrisome	ECM Glycoproteins	FRAS1	Fraser syndrome 1	19185	rs1268789	4 79280693	Complications of transplants and reattached limbs	851	Hair morphology	70	1.51	0.01687
Core matrisome	ECM Glycoproteins	FRAS1	Fraser syndrome 1	19185	rs1268789	4 79280693	Hypotension	458	Hair morphology	1167	1.119	0.01785
Core matrisome	ECM Glycoproteins	FRAS1	Fraser syndrome 1	19185	rs1268789	4 79280693	Graves' disease	242.1	Hair morphology	102	1.401	0.01785
Core matrisome	ECM Glycoproteins	FRAS1	Fraser syndrome 1	19185	rs1268789	4 79280693	Hereditary hemolytic anemias	282	Hair morphology	59	0.5961	0.0187
Core matrisome	ECM Glycoproteins	FRAS1	Fraser syndrome 1	19185	rs1268789	4 79280693	Circulatory disease NEC	459.9	Hair morphology	770	1.142	0.019
Core matrisome	ECM Glycoproteins	FRAS1	Fraser syndrome 1	19185	rs1268789	4 79280693	Chronic tonsillitis and adenoiditis	474.2	Hair morphology	57	0.5825	0.01988
Core matrisome	ECM Glycoproteins	FRAS1	Fraser syndrome 1	19185	rs1268789	4 79280693	Cirrhosis of liver without mention of alcohol	571.51	Hair morphology	120	1.361	0.02075
Core matrisome	ECM Glycoproteins	FRAS1	Fraser syndrome 1	19185	rs1268789	4 79280693	Early or threatened labor; hemorrhage in early pregnancy	636	Hair morphology	68	1.529	0.02144
Core matrisome	ECM Glycoproteins	FRAS1	Fraser syndrome 1	19185	rs1268789	4 79280693	Rheumatoid arthritis & related inflammatory polyarthropathies	714	Hair morphology	511	0.8508	0.02208
Core matrisome	ECM Glycoproteins	FRAS1	Fraser syndrome 1	19185	rs1268789	4 79280693	Hypermetropia	367.8	Hair morphology	2420	0.8927	0.02328
Core matrisome	ECM Glycoproteins	FRAS1	Fraser syndrome 1	19185	rs1268789	4 79280693	Abdominal pain	785	Hair morphology	5062	1.071	0.02332
Core matrisome	ECM Glycoproteins	FRAS1	Fraser syndrome 1	19185	rs1268789	4 79280693	Allergic rhinitis	476	Hair morphology	1716	1.1	0.02374
Core matrisome	ECM Glycoproteins	FRAS1	Fraser syndrome 1	19185	rs1268789	4 79280693	Visual field defects	368.4	Hair morphology	282	1.223	0.02449
Core matrisome	ECM Glycoproteins	FRAS1	Fraser syndrome 1	19185	rs1268789	4 79280693	Acquired toe deformities	735.2	Hair morphology	758	0.8719	0.02548
Core matrisome	ECM Glycoproteins	FRAS1	Fraser syndrome 1	19185	rs1268789	4 79280693	Transient cerebral ischemia	433.31	Hair morphology	951	1.124	0.02569
Core matrisome	ECM Glycoproteins	FRAS1	Fraser syndrome 1	19185	rs1268789	4 79280693	Infections involving bone	710	Hair morphology	293	0.8143	0.02615
Core matrisome	ECM Glycoproteins	FRAS1	Fraser syndrome 1	19185	rs1268789	4 79280693	Chronic sinusitis	475	Hair morphology	1978	1.102	0.02714
Core matrisome	ECM Glycoproteins	FRAS1	Fraser syndrome 1	19185	rs1268789	4 79280693	Polyarthropathy or polyarthritis involving multiple sites NOS	716.11	Hair morphology	64	0.6364	0.02873
Core matrisome	ECM Glycoproteins	FRAS1	Fraser syndrome 1	19185	rs1268789	4 79280693	Polycystic ovaries	256.4	Hair morphology	33	0.5198	0.02882
Core matrisome	ECM Glycoproteins	FRAS1	Fraser syndrome 1	19185	rs1268789	4 79280693	CNS infection and poliomyelitis	324	Hair morphology	59	1.5	0.02983
Core matrisome	ECM Glycoproteins	FRAS1	Fraser syndrome 1	19185	rs1268789	4 79280693	Giant cell arteritis	446.5	Hair morphology	91	0.6918	0.02993
Core matrisome	ECM Glycoproteins	FRAS1	Fraser syndrome 1	19185	rs1268789	4 79280693	Spermatocele	603.2	Hair morphology	68	1.519	0.03135
Core matrisome	ECM Glycoproteins	FRAS1	Fraser syndrome 1	19185	rs1268789	4 79280693	Sacroiliitis NEC	715.1	Hair morphology	47	0.5902	0.03208
Core matrisome	ECM Glycoproteins	FRAS1	Fraser syndrome 1	19185	rs1268789	4 79280693	Nontoxic multinodular goiter	241.2	Hair morphology	307	0.8228	0.03223
Core matrisome	ECM Glycoproteins	FRAS1	Fraser syndrome 1	19185	rs1268789	4 79280693	Hyperplasia of prostate	600	Hair morphology	2205	1.122	0.03251
Core matrisome	ECM Glycoproteins	FRAS1	Fraser syndrome 1	19185	rs1268789	4 79280693	Anaphylactic shock NOS	946	Hair morphology	99	0.6993	0.03264
Core matrisome	ECM Glycoproteins	FRAS1	Fraser syndrome 1	19185	rs1268789	4 79280693	Chronic lymphoid leukemia	204.12	Hair morphology	79	1.411	0.03292
Core matrisome	ECM Glycoproteins	FRAS1	Fraser syndrome 1	19185	rs1268789	4 79280693	Pityriasis	696.3	Hair morphology	26	1.816	0.03453
Core matrisome	ECM Glycoproteins	FRAS1	Fraser syndrome 1	19185	rs1268789	4 79280693	Inflammatory spondylopathies	715	Hair morphology	90	0.6974	0.03497
Core matrisome	ECM Glycoproteins	FRAS1	Fraser syndrome 1	19185	rs1268789	4 79280693	Chronic cystitis	592.12	Hair morphology	95	1.374	0.03516
Core matrisome	ECM Glycoproteins	FRAS1	Fraser syndrome 1	19185	rs1268789	4 79280693	Tobacco use disorder	318	Hair morphology	1902	0.922	0.03518
Core matrisome	ECM Glycoproteins	FRAS1	Fraser syndrome 1	19185	rs1268789	4 79280693	Diseases of lips	528.5	Hair morphology	100	0.7105	0.03554
Core matrisome	ECM Glycoproteins	FRAS1	Fraser syndrome 1	19185	rs1268789	4 79280693	Ulcerative colitis	555.2	Hair morphology	110	1.332	0.03718
Core matrisome	ECM Glycoproteins	FRAS1	Fraser syndrome 1	19185	rs1268789	4 79280693	Abnormal findings on exam of gastrointestinal tract/abdominal area	564.8	Hair morphology	188	0.7817	0.03724
Core matrisome	ECM Glycoproteins	FRAS1	Fraser syndrome 1	19185	rs1268789	4 79280693	Persistent mental disorders due to other conditions	290.3	Hair morphology	943	1.123	0.0383
Core matrisome	ECM Glycoproteins	FRAS1	Fraser syndrome 1	19185	rs1268789	4 79280693	Osteochondropathies	732	Hair morphology	38	1.614	0.03843
Core matrisome	ECM Glycoproteins	FRAS1	Fraser syndrome 1	19185	rs1268789	4 79280693	Open wound of nose and sinus	870.4	Hair morphology	31	0.5251	0.03911
Core matrisome	ECM Glycoproteins	FRAS1	Fraser syndrome 1	19185	rs1268789	4 79280693	Seborheic dermatitis	690	Hair morphology	612	0.8719	0.04032
Core matrisome	ECM Glycoproteins	FRAS1	Fraser syndrome 1	19185	rs1268789	4 79280693	Hemiplegia	342	Hair morphology	192	1.247	0.04126
Core matrisome	ECM Glycoproteins	FRAS1	Fraser syndrome 1	19185	rs1268789	4 79280693	Keratoderma, acquired	701.1	Hair morphology	815	0.8866	0.04207
Core matrisome	ECM Glycoproteins	FRAS1	Fraser syndrome 1	19185	rs1268789	4 79280693	Other endocrine disorders	259	Hair morphology	80	1.387	0.0425
Core matrisome	ECM Glycoproteins	FRAS1	Fraser syndrome 1	19185	rs1268789	4 79280693	Disorders of choroid	363	Hair morphology	264	0.8102	0.04309
Core matrisome	ECM Glycoproteins	FRAS1	Fraser syndrome 1	19185	rs1268789	4 79280693	Acute cystitis	592.11	Hair morphology	156	1.284	0.04409
Core matrisome	ECM Glycoproteins	FRAS1	Fraser syndrome 1	19185	rs1268789	4 79280693	Cervicitis and endocervicitis	614.51	Hair morphology	72	1.41	0.0445
Core matrisome	ECM Glycoproteins	FRAS1	Fraser syndrome 1	19185	rs1268789	4 79280693	Hallux valgus (Bunion)	735.3	Hair morphology	667	0.8762	0.04542
Core matrisome	ECM Glycoproteins	FRAS1	Fraser syndrome 1	19185	rs1268789	4 79280693	Oliguria and anuria	599.6	Hair morphology	28	0.5098	0.04604
Core matrisome	ECM Glycoproteins	FRAS1	Fraser syndrome 1	19185	rs1268789	4 79280693	Poisoning by anticonvulsants and anti-Parkinsonism drugs	966	Hair morphology	43	0.601	0.04659
Core matrisome	ECM Glycoproteins	FRAS1	Fraser syndrome 1	19185	rs1268789	4 79280693	Cancer within the respiratory system	165	Hair morphology	346	0.846	0.04669
Core matrisome	ECM Glycoproteins	FRAS1	Fraser syndrome 1	19185	rs1268789	4 79280693	Benign neoplasm of other parts of digestive system	211	Hair morphology	204	1.227	0.04773
Core matrisome	ECM Glycoproteins	FRAS1	Fraser syndrome 1	19185	rs1268789	4 79280693	Poisoning by other anti-infectives	961	Hair morphology	425	0.8488	0.04789
Core matrisome	ECM Glycoproteins	FRAS1	Fraser syndrome 1	19185	rs1268789	4 79280693	Gram negative septicemia	038.1	Hair morphology	135	1.281	0.04882
Core matrisome	ECM Glycoproteins	FRAS1	Fraser syndrome 1	19185	rs1268789	4 79280693	Hypertrophy of breast (Gynecomastia)	612.2	Hair morphology	170	0.7837	0.04908
Core matrisome	ECM Glycoproteins	FRAS1	Fraser syndrome 1	19185	rs1268789	4 79280693	Other disorders of biliary tract	575.8	Hair morphology	91	1.348	0.04912
Core matrisome	ECM Glycoproteins	IBSP	integrin-binding sialoprotein	5341	rs1054627	4	Chronic venous hypertension	453	Bone mineral density (femoral neck)	31	2.4	8.635e-4
Core matrisome	ECM Glycoproteins	IBSP	integrin-binding sialoprotein	5341	rs1054627	4	Secondary malignancy of bone	198.6	Bone mineral density (femoral neck)	186	1.408	0.001526
Core matrisome	ECM Glycoproteins	IBSP	integrin-binding sialoprotein	5341	rs1054627	4	Other specified diseases of hair and hair follicles	704.8	Bone mineral density (femoral neck)	206	0.7141	0.003266
Core matrisome	ECM Glycoproteins	IBSP	integrin-binding sialoprotein	5341	rs1054627	4	Meniere's disease	386.1	Bone mineral density (femoral neck)	65	0.5388	0.004725
Core matrisome	ECM Glycoproteins	IBSP	integrin-binding sialoprotein	5341	rs1054627	4	Cellulitis and abscess of face	681.2	Bone mineral density (femoral neck)	162	1.368	0.006895
Core matrisome	ECM Glycoproteins	IBSP	integrin-binding sialoprotein	5341	rs1054627	4	Heart failure NOS	428.2	Bone mineral density (femoral neck)	268	1.291	0.007825
Core matrisome	ECM Glycoproteins	IBSP	integrin-binding sialoprotein	5341	rs1054627	4	Epiphora	375.2	Bone mineral density (femoral neck)	166	0.7092	0.00984
Core matrisome	ECM Glycoproteins	IBSP	integrin-binding sialoprotein	5341	rs1054627	4	Secondary malignant neoplasm of liver	198.4	Bone mineral density (femoral neck)	154	1.352	0.01101
Core matrisome	ECM Glycoproteins	IBSP	integrin-binding sialoprotein	5341	rs1054627	4	Other disorders of lipoid metabolism and hyperalimentation	277.5	Bone mineral density (femoral neck)	263	0.7786	0.01192
Core matrisome	ECM Glycoproteins	IBSP	integrin-binding sialoprotein	5341	rs1054627	4	Chronic ulcer of unspecified site	707.3	Bone mineral density (femoral neck)	260	0.7828	0.01403
Core matrisome	ECM Glycoproteins	IBSP	integrin-binding sialoprotein	5341	rs1054627	4	Hematuria	593	Bone mineral density (femoral neck)	1939	0.9008	0.01446
Core matrisome	ECM Glycoproteins	IBSP	integrin-binding sialoprotein	5341	rs1054627	4	Other congenital anomalies	759	Bone mineral density (femoral neck)	46	1.664	0.01479
Core matrisome	ECM Glycoproteins	IBSP	integrin-binding sialoprotein	5341	rs1054627	4	Dysuria	599.3	Bone mineral density (femoral neck)	914	0.8695	0.01641
Core matrisome	ECM Glycoproteins	IBSP	integrin-binding sialoprotein	5341	rs1054627	4	Cancer of bone & connective tissue	170	Bone mineral density (femoral neck)	105	1.406	0.01686
Core matrisome	ECM Glycoproteins	IBSP	integrin-binding sialoprotein	5341	rs1054627	4	Paraproteinemia	270.32	Bone mineral density (femoral neck)	152	0.7299	0.01726
Core matrisome	ECM Glycoproteins	IBSP	integrin-binding sialoprotein	5341	rs1054627	4	Constipation	563	Bone mineral density (femoral neck)	1449	0.887	0.01734
Core matrisome	ECM Glycoproteins	IBSP	integrin-binding sialoprotein	5341	rs1054627	4	Other intestinal obstruction	560.4	Bone mineral density (femoral neck)	344	0.8093	0.01829
Core matrisome	ECM Glycoproteins	IBSP	integrin-binding sialoprotein	5341	rs1054627	4	Hemorrhage NOS	459.1	Bone mineral density (femoral neck)	58	0.5858	0.01851
Core matrisome	ECM Glycoproteins	IBSP	integrin-binding sialoprotein	5341	rs1054627	4	Intestinal obstruction without mention of hernia	560	Bone mineral density (femoral neck)	593	0.8495	0.01874
Core matrisome	ECM Glycoproteins	IBSP	integrin-binding sialoprotein	5341	rs1054627	4	Cardiac pacemaker/device in situ	426.9	Bone mineral density (femoral neck)	576	1.186	0.01954
Core matrisome	ECM Glycoproteins	IBSP	integrin-binding sialoprotein	5341	rs1054627	4	Colostomy and enterostomy complication	853	Bone mineral density (femoral neck)	45	0.546	0.01978
Core matrisome	ECM Glycoproteins	IBSP	integrin-binding sialoprotein	5341	rs1054627	4	Pruritus and related conditions	698	Bone mineral density (femoral neck)	502	0.8469	0.0204
Core matrisome	ECM Glycoproteins	IBSP	integrin-binding sialoprotein	5341	rs1054627	4	Reticulosarcoma	202.22	Bone mineral density (femoral neck)	62	1.53	0.02061
Core matrisome	ECM Glycoproteins	IBSP	integrin-binding sialoprotein	5341	rs1054627	4	Dermatomyositis and Polymyositis	709.4	Bone mineral density (femoral neck)	29	0.4499	0.02142
Core matrisome	ECM Glycoproteins	IBSP	integrin-binding sialoprotein	5341	rs1054627	4	Acute reaction to stress	300.8	Bone mineral density (femoral neck)	339	0.8108	0.02176
Core matrisome	ECM Glycoproteins	IBSP	integrin-binding sialoprotein	5341	rs1054627	4	Iron metabolism disorder	275.1	Bone mineral density (femoral neck)	40	1.678	0.02209
Core matrisome	ECM Glycoproteins	IBSP	integrin-binding sialoprotein	5341	rs1054627	4	Transient alteration of awareness	292.5	Bone mineral density (femoral neck)	119	0.7031	0.02249
Core matrisome	ECM Glycoproteins	IBSP	integrin-binding sialoprotein	5341	rs1054627	4	Hirsutism	704.2	Bone mineral density (femoral neck)	62	1.525	0.02252
Core matrisome	ECM Glycoproteins	IBSP	integrin-binding sialoprotein	5341	rs1054627	4	Retinal hemorrhage/ischemia	362.8	Bone mineral density (femoral neck)	162	0.742	0.02287
Core matrisome	ECM Glycoproteins	IBSP	integrin-binding sialoprotein	5341	rs1054627	4	Abnormal results of function studies	794	Bone mineral density (femoral neck)	69	0.6314	0.02458
Core matrisome	ECM Glycoproteins	IBSP	integrin-binding sialoprotein	5341	rs1054627	4	Chronic cystitis	592.12	Bone mineral density (femoral neck)	95	0.682	0.02465
Core matrisome	ECM Glycoproteins	IBSP	integrin-binding sialoprotein	5341	rs1054627	4	GERD	530.11	Bone mineral density (femoral neck)	3082	0.926	0.02515
Core matrisome	ECM Glycoproteins	IBSP	integrin-binding sialoprotein	5341	rs1054627	4	Urethral hypermobility/ISD	597.8	Bone mineral density (femoral neck)	69	1.476	0.0255
Core matrisome	ECM Glycoproteins	IBSP	integrin-binding sialoprotein	5341	rs1054627	4	Temporomandibular joint disorder NOS	526.41	Bone mineral density (femoral neck)	69	0.6363	0.02551
Core matrisome	ECM Glycoproteins	IBSP	integrin-binding sialoprotein	5341	rs1054627	4	Secondary/extrinsic cardiomyopathies	425.2	Bone mineral density (femoral neck)	46	1.605	0.02646
Core matrisome	ECM Glycoproteins	IBSP	integrin-binding sialoprotein	5341	rs1054627	4	Cardiomegaly	416	Bone mineral density (femoral neck)	840	1.129	0.02677
Core matrisome	ECM Glycoproteins	IBSP	integrin-binding sialoprotein	5341	rs1054627	4	Cirrhosis of liver without mention of alcohol	571.51	Bone mineral density (femoral neck)	120	1.346	0.02721
Core matrisome	ECM Glycoproteins	IBSP	integrin-binding sialoprotein	5341	rs1054627	4	Hypersomnia	327.1	Bone mineral density (femoral neck)	102	1.372	0.0274
Core matrisome	ECM Glycoproteins	IBSP	integrin-binding sialoprotein	5341	rs1054627	4	Convulsions	345.3	Bone mineral density (femoral neck)	461	1.167	0.02812
Core matrisome	ECM Glycoproteins	IBSP	integrin-binding sialoprotein	5341	rs1054627	4	Retinal detachments and defects	361	Bone mineral density (femoral neck)	449	1.176	0.02941
Core matrisome	ECM Glycoproteins	IBSP	integrin-binding sialoprotein	5341	rs1054627	4	Redundant prepuce and phimosis/BXO	604.1	Bone mineral density (femoral neck)	70	1.524	0.03007
Core matrisome	ECM Glycoproteins	IBSP	integrin-binding sialoprotein	5341	rs1054627	4	Phosphorus metabolism disorder	275.53	Bone mineral density (femoral neck)	115	0.719	0.031
Core matrisome	ECM Glycoproteins	IBSP	integrin-binding sialoprotein	5341	rs1054627	4	Anxiety, phobic and dissociative disorders	300	Bone mineral density (femoral neck)	2477	0.9195	0.03135
Core matrisome	ECM Glycoproteins	IBSP	integrin-binding sialoprotein	5341	rs1054627	4	Cardiac pacemaker in situ	426.91	Bone mineral density (femoral neck)	506	1.181	0.03229
Core matrisome	ECM Glycoproteins	IBSP	integrin-binding sialoprotein	5341	rs1054627	4	Benign neoplasm of other parts of digestive system	211	Bone mineral density (femoral neck)	204	1.249	0.0325
Core matrisome	ECM Glycoproteins	IBSP	integrin-binding sialoprotein	5341	rs1054627	4	Aphasia/speech disturbance	292.1	Bone mineral density (femoral neck)	393	1.181	0.03432
Core matrisome	ECM Glycoproteins	IBSP	integrin-binding sialoprotein	5341	rs1054627	4	Frequency of urination and polyuria	599.5	Bone mineral density (femoral neck)	1457	0.905	0.03476
Core matrisome	ECM Glycoproteins	IBSP	integrin-binding sialoprotein	5341	rs1054627	4	Abnormal chest sounds	512.3	Bone mineral density (femoral neck)	118	1.336	0.03695
Core matrisome	ECM Glycoproteins	IBSP	integrin-binding sialoprotein	5341	rs1054627	4	Esophagitis, GERD and related diseases	530.1	Bone mineral density (femoral neck)	3548	0.9342	0.03706
Core matrisome	ECM Glycoproteins	IBSP	integrin-binding sialoprotein	5341	rs1054627	4	Dyschromia and Vitiligo	694	Bone mineral density (femoral neck)	513	1.154	0.03828
Core matrisome	ECM Glycoproteins	IBSP	integrin-binding sialoprotein	5341	rs1054627	4	Edema	782.3	Bone mineral density (femoral neck)	2137	1.083	0.03862
Core matrisome	ECM Glycoproteins	IBSP	integrin-binding sialoprotein	5341	rs1054627	4	Protein-calorie malnutrition	260	Bone mineral density (femoral neck)	690	0.8803	0.03932
Core matrisome	ECM Glycoproteins	IBSP	integrin-binding sialoprotein	5341	rs1054627	4	Periapical abscess	522.5	Bone mineral density (femoral neck)	481	1.164	0.03984
Core matrisome	ECM Glycoproteins	IBSP	integrin-binding sialoprotein	5341	rs1054627	4	Cardiomyopathy	425	Bone mineral density (femoral neck)	579	1.141	0.03987
Core matrisome	ECM Glycoproteins	IBSP	integrin-binding sialoprotein	5341	rs1054627	4	Bone cancer	170.1	Bone mineral density (femoral neck)	58	1.476	0.04022
Core matrisome	ECM Glycoproteins	IBSP	integrin-binding sialoprotein	5341	rs1054627	4	Memory loss	292.3	Bone mineral density (femoral neck)	381	0.839	0.04032
Core matrisome	ECM Glycoproteins	IBSP	integrin-binding sialoprotein	5341	rs1054627	4	Other conditions of brain	348	Bone mineral density (femoral neck)	205	1.235	0.04127
Core matrisome	ECM Glycoproteins	IBSP	integrin-binding sialoprotein	5341	rs1054627	4	Cellulitis and abscess of arm	681.3	Bone mineral density (femoral neck)	326	1.188	0.04261
Core matrisome	ECM Glycoproteins	IBSP	integrin-binding sialoprotein	5341	rs1054627	4	Dermatomycoses	110.2	Bone mineral density (femoral neck)	58	1.458	0.04491
Core matrisome	ECM Glycoproteins	IBSP	integrin-binding sialoprotein	5341	rs1054627	4	Malignant neoplasm of renal pelvis	189.12	Bone mineral density (femoral neck)	26	1.76	0.04498
Core matrisome	ECM Glycoproteins	IBSP	integrin-binding sialoprotein	5341	rs1054627	4	Agorophobia, social phobia, and panic disorder	300.12	Bone mineral density (femoral neck)	153	1.275	0.04543
Core matrisome	ECM Glycoproteins	IBSP	integrin-binding sialoprotein	5341	rs1054627	4	Visual field defects	368.4	Bone mineral density (femoral neck)	282	1.198	0.0455
Core matrisome	ECM Glycoproteins	IBSP	integrin-binding sialoprotein	5341	rs1054627	4	Arterial embolism and thrombosis	444	Bone mineral density (femoral neck)	383	0.8431	0.04585
Core matrisome	ECM Glycoproteins	IBSP	integrin-binding sialoprotein	5341	rs1054627	4	Abnormal coagulation profile	286.9	Bone mineral density (femoral neck)	166	1.265	0.04761
Core matrisome	ECM Glycoproteins	IBSP	integrin-binding sialoprotein	5341	rs1054627	4	Pain in joint	745	Bone mineral density (femoral neck)	7301	1.066	0.0479
Core matrisome	ECM Glycoproteins	IBSP	integrin-binding sialoprotein	5341	rs1054627	4	Transient cerebral ischemia	433.31	Bone mineral density (femoral neck)	951	0.8981	0.048
Core matrisome	ECM Glycoproteins	IBSP	integrin-binding sialoprotein	5341	rs1054627	4	Candidiasis	112	Bone mineral density (femoral neck)	570	0.8739	0.0482
Core matrisome	ECM Glycoproteins	IBSP	integrin-binding sialoprotein	5341	rs1054627	4	Cardiac defibrillator in situ	426.92	Bone mineral density (femoral neck)	130	1.307	0.04886
Core matrisome	ECM Glycoproteins	IBSP	integrin-binding sialoprotein	5341	rs1054627	4	Elevated sedimentation rate	790.1	Bone mineral density (femoral neck)	156	1.275	0.04964
Core matrisome	ECM Glycoproteins	LAMA2	laminin, alpha 2	6482	rs2275215	6 129861392	Open wound of finger(s)	871.2	Body mass index	761	0.787	4.499e-4
Core matrisome	ECM Glycoproteins	LAMA2	laminin, alpha 2	6482	rs2275215	6 129861392	Other arthropathies	716	Body mass index	1503	1.145	0.00233
Core matrisome	ECM Glycoproteins	LAMA2	laminin, alpha 2	6482	rs2275215	6 129861392	Sepsis	994.2	Body mass index	270	1.314	0.003364
Core matrisome	ECM Glycoproteins	LAMA2	laminin, alpha 2	6482	rs2275215	6 129861392	Sepsis and SIRS	994	Body mass index	290	1.302	0.003407
Core matrisome	ECM Glycoproteins	LAMA2	laminin, alpha 2	6482	rs2275215	6 129861392	Breast disorder NOS	613.9	Body mass index	25	2.331	0.003549
Core matrisome	ECM Glycoproteins	LAMA2	laminin, alpha 2	6482	rs2275215	6 129861392	Vitamin B12 deficiency anemia	281.12	Body mass index	84	1.58	0.004403
Core matrisome	ECM Glycoproteins	LAMA2	laminin, alpha 2	6482	rs2275215	6 129861392	Althete's foot	110.12	Body mass index	307	0.7679	0.007771
Core matrisome	ECM Glycoproteins	LAMA2	laminin, alpha 2	6482	rs2275215	6 129861392	Corneal dystrophy	364.5	Body mass index	253	0.7399	0.008652
Core matrisome	ECM Glycoproteins	LAMA2	laminin, alpha 2	6482	rs2275215	6 129861392	Arterial embolism and thrombosis	444	Body mass index	383	1.246	0.008738
Core matrisome	ECM Glycoproteins	LAMA2	laminin, alpha 2	6482	rs2275215	6 129861392	severe protein-calorie malnutrition	260.2	Body mass index	81	1.512	0.01188
Core matrisome	ECM Glycoproteins	LAMA2	laminin, alpha 2	6482	rs2275215	6 129861392	Incisional hernia	550.6	Body mass index	227	1.288	0.01227
Core matrisome	ECM Glycoproteins	LAMA2	laminin, alpha 2	6482	rs2275215	6 129861392	Anticoagulants causing adverse effects	964.1	Body mass index	63	1.603	0.01245
Core matrisome	ECM Glycoproteins	LAMA2	laminin, alpha 2	6482	rs2275215	6 129861392	Retinal edema and hypertensive retinopathy	362.9	Body mass index	220	0.744	0.01276
Core matrisome	ECM Glycoproteins	LAMA2	laminin, alpha 2	6482	rs2275215	6 129861392	Intestinal malabsorption NOS	557.9	Body mass index	59	1.612	0.01284
Core matrisome	ECM Glycoproteins	LAMA2	laminin, alpha 2	6482	rs2275215	6 129861392	Meningitis	320	Body mass index	50	0.5107	0.01382
Core matrisome	ECM Glycoproteins	LAMA2	laminin, alpha 2	6482	rs2275215	6 129861392	Arthropathy NOS	716.9	Body mass index	599	1.174	0.01519
Core matrisome	ECM Glycoproteins	LAMA2	laminin, alpha 2	6482	rs2275215	6 129861392	Visual field defects	368.4	Body mass index	282	0.787	0.01694
Core matrisome	ECM Glycoproteins	LAMA2	laminin, alpha 2	6482	rs2275215	6 129861392	Hyposmolality and/or hyponatremia	276.12	Body mass index	703	1.159	0.01739
Core matrisome	ECM Glycoproteins	LAMA2	laminin, alpha 2	6482	rs2275215	6 129861392	Periodontitis (acute or chronic)	523.3	Body mass index	418	0.8179	0.01759
Core matrisome	ECM Glycoproteins	LAMA2	laminin, alpha 2	6482	rs2275215	6 129861392	Hematuria	593	Body mass index	1939	1.11	0.01804
Core matrisome	ECM Glycoproteins	LAMA2	laminin, alpha 2	6482	rs2275215	6 129861392	Iatrogenic hypothyroidism	244.1	Body mass index	188	0.7444	0.01832
Core matrisome	ECM Glycoproteins	LAMA2	laminin, alpha 2	6482	rs2275215	6 129861392	Age-related macular degeneration	362.29	Body mass index	749	0.8395	0.01993
Core matrisome	ECM Glycoproteins	LAMA2	laminin, alpha 2	6482	rs2275215	6 129861392	Mitral stenosis/insufficiency	394.11	Body mass index	41	1.693	0.01995
Core matrisome	ECM Glycoproteins	LAMA2	laminin, alpha 2	6482	rs2275215	6 129861392	Arterial embolism and thrombosis of lower extremity artery	444.1	Body mass index	184	1.304	0.02044
Core matrisome	ECM Glycoproteins	LAMA2	laminin, alpha 2	6482	rs2275215	6 129861392	Hypotension	458	Body mass index	1167	1.121	0.02199
Core matrisome	ECM Glycoproteins	LAMA2	laminin, alpha 2	6482	rs2275215	6 129861392	Intestinal malabsorption	557	Body mass index	161	1.321	0.02392
Core matrisome	ECM Glycoproteins	LAMA2	laminin, alpha 2	6482	rs2275215	6 129861392	Nonrheumatic mitral valve disorders	395.1	Body mass index	949	1.13	0.02522
Core matrisome	ECM Glycoproteins	LAMA2	laminin, alpha 2	6482	rs2275215	6 129861392	Open wounds of extremities	871	Body mass index	1720	0.9028	0.02694
Core matrisome	ECM Glycoproteins	LAMA2	laminin, alpha 2	6482	rs2275215	6 129861392	Other diseases of lung	510	Body mass index	1180	1.116	0.02712
Core matrisome	ECM Glycoproteins	LAMA2	laminin, alpha 2	6482	rs2275215	6 129861392	Cornea replaced by transplant	364.9	Body mass index	49	0.5595	0.02737
Core matrisome	ECM Glycoproteins	LAMA2	laminin, alpha 2	6482	rs2275215	6 129861392	Acquired deformities of ankle and foot	735.4	Body mass index	403	0.8264	0.02764
Core matrisome	ECM Glycoproteins	LAMA2	laminin, alpha 2	6482	rs2275215	6 129861392	Macular degeneration	362.2	Body mass index	2304	0.8959	0.02799
Core matrisome	ECM Glycoproteins	LAMA2	laminin, alpha 2	6482	rs2275215	6 129861392	Visual disturbances	368	Body mass index	1645	0.9061	0.0281
Core matrisome	ECM Glycoproteins	LAMA2	laminin, alpha 2	6482	rs2275215	6 129861392	Extrinsic allergic alveolitis	500.1	Body mass index	32	1.773	0.02855
Core matrisome	ECM Glycoproteins	LAMA2	laminin, alpha 2	6482	rs2275215	6 129861392	Other sprains and strains	842	Body mass index	188	0.7586	0.02872
Core matrisome	ECM Glycoproteins	LAMA2	laminin, alpha 2	6482	rs2275215	6 129861392	Symptoms of the muscles	772	Body mass index	313	0.8089	0.02887
Core matrisome	ECM Glycoproteins	LAMA2	laminin, alpha 2	6482	rs2275215	6 129861392	Noninflammatory disorders of vagina	619.4	Body mass index	176	1.291	0.02989
Core matrisome	ECM Glycoproteins	LAMA2	laminin, alpha 2	6482	rs2275215	6 129861392	Mental disorders due to brain damage	291.4	Body mass index	435	0.8291	0.03081
Core matrisome	ECM Glycoproteins	LAMA2	laminin, alpha 2	6482	rs2275215	6 129861392	Other disorders of peritoneum	568	Body mass index	113	1.353	0.03342
Core matrisome	ECM Glycoproteins	LAMA2	laminin, alpha 2	6482	rs2275215	6 129861392	Attention deficit hyperactivity disorder	313.1	Body mass index	59	1.513	0.03353
Core matrisome	ECM Glycoproteins	LAMA2	laminin, alpha 2	6482	rs2275215	6 129861392	Corns and callosities	700	Body mass index	859	0.8787	0.03376
Core matrisome	ECM Glycoproteins	LAMA2	laminin, alpha 2	6482	rs2275215	6 129861392	Lymphoid leukemia	204.1	Body mass index	85	1.406	0.03399
Core matrisome	ECM Glycoproteins	LAMA2	laminin, alpha 2	6482	rs2275215	6 129861392	Wheezing	512.1	Body mass index	206	1.262	0.03517
Core matrisome	ECM Glycoproteins	LAMA2	laminin, alpha 2	6482	rs2275215	6 129861392	Eating disorder	305.2	Body mass index	64	1.481	0.03529
Core matrisome	ECM Glycoproteins	LAMA2	laminin, alpha 2	6482	rs2275215	6 129861392	Sebaceous cyst	706.2	Body mass index	1223	0.8974	0.03624
Core matrisome	ECM Glycoproteins	LAMA2	laminin, alpha 2	6482	rs2275215	6 129861392	Chronic lymphoid leukemia	204.12	Body mass index	79	1.414	0.03751
Core matrisome	ECM Glycoproteins	LAMA2	laminin, alpha 2	6482	rs2275215	6 129861392	Retinal disorders	362	Body mass index	3146	0.9137	0.0381
Core matrisome	ECM Glycoproteins	LAMA2	laminin, alpha 2	6482	rs2275215	6 129861392	Bacterial infection NOS	041	Body mass index	1040	1.111	0.03869
Core matrisome	ECM Glycoproteins	LAMA2	laminin, alpha 2	6482	rs2275215	6 129861392	Sensorineural hearing loss	389.1	Body mass index	2291	0.9183	0.03997
Core matrisome	ECM Glycoproteins	LAMA2	laminin, alpha 2	6482	rs2275215	6 129861392	Pernicious or B12 deficiency anemia	281	Body mass index	307	1.202	0.04029
Core matrisome	ECM Glycoproteins	LAMA2	laminin, alpha 2	6482	rs2275215	6 129861392	Adverse effects of insulins and antidiabetic agents	962.2	Body mass index	45	1.588	0.04105
Core matrisome	ECM Glycoproteins	LAMA2	laminin, alpha 2	6482	rs2275215	6 129861392	Thyroid cancer	193	Body mass index	94	0.6931	0.04217
Core matrisome	ECM Glycoproteins	LAMA2	laminin, alpha 2	6482	rs2275215	6 129861392	Hearing loss	389	Body mass index	3601	0.9317	0.0425
Core matrisome	ECM Glycoproteins	LAMA2	laminin, alpha 2	6482	rs2275215	6 129861392	Abnormal findings on radiological examination intrathoracic organs	793.2	Body mass index	503	1.166	0.04394
Core matrisome	ECM Glycoproteins	LAMA2	laminin, alpha 2	6482	rs2275215	6 129861392	Glomerulonephritis	580.1	Body mass index	60	1.468	0.04405
Core matrisome	ECM Glycoproteins	LAMA2	laminin, alpha 2	6482	rs2275215	6 129861392	Other signs and symptoms in breast	613.7	Body mass index	174	0.7667	0.0441
Core matrisome	ECM Glycoproteins	LAMA2	laminin, alpha 2	6482	rs2275215	6 129861392	Acute cystitis	592.11	Body mass index	156	1.292	0.04443
Core matrisome	ECM Glycoproteins	LAMA2	laminin, alpha 2	6482	rs2275215	6 129861392	Urticaria	947	Body mass index	361	0.8301	0.04472
Core matrisome	ECM Glycoproteins	LAMA2	laminin, alpha 2	6482	rs2275215	6 129861392	Lung disease due to external agents	500	Body mass index	82	1.397	0.0479
Core matrisome	ECM Glycoproteins	LAMA2	laminin, alpha 2	6482	rs2275215	6 129861392	Non-healing surgical wound	875	Body mass index	68	1.426	0.04818
Core matrisome	ECM Glycoproteins	LAMA2	laminin, alpha 2	6482	rs2275215	6 129861392	Hyperbilirubinemia	277.4	Body mass index	46	1.552	0.04825
Core matrisome	ECM Glycoproteins	LAMA2	laminin, alpha 2	6482	rs2275215	6 129861392	Cystitis	592.1	Body mass index	471	1.168	0.048280000000000003
Core matrisome	ECM Glycoproteins	LAMA2	laminin, alpha 2	6482	rs2275215	6 129861392	Digestive congenital anomalies	750	Body mass index	119	0.7336	0.04917
Core matrisome	ECM Glycoproteins	LAMA2	laminin, alpha 2	6482	rs2275215	6 129861392	Other benign neoplasm of connective and other soft tissue	215	Body mass index	99	1.347	0.04917
Core matrisome	ECM Glycoproteins	LAMA5	laminin, alpha 5	6485	rs4925386	20	Other disorders of adrenal glands	255.9	Colorectal cancer	88	1.736	3.314e-4
Core matrisome	ECM Glycoproteins	LAMA5	laminin, alpha 5	6485	rs4925386	20	Benign neoplasm of colon	208	Colorectal cancer	2841	0.8975	0.002272
Core matrisome	ECM Glycoproteins	LAMA5	laminin, alpha 5	6485	rs4925386	20	Nerve root lesions	353.2	Colorectal cancer	69	1.676	0.002949
Core matrisome	ECM Glycoproteins	LAMA5	laminin, alpha 5	6485	rs4925386	20	Other forms of chronic heart disease	414	Colorectal cancer	551	0.809	0.003701
Core matrisome	ECM Glycoproteins	LAMA5	laminin, alpha 5	6485	rs4925386	20	Miscarriage; stillbirth	634	Colorectal cancer	44	1.847	0.005746
Core matrisome	ECM Glycoproteins	LAMA5	laminin, alpha 5	6485	rs4925386	20	Umbilical hernia	550.4	Colorectal cancer	274	1.279	0.006861
Core matrisome	ECM Glycoproteins	LAMA5	laminin, alpha 5	6485	rs4925386	20	Noninfectious dermatoses of eyelid	371.33	Colorectal cancer	60	1.662	0.008311
Core matrisome	ECM Glycoproteins	LAMA5	laminin, alpha 5	6485	rs4925386	20	Cardiomegaly	416	Colorectal cancer	840	0.8617	0.01022
Core matrisome	ECM Glycoproteins	LAMA5	laminin, alpha 5	6485	rs4925386	20	Large cell lymphoma	202.24	Colorectal cancer	36	0.444	0.0104
Core matrisome	ECM Glycoproteins	LAMA5	laminin, alpha 5	6485	rs4925386	20	Disorders of adrenal glands	255	Colorectal cancer	193	1.308	0.01216
Core matrisome	ECM Glycoproteins	LAMA5	laminin, alpha 5	6485	rs4925386	20	Back pain	760	Colorectal cancer	4386	0.9243	0.01271
Core matrisome	ECM Glycoproteins	LAMA5	laminin, alpha 5	6485	rs4925386	20	Fracture of vertebral column without mention of spinal cord injury	805	Colorectal cancer	402	1.204	0.01647
Core matrisome	ECM Glycoproteins	LAMA5	laminin, alpha 5	6485	rs4925386	20	Postmenopausal bleeding	627.1	Colorectal cancer	591	0.8236	0.01686
Core matrisome	ECM Glycoproteins	LAMA5	laminin, alpha 5	6485	rs4925386	20	Cachexia	260.1	Colorectal cancer	32	0.4388	0.0176
Core matrisome	ECM Glycoproteins	LAMA5	laminin, alpha 5	6485	rs4925386	20	Rheumatoid arthritis & related inflammatory polyarthropathies	714	Colorectal cancer	511	0.8422	0.01842
Core matrisome	ECM Glycoproteins	LAMA5	laminin, alpha 5	6485	rs4925386	20	Keratoconjunctivitis, noninfectious	371.5	Colorectal cancer	111	0.6756	0.0187
Core matrisome	ECM Glycoproteins	LAMA5	laminin, alpha 5	6485	rs4925386	20	Hyposmolality and/or hyponatremia	276.12	Colorectal cancer	703	1.153	0.01892
Core matrisome	ECM Glycoproteins	LAMA5	laminin, alpha 5	6485	rs4925386	20	Temporomandibular joint disorders	526.4	Colorectal cancer	275	0.7912	0.0197
Core matrisome	ECM Glycoproteins	LAMA5	laminin, alpha 5	6485	rs4925386	20	Muscle/tendon sprain	840.1	Colorectal cancer	37	0.4928	0.02062
Core matrisome	ECM Glycoproteins	LAMA5	laminin, alpha 5	6485	rs4925386	20	Biliary cirrhosis	571.6	Colorectal cancer	26	1.915	0.02079
Core matrisome	ECM Glycoproteins	LAMA5	laminin, alpha 5	6485	rs4925386	20	Other rheumatic heart disease	420.4	Colorectal cancer	34	0.4783	0.02139
Core matrisome	ECM Glycoproteins	LAMA5	laminin, alpha 5	6485	rs4925386	20	Other disorders of the kidney and ureters	586	Colorectal cancer	1530	0.9032	0.02203
Core matrisome	ECM Glycoproteins	LAMA5	laminin, alpha 5	6485	rs4925386	20	Failure to thrive	264.2	Colorectal cancer	144	1.331	0.02368
Core matrisome	ECM Glycoproteins	LAMA5	laminin, alpha 5	6485	rs4925386	20	Anal and rectal polyp	565.1	Colorectal cancer	338	0.8154	0.02389
Core matrisome	ECM Glycoproteins	LAMA5	laminin, alpha 5	6485	rs4925386	20	Nerve root and plexus disorders	353	Colorectal cancer	213	1.263	0.02393
Core matrisome	ECM Glycoproteins	LAMA5	laminin, alpha 5	6485	rs4925386	20	Urinary obstruction	599.1	Colorectal cancer	149	0.7308	0.0255
Core matrisome	ECM Glycoproteins	LAMA5	laminin, alpha 5	6485	rs4925386	20	Cystoid macular degeneration of retina	362.23	Colorectal cancer	254	1.254	0.02731
Core matrisome	ECM Glycoproteins	LAMA5	laminin, alpha 5	6485	rs4925386	20	Symptoms associated with female genital organs	625	Colorectal cancer	632	0.8585	0.02817
Core matrisome	ECM Glycoproteins	LAMA5	laminin, alpha 5	6485	rs4925386	20	Leukoplakia of oral mucosa	528.6	Colorectal cancer	44	1.612	0.02824
Core matrisome	ECM Glycoproteins	LAMA5	laminin, alpha 5	6485	rs4925386	20	Chronic hepatitis	070.4	Colorectal cancer	46	1.592	0.02883
Core matrisome	ECM Glycoproteins	LAMA5	laminin, alpha 5	6485	rs4925386	20	Abnormal electrocardiogram	426.7	Colorectal cancer	1338	0.8865	0.029
Core matrisome	ECM Glycoproteins	LAMA5	laminin, alpha 5	6485	rs4925386	20	Urethral hypermobility/ISD	597.8	Colorectal cancer	69	0.6402	0.02962
Core matrisome	ECM Glycoproteins	LAMA5	laminin, alpha 5	6485	rs4925386	20	Other pulmonary inflamation or edema	505	Colorectal cancer	204	0.7817	0.03159
Core matrisome	ECM Glycoproteins	LAMA5	laminin, alpha 5	6485	rs4925386	20	pulmonary heart disease	415	Colorectal cancer	772	0.8813	0.03374
Core matrisome	ECM Glycoproteins	LAMA5	laminin, alpha 5	6485	rs4925386	20	Acute bronchospasm	498	Colorectal cancer	26	1.81	0.03492
Core matrisome	ECM Glycoproteins	LAMA5	laminin, alpha 5	6485	rs4925386	20	Late effects of cerebrovascular disease	433.8	Colorectal cancer	675	0.8717	0.03565
Core matrisome	ECM Glycoproteins	LAMA5	laminin, alpha 5	6485	rs4925386	20	Gouty arthropathy	274.11	Colorectal cancer	226	0.7966	0.03751
Core matrisome	ECM Glycoproteins	LAMA5	laminin, alpha 5	6485	rs4925386	20	Lack of normal physiological development	264	Colorectal cancer	165	1.276	0.03817
Core matrisome	ECM Glycoproteins	LAMA5	laminin, alpha 5	6485	rs4925386	20	Acid-base balance disorder	276.4	Colorectal cancer	215	0.7943	0.03855
Core matrisome	ECM Glycoproteins	LAMA5	laminin, alpha 5	6485	rs4925386	20	Paroxysmal ventricular tachycardia	427.12	Colorectal cancer	289	0.8115	0.039
Core matrisome	ECM Glycoproteins	LAMA5	laminin, alpha 5	6485	rs4925386	20	Hypoventilation	513.3	Colorectal cancer	52	1.511	0.04128
Core matrisome	ECM Glycoproteins	LAMA5	laminin, alpha 5	6485	rs4925386	20	Swelling of limb	771.1	Colorectal cancer	706	1.131	0.04142
Core matrisome	ECM Glycoproteins	LAMA5	laminin, alpha 5	6485	rs4925386	20	Chronic venous hypertension	453	Colorectal cancer	31	0.5029	0.04197
Core matrisome	ECM Glycoproteins	LAMA5	laminin, alpha 5	6485	rs4925386	20	Behcet's syndrome	743.12	Colorectal cancer	95	0.6935	0.0421
Core matrisome	ECM Glycoproteins	LAMA5	laminin, alpha 5	6485	rs4925386	20	Keratoconjunctivitis sicca	371.51	Colorectal cancer	70	0.6503	0.04263
Core matrisome	ECM Glycoproteins	LAMA5	laminin, alpha 5	6485	rs4925386	20	Muscular wasting and disuse atrophy	772.1	Colorectal cancer	67	0.6553	0.0429
Core matrisome	ECM Glycoproteins	LAMA5	laminin, alpha 5	6485	rs4925386	20	Other infectious diseases	136	Colorectal cancer	50	0.6094	0.04367
Core matrisome	ECM Glycoproteins	LAMA5	laminin, alpha 5	6485	rs4925386	20	Ischemic stroke	433.21	Colorectal cancer	510	0.8639	0.04592
Core matrisome	ECM Glycoproteins	LAMA5	laminin, alpha 5	6485	rs4925386	20	Congenital anomalies of face and neck	749	Colorectal cancer	26	0.4807	0.04613
Core matrisome	ECM Glycoproteins	LAMA5	laminin, alpha 5	6485	rs4925386	20	Vitamin D deficiency	261.4	Colorectal cancer	238	1.216	0.0463
Core matrisome	ECM Glycoproteins	LAMA5	laminin, alpha 5	6485	rs4925386	20	Colon cancer	153.2	Colorectal cancer	346	0.8399	0.0465
Core matrisome	ECM Glycoproteins	LAMA5	laminin, alpha 5	6485	rs4925386	20	Mycoses	117	Colorectal cancer	80	0.6889	0.0473
Core matrisome	ECM Glycoproteins	LAMA5	laminin, alpha 5	6485	rs4925386	20	Acute tonsillitis	474.1	Colorectal cancer	84	1.434	0.04731
Core matrisome	ECM Glycoproteins	LAMA5	laminin, alpha 5	6485	rs4925386	20	Rheumatoid arthritis	714.1	Colorectal cancer	398	0.8504	0.04735
Core matrisome	ECM Glycoproteins	LAMA5	laminin, alpha 5	6485	rs4925386	20	Spontaneous ecchymoses	287.1	Colorectal cancer	70	0.6691	0.04822
Core matrisome	ECM Glycoproteins	LAMA5	laminin, alpha 5	6485	rs4925386	20	Adjustment reaction	304	Colorectal cancer	1056	1.115	0.04895
Core matrisome	ECM Glycoproteins	LAMB1	laminin, beta 1	6486	rs2158836	7 107580839	Choroidal degenerations	363.4	Ulcerative colitis	133	1.576	5.789e-4
Core matrisome	ECM Glycoproteins	LAMB1	laminin, beta 1	6486	rs2158836	7 107580839	Disorders of choroid	363	Ulcerative colitis	264	1.344	0.002118
Core matrisome	ECM Glycoproteins	LAMB1	laminin, beta 1	6486	rs2158836	7 107580839	Anemia in chronic kidney disease	285.21	Ulcerative colitis	230	1.311	0.004946
Core matrisome	ECM Glycoproteins	LAMB1	laminin, beta 1	6486	rs2158836	7 107580839	Allergies, other	949	Ulcerative colitis	323	0.7856	0.005497
Core matrisome	ECM Glycoproteins	LAMB1	laminin, beta 1	6486	rs2158836	7 107580839	Hypotension	458	Ulcerative colitis	1167	0.8789	0.00593
Core matrisome	ECM Glycoproteins	LAMB1	laminin, beta 1	6486	rs2158836	7 107580839	Hallucinations	292.6	Ulcerative colitis	42	0.5	0.006136
Core matrisome	ECM Glycoproteins	LAMB1	laminin, beta 1	6486	rs2158836	7 107580839	Allergic conjunctivitis	371.21	Ulcerative colitis	328	0.7802	0.006719
Core matrisome	ECM Glycoproteins	LAMB1	laminin, beta 1	6486	rs2158836	7 107580839	Barrett's esophagus	530.13	Ulcerative colitis	153	0.7166	0.007459
Core matrisome	ECM Glycoproteins	LAMB1	laminin, beta 1	6486	rs2158836	7 107580839	Retinoschisis and retinal cysts	361.2	Ulcerative colitis	30	1.998	0.007724
Core matrisome	ECM Glycoproteins	LAMB1	laminin, beta 1	6486	rs2158836	7 107580839	Bullous dermatoses	695.2	Ulcerative colitis	41	1.796	0.008095
Core matrisome	ECM Glycoproteins	LAMB1	laminin, beta 1	6486	rs2158836	7 107580839	Stiffness of joint	741.2	Ulcerative colitis	504	1.191	0.0093
Core matrisome	ECM Glycoproteins	LAMB1	laminin, beta 1	6486	rs2158836	7 107580839	Duodenitis	535.6	Ulcerative colitis	147	0.7268	0.01209
Core matrisome	ECM Glycoproteins	LAMB1	laminin, beta 1	6486	rs2158836	7 107580839	Hypotension NOS	458.9	Ulcerative colitis	605	0.8555	0.01272
Core matrisome	ECM Glycoproteins	LAMB1	laminin, beta 1	6486	rs2158836	7 107580839	Rash and other nonspecific skin eruption	687.1	Ulcerative colitis	803	0.87	0.01274
Core matrisome	ECM Glycoproteins	LAMB1	laminin, beta 1	6486	rs2158836	7 107580839	Adrenal hyperfunction	255.1	Ulcerative colitis	42	1.726	0.01327
Core matrisome	ECM Glycoproteins	LAMB1	laminin, beta 1	6486	rs2158836	7 107580839	Elevated levels of transaminase or lactic acid dehydrogenase	573.91	Ulcerative colitis	522	0.8461	0.01379
Core matrisome	ECM Glycoproteins	LAMB1	laminin, beta 1	6486	rs2158836	7 107580839	Hydronephrosis	595	Ulcerative colitis	191	0.7721	0.01698
Core matrisome	ECM Glycoproteins	LAMB1	laminin, beta 1	6486	rs2158836	7 107580839	Retinal hemorrhage/ischemia	362.8	Ulcerative colitis	162	1.323	0.01771
Core matrisome	ECM Glycoproteins	LAMB1	laminin, beta 1	6486	rs2158836	7 107580839	Conjunctivitis, noninfectious	371.2	Ulcerative colitis	424	0.8227	0.01808
Core matrisome	ECM Glycoproteins	LAMB1	laminin, beta 1	6486	rs2158836	7 107580839	Other infectious diseases	136	Ulcerative colitis	50	1.599	0.01816
Core matrisome	ECM Glycoproteins	LAMB1	laminin, beta 1	6486	rs2158836	7 107580839	Renal failure	585	Ulcerative colitis	2061	1.089	0.02048
Core matrisome	ECM Glycoproteins	LAMB1	laminin, beta 1	6486	rs2158836	7 107580839	Mastoiditis	381.3	Ulcerative colitis	29	0.4917	0.02109
Core matrisome	ECM Glycoproteins	LAMB1	laminin, beta 1	6486	rs2158836	7 107580839	Substance addiction and disorders	316	Ulcerative colitis	246	0.801	0.02153
Core matrisome	ECM Glycoproteins	LAMB1	laminin, beta 1	6486	rs2158836	7 107580839	Hyperpotassemia	276.13	Ulcerative colitis	539	1.16	0.02168
Core matrisome	ECM Glycoproteins	LAMB1	laminin, beta 1	6486	rs2158836	7 107580839	Poisoning by other anti-infectives	961	Ulcerative colitis	425	0.8337	0.02221
Core matrisome	ECM Glycoproteins	LAMB1	laminin, beta 1	6486	rs2158836	7 107580839	Hepatic cancer, primary	155.1	Ulcerative colitis	30	1.798	0.02287
Core matrisome	ECM Glycoproteins	LAMB1	laminin, beta 1	6486	rs2158836	7 107580839	Abnormal serum enzyme levels	573.9	Ulcerative colitis	999	0.8917	0.02399
Core matrisome	ECM Glycoproteins	LAMB1	laminin, beta 1	6486	rs2158836	7 107580839	Abnormal tumor markers, elevated CEA or CA 125	795.8	Ulcerative colitis	30	0.5117	0.02437
Core matrisome	ECM Glycoproteins	LAMB1	laminin, beta 1	6486	rs2158836	7 107580839	Macular degeneration, wet	362.22	Ulcerative colitis	252	1.265	0.02445
Core matrisome	ECM Glycoproteins	LAMB1	laminin, beta 1	6486	rs2158836	7 107580839	Early or threatened labor; hemorrhage in early pregnancy	636	Ulcerative colitis	68	1.509	0.02531
Core matrisome	ECM Glycoproteins	LAMB1	laminin, beta 1	6486	rs2158836	7 107580839	Poisoning by agents affecting the cardiovascular system	972	Ulcerative colitis	223	0.796	0.02774
Core matrisome	ECM Glycoproteins	LAMB1	laminin, beta 1	6486	rs2158836	7 107580839	Uterine cancer	182	Ulcerative colitis	129	0.7454	0.02887
Core matrisome	ECM Glycoproteins	LAMB1	laminin, beta 1	6486	rs2158836	7 107580839	Arthropathy associated with other disorders classified elsewhere	713	Ulcerative colitis	48	0.609	0.0292
Core matrisome	ECM Glycoproteins	LAMB1	laminin, beta 1	6486	rs2158836	7 107580839	Fuchs' dystrophy	364.51	Ulcerative colitis	107	1.362	0.02952
Core matrisome	ECM Glycoproteins	LAMB1	laminin, beta 1	6486	rs2158836	7 107580839	Injuries to the nervous system	907	Ulcerative colitis	78	0.6867	0.02981
Core matrisome	ECM Glycoproteins	LAMB1	laminin, beta 1	6486	rs2158836	7 107580839	Other diseases of the teeth and supporting structures	525	Ulcerative colitis	330	0.8347	0.03033
Core matrisome	ECM Glycoproteins	LAMB1	laminin, beta 1	6486	rs2158836	7 107580839	Chronic prostatitis	601.12	Ulcerative colitis	96	1.387	0.03137
Core matrisome	ECM Glycoproteins	LAMB1	laminin, beta 1	6486	rs2158836	7 107580839	Cerebral aneurysm	433.5	Ulcerative colitis	60	1.487	0.03142
Core matrisome	ECM Glycoproteins	LAMB1	laminin, beta 1	6486	rs2158836	7 107580839	Leukemia	204	Ulcerative colitis	192	1.246	0.03219
Core matrisome	ECM Glycoproteins	LAMB1	laminin, beta 1	6486	rs2158836	7 107580839	Hypertension complicating pregnancy	642	Ulcerative colitis	35	1.723	0.03221
Core matrisome	ECM Glycoproteins	LAMB1	laminin, beta 1	6486	rs2158836	7 107580839	Corns and callosities	700	Ulcerative colitis	859	1.122	0.03315
Core matrisome	ECM Glycoproteins	LAMB1	laminin, beta 1	6486	rs2158836	7 107580839	Retinal drusen	362.27	Ulcerative colitis	532	1.175	0.03369
Core matrisome	ECM Glycoproteins	LAMB1	laminin, beta 1	6486	rs2158836	7 107580839	Other headache syndromes	339	Ulcerative colitis	2204	0.9257	0.03441
Core matrisome	ECM Glycoproteins	LAMB1	laminin, beta 1	6486	rs2158836	7 107580839	Arthropathy associated with neurological disorders	713.5	Ulcerative colitis	40	0.5895	0.03525
Core matrisome	ECM Glycoproteins	LAMB1	laminin, beta 1	6486	rs2158836	7 107580839	Localized adiposity	278.3	Ulcerative colitis	37	0.5745	0.03537
Core matrisome	ECM Glycoproteins	LAMB1	laminin, beta 1	6486	rs2158836	7 107580839	Adverse effects of hormones and synthetic substitutes	962.3	Ulcerative colitis	25	1.812	0.03783
Core matrisome	ECM Glycoproteins	LAMB1	laminin, beta 1	6486	rs2158836	7 107580839	Loss of teeth or edentulism	525.1	Ulcerative colitis	163	0.7811	0.03787
Core matrisome	ECM Glycoproteins	LAMB1	laminin, beta 1	6486	rs2158836	7 107580839	Acquired hemolytic anemias	283	Ulcerative colitis	34	0.5646	0.03858
Core matrisome	ECM Glycoproteins	LAMB1	laminin, beta 1	6486	rs2158836	7 107580839	Peyronie's disease	604.3	Ulcerative colitis	44	1.573	0.03864
Core matrisome	ECM Glycoproteins	LAMB1	laminin, beta 1	6486	rs2158836	7 107580839	Cellulitis and abscess of foot/toes	681.6	Ulcerative colitis	253	1.207	0.03884
Core matrisome	ECM Glycoproteins	LAMB1	laminin, beta 1	6486	rs2158836	7 107580839	Pelvic inflammatory disease	614.3	Ulcerative colitis	36	0.5739	0.04137
Core matrisome	ECM Glycoproteins	LAMB1	laminin, beta 1	6486	rs2158836	7 107580839	Keratoconjunctivitis, noninfectious	371.5	Ulcerative colitis	111	0.7465	0.0445
Core matrisome	ECM Glycoproteins	LAMB1	laminin, beta 1	6486	rs2158836	7 107580839	Lesions of stomach and duodenum	537.1	Ulcerative colitis	34	1.63	0.04511
Core matrisome	ECM Glycoproteins	LAMB1	laminin, beta 1	6486	rs2158836	7 107580839	Fractur of unspecified part of femur	800.2	Ulcerative colitis	131	0.7659	0.0454
Core matrisome	ECM Glycoproteins	LAMB1	laminin, beta 1	6486	rs2158836	7 107580839	Nausea and vomiting	789	Ulcerative colitis	1851	0.927	0.04576
Core matrisome	ECM Glycoproteins	LAMB1	laminin, beta 1	6486	rs2158836	7 107580839	Migraine	340	Ulcerative colitis	744	0.8909	0.04604
Core matrisome	ECM Glycoproteins	LAMB1	laminin, beta 1	6486	rs2158836	7 107580839	Symptoms involving cardiovascular system	429.3	Ulcerative colitis	880	1.116	0.04639
Core matrisome	ECM Glycoproteins	LAMB1	laminin, beta 1	6486	rs2158836	7 107580839	Neurological disorders due to brain damage	292	Ulcerative colitis	1252	0.9109	0.04765
Core matrisome	ECM Glycoproteins	LAMB1	laminin, beta 1	6486	rs2158836	7 107580839	Known or suspected fetal abnormality	655	Ulcerative colitis	69	1.447	0.04842
Core matrisome	ECM Glycoproteins	LAMB1	laminin, beta 1	6486	rs2158836	7 107580839	Other local infections of skin and subcutaneous tissue	686	Ulcerative colitis	697	1.122	0.04853
Core matrisome	ECM Glycoproteins	LAMB1	laminin, beta 1	6486	rs2158836	7 107580839	Lyme disease	130.1	Ulcerative colitis	83	1.359	0.0488
Core matrisome	ECM Glycoproteins	LAMB1	laminin, beta 1	6486	rs2158836	7 107580839	Carditis	420	Ulcerative colitis	362	0.857	0.04912
Core matrisome	ECM Glycoproteins	LAMB1	laminin, beta 1	6486	rs2158836	7 107580839	Chronic cystitis	592.12	Ulcerative colitis	95	0.7332	0.0498
Core matrisome	ECM Glycoproteins	LAMC2	laminin, gamma 2	6493	rs525410	1	Encounter for long-term use of aspirin	457.3	Systemic lupus erythematosus	246	0.7187	7.17e-4
Core matrisome	ECM Glycoproteins	LAMC2	laminin, gamma 2	6493	rs525410	1	Graves' disease	242.1	Systemic lupus erythematosus	102	0.6168	0.001086
Core matrisome	ECM Glycoproteins	LAMC2	laminin, gamma 2	6493	rs525410	1	Acquired hypothyroidism	244.2	Systemic lupus erythematosus	45	2.071	0.0012979999999999999
Core matrisome	ECM Glycoproteins	LAMC2	laminin, gamma 2	6493	rs525410	1	Encounter for long-term use of anticoagulants/antithrombotics	457	Systemic lupus erythematosus	309	0.7599	0.001759
Core matrisome	ECM Glycoproteins	LAMC2	laminin, gamma 2	6493	rs525410	1	Other sprains and strains	842	Systemic lupus erythematosus	188	0.7205	0.00347
Core matrisome	ECM Glycoproteins	LAMC2	laminin, gamma 2	6493	rs525410	1	Conductive hearing loss	389.2	Systemic lupus erythematosus	85	0.6251	0.003502
Core matrisome	ECM Glycoproteins	LAMC2	laminin, gamma 2	6493	rs525410	1	Other disorders of metabolism	277	Systemic lupus erythematosus	69	1.669	0.003665
Core matrisome	ECM Glycoproteins	LAMC2	laminin, gamma 2	6493	rs525410	1	Other dyschromia	694.2	Systemic lupus erythematosus	310	0.7875	0.00451
Core matrisome	ECM Glycoproteins	LAMC2	laminin, gamma 2	6493	rs525410	1	Systemic sclerosis	709.3	Systemic lupus erythematosus	88	0.6363	0.005412
Core matrisome	ECM Glycoproteins	LAMC2	laminin, gamma 2	6493	rs525410	1	Pain, swelling or discharge of eye	379.9	Systemic lupus erythematosus	175	0.7257	0.005668
Core matrisome	ECM Glycoproteins	LAMC2	laminin, gamma 2	6493	rs525410	1	Disturbances of sulphur-bearing amino-acid metabolism	270.11	Systemic lupus erythematosus	44	0.5336	0.006253
Core matrisome	ECM Glycoproteins	LAMC2	laminin, gamma 2	6493	rs525410	1	Joint/ligament sprain	840.3	Systemic lupus erythematosus	228	0.7552	0.006552
Core matrisome	ECM Glycoproteins	LAMC2	laminin, gamma 2	6493	rs525410	1	Optic atrophy	377.1	Systemic lupus erythematosus	116	0.6874	0.007073
Core matrisome	ECM Glycoproteins	LAMC2	laminin, gamma 2	6493	rs525410	1	Disturbances of amino-acid transport	270.1	Systemic lupus erythematosus	45	0.5436	0.007154
Core matrisome	ECM Glycoproteins	LAMC2	laminin, gamma 2	6493	rs525410	1	Keratitis	370	Systemic lupus erythematosus	243	0.7689	0.007637
Core matrisome	ECM Glycoproteins	LAMC2	laminin, gamma 2	6493	rs525410	1	Other disorders of metabolic, endocrine, immunity disorders	277.9	Systemic lupus erythematosus	37	1.901	0.008543
Core matrisome	ECM Glycoproteins	LAMC2	laminin, gamma 2	6493	rs525410	1	Spasm of muscle	772.2	Systemic lupus erythematosus	402	1.208	0.009426
Core matrisome	ECM Glycoproteins	LAMC2	laminin, gamma 2	6493	rs525410	1	Extrinsic allergic alveolitis	500.1	Systemic lupus erythematosus	32	1.954	0.01035
Core matrisome	ECM Glycoproteins	LAMC2	laminin, gamma 2	6493	rs525410	1	Benign neoplasm of skin	216	Systemic lupus erythematosus	2106	1.097	0.01053
Core matrisome	ECM Glycoproteins	LAMC2	laminin, gamma 2	6493	rs525410	1	Eustachian tube disorders	381	Systemic lupus erythematosus	1425	0.8966	0.01093
Core matrisome	ECM Glycoproteins	LAMC2	laminin, gamma 2	6493	rs525410	1	Hematuria	593	Systemic lupus erythematosus	1939	0.9038	0.01147
Core matrisome	ECM Glycoproteins	LAMC2	laminin, gamma 2	6493	rs525410	1	Herpes simplex	054	Systemic lupus erythematosus	228	1.281	0.01164
Core matrisome	ECM Glycoproteins	LAMC2	laminin, gamma 2	6493	rs525410	1	Secondary malignant neoplasm of liver	198.4	Systemic lupus erythematosus	154	0.7436	0.01178
Core matrisome	ECM Glycoproteins	LAMC2	laminin, gamma 2	6493	rs525410	1	Disorders of optic nerve and visual pathways	377	Systemic lupus erythematosus	332	0.8095	0.01241
Core matrisome	ECM Glycoproteins	LAMC2	laminin, gamma 2	6493	rs525410	1	Respiratory abnormalities	513	Systemic lupus erythematosus	206	1.274	0.01614
Core matrisome	ECM Glycoproteins	LAMC2	laminin, gamma 2	6493	rs525410	1	Breast disorder NOS	613.9	Systemic lupus erythematosus	25	2.052	0.01649
Core matrisome	ECM Glycoproteins	LAMC2	laminin, gamma 2	6493	rs525410	1	Fracture of humerus	803.1	Systemic lupus erythematosus	331	0.8205	0.01664
Core matrisome	ECM Glycoproteins	LAMC2	laminin, gamma 2	6493	rs525410	1	Renal colic	594.8	Systemic lupus erythematosus	59	0.6481	0.02375
Core matrisome	ECM Glycoproteins	LAMC2	laminin, gamma 2	6493	rs525410	1	Anomalies of jaw size/symmetry	526.3	Systemic lupus erythematosus	31	1.819	0.02403
Core matrisome	ECM Glycoproteins	LAMC2	laminin, gamma 2	6493	rs525410	1	Type 2 diabetes	250.2	Systemic lupus erythematosus	3122	0.9327	0.02419
Core matrisome	ECM Glycoproteins	LAMC2	laminin, gamma 2	6493	rs525410	1	Abnormal serum enzyme levels	573.9	Systemic lupus erythematosus	999	0.8929	0.02423
Core matrisome	ECM Glycoproteins	LAMC2	laminin, gamma 2	6493	rs525410	1	Disorders of diaphragm	513.8	Systemic lupus erythematosus	38	1.704	0.02456
Core matrisome	ECM Glycoproteins	LAMC2	laminin, gamma 2	6493	rs525410	1	Bullous dermatoses	695.2	Systemic lupus erythematosus	41	0.5948	0.0248
Core matrisome	ECM Glycoproteins	LAMC2	laminin, gamma 2	6493	rs525410	1	Localized adiposity	278.3	Systemic lupus erythematosus	37	1.725	0.02482
Core matrisome	ECM Glycoproteins	LAMC2	laminin, gamma 2	6493	rs525410	1	Orthostatic hypotension	458.1	Systemic lupus erythematosus	461	0.8543	0.02519
Core matrisome	ECM Glycoproteins	LAMC2	laminin, gamma 2	6493	rs525410	1	Empyema and pneumothorax	506	Systemic lupus erythematosus	228	0.8062	0.02544
Core matrisome	ECM Glycoproteins	LAMC2	laminin, gamma 2	6493	rs525410	1	Other unspecified back disorders	724.9	Systemic lupus erythematosus	81	1.434	0.02629
Core matrisome	ECM Glycoproteins	LAMC2	laminin, gamma 2	6493	rs525410	1	Hypercholesterolemia	272.11	Systemic lupus erythematosus	4518	0.9161	0.02657
Core matrisome	ECM Glycoproteins	LAMC2	laminin, gamma 2	6493	rs525410	1	Other signs and symptoms in breast	613.7	Systemic lupus erythematosus	174	1.285	0.02659
Core matrisome	ECM Glycoproteins	LAMC2	laminin, gamma 2	6493	rs525410	1	Diffuse diseases of connective tissue	709	Systemic lupus erythematosus	288	0.8227	0.02675
Core matrisome	ECM Glycoproteins	LAMC2	laminin, gamma 2	6493	rs525410	1	Anisometropia	368.3	Systemic lupus erythematosus	221	0.8055	0.02794
Core matrisome	ECM Glycoproteins	LAMC2	laminin, gamma 2	6493	rs525410	1	Optic neuritis/neuropathy	377.3	Systemic lupus erythematosus	200	0.7893	0.02848
Core matrisome	ECM Glycoproteins	LAMC2	laminin, gamma 2	6493	rs525410	1	Otitis media	381.1	Systemic lupus erythematosus	1063	0.8979	0.02888
Core matrisome	ECM Glycoproteins	LAMC2	laminin, gamma 2	6493	rs525410	1	Dyschromia and Vitiligo	694	Systemic lupus erythematosus	513	0.8654	0.03004
Core matrisome	ECM Glycoproteins	LAMC2	laminin, gamma 2	6493	rs525410	1	Cholelithiasis with other cholecystitis	574.12	Systemic lupus erythematosus	243	0.8174	0.03216
Core matrisome	ECM Glycoproteins	LAMC2	laminin, gamma 2	6493	rs525410	1	Hallux valgus (Bunion)	735.3	Systemic lupus erythematosus	667	1.143	0.03317
Core matrisome	ECM Glycoproteins	LAMC2	laminin, gamma 2	6493	rs525410	1	Perforation of tympanic membrane	384.4	Systemic lupus erythematosus	92	0.7231	0.03323
Core matrisome	ECM Glycoproteins	LAMC2	laminin, gamma 2	6493	rs525410	1	Cancer of oropharynx	149.1	Systemic lupus erythematosus	30	0.557	0.03361
Core matrisome	ECM Glycoproteins	LAMC2	laminin, gamma 2	6493	rs525410	1	Lyme disease	130.1	Systemic lupus erythematosus	83	1.399	0.03426
Core matrisome	ECM Glycoproteins	LAMC2	laminin, gamma 2	6493	rs525410	1	Inflammatory disease of breast	613.1	Systemic lupus erythematosus	84	1.394	0.03577
Core matrisome	ECM Glycoproteins	LAMC2	laminin, gamma 2	6493	rs525410	1	Carbohydrate transport and metabolism disorder	271	Systemic lupus erythematosus	668	1.132	0.03577
Core matrisome	ECM Glycoproteins	LAMC2	laminin, gamma 2	6493	rs525410	1	Phosphorus metabolism disorder	275.53	Systemic lupus erythematosus	115	1.326	0.03582
Core matrisome	ECM Glycoproteins	LAMC2	laminin, gamma 2	6493	rs525410	1	Retinal hemorrhage/ischemia	362.8	Systemic lupus erythematosus	162	0.7757	0.03641
Core matrisome	ECM Glycoproteins	LAMC2	laminin, gamma 2	6493	rs525410	1	Bacterial pneumonia	480.1	Systemic lupus erythematosus	243	1.217	0.03734
Core matrisome	ECM Glycoproteins	LAMC2	laminin, gamma 2	6493	rs525410	1	Diabetes mellitus	250	Systemic lupus erythematosus	3231	0.9386	0.03788
Core matrisome	ECM Glycoproteins	LAMC2	laminin, gamma 2	6493	rs525410	1	Cancer of brain and nervous system	191.1	Systemic lupus erythematosus	68	0.6931	0.03853
Core matrisome	ECM Glycoproteins	LAMC2	laminin, gamma 2	6493	rs525410	1	Coma; stupor; and brain damage	348.1	Systemic lupus erythematosus	765	0.8922	0.03908
Core matrisome	ECM Glycoproteins	LAMC2	laminin, gamma 2	6493	rs525410	1	Cancer of larynx	149.4	Systemic lupus erythematosus	101	0.7433	0.04105
Core matrisome	ECM Glycoproteins	LAMC2	laminin, gamma 2	6493	rs525410	1	Secondary malignancy of lung	198.2	Systemic lupus erythematosus	140	0.7776	0.04116
Core matrisome	ECM Glycoproteins	LAMC2	laminin, gamma 2	6493	rs525410	1	Premenstrual tension syndromes	626.4	Systemic lupus erythematosus	86	0.6167	0.04288
Core matrisome	ECM Glycoproteins	LAMC2	laminin, gamma 2	6493	rs525410	1	Spontaneous ecchymoses	287.1	Systemic lupus erythematosus	70	0.7002	0.04406
Core matrisome	ECM Glycoproteins	LAMC2	laminin, gamma 2	6493	rs525410	1	Other disorders of thyroid	246	Systemic lupus erythematosus	212	0.8172	0.04504
Core matrisome	ECM Glycoproteins	LAMC2	laminin, gamma 2	6493	rs525410	1	Pyogenic granuloma	686.4	Systemic lupus erythematosus	43	1.561	0.04523
Core matrisome	ECM Glycoproteins	LAMC2	laminin, gamma 2	6493	rs525410	1	Disaccharide malabsorption	271.3	Systemic lupus erythematosus	656	1.126	0.04531
Core matrisome	ECM Glycoproteins	LAMC2	laminin, gamma 2	6493	rs525410	1	Thyrotoxicosis	242	Systemic lupus erythematosus	361	0.8558	0.04595
Core matrisome	ECM Glycoproteins	LAMC2	laminin, gamma 2	6493	rs525410	1	Chronic liver disease and cirrhosis	571	Systemic lupus erythematosus	377	0.8602	0.04624
Core matrisome	ECM Glycoproteins	LAMC2	laminin, gamma 2	6493	rs525410	1	Disorders of liver	573	Systemic lupus erythematosus	1706	0.9263	0.04714
Core matrisome	ECM Glycoproteins	LAMC2	laminin, gamma 2	6493	rs525410	1	Actinic keratosis	702.1	Systemic lupus erythematosus	2505	0.9294	0.04964
Core matrisome	ECM Glycoproteins	MEPE	matrix extracellular phosphoglycoprotein	13361	rs7698623	4	Torsion dystonia	333.4	Ischemic stroke	70	2.334	8.628e-4
Core matrisome	ECM Glycoproteins	MEPE	matrix extracellular phosphoglycoprotein	13361	rs7698623	4	Diseases of sebaceous glands	706	Ischemic stroke	2019	0.7628	0.00144
Core matrisome	ECM Glycoproteins	MEPE	matrix extracellular phosphoglycoprotein	13361	rs1471403	4 88775243	Convulsions	345.3	Bone mineral density (hip), Bone mineral density	461	0.7889	0.001465
Core matrisome	ECM Glycoproteins	MEPE	matrix extracellular phosphoglycoprotein	13361	rs7698623	4	Paget's disease of bone	731.1	Ischemic stroke	27	3.328	0.001607
Core matrisome	ECM Glycoproteins	MEPE	matrix extracellular phosphoglycoprotein	13361	rs1471403	4 88775243	Decreased libido	302.1	Bone mineral density (hip), Bone mineral density	34	2.133	0.001962
Core matrisome	ECM Glycoproteins	MEPE	matrix extracellular phosphoglycoprotein	13361	rs7698623	4	Abnormal reflex	350.5	Ischemic stroke	26	3.213	0.002709
Core matrisome	ECM Glycoproteins	MEPE	matrix extracellular phosphoglycoprotein	13361	rs7698623	4	Complication of internal orthopedic device	858	Ischemic stroke	373	0.5407	0.002769
Core matrisome	ECM Glycoproteins	MEPE	matrix extracellular phosphoglycoprotein	13361	rs7698623	4	Corns and callosities	700	Ischemic stroke	859	0.6832	0.003081
Core matrisome	ECM Glycoproteins	MEPE	matrix extracellular phosphoglycoprotein	13361	rs1471403	4 88775243	Carcinoma in situ of skin	172.3	Bone mineral density (hip), Bone mineral density	325	0.7673	0.00324
Core matrisome	ECM Glycoproteins	MEPE	matrix extracellular phosphoglycoprotein	13361	rs1471403	4 88775243	Pathologic fracture of vertebrae	743.21	Bone mineral density (hip), Bone mineral density	331	0.7731	0.004155
Core matrisome	ECM Glycoproteins	MEPE	matrix extracellular phosphoglycoprotein	13361	rs1471403	4 88775243	Epilepsy, recurrent seizures, convulsions	345	Bone mineral density (hip), Bone mineral density	512	0.8173	0.004168
Core matrisome	ECM Glycoproteins	MEPE	matrix extracellular phosphoglycoprotein	13361	rs1471403	4 88775243	Chronic cystitis	592.12	Bone mineral density (hip), Bone mineral density	95	1.544	0.004328
Core matrisome	ECM Glycoproteins	MEPE	matrix extracellular phosphoglycoprotein	13361	rs7698623	4	Peripheral retinal degenerations	362.6	Ischemic stroke	254	0.4943	0.004607
Core matrisome	ECM Glycoproteins	MEPE	matrix extracellular phosphoglycoprotein	13361	rs1471403	4 88775243	Fracture of humerus	803.1	Bone mineral density (hip), Bone mineral density	331	0.7769	0.004748
Core matrisome	ECM Glycoproteins	MEPE	matrix extracellular phosphoglycoprotein	13361	rs1471403	4 88775243	Supraventricular premature beats	427.61	Bone mineral density (hip), Bone mineral density	207	0.7078	0.004753
Core matrisome	ECM Glycoproteins	MEPE	matrix extracellular phosphoglycoprotein	13361	rs7698623	4	Diseases of respiratory system	519	Ischemic stroke	716	1.341	0.005014
Core matrisome	ECM Glycoproteins	MEPE	matrix extracellular phosphoglycoprotein	13361	rs1471403	4 88775243	Sexual and gender identity disorders	302	Bone mineral density (hip), Bone mineral density	163	1.388	0.006037
Core matrisome	ECM Glycoproteins	MEPE	matrix extracellular phosphoglycoprotein	13361	rs7698623	4	Coma; stupor; and brain damage	348.1	Ischemic stroke	765	1.337	0.006365
Core matrisome	ECM Glycoproteins	MEPE	matrix extracellular phosphoglycoprotein	13361	rs1471403	4 88775243	Pathologic fracture	743.2	Bone mineral density (hip), Bone mineral density	517	0.8228	0.007176
Core matrisome	ECM Glycoproteins	MEPE	matrix extracellular phosphoglycoprotein	13361	rs7698623	4	Posterior pituitary disorders	253.3	Ischemic stroke	53	2.221	0.007523
Core matrisome	ECM Glycoproteins	MEPE	matrix extracellular phosphoglycoprotein	13361	rs1471403	4 88775243	Mycoses	117	Bone mineral density (hip), Bone mineral density	80	1.526	0.008796
Core matrisome	ECM Glycoproteins	MEPE	matrix extracellular phosphoglycoprotein	13361	rs1471403	4 88775243	Spontaneous ecchymoses	287.1	Bone mineral density (hip), Bone mineral density	70	1.582	0.009515
Core matrisome	ECM Glycoproteins	MEPE	matrix extracellular phosphoglycoprotein	13361	rs1471403	4 88775243	Pneumococcal pneumonia	480.11	Bone mineral density (hip), Bone mineral density	42	1.785	0.009619
Core matrisome	ECM Glycoproteins	MEPE	matrix extracellular phosphoglycoprotein	13361	rs1471403	4 88775243	Dysuria	599.3	Bone mineral density (hip), Bone mineral density	914	1.156	0.01014
Core matrisome	ECM Glycoproteins	MEPE	matrix extracellular phosphoglycoprotein	13361	rs1471403	4 88775243	Salicylates causing adverse effects in therapeutic use	965.3	Bone mineral density (hip), Bone mineral density	38	1.834	0.01019
Core matrisome	ECM Glycoproteins	MEPE	matrix extracellular phosphoglycoprotein	13361	rs1471403	4 88775243	Protein plasma/amino-acid transport and metabolism disorder	270	Bone mineral density (hip), Bone mineral density	278	1.256	0.01025
Core matrisome	ECM Glycoproteins	MEPE	matrix extracellular phosphoglycoprotein	13361	rs1471403	4 88775243	Adverse effects of antilipemic and antiarteriosclerotic drugs	972.2	Bone mineral density (hip), Bone mineral density	28	2.043	0.01079
Core matrisome	ECM Glycoproteins	MEPE	matrix extracellular phosphoglycoprotein	13361	rs1471403	4 88775243	Genital prolapse	618	Bone mineral density (hip), Bone mineral density	718	1.161	0.01225
Core matrisome	ECM Glycoproteins	MEPE	matrix extracellular phosphoglycoprotein	13361	rs7698623	4	Acquired foot deformities	735	Ischemic stroke	1618	0.7877	0.01235
Core matrisome	ECM Glycoproteins	MEPE	matrix extracellular phosphoglycoprotein	13361	rs7698623	4	Dermatomyositis and Polymyositis	709.4	Ischemic stroke	29	2.598	0.01245
Core matrisome	ECM Glycoproteins	MEPE	matrix extracellular phosphoglycoprotein	13361	rs7698623	4	Diffuse diseases of connective tissue	709	Ischemic stroke	288	1.495	0.0125
Core matrisome	ECM Glycoproteins	MEPE	matrix extracellular phosphoglycoprotein	13361	rs7698623	4	Adverse effects of antilipemic and antiarteriosclerotic drugs	972.2	Ischemic stroke	28	2.702	0.01345
Core matrisome	ECM Glycoproteins	MEPE	matrix extracellular phosphoglycoprotein	13361	rs7698623	4	Mixed hyperlipidemia	272.13	Ischemic stroke	771	0.7145	0.01362
Core matrisome	ECM Glycoproteins	MEPE	matrix extracellular phosphoglycoprotein	13361	rs7698623	4	Muscle weakness	772.3	Ischemic stroke	227	1.523	0.01408
Core matrisome	ECM Glycoproteins	MEPE	matrix extracellular phosphoglycoprotein	13361	rs7698623	4	Macular degeneration, dry	362.21	Ischemic stroke	827	0.661	0.01449
Core matrisome	ECM Glycoproteins	MEPE	matrix extracellular phosphoglycoprotein	13361	rs7698623	4	Deficiency anemias NOS	281.9	Ischemic stroke	129	1.689	0.01493
Core matrisome	ECM Glycoproteins	MEPE	matrix extracellular phosphoglycoprotein	13361	rs7698623	4	Acquired hemolytic anemias	283	Ischemic stroke	34	2.403	0.01513
Core matrisome	ECM Glycoproteins	MEPE	matrix extracellular phosphoglycoprotein	13361	rs1471403	4 88775243	Calcaneal spur; Exostosis NOS	726.4	Bone mineral density (hip), Bone mineral density	383	0.8011	0.01561
Core matrisome	ECM Glycoproteins	MEPE	matrix extracellular phosphoglycoprotein	13361	rs7698623	4	Retinal vascular changes and abnomalities	362.4	Ischemic stroke	496	0.6661	0.01564
Core matrisome	ECM Glycoproteins	MEPE	matrix extracellular phosphoglycoprotein	13361	rs1471403	4 88775243	Skin cancer	172	Bone mineral density (hip), Bone mineral density	2161	0.9141	0.01571
Core matrisome	ECM Glycoproteins	MEPE	matrix extracellular phosphoglycoprotein	13361	rs7698623	4	Cystoid macular degeneration of retina	362.23	Ischemic stroke	254	0.5636	0.01586
Core matrisome	ECM Glycoproteins	MEPE	matrix extracellular phosphoglycoprotein	13361	rs7698623	4	Sebaceous cyst	706.2	Ischemic stroke	1223	0.7809	0.01675
Core matrisome	ECM Glycoproteins	MEPE	matrix extracellular phosphoglycoprotein	13361	rs7698623	4	Impetigo	686.2	Ischemic stroke	81	1.898	0.01754
Core matrisome	ECM Glycoproteins	MEPE	matrix extracellular phosphoglycoprotein	13361	rs7698623	4	Hallux valgus (Bunion)	735.3	Ischemic stroke	667	0.7041	0.01805
Core matrisome	ECM Glycoproteins	MEPE	matrix extracellular phosphoglycoprotein	13361	rs1471403	4 88775243	Fracture of upper limb	803	Bone mineral density (hip), Bone mineral density	1015	0.8827	0.01816
Core matrisome	ECM Glycoproteins	MEPE	matrix extracellular phosphoglycoprotein	13361	rs1471403	4 88775243	Mastodynia	613.5	Bone mineral density (hip), Bone mineral density	311	1.24	0.01824
Core matrisome	ECM Glycoproteins	MEPE	matrix extracellular phosphoglycoprotein	13361	rs1471403	4 88775243	Cirrhosis of liver without mention of alcohol	571.51	Bone mineral density (hip), Bone mineral density	120	0.7062	0.01855
Core matrisome	ECM Glycoproteins	MEPE	matrix extracellular phosphoglycoprotein	13361	rs1471403	4 88775243	Microscopic hematuria	593.2	Bone mineral density (hip), Bone mineral density	93	1.446	0.01869
Core matrisome	ECM Glycoproteins	MEPE	matrix extracellular phosphoglycoprotein	13361	rs1471403	4 88775243	Urinary obstruction	599.1	Bone mineral density (hip), Bone mineral density	149	1.346	0.01959
Core matrisome	ECM Glycoproteins	MEPE	matrix extracellular phosphoglycoprotein	13361	rs1471403	4 88775243	Primary pulmonary hypertension	415.2	Bone mineral density (hip), Bone mineral density	74	1.48	0.01961
Core matrisome	ECM Glycoproteins	MEPE	matrix extracellular phosphoglycoprotein	13361	rs1471403	4 88775243	Plasma protein metabolism disorder	270.3	Bone mineral density (hip), Bone mineral density	227	1.257	0.01991
Core matrisome	ECM Glycoproteins	MEPE	matrix extracellular phosphoglycoprotein	13361	rs7698623	4	Mental disorders due to brain damage	291.4	Ischemic stroke	435	1.413	0.02004
Core matrisome	ECM Glycoproteins	MEPE	matrix extracellular phosphoglycoprotein	13361	rs7698623	4	Hypercalcemia	275.6	Ischemic stroke	300	1.43	0.02134
Core matrisome	ECM Glycoproteins	MEPE	matrix extracellular phosphoglycoprotein	13361	rs1471403	4 88775243	Prolapse of vaginal vault after hysterectomy	618.5	Bone mineral density (hip), Bone mineral density	102	1.394	0.02243
Core matrisome	ECM Glycoproteins	MEPE	matrix extracellular phosphoglycoprotein	13361	rs1471403	4 88775243	Psoriatic arthropathy	696.42	Bone mineral density (hip), Bone mineral density	42	1.656	0.0228
Core matrisome	ECM Glycoproteins	MEPE	matrix extracellular phosphoglycoprotein	13361	rs1471403	4 88775243	Paraproteinemia	270.32	Bone mineral density (hip), Bone mineral density	152	1.309	0.0236
Core matrisome	ECM Glycoproteins	MEPE	matrix extracellular phosphoglycoprotein	13361	rs1471403	4 88775243	Other dermatoses	702	Bone mineral density (hip), Bone mineral density	4203	0.9251	0.02361
Core matrisome	ECM Glycoproteins	MEPE	matrix extracellular phosphoglycoprotein	13361	rs7698623	4	Hypoparathyroidism	252.2	Ischemic stroke	27	2.5	0.02365
Core matrisome	ECM Glycoproteins	MEPE	matrix extracellular phosphoglycoprotein	13361	rs7698623	4	Biliary cirrhosis	571.6	Ischemic stroke	26	2.501	0.02384
Core matrisome	ECM Glycoproteins	MEPE	matrix extracellular phosphoglycoprotein	13361	rs7698623	4	Diseases of the larynx and vocal cords	473	Ischemic stroke	659	1.305	0.02411
Core matrisome	ECM Glycoproteins	MEPE	matrix extracellular phosphoglycoprotein	13361	rs1471403	4 88775243	Ulceration of the lower GI tract	556	Bone mineral density (hip), Bone mineral density	82	0.6618	0.02446
Core matrisome	ECM Glycoproteins	MEPE	matrix extracellular phosphoglycoprotein	13361	rs1471403	4 88775243	Ankylosis of joint	741.1	Bone mineral density (hip), Bone mineral density	127	0.7246	0.02468
Core matrisome	ECM Glycoproteins	MEPE	matrix extracellular phosphoglycoprotein	13361	rs1471403	4 88775243	Actinic keratosis	702.1	Bone mineral density (hip), Bone mineral density	2505	0.915	0.02476
Core matrisome	ECM Glycoproteins	MEPE	matrix extracellular phosphoglycoprotein	13361	rs1471403	4 88775243	Acute laryngitis and tracheitis	465.4	Bone mineral density (hip), Bone mineral density	117	0.7012	0.02483
Core matrisome	ECM Glycoproteins	MEPE	matrix extracellular phosphoglycoprotein	13361	rs1471403	4 88775243	Pityriasis	696.3	Bone mineral density (hip), Bone mineral density	26	0.449	0.025
Core matrisome	ECM Glycoproteins	MEPE	matrix extracellular phosphoglycoprotein	13361	rs7698623	4	Other disorders of bone and cartilage	733	Ischemic stroke	427	0.672	0.02517
Core matrisome	ECM Glycoproteins	MEPE	matrix extracellular phosphoglycoprotein	13361	rs7698623	4	Loss of teeth or edentulism	525.1	Ischemic stroke	163	0.484	0.02532
Core matrisome	ECM Glycoproteins	MEPE	matrix extracellular phosphoglycoprotein	13361	rs1471403	4 88775243	Respiratory insufficiency	509.2	Bone mineral density (hip), Bone mineral density	236	1.243	0.02534
Core matrisome	ECM Glycoproteins	MEPE	matrix extracellular phosphoglycoprotein	13361	rs1471403	4 88775243	Osteoarthritis; localized	740.1	Bone mineral density (hip), Bone mineral density	1645	0.9049	0.02561
Core matrisome	ECM Glycoproteins	MEPE	matrix extracellular phosphoglycoprotein	13361	rs1471403	4 88775243	Prostatitis	601.1	Bone mineral density (hip), Bone mineral density	316	0.7994	0.02574
Core matrisome	ECM Glycoproteins	MEPE	matrix extracellular phosphoglycoprotein	13361	rs1471403	4 88775243	Other derangement of joint	742.9	Bone mineral density (hip), Bone mineral density	249	1.232	0.0265
Core matrisome	ECM Glycoproteins	MEPE	matrix extracellular phosphoglycoprotein	13361	rs7698623	4	Macular degeneration	362.2	Ischemic stroke	2304	0.8112	0.02691
Core matrisome	ECM Glycoproteins	MEPE	matrix extracellular phosphoglycoprotein	13361	rs1471403	4 88775243	Heartburn	533	Bone mineral density (hip), Bone mineral density	160	0.7487	0.02693
Core matrisome	ECM Glycoproteins	MEPE	matrix extracellular phosphoglycoprotein	13361	rs7698623	4	Chronic laryngitis	473.1	Ischemic stroke	35	2.299	0.02701
Core matrisome	ECM Glycoproteins	MEPE	matrix extracellular phosphoglycoprotein	13361	rs1471403	4 88775243	Other disorders of stomach and duodenum	537	Bone mineral density (hip), Bone mineral density	270	1.227	0.02735
Core matrisome	ECM Glycoproteins	MEPE	matrix extracellular phosphoglycoprotein	13361	rs1471403	4 88775243	Intervertebral disc disorders	722	Bone mineral density (hip), Bone mineral density	2407	0.9216	0.02848
Core matrisome	ECM Glycoproteins	MEPE	matrix extracellular phosphoglycoprotein	13361	rs7698623	4	Cardiac pacemaker in situ	426.91	Ischemic stroke	506	1.368	0.02926
Core matrisome	ECM Glycoproteins	MEPE	matrix extracellular phosphoglycoprotein	13361	rs7698623	4	Spasm of muscle	772.2	Ischemic stroke	402	1.348	0.02955
Core matrisome	ECM Glycoproteins	MEPE	matrix extracellular phosphoglycoprotein	13361	rs1471403	4 88775243	Symptoms/disorders of the urinary system	599	Bone mineral density (hip), Bone mineral density	3821	1.073	0.02958
Core matrisome	ECM Glycoproteins	MEPE	matrix extracellular phosphoglycoprotein	13361	rs1471403	4 88775243	Viral hepatitis C	070.3	Bone mineral density (hip), Bone mineral density	96	0.6982	0.02966
Core matrisome	ECM Glycoproteins	MEPE	matrix extracellular phosphoglycoprotein	13361	rs1471403	4 88775243	Retinal detachment with retinal defect	361.1	Bone mineral density (hip), Bone mineral density	148	0.7473	0.02989
Core matrisome	ECM Glycoproteins	MEPE	matrix extracellular phosphoglycoprotein	13361	rs1471403	4 88775243	History of diseases of digestive system	564.9	Bone mineral density (hip), Bone mineral density	56	1.527	0.03013
Core matrisome	ECM Glycoproteins	MEPE	matrix extracellular phosphoglycoprotein	13361	rs1471403	4 88775243	Seborrheic keratosis	702.2	Bone mineral density (hip), Bone mineral density	2570	0.9207	0.03016
Core matrisome	ECM Glycoproteins	MEPE	matrix extracellular phosphoglycoprotein	13361	rs7698623	4	Pruritus and related conditions	698	Ischemic stroke	502	1.315	0.03089
Core matrisome	ECM Glycoproteins	MEPE	matrix extracellular phosphoglycoprotein	13361	rs1471403	4 88775243	Scar conditions and fibrosis of skin	702.3	Bone mineral density (hip), Bone mineral density	235	0.7972	0.03117
Core matrisome	ECM Glycoproteins	MEPE	matrix extracellular phosphoglycoprotein	13361	rs7698623	4	Other specified nonpsychotic and/or transient mental disorders	291	Ischemic stroke	450	1.369	0.03139
Core matrisome	ECM Glycoproteins	MEPE	matrix extracellular phosphoglycoprotein	13361	rs1471403	4 88775243	Benign neoplasm of respiratory and intrathoracic organs	212	Bone mineral density (hip), Bone mineral density	49	0.5991	0.03224
Core matrisome	ECM Glycoproteins	MEPE	matrix extracellular phosphoglycoprotein	13361	rs7698623	4	Cachexia	260.1	Ischemic stroke	32	2.293	0.03233
Core matrisome	ECM Glycoproteins	MEPE	matrix extracellular phosphoglycoprotein	13361	rs1471403	4 88775243	Fracture of unspecified bones	809	Bone mineral density (hip), Bone mineral density	842	0.8868	0.03331
Core matrisome	ECM Glycoproteins	MEPE	matrix extracellular phosphoglycoprotein	13361	rs7698623	4	Eustachian tube disorders	381.2	Ischemic stroke	321	0.6438	0.03387
Core matrisome	ECM Glycoproteins	MEPE	matrix extracellular phosphoglycoprotein	13361	rs7698623	4	Secondary malignancy of bone	198.6	Ischemic stroke	186	1.49	0.034
Core matrisome	ECM Glycoproteins	MEPE	matrix extracellular phosphoglycoprotein	13361	rs7698623	4	Tinnitus	389.4	Ischemic stroke	499	0.6979	0.03413
Core matrisome	ECM Glycoproteins	MEPE	matrix extracellular phosphoglycoprotein	13361	rs7698623	4	Retinal disorders	362	Ischemic stroke	3146	0.8408	0.03416
Core matrisome	ECM Glycoproteins	MEPE	matrix extracellular phosphoglycoprotein	13361	rs7698623	4	Adverse effects of opiates and related narcotics in therapeutic use	965.1	Ischemic stroke	250	1.466	0.03438
Core matrisome	ECM Glycoproteins	MEPE	matrix extracellular phosphoglycoprotein	13361	rs7698623	4	Other diseases of respiratory system	519.8	Ischemic stroke	151	1.566	0.03516
Core matrisome	ECM Glycoproteins	MEPE	matrix extracellular phosphoglycoprotein	13361	rs1471403	4 88775243	Chronic airway obstruction	496	Bone mineral density (hip), Bone mineral density	1807	0.9173	0.03673
Core matrisome	ECM Glycoproteins	MEPE	matrix extracellular phosphoglycoprotein	13361	rs1471403	4 88775243	Chronic glomerulonephritis	580.14	Bone mineral density (hip), Bone mineral density	26	1.79	0.03735
Core matrisome	ECM Glycoproteins	MEPE	matrix extracellular phosphoglycoprotein	13361	rs1471403	4 88775243	Urethral stricture (not specified as infectious)	597.1	Bone mineral density (hip), Bone mineral density	124	1.313	0.03876
Core matrisome	ECM Glycoproteins	MEPE	matrix extracellular phosphoglycoprotein	13361	rs1471403	4 88775243	Mild cognitive impairment	292.2	Bone mineral density (hip), Bone mineral density	59	1.475	0.03887
Core matrisome	ECM Glycoproteins	MEPE	matrix extracellular phosphoglycoprotein	13361	rs1471403	4 88775243	Age-related macular degeneration	362.29	Bone mineral density (hip), Bone mineral density	749	0.8632	0.0389
Core matrisome	ECM Glycoproteins	MEPE	matrix extracellular phosphoglycoprotein	13361	rs7698623	4	Dysphagia	532	Ischemic stroke	1442	1.197	0.03957
Core matrisome	ECM Glycoproteins	MEPE	matrix extracellular phosphoglycoprotein	13361	rs1471403	4 88775243	Chronic venous hypertension	453	Bone mineral density (hip), Bone mineral density	31	0.5194	0.04018
Core matrisome	ECM Glycoproteins	MEPE	matrix extracellular phosphoglycoprotein	13361	rs7698623	4	Toxic erythema	695.1	Ischemic stroke	28	2.282	0.04022
Core matrisome	ECM Glycoproteins	MEPE	matrix extracellular phosphoglycoprotein	13361	rs7698623	4	Age-related macular degeneration	362.29	Ischemic stroke	749	0.7436	0.04046
Core matrisome	ECM Glycoproteins	MEPE	matrix extracellular phosphoglycoprotein	13361	rs7698623	4	Occlusion of cerebral arteries	433.2	Ischemic stroke	565	1.289	0.04061
Core matrisome	ECM Glycoproteins	MEPE	matrix extracellular phosphoglycoprotein	13361	rs7698623	4	Herpes zoster with nervous system complications	053.1	Ischemic stroke	89	0.355	0.04163
Core matrisome	ECM Glycoproteins	MEPE	matrix extracellular phosphoglycoprotein	13361	rs1471403	4 88775243	Glaucoma	365	Bone mineral density (hip), Bone mineral density	2586	0.9177	0.04173
Core matrisome	ECM Glycoproteins	MEPE	matrix extracellular phosphoglycoprotein	13361	rs1471403	4 88775243	Localized superficial swelling, mass, or lump	687.2	Bone mineral density (hip), Bone mineral density	306	1.199	0.04207
Core matrisome	ECM Glycoproteins	MEPE	matrix extracellular phosphoglycoprotein	13361	rs1471403	4 88775243	Other conditions of brain	348	Bone mineral density (hip), Bone mineral density	205	0.7988	0.04215
Core matrisome	ECM Glycoproteins	MEPE	matrix extracellular phosphoglycoprotein	13361	rs7698623	4	Other upper respiratory disease	479	Ischemic stroke	1057	1.247	0.04287
Core matrisome	ECM Glycoproteins	MEPE	matrix extracellular phosphoglycoprotein	13361	rs1471403	4 88775243	Non-melanoma skin cancer	172.2	Bone mineral density (hip), Bone mineral density	1931	0.9243	0.04401
Core matrisome	ECM Glycoproteins	MEPE	matrix extracellular phosphoglycoprotein	13361	rs1471403	4 88775243	Derangement of joint, non-traumatic	742	Bone mineral density (hip), Bone mineral density	334	1.179	0.04518
Core matrisome	ECM Glycoproteins	MEPE	matrix extracellular phosphoglycoprotein	13361	rs1471403	4 88775243	Benign neoplasm of bone and articular cartilage	213	Bone mineral density (hip), Bone mineral density	54	0.6379	0.04656
Core matrisome	ECM Glycoproteins	MEPE	matrix extracellular phosphoglycoprotein	13361	rs1471403	4 88775243	Inguinal hernia	550.1	Bone mineral density (hip), Bone mineral density	983	0.8942	0.04701
Core matrisome	ECM Glycoproteins	MEPE	matrix extracellular phosphoglycoprotein	13361	rs7698623	4	Candidiasis	112	Ischemic stroke	570	1.275	0.04711
Core matrisome	ECM Glycoproteins	MEPE	matrix extracellular phosphoglycoprotein	13361	rs1471403	4 88775243	Hereditary hemolytic anemias	282	Bone mineral density (hip), Bone mineral density	59	1.458	0.04725
Core matrisome	ECM Glycoproteins	MEPE	matrix extracellular phosphoglycoprotein	13361	rs7698623	4	Flat foot	735.1	Ischemic stroke	286	0.6334	0.0476
Core matrisome	ECM Glycoproteins	MEPE	matrix extracellular phosphoglycoprotein	13361	rs1471403	4 88775243	Other paralytic syndromes	344	Bone mineral density (hip), Bone mineral density	97	0.7251	0.04775
Core matrisome	ECM Glycoproteins	MEPE	matrix extracellular phosphoglycoprotein	13361	rs7698623	4	Late effects of cerebrovascular disease	433.8	Ischemic stroke	675	1.259	0.04787
Core matrisome	ECM Glycoproteins	MEPE	matrix extracellular phosphoglycoprotein	13361	rs7698623	4	Ischemic stroke	433.21	Ischemic stroke	510	1.293	0.04803
Core matrisome	ECM Glycoproteins	MEPE	matrix extracellular phosphoglycoprotein	13361	rs7698623	4	Malaise and fatigue	798	Ischemic stroke	4014	1.132	0.04834
Core matrisome	ECM Glycoproteins	MEPE	matrix extracellular phosphoglycoprotein	13361	rs1471403	4 88775243	Anisometropia	368.3	Bone mineral density (hip), Bone mineral density	221	0.8107	0.04838
Core matrisome	ECM Glycoproteins	MEPE	matrix extracellular phosphoglycoprotein	13361	rs7698623	4	Disorders of cervical region	723	Ischemic stroke	182	1.473	0.04859
Core matrisome	ECM Glycoproteins	MEPE	matrix extracellular phosphoglycoprotein	13361	rs1471403	4 88775243	Other disorders of peritoneum	568	Bone mineral density (hip), Bone mineral density	113	1.313	0.04872
Core matrisome	ECM Glycoproteins	MEPE	matrix extracellular phosphoglycoprotein	13361	rs7698623	4	Psychogenic disorder	303.3	Ischemic stroke	127	0.4664	0.04891
Core matrisome	ECM Glycoproteins	MEPE	matrix extracellular phosphoglycoprotein	13361	rs1471403	4 88775243	Encounter for long-term use of antiplatelets/antithrombotics	457.2	Bone mineral density (hip), Bone mineral density	30	1.691	0.04996
Core matrisome	ECM Glycoproteins	MMRN1	multimerin 1	7178	rs6532197	4 90797301	Balanoposthitis	601.4	Parkinson's disease	67	2.723	9.007e-4
Core matrisome	ECM Glycoproteins	MMRN1	multimerin 1	7178	rs6532197	4 90797301	Polyarteritis nodosa and allied conditions	446	Parkinson's disease	184	0.378	0.002564
Core matrisome	ECM Glycoproteins	MMRN1	multimerin 1	7178	rs6532197	4 90797301	Osteochondropathies	732	Parkinson's disease	38	2.64	0.002906
Core matrisome	ECM Glycoproteins	MMRN1	multimerin 1	7178	rs6532197	4 90797301	Disorders of adrenal glands	255	Parkinson's disease	193	0.4185	0.003083
Core matrisome	ECM Glycoproteins	MMRN1	multimerin 1	7178	rs6532197	4 90797301	Dementias	290.1	Parkinson's disease	1170	0.7261	0.003195
Core matrisome	ECM Glycoproteins	MMRN1	multimerin 1	7178	rs6532197	4 90797301	Multiple sclerosis	335	Parkinson's disease	83	1.972	0.003831
Core matrisome	ECM Glycoproteins	MMRN1	multimerin 1	7178	rs6532197	4 90797301	Elevated prostate specific antigen	796	Parkinson's disease	840	1.414	0.004156
Core matrisome	ECM Glycoproteins	MMRN1	multimerin 1	7178	rs6532197	4 90797301	AV block	426.2	Parkinson's disease	759	0.6769	0.004354
Core matrisome	ECM Glycoproteins	MMRN1	multimerin 1	7178	rs6532197	4 90797301	Stress fracture	743.4	Parkinson's disease	40	2.425	0.0048
Core matrisome	ECM Glycoproteins	MMRN1	multimerin 1	7178	rs6532197	4 90797301	Renal failure	585	Parkinson's disease	2061	0.8126	0.00655
Core matrisome	ECM Glycoproteins	MMRN1	multimerin 1	7178	rs6532197	4 90797301	Esophageal atresia/tracheoesophageal fistula	750.11	Parkinson's disease	54	2.139	0.006616
Core matrisome	ECM Glycoproteins	MMRN1	multimerin 1	7178	rs6532197	4 90797301	Diseases of blood and blood-forming organs	289	Parkinson's disease	363	1.434	0.007324
Core matrisome	ECM Glycoproteins	MMRN1	multimerin 1	7178	rs6532197	4 90797301	Disorders of liver	573	Parkinson's disease	1706	0.8075	0.007608
Core matrisome	ECM Glycoproteins	MMRN1	multimerin 1	7178	rs6532197	4 90797301	Alzheimer's disease	290.11	Parkinson's disease	737	0.7075	0.008091
Core matrisome	ECM Glycoproteins	MMRN1	multimerin 1	7178	rs6532197	4 90797301	Atherosclerosis of aorta	440.9	Parkinson's disease	312	0.5645	0.008485
Core matrisome	ECM Glycoproteins	MMRN1	multimerin 1	7178	rs6532197	4 90797301	Keratitis	370	Parkinson's disease	243	1.552	0.009337
Core matrisome	ECM Glycoproteins	MMRN1	multimerin 1	7178	rs6532197	4 90797301	Abnormal serum enzyme levels	573.9	Parkinson's disease	999	0.7615	0.0109
Core matrisome	ECM Glycoproteins	MMRN1	multimerin 1	7178	rs6532197	4 90797301	Chronic renal failure	585.3	Parkinson's disease	1544	0.8015	0.01111
Core matrisome	ECM Glycoproteins	MMRN1	multimerin 1	7178	rs6532197	4 90797301	Cardiac dysrhythmias	427	Parkinson's disease	5116	0.8653	0.01315
Core matrisome	ECM Glycoproteins	MMRN1	multimerin 1	7178	rs6532197	4 90797301	Esophageal bleeding	530.2	Parkinson's disease	56	1.99	0.01395
Core matrisome	ECM Glycoproteins	MMRN1	multimerin 1	7178	rs6532197	4 90797301	Nausea and vomiting	789	Parkinson's disease	1851	0.8321	0.01486
Core matrisome	ECM Glycoproteins	MMRN1	multimerin 1	7178	rs6532197	4 90797301	Redundant prepuce and phimosis/BXO	604.1	Parkinson's disease	70	2.253	0.01508
Core matrisome	ECM Glycoproteins	MMRN1	multimerin 1	7178	rs6532197	4 90797301	Gingival and periodontal diseases	523	Parkinson's disease	548	0.7065	0.01643
Core matrisome	ECM Glycoproteins	MMRN1	multimerin 1	7178	rs6532197	4 90797301	Tobacco use disorder	318	Parkinson's disease	1902	0.8379	0.01685
Core matrisome	ECM Glycoproteins	MMRN1	multimerin 1	7178	rs6532197	4 90797301	Hyposmolality and/or hyponatremia	276.12	Parkinson's disease	703	0.7425	0.01694
Core matrisome	ECM Glycoproteins	MMRN1	multimerin 1	7178	rs6532197	4 90797301	Pneumonia	480	Parkinson's disease	2367	0.8384	0.01805
Core matrisome	ECM Glycoproteins	MMRN1	multimerin 1	7178	rs6532197	4 90797301	Arteritis NOS	446.9	Parkinson's disease	74	0.1859	0.0182
Core matrisome	ECM Glycoproteins	MMRN1	multimerin 1	7178	rs6532197	4 90797301	Heart failure NOS	428.2	Parkinson's disease	268	0.6028	0.01826
Core matrisome	ECM Glycoproteins	MMRN1	multimerin 1	7178	rs6532197	4 90797301	Acid-base balance disorder	276.4	Parkinson's disease	215	0.5642	0.01831
Core matrisome	ECM Glycoproteins	MMRN1	multimerin 1	7178	rs6532197	4 90797301	Osteoarthrosis	740	Parkinson's disease	5272	0.87	0.01888
Core matrisome	ECM Glycoproteins	MMRN1	multimerin 1	7178	rs6532197	4 90797301	Adverse effects of opiates and related narcotics in therapeutic use	965.1	Parkinson's disease	250	0.5811	0.01919
Core matrisome	ECM Glycoproteins	MMRN1	multimerin 1	7178	rs6532197	4 90797301	First degree AV block	426.21	Parkinson's disease	476	0.6803	0.01982
Core matrisome	ECM Glycoproteins	MMRN1	multimerin 1	7178	rs6532197	4 90797301	Vaginal enterocele, congenital or acquired	618.6	Parkinson's disease	96	0.3473	0.02038
Core matrisome	ECM Glycoproteins	MMRN1	multimerin 1	7178	rs6532197	4 90797301	Cardiac pacemaker/device in situ	426.9	Parkinson's disease	576	0.7132	0.02086
Core matrisome	ECM Glycoproteins	MMRN1	multimerin 1	7178	rs6532197	4 90797301	Acute renal failure	585.1	Parkinson's disease	797	0.763	0.02134
Core matrisome	ECM Glycoproteins	MMRN1	multimerin 1	7178	rs6532197	4 90797301	Giant cell arteritis	446.5	Parkinson's disease	91	0.3113	0.02152
Core matrisome	ECM Glycoproteins	MMRN1	multimerin 1	7178	rs6532197	4 90797301	Sicca syndrome	709.2	Parkinson's disease	100	0.3875	0.02362
Core matrisome	ECM Glycoproteins	MMRN1	multimerin 1	7178	rs6532197	4 90797301	Vascular dementia	290.16	Parkinson's disease	162	0.5166	0.02393
Core matrisome	ECM Glycoproteins	MMRN1	multimerin 1	7178	rs6532197	4 90797301	Cardiac conduction disorders	426	Parkinson's disease	2685	0.8391	0.0241
Core matrisome	ECM Glycoproteins	MMRN1	multimerin 1	7178	rs6532197	4 90797301	Atherosclerosis of renal artery	440.1	Parkinson's disease	285	0.6036	0.02531
Core matrisome	ECM Glycoproteins	MMRN1	multimerin 1	7178	rs6532197	4 90797301	Viral hepatitis	070	Parkinson's disease	255	1.416	0.02627
Core matrisome	ECM Glycoproteins	MMRN1	multimerin 1	7178	rs6532197	4 90797301	Heart failure	428	Parkinson's disease	2044	0.8345	0.02646
Core matrisome	ECM Glycoproteins	MMRN1	multimerin 1	7178	rs6532197	4 90797301	Coronary atherosclerosis	411.4	Parkinson's disease	3499	0.8681	0.02741
Core matrisome	ECM Glycoproteins	MMRN1	multimerin 1	7178	rs6532197	4 90797301	Encounter for long-term use of anticoagulants/antithrombotics	457	Parkinson's disease	309	0.6496	0.02792
Core matrisome	ECM Glycoproteins	MMRN1	multimerin 1	7178	rs6532197	4 90797301	Chronic ischemic heart disease	411.8	Parkinson's disease	1228	0.8063	0.02879
Core matrisome	ECM Glycoproteins	MMRN1	multimerin 1	7178	rs6532197	4 90797301	Heart transplant/surgery	429.1	Parkinson's disease	118	0.4524	0.02898
Core matrisome	ECM Glycoproteins	MMRN1	multimerin 1	7178	rs6532197	4 90797301	Large cell lymphoma	202.24	Parkinson's disease	36	2.095	0.03044
Core matrisome	ECM Glycoproteins	MMRN1	multimerin 1	7178	rs6532197	4 90797301	Diffuse diseases of connective tissue	709	Parkinson's disease	288	0.6508	0.03101
Core matrisome	ECM Glycoproteins	MMRN1	multimerin 1	7178	rs6532197	4 90797301	Viral hepatitis C	070.3	Parkinson's disease	96	1.665	0.0313
Core matrisome	ECM Glycoproteins	MMRN1	multimerin 1	7178	rs6532197	4 90797301	Degeneration of intervertebral disc	722.6	Parkinson's disease	1656	0.8355	0.03204
Core matrisome	ECM Glycoproteins	MMRN1	multimerin 1	7178	rs6532197	4 90797301	Aplastic anemia	284	Parkinson's disease	172	0.5541	0.0323
Core matrisome	ECM Glycoproteins	MMRN1	multimerin 1	7178	rs6532197	4 90797301	Coagulation defects	286	Parkinson's disease	2191	0.8584	0.03655
Core matrisome	ECM Glycoproteins	MMRN1	multimerin 1	7178	rs6532197	4 90797301	Congenital anomalies of the eye	753	Parkinson's disease	365	1.348	0.03674
Core matrisome	ECM Glycoproteins	MMRN1	multimerin 1	7178	rs6532197	4 90797301	Atrial fibrillation & flutter	427.2	Parkinson's disease	2041	0.8353	0.03695
Core matrisome	ECM Glycoproteins	MMRN1	multimerin 1	7178	rs6532197	4 90797301	Renal failure NOS	585.2	Parkinson's disease	194	0.5924	0.03709
Core matrisome	ECM Glycoproteins	MMRN1	multimerin 1	7178	rs6532197	4 90797301	Second degree AV block	426.23	Parkinson's disease	96	0.4382	0.03802
Core matrisome	ECM Glycoproteins	MMRN1	multimerin 1	7178	rs6532197	4 90797301	Atrial fibrillation	427.21	Parkinson's disease	1950	0.8346	0.03932
Core matrisome	ECM Glycoproteins	MMRN1	multimerin 1	7178	rs6532197	4 90797301	Unspecified erythematous condition	695.9	Parkinson's disease	101	1.634	0.03956
Core matrisome	ECM Glycoproteins	MMRN1	multimerin 1	7178	rs6532197	4 90797301	Visual disturbances	368	Parkinson's disease	1645	1.169	0.03969
Core matrisome	ECM Glycoproteins	MMRN1	multimerin 1	7178	rs6532197	4 90797301	Shock	797	Parkinson's disease	141	0.5355	0.04327
Core matrisome	ECM Glycoproteins	MMRN1	multimerin 1	7178	rs6532197	4 90797301	Gastric ulcer	531.2	Parkinson's disease	280	0.658	0.0434
Core matrisome	ECM Glycoproteins	MMRN1	multimerin 1	7178	rs6532197	4 90797301	Polycythemia vera, secondary	289.8	Parkinson's disease	69	1.753	0.0438
Core matrisome	ECM Glycoproteins	MMRN1	multimerin 1	7178	rs6532197	4 90797301	Gingivitis	523.1	Parkinson's disease	46	0.1315	0.04413
Core matrisome	ECM Glycoproteins	MMRN1	multimerin 1	7178	rs6532197	4 90797301	Osteoarthrosis NOS	740.9	Parkinson's disease	4527	0.8802	0.04499
Core matrisome	ECM Glycoproteins	MMRN1	multimerin 1	7178	rs6532197	4 90797301	Retinal detachment with retinal defect	361.1	Parkinson's disease	148	0.5306	0.04673
Core matrisome	ECM Glycoproteins	MMRN1	multimerin 1	7178	rs6532197	4 90797301	Abnormal cytological, histological, immunological and DNA test findings	795	Parkinson's disease	44	1.907	0.04745
Core matrisome	ECM Glycoproteins	MMRN1	multimerin 1	7178	rs6532197	4 90797301	Other and unspecified disc disorder	722.9	Parkinson's disease	102	0.4638	0.04748
Core matrisome	ECM Glycoproteins	MMRN1	multimerin 1	7178	rs6532197	4 90797301	Anemia of chronic disease	285.2	Parkinson's disease	492	0.7475	0.0493
Core matrisome	ECM Glycoproteins	MMRN1	multimerin 1	7178	rs6532197	4 90797301	Displacement of intervertebral disc	722.1	Parkinson's disease	801	0.8022	0.04963
Core matrisome	ECM Glycoproteins	MMRN1	multimerin 1	7178	rs6532197	4 90797301	Congenital anomalies of intestine	750.21	Parkinson's disease	25	2.214	0.04981
Core matrisome	ECM Glycoproteins	NELL1	NEL-like 1 (chicken)	7750	rs4569005	11	Acute pancreatitis	577.1	Adverse response to lamotrigine and phenytoin	245	1.453	0.001145
Core matrisome	ECM Glycoproteins	NELL1	NEL-like 1 (chicken)	7750	rs4569005	11	Gouty arthropathy	274.11	Adverse response to lamotrigine and phenytoin	226	1.45	0.002224
Core matrisome	ECM Glycoproteins	NELL1	NEL-like 1 (chicken)	7750	rs4569005	11	Derangement of joint, non-traumatic	742	Adverse response to lamotrigine and phenytoin	334	0.6928	0.00358
Core matrisome	ECM Glycoproteins	NELL1	NEL-like 1 (chicken)	7750	rs4569005	11	Other derangement of joint	742.9	Adverse response to lamotrigine and phenytoin	249	0.65	0.003815
Core matrisome	ECM Glycoproteins	NELL1	NEL-like 1 (chicken)	7750	rs4569005	11	Myopia	367.1	Adverse response to lamotrigine and phenytoin	2716	1.19	0.003975
Core matrisome	ECM Glycoproteins	NELL1	NEL-like 1 (chicken)	7750	rs4569005	11	Superficial cellulitis and abscess	681	Adverse response to lamotrigine and phenytoin	2493	1.143	0.004497
Core matrisome	ECM Glycoproteins	NELL1	NEL-like 1 (chicken)	7750	rs4569005	11	Secondary malignant neoplasm of digestive systems	198.3	Adverse response to lamotrigine and phenytoin	92	1.638	0.006135
Core matrisome	ECM Glycoproteins	NELL1	NEL-like 1 (chicken)	7750	rs4569005	11	Diseases of pancreas	577	Adverse response to lamotrigine and phenytoin	414	1.284	0.006884
Core matrisome	ECM Glycoproteins	NELL1	NEL-like 1 (chicken)	7750	rs4569005	11	Disorders of refraction and accommodation	367	Adverse response to lamotrigine and phenytoin	6059	1.144	0.006995
Core matrisome	ECM Glycoproteins	NELL1	NEL-like 1 (chicken)	7750	rs4569005	11	Strabismus (not specified as paralytic)	378.1	Adverse response to lamotrigine and phenytoin	377	1.319	0.007988
Core matrisome	ECM Glycoproteins	NELL1	NEL-like 1 (chicken)	7750	rs4569005	11	Other nonmalignant breast conditions	613	Adverse response to lamotrigine and phenytoin	1077	0.8156	0.008289
Core matrisome	ECM Glycoproteins	NELL1	NEL-like 1 (chicken)	7750	rs4569005	11	Disorders of binocular eye movements	378	Adverse response to lamotrigine and phenytoin	524	1.27	0.008728
Core matrisome	ECM Glycoproteins	NELL1	NEL-like 1 (chicken)	7750	rs4569005	11	Congenital anomalies of face and neck	749	Adverse response to lamotrigine and phenytoin	26	2.25	0.008795
Core matrisome	ECM Glycoproteins	NELL1	NEL-like 1 (chicken)	7750	rs4569005	11	Mitral valve stenosis and/or aortic valve stenosis	394.1	Adverse response to lamotrigine and phenytoin	407	1.291	0.009053
Core matrisome	ECM Glycoproteins	NELL1	NEL-like 1 (chicken)	7750	rs4569005	11	Cholesteatoma	385.3	Adverse response to lamotrigine and phenytoin	51	1.816	0.01023
Core matrisome	ECM Glycoproteins	NELL1	NEL-like 1 (chicken)	7750	rs4569005	11	Cardiac complications, not elsewhere classified	429.9	Adverse response to lamotrigine and phenytoin	153	1.465	0.01132
Core matrisome	ECM Glycoproteins	NELL1	NEL-like 1 (chicken)	7750	rs4569005	11	Disorders of external ear	380	Adverse response to lamotrigine and phenytoin	63	1.726	0.01214
Core matrisome	ECM Glycoproteins	NELL1	NEL-like 1 (chicken)	7750	rs4569005	11	Hemorrhage NOS	459.1	Adverse response to lamotrigine and phenytoin	58	0.3959	0.0125
Core matrisome	ECM Glycoproteins	NELL1	NEL-like 1 (chicken)	7750	rs4569005	11	Dysphagia	532	Adverse response to lamotrigine and phenytoin	1442	0.8592	0.01354
Core matrisome	ECM Glycoproteins	NELL1	NEL-like 1 (chicken)	7750	rs4569005	11	Breast conditions, congenital or relating to hormones	612	Adverse response to lamotrigine and phenytoin	208	0.6751	0.0139
Core matrisome	ECM Glycoproteins	NELL1	NEL-like 1 (chicken)	7750	rs4569005	11	Barrett's esophagus	530.13	Adverse response to lamotrigine and phenytoin	153	0.6313	0.01414
Core matrisome	ECM Glycoproteins	NELL1	NEL-like 1 (chicken)	7750	rs4569005	11	Astigmatism	367.2	Adverse response to lamotrigine and phenytoin	3799	1.169	0.01459
Core matrisome	ECM Glycoproteins	NELL1	NEL-like 1 (chicken)	7750	rs4569005	11	Symptoms involving digestive system	561	Adverse response to lamotrigine and phenytoin	524	0.7715	0.01499
Core matrisome	ECM Glycoproteins	NELL1	NEL-like 1 (chicken)	7750	rs4569005	11	Hematuria	593	Adverse response to lamotrigine and phenytoin	1939	0.8706	0.01517
Core matrisome	ECM Glycoproteins	NELL1	NEL-like 1 (chicken)	7750	rs4569005	11	Diffuse diseases of connective tissue	709	Adverse response to lamotrigine and phenytoin	288	0.7202	0.01594
Core matrisome	ECM Glycoproteins	NELL1	NEL-like 1 (chicken)	7750	rs4569005	11	Symptomatic artificial menopause	627.21	Adverse response to lamotrigine and phenytoin	149	1.587	0.01609
Core matrisome	ECM Glycoproteins	NELL1	NEL-like 1 (chicken)	7750	rs4569005	11	Anticoagulants causing adverse effects	964.1	Adverse response to lamotrigine and phenytoin	63	0.4317	0.01657
Core matrisome	ECM Glycoproteins	NELL1	NEL-like 1 (chicken)	7750	rs4569005	11	Hypermetropia	367.8	Adverse response to lamotrigine and phenytoin	2420	1.17	0.01657
Core matrisome	ECM Glycoproteins	NELL1	NEL-like 1 (chicken)	7750	rs4569005	11	Gastritis and duodenitis	535	Adverse response to lamotrigine and phenytoin	1061	0.8463	0.01685
Core matrisome	ECM Glycoproteins	NELL1	NEL-like 1 (chicken)	7750	rs4569005	11	Paralytic strabismus	378.5	Adverse response to lamotrigine and phenytoin	97	1.552	0.01782
Core matrisome	ECM Glycoproteins	NELL1	NEL-like 1 (chicken)	7750	rs4569005	11	Inflammatory disease of cervix, vagina, and vulva	614.5	Adverse response to lamotrigine and phenytoin	660	1.214	0.01794
Core matrisome	ECM Glycoproteins	NELL1	NEL-like 1 (chicken)	7750	rs4569005	11	Cellulitis and abscess of arm	681.3	Adverse response to lamotrigine and phenytoin	326	1.287	0.0182
Core matrisome	ECM Glycoproteins	NELL1	NEL-like 1 (chicken)	7750	rs4569005	11	Poisoning by agents primarily affecting blood constituents	964	Adverse response to lamotrigine and phenytoin	71	0.4718	0.01826
Core matrisome	ECM Glycoproteins	NELL1	NEL-like 1 (chicken)	7750	rs4569005	11	Ankylosis of joint	741.1	Adverse response to lamotrigine and phenytoin	127	1.46	0.0188
Core matrisome	ECM Glycoproteins	NELL1	NEL-like 1 (chicken)	7750	rs4569005	11	Reflux esophagitis	530.14	Adverse response to lamotrigine and phenytoin	459	0.7871	0.01984
Core matrisome	ECM Glycoproteins	NELL1	NEL-like 1 (chicken)	7750	rs4569005	11	Pancreatic cancer	157	Adverse response to lamotrigine and phenytoin	85	1.551	0.021
Core matrisome	ECM Glycoproteins	NELL1	NEL-like 1 (chicken)	7750	rs4569005	11	Abnormality of red blood cells	289.9	Adverse response to lamotrigine and phenytoin	33	1.927	0.02131
Core matrisome	ECM Glycoproteins	NELL1	NEL-like 1 (chicken)	7750	rs4569005	11	Cervicitis and endocervicitis	614.51	Adverse response to lamotrigine and phenytoin	72	1.624	0.02164
Core matrisome	ECM Glycoproteins	NELL1	NEL-like 1 (chicken)	7750	rs4569005	11	Nasal polyps	471	Adverse response to lamotrigine and phenytoin	196	1.366	0.02168
Core matrisome	ECM Glycoproteins	NELL1	NEL-like 1 (chicken)	7750	rs4569005	11	Acquired toe deformities	735.2	Adverse response to lamotrigine and phenytoin	758	0.8266	0.02235
Core matrisome	ECM Glycoproteins	NELL1	NEL-like 1 (chicken)	7750	rs4569005	11	Memory loss	292.3	Adverse response to lamotrigine and phenytoin	381	0.7657	0.02256
Core matrisome	ECM Glycoproteins	NELL1	NEL-like 1 (chicken)	7750	rs4569005	11	Photodermatitis & sunburn	938	Adverse response to lamotrigine and phenytoin	747	1.2	0.02392
Core matrisome	ECM Glycoproteins	NELL1	NEL-like 1 (chicken)	7750	rs4569005	11	Unspecified monoarthritis	716.2	Adverse response to lamotrigine and phenytoin	64	0.4869	0.02404
Core matrisome	ECM Glycoproteins	NELL1	NEL-like 1 (chicken)	7750	rs4569005	11	Inflammatory diseases of female pelvic organs	614	Adverse response to lamotrigine and phenytoin	754	1.191	0.02505
Core matrisome	ECM Glycoproteins	NELL1	NEL-like 1 (chicken)	7750	rs4569005	11	Disorders of lacrimal system	375	Adverse response to lamotrigine and phenytoin	1752	1.149	0.02617
Core matrisome	ECM Glycoproteins	NELL1	NEL-like 1 (chicken)	7750	rs4569005	11	Ulcer of esophagus	530.12	Adverse response to lamotrigine and phenytoin	126	0.6356	0.02659
Core matrisome	ECM Glycoproteins	NELL1	NEL-like 1 (chicken)	7750	rs4569005	11	Mastodynia	613.5	Adverse response to lamotrigine and phenytoin	311	0.7472	0.02703
Core matrisome	ECM Glycoproteins	NELL1	NEL-like 1 (chicken)	7750	rs4569005	11	Orchitis and epididymitis	601.3	Adverse response to lamotrigine and phenytoin	137	1.471	0.02714
Core matrisome	ECM Glycoproteins	NELL1	NEL-like 1 (chicken)	7750	rs4569005	11	Disorders of liver	573	Adverse response to lamotrigine and phenytoin	1706	0.8862	0.02778
Core matrisome	ECM Glycoproteins	NELL1	NEL-like 1 (chicken)	7750	rs4569005	11	Precordial pain	418.1	Adverse response to lamotrigine and phenytoin	223	0.7135	0.02957
Core matrisome	ECM Glycoproteins	NELL1	NEL-like 1 (chicken)	7750	rs4569005	11	Postmenopausal atrophic vaginitis	627.3	Adverse response to lamotrigine and phenytoin	526	1.26	0.03066
Core matrisome	ECM Glycoproteins	NELL1	NEL-like 1 (chicken)	7750	rs4569005	11	Diseases of esophagus	530	Adverse response to lamotrigine and phenytoin	3812	0.9148	0.03243
Core matrisome	ECM Glycoproteins	NELL1	NEL-like 1 (chicken)	7750	rs4569005	11	Aneurysm of artery of lower extremity	442.3	Adverse response to lamotrigine and phenytoin	85	0.5555	0.03318
Core matrisome	ECM Glycoproteins	NELL1	NEL-like 1 (chicken)	7750	rs4569005	11	Neck pain	761	Adverse response to lamotrigine and phenytoin	2298	1.107	0.03417
Core matrisome	ECM Glycoproteins	NELL1	NEL-like 1 (chicken)	7750	rs4569005	11	Type 1 diabetic retinopathy	250.13	Adverse response to lamotrigine and phenytoin	129	1.403	0.03478
Core matrisome	ECM Glycoproteins	NELL1	NEL-like 1 (chicken)	7750	rs4569005	11	Decreased libido	302.1	Adverse response to lamotrigine and phenytoin	34	0.3353	0.0356
Core matrisome	ECM Glycoproteins	NELL1	NEL-like 1 (chicken)	7750	rs4569005	11	Dysuria	599.3	Adverse response to lamotrigine and phenytoin	914	0.8477	0.03623
Core matrisome	ECM Glycoproteins	NELL1	NEL-like 1 (chicken)	7750	rs4569005	11	Actinic keratosis	702.1	Adverse response to lamotrigine and phenytoin	2505	1.114	0.03701
Core matrisome	ECM Glycoproteins	NELL1	NEL-like 1 (chicken)	7750	rs4569005	11	Muscular wasting and disuse atrophy	772.1	Adverse response to lamotrigine and phenytoin	67	0.5293	0.0381
Core matrisome	ECM Glycoproteins	NELL1	NEL-like 1 (chicken)	7750	rs4569005	11	Other signs and symptoms in breast	613.7	Adverse response to lamotrigine and phenytoin	174	0.6929	0.03842
Core matrisome	ECM Glycoproteins	NELL1	NEL-like 1 (chicken)	7750	rs4569005	11	Allergies, other	949	Adverse response to lamotrigine and phenytoin	323	1.258	0.03936
Core matrisome	ECM Glycoproteins	NELL1	NEL-like 1 (chicken)	7750	rs4569005	11	Hypertrophy of breast (Gynecomastia)	612.2	Adverse response to lamotrigine and phenytoin	170	0.7026	0.0404
Core matrisome	ECM Glycoproteins	NELL1	NEL-like 1 (chicken)	7750	rs4569005	11	Mycoses	117	Adverse response to lamotrigine and phenytoin	80	0.5701	0.04044
Core matrisome	ECM Glycoproteins	NELL1	NEL-like 1 (chicken)	7750	rs4569005	11	Sicca syndrome	709.2	Adverse response to lamotrigine and phenytoin	100	0.6118	0.04113
Core matrisome	ECM Glycoproteins	NELL1	NEL-like 1 (chicken)	7750	rs4569005	11	Abnormal coagulation profile	286.9	Adverse response to lamotrigine and phenytoin	166	1.344	0.04151
Core matrisome	ECM Glycoproteins	NELL1	NEL-like 1 (chicken)	7750	rs4569005	11	Pathological, developmental or recurrent dislocation	742.2	Adverse response to lamotrigine and phenytoin	38	0.3883	0.0418
Core matrisome	ECM Glycoproteins	NELL1	NEL-like 1 (chicken)	7750	rs4569005	11	Esophagitis, GERD and related diseases	530.1	Adverse response to lamotrigine and phenytoin	3548	0.9168	0.04197
Core matrisome	ECM Glycoproteins	NELL1	NEL-like 1 (chicken)	7750	rs4569005	11	Scar conditions and fibrosis of skin	702.3	Adverse response to lamotrigine and phenytoin	235	1.295	0.04237
Core matrisome	ECM Glycoproteins	NELL1	NEL-like 1 (chicken)	7750	rs4569005	11	Circumscribed scleroderma	693	Adverse response to lamotrigine and phenytoin	143	0.6797	0.04488
Core matrisome	ECM Glycoproteins	NELL1	NEL-like 1 (chicken)	7750	rs4569005	11	Other abnormality of urination	599.9	Adverse response to lamotrigine and phenytoin	471	0.8128	0.04525
Core matrisome	ECM Glycoproteins	NELL1	NEL-like 1 (chicken)	7750	rs4569005	11	Cellulitis and abscess of trunk	681.7	Adverse response to lamotrigine and phenytoin	229	1.283	0.04623
Core matrisome	ECM Glycoproteins	NELL1	NEL-like 1 (chicken)	7750	rs4569005	11	Primary/intrinsic cardiomyopathies	425.1	Adverse response to lamotrigine and phenytoin	546	1.181	0.04656
Core matrisome	ECM Glycoproteins	NELL1	NEL-like 1 (chicken)	7750	rs4569005	11	Other dermatoses	702	Adverse response to lamotrigine and phenytoin	4203	1.095	0.04669
Core matrisome	ECM Glycoproteins	NELL1	NEL-like 1 (chicken)	7750	rs4569005	11	Cancer of the upper aerodigestive tract	149	Adverse response to lamotrigine and phenytoin	150	0.6864	0.04677
Core matrisome	ECM Glycoproteins	NELL1	NEL-like 1 (chicken)	7750	rs4569005	11	Dementia with cerebral degenerations	290.12	Adverse response to lamotrigine and phenytoin	82	0.5837	0.04778
Core matrisome	ECM Glycoproteins	NELL1	NEL-like 1 (chicken)	7750	rs4569005	11	Corneal degenerations	364.4	Adverse response to lamotrigine and phenytoin	184	1.33	0.04903
Core matrisome	ECM Glycoproteins	NELL1	NEL-like 1 (chicken)	7750	rs4569005	11	Dyshidrosis	705.1	Adverse response to lamotrigine and phenytoin	68	1.535	0.04946
Core matrisome	ECM Glycoproteins	NELL1	NEL-like 1 (chicken)	7750	rs4569005	11	Acute tonsillitis	474.1	Adverse response to lamotrigine and phenytoin	84	1.519	0.04954
Core matrisome	ECM Glycoproteins	NELL1	NEL-like 1 (chicken)	7750	rs4569005	11	Sarcoidosis	697	Adverse response to lamotrigine and phenytoin	69	0.5603	0.0499
Core matrisome	ECM Glycoproteins	NELL1	NEL-like 1 (chicken)	7750	rs4569005	11	Other pulmonary inflamation or edema	505	Adverse response to lamotrigine and phenytoin	204	0.7363	0.04992
Core matrisome	ECM Glycoproteins	NOV	nephroblastoma overexpressed gene	7885	rs2071518	8	Hirsutism	704.2	Pulse Pressure	62	1.952	5.093e-4
Core matrisome	ECM Glycoproteins	NOV	nephroblastoma overexpressed gene	7885	rs2071518	8	Bacteremia	038.3	Pulse Pressure	237	0.6691	5.762e-4
Core matrisome	ECM Glycoproteins	NOV	nephroblastoma overexpressed gene	7885	rs2071518	8	Other specified diseases of the salivary glands	527.8	Pulse Pressure	53	1.972	8.284e-4
Core matrisome	ECM Glycoproteins	NOV	nephroblastoma overexpressed gene	7885	rs2071518	8	Other and unspecified disc disorder	722.9	Pulse Pressure	102	0.5474	0.00187
Core matrisome	ECM Glycoproteins	NOV	nephroblastoma overexpressed gene	7885	rs2071518	8	Chorioretinal scars	363.3	Pulse Pressure	118	1.547	0.002286
Core matrisome	ECM Glycoproteins	NOV	nephroblastoma overexpressed gene	7885	rs2071518	8	Vitamin deficiency	261	Pulse Pressure	640	1.206	0.003252
Core matrisome	ECM Glycoproteins	NOV	nephroblastoma overexpressed gene	7885	rs2071518	8	Coma; stupor; and brain damage	348.1	Pulse Pressure	765	0.8269	0.003422
Core matrisome	ECM Glycoproteins	NOV	nephroblastoma overexpressed gene	7885	rs2071518	8	Septicemia	038	Pulse Pressure	605	0.8145	0.003694
Core matrisome	ECM Glycoproteins	NOV	nephroblastoma overexpressed gene	7885	rs2071518	8	Hyperlipidemia	272.1	Pulse Pressure	7893	1.109	0.004743
Core matrisome	ECM Glycoproteins	NOV	nephroblastoma overexpressed gene	7885	rs2071518	8	Actinic keratosis	702.1	Pulse Pressure	2505	1.124	0.004984
Core matrisome	ECM Glycoproteins	NOV	nephroblastoma overexpressed gene	7885	rs2071518	8	Sepsis and SIRS	994	Pulse Pressure	290	0.7551	0.006149
Core matrisome	ECM Glycoproteins	NOV	nephroblastoma overexpressed gene	7885	rs2071518	8	Sepsis	994.2	Pulse Pressure	270	0.7468	0.006178
Core matrisome	ECM Glycoproteins	NOV	nephroblastoma overexpressed gene	7885	rs2071518	8	Cancer of brain and nervous system	191.1	Pulse Pressure	68	0.5322	0.006973
Core matrisome	ECM Glycoproteins	NOV	nephroblastoma overexpressed gene	7885	rs2071518	8	Brain cancer	191.11	Pulse Pressure	61	0.5094	0.007043
Core matrisome	ECM Glycoproteins	NOV	nephroblastoma overexpressed gene	7885	rs2071518	8	Disorders of lipoid metabolism	272	Pulse Pressure	8000	1.103	0.007057
Core matrisome	ECM Glycoproteins	NOV	nephroblastoma overexpressed gene	7885	rs2071518	8	Fracture of humerus	803.1	Pulse Pressure	331	0.7728	0.008556
Core matrisome	ECM Glycoproteins	NOV	nephroblastoma overexpressed gene	7885	rs2071518	8	Esophageal bleeding	530.2	Pulse Pressure	56	0.5049	0.008697
Core matrisome	ECM Glycoproteins	NOV	nephroblastoma overexpressed gene	7885	rs2071518	8	Mental disorders due to brain damage	291.4	Pulse Pressure	435	0.792	0.009218
Core matrisome	ECM Glycoproteins	NOV	nephroblastoma overexpressed gene	7885	rs2071518	8	Malignant neoplasm of brain and nervous system	191	Pulse Pressure	123	0.6558	0.009701
Core matrisome	ECM Glycoproteins	NOV	nephroblastoma overexpressed gene	7885	rs2071518	8	Hypertensive chronic kidney disease	401.22	Pulse Pressure	736	1.206	0.0098
Core matrisome	ECM Glycoproteins	NOV	nephroblastoma overexpressed gene	7885	rs2071518	8	Otorrhea	381.9	Pulse Pressure	35	1.885	0.009899
Core matrisome	ECM Glycoproteins	NOV	nephroblastoma overexpressed gene	7885	rs2071518	8	Bladder neck obstruction	596.1	Pulse Pressure	308	0.7705	0.009972
Core matrisome	ECM Glycoproteins	NOV	nephroblastoma overexpressed gene	7885	rs2071518	8	Other disorders of circulatory system	459	Pulse Pressure	979	1.147	0.01064
[truncated: 9,876 more rows]
