# Supplementary material for: The Human Extracellular Matrix Diseasome Reveals Genotype–Phenotype Associations with Clinical Implications for Age-Related Diseases
Source: Biomedicines. 2023 Apr 19;11(4):1212. doi: 10.3390/biomedicines11041212 (PMC10135578; doi:10.3390/biomedicines11041212)
Supplement: Supplementary file 1 [file biomedicines-11-01212-s001.zip › Table_S2_matrisomeProteinComplex_data_table.csv]

division	category	Gene Symbol	Gene Name	geneid	Disease	Ensembl	Literature annotation	Probability value	Cyto-genetic band	Synonyms	HGNC_IDs Links	UniProt_IDs	Refseq_IDs
Matrisome-associated	ECM Regulators	F9	coagulation factor IX	3551	Immunoneurologic disorder, x-linked 300076	ENSG00000101981	1	0.3073	Xq27.1	FIX|HEMB|MGC129641|MGC129642|PTC	3551	P00740	NP_000124.1
Matrisome-associated	ECM Regulators	LOXL3	lysyl oxidase-like 3	13869	Preeclampsia 189800	ENSG00000115318	1	0.2614	2p13.1	LOXL	13869	B8ZZT6:B9A025:C9J5M1:E7END4:H7C248:P58215	NP_001276093.1:NP_001276094.1:NP_115992.1
Matrisome-associated	ECM Regulators	SERPINB2	serpin peptidase inhibitor, clade B (ovalbumin), member 2	8584	Loss of heterozygosity, 18, chromosomal region 1 603045	ENSG00000197632	1	0.4371	18q21.33	HsT1201|PAI|PAI-2|PAI2|PLANH2	8584	E7EPJ9:E7ERB5:E9PDK7:P05120	NP_001137290.1:NP_002566.1
Matrisome-associated	Secreted Factors	EDA	ectodysplasin A	3157	Dystonia 314250	ENSG00000158813	1#	0.1662	Xq13.1	ED1|ED1-A1|ED1-A2|EDA1|EDA2|HED|STHAGX1|XHED|XLHED	3157	D6RA95:Q92838	NP_001005609.1:NP_001005610.2:NP_001005612.2:NP_001005613.1:NP_001390.1
Matrisome-associated	Secreted Factors	EDA	ectodysplasin A	3157	Mental retardation, x- linked 20 300047	ENSG00000158813	1	0.2939	Xq13.1	ED1|ED1-A1|ED1-A2|EDA1|EDA2|HED|STHAGX1|XHED|XLHED	3157	D6RA95:Q92838	NP_001005609.1:NP_001005610.2:NP_001005612.2:NP_001005613.1:NP_001390.1
Matrisome-associated	Secreted Factors	FGF13	fibroblast growth factor 13	3670	Mental retardation, x- linked, syndromic 11 300238	ENSG00000129682	2	0.2917	Xq26.3	FGF2|FHF-2|FHF2	3670	B1AJW0:B1AK17:B1B1H9:Q92913	NP_001132970.1:NP_001132972.1:NP_001132973.1:NP_001132974.1:NP_004105.1:NP_378668.1:XP_005262456.1
Matrisome-associated	Secreted Factors	FGF19	fibroblast growth factor 19	3675	Cervical carcinoma 191181	ENSG00000162344	1#	0.1318	11q13.3	-	3675	O95750	NP_005108.1
Matrisome-associated	Secreted Factors	FGF2	fibroblast growth factor 2 (basic)	3676	Fibrodysplasia ossificans progressiva 135100	ENSG00000138685	2#*	0.3651	4q27	BFGF|FGFB|HBGF-2	3676	P09038	NP_001997.5
Matrisome-associated	Secreted Factors	FGF23	fibroblast growth factor 23	3680	Myeloproliferative disorder	ENSG00000118972	2	0.4964	12p13.32	ADHR|HPDR2|HYPF|PHPTC	3680	Q9GZV9	NP_065689.1
Matrisome-associated	Secreted Factors	FGF3	fibroblast growth factor 3 (murine mammary tumor virus integration site (v-int-2) oncogene homolog)	3681	Cervical carcinoma 191181	ENSG00000186895	2#	0.1318	11q13.3	HBGF-3|INT2	3681	P11487	NP_005238.1
Matrisome-associated	Secreted Factors	FGF4	fibroblast growth factor 4	3682	Cervical carcinoma 191181	ENSG00000075388	2#	0.1318	11q13.3	HBGF-4|HST|HST-1|HSTF1|K-FGF|KFGF	3682	P08620	NP_001998.1:XP_005273904.1:XP_006718538.1
Matrisome-associated	Secreted Factors	FGF6	fibroblast growth factor 6	3684	Myeloproliferative disorder 131440	ENSG00000111241	2	0.4964	12p13.32	HBGF-6|HST2	3684	H0YGZ9:P10767	NP_066276.2
Matrisome-associated	Secreted Factors	FGF9	fibroblast growth factor 9 (glia-activating factor)	3687	Myeloproliferative disorder / non Hodgkin lymphoma 602221	ENSG00000102678	1#	1	13q12.11	GAF|HBFG-9|MGC119914|MGC119915|SYNS3	3687	P31371	NP_002001.1
Matrisome-associated	Secreted Factors	IL12B	interleukin 12B (natural killer cell stimulatory factor 2, cytotoxic lymphocyte maturation factor 2, p40)	5970	Eosinophilia, familial 131400	ENSG00000113302	1#	0.2334	5q33.3	CLMF|CLMF2|IL-12B|NKSF|NKSF2	5970	P29460	NP_002178.2
Matrisome-associated	Secreted Factors	IL12B	interleukin 12B (natural killer cell stimulatory factor 2, cytotoxic lymphocyte maturation factor 2, p40)	5970	Asthma, susceptibility to	ENSG00000113302	2	0.4539	5q33.3	CLMF|CLMF2|IL-12B|NKSF|NKSF2	5970	P29460	NP_002178.2
Matrisome-associated	Secreted Factors	IL9	interleukin 9	6029	Asthma, susceptibility to	ENSG00000145839	2	0.546	5q31.1	HP40|IL-9|P40	6029	P15248	NP_000581.1
Matrisome-associated	Secreted Factors	IL9	interleukin 9	6029	Eosinophilia, familial 131400	ENSG00000145839	2*	0.6863	5q31.1	HP40|IL-9|P40	6029	P15248	NP_000581.1
Matrisome-associated	Secreted Factors	IL9	interleukin 9	6029	Immunoglobulin E concentration, serum 147061	ENSG00000145839	2	0.9998	5q31.1	HP40|IL-9|P40	6029	P15248	NP_000581.1
Matrisome-associated	Secreted Factors	INS	insulin	6081	Diabetes mellitus, iddm2 125852	ENSG00000129965	2	0.9998	11p15.5	ILPR|IRDN	6081	A6XGL2:C9JNR5:P01308	NP_000198.1:NP_001172026.1:NP_001172027.1:NP_001278826.1
Matrisome-associated	Secreted Factors	TNF	tumor necrosis factor (TNF superfamily, member 2)	11892	Malaria, susceptibility to	ENSG00000111956	2	1	6p21.33	DIF|TNF-alpha|TNFA|TNFSF2	11892	P01375	NP_000585.2
NA	NA	ITGA2	NA	NA	Klippel-feil malformation 214300	ENSG00000164171	1	0.3546	5q11.2	NA	NA	NA	NA
NA	NA	ITGB7	NA	NA	Charcot-Marie-Tooth disease 608591	ENSG00000139626	1	0.4249	12q13.13	NA	NA	NA	NA
