# Supplementary material for: The Human Extracellular Matrix Diseasome Reveals Genotype–Phenotype Associations with Clinical Implications for Age-Related Diseases
Source: Biomedicines. 2023 Apr 19;11(4):1212. doi: 10.3390/biomedicines11041212 (PMC10135578; doi:10.3390/biomedicines11041212)
Supplement: Supplementary file 1 [file biomedicines-11-01212-s001.zip › Table_S3_matrsiome-matrisome-interaction_ecm.csv]

Entrez ID 1	Symbol 1	Entrez ID 2	Symbol 2	Data Source (R: Rual et al; S: Stelzl et al; L: Literature curation)
2	A2M	259	AMBP	L
2	A2M	1508	CTSB	L
2	A2M	3553	IL1B	L
2	A2M	3586	IL10	L
2	A2M	3952	LEP	L
2	A2M	7045	TGFBI	L
2	A2M	8728	ADAM19	L
2	A2M	9510	ADAMTS1	L
12	SERPINA3	1511	CTSG	L
12	SERPINA3	4485	MST1	L
183	AGT	4224	MEP1A	L
183	AGT	5553	PRG2	L
259	AMBP	2147	F2	L
259	AMBP	2335	FN1	L
268	AMH	5125	PCSK5	L
284	ANGPT1	285	ANGPT2	L
301	ANXA1	6282	S100A11	L
301	ANXA1	7052	TGM2	L
302	ANXA2	1508	CTSB	L
302	ANXA2	5327	PLAT	L
302	ANXA2	5340	PLG	L
302	ANXA2	6277	S100A6	L
302	ANXA2	6281	S100A10	L
308	ANXA5	1280	COL2A1	L
308	ANXA5	1300	COL10A1	L
309	ANXA6	6271	S100A1	L
309	ANXA6	6285	S100B	L
310	ANXA7	6281	S100A10	L
311	ANXA11	6277	S100A6	L
356	FASLG	2335	FN1	L
356	FASLG	4316	MMP7	L
374	AREG	4318	MMP9	L
462	SERPINC1	2147	F2	L
462	SERPINC1	5340	PLG	L
462	SERPINC1	6383	SDC2	L
627	BDNF	4908	NTF3	L
633	BGN	1277	COL1A1	L
633	BGN	1278	COL1A2	L
633	BGN	1284	COL4A2	L
633	BGN	2006	ELN	L
633	BGN	4237	MFAP2	L
633	BGN	7040	TGFB1	L
633	BGN	7124	TNF	L
649	BMP1	3909	LAMA3	L
649	BMP1	3914	LAMB3	L
649	BMP1	3918	LAMC2	L
650	BMP2	1280	COL2A1	L
650	BMP2	4256	MGP	L
650	BMP2	7040	TGFB1	L
650	BMP2	7042	TGFB2	L
651	BMP3	7040	TGFB1	L
652	BMP4	656	BMP8B	L
653	BMP5	10468	FST	L
685	BTC	4318	MMP9	L
710	SERPING1	2147	F2	L
710	SERPING1	5327	PLAT	L
710	SERPING1	5340	PLG	L
710	SERPING1	5648	MASP1	L
710	SERPING1	10747	MASP2	L
712	C1QA	713	C1QB	L
712	C1QA	1280	COL2A1	L
712	C1QA	1634	DCN	L
712	C1QA	2335	FN1	L
712	C1QA	3273	HRG	L
713	C1QB	3273	HRG	L
1101	CHAD	1280	COL2A1	L
1277	COL1A1	1294	COL7A1	L
1277	COL1A1	1634	DCN	L
1277	COL1A1	2252	FGF7	L
1277	COL1A1	2335	FN1	L
1277	COL1A1	3486	IGFBP3	L
1277	COL1A1	4147	MATN2	L
1277	COL1A1	4313	MMP2	L
1277	COL1A1	4318	MMP9	L
1277	COL1A1	4811	NID1	L
1277	COL1A1	5155	PDGFB	L
1277	COL1A1	5549	PRELP	L
1277	COL1A1	6678	SPARC	L
1277	COL1A1	7045	TGFBI	L
1277	COL1A1	7057	THBS1	L
1277	COL1A1	7450	VWF	L
1278	COL1A2	1634	DCN	L
1278	COL1A2	2335	FN1	L
1278	COL1A2	4060	LUM	L
1278	COL1A2	4318	MMP9	L
1278	COL1A2	6678	SPARC	L
1278	COL1A2	7045	TGFBI	L
1278	COL1A2	7450	VWF	L
1278	COL1A2	50509	COL5A3	L
1280	COL2A1	1291	COL6A1	L
1280	COL2A1	1298	COL9A2	L
1280	COL2A1	1299	COL9A3	L
1280	COL2A1	1311	COMP	L
1280	COL2A1	1634	DCN	L
1280	COL2A1	2252	FGF7	L
1280	COL2A1	2335	FN1	L
1280	COL2A1	4146	MATN1	L
1280	COL2A1	5549	PRELP	L
1280	COL2A1	6678	SPARC	L
1280	COL2A1	7040	TGFB1	L
1280	COL2A1	7045	TGFBI	L
1280	COL2A1	7057	THBS1	L
1280	COL2A1	84171	LOXL4	L
1281	COL3A1	2252	FGF7	L
1281	COL3A1	6678	SPARC	L
1281	COL3A1	7057	THBS1	L
1282	COL4A1	1284	COL4A2	L
1282	COL4A1	1294	COL7A1	L
1282	COL4A1	1634	DCN	L
1282	COL4A1	2199	FBLN2	L
1282	COL4A1	3026	HABP2	L
1282	COL4A1	4147	MATN2	L
1282	COL4A1	4318	MMP9	L
1282	COL4A1	5008	OSM	L
1282	COL4A1	5270	SERPINE2	L
1282	COL4A1	7045	TGFBI	L
1284	COL4A2	1634	DCN	L
1284	COL4A2	2199	FBLN2	L
1284	COL4A2	3026	HABP2	L
1284	COL4A2	4147	MATN2	L
1284	COL4A2	4318	MMP9	L
1284	COL4A2	5008	OSM	L
1284	COL4A2	5270	SERPINE2	L
1284	COL4A2	7045	TGFBI	L
1285	COL4A3	1634	DCN	L
1285	COL4A3	2199	FBLN2	L
1285	COL4A3	2335	FN1	L
1285	COL4A3	3026	HABP2	L
1285	COL4A3	4147	MATN2	L
1285	COL4A3	4237	MFAP2	L
1285	COL4A3	4318	MMP9	L
1285	COL4A3	5008	OSM	L
1285	COL4A3	5270	SERPINE2	L
1285	COL4A3	7045	TGFBI	L
1286	COL4A4	1634	DCN	L
1286	COL4A4	2199	FBLN2	L
1286	COL4A4	2335	FN1	L
1286	COL4A4	3026	HABP2	L
1286	COL4A4	4147	MATN2	L
1286	COL4A4	4318	MMP9	L
1286	COL4A4	5008	OSM	L
1286	COL4A4	5270	SERPINE2	L
1286	COL4A4	7045	TGFBI	L
1287	COL4A5	1634	DCN	L
1287	COL4A5	2199	FBLN2	L
1287	COL4A5	2335	FN1	L
1287	COL4A5	3026	HABP2	L
1287	COL4A5	4147	MATN2	L
1287	COL4A5	4318	MMP9	L
1287	COL4A5	5008	OSM	L
1287	COL4A5	5270	SERPINE2	L
1288	COL4A6	1634	DCN	L
1288	COL4A6	2199	FBLN2	L
1288	COL4A6	2335	FN1	L
1288	COL4A6	4147	MATN2	L
1288	COL4A6	4318	MMP9	L
1288	COL4A6	5008	OSM	L
1288	COL4A6	5270	SERPINE2	L
1289	COL5A1	7057	THBS1	L
1289	COL5A1	9672	SDC3	L
1289	COL5A1	50509	COL5A3	L
1291	COL6A1	3912	LAMB1	L
1294	COL7A1	2335	FN1	L
1294	COL7A1	3911	LAMA5	L
1294	COL7A1	3914	LAMB3	L
1294	COL7A1	3918	LAMC2	L
1294	COL7A1	4313	MMP2	L
1294	COL7A1	7057	THBS1	L
1295	COL8A1	1296	COL8A2	L
1295	COL8A1	30008	EFEMP2	R
1305	COL13A1	2335	FN1	L
1305	COL13A1	3339	HSPG2	L
1305	COL13A1	4811	NID1	L
1305	COL13A1	6678	SPARC	L
1305	COL13A1	22795	NID2	L
1435	CSF1	7124	TNF	L
1437	CSF2	4254	KITLG	L
1437	CSF2	5553	PRG2	L
1437	CSF2	6383	SDC2	L
1471	CST3	1508	CTSB	L
1471	CST3	1520	CTSS	L
1473	CST5	1520	CTSS	L
1475	CSTA	1508	CTSB	L
1475	CSTA	1512	CTSH	L
1475	CSTA	1514	CTSL	L
1475	CSTA	5764	PTN	S
1476	CSTB	1508	CTSB	L
1476	CSTB	1509	CTSD	L
1476	CSTB	1512	CTSH	L
1476	CSTB	1514	CTSL	L
1490	CTGF	7040	TGFB1	L
1490	CTGF	7042	TGFB2	L
1490	CTGF	7043	TGFB3	L
1508	CTSB	5275	SERPINB13	L
1508	CTSB	6281	S100A10	L
1508	CTSB	8530	CST7	L
1509	CTSD	2335	FN1	L
1511	CTSG	3827	KNG1	L
1511	CTSG	5275	SERPINB13	L
1511	CTSG	5473	PPBP	L
1511	CTSG	6382	SDC1	L
1511	CTSG	7057	THBS1	L
1513	CTSK	5275	SERPINB13	L
1513	CTSK	6317	SERPINB3	L
1514	CTSL	3827	KNG1	L
1514	CTSL	5275	SERPINB13	L
1514	CTSL	6317	SERPINB3	L
1514	CTSL	8530	CST7	L
1514	CTSL	80781	COL18A1	L
1520	CTSS	3827	KNG1	L
1520	CTSS	6317	SERPINB3	L
1520	CTSS	6318	SERPINB4	L
1634	DCN	2006	ELN	L
1634	DCN	2200	FBN1	L
1634	DCN	2335	FN1	L
1634	DCN	6441	SFTPD	L
1634	DCN	7040	TGFB1	L
1634	DCN	7057	THBS1	L
1634	DCN	7124	TNF	L
1634	DCN	7373	COL14A1	L
1755	DMBT1	6435	SFTPA1	L
1755	DMBT1	6441	SFTPD	L
1805	DPT	4015	LOX	L
1839	HBEGF	4316	MMP7	L
1950	EGF	2250	FGF5	L
1950	EGF	3084	NRG1	L
1950	EGF	7448	VTN	L
2006	ELN	2192	FBLN1	L
2006	ELN	2199	FBLN2	L
2006	ELN	2200	FBN1	L
2006	ELN	2201	FBN2	L
2006	ELN	2219	FCN1	L
2006	ELN	3958	LGALS3	L
2006	ELN	4015	LOX	L
2006	ELN	4237	MFAP2	L
2006	ELN	22795	NID2	L
2147	F2	2158	F9	L
2147	F2	2243	FGA	L
2147	F2	3053	SERPIND1	L
2147	F2	3827	KNG1	L
2147	F2	5054	SERPINE1	L
2147	F2	5104	SERPINA5	L
2147	F2	5269	SERPINB6	L
2147	F2	5270	SERPINE2	L
2147	F2	5271	SERPINB8	L
2147	F2	7057	THBS1	L
2155	F7	2158	F9	L
2155	F7	2159	F10	L
2159	F10	5104	SERPINA5	L
2159	F10	5269	SERPINB6	L
2159	F10	5271	SERPINB8	L
2159	F10	5327	PLAT	L
2159	F10	5340	PLG	L
2162	F13A1	2165	F13B	L
2162	F13A1	2243	FGA	L
2162	F13A1	2266	FGG	L
2162	F13A1	2335	FN1	L
2165	F13B	2266	FGG	L
2192	FBLN1	2244	FGB	L
2192	FBLN1	2335	FN1	L
2192	FBLN1	3339	HSPG2	L
2192	FBLN1	4856	NOV	L
2192	FBLN1	8076	MFAP5	L
2199	FBLN2	2200	FBN1	L
2199	FBLN2	2335	FN1	L
2199	FBLN2	3339	HSPG2	L
2199	FBLN2	3911	LAMA5	L
2199	FBLN2	4811	NID1	L
2199	FBLN2	5549	PRELP	L
2199	FBLN2	63827	BCAN	L
2199	FBLN2	80781	COL18A1	L
2199	FBLN2	284217	LAMA1	L
2200	FBN1	2201	FBN2	L
2200	FBN1	4237	MFAP2	L
2200	FBN1	8076	MFAP5	L
2201	FBN2	4147	MATN2	L
2201	FBN2	8076	MFAP5	L
2219	FCN1	7040	TGFB1	L
2220	FCN2	5648	MASP1	L
2220	FCN2	10747	MASP2	L
2239	GPC4	2247	FGF2	L
2239	GPC4	80781	COL18A1	L
2243	FGA	2244	FGB	L
2243	FGA	2266	FGG	L
2243	FGA	3273	HRG	L
2243	FGA	4811	NID1	L
2243	FGA	5104	SERPINA5	L
2243	FGA	5327	PLAT	L
2243	FGA	7057	THBS1	L
2244	FGB	2266	FGG	L
2244	FGB	4018	LPA	L
2244	FGB	4811	NID1	L
2244	FGB	5104	SERPINA5	L
2246	FGF1	6284	S100A13	L
2246	FGF1	9982	FGFBP1	L
2247	FGF2	2719	GPC3	L
2247	FGF2	3339	HSPG2	L
2247	FGF2	5196	PF4	L
2247	FGF2	7448	VTN	L
2247	FGF2	9672	SDC3	L
2247	FGF2	9982	FGFBP1	L
2247	FGF2	10563	CXCL13	L
2250	FGF5	7039	TGFA	L
2252	FGF7	3339	HSPG2	L
2266	FGG	5104	SERPINA5	L
2266	FGG	7448	VTN	L
2323	FLT3LG	4254	KITLG	L
2331	FMOD	7040	TGFB1	L
2331	FMOD	7042	TGFB2	L
2331	FMOD	7043	TGFB3	L
2335	FN1	3371	TNC	L
2335	FN1	3486	IGFBP3	L
2335	FN1	4018	LPA	L
2335	FN1	4052	LTBP1	L
2335	FN1	4147	MATN2	L
2335	FN1	4224	MEP1A	L
2335	FN1	4225	MEP1B	L
2335	FN1	4318	MMP9	L
2335	FN1	4856	NOV	L
2335	FN1	5068	REG3A	L
2335	FN1	5549	PRELP	L
2335	FN1	6383	SDC2	L
2335	FN1	6387	CXCL12	L
2335	FN1	7045	TGFBI	L
2335	FN1	7052	TGM2	L
2335	FN1	7057	THBS1	L
2661	GDF9	5272	SERPINB9	S
2661	GDF9	6279	S100A8	S
2661	GDF9	6997	TDGF1	S
2661	GDF9	78987	CRELD1	S
2719	GPC3	3481	IGF2	L
2817	GPC1	6585	SLIT1	L
2817	GPC1	9353	SLIT2	L
2817	GPC1	80781	COL18A1	L
2920	CXCL2	5340	PLG	L
3082	HGF	3083	HGFAC	L
3082	HGF	6382	SDC1	L
3082	HGF	6383	SDC2	L
3082	HGF	7123	CLEC3B	L
3273	HRG	5340	PLG	L
3273	HRG	7057	THBS1	L
3339	HSPG2	5155	PDGFB	L
3339	HSPG2	5549	PRELP	L
3339	HSPG2	6678	SPARC	L
3339	HSPG2	9982	FGFBP1	L
3339	HSPG2	22795	NID2	L
3339	HSPG2	284217	LAMA1	L
3439	IFNA1	3558	IL2	L
3479	IGF1	3483	IGFALS	L
3479	IGF1	3484	IGFBP1	L
3479	IGF1	3485	IGFBP2	L
3479	IGF1	3486	IGFBP3	L
3479	IGF1	3487	IGFBP4	L
3479	IGF1	3488	IGFBP5	L
3479	IGF1	3489	IGFBP6	L
3479	IGF1	3490	IGFBP7	L
3479	IGF1	4856	NOV	L
3481	IGF2	3484	IGFBP1	L
3481	IGF2	3485	IGFBP2	L
3481	IGF2	3486	IGFBP3	L
3481	IGF2	3487	IGFBP4	L
3481	IGF2	3488	IGFBP5	L
3481	IGF2	3489	IGFBP6	L
3481	IGF2	3490	IGFBP7	L
3481	IGF2	4856	NOV	L
3481	IGF2	7448	VTN	L
3483	IGFALS	3486	IGFBP3	L
3483	IGFALS	3488	IGFBP5	L
3486	IGFBP3	4052	LTBP1	L
3486	IGFBP3	5340	PLG	L
3486	IGFBP3	8038	ADAM12	L
3486	IGFBP3	60676	PAPPA2	L
3488	IGFBP5	5054	SERPINE1	L
3488	IGFBP5	6696	SPP1	L
3488	IGFBP5	7057	THBS1	L
3488	IGFBP5	8038	ADAM12	L
3490	IGFBP7	3624	INHBA	L
3490	IGFBP7	3627	CXCL10	L
3490	IGFBP7	3630	INS	L
3490	IGFBP7	6352	CCL5	L
3490	IGFBP7	6366	CCL21	L
3490	IGFBP7	6382	SDC1	L
3552	IL1A	6284	S100A13	L
3592	IL12A	3593	IL12B	L
3603	IL16	30008	EFEMP2	R
3623	INHA	3624	INHBA	L
3623	INHA	3625	INHBB	L
3624	INHBA	3625	INHBB	L
3624	INHBA	3626	INHBC	L
3624	INHBA	10272	FSTL3	L
3624	INHBA	25884	CHRDL2	L
3625	INHBB	3626	INHBC	L
3630	INS	4856	NOV	L
3730	KAL1	6383	SDC2	L
3827	KNG1	5340	PLG	L
3827	KNG1	7057	THBS1	L
3827	KNG1	7448	VTN	L
3909	LAMA3	3914	LAMB3	L
3909	LAMA3	5327	PLAT	L
3909	LAMA3	5340	PLG	L
3909	LAMA3	6383	SDC2	L
3910	LAMA4	5764	PTN	S
3911	LAMA5	3915	LAMC1	L
3911	LAMA5	4224	MEP1A	L
3914	LAMB3	3918	LAMC2	L
3914	LAMB3	7057	THBS1	L
3915	LAMC1	4811	NID1	L
3915	LAMC1	22795	NID2	L
3956	LGALS1	94025	MUC16	L
3957	LGALS2	4049	LTA	L
4016	LOXL1	10516	FBLN5	L
4018	LPA	10516	FBLN5	L
4049	LTA	4050	LTB	L
4054	LTBP3	7040	TGFB1	L
4054	LTBP3	7042	TGFB2	L
4054	LTBP3	7043	TGFB3	L
4060	LUM	4323	MMP14	L
4146	MATN1	4147	MATN2	L
4146	MATN1	4148	MATN3	L
4146	MATN1	8785	MATN4	L
4147	MATN2	8785	MATN4	L
4148	MATN3	8785	MATN4	L
4153	MBL2	5648	MASP1	L
4153	MBL2	10747	MASP2	L
4192	MDK	6382	SDC1	L
4192	MDK	6385	SDC4	L
4192	MDK	7051	TGM1	L
4192	MDK	9672	SDC3	L
4224	MEP1A	4225	MEP1B	L
4224	MEP1A	284217	LAMA1	L
4239	MFAP4	6441	SFTPD	L
4254	KITLG	6320	CLEC11A	L
4312	MMP1	4316	MMP7	L
4312	MMP1	7076	TIMP1	L
4312	MMP1	63827	BCAN	L
4313	MMP2	4326	MMP17	L
4313	MMP2	6354	CCL7	L
4313	MMP2	6387	CXCL12	L
4313	MMP2	7040	TGFB1	L
4313	MMP2	7057	THBS1	L
4313	MMP2	7058	THBS2	L
4313	MMP2	7077	TIMP2	L
4313	MMP2	7078	TIMP3	L
4313	MMP2	7079	TIMP4	L
4313	MMP2	63827	BCAN	L
4313	MMP2	80781	COL18A1	L
4314	MMP3	7076	TIMP1	L
4314	MMP3	7078	TIMP3	L
4314	MMP3	63827	BCAN	L
4316	MMP7	4318	MMP9	L
4316	MMP7	63827	BCAN	L
4317	MMP8	7077	TIMP2	L
4317	MMP8	63827	BCAN	L
4318	MMP9	5858	PZP	L
4318	MMP9	6374	CXCL5	L
4318	MMP9	7057	THBS1	L
4318	MMP9	7058	THBS2	L
4318	MMP9	7078	TIMP3	L
4319	MMP10	63827	BCAN	L
4322	MMP13	7078	TIMP3	L
4322	MMP13	11096	ADAMTS5	L
4322	MMP13	63827	BCAN	L
4323	MMP14	7077	TIMP2	L
4323	MMP14	7078	TIMP3	L
4811	NID1	5328	PLAU	L
4811	NID1	5549	PRELP	L
5054	SERPINE1	5327	PLAT	L
5054	SERPINE1	5340	PLG	L
5054	SERPINE1	7448	VTN	L
5055	SERPINB2	5328	PLAU	L
5068	REG3A	5967	REG1A	L
5068	REG3A	6383	SDC2	L
5069	PAPPA	5340	PLG	L
5069	PAPPA	5553	PRG2	L
5104	SERPINA5	5327	PLAT	L
5104	SERPINA5	5328	PLAU	L
5155	PDGFB	7057	THBS1	L
5196	PF4	6383	SDC2	L
5265	SERPINA1	5644	PRSS1	L
5265	SERPINA1	5646	PRSS3	L
5269	SERPINB6	5328	PLAU	L
5269	SERPINB6	5340	PLG	L
5271	SERPINB8	5644	PRSS1	L
5274	SERPINI1	5327	PLAT	L
5275	SERPINB13	5340	PLG	L
5275	SERPINB13	5644	PRSS1	L
5327	PLAT	5328	PLAU	L
5327	PLAT	6678	SPARC	L
5327	PLAT	7123	CLEC3B	L
5327	PLAT	284217	LAMA1	L
5328	PLAU	5340	PLG	L
5328	PLAU	6768	ST14	L
5340	PLG	5345	SERPINF2	L
5340	PLG	6281	S100A10	L
5340	PLG	6678	SPARC	L
5340	PLG	7057	THBS1	L
5340	PLG	7123	CLEC3B	L
5340	PLG	284217	LAMA1	L
5345	SERPINF2	5644	PRSS1	L
5364	PLXNB1	10507	SEMA4D	L
5364	PLXNB1	10509	SEMA4B	L
5645	PRSS2	6590	SLPI	L
5764	PTN	6382	SDC1	L
5764	PTN	9672	SDC3	L
5764	PTN	23654	PLXNB2	S
5764	PTN	78987	CRELD1	S
5858	PZP	7040	TGFB1	L
5858	PZP	7042	TGFB2	L
6271	S100A1	6275	S100A4	RL
6271	S100A1	6285	S100B	RL
6271	S100A1	6286	S100P	R
6277	S100A6	6285	S100B	L
6279	S100A8	6280	S100A9	L
6282	S100A11	6285	S100B	L
6348	CCL3	6351	CCL4	L
6348	CCL3	7040	TGFB1	L
6352	CCL5	6382	SDC1	L
6352	CCL5	6385	SDC4	L
6383	SDC2	6678	SPARC	L
6422	SFRP1	7471	WNT1	L
6422	SFRP1	7472	WNT2	L
6422	SFRP1	54361	WNT4	L
6435	SFTPA1	6436	SFTPA2	L
6678	SPARC	7040	TGFB1	L
6678	SPARC	7052	TGM2	L
6678	SPARC	7057	THBS1	L
6868	ADAM17	7078	TIMP3	L
7040	TGFB1	7042	TGFB2	L
7040	TGFB1	7057	THBS1	L
7040	TGFB1	7448	VTN	L
7040	TGFB1	8425	LTBP4	L
7042	TGFB2	7043	TGFB3	L
7042	TGFB2	7448	VTN	L
7058	THBS2	7059	THBS3	L
7143	TNR	63827	BCAN	L
7869	SEMA3B	10371	SEMA3A	L
8482	SEMA7A	10154	PLXNC1	L
9244	CRLF1	23529	CLCF1	L
10468	FST	83729	INHBE	L
10673	TNFSF13B	407977	TNFSF12-TNFSF13	L
11117	EMILIN1	84034	EMILIN2	L
57402	S100A14	140576	S100A16	R
