# Supplementary material for: The Human Extracellular Matrix Diseasome Reveals Genotype–Phenotype Associations with Clinical Implications for Age-Related Diseases
Source: Biomedicines. 2023 Apr 19;11(4):1212. doi: 10.3390/biomedicines11041212 (PMC10135578; doi:10.3390/biomedicines11041212)
Supplement: Supplementary file 1 [file biomedicines-11-01212-s001.zip › Table_S4_HumanDisease_data.csv]

division	category	Gene Symbol	Gene Name	geneid	Disease ID	Disorder name	OMIM ID	Chromosome	Class	All involved genes	Synonyms	HGNC_IDs Links	UniProt_IDs	Refseq_IDs
Core matrisome	Collagens	COL10A1	collagen, type X, alpha 1	2185	997	Metaphyseal chondrodysplasia, Schmid type (3)	120110	6q21-q22.3	Connective tissue	COL10A1	-	2185	Q03692:Q5QPC7:Q5QPC8	NP_000484.2:XP_006715395.1:XP_006715396.1
Core matrisome	Collagens	COL10A1	collagen, type X, alpha 1	2185	1436	Spondylometaphyseal dysplasia, Japanese type (3)	120110	6q21-q22.3	Skeletal	COL10A1	-	2185	Q03692:Q5QPC7:Q5QPC8	NP_000484.2:XP_006715395.1:XP_006715396.1
Core matrisome	Collagens	COL11A1	collagen, type XI, alpha 1	2186	953	Marshall syndrome, 154780 (3)	120280	1p21	multiple	COL11A1, STL2	CO11A1|COLL6|STL2	2186	C9JMN2:H7C381:P12107	NP_001177638.1:NP_001845.3:NP_542196.2:NP_542197.3
Core matrisome	Collagens	COL11A1	collagen, type XI, alpha 1	2186	1447	Stickler syndrome, type II, 604841 (3)	120280	1p21	multiple	COL11A1, STL2	CO11A1|COLL6|STL2	2186	C9JMN2:H7C381:P12107	NP_001177638.1:NP_001845.3:NP_542196.2:NP_542197.3
Core matrisome	Collagens	COL11A2	collagen, type XI, alpha 2	2187	406	Deafness, autosomal dominant 13, 601868 (3)	120290	6p21.3	Ear,Nose,Throat	COL11A2, STL3, DFNA13	DFNA13|DFNB53|HKE5|PARP|STL3	2187	A2AAS7:H0Y3B3:H0Y3B5:H0Y3M9:H0YHM5:H0YHM9:H0YIS1:P13942:Q4VXY6	NP_001157243.1:NP_542411.2:NP_542412.2:NP_542410.2:NP_542412.2
Core matrisome	Collagens	COL11A2	collagen, type XI, alpha 2	2187	1151	OSMED syndrome, 215150 (3)	120290	6p21.3	Bone	COL11A2, STL3, DFNA13	DFNA13|DFNB53|HKE5|PARP|STL3	2187	A2AAS7:H0Y3B3:H0Y3B5:H0Y3M9:H0YHM5:H0YHM9:H0YIS1:P13942:Q4VXY6	NP_001157243.1:NP_542411.2:NP_542412.2:NP_542410.2:NP_542412.2
Core matrisome	Collagens	COL11A2	collagen, type XI, alpha 2	2187	1447	Stickler syndrome, type III, 184840 (3)	120290	6p21.3	multiple	COL11A2, STL3, DFNA13	DFNA13|DFNB53|HKE5|PARP|STL3	2187	A2AAS7:H0Y3B3:H0Y3B5:H0Y3M9:H0YHM5:H0YHM9:H0YIS1:P13942:Q4VXY6	NP_001157243.1:NP_542411.2:NP_542412.2:NP_542410.2:NP_542412.2
Core matrisome	Collagens	COL11A2	collagen, type XI, alpha 2	2187	1586	Weissenbacher-Zweymuller syndrome, 277610 (3)	120290	6p21.3	Connective tissue	COL11A2, STL3, DFNA13	DFNA13|DFNB53|HKE5|PARP|STL3	2187	A2AAS7:H0Y3B3:H0Y3B5:H0Y3M9:H0YHM5:H0YHM9:H0YIS1:P13942:Q4VXY6	NP_001157243.1:NP_542411.2:NP_542412.2:NP_542410.2:NP_542412.2
Core matrisome	Collagens	COL17A1	collagen, type XVII, alpha 1	2194	493	Epidermolysis bullosa, generalized atrophic benign, 226650 (3)	113811	10q24.3	Dermatological	COL17A1, BPAG2	BA16H23.2|BP180|BPAG2|FLJ60881|KIAA0204|LAD-1	2194	A2A2Y8:H0Y420:Q9UMD9	NP_000485.3
Core matrisome	Collagens	COL18A1	collagen, type XVIII, alpha 1	2195	855	Knobloch syndrome, 267750 (3)	120328	21q22.3	multiple	COL18A1, KNO	FLJ27325|FLJ34914|KNO|KNO1|MGC74745	2195	H7BXV5:H7C457:P39060	NP_085059.2:NP_569712.2
Core matrisome	Collagens	COL1A1	collagen, type I, alpha 1	2197	253	Caffey disease, 114000 (3)	120150	17q21.31-q22	Connective tissue	COL1A1	OI4	2197	I3L3H7:P02452	NP_000079.2
Core matrisome	Collagens	COL1A1	collagen, type I, alpha 1	2197	439	Dissection of cervical arteries (3)	120150	17q21.31-q22	Connective tissue	COL1A1	OI4	2197	I3L3H7:P02452	NP_000079.2
Core matrisome	Collagens	COL1A1	collagen, type I, alpha 1	2197	470	Ehlers-Danlos syndrome, type I, 130000 (3)	120150	17q21.31-q22	Connective tissue	COL1A1	OI4	2197	I3L3H7:P02452	NP_000079.2
Core matrisome	Collagens	COL1A1	collagen, type I, alpha 1	2197	470	Ehlers-Danlos syndrome, type VII, 130060 (3)	120150	17q21.31-q22	Connective tissue	COL1A1	OI4	2197	I3L3H7:P02452	NP_000079.2
Core matrisome	Collagens	COL1A1	collagen, type I, alpha 1	2197	1156	Osteogenesis imperfecta, type I, 166200 (3)	120150	17q21.31-q22	Bone	COL1A1	OI4	2197	I3L3H7:P02452	NP_000079.2
Core matrisome	Collagens	COL1A1	collagen, type I, alpha 1	2197	1156	Osteogenesis imperfecta, type II, 166210 (3)	120150	17q21.31-q22	Bone	COL1A1	OI4	2197	I3L3H7:P02452	NP_000079.2
Core matrisome	Collagens	COL1A1	collagen, type I, alpha 1	2197	1156	Osteogenesis imperfecta, type III, 259420 (3)	120150	17q21.31-q22	Bone	COL1A1	OI4	2197	I3L3H7:P02452	NP_000079.2
Core matrisome	Collagens	COL1A1	collagen, type I, alpha 1	2197	1156	Osteogenesis imperfecta, type IV, 166220 (3)	120150	17q21.31-q22	Bone	COL1A1	OI4	2197	I3L3H7:P02452	NP_000079.2
Core matrisome	Collagens	COL1A1	collagen, type I, alpha 1	2197	1163	Osteoporosis, 166710 (3)	120150	17q21.31-q22	Bone	COL1A1	OI4	2197	I3L3H7:P02452	NP_000079.2
Core matrisome	Collagens	COL1A2	collagen, type I, alpha 2	2198	470	Ehlers-Danlos syndrome, type VIIA2, 130060 (3)	120160	7q22.1	Connective tissue	COL1A2	OI4	2198	P08123	NP_000080.2
Core matrisome	Collagens	COL1A2	collagen, type I, alpha 2	2198	950	Marfan syndrome, atypical (3)	120160	7q22.1	Connective tissue	COL1A2	OI4	2198	P08123	NP_000080.2
Core matrisome	Collagens	COL1A2	collagen, type I, alpha 2	2198	1156	Osteogenesis imperfecta, 3 clinical forms, 166200, 166210, 259420 (3)	120160	7q22.1	Bone	COL1A2	OI4	2198	P08123	NP_000080.2
Core matrisome	Collagens	COL1A2	collagen, type I, alpha 2	2198	1163	Osteoporosis, idiopathic, 166710 (3)	120160	7q22.1	Bone	COL1A2	OI4	2198	P08123	NP_000080.2
Core matrisome	Collagens	COL2A1	collagen, type II, alpha 1	2200	26	Achondrogenesis-hypochondrogenesis, type II, 200610 (3)	120140	12q13.11-q13.2	Bone	COL2A1	ANFH|AOM|COL11A3|MGC131516|SEDC	2200	P02458	NP_001835.3:NP_149162.2
Core matrisome	Collagens	COL2A1	collagen, type II, alpha 1	2200	854	Kniest dysplasia, 156550 (3)	120140	12q13.11-q13.2	Skeletal	COL2A1	ANFH|AOM|COL11A3|MGC131516|SEDC	2200	P02458	NP_001835.3:NP_149162.2
Core matrisome	Collagens	COL2A1	collagen, type II, alpha 1	2200	1154	Osteoarthrosis, 165720 (3)	120140	12q13.11-q13.2	Connective tissue	COL2A1	ANFH|AOM|COL11A3|MGC131516|SEDC	2200	P02458	NP_001835.3:NP_149162.2
Core matrisome	Collagens	COL2A1	collagen, type II, alpha 1	2200	1408	SMED Strudwick type, 184250 (3)	120140	12q13.11-q13.2	Skeletal	COL2A1	ANFH|AOM|COL11A3|MGC131516|SEDC	2200	P02458	NP_001835.3:NP_149162.2
Core matrisome	Collagens	COL2A1	collagen, type II, alpha 1	2200	1447	Stickler syndrome, type I, 108300 (3)	120140	12q13.11-q13.2	multiple	COL2A1	ANFH|AOM|COL11A3|MGC131516|SEDC	2200	P02458	NP_001835.3:NP_149162.2
Core matrisome	Collagens	COL2A1	collagen, type II, alpha 1	2200	1575	Wagner syndrome, 143200 (3)	120140	12q13.11-q13.2	Ophthamological	COL2A1	ANFH|AOM|COL11A3|MGC131516|SEDC	2200	P02458	NP_001835.3:NP_149162.2
Core matrisome	Collagens	COL3A1	collagen, type III, alpha 1	2201	470	Ehlers-Danlos syndrome, type III, 130020 (3)	120180	2q31	Connective tissue	COL3A1	EDS4A|FLJ34534	2201	E7ENY8:H7C435:P02461	NP_000081.1
Core matrisome	Collagens	COL3A1	collagen, type III, alpha 1	2201	470	Ehlers-Danlos syndrome, type IV, 130050 (3)	120180	2q31	Connective tissue	COL3A1	EDS4A|FLJ34534	2201	E7ENY8:H7C435:P02461	NP_000081.1
Core matrisome	Collagens	COL3A1	collagen, type III, alpha 1	2201	2112	Aneurysm, familial arterial (3)	120180	2q31	Unclassified	COL3A1	EDS4A|FLJ34534	2201	E7ENY8:H7C435:P02461	NP_000081.1
Core matrisome	Collagens	COL4A1	collagen, type IV, alpha 1	2202	1247	Porencephaly, 175780 (3)	120130	13q34	Neurological	COL4A1	arresten	2202	F5H5K0:P02462	NP_001836.2
Core matrisome	Collagens	COL4A3	collagen, type IV, alpha 3 (Goodpasture antigen)	2204	94	Alport syndrome, autosomal recessive, 203780 (3)	120070	2q36-q37	Renal	COL4A3	-	2204	H7BXM4:Q01955	NP_000082.2
Core matrisome	Collagens	COL4A4	collagen, type IV, alpha 4	2206	94	Alport syndrome, autosomal recessive, 203780 (3)	120131	2q36-q37	Renal	COL4A4	CA44	2206	J3KNM7:P53420	NP_000083.3:XP_005246338.1
Core matrisome	Collagens	COL4A4	collagen, type IV, alpha 4	2206	653	Hematuria, familial benign (3)	120131	2q36-q37	Renal	COL4A4	CA44	2206	J3KNM7:P53420	NP_000083.3:XP_005246338.1
Core matrisome	Collagens	COL4A5	collagen, type IV, alpha 5	2207	94	Alport syndrome, 301050 (3)	303630	Xq22.3	Renal	COL4A5, ATS, ASLN	ASLN|ATS|CA54|MGC167109|MGC42377	2207	H0Y998:H0Y9H0:H0Y9R8:P29400	NP_000486.1:NP_203699.1:XP_006724679.1
Core matrisome	Collagens	COL4A6	collagen, type IV, alpha 6	2208	878	Leiomyomatosis, diffuse, with Alport syndrome, 308940 (3)	303631	Xq22.3	Cancer	COL4A6	MGC88184	2208	A8MXH5:B4DZ39:F5H3Q5:F5H851:Q14031	NP_001274688.1:NP_001274689.1:NP_001274689.1:NP_001838.2:NP_378667.1
Core matrisome	Collagens	COL5A1	collagen, type V, alpha 1	2209	470	Ehlers-Danlos syndrome, type I, 130000 (3)	120215	9q34.2-q34.3	Connective tissue	COL5A1	-	2209	H7BY82:P20908	NP_000084.3
Core matrisome	Collagens	COL5A1	collagen, type V, alpha 1	2209	470	Ehlers-Danlos syndrome, type II, 130010 (3)	120215	9q34.2-q34.3	Connective tissue	COL5A1	-	2209	H7BY82:P20908	NP_000084.3
Core matrisome	Collagens	COL5A2	collagen, type V, alpha 2	2210	470	Ehlers-Danlos syndrome, type I, 130000 (3)	120190	2q31	Connective tissue	COL5A2	MGC105115	2210	P05997	NP_000384.2
Core matrisome	Collagens	COL6A1	collagen, type VI, alpha 1	2211	200	Bethlem myopathy, 158810 (3)	120220	21q22.3	Muscular	COL6A1, OPLL	OPLL	2211	P12109	NP_001839.2
Core matrisome	Collagens	COL6A1	collagen, type VI, alpha 1	2211	1542	Ullrich congenital muscular dystrophy, 254090 (3)	120220	21q22.3	Muscular	COL6A1, OPLL	OPLL	2211	P12109	NP_001839.2
Core matrisome	Collagens	COL6A2	collagen, type VI, alpha 2	2212	200	Bethlem myopathy, 158810 (3)	120240	21q22.3	Muscular	COL6A2	DKFZp586E1322|FLJ46862|PP3610	2212	C9JH44:H7C0M5:P12110	NP_001840.3:NP_478054.2:NP_478055.2
Core matrisome	Collagens	COL6A2	collagen, type VI, alpha 2	2212	1542	Ullrich scleroatonic muscular dystrophy, 254090 (3)	120240	21q22.3	Muscular	COL6A2	DKFZp586E1322|FLJ46862|PP3610	2212	C9JH44:H7C0M5:P12110	NP_001840.3:NP_478054.2:NP_478055.2
Core matrisome	Collagens	COL6A3	collagen, type VI, alpha 3	2213	200	Bethlem myopathy, 158810 (3)	120250	2q37	Muscular	COL6A3	DKFZp686D23123|DKFZp686K04147|DKFZp686N0262|FLJ347	2213	C9JNG9:E7ENL6:E9PCV6:I3L392:P12111	NP_004360.2:NP_476505.3:NP_476506.3:NP_476507.3:NP_476508.2:XP_005246122.1
Core matrisome	Collagens	COL6A3	collagen, type VI, alpha 3	2213	1542	Ullrich congenital muscular dystrophy, 254090 (3)	120250	2q37	Muscular	COL6A3	DKFZp686D23123|DKFZp686K04147|DKFZp686N0262|FLJ347	2213	C9JNG9:E7ENL6:E9PCV6:I3L392:P12111	NP_004360.2:NP_476505.3:NP_476506.3:NP_476507.3:NP_476508.2:XP_005246122.1
Core matrisome	Collagens	COL7A1	collagen, type VII, alpha 1	2214	465	EBD, Bart type, 132000 (3)	120120	3p21.3	Dermatological	COL7A1	EBD1|EBDCT|EBR1	2214	C9JBL3:Q02388	NP_000085.1
Core matrisome	Collagens	COL7A1	collagen, type VII, alpha 1	2214	465	EBD, localisata variant (3)	120120	3p21.3	Dermatological	COL7A1	EBD1|EBDCT|EBR1	2214	C9JBL3:Q02388	NP_000085.1
Core matrisome	Collagens	COL7A1	collagen, type VII, alpha 1	2214	493	Epidermolysis bullosa dystrophica, AD, 131750 (3)	120120	3p21.3	Dermatological	COL7A1	EBD1|EBDCT|EBR1	2214	C9JBL3:Q02388	NP_000085.1
Core matrisome	Collagens	COL7A1	collagen, type VII, alpha 1	2214	493	Epidermolysis bullosa dystrophica, AR, 226600 (3)	120120	3p21.3	Dermatological	COL7A1	EBD1|EBDCT|EBR1	2214	C9JBL3:Q02388	NP_000085.1
Core matrisome	Collagens	COL7A1	collagen, type VII, alpha 1	2214	493	Epidermolysis bullosa, pretibial, 131850 (3)	120120	3p21.3	Dermatological	COL7A1	EBD1|EBDCT|EBR1	2214	C9JBL3:Q02388	NP_000085.1
Core matrisome	Collagens	COL7A1	collagen, type VII, alpha 1	2214	493	Epidermolysis bullosa pruriginosa, 604129 (3)	120120	3p21.3	Dermatological	COL7A1	EBD1|EBDCT|EBR1	2214	C9JBL3:Q02388	NP_000085.1
Core matrisome	Collagens	COL7A1	collagen, type VII, alpha 1	2214	1510	Toenail dystrophy, isolated, 607523 (3)	120120	3p21.3	Dermatological	COL7A1	EBD1|EBDCT|EBR1	2214	C9JBL3:Q02388	NP_000085.1
Core matrisome	Collagens	COL7A1	collagen, type VII, alpha 1	2214	1518	Transient bullous of the newborn, 131705 (3)	120120	3p21.3	Dermatological	COL7A1	EBD1|EBDCT|EBR1	2214	C9JBL3:Q02388	NP_000085.1
Core matrisome	Collagens	COL8A2	collagen, type VIII, alpha 2	2216	362	Corneal dystrophy, hereditary polymorphous posterior, 2, 122000 (3)	120252	1p34.3-p32.3	Ophthamological	COL8A2, FECD, PPCD2	FECD|FECD1|FLJ00201|MGC116970|MGC116972|PPCD|PPCD2	2216	E9PP49:P25067	NP_005193.1:XP_005270535.1:XP_005270536.1
Core matrisome	Collagens	COL8A2	collagen, type VIII, alpha 2	2216	558	Fuchs endothelial corneal dystrophy, 136800 (3)	120252	1p34.3-p32.3	Ophthamological	COL8A2, FECD, PPCD2	FECD|FECD1|FLJ00201|MGC116970|MGC116972|PPCD|PPCD2	2216	E9PP49:P25067	NP_005193.1:XP_005270535.1:XP_005270536.1
Core matrisome	Collagens	COL9A1	collagen, type IX, alpha 1	2217	496	Epiphyseal dysplasia, multiple, COL9A1-related (3)	120210	6q13	Bone	COL9A1, MED	DJ149L1.1.2|EDM6|FLJ40263|MED	2217	A6NEQ6:P20849	NP_001842.3:NP_511040.2
Core matrisome	Collagens	COL9A2	collagen, type IX, alpha 2	2218	496	Epiphyseal dysplasia, multiple, type 2, 600204 (3)	120260	1p33-p32.2	Bone	COL9A2, EDM2	DJ39G22.4|EDM2|MED	2218	B1AKJ1:B1AKJ3:H0Y409:Q14055	NP_001843.1:XP_006710428.1
Core matrisome	Collagens	COL9A2	collagen, type IX, alpha 2	2218	817	Intervertebral disc disease, susceptibility to, 603932 (3)	120260	1p33-p32.2	Neurological	COL9A2, EDM2	DJ39G22.4|EDM2|MED	2218	B1AKJ1:B1AKJ3:H0Y409:Q14055	NP_001843.1:XP_006710428.1
Core matrisome	Collagens	COL9A3	collagen, type IX, alpha 3	2219	496	Epiphyseal dysplasia, multiple, 3, 600969 (3)	120270	20q13.3	Bone	COL9A3, EDM3, IDD	DJ885L7.4.1|EDM3|FLJ90759|IDD|MED	2219	Q14050:Q4VXW1	NP_001844.3
Core matrisome	Collagens	COL9A3	collagen, type IX, alpha 3	2219	496	Epiphyseal dysplasia, multiple, with myopathy (3)	120270	20q13.3	Bone	COL9A3, EDM3, IDD	DJ885L7.4.1|EDM3|FLJ90759|IDD|MED	2219	Q14050:Q4VXW1	NP_001844.3
Core matrisome	Collagens	COL9A3	collagen, type IX, alpha 3	2219	817	Intervertebral disc disease, susceptibility to, 603932 (3)	120270	20q13.3	Neurological	COL9A3, EDM3, IDD	DJ885L7.4.1|EDM3|FLJ90759|IDD|MED	2219	Q14050:Q4VXW1	NP_001844.3
Core matrisome	ECM Glycoproteins	AMELX	amelogenin (amelogenesis imperfecta 1, X-linked)	461	99	Amelogenesis imperfecta, 301200 (3)	300391	Xp22.3-p22.1	Bone	AMELX, AMG, AIH1, AMGX	AIH1|ALGN|AMG|AMGL|AMGX	461	Q99217	NP_001133.1:NP_872621.1:NP_872622.1
Core matrisome	ECM Glycoproteins	CILP	cartilage intermediate layer protein, nucleotide pyrophosphohydrolase	1980	917	Lumbar disc disease, susceptibility to, 603932 (3)	603489	15q22	Skeletal	CILP	CILP-1|HsT18872	1980	O75339	NP_003604.3
Core matrisome	ECM Glycoproteins	COCH	coagulation factor C homolog, cochlin (Limulus polyphemus)	2180	406	Deafness, autosomal dominant 9, 601369 (3)	603196	14q12-q13	Ear,Nose,Throat	COCH, DFNA9	COCH-5B2|COCH5B2|DFNA9	2180	E7EN67:G3V4C4:G3V5G6:G3V5V4:G3V5X3:H0YJJ0:H0YJW4:O43405:Q96IU6	NP_001128530.1:NP_004077.1:XP_006720136.1
Core matrisome	ECM Glycoproteins	COCH	coagulation factor C homolog, cochlin (Limulus polyphemus)	2180	985	Meniere disease 156000 (3) ()	603196	14q12-q13	Neurological	COCH, DFNA9	COCH-5B2|COCH5B2|DFNA9	2180	E7EN67:G3V4C4:G3V5G6:G3V5V4:G3V5X3:H0YJJ0:H0YJW4:O43405:Q96IU6	NP_001128530.1:NP_004077.1:XP_006720136.1
Core matrisome	ECM Glycoproteins	COLQ	collagen-like tail subunit (single strand of homotrimer) of asymmetric acetylcholinesterase	2226	482	Endplate acetylcholinesterase deficiency, 603034 (3)	603033	3p25	Neurological	COLQ, EAD	EAD|FLJ55041	2226	C9JBB2:F8WA67:Q9Y215:S4R408	NP_005668.2:NP_536799.1:NP_536800.2
Core matrisome	ECM Glycoproteins	COMP	cartilage oligomeric matrix protein	2227	496	Epiphyseal dysplasia, multiple 1, 132400 (3)	600310	19p13.1	Bone	COMP, EDM1, MED, PSACH	EDM1|EPD1|MED|MGC131819|MGC149768|PSACH|THBS5	2227	B4DKJ3:G3XAP6:P49747	NP_000086.2
Core matrisome	ECM Glycoproteins	COMP	cartilage oligomeric matrix protein	2227	1278	Pseudoachondroplasia, 177170 (3)	600310	19p13.1	Skeletal	COMP, EDM1, MED, PSACH	EDM1|EPD1|MED|MGC131819|MGC149768|PSACH|THBS5	2227	B4DKJ3:G3XAP6:P49747	NP_000086.2
Core matrisome	ECM Glycoproteins	CRELD1	cysteine-rich with EGF-like domains 1	14630	168	Atrioventricular septal defect, partial, with heterotaxy syndrome, 606217 (3)	607170	3p25.3	Cardiovascular	CRELD1, AVSD2	AVSD2|CIRRIN|DKFZp566D213	14630	F8WBY3:H7C2L3:Q96HD1	NP_001026887.1:NP_001070883.1:NP_056328.2:XP_006713391.1
Core matrisome	ECM Glycoproteins	CRELD1	cysteine-rich with EGF-like domains 1	14630	168	Atrioventricular septal defect, susceptibility to, 2, 606217 (3)	607170	3p25.3	Cardiovascular	CRELD1, AVSD2	AVSD2|CIRRIN|DKFZp566D213	14630	F8WBY3:H7C2L3:Q96HD1	NP_001026887.1:NP_001070883.1:NP_056328.2:XP_006713391.1
Core matrisome	ECM Glycoproteins	DMBT1	deleted in malignant brain tumors 1	2926	590	Glioblastoma multiforme, somatic, 137800 (3)	601969	10q25.3-q26.1	Cancer	DMBT1	FLJ61058|GP340|MGC164738|muclin	2926	Q9UGM3	NP_004397.2:NP_015568.2:NP_060049.2
Core matrisome	ECM Glycoproteins	DSPP	dentin sialophosphoprotein	3054	406	Deafness, autosomal dominant 36, with dentinogenesis, 605594 (3)	125485	4q21.3	Ear,Nose,Throat	DSPP, DPP, DGI1, DFNA39, DTDP2	DFNA39|DGI1|DMP3|DPP|DSP|DTDP2	3054	Q9NZW4	NP_055023.2
Core matrisome	ECM Glycoproteins	DSPP	dentin sialophosphoprotein	3054	417	Dentin dysplasia, type II, 125420 (3)	125485	4q21.3	Bone	DSPP, DPP, DGI1, DFNA39, DTDP2	DFNA39|DGI1|DMP3|DPP|DSP|DTDP2	3054	Q9NZW4	NP_055023.2
Core matrisome	ECM Glycoproteins	DSPP	dentin sialophosphoprotein	3054	418	Dentinogenesis imperfecta, Shields type II, 125490 (3)	125485	4q21.3	Bone	DSPP, DPP, DGI1, DFNA39, DTDP2	DFNA39|DGI1|DMP3|DPP|DSP|DTDP2	3054	Q9NZW4	NP_055023.2
Core matrisome	ECM Glycoproteins	DSPP	dentin sialophosphoprotein	3054	418	Dentinogenesis imperfecta, Shields type III, 125500 (3)	125485	4q21.3	Bone	DSPP, DPP, DGI1, DFNA39, DTDP2	DFNA39|DGI1|DMP3|DPP|DSP|DTDP2	3054	Q9NZW4	NP_055023.2
Core matrisome	ECM Glycoproteins	ECM1	extracellular matrix protein 1	3153	2903	Lipoid proteinosis, 247100 (3)	602201	1q21	Metabolic	ECM1	-	3153	Q16610	NP_001189787.1:NP_004416.2:NP_073155.2
Core matrisome	ECM Glycoproteins	EFEMP1	EGF-containing fibulin-like extracellular matrix protein 1	3218	446	Doyne honeycomb degeneration of retina, 126600 (3)	601548	2p16	Ophthamological	EFEMP1, FBNL, DHRD	DHRD|DRAD|FBLN3|FBNL|FLJ35535|MGC111353|MLVT|MTLV|	3218	C9J4H7:C9J4J8:C9J8S9:C9JPZ9:C9JQX7:C9JUM4:Q12805:Q580Q6	NP_001034437.1:NP_001034438.1
Core matrisome	ECM Glycoproteins	ELN	elastin	3327	395	Cutis laxa, AD, 123700 (3)	130160	7q11.2	Connective tissue	ELN	FLJ38671|FLJ43523|SVAS|WBS|WS	3327	E7EN51:E7EN65:E7ENM0:E7ENW7:E7EP82:E7EQH8:E7ETP7:E7EWS8:E9PGX4:F8WAH6:G3V0G6:G5E950:H7C3K0:P15502	NP_000492.2:NP_001075221.1:NP_001075222.1:NP_001075223.1:NP_001075224.1:NP_001265844.1:NP_001265845.1:NP_001265841.1:NP_001265842.1:NP_001265843.1:NP_001265846.1
Core matrisome	ECM Glycoproteins	ELN	elastin	3327	1463	Supravalvar aortic stenosis, 185500 (3)	130160	7q11.2	Cardiovascular	ELN	FLJ38671|FLJ43523|SVAS|WBS|WS	3327	E7EN51:E7EN65:E7ENM0:E7ENW7:E7EP82:E7EQH8:E7ETP7:E7EWS8:E9PGX4:F8WAH6:G3V0G6:G5E950:H7C3K0:P15502	NP_000492.2:NP_001075221.1:NP_001075222.1:NP_001075223.1:NP_001075224.1:NP_001265844.1:NP_001265845.1:NP_001265841.1:NP_001265842.1:NP_001265843.1:NP_001265846.1
Core matrisome	ECM Glycoproteins	ELN	elastin	3327	1594	Williams-Beuren syndrome, 194050 (3)	130160	7q11.2	multiple	ELN	FLJ38671|FLJ43523|SVAS|WBS|WS	3327	E7EN51:E7EN65:E7ENM0:E7ENW7:E7EP82:E7EQH8:E7ETP7:E7EWS8:E9PGX4:F8WAH6:G3V0G6:G5E950:H7C3K0:P15502	NP_000492.2:NP_001075221.1:NP_001075222.1:NP_001075223.1:NP_001075224.1:NP_001265844.1:NP_001265845.1:NP_001265841.1:NP_001265842.1:NP_001265843.1:NP_001265846.1
Core matrisome	ECM Glycoproteins	FBLN1	fibulin 1	3600	1470	Synpolydactyly, 3/3'4, associated with metacarpal and metatarsal synostoses, 608180	135820	22q13.3	Skeletal	FBLN1	FBLN|FIBL1	3600	B1AHL2:B1AHM4:B1AHM5:B1AHM6:B1AHM7:B1AHM8:B1AHM9:B1AHN3:F8W7M9:H7C1M6:P23142	NP_001987.2:NP_006476.2:NP_006477.2:NP_006478.2
Core matrisome	ECM Glycoproteins	FBLN5	fibulin 5	3602	395	Cutis laxa, autosomal dominant, 123700 (3)	604580	14q32.1	Connective tissue	FBLN5, ARMD3	ARMD3|DANCE|EVEC|FIBL-5|FLJ90059|UP50	3602	G3V2P8:G3V329:G3V3Y2:G3V4U0:G3XA98:H0YJ31:Q9UBX5	NP_006320.2
Core matrisome	ECM Glycoproteins	FBLN5	fibulin 5	3602	395	Cutis laxa, autosomal recessive, 219100 (3)	604580	14q32.1	Connective tissue	FBLN5, ARMD3	ARMD3|DANCE|EVEC|FIBL-5|FLJ90059|UP50	3602	G3V2P8:G3V329:G3V3Y2:G3V4U0:G3XA98:H0YJ31:Q9UBX5	NP_006320.2
Core matrisome	ECM Glycoproteins	FBLN5	fibulin 5	3602	937	Macular degeneration, age-related, 3, 608895 (3)	604580	14q32.1	Ophthamological	FBLN5, ARMD3	ARMD3|DANCE|EVEC|FIBL-5|FLJ90059|UP50	3602	G3V2P8:G3V329:G3V3Y2:G3V4U0:G3XA98:H0YJ31:Q9UBX5	NP_006320.2
Core matrisome	ECM Glycoproteins	FBN1	fibrillin 1	3603	130	Aortic aneurysm, ascending, and dissection (3)	134797	15q21.1	Cardiovascular	FBN1, MFS1, WMS	FBN|MASS|MFS1|OCTD|SGS|WMS	3603	F6U495:H0YN80:H0YND0:P35555	NP_000129.3
Core matrisome	ECM Glycoproteins	FBN1	fibrillin 1	3603	467	Ectopia lentis, familial, 129600 (3)	134797	15q21.1	Ophthamological	FBN1, MFS1, WMS	FBN|MASS|MFS1|OCTD|SGS|WMS	3603	F6U495:H0YN80:H0YND0:P35555	NP_000129.3
Core matrisome	ECM Glycoproteins	FBN1	fibrillin 1	3603	950	Marfan syndrome, 154700 (3)	134797	15q21.1	Connective tissue	FBN1, MFS1, WMS	FBN|MASS|MFS1|OCTD|SGS|WMS	3603	F6U495:H0YN80:H0YND0:P35555	NP_000129.3
Core matrisome	ECM Glycoproteins	FBN1	fibrillin 1	3603	957	MASS syndrome, 604308 (3)	134797	15q21.1	Connective tissue	FBN1, MFS1, WMS	FBN|MASS|MFS1|OCTD|SGS|WMS	3603	F6U495:H0YN80:H0YND0:P35555	NP_000129.3
Core matrisome	ECM Glycoproteins	FBN1	fibrillin 1	3603	1388	Shprintzen-Goldberg syndrome, 182212 (3)	134797	15q21.1	multiple	FBN1, MFS1, WMS	FBN|MASS|MFS1|OCTD|SGS|WMS	3603	F6U495:H0YN80:H0YND0:P35555	NP_000129.3
Core matrisome	ECM Glycoproteins	FBN1	fibrillin 1	3603	1585	Weill-Marchesani syndrome, dominant, 608328 (3)	134797	15q21.1	Connective tissue	FBN1, MFS1, WMS	FBN|MASS|MFS1|OCTD|SGS|WMS	3603	F6U495:H0YN80:H0YND0:P35555	NP_000129.3
Core matrisome	ECM Glycoproteins	FBN2	fibrillin 2	3604	358	Contractural arachnodactyly, congenital (3)	121050	5q23-q31	Connective tissue	FBN2, CCA	CCA|DA9	3604	D6REJ2:D6RJI3:E9PHW4:P35556	NP_001990.2
Core matrisome	ECM Glycoproteins	FGA	fibrinogen alpha chain	3661	61	Afibrinogenemia, 202400 (3)	134820	4q28	Hematological	FGA	Fib2|MGC119422|MGC119423|MGC119425	3661	P02671	NP_000499.1:NP_068657.1
Core matrisome	ECM Glycoproteins	FGA	fibrinogen alpha chain	3661	103	Amyloidosis, hereditary renal, 105200 (3)	134820	4q28	Neurological	FGA	Fib2|MGC119422|MGC119423|MGC119425	3661	P02671	NP_000499.1:NP_068657.1
Core matrisome	ECM Glycoproteins	FGA	fibrinogen alpha chain	3661	457	Dysfibrinogenemia, alpha type, causing bleeding diathesis (3)	134820	4q28	Hematological	FGA	Fib2|MGC119422|MGC119423|MGC119425	3661	P02671	NP_000499.1:NP_068657.1
Core matrisome	ECM Glycoproteins	FGA	fibrinogen alpha chain	3661	457	Dysfibrinogenemia, alpha type, causing recurrent thrombosis (3)	134820	4q28	Hematological	FGA	Fib2|MGC119422|MGC119423|MGC119425	3661	P02671	NP_000499.1:NP_068657.1
Core matrisome	ECM Glycoproteins	FGB	fibrinogen beta chain	3662	61	Afibrinogenemia, congenital, 202400 (3)	134830	4q28	Hematological	FGB	MGC104327|MGC120405	3662	D6REL8:F8W6P4:P02675	NP_001171670.1:NP_005132.2
Core matrisome	ECM Glycoproteins	FGB	fibrinogen beta chain	3662	457	Dysfibrinogenemia, beta type (3)	134830	4q28	Hematological	FGB	MGC104327|MGC120405	3662	D6REL8:F8W6P4:P02675	NP_001171670.1:NP_005132.2
Core matrisome	ECM Glycoproteins	FGB	fibrinogen beta chain	3662	1497	Thrombophilia, dysfibrinogenemic (3)	134830	4q28	Hematological	FGB	MGC104327|MGC120405	3662	D6REL8:F8W6P4:P02675	NP_001171670.1:NP_005132.2
Core matrisome	ECM Glycoproteins	FGG	fibrinogen gamma chain	3694	457	Dysfibrinogenemia, gamma type (3)	134850	4q28	Hematological	FGG	-	3694	C9JC84:C9JEU5:C9JPQ9:C9JU00:P02679	NP_000500.2:NP_068656.2
Core matrisome	ECM Glycoproteins	FGG	fibrinogen gamma chain	3694	770	Hypofibrinogenemia, gamma type (3)	134850	4q28	Hematological	FGG	-	3694	C9JC84:C9JEU5:C9JPQ9:C9JU00:P02679	NP_000500.2:NP_068656.2
Core matrisome	ECM Glycoproteins	FGG	fibrinogen gamma chain	3694	1497	Thrombophilia, dysfibrinogenemic (3)	134850	4q28	Hematological	FGG	-	3694	C9JC84:C9JEU5:C9JPQ9:C9JU00:P02679	NP_000500.2:NP_068656.2
Core matrisome	ECM Glycoproteins	FRAS1	Fraser syndrome 1	19185	551	Fraser syndrome, 219000 (3)	607830	4q21	multiple	FRAS1	DKFZp686I05113|DKFZp686P08111|FLJ14927|FLJ22031|KI	19185	D6RCP6:H0Y8V2:H0Y930:H0Y9A6:H0Y9C9:Q86XX4	NP_001159605.1:NP_079350.5
Core matrisome	ECM Glycoproteins	HMCN1	hemicentin 1	19194	937	Macular degeneration, age-related, 1, 603075 (3)	608548	1q24-q25	Ophthamological	HMCN1, FBLN6, FIBL6	ARMD1|FBLN6|FIBL-6|FIBL6	19194	Q5TCP6:Q96RW7	NP_114141.2
Core matrisome	ECM Glycoproteins	IGFALS	insulin-like growth factor binding protein, acid labile subunit	5468	30	Acid-labile subunit, deficiency of (3)	601489	16p13.3	Endocrine	IGFALS, ALS	ALS	5468	H3BSX8:P35858	NP_001139478.1:NP_004961.1
Core matrisome	ECM Glycoproteins	KAL1	Kallmann syndrome 1 sequence	6211	836	Kallmann syndrome (3)	308700	Xp22.3	multiple	KAL1, KMS, ADMLX	ADMLX|HHA|KAL|KALIG-1|KMS	6211	P23352	NP_000207.2
Core matrisome	ECM Glycoproteins	LAMA2	laminin, alpha 2	6482	1040	Muscular dystrophy, congenital, due to partial LAMA2 deficiency, 607855 (3)	156225	6q22-q23	Muscular	LAMA2, LAMM	LAMM	6482	P24043	NP_000417.2:NP_001073291.1
Core matrisome	ECM Glycoproteins	LAMA2	laminin, alpha 2	6482	1040	Muscular dystrophy, congenital merosin-deficient, 607855 (3)	156225	6q22-q23	Muscular	LAMA2, LAMM	LAMM	6482	P24043	NP_000417.2:NP_001073291.1
Core matrisome	ECM Glycoproteins	LAMA3	laminin, alpha 3	6483	493	Epidermolysis bullosa, generalized atrophic benign, 226650 (3)	600805	18q11.2	Dermatological	LAMA3, LOCS	BM600|E170|LAMNA|LOCS|lama3a	6483	K7EIP4:K7EMU9:K7EPP3:K7EQ42:K7ERM0:Q16787	NP_000218.2:NP_001121189.1:NP_001121190.1:NP_937762.1
Core matrisome	ECM Glycoproteins	LAMA3	laminin, alpha 3	6483	493	Epidermolysis bullosa, junctional, Herlitz type, 226700 (3)	600805	18q11.2	Dermatological	LAMA3, LOCS	BM600|E170|LAMNA|LOCS|lama3a	6483	K7EIP4:K7EMU9:K7EPP3:K7EQ42:K7ERM0:Q16787	NP_000218.2:NP_001121189.1:NP_001121190.1:NP_937762.1
Core matrisome	ECM Glycoproteins	LAMA3	laminin, alpha 3	6483	868	Laryngoonychocutaneous syndrome, 245660 (3)	600805	18q11.2	multiple	LAMA3, LOCS	BM600|E170|LAMNA|LOCS|lama3a	6483	K7EIP4:K7EMU9:K7EPP3:K7EQ42:K7ERM0:Q16787	NP_000218.2:NP_001121189.1:NP_001121190.1:NP_937762.1
Core matrisome	ECM Glycoproteins	LAMB2	laminin, beta 2 (laminin S)	6487	1009	Microcoria-congenital nephrosis syndrome, 609049 (3)	150325	3p21	Ophthamological	LAMB2, LAMS	LAMS	6487	F5H520:P55268	NP_002283.3:XP_005265184.1
Core matrisome	ECM Glycoproteins	LAMB3	laminin, beta 3	6490	493	Epidermolysis bullosa, generalized atrophic benign, 226650 (3)	150310	1q32	Dermatological	LAMB3	BM600-125KDA|FLJ99565|LAM5|LAMNB1	6490	Q13751:Q5THA1:X1WI29	NP_000219.2:NP_001017402.1:NP_001121113.1:XP_005273181.1
Core matrisome	ECM Glycoproteins	LAMB3	laminin, beta 3	6490	493	Epidermolysis bullosa, Herlitz junctional type, 226700 (3)	150310	1q32	Dermatological	LAMB3	BM600-125KDA|FLJ99565|LAM5|LAMNB1	6490	Q13751:Q5THA1:X1WI29	NP_000219.2:NP_001017402.1:NP_001121113.1:XP_005273181.1
Core matrisome	ECM Glycoproteins	LAMC2	laminin, gamma 2	6493	493	Epidermolysis bullosa, generalized atrophic benign, 226650 (3)	150292	1q25-q31	Dermatological	LAMC2, LAMNB2, LAMB2T	B2T|BM600|CSF|EBR2|EBR2A|LAMB2T|LAMNB2|MGC138491|M	6493	Q13753	NP_005553.2:NP_061486.2
Core matrisome	ECM Glycoproteins	LAMC2	laminin, gamma 2	6493	493	Epidermolysis bullosa, Herlitz junctional type, 226700 (3)	150292	1q25-q31	Dermatological	LAMC2, LAMNB2, LAMB2T	B2T|BM600|CSF|EBR2|EBR2A|LAMB2T|LAMNB2|MGC138491|M	6493	Q13753	NP_005553.2:NP_061486.2
Core matrisome	ECM Glycoproteins	LGI1	leucine-rich, glioma inactivated 1	6572	495	Epilepsy, partial, with auditory features, 600512 (3)	604619	10q24	Neurological	LGI1, EPT, ETL1	EPITEMPIN|EPT|ETL1|IB1099	6572	O95970	NP_005088.1:XP_005270329.1
Core matrisome	ECM Glycoproteins	LGI1	leucine-rich, glioma inactivated 1	6572	590	Glioblastoma, somatic, 137800 (3)	604619	10q24	Cancer	LGI1, EPT, ETL1	EPITEMPIN|EPT|ETL1|IB1099	6572	O95970	NP_005088.1:XP_005270329.1
Core matrisome	ECM Glycoproteins	MATN3	matrilin 3	6909	496	Epiphyseal dysplasia, multiple, 5, 607078 (3)	602109	2p24-p23	Bone	MATN3, EDM5, HOA	DIPOA|EDM5|HOA|OADIP|OS2	6909	O15232	NP_002372.1
Core matrisome	ECM Glycoproteins	MATN3	matrilin 3	6909	1154	Osteoarthritis, hand, susceptibility to, 607850 (3)	602109	2p24-p23	Connective tissue	MATN3, EDM5, HOA	DIPOA|EDM5|HOA|OADIP|OS2	6909	O15232	NP_002372.1
Core matrisome	ECM Glycoproteins	MATN3	matrilin 3	6909	1435	Spondyloepimetaphyseal dysplasia, 608728 (3)	602109	2p24-p23	Skeletal	MATN3, EDM5, HOA	DIPOA|EDM5|HOA|OADIP|OS2	6909	O15232	NP_002372.1
Core matrisome	ECM Glycoproteins	MGP	matrix Gla protein	7060	849	Keutel syndrome, 245150 (3)	154870	12p13.1-p12.3	multiple	MGP, NTI	GIG36|MGLAP|NTI	7060	H0YGZ6:P08493	NP_000891.2:NP_001177768.1
Core matrisome	ECM Glycoproteins	RELN	reelin	9957	908	Lissencephaly syndrome, Norman-Roberts type, 257320 (3)	600514	7q22	Neurological	RELN, RL	PRO1598|RL	9957	H7C2B0:J3KQ66:P78509	NP_005036.2:NP_774959.1
Core matrisome	ECM Glycoproteins	TECTA	tectorin alpha	11720	406	Deafness, autosomal dominant 12, 601842 (3)	602574	11q22-q24	Ear,Nose,Throat	TECTA, DFNA8, DFNA12, DFNB21	DFNA12|DFNA8|DFNB21	11720	O75443	NP_005413.2
Core matrisome	ECM Glycoproteins	TECTA	tectorin alpha	11720	406	Deafness, autosomal dominant 8, 601543 (3)	602574	11q22-q24	Ear,Nose,Throat	TECTA, DFNA8, DFNA12, DFNB21	DFNA12|DFNA8|DFNB21	11720	O75443	NP_005413.2
Core matrisome	ECM Glycoproteins	TECTA	tectorin alpha	11720	406	Deafness, autosomal recessive 21, 603629 (3)	602574	11q22-q24	Ear,Nose,Throat	TECTA, DFNA8, DFNA12, DFNB21	DFNA12|DFNA8|DFNB21	11720	O75443	NP_005413.2
Core matrisome	ECM Glycoproteins	TGFBI	transforming growth factor, beta-induced, 68kDa	11771	362	Corneal dystrophy, Avellino type, 607541 (3)	601692	5q31	Ophthamological	TGFBI, CSD2, CDGG1, CSD, BIGH3,	BIGH3|CDB1|CDG2|CDGG1|CSD|CSD1|CSD2|CSD3|EBMD|LCD1	11771	D6RBX4:G8JLA8:H0Y8L3:H0Y8M8:H0Y9D7:H0YAB8:H0YAH8:Q15582:S4R3C6	NP_000349.1
Core matrisome	ECM Glycoproteins	TGFBI	transforming growth factor, beta-induced, 68kDa	11771	362	Corneal dystrophy, Groenouw type I, 121900 (3)	601692	5q31	Ophthamological	TGFBI, CSD2, CDGG1, CSD, BIGH3,	BIGH3|CDB1|CDG2|CDGG1|CSD|CSD1|CSD2|CSD3|EBMD|LCD1	11771	D6RBX4:G8JLA8:H0Y8L3:H0Y8M8:H0Y9D7:H0YAB8:H0YAH8:Q15582:S4R3C6	NP_000349.1
Core matrisome	ECM Glycoproteins	TGFBI	transforming growth factor, beta-induced, 68kDa	11771	362	Corneal dystrophy, lattice type I, 122200 (3)	601692	5q31	Ophthamological	TGFBI, CSD2, CDGG1, CSD, BIGH3,	BIGH3|CDB1|CDG2|CDGG1|CSD|CSD1|CSD2|CSD3|EBMD|LCD1	11771	D6RBX4:G8JLA8:H0Y8L3:H0Y8M8:H0Y9D7:H0YAB8:H0YAH8:Q15582:S4R3C6	NP_000349.1
Core matrisome	ECM Glycoproteins	TGFBI	transforming growth factor, beta-induced, 68kDa	11771	362	Corneal dystrophy, lattice type IIIA, 608471 (3)	601692	5q31	Ophthamological	TGFBI, CSD2, CDGG1, CSD, BIGH3,	BIGH3|CDB1|CDG2|CDGG1|CSD|CSD1|CSD2|CSD3|EBMD|LCD1	11771	D6RBX4:G8JLA8:H0Y8L3:H0Y8M8:H0Y9D7:H0YAB8:H0YAH8:Q15582:S4R3C6	NP_000349.1
Core matrisome	ECM Glycoproteins	TGFBI	transforming growth factor, beta-induced, 68kDa	11771	362	Corneal dystrophy, Reis-Bucklers type, 608470 (3)	601692	5q31	Ophthamological	TGFBI, CSD2, CDGG1, CSD, BIGH3,	BIGH3|CDB1|CDG2|CDGG1|CSD|CSD1|CSD2|CSD3|EBMD|LCD1	11771	D6RBX4:G8JLA8:H0Y8L3:H0Y8M8:H0Y9D7:H0YAB8:H0YAH8:Q15582:S4R3C6	NP_000349.1
Core matrisome	ECM Glycoproteins	TGFBI	transforming growth factor, beta-induced, 68kDa	11771	362	Corneal dystrophy, Thiel-Behnke type, 602082 (3)	601692	5q31	Ophthamological	TGFBI, CSD2, CDGG1, CSD, BIGH3,	BIGH3|CDB1|CDG2|CDGG1|CSD|CSD1|CSD2|CSD3|EBMD|LCD1	11771	D6RBX4:G8JLA8:H0Y8L3:H0Y8M8:H0Y9D7:H0YAB8:H0YAH8:Q15582:S4R3C6	NP_000349.1
Core matrisome	ECM Glycoproteins	TNXB	tenascin XB	11976	470	Ehlers-Danlos due to tenascin X deficiency, 606408 (3)	600985	6p21.3	Connective tissue	TNXB, TNX, TNXB1, TNXBS, TNXB2	HXBL|TENX|TNX|TNXB1|TNXB2|TNXBS|XB|XBS	11976	C9J7W4:E7EPZ9:P22105	NP_061978.6:NP_115859.2
Core matrisome	ECM Glycoproteins	TNXB	tenascin XB	11976	470	Ehlers-Danlos syndrome, hypermobility type, 130020 (3)	600985	6p21.3	Connective tissue	TNXB, TNX, TNXB1, TNXBS, TNXB2	HXBL|TENX|TNX|TNXB1|TNXB2|TNXBS|XB|XBS	11976	C9J7W4:E7EPZ9:P22105	NP_061978.6:NP_115859.2
Core matrisome	ECM Glycoproteins	VWF	von Willebrand factor	12726	3572	von Willebrand disease (3)	193400	12p13.3	Hematological	VWF, F8VWF	F8VWF|VWD	12726	I3L4K4:P04275:Q8TCE8	NP_000543.2
Core matrisome	ECM Glycoproteins	WISP3	WNT1 inducible signaling pathway protein 3	12771	147	Arthropathy, progressive pseudorheumatoid, of childhood, 208230 (3)	603400	6q22-q23	Bone	WISP3, PPAC, PPD	CCN6|LIBC|MGC125987|MGC125988|MGC125989|PPAC|PPD	12771	F8WC24:G3V0J1:O95389:O95958:Q3T1A9	NP_003871.1:NP_937882.1:XP_005267252.1
Core matrisome	ECM Glycoproteins	WISP3	WNT1 inducible signaling pathway protein 3	12771	1435	Spondyloepiphyseal dysplasia tarda with progressive arthropathy, 208230 (3)	603400	6q22-q23	Skeletal	WISP3, PPAC, PPD	CCN6|LIBC|MGC125987|MGC125988|MGC125989|PPAC|PPD	12771	F8WC24:G3V0J1:O95389:O95958:Q3T1A9	NP_003871.1:NP_937882.1:XP_005267252.1
Core matrisome	Proteoglycans	ASPN	asporin	14872	1154	Osteoarthritis, susceptibility to, 165720 (3)	608135	9q21.3-q22	Connective tissue	ASPN, PLAP1	FLJ20129|OS3|PLAP1|SLRR1C	14872	C9JGC9:Q05CQ6:Q5TBF2:Q9BXN1	NP_001180264.1:NP_060150.4
Core matrisome	Proteoglycans	HSPG2	heparan sulfate proteoglycan 2	5273	461	Dyssegmental dysplasia, Silverman-Handmaker type, 224410 (3)	142461	1p36.1	Neurological	HSPG2, PLC, SJS, SJA, SJS1	PLC|PRCAN|SJA|SJS|SJS1	5273	H0Y5A9:H7BYA5:H7C4A6:P98160:Q5SZI5:Q5SZI9:Q5SZJ1:Q5SZJ2	NP_001278789.1:NP_005520.4
Core matrisome	Proteoglycans	HSPG2	heparan sulfate proteoglycan 2	5273	1361	Schwartz-Jampel syndrome, type 1, 255800 (3)	142461	1p36.1	multiple	HSPG2, PLC, SJS, SJA, SJS1	PLC|PRCAN|SJA|SJS|SJS1	5273	H0Y5A9:H7BYA5:H7C4A6:P98160:Q5SZI5:Q5SZI9:Q5SZJ1:Q5SZJ2	NP_001278789.1:NP_005520.4
Core matrisome	Proteoglycans	KERA	keratocan	6309	362	Cornea plana congenita, recessive, 217300 (3)	603288	12q22	Ophthamological	KERA, CNA2	CNA2|SLRR2B	6309	O60938	NP_008966.1
Core matrisome	Proteoglycans	NYX	nyctalopin	8082	1110	Night blindness, congenital stationary, type 1, 310500 (3)	300278	Xp11.4	Ophthamological	CSNB1, NYX	CLRP|CSNB1|CSNB4|MGC138447	8082	Q9GZU5	NP_072089.1:XP_005272689.1
Core matrisome	Proteoglycans	PRG4	p53-responsive gene 4	9364	256	Camptodactyly-arthropathy-coxa vara-pericarditis syndrome, 208250 (3)	604283	1q24-q25	Skeletal	PRG4, CACP, MSF, SZP, HAPO	-	9364	E7EQ48:E9PLR3:J3KP74:Q92954	NP_001121180.1:NP_001121181.1:NP_001121182.1:NP_005798.2
Matrisome-associated	ECM Regulators	A2M	alpha-2-macroglobulin	7	98	Alzheimer disease, susceptibility to (3)	103950	12p13.3-p12.3	Neurological	A2M	CPAMD5|DKFZp779B086|FWP007|S863-7	7	F5H1E8:F8W7L3:H0YFH1:H0YGH6:P01023	NP_000005.2
Matrisome-associated	ECM Regulators	ADAMTS10	ADAM metallopeptidase with thrombospondin type 1 motif, 10	13201	1585	Weill-Marchesani syndrome, recessive, 277600 (3)	608990	19p13.3-p13.2	Connective tissue	ADAMTS10, WMS	ADAM-TS10|WMS	13201	M0QY12:M0QY36:Q9H324	NP_001269281.1:NP_112219.3
Matrisome-associated	ECM Regulators	ADAMTS13	ADAM metallopeptidase with thrombospondin type 1 motif, 13	1366	1497	Thrombotic thrombocytopenic purpura, familial, 274150 (3)	604134	9q34	Hematological	ADAMTS13, VWFCP, TTP	C9orf8|DKFZp434C2322|FLJ42993|MGC118899|MGC118900|	1366	E7EV88:Q76LX8:Q9UGQ1	NP_620594.1:NP_620595.1:NP_620596.2
Matrisome-associated	ECM Regulators	ADAMTS2	ADAM metallopeptidase with thrombospondin type 1 motif, 2	218	470	Ehlers-Danlos syndrome, type VIIC, 225410 (3)	604539	5q23	Connective tissue	ADAMTS2, NPI	ADAM-TS2|ADAMTS-3|NPI|PCINP|PCPNI|hPCPNI	218	O95450	NP_055059.2:NP_067610.1
Matrisome-associated	ECM Regulators	AGT	angiotensinogen (serpin peptidase inhibitor, clade A, member 8)	333	752	Hypertension, essential, susceptibility to, 145500 (3)	106150	1q42-q43	Cardiovascular	AGT, SERPINA8	ANHU|FLJ92595|FLJ97926|SERPINA8	333	P01019	NP_000020.1
Matrisome-associated	ECM Regulators	AGT	angiotensinogen (serpin peptidase inhibitor, clade A, member 8)	333	1257	Preeclampsia, susceptibility to (3)	106150	1q42-q43	Cardiovascular	AGT, SERPINA8	ANHU|FLJ92595|FLJ97926|SERPINA8	333	P01019	NP_000020.1
Matrisome-associated	ECM Regulators	AGT	angiotensinogen (serpin peptidase inhibitor, clade A, member 8)	333	9308	Renal tubular dysgenesis, 267430 (3)	106150	1q42-q43	Renal	AGT, SERPINA8	ANHU|FLJ92595|FLJ97926|SERPINA8	333	P01019	NP_000020.1
Matrisome-associated	ECM Regulators	CST3	cystatin C	2475	291	Cerebral amyloid angiopathy, 105150 (3)	604312	20p11.2	Neurological	CST3	ARMD11|MGC117328	2475	P01034	NP_000090.1:NP_001275543.1
Matrisome-associated	ECM Regulators	CSTB	cystatin B (stefin B)	2482	495	Epilepsy, progressive myoclonic 1, 254800 (3)	601145	21q22.3	Neurological	CSTB, STFB, EPM1	CST6|EPM1|PME|STFB	2482	P04080	NP_000091.1
Matrisome-associated	ECM Regulators	CTSA	cathepsin A	9251	568	Galactosialidosis (3)	256540	20q13.1	Metabolic	PPGB, GSL, NGBE, GLB2, CTSA	GLB2|GSL|NGBE|PPCA|PPGB	9251	P10619:Q5JZG9:Q5JZH0:U3KQ41:U3KQF1:U3KQU6:X6R5C5:X6R8A1	NP_000299.2:NP_000299.2:NP_001121167.1:NP_001161066.1:NP_001161066.1
Matrisome-associated	ECM Regulators	CTSC	cathepsin C	2528	634	Haim-Munk syndrome, 245010 (3)	602365	11q14.1-q14.3	multiple	CTSC, CPPI, PALS, PLS, HMS	CPPI|DPP1|DPPI|HMS|JP|JPD|PALS|PLS	2528	H0YCY8:H0YDA2:P53634	NP_001107645.1:NP_001805.3:NP_680475.1
Matrisome-associated	ECM Regulators	CTSC	cathepsin C	2528	1184	Papillon-Lefevre syndrome, 245000 (3)	602365	11q14.1-q14.3	multiple	CTSC, CPPI, PALS, PLS, HMS	CPPI|DPP1|DPPI|HMS|JP|JPD|PALS|PLS	2528	H0YCY8:H0YDA2:P53634	NP_001107645.1:NP_001805.3:NP_680475.1
Matrisome-associated	ECM Regulators	CTSC	cathepsin C	2528	1207	Periodontitis, juvenile, 170650 (3)	602365	11q14.1-q14.3	Ear,Nose,Throat	CTSC, CPPI, PALS, PLS, HMS	CPPI|DPP1|DPPI|HMS|JP|JPD|PALS|PLS	2528	H0YCY8:H0YDA2:P53634	NP_001107645.1:NP_001805.3:NP_680475.1
Matrisome-associated	ECM Regulators	CTSK	cathepsin K	2536	1293	Pycnodysostosis, 265800 (3)	601105	1q21	Skeletal	CTSK	CTS02|CTSO|CTSO1|CTSO2|MGC23107|PKND|PYCD	2536	P43235:Q5QP40	NP_000387.1
Matrisome-associated	ECM Regulators	F10	coagulation factor X	3528	520	Factor X deficiency (3)	227600	13q34	Hematological	F10	FX|FXA	3528	B7ZBK1:F8WBM7:P00742:Q5JVE8	NP_000495.1:XP_005268355.1
Matrisome-associated	ECM Regulators	F12	coagulation factor XII (Hageman factor)	3530	520	Factor XII deficiency (3)	234000	5q33-qter	Hematological	F12, HAF	HAE3|HAEX|HAF	3530	P00748	NP_000496.2
Matrisome-associated	ECM Regulators	F13A1	coagulation factor XIII, A1 polypeptide	3531	520	Factor XIIIA deficiency (3)	134570	6p25-p24	Hematological	F13A1, F13A	F13A	3531	A6PVK5:H0Y4W5:H0Y796:P00488:Q9NQP5	NP_000120.2:XP_006715073.1
Matrisome-associated	ECM Regulators	F13B	coagulation factor XIII, B polypeptide	3534	520	Factor XIIIB deficiency (3)	134580	1q31-q32.1	Hematological	F13B	FXIIIB	3534	P05160	NP_001985.2
Matrisome-associated	ECM Regulators	F2	coagulation factor II (thrombin)	3535	460	Dysprothrombinemia (3)	176930	11p11-q12	Hematological	F2	PT	3535	C9JV37:E9PIT3:P00734	NP_000497.1
Matrisome-associated	ECM Regulators	F2	coagulation factor II (thrombin)	3535	751	Hyperprothrombinemia (3)	176930	11p11-q12	Hematological	F2	PT	3535	C9JV37:E9PIT3:P00734	NP_000497.1
Matrisome-associated	ECM Regulators	F2	coagulation factor II (thrombin)	3535	786	Hypoprothrombinemia (3)	176930	11p11-q12	Hematological	F2	PT	3535	C9JV37:E9PIT3:P00734	NP_000497.1
Matrisome-associated	ECM Regulators	F7	coagulation factor VII (serum prothrombin conversion accelerator)	3544	520	Factor VII deficiency (3)	227500	13q34	Hematological	F7	-	3544	E9PH36:F5H8B0:P08709	NP_000122.1:NP_062562.1
Matrisome-associated	ECM Regulators	F7	coagulation factor VII (serum prothrombin conversion accelerator)	3544	1054	Myocardial infarction, decreased susceptibility to (3)	227500	13q34	Cardiovascular	F7	-	3544	E9PH36:F5H8B0:P08709	NP_000122.1:NP_062562.1
Matrisome-associated	ECM Regulators	F9	coagulation factor IX	3551	663	Hemophilia B (3)	306900	Xq27.1-q27.2	Hematological	F9, HEMB	FIX|HEMB|MGC129641|MGC129642|PTC	3551	P00740	NP_000124.1
Matrisome-associated	ECM Regulators	F9	coagulation factor IX	3551	1580	Warfarin sensitivity (3)	306900	Xq27.1-q27.2	Hematological	F9, HEMB	FIX|HEMB|MGC129641|MGC129642|PTC	3551	P00740	NP_000124.1
Matrisome-associated	ECM Regulators	HRG	histidine-rich glycoprotein	5181	1497	Thrombophilia due to HRG deficiency (3)	142640	3q27	Hematological	HRG	DKFZp779H1622|HPRG|HRGP	5181	P04196	NP_000403.1
Matrisome-associated	ECM Regulators	HYAL1	hyaluronoglucosaminidase 1	5320	1033	Mucopolysaccharidosis type IX, 601492 (3)	607071	3p21.3-p21.2	Metabolic	HYAL1	HYAL-1|LUCA1|MGC45987|NAT6	5320	C9JB49:C9JRK1:Q12794	NP_149349.2:NP_695013.1:NP_695014.1:NP_695015.1:NP_695017.1
Matrisome-associated	ECM Regulators	ITIH4	inter-alpha (globulin) inhibitor H4 (plasma Kallikrein-sensitive glycoprotein)	6169	724	Hypercholesterolemia, susceptibility to, 143890 (3)	600564	3p21.2-p14.1	Metabolic	ITIH4, PK120, ITIHL1	DKFZp686G21125|H4P|IHRP|ITIHL1|PK120	6169	B7ZKJ8:F5GXQ1:H7C0L5:Q14624	NP_001159921.1:NP_002209.2
Matrisome-associated	ECM Regulators	LPA	lipoprotein, Lp(a)	6667	916	LPA deficiency, congenital (3)	152200	6q27	Metabolic	LPA	AK38|APOA|LP	6667	P08519	NP_005568.2
Matrisome-associated	ECM Regulators	MASP2	mannan-binding lectin serine peptidase 2	6902	956	MASP2 deficiency (3)	605102	1p36.3-p36.2	Immunological	MASP2	MAP19|MASP-2|MASP1P1|sMAP	6902	O00187	NP_006601.2:NP_631947.1
Matrisome-associated	ECM Regulators	MMP1	matrix metallopeptidase 1 (interstitial collagenase)	7155	360	COPD, rate of decline of lung function in, 606963 (3)	120353	11q22-q23	Respiratory	MMP1, CLG	CLG|CLGN	7155	P03956	NP_002412.1
Matrisome-associated	ECM Regulators	MMP2	matrix metallopeptidase 2 (gelatinase A, 72kDa gelatinase, 72kDa type IV collagenase)	7166	1157	Osteolysis, idiopathic, Saudi type, 605156 (3)	120360	16q13	Bone	MMP2, CLG4A, MONA	CLG4|CLG4A|MMP-II|MONA|TBE-1	7166	H3BR66:H3BS34:H3BV48:J3KRB7:P08253	NP_001121363.1:NP_004521.1
Matrisome-associated	ECM Regulators	MMP3	matrix metallopeptidase 3 (stromelysin 1, progelatinase)	7173	365	Coronary heart disease, susceptibility to (3)	185250	11q23	Cardiovascular	MMP3, STMY1	CHDS6|MGC126102|MGC126103|MGC126104|MMP-3|SL-1|STM	7173	E9PKX2:H7C139:P08254	NP_002413.1
Matrisome-associated	ECM Regulators	PLAU	plasminogen activator, urokinase	9052	98	Alzheimer disease, late-onset, susceptibility to, 104300 (3)	191840	10q24	Neurological	PLAU, URK	ATF|UPA|URK|u-PA	9052	E7ESM2:E7ET40:P00749:S4R3G7	NP_001138503.1:NP_002649.1
Matrisome-associated	ECM Regulators	PLG	plasminogen	9071	356	Conjunctivitis, ligneous, 217090 (3)	173350	6q26	Ophthamological	PLG	DKFZp779M0222	9071	A6PVI2:P00747:Q5TEH5	NP_000292.1:NP_001161810.1
Matrisome-associated	ECM Regulators	PLG	plasminogen	9071	1235	Plasminogen Tochigi disease (3)	173350	6q26	Hematological	PLG	DKFZp779M0222	9071	A6PVI2:P00747:Q5TEH5	NP_000292.1:NP_001161810.1
Matrisome-associated	ECM Regulators	PLOD1	procollagen-lysine 1, 2-oxoglutarate 5-dioxygenase 1	9081	470	Ehlers-Danlos syndrome, type VI, 225400 (3)	153454	1p36.3-p36.2	Connective tissue	PLOD, PLOD1	FLJ42041|LH|LH1|LLH|PLOD	9081	B4DR87:Q02809:Q5JXB7:Q5JXB8:Q5JXB9	NP_000293.2
Matrisome-associated	ECM Regulators	PLOD1	procollagen-lysine 1, 2-oxoglutarate 5-dioxygenase 1	9081	1103	Nevo syndrome, 601451 (3)	153454	1p36.3-p36.2	Connective tissue	PLOD, PLOD1	FLJ42041|LH|LH1|LLH|PLOD	9081	B4DR87:Q02809:Q5JXB7:Q5JXB8:Q5JXB9	NP_000293.2
Matrisome-associated	ECM Regulators	PLOD2	procollagen-lysine, 2-oxoglutarate 5-dioxygenase 2	9082	233	Bruck syndrome 2, 609220 (3)	601865	3q23-q24	Unclassified	PLOD2	LH2|TLH	9082	B3KWS3:C9JXZ0:E7ETU9:F8WEW3:O00469	NP_000926.2:NP_891988.1
Matrisome-associated	ECM Regulators	PRSS1	protease, serine, 1 (trypsin 1)	9475	1179	Pancreatitis, hereditary, 167800 (3)	276000	7q35	Gastrointestinal	PRSS1, TRY1	TRP1|TRY1|TRY4|TRYP1	9475	E7EQ64:H0Y8D1:P07477	NP_002760.1
Matrisome-associated	ECM Regulators	PRSS12	protease, serine, 12 (neurotrypsin, motopsin)	9477	990	Mental retardation, nonsyndromic, autosomal recessive, 249500 (3)	606709	4q25-q26	Neurological	PRSS12, BSSP3	BSSP-3|BSSP3|MGC12722|MRT1	9477	P56730	NP_003610.2
Matrisome-associated	ECM Regulators	SERPINA10	serpin peptidase inhibitor, clade A (alpha-1 antiproteinase, antitrypsin), member 10	15996	1557	Venous thrombosis, susceptibility to (3)	605271	14q32.1	Cardiovascular	SERPINA10, ZPI	PZI|ZPI	15996	G3V2W1:Q9UK55	NP_001094077.1:NP_057270.1:XP_005267790.1:XP_006725227.1:XP_006720222.1:XP_006725226.1
Matrisome-associated	ECM Regulators	SERPINA3	serpin peptidase inhibitor, clade A (alpha-1 antiproteinase, antitrypsin), member 3	16	87	Alpha-1-antichymotrypsin deficiency (3)	107280	14q32.1	Respiratory	SERPINA3, AACT, ACT	AACT|ACT|GIG24|GIG25|MGC88254	16	G3V3A0:G3V595:P01011	NP_001076.2
Matrisome-associated	ECM Regulators	SERPINA3	serpin peptidase inhibitor, clade A (alpha-1 antiproteinase, antitrypsin), member 3	16	294	Cerebrovascular disease, occlusive (3)	107280	14q32.1	Unclassified	SERPINA3, AACT, ACT	AACT|ACT|GIG24|GIG25|MGC88254	16	G3V3A0:G3V595:P01011	NP_001076.2
Matrisome-associated	ECM Regulators	SERPIND1	serpin peptidase inhibitor, clade D (heparin cofactor), member 1	4838	1497	Thrombophilia due to heparin cofactor II deficiency (3)	142360	22q11	Hematological	HCF2, HC2, SERPIND1	D22S673|HC2|HCF2|HCII|HLS2|LS2	4838	P05546	NP_000176.2:XP_005261654.1
Matrisome-associated	ECM Regulators	SERPINF2	serpin peptidase inhibitor, clade F (alpha-2 antiplasmin, pigment epithelium derived factor), member 2	9075	1234	Plasmin inhibitor deficiency (3)	262850	17pter-p12	Hematological	PLI, SERPINF2	A2AP|AAP|ALPHA-2-PI|API|PLI	9075	C9JMH6:C9JPV4:P08697	NP_000925.2:NP_001159392.1:NP_001159393.1:XP_005256758.1
Matrisome-associated	ECM Regulators	SERPING1	serpin peptidase inhibitor, clade G (C1 inhibitor), member 1	1228	114	Angioedema, hereditary, 106100 (3)	606860	11q11-q13.1	Immunological	C1NH, HAE1, HAE2, SERPING1	C1IN|C1INH|C1NH|HAE1|HAE2	1228	B4E1F0:B4E1H2:B5MCB9:C9JZJ9:E9PGN7:E9PK97:H0YCA1:H9KV48:P05155	NP_000053.2:NP_001027466.1
Matrisome-associated	ECM Regulators	SERPINI1	serpin peptidase inhibitor, clade I (neuroserpin), member 1	8943	476	Encephalopathy, familial, with neuroserpin inclusion bodies, 604218 (3)	602445	3q26	Neurological	SERPINI1, PI12	DKFZp781N13156|PI12|neuroserpin	8943	C9JDY5:C9JQU8:H7C5T9:Q99574	NP_001116224.1:NP_005016.1:XP_006713720.1
Matrisome-associated	ECM Regulators	TGM1	transglutaminase 1 (K polypeptide epidermal type I, protein-glutamine-gamma-glutamyltransferase)	11777	793	Ichthyosiform erythroderma, congenital, 242100 (3)	190195	14q11.2	Dermatological	TGM1, ICR2, LI1	ICR2|KTG|LI|LI1|TGASE|TGK	11777	B4DWR7:H0YKI6:H0YLJ6:H0YLT9:H0YMQ8:H0YN27:H0YNM4:P22735	NP_000350.1
Matrisome-associated	ECM Regulators	TGM1	transglutaminase 1 (K polypeptide epidermal type I, protein-glutamine-gamma-glutamyltransferase)	11777	794	Ichthyosis, lamellar, autosomal recessive, 242300 (3)	190195	14q11.2	Dermatological	TGM1, ICR2, LI1	ICR2|KTG|LI|LI1|TGASE|TGK	11777	B4DWR7:H0YKI6:H0YLJ6:H0YLT9:H0YMQ8:H0YN27:H0YNM4:P22735	NP_000350.1
Matrisome-associated	ECM Regulators	TGM1	transglutaminase 1 (K polypeptide epidermal type I, protein-glutamine-gamma-glutamyltransferase)	11777	1373	Self-healing collodion baby, 242300 (3)	190195	14q11.2	Dermatological	TGM1, ICR2, LI1	ICR2|KTG|LI|LI1|TGASE|TGK	11777	B4DWR7:H0YKI6:H0YLJ6:H0YLT9:H0YMQ8:H0YN27:H0YNM4:P22735	NP_000350.1
Matrisome-associated	ECM Regulators	TIMP3	TIMP metallopeptidase inhibitor 3	11822	1416	Sorsby fundus dystrophy, 136900 (3)	188826	22q12.1-q13.2	Ophthamological	TIMP3, SFD	HSMRK222|K222|K222TA2|SFD	11822	P35625	NP_000353.1
Matrisome-associated	ECM-affiliated Proteins	C1QA	complement component 1, q subcomponent, A chain	1241	240	C1q deficiency, type A (3)	120550	1p36.3-p34.1	Immunological	C1QA	-	1241	P02745:X6RLJ0	NP_057075.1
Matrisome-associated	ECM-affiliated Proteins	C1QB	complement component 1, q subcomponent, B chain	1242	240	C1q deficiency, type B (3)	120570	1p36.3-p34.1	Immunological	C1QB	-	1242	D6R934:D6RGJ1:P02746	NP_000482.3:XP_005246039.1
Matrisome-associated	ECM-affiliated Proteins	C1QTNF5	C1q and tumor necrosis factor related protein 5	14344	1315	Retinal degeneration, late-onset, autosomal dominant, 605670 (3)	608752	11q23.3	Ophthamological	C1QTNF5, CTRP5, LORD	CTRP5|DKFZp586B0621|FLJ30570|LORD	14344	Q9BXJ0	NP_001265360.1:NP_056460.1
Matrisome-associated	ECM-affiliated Proteins	CD209	CD209 molecule	1641	413	Dengue fever, protection against (3)	604672	19p13.3	Immunological	CD209, CDSIGN	CDSIGN|CLEC4L|DC-SIGN|DC-SIGN1|MGC129965	1641	M0QZG5:M0R0P0:Q9NNX6:X6RB12	NP_001138365.1:NP_001138365.1:NP_001138366.1:NP_001138367.1:NP_001138368.1:NP_001138369.1:NP_066978.1:NP_001138371.1
Matrisome-associated	ECM-affiliated Proteins	FREM2	FRAS1 related extracellular matrix protein 2	25396	551	Fraser syndrome, 219000 (3)	608945	13q13.3	multiple	FREM2	DKFZp686J0811|DKFZp781I048|KIAA1074	25396	Q5SZK8	NP_997244.4
Matrisome-associated	ECM-affiliated Proteins	GPC3	glypican 3	4451	1397	Simpson-Golabi-Behmel syndrome, type 1, 312870 (3)	300037	Xq26	multiple	GPC3, SDYS, SGBS1	DGSX|GTR2-2|MXR7|OCI-5|SDYS|SGB|SGBS|SGBS1	4451	H0Y3U6:P51654	NP_001158089.1:NP_001158091.1:NP_004475.1
Matrisome-associated	ECM-affiliated Proteins	GPC3	glypican 3	4451	1595	Wilms tumor, somatic, 194070 (3)	300037	Xq26	Cancer	GPC3, SDYS, SGBS1	DGSX|GTR2-2|MXR7|OCI-5|SDYS|SGB|SGBS|SGBS1	4451	H0Y3U6:P51654	NP_001158089.1:NP_001158091.1:NP_004475.1
Matrisome-associated	ECM-affiliated Proteins	LGALS2	lectin, galactoside-binding, soluble, 2	6562	1054	Myocardial infarction, susceptibility to (3)	150571	22q13.1	Cardiovascular	LGALS2	HL14|MGC75071	6562	B0QYC9:P05162	NP_006489.1
Matrisome-associated	ECM-affiliated Proteins	LMAN1	lectin, mannose-binding, 1	6631	350	Combined factor V and VIII deficiency, 227300 (3)	601567	18q21.3-q22	Hematological	LMAN1, ERGIC53, F5F8D, MCFD1	ERGIC-53|ERGIC53|F5F8D|FMFD1|MCFD1|MR60|gp58	6631	P49257	NP_005561.1
Matrisome-associated	ECM-affiliated Proteins	MBL2	mannose-binding lectin (protein C) 2, soluble (opsonic defect)	6922	987	Meningococcal disease, susceptibility to (3)	154545	10q11.2-q21	Immunological	MBL2, MBL, MBP1	COLEC1|HSMBPC|MBL|MBP|MBP1|MGC116832|MGC116833	6922	P11226	NP_000233.1:XP_006717924.1
Matrisome-associated	ECM-affiliated Proteins	MBL2	mannose-binding lectin (protein C) 2, soluble (opsonic defect)	6922	2327	Chronic infections, due to opsonin defect (3)	154545	10q11.2-q21	Immunological	MBL2, MBL, MBP1	COLEC1|HSMBPC|MBL|MBP|MBP1|MGC116832|MGC116833	6922	P11226	NP_000233.1:XP_006717924.1
Matrisome-associated	ECM-affiliated Proteins	SFTPA1	surfactant protein A1	10798	1291	Pulmonary fibrosis, idiopathic, susceptibility to, 178500 (3)	178630	10q22.2-q23.1	Respiratory	SFTPA1, SFTP1	AC068139.6|COLEC4|FLJ50593|FLJ51913|FLJ61144|FLJ77	10798	B4DNW5:J3KPA7:Q8IWL2	NP_001087239.2:NP_001158116.1:NP_001158119.1:NP_005402.3:XP_005270119.1:XP_006718016.1
Matrisome-associated	ECM-affiliated Proteins	SFTPB	surfactant protein B	10801	1291	Pulmonary alveolar proteinosis, congenital, 265120 (3)	178640	2p12-p11.2	Respiratory	SFTPB, SFTB3	PSP-B|SFTB3|SFTP3|SMDP1|SP-B	10801	D6W5L6:H0Y7V6:P07988:U3KQT2	NP_000533.3:NP_942140.2:NP_000533.3:NP_942140.2:XP_005264544.1
Matrisome-associated	ECM-affiliated Proteins	SFTPC	surfactant protein C	10802	1238	Pneumonitis, desquamative interstitial, 263000 (3)	178620	8p21	Respiratory	SFTPC, SFTP2	PSP-C|SFTP2|SMDP2|SP-C	10802	C9JYF6:E5RG20:E5RG93:E5RHW5:E5RI64:E5RI92:P11686	NP_001165828.1:NP_001165881.1:NP_003009.2
Matrisome-associated	ECM-affiliated Proteins	SFTPC	surfactant protein C	10802	1291	Pulmonary alveolar proteinosis, 265120 (3)	178620	8p21	Respiratory	SFTPC, SFTP2	PSP-C|SFTP2|SMDP2|SP-C	10802	C9JYF6:E5RG20:E5RG93:E5RHW5:E5RI64:E5RI92:P11686	NP_001165828.1:NP_001165881.1:NP_003009.2
Matrisome-associated	ECM-affiliated Proteins	SFTPC	surfactant protein C	10802	1291	Pulmonary fibrosis, idiopathic, familial, 178500 (3)	178620	8p21	Respiratory	SFTPC, SFTP2	PSP-C|SFTP2|SMDP2|SP-C	10802	C9JYF6:E5RG20:E5RG93:E5RHW5:E5RI64:E5RI92:P11686	NP_001165828.1:NP_001165881.1:NP_003009.2
Matrisome-associated	ECM-affiliated Proteins	SFTPC	surfactant protein C	10802	1464	Surfactant protein C deficiency (3)	178620	8p21	Respiratory	SFTPC, SFTP2	PSP-C|SFTP2|SMDP2|SP-C	10802	C9JYF6:E5RG20:E5RG93:E5RHW5:E5RI64:E5RI92:P11686	NP_001165828.1:NP_001165881.1:NP_003009.2
Matrisome-associated	Secreted Factors	AMH	anti-Mullerian hormone	464	1212	Persistent Mullerian duct syndrome, type I, 261550 (3)	600957	19p13.3-p13.2	Developmental	AMH, MIF	MIF|MIS	464	K7EJU5:P03971	NP_000470.2
Matrisome-associated	Secreted Factors	BDNF	brain-derived neurotrophic factor	1033	287	Central hypoventilation syndrome, congenital, 209880 (3)	113505	11p13	Respiratory	BDNF	MGC34632	1033	E9PMP3:P23560	NP_001137277.1:NP_001137278.1:NP_001137279.1:NP_001137280.1:NP_001137281.1:NP_001137282.1:NP_001137283.1:NP_001137284.1:NP_001137285.1:NP_001137286.1:NP_001137288.1:NP_001700.2:NP_733927.1:NP_733928.1:NP_733929.1:NP_733930.1:NP_733931.1
Matrisome-associated	Secreted Factors	BDNF	brain-derived neurotrophic factor	1033	984	Memory impairment, susceptibility to (3)	113505	11p13	Neurological	BDNF	MGC34632	1033	E9PMP3:P23560	NP_001137277.1:NP_001137278.1:NP_001137279.1:NP_001137280.1:NP_001137281.1:NP_001137282.1:NP_001137283.1:NP_001137284.1:NP_001137285.1:NP_001137286.1:NP_001137288.1:NP_001700.2:NP_733927.1:NP_733928.1:NP_733929.1:NP_733930.1:NP_733931.1
Matrisome-associated	Secreted Factors	BDNF	brain-derived neurotrophic factor	1033	1128	Obsessive-compulsive disorder, protection against, 164230 (3)	113505	11p13	Psychiatric	BDNF	MGC34632	1033	E9PMP3:P23560	NP_001137277.1:NP_001137278.1:NP_001137279.1:NP_001137280.1:NP_001137281.1:NP_001137282.1:NP_001137283.1:NP_001137284.1:NP_001137285.1:NP_001137286.1:NP_001137288.1:NP_001700.2:NP_733927.1:NP_733928.1:NP_733929.1:NP_733930.1:NP_733931.1
Matrisome-associated	Secreted Factors	BMP15	bone morphogenetic protein 15	1068	3171	Ovarian dysgenesis 2, 300510 (3)	300247	Xp11.2	Endocrine	BMP15, GDF9B, ODG2	GDF9B|ODG2|POF4	1068	O95972	NP_005439.2
Matrisome-associated	Secreted Factors	CCL5	chemokine (C-C motif) ligand 5	10632	684	HIV-1 disease, delayed progression of (3)	187011	17q11.2-q12	Immunological	CCL5, SCYA5, D17S136E, TCP228	D17S136E|MGC17164|RANTES|SCYA5|SISd|TCP228	10632	K7EJM0:P13501	NP_002976.2
Matrisome-associated	Secreted Factors	CCL5	chemokine (C-C motif) ligand 5	10632	684	HIV-1 disease, rapid progression of (3)	187011	17q11.2-q12	Immunological	CCL5, SCYA5, D17S136E, TCP228	D17S136E|MGC17164|RANTES|SCYA5|SISd|TCP228	10632	K7EJM0:P13501	NP_002976.2
Matrisome-associated	Secreted Factors	CFC1	cripto, FRL-1, cryptic family 1	18292	444	Double-outlet right ventricle, 217095 (3)	605194	2q21.1	Cardiovascular	CFC1, CRYPTIC, HTX2	CRYPTIC|FLJ77897|HTX2|MGC133213	18292	P0CG37	NP_001257349.1:NP_001257350.1:NP_115934.1
Matrisome-associated	Secreted Factors	CFC1	cripto, FRL-1, cryptic family 1	18292	675	Heterotaxy, visceral, 605376 (3)	605194	2q21.1	multiple	CFC1, CRYPTIC, HTX2	CRYPTIC|FLJ77897|HTX2|MGC133213	18292	P0CG37	NP_001257349.1:NP_001257350.1:NP_115934.1
Matrisome-associated	Secreted Factors	CFC1	cripto, FRL-1, cryptic family 1	18292	1519	Transposition of great arteries, dextro-looped, 217095 (3)	605194	2q21.1	Developmental	CFC1, CRYPTIC, HTX2	CRYPTIC|FLJ77897|HTX2|MGC133213	18292	P0CG37	NP_001257349.1:NP_001257350.1:NP_115934.1
Matrisome-associated	Secreted Factors	CRLF1	cytokine receptor-like factor 1	2364	2344	Cold-induced sweating syndrome, 272430 (3)	604237	19p12	multiple	CRLF1, CISS	CISS|CISS1|CLF|CLF-1|NR6|zcytor5	2364	M0QZL6:O75462	NP_004741.1
Matrisome-associated	Secreted Factors	CXCL12	chemokine (C-X-C motif) ligand 12 (stromal cell-derived factor 1)	10672	70	AIDS, resistance to (3)	600835	10q11.1	Immunological	CXCL12, SDF1	PBSF|SCYB12|SDF-1a|SDF-1b|SDF1|SDF1A|SDF1B|TLSF-a|	10672	P48061	NP_000600.1:NP_001029058.1:NP_001171605.1:NP_001264919.1:NP_954637.1
Matrisome-associated	Secreted Factors	DHH	desert hedgehog homolog (Drosophila)	2865	619	Gonadal dysgenesis, 46XY, partial, with minifascicular neuropathy, 607080 (3)	605423	12q13.1	Endocrine	DHH	HHG-3|MGC35145	2865	O43323	NP_066382.1
Matrisome-associated	Secreted Factors	EDA	ectodysplasin A	3157	466	Ectodermal dysplasia-1, anhidrotic, 305100 (3)	300451	Xq12-q13.1	Dermatological	ED1, EDA, HED	ED1|ED1-A1|ED1-A2|EDA1|EDA2|HED|STHAGX1|XHED|XLHED	3157	D6RA95:Q92838	NP_001005609.1:NP_001005610.2:NP_001005612.2:NP_001005613.1:NP_001390.1
Matrisome-associated	Secreted Factors	FGF10	fibroblast growth factor 10	3666	132	Aplasia of lacrimal and salivary glands, 180920 (3)	602115	5p13-p12	Gastrointestinal	FGF10	-	3666	D6RG33:O15520	NP_004456.1:XP_005248321.1
Matrisome-associated	Secreted Factors	FGF14	fibroblast growth factor 14	3671	1428	Spinocerebellar ataxia-27, 609307 (3)	601515	13q34	Neurological	FGF14, FHF4, SCA27	FHF4|MGC119129|SCA27	3671	Q92915	NP_004106.1:NP_787125.1
Matrisome-associated	Secreted Factors	FGF23	fibroblast growth factor 23	3680	254	Calcinosis, tumoral, 211900 (3)	605380	12p13.3	Bone	FGF23, ADHR, HPDR2, PHPTC	ADHR|HPDR2|HYPF|PHPTC	3680	Q9GZV9	NP_065689.1
Matrisome-associated	Secreted Factors	FGF23	fibroblast growth factor 23	3680	784	Hypophosphatemic rickets, autosomal dominant, 193100 (3)	605380	12p13.3	Bone	FGF23, ADHR, HPDR2, PHPTC	ADHR|HPDR2|HYPF|PHPTC	3680	Q9GZV9	NP_065689.1
Matrisome-associated	Secreted Factors	FRZB	frizzled-related protein	3959	1154	Osteoarthritis of hip, female-specific, susceptibility to, 165720 (3)	605083	2q31-q33	Connective tissue	FRZB, FRZB1, SRFP3	FRE|FRITZ|FRP-3|FRZB-1|FRZB-PEN|FRZB1|FZRB|OS1|SFR	3959	Q92765	NP_001454.2
Matrisome-associated	Secreted Factors	GDF5	growth differentiation factor 5	4220	39	Acromesomelic dysplasia, Hunter-Thompson type, 201250 (3)	601146	20q11.2	Skeletal	GDF5, CDMP1	BMP14|CDMP1|LAP4|OS5|SYNS2	4220	P43026	NP_000548.2
Matrisome-associated	Secreted Factors	GDF5	growth differentiation factor 5	4220	224	Brachydactyly, type C, 113100 (3)	601146	20q11.2	Skeletal	GDF5, CDMP1	BMP14|CDMP1|LAP4|OS5|SYNS2	4220	P43026	NP_000548.2
Matrisome-associated	Secreted Factors	GDF5	growth differentiation factor 5	4220	539	Fibular hypoplasia and complex brachydactyly, 228900 (3)	601146	20q11.2	Skeletal	GDF5, CDMP1	BMP14|CDMP1|LAP4|OS5|SYNS2	4220	P43026	NP_000548.2
Matrisome-associated	Secreted Factors	GDF5	growth differentiation factor 5	4220	2315	Chondrodysplasia, Grebe type, 200700 (3)	601146	20q11.2	Skeletal	GDF5, CDMP1	BMP14|CDMP1|LAP4|OS5|SYNS2	4220	P43026	NP_000548.2
Matrisome-associated	Secreted Factors	GDNF	glial cell derived neurotrophic factor	4232	287	Central hypoventilation syndrome, 209880 (3)	600837	5p13.1-p12	Respiratory	GDNF	ATF1|ATF2|HFB1-GDNF	4232	P39905	NP_000505.1:NP_001177397.1:NP_001177398.1:NP_001265027.1:NP_954701.1
Matrisome-associated	Secreted Factors	GDNF	glial cell derived neurotrophic factor	4232	681	Hirschsprung disease, 142623 (3)	600837	5p13.1-p12	Gastrointestinal	GDNF	ATF1|ATF2|HFB1-GDNF	4232	P39905	NP_000505.1:NP_001177397.1:NP_001177398.1:NP_001265027.1:NP_954701.1
Matrisome-associated	Secreted Factors	GH1	growth hormone 1	4261	825	Isolated growth hormone deficiency, Illig type with absent GH and Kowarski type with bioinactive GH (3)	139250	17q22-q24	Endocrine	GH1, GHN	GH|GH-N|GHN|IGHD1B|hGH-N	4261	B1A4G9:P01241	NP_000506.2:NP_072053.1:NP_072054.1:XP_005257275.1:XP_005257276.1:NP_072055.1
Matrisome-associated	Secreted Factors	HGF	hepatocyte growth factor (hepapoietin A	NA	537	Fibromatosis, gingival, 135300 (3)	182530	2p22-p21	Connective tissue	SOS1, GINGF, GF1, HGF	NA	NA	NA	NA
Matrisome-associated	Secreted Factors	IFNG	interferon, gamma	5438	70	AIDS, rapid progression to, 609423 (3)	147570	12q14	Immunological	IFNG	IFG|IFI	5438	P01579	NP_000610.2
Matrisome-associated	Secreted Factors	IFNG	interferon, gamma	5438	133	Aplastic anemia, 609135 (3)	147570	12q14	Hematological	IFNG	IFG|IFI	5438	P01579	NP_000610.2
Matrisome-associated	Secreted Factors	IFNG	interferon, gamma	5438	1533	Tuberculosis, susceptibility to, 607948 (3)	147570	12q14	Respiratory	IFNG	IFG|IFI	5438	P01579	NP_000610.2
Matrisome-associated	Secreted Factors	IFNG	interferon, gamma	5438	1534	TSC2 angiomyolipomas, renal, modifier of, 191100 (3)	147570	12q14	multiple	IFNG	IFG|IFI	5438	P01579	NP_000610.2
Matrisome-associated	Secreted Factors	IGF1	insulin-like growth factor 1 (somatomedin C)	5464	2628	Growth retardation with deafness and mental retardation due to IGF1 deficiency,	147440	12q22-q24.1	Developmental	IGF1	IGF1A|IGFI	5464	P05019:Q13429	NP_000609.1:NP_001104754.1:NP_001104755.1:NP_001104753.1
Matrisome-associated	Secreted Factors	IGF2	insulin-like growth factor 2 (somatomedin A)	5466	819	Intrauterine and postnatal growth retardation (3)	147470	11p15.5	Developmental	IGF2	C11orf43|FLJ22066|FLJ44734|INSIGF|pp9974	5466	P01344	NP_000603.1:NP_001007140.2:NP_001121070.1:NP_001278790.1:NP_001278791.1
Matrisome-associated	Secreted Factors	IHH	Indian hedgehog homolog (Drosophila)	5956	33	Acrocapitofemoral dysplasia, 607778 (3)	600726	2q33-q35	Skeletal	IHH, BDA1	BDA1|HHG2	5956	Q14623	NP_002172.2
Matrisome-associated	Secreted Factors	IHH	Indian hedgehog homolog (Drosophila)	5956	224	Brachydactyly, type A1, 112500 (3)	600726	2q33-q35	Skeletal	IHH, BDA1	BDA1|HHG2	5956	Q14623	NP_002172.2
Matrisome-associated	Secreted Factors	IL10	interleukin 10	5962	623	Graft-versus-host disease, protection against (3)	124092	1q31-q32	Immunological	IL10, CSIF	CSIF|IL-10|IL10A|MGC126450|MGC126451|TGIF	5962	P22301	NP_000563.1
Matrisome-associated	Secreted Factors	IL10	interleukin 10	5962	684	HIV-1, susceptibility to (3)	124092	1q31-q32	Immunological	IL10, CSIF	CSIF|IL-10|IL10A|MGC126450|MGC126451|TGIF	5962	P22301	NP_000563.1
Matrisome-associated	Secreted Factors	IL10	interleukin 10	5962	1324	Rheumatoid arthritis, progression of, 180300 (3)	124092	1q31-q32	Connective tissue	IL10, CSIF	CSIF|IL-10|IL10A|MGC126450|MGC126451|TGIF	5962	P22301	NP_000563.1
Matrisome-associated	Secreted Factors	IL12B	interleukin 12B (natural killer cell stimulatory factor 2, cytotoxic lymphocyte maturation factor 2, p40)	5970	153	Asthma, susceptibility to, 600807 (3)	161561	5q31.1-q33.1	Respiratory	IL12B, NKSF2	CLMF|CLMF2|IL-12B|NKSF|NKSF2	5970	P29460	NP_002178.2
Matrisome-associated	Secreted Factors	IL13	interleukin 13	5973	83	Allergic rhinitis, susceptibility to, 607154 (3)	147683	5q31	Immunological	IL13, ALRH	ALRH|BHR1|IL-13|MGC116786|MGC116788|MGC116789|P600	5973	P35225	NP_002179.2
Matrisome-associated	Secreted Factors	IL13	interleukin 13	5973	153	Asthma, susceptibility to, 600807 (3)	147683	5q31	Respiratory	IL13, ALRH	ALRH|BHR1|IL-13|MGC116786|MGC116788|MGC116789|P600	5973	P35225	NP_002179.2
Matrisome-associated	Secreted Factors	IL1B	interleukin 1, beta	5992	572	Gastric cancer risk after H. pylori infection, 137215 (3)	147720	2q14	Cancer	IL1B	IL-1|IL1-BETA|IL1F2	5992	C9JSC2:C9JVK0:C9JWV2:P01584	NP_000567.1
Matrisome-associated	Secreted Factors	IL1RN	interleukin 1 receptor antagonist	6000	572	Gastric cancer risk after H. pylori infection, 137215 (3)	147679	2q14.2	Cancer	IL1RN	DIRA|ICIL-1RA|IL-1ra3|IL1F3|IL1RA|IRAP|MGC10430|MV	6000	P18510	NP_000568.1:NP_776213.1:NP_776214.1:NP_776215.1:XP_005263718.1:XP_006712560.1
Matrisome-associated	Secreted Factors	IL6	interleukin 6 (interferon, beta 2)	6018	838	Kaposi sarcoma, susceptibility to, 148000 (3)	147620	7p21	Immunological	IL6, IFNB2, BSF2	BSF2|HGF|HSF|IFNB2|IL-6	6018	B4DNQ5:B4DNV3:B5MC14:B5MC21:B5MCZ3:C9J5B0:P05231	NP_000591.1:XP_005249802.1
Matrisome-associated	Secreted Factors	INS	insulin	6081	748	Hyperproinsulinemia, familial (3)	176730	11p15.5	Endocrine	INS	ILPR|IRDN	6081	A6XGL2:C9JNR5:P01308	NP_000198.1:NP_001172026.1:NP_001172027.1:NP_001278826.1
Matrisome-associated	Secreted Factors	INS	insulin	6081	1020	MODY, one form, 125850 (3)	176730	11p15.5	Endocrine	INS	ILPR|IRDN	6081	A6XGL2:C9JNR5:P01308	NP_000198.1:NP_001172026.1:NP_001172027.1:NP_001278826.1
Matrisome-associated	Secreted Factors	INSL3	insulin-like 3 (Leydig cell)	6086	392	Cryptorchidism, idiopathic, 219050 (3)	146738	19p13.2	Renal	INSL3	MGC119818|MGC119819|RLF|RLNL	6086	M0QXQ3:P51460	NP_001252516.1:NP_005534.2
Matrisome-associated	Secreted Factors	LEFTY2	left-right determination factor 2	3122	874	Left-right axis malformations (3)	601877	1q42.1	Developmental	EBAF, TGFB4, LEFTY2, LEFTA,	EBAF|LEFTA|LEFTYA|MGC46222|TGFB4	3122	O00292	NP_001165896.1:NP_003231.2
Matrisome-associated	Secreted Factors	LEP	leptin	6553	1126	Obesity, morbid, with hypogonadism (3)	164160	7q31.3	Nutritional	LEP, OB	FLJ94114|OB|OBS	6553	P41159	NP_000221.1:XP_005250397.1
Matrisome-associated	Secreted Factors	LEP	leptin	6553	1126	Obesity, severe, due to leptin deficiency (3)	164160	7q31.3	Nutritional	LEP, OB	FLJ94114|OB|OBS	6553	P41159	NP_000221.1:XP_005250397.1
Matrisome-associated	Secreted Factors	LTA	lymphotoxin alpha (TNF superfamily, member 1)	6709	1054	Myocardial infarction, susceptibility to (3)	153440	6p21.3	Cardiovascular	LTA, TNFB	LT|TNFB|TNFSF1	6709	P01374	NP_000586.2:NP_001153212.1
Matrisome-associated	Secreted Factors	MSTN	myostatin	4223	1039	Muscle hypertrophy (3)	601788	2q32.2	Muscular	GDF8, MSTN	GDF8	4223	O14793	NP_005250.1
Matrisome-associated	Secreted Factors	NODAL	nodal homolog (mouse)	7865	1399	Situs ambiguus (3)	601265	Chr.10	Developmental	NODAL	MGC138230	7865	H7C0E4:Q96S42	NP_060525.3
Matrisome-associated	Secreted Factors	NRTN	neurturin	8007	681	Hirschsprung disease, 142623 (3)	602018	19p13.3	Gastrointestinal	NRTN, NTN	NTN	8007	Q99748	NP_004549.1
Matrisome-associated	Secreted Factors	PDGFB	platelet-derived growth factor beta polypeptide (simian sarcoma viral (v-sis) oncogene homolog)	8800	422	Dermatofibrosarcoma protuberans (3)	190040	22q12.3-q13.1	Cancer	PDGFB, SIS	FLJ12858|PDGF2|SIS|SSV|c-sis	8800	A9UJN9:A9UJP0:P01127	NP_002599.1:NP_148937.1
Matrisome-associated	Secreted Factors	PDGFB	platelet-derived growth factor beta polypeptide (simian sarcoma viral (v-sis) oncogene homolog)	8800	583	Giant-cell fibroblastoma (3)	190040	22q12.3-q13.1	Cancer	PDGFB, SIS	FLJ12858|PDGF2|SIS|SSV|c-sis	8800	A9UJN9:A9UJP0:P01127	NP_002599.1:NP_148937.1
Matrisome-associated	Secreted Factors	PDGFB	platelet-derived growth factor beta polypeptide (simian sarcoma viral (v-sis) oncogene homolog)	8800	986	Meningioma, SIS-related (3)	190040	22q12.3-q13.1	Cancer	PDGFB, SIS	FLJ12858|PDGF2|SIS|SSV|c-sis	8800	A9UJN9:A9UJP0:P01127	NP_002599.1:NP_148937.1
Matrisome-associated	Secreted Factors	SHH	sonic hedgehog homolog (Drosophila)	10848	345	Coloboma, ocular, 120200 (3)	600725	7q36	Ophthamological	SHH, HPE3, HLP3, SMMCI	HHG1|HLP3|HPE3|MCOPCB5|SMMCI|TPT|TPTPS	10848	C9JC48:F8WB84:F8WEH4:Q15465	NP_000184.1
Matrisome-associated	Secreted Factors	SHH	sonic hedgehog homolog (Drosophila)	10848	689	Holoprosencephaly-3, 142945 (3)	600725	7q36	Developmental	SHH, HPE3, HLP3, SMMCI	HHG1|HLP3|HPE3|MCOPCB5|SMMCI|TPT|TPTPS	10848	C9JC48:F8WB84:F8WEH4:Q15465	NP_000184.1
Matrisome-associated	Secreted Factors	SHH	sonic hedgehog homolog (Drosophila)	10848	1414	Solitary median maxillary central incisor, 147250 (3)	600725	7q36	Skeletal	SHH, HPE3, HLP3, SMMCI	HHG1|HLP3|HPE3|MCOPCB5|SMMCI|TPT|TPTPS	10848	C9JC48:F8WB84:F8WEH4:Q15465	NP_000184.1
Matrisome-associated	Secreted Factors	TDGF1	teratocarcinoma-derived growth factor 1	11701	547	Forebrain defects (3)	187395	3p23-p21	Neurological	TDGF1	CR|CRGF|CRIPTO|Cripto-1	11701	F5H1T8:P13385	NP_001167607.1:NP_001167607.1:NP_003203.1
Matrisome-associated	Secreted Factors	TGFB1	transforming growth factor, beta 1	11766	257	Camurati-Engelmann disease, 131300 (3)	190180	19q13.1	Skeletal	TGFB1, DPD1, CED	CED|DPD1|LAP|TGFB|TGFbeta	11766	M0R2S0:P01137	NP_000651.3
Matrisome-associated	Secreted Factors	THPO	thrombopoietin	11795	1493	Thrombocythemia, essential, 187950 (3)	600044	3q26.3-q27	Hematological	THPO, MGDF, MPLLG, TPO	MGC163194|MGDF|MKCSF|ML|MPLLG|TPO	11795	F8W6L1:P40225	NP_000451.1:NP_001171068.1:NP_001171069.1:NP_001276926.1:NP_001276927.1:NP_001276932.1:NP_001276951.1:NP_001276955.1:NP_001276956.1:NP_001276957.1:NP_001276926.1:NP_001276956.1
Matrisome-associated	Secreted Factors	TNF	tumor necrosis factor (TNF superfamily, member 2)	11892	153	Asthma, susceptibility to, 600807 (3)	191160	6p21.3	Respiratory	TNF, TNFA	DIF|TNF-alpha|TNFA|TNFSF2	11892	P01375	NP_000585.2
Matrisome-associated	Secreted Factors	TNF	tumor necrosis factor (TNF superfamily, member 2)	11892	412	Dementia, vascular, susceptibility to (3)	191160	6p21.3	Neurological	TNF, TNFA	DIF|TNF-alpha|TNFA|TNFSF2	11892	P01375	NP_000585.2
Matrisome-associated	Secreted Factors	TNF	tumor necrosis factor (TNF superfamily, member 2)	11892	940	Malaria, cerebral, susceptibility to (3)	191160	6p21.3	Immunological	TNF, TNFA	DIF|TNF-alpha|TNFA|TNFSF2	11892	P01375	NP_000585.2
Matrisome-associated	Secreted Factors	TNF	tumor necrosis factor (TNF superfamily, member 2)	11892	1013	Migraine without aura, susceptibility to, 157300 (3)	191160	6p21.3	Neurological	TNF, TNFA	DIF|TNF-alpha|TNFA|TNFSF2	11892	P01375	NP_000585.2
Matrisome-associated	Secreted Factors	TNF	tumor necrosis factor (TNF superfamily, member 2)	11892	1378	Septic shock, susceptibility to (3)	191160	6p21.3	Immunological	TNF, TNFA	DIF|TNF-alpha|TNFA|TNFSF2	11892	P01375	NP_000585.2
Matrisome-associated	Secreted Factors	TNFSF4	tumor necrosis factor (ligand) superfamily, member 4	11934	1054	Myocardial infarction, susceptibility to, 608446 (3)	603594	1q25	Cardiovascular	TNFSF4, GP34, OX4OL	CD134L|CD252|GP34|OX-40L|OX4OL|TXGP1	11934	P23510:Q8IV74	NP_003317.1:XP_005245532.1
Matrisome-associated	Secreted Factors	TPO	thyroid peroxidase	12015	617	Goiter, congenital (3)	606765	2p25	Endocrine	TPO, TPX	MSA|TDH2A|TPX	12015	C9J511:C9JFW0:E9PFM6:H0Y6H4:H7BZH8:H7C1F5:H7C5B6:P07202	NP_000538.3:NP_001193673.1:NP_001193674.1:NP_783650.1:NP_783652.1:NP_783653.1
Matrisome-associated	Secreted Factors	TPO	thyroid peroxidase	12015	755	Hyperthyroidism, congenital (3)	606765	2p25	Endocrine	TPO, TPX	MSA|TDH2A|TPX	12015	C9J511:C9JFW0:E9PFM6:H0Y6H4:H7BZH8:H7C1F5:H7C5B6:P07202	NP_000538.3:NP_001193673.1:NP_001193674.1:NP_783650.1:NP_783652.1:NP_783653.1
Matrisome-associated	Secreted Factors	TPO	thyroid peroxidase	12015	1493	Thrombocythemia, essential, 187950 (3)	600044	3q26.3-q27	Hematological	THPO, MGDF, MPLLG, TPO	MSA|TDH2A|TPX	12015	C9J511:C9JFW0:E9PFM6:H0Y6H4:H7BZH8:H7C1F5:H7C5B6:P07202	NP_000538.3:NP_001193673.1:NP_001193674.1:NP_783650.1:NP_783652.1:NP_783653.1
Matrisome-associated	Secreted Factors	TPO	thyroid peroxidase	12015	3503	Thyroid hormone organification defect IIA, 274500 (3)	606765	2p25	Endocrine	TPO, TPX	MSA|TDH2A|TPX	12015	C9J511:C9JFW0:E9PFM6:H0Y6H4:H7BZH8:H7C1F5:H7C5B6:P07202	NP_000538.3:NP_001193673.1:NP_001193674.1:NP_783650.1:NP_783652.1:NP_783653.1
Matrisome-associated	Secreted Factors	TPO	thyroid peroxidase	12015	3512	Total iodide organification defect, 274500 (3)	606765	2p25	Endocrine	TPO, TPX	MSA|TDH2A|TPX	12015	C9J511:C9JFW0:E9PFM6:H0Y6H4:H7BZH8:H7C1F5:H7C5B6:P07202	NP_000538.3:NP_001193673.1:NP_001193674.1:NP_783650.1:NP_783652.1:NP_783653.1
Matrisome-associated	Secreted Factors	WNT3	wingless-type MMTV integration site family, member 3	12782	1482	Tetra-amelia, autosomal recessive, 273395 (3)	165330	17q21	multiple	WNT3, INT4	INT4|MGC131950|MGC138321|MGC138323	12782	P56703	NP_110380.1
Matrisome-associated	Secreted Factors	WNT4	wingless-type MMTV integration site family, member 4	12783	1337	Rokitansky-Kuster-Hauser syndrome, 277000 (3)	603490	1p35	Developmental	WNT4	SERKAL|WNT-4	12783	B1AJZ6:H0Y663:P56705	NP_110388.2:XP_005245954.1
