# Supplementary material for: The Human Extracellular Matrix Diseasome Reveals Genotype–Phenotype Associations with Clinical Implications for Age-Related Diseases
Source: Biomedicines. 2023 Apr 19;11(4):1212. doi: 10.3390/biomedicines11041212 (PMC10135578; doi:10.3390/biomedicines11041212)
Supplement: Supplementary file 1 [file biomedicines-11-01212-s001.zip › Table_S5_Clinical Variant Matrisome data table.csv]

division	category	Gene Symbol	Gene Name	geneid	Polymorphism	Description A	Description B	ID	Synonyms	HGNC_IDs Links	UniProt_IDs	Refseq_IDs
Core matrisome	Collagens	COL10A1	collagen, type X, alpha 1	2185	p.CYS591ARG	Metaphyseal chondrodysplasia\x2c Schmid type(ClinVar)	Metaphyseal chondrodysplasia, Schmid	C1413569	-	2185	Q03692:Q5QPC7:Q5QPC8	NP_000484.2:XP_006715395.1:XP_006715396.1
Core matrisome	Collagens	COL10A1	collagen, type X, alpha 1	2185	p.GLY18ARG	Metaphyseal chondrodysplasia\x2c Schmid type(ClinVar)	Metaphyseal chondrodysplasia, Schmid	C1413569	-	2185	Q03692:Q5QPC7:Q5QPC8	NP_000484.2:XP_006715395.1:XP_006715396.1
Core matrisome	Collagens	COL10A1	collagen, type X, alpha 1	2185	p.GLY18GLU	Metaphyseal chondrodysplasia\x2c Schmid type(ClinVar)	Metaphyseal chondrodysplasia, Schmid	C1413569	-	2185	Q03692:Q5QPC7:Q5QPC8	NP_000484.2:XP_006715395.1:XP_006715396.1
Core matrisome	Collagens	COL10A1	collagen, type X, alpha 1	2185	p.GLY595GLU	Metaphyseal chondrodysplasia\x2c Schmid type(ClinVar)	Metaphyseal chondrodysplasia, Schmid	C1413569	-	2185	Q03692:Q5QPC7:Q5QPC8	NP_000484.2:XP_006715395.1:XP_006715396.1
Core matrisome	Collagens	COL10A1	collagen, type X, alpha 1	2185	p.LEU614PRO	Metaphyseal chondrodysplasia\x2c Schmid type(ClinVar)	Metaphyseal chondrodysplasia, Schmid	C1413569	-	2185	Q03692:Q5QPC7:Q5QPC8	NP_000484.2:XP_006715395.1:XP_006715396.1
Core matrisome	Collagens	COL10A1	collagen, type X, alpha 1	2185	p.SER600PRO	Metaphyseal chondrodysplasia\x2c Schmid type(ClinVar)	Metaphyseal chondrodysplasia, Schmid	C1413569	-	2185	Q03692:Q5QPC7:Q5QPC8	NP_000484.2:XP_006715395.1:XP_006715396.1
Core matrisome	Collagens	COL10A1	collagen, type X, alpha 1	2185	p.SER671PRO	Metaphyseal chondrodysplasia\x2c Schmid type(ClinVar)	Metaphyseal chondrodysplasia, Schmid	C1413569	-	2185	Q03692:Q5QPC7:Q5QPC8	NP_000484.2:XP_006715395.1:XP_006715396.1
Core matrisome	Collagens	COL10A1	collagen, type X, alpha 1	2185	p.TRP611TER	Metaphyseal chondrodysplasia\x2c Schmid type(ClinVar)	Metaphyseal chondrodysplasia, Schmid	C1413569	-	2185	Q03692:Q5QPC7:Q5QPC8	NP_000484.2:XP_006715395.1:XP_006715396.1
Core matrisome	Collagens	COL10A1	collagen, type X, alpha 1	2185	p.TRP651ARG	Metaphyseal chondrodysplasia\x2c Schmid type(ClinVar)	Metaphyseal chondrodysplasia, Schmid	C1413569	-	2185	Q03692:Q5QPC7:Q5QPC8	NP_000484.2:XP_006715395.1:XP_006715396.1
Core matrisome	Collagens	COL10A1	collagen, type X, alpha 1	2185	p.TRP651TER	Metaphyseal chondrodysplasia\x2c Schmid type(ClinVar)	Metaphyseal chondrodysplasia, Schmid	C1413569	-	2185	Q03692:Q5QPC7:Q5QPC8	NP_000484.2:XP_006715395.1:XP_006715396.1
Core matrisome	Collagens	COL10A1	collagen, type X, alpha 1	2185	p.TYR597CYS	Metaphyseal chondrodysplasia\x2c Schmid type(ClinVar)	Metaphyseal chondrodysplasia, Schmid	C1413569	-	2185	Q03692:Q5QPC7:Q5QPC8	NP_000484.2:XP_006715395.1:XP_006715396.1
Core matrisome	Collagens	COL10A1	collagen, type X, alpha 1	2185	p.TYR598ASP	Metaphyseal chondrodysplasia\x2c Schmid type(ClinVar)	Metaphyseal chondrodysplasia, Schmid	C1413569	-	2185	Q03692:Q5QPC7:Q5QPC8	NP_000484.2:XP_006715395.1:XP_006715396.1
Core matrisome	Collagens	COL10A1	collagen, type X, alpha 1	2185	p.TYR628TER	Metaphyseal chondrodysplasia\x2c Schmid type(ClinVar)	Metaphyseal chondrodysplasia, Schmid	C1413569	-	2185	Q03692:Q5QPC7:Q5QPC8	NP_000484.2:XP_006715395.1:XP_006715396.1
Core matrisome	Collagens	COL10A1	collagen, type X, alpha 1	2185	p.TYR632TER	Metaphyseal chondrodysplasia\x2c Schmid type(ClinVar)	Metaphyseal chondrodysplasia, Schmid	C1413569	-	2185	Q03692:Q5QPC7:Q5QPC8	NP_000484.2:XP_006715395.1:XP_006715396.1
Core matrisome	Collagens	COL11A1	collagen, type XI, alpha 1	2186	p.GLY625VAL	Stickler syndrome\x2c type 2(ClinVar)	Stickler syndrome	C0265253;C2020284	CO11A1|COLL6|STL2	2186	C9JMN2:H7C381:P12107	NP_001177638.1:NP_001845.3:NP_542196.2:NP_542197.3
Core matrisome	Collagens	COL11A1	collagen, type XI, alpha 1	2186	p.GLY988VAL	Marshall/Stickler syndrome(ClinVar)	MARSHALL/STICKLER SYNDROME	C4015965	CO11A1|COLL6|STL2	2186	C9JMN2:H7C381:P12107	NP_001177638.1:NP_001845.3:NP_542196.2:NP_542197.3
Core matrisome	Collagens	COL11A2	collagen, type XI, alpha 2	2187	p.ARG1331TER	Weissenbacher-Zweymuller syndrome\x2c autosomal recessive(ClinVar)	Otospondylomegaepiphyseal dysplasia	C1855310	DFNA13|DFNB53|HKE5|PARP|STL3	2187	A2AAS7:H0Y3B3:H0Y3B5:H0Y3M9:H0YHM5:H0YHM9:H0YIS1:P13942:Q4VXY6	NP_001157243.1:NP_542411.2:NP_542412.2:NP_542410.2:NP_542412.2
Core matrisome	Collagens	COL11A2	collagen, type XI, alpha 2	2187	p.ARG1379TER	Stickler syndrome\x2c type 3(ClinVar)	Stickler syndrome, type 3	C1861481	DFNA13|DFNB53|HKE5|PARP|STL3	2187	A2AAS7:H0Y3B3:H0Y3B5:H0Y3M9:H0YHM5:H0YHM9:H0YIS1:P13942:Q4VXY6	NP_001157243.1:NP_542411.2:NP_542412.2:NP_542410.2:NP_542412.2
Core matrisome	Collagens	COL11A2	collagen, type XI, alpha 2	2187	p.GLY1441GLU	Weissenbacher-Zweymuller syndrome|Otospondylomegaepiphyseal dysplasia\x2c heterozygous(ClinVar)	WZS	C1848488	DFNA13|DFNB53|HKE5|PARP|STL3	2187	A2AAS7:H0Y3B3:H0Y3B5:H0Y3M9:H0YHM5:H0YHM9:H0YIS1:P13942:Q4VXY6	NP_001157243.1:NP_542411.2:NP_542412.2:NP_542410.2:NP_542412.2
Core matrisome	Collagens	COL11A2	collagen, type XI, alpha 2	2187	p.GLY661ARG	Otospondylomegaepiphyseal dysplasia(ClinVar)	OSMED	C1855310	DFNA13|DFNB53|HKE5|PARP|STL3	2187	A2AAS7:H0Y3B3:H0Y3B5:H0Y3M9:H0YHM5:H0YHM9:H0YIS1:P13942:Q4VXY6	NP_001157243.1:NP_542411.2:NP_542412.2:NP_542410.2:NP_542412.2
Core matrisome	Collagens	COL11A2	collagen, type XI, alpha 2	2187	p.PRO621THR	Deafness\x2c autosomal recessive 53(ClinVar)	DFNB53	C1864746	DFNA13|DFNB53|HKE5|PARP|STL3	2187	A2AAS7:H0Y3B3:H0Y3B5:H0Y3M9:H0YHM5:H0YHM9:H0YIS1:P13942:Q4VXY6	NP_001157243.1:NP_542411.2:NP_542412.2:NP_542410.2:NP_542412.2
Core matrisome	Collagens	COL11A2	collagen, type XI, alpha 2	2187	p.SER831LEU	Otospondylomegaepiphyseal dysplasia(ClinVar)	Otospondylomegaepiphyseal dysplasia	C1855310	DFNA13|DFNB53|HKE5|PARP|STL3	2187	A2AAS7:H0Y3B3:H0Y3B5:H0Y3M9:H0YHM5:H0YHM9:H0YIS1:P13942:Q4VXY6	NP_001157243.1:NP_542411.2:NP_542412.2:NP_542410.2:NP_542412.2
Core matrisome	Collagens	COL17A1	collagen, type XVII, alpha 1	2194	p.ARG1226TER	Adult junctional epidermolysis bullosa|Epidermolysis bullosa\x2c junctional\x2c localisata variant(ClinVar)	Adult junctional epidermolysis bullosa	C0268374	BA16H23.2|BP180|BPAG2|FLJ60881|KIAA0204|LAD-1	2194	A2A2Y8:H0Y420:Q9UMD9	NP_000485.3
Core matrisome	Collagens	COL17A1	collagen, type XVII, alpha 1	2194	p.ARG1303GLN	Epidermolysis bullosa\x2c junctional\x2c localisata variant(ClinVar)	Epidermolysis bullosa, junctional	C0079301	BA16H23.2|BP180|BPAG2|FLJ60881|KIAA0204|LAD-1	2194	A2A2Y8:H0Y420:Q9UMD9	NP_000485.3
Core matrisome	Collagens	COL17A1	collagen, type XVII, alpha 1	2194	p.ARG145TER	Adult junctional epidermolysis bullosa(ClinVar)	Adult junctional epidermolysis bullosa	C0268374	BA16H23.2|BP180|BPAG2|FLJ60881|KIAA0204|LAD-1	2194	A2A2Y8:H0Y420:Q9UMD9	NP_000485.3
Core matrisome	Collagens	COL17A1	collagen, type XVII, alpha 1	2194	p.GLN1023TER	Adult junctional epidermolysis bullosa(ClinVar)	Adult junctional epidermolysis bullosa	C0268374	BA16H23.2|BP180|BPAG2|FLJ60881|KIAA0204|LAD-1	2194	A2A2Y8:H0Y420:Q9UMD9	NP_000485.3
Core matrisome	Collagens	COL17A1	collagen, type XVII, alpha 1	2194	p.GLY633ASP	Adult junctional epidermolysis bullosa(ClinVar)	Adult junctional epidermolysis bullosa	C0268374	BA16H23.2|BP180|BPAG2|FLJ60881|KIAA0204|LAD-1	2194	A2A2Y8:H0Y420:Q9UMD9	NP_000485.3
Core matrisome	Collagens	COL17A1	collagen, type XVII, alpha 1	2194	p.LEU855TER	Adult junctional epidermolysis bullosa(ClinVar)	Adult junctional epidermolysis bullosa	C0268374	BA16H23.2|BP180|BPAG2|FLJ60881|KIAA0204|LAD-1	2194	A2A2Y8:H0Y420:Q9UMD9	NP_000485.3
Core matrisome	Collagens	COL18A1	collagen, type XVIII, alpha 1	2195	p.ASP1437ASN	Knobloch syndrome 1(ClinVar)	Knobloch syndrome 1	C1849409	FLJ27325|FLJ34914|KNO|KNO1|MGC74745	2195	H7BXV5:H7C457:P39060	NP_085059.2:NP_569712.2
Core matrisome	Collagens	COL1A1	collagen, type I, alpha 1	2197	p.ALA348THR	Osteogenesis imperfecta(ClinVar)	Osteogenesis imperfecta	C0029434	OI4	2197	I3L3H7:P02452	NP_000079.2
Core matrisome	Collagens	COL1A1	collagen, type I, alpha 1	2197	p.ARG1014CYS	Infantile cortical hyperostosis|Prenatal cortical hyperostosis\x2c lethal(ClinVar)	Caffey disease	C0020497	OI4	2197	I3L3H7:P02452	NP_000079.2
Core matrisome	Collagens	COL1A1	collagen, type I, alpha 1	2197	p.ARG1141TER	Osteogenesis imperfecta type I(ClinVar)	Osteogenesis imperfecta type I	C0023931	OI4	2197	I3L3H7:P02452	NP_000079.2
Core matrisome	Collagens	COL1A1	collagen, type I, alpha 1	2197	p.ARG312CYS	Ehlers-Danlos syndrome\x2c type 1(ClinVar)	Ehlers-Danlos syndrome	C0013720	OI4	2197	I3L3H7:P02452	NP_000079.2
Core matrisome	Collagens	COL1A1	collagen, type I, alpha 1	2197	p.ARG528HIS	Osteogenesis imperfecta(ClinVar)	Osteogenesis imperfecta	C0029434	OI4	2197	I3L3H7:P02452	NP_000079.2
Core matrisome	Collagens	COL1A1	collagen, type I, alpha 1	2197	p.ARG865HIS	Osteogenesis imperfecta(ClinVar)	Osteogenesis imperfecta	C0029434	OI4	2197	I3L3H7:P02452	NP_000079.2
Core matrisome	Collagens	COL1A1	collagen, type I, alpha 1	2197	p.GLN688TER	Osteogenesis imperfecta(ClinVar)	Osteogenesis imperfecta	C0029434	OI4	2197	I3L3H7:P02452	NP_000079.2
Core matrisome	Collagens	COL1A1	collagen, type I, alpha 1	2197	p.GLN721TER	Osteogenesis imperfecta(ClinVar)	Osteogenesis imperfecta	C0029434	OI4	2197	I3L3H7:P02452	NP_000079.2
Core matrisome	Collagens	COL1A1	collagen, type I, alpha 1	2197	p.GLN966ARG	Osteogenesis imperfecta(ClinVar)	Osteogenesis imperfecta	C0029434	OI4	2197	I3L3H7:P02452	NP_000079.2
Core matrisome	Collagens	COL1A1	collagen, type I, alpha 1	2197	p.GLY1010SER	Osteogenesis imperfecta with normal sclerae\x2c dominant form(ClinVar)	OI4	C0268363;C1332772;C1704810;C1704811	OI4	2197	I3L3H7:P02452	NP_000079.2
Core matrisome	Collagens	COL1A1	collagen, type I, alpha 1	2197	p.GLY1022SER	Osteogenesis imperfecta type III(ClinVar)	Osteogenesis imperfecta III	C0268362	OI4	2197	I3L3H7:P02452	NP_000079.2
Core matrisome	Collagens	COL1A1	collagen, type I, alpha 1	2197	p.GLY1025ARG	Osteogenesis imperfecta\x2c recessive perinatal lethal(ClinVar)	OI2	C0268358	OI4	2197	I3L3H7:P02452	NP_000079.2
Core matrisome	Collagens	COL1A1	collagen, type I, alpha 1	2197	p.GLY1040SER	Osteogenesis imperfecta type III(ClinVar)	OI2	C0268358	OI4	2197	I3L3H7:P02452	NP_000079.2
Core matrisome	Collagens	COL1A1	collagen, type I, alpha 1	2197	p.GLY1061ASP	Osteogenesis imperfecta\x2c recessive perinatal lethal(ClinVar)	OI2	C0268358	OI4	2197	I3L3H7:P02452	NP_000079.2
Core matrisome	Collagens	COL1A1	collagen, type I, alpha 1	2197	p.GLY1079SER	Osteogenesis imperfecta type I(ClinVar)	OI1	C0023931	OI4	2197	I3L3H7:P02452	NP_000079.2
Core matrisome	Collagens	COL1A1	collagen, type I, alpha 1	2197	p.GLY1082CYS	Osteogenesis imperfecta\x2c recessive perinatal lethal(ClinVar)	OI2	C0268358	OI4	2197	I3L3H7:P02452	NP_000079.2
Core matrisome	Collagens	COL1A1	collagen, type I, alpha 1	2197	p.GLY1091SER	Osteogenesis imperfecta\x2c recessive perinatal lethal(ClinVar)	OI2	C0268358	OI4	2197	I3L3H7:P02452	NP_000079.2
Core matrisome	Collagens	COL1A1	collagen, type I, alpha 1	2197	p.GLY1151VAL	Osteogenesis imperfecta\x2c recessive perinatal lethal(ClinVar)	OI2	C0268358	OI4	2197	I3L3H7:P02452	NP_000079.2
Core matrisome	Collagens	COL1A1	collagen, type I, alpha 1	2197	p.GLY1166CYS	Osteogenesis imperfecta\x2c recessive perinatal lethal(ClinVar)	OI2	C0268358	OI4	2197	I3L3H7:P02452	NP_000079.2
Core matrisome	Collagens	COL1A1	collagen, type I, alpha 1	2197	p.GLY1181SER	Osteogenesis imperfecta\x2c recessive perinatal lethal(ClinVar)	Osteogenesis imperfecta III	C0268362	OI4	2197	I3L3H7:P02452	NP_000079.2
Core matrisome	Collagens	COL1A1	collagen, type I, alpha 1	2197	p.GLY1184VAL	OSTEOGENESIS IMPERFECTA\x2c TYPE IIC(ClinVar)	OI2	C0268358	OI4	2197	I3L3H7:P02452	NP_000079.2
Core matrisome	Collagens	COL1A1	collagen, type I, alpha 1	2197	p.GLY1187SER	Osteogenesis imperfecta\x2c recessive perinatal lethal(ClinVar)	Osteogenesis imperfecta III	C0268362	OI4	2197	I3L3H7:P02452	NP_000079.2
Core matrisome	Collagens	COL1A1	collagen, type I, alpha 1	2197	p.GLY173TER	Osteogenesis imperfecta(ClinVar)	Osteogenesis imperfecta	C0029434	OI4	2197	I3L3H7:P02452	NP_000079.2
Core matrisome	Collagens	COL1A1	collagen, type I, alpha 1	2197	p.GLY221CYS	Osteopenic nonfracture syndrome(ClinVar)	OI1	C0023931	OI4	2197	I3L3H7:P02452	NP_000079.2
Core matrisome	Collagens	COL1A1	collagen, type I, alpha 1	2197	p.GLY254GLU	Osteogenesis imperfecta type III(ClinVar)	Osteogenesis imperfecta III	C0268362	OI4	2197	I3L3H7:P02452	NP_000079.2
Core matrisome	Collagens	COL1A1	collagen, type I, alpha 1	2197	p.GLY272CYS	Osteogenesis imperfecta type I(ClinVar)	OI1	C0023931	OI4	2197	I3L3H7:P02452	NP_000079.2
Core matrisome	Collagens	COL1A1	collagen, type I, alpha 1	2197	p.GLY275ASP	Osteogenesis imperfecta\x2c recessive perinatal lethal(ClinVar)	OI2	C0268358	OI4	2197	I3L3H7:P02452	NP_000079.2
Core matrisome	Collagens	COL1A1	collagen, type I, alpha 1	2197	p.GLY332ARG	Osteogenesis imperfecta type III|Osteogenesis imperfecta(ClinVar)	Osteogenesis imperfecta III	C0268362	OI4	2197	I3L3H7:P02452	NP_000079.2
Core matrisome	Collagens	COL1A1	collagen, type I, alpha 1	2197	p.GLY341CYS	Osteogenesis imperfecta(ClinVar)	Osteogenesis imperfecta	C0029434	OI4	2197	I3L3H7:P02452	NP_000079.2
Core matrisome	Collagens	COL1A1	collagen, type I, alpha 1	2197	p.GLY353CYS	Osteogenesis imperfecta with normal sclerae\x2c dominant form,.(ClinVar)	OI4	C0268363;C1332772;C1704810;C1704811	OI4	2197	I3L3H7:P02452	NP_000079.2
Core matrisome	Collagens	COL1A1	collagen, type I, alpha 1	2197	p.GLY356CYS	Osteogenesis imperfecta type I(ClinVar)	OI4	C0268363;C1332772;C1704810;C1704811	OI4	2197	I3L3H7:P02452	NP_000079.2
Core matrisome	Collagens	COL1A1	collagen, type I, alpha 1	2197	p.GLY434VAL	Osteogenesis imperfecta\x2c recessive perinatal lethal(ClinVar)	OI2	C0268358	OI4	2197	I3L3H7:P02452	NP_000079.2
Core matrisome	Collagens	COL1A1	collagen, type I, alpha 1	2197	p.GLY515ALA	Osteogenesis imperfecta(ClinVar)	Osteogenesis imperfecta	C0029434	OI4	2197	I3L3H7:P02452	NP_000079.2
Core matrisome	Collagens	COL1A1	collagen, type I, alpha 1	2197	p.GLY530CYS	.,Osteogenesis imperfecta type III(ClinVar)	Osteogenesis imperfecta type III	C0268362	OI4	2197	I3L3H7:P02452	NP_000079.2
Core matrisome	Collagens	COL1A1	collagen, type I, alpha 1	2197	p.GLY533ASP	Osteogenesis imperfecta\x2c recessive perinatal lethal(ClinVar)	OI2	C0268358	OI4	2197	I3L3H7:P02452	NP_000079.2
Core matrisome	Collagens	COL1A1	collagen, type I, alpha 1	2197	p.GLY569ARG	Osteogenesis imperfecta\x2c recessive perinatal lethal(ClinVar)	OI2	C0268358	OI4	2197	I3L3H7:P02452	NP_000079.2
Core matrisome	Collagens	COL1A1	collagen, type I, alpha 1	2197	p.GLY593CYS	OSTEOGENESIS IMPERFECTA\x2c TYPE III/IV,Osteogenesis imperfecta\x2c recessive perinatal lethal(ClinVar)	OI3	C0268362	OI4	2197	I3L3H7:P02452	NP_000079.2
Core matrisome	Collagens	COL1A1	collagen, type I, alpha 1	2197	p.GLY704CYS	Osteogenesis imperfecta type III,.(ClinVar)	Osteogenesis imperfecta III	C0268362	OI4	2197	I3L3H7:P02452	NP_000079.2
Core matrisome	Collagens	COL1A1	collagen, type I, alpha 1	2197	p.GLY719ASP	Osteogenesis imperfecta\x2c recessive perinatal lethal(ClinVar)	OI2	C0268358	OI4	2197	I3L3H7:P02452	NP_000079.2
Core matrisome	Collagens	COL1A1	collagen, type I, alpha 1	2197	p.GLY737ASP	Osteogenesis imperfecta\x2c recessive perinatal lethal(ClinVar)	OI2	C0268358	OI4	2197	I3L3H7:P02452	NP_000079.2
Core matrisome	Collagens	COL1A1	collagen, type I, alpha 1	2197	p.GLY743VAL	Osteogenesis imperfecta\x2c recessive perinatal lethal(ClinVar)	OI2	C0268358	OI4	2197	I3L3H7:P02452	NP_000079.2
Core matrisome	Collagens	COL1A1	collagen, type I, alpha 1	2197	p.GLY764VAL	Osteogenesis imperfecta\x2c recessive perinatal lethal(ClinVar)	OI2	C0268358	OI4	2197	I3L3H7:P02452	NP_000079.2
Core matrisome	Collagens	COL1A1	collagen, type I, alpha 1	2197	p.GLY815VAL	Osteogenesis imperfecta\x2c recessive perinatal lethal,.(ClinVar)	OI2	C0268358	OI4	2197	I3L3H7:P02452	NP_000079.2
Core matrisome	Collagens	COL1A1	collagen, type I, alpha 1	2197	p.GLY839SER	Osteogenesis imperfecta type III(ClinVar)	OI2	C0268358	OI4	2197	I3L3H7:P02452	NP_000079.2
Core matrisome	Collagens	COL1A1	collagen, type I, alpha 1	2197	p.GLY845ARG	Osteogenesis imperfecta\x2c recessive perinatal lethal(ClinVar)	OI2	C0268358	OI4	2197	I3L3H7:P02452	NP_000079.2
Core matrisome	Collagens	COL1A1	collagen, type I, alpha 1	2197	p.GLY851ASP	Osteogenesis imperfecta\x2c recessive perinatal lethal(ClinVar)	OI2	C0268358	OI4	2197	I3L3H7:P02452	NP_000079.2
Core matrisome	Collagens	COL1A1	collagen, type I, alpha 1	2197	p.GLY869CYS	Osteogenesis imperfecta\x2c recessive perinatal lethal(ClinVar)	OI2	C0268358	OI4	2197	I3L3H7:P02452	NP_000079.2
Core matrisome	Collagens	COL1A1	collagen, type I, alpha 1	2197	p.GLY896CYS	Osteogenesis imperfecta\x2c recessive perinatal lethal(ClinVar)	OI2	C0268358	OI4	2197	I3L3H7:P02452	NP_000079.2
Core matrisome	Collagens	COL1A1	collagen, type I, alpha 1	2197	p.GLY926CYS	Osteogenesis imperfecta\x2c recessive perinatal lethal(ClinVar)	OI2	C0268358	OI4	2197	I3L3H7:P02452	NP_000079.2
Core matrisome	Collagens	COL1A1	collagen, type I, alpha 1	2197	p.GLY980VAL	Osteogenesis imperfecta\x2c recessive perinatal lethal(ClinVar)	OI2	C0268358	OI4	2197	I3L3H7:P02452	NP_000079.2
Core matrisome	Collagens	COL1A1	collagen, type I, alpha 1	2197	p.LEU1464PRO	Osteogenesis imperfecta type III(ClinVar)	Osteogenesis imperfecta III	C0268362	OI4	2197	I3L3H7:P02452	NP_000079.2
Core matrisome	Collagens	COL1A1	collagen, type I, alpha 1	2197	p.PRO412ARG	Osteogenesis imperfecta(ClinVar)	Osteogenesis imperfecta	C0029434	OI4	2197	I3L3H7:P02452	NP_000079.2
Core matrisome	Collagens	COL1A1	collagen, type I, alpha 1	2197	p.PRO978SER	Osteogenesis imperfecta(ClinVar)	Osteogenesis imperfecta	C0029434	OI4	2197	I3L3H7:P02452	NP_000079.2
Core matrisome	Collagens	COL1A1	collagen, type I, alpha 1	2197	p.TRP1312CYS	OSTEOGENESIS IMPERFECTA\x2c TYPE II\x2c THIN-BONE TYPE(ClinVar)	OI2	C0268358	OI4	2197	I3L3H7:P02452	NP_000079.2
Core matrisome	Collagens	COL1A2	collagen, type I, alpha 2	2198	p.ALA1119PRO	Osteogenesis imperfecta(ClinVar)	Osteogenesis imperfecta	C0029434	OI4	2198	P08123	NP_000080.2
Core matrisome	Collagens	COL1A2	collagen, type I, alpha 2	2198	p.ARG432GLN	Osteogenesis imperfecta(ClinVar)	Osteogenesis imperfecta	C0029434	OI4	2198	P08123	NP_000080.2
Core matrisome	Collagens	COL1A2	collagen, type I, alpha 2	2198	p.GLU1201TER	Ehlers-Danlos syndrome\x2c autosomal recessive\x2c cardiac valvular form(ClinVar)	EHLERS-DANLOS SYNDROME, AUTOSOMAL RECESSIVE, CARDIAC VALVULAR FORM	C1857034	OI4	2198	P08123	NP_000080.2
Core matrisome	Collagens	COL1A2	collagen, type I, alpha 2	2198	p.GLY1006ALA	Osteogenesis imperfecta type III(ClinVar)	Osteogenesis imperfecta type III	C0268362	OI4	2198	P08123	NP_000080.2
Core matrisome	Collagens	COL1A2	collagen, type I, alpha 2	2198	p.GLY1012SER	.,Osteogenesis imperfecta with normal sclerae\x2c dominant form(ClinVar)	OI3	C0268362	OI4	2198	P08123	NP_000080.2
Core matrisome	Collagens	COL1A2	collagen, type I, alpha 2	2198	p.GLY1090ASP	Osteogenesis imperfecta type III(ClinVar)	Osteogenesis imperfecta III	C0268362	OI4	2198	P08123	NP_000080.2
Core matrisome	Collagens	COL1A2	collagen, type I, alpha 2	2198	p.GLY1099ARG	Osteogenesis imperfecta type III(ClinVar)	Osteogenesis imperfecta III	C0268362	OI4	2198	P08123	NP_000080.2
Core matrisome	Collagens	COL1A2	collagen, type I, alpha 2	2198	p.GLY226ASP	Osteogenesis imperfecta(ClinVar)	Osteogenesis imperfecta	C0029434	OI4	2198	P08123	NP_000080.2
Core matrisome	Collagens	COL1A2	collagen, type I, alpha 2	2198	p.GLY259CYS	Osteogenesis imperfecta\x2c recessive perinatal lethal(ClinVar)	Osteogenesis imperfecta, recessive perinatal lethal	C0268360	OI4	2198	P08123	NP_000080.2
Core matrisome	Collagens	COL1A2	collagen, type I, alpha 2	2198	p.GLY367TRP	Osteogenesis imperfecta type III(ClinVar)	Osteogenesis imperfecta III	C0268362	OI4	2198	P08123	NP_000080.2
Core matrisome	Collagens	COL1A2	collagen, type I, alpha 2	2198	p.GLY379ALA	Osteogenesis imperfecta with normal sclerae\x2c dominant form(ClinVar)	Osteogenesis imperfecta with normal sclerae, dominant form	C0268363	OI4	2198	P08123	NP_000080.2
Core matrisome	Collagens	COL1A2	collagen, type I, alpha 2	2198	p.GLY421ASP	Osteogenesis imperfecta\x2c recessive perinatal lethal(ClinVar)	Osteogenesis imperfecta, recessive perinatal lethal	C0268360	OI4	2198	P08123	NP_000080.2
Core matrisome	Collagens	COL1A2	collagen, type I, alpha 2	2198	p.GLY472CYS	Osteogenesis imperfecta\x2c recessive perinatal lethal(ClinVar)	Osteogenesis imperfecta, recessive perinatal lethal	C0268360	OI4	2198	P08123	NP_000080.2
Core matrisome	Collagens	COL1A2	collagen, type I, alpha 2	2198	p.GLY502SER	Osteogenesis imperfecta\x2c recessive perinatal lethal(ClinVar)	Osteogenesis imperfecta, recessive perinatal lethal	C0268360	OI4	2198	P08123	NP_000080.2
Core matrisome	Collagens	COL1A2	collagen, type I, alpha 2	2198	p.GLY547ASP	Osteogenesis imperfecta\x2c recessive perinatal lethal(ClinVar)	Osteogenesis imperfecta, recessive perinatal lethal	C0268360	OI4	2198	P08123	NP_000080.2
Core matrisome	Collagens	COL1A2	collagen, type I, alpha 2	2198	p.GLY580ASP	Osteogenesis imperfecta\x2c recessive perinatal lethal(ClinVar)	Osteogenesis imperfecta, recessive perinatal lethal	C0268360	OI4	2198	P08123	NP_000080.2
Core matrisome	Collagens	COL1A2	collagen, type I, alpha 2	2198	p.GLY586VAL	Osteogenesis imperfecta with normal sclerae\x2c dominant form|Osteogenesis imperfecta type III(ClinVar)	Osteogenesis imperfecta with normal sclerae, dominant form	C0268363	OI4	2198	P08123	NP_000080.2
Core matrisome	Collagens	COL1A2	collagen, type I, alpha 2	2198	p.GLY625SER	Osteogenesis imperfecta(ClinVar)	Osteogenesis imperfecta	C0029434	OI4	2198	P08123	NP_000080.2
Core matrisome	Collagens	COL1A2	collagen, type I, alpha 2	2198	p.GLY646CYS	Osteogenesis imperfecta with normal sclerae\x2c dominant form(ClinVar)	Osteogenesis imperfecta with normal sclerae, dominant form	C0268363	OI4	2198	P08123	NP_000080.2
Core matrisome	Collagens	COL1A2	collagen, type I, alpha 2	2198	p.GLY661SER	Osteoporosis(ClinVar)	Osteoporosis	C0029456;C1962963;C2911643	OI4	2198	P08123	NP_000080.2
Core matrisome	Collagens	COL1A2	collagen, type I, alpha 2	2198	p.GLY694ARG	Osteogenesis imperfecta\x2c recessive perinatal lethal(ClinVar)	Osteogenesis imperfecta, recessive perinatal lethal	C0268360	OI4	2198	P08123	NP_000080.2
Core matrisome	Collagens	COL1A2	collagen, type I, alpha 2	2198	p.GLY751SER	Osteogenesis imperfecta type III(ClinVar)	OI4	C0268363;C1332772;C1704810;C1704811	OI4	2198	P08123	NP_000080.2
Core matrisome	Collagens	COL1A2	collagen, type I, alpha 2	2198	p.GLY805ASP	Osteogenesis imperfecta\x2c recessive perinatal lethal(ClinVar)	Osteogenesis imperfecta, recessive perinatal lethal	C0268360	OI4	2198	P08123	NP_000080.2
Core matrisome	Collagens	COL1A2	collagen, type I, alpha 2	2198	p.GLY859SER	Osteogenesis imperfecta type III(ClinVar)	Osteogenesis imperfecta type III	C0268362	OI4	2198	P08123	NP_000080.2
Core matrisome	Collagens	COL1A2	collagen, type I, alpha 2	2198	p.GLY865SER	Osteogenesis imperfecta\x2c recessive perinatal lethal(ClinVar)	Osteogenesis imperfecta, recessive perinatal lethal	C0268360	OI4	2198	P08123	NP_000080.2
Core matrisome	Collagens	COL1A2	collagen, type I, alpha 2	2198	p.GLY907ASP	Osteogenesis imperfecta\x2c recessive perinatal lethal(ClinVar)	Osteogenesis imperfecta, recessive perinatal lethal	C0268360	OI4	2198	P08123	NP_000080.2
Core matrisome	Collagens	COL1A2	collagen, type I, alpha 2	2198	p.GLY943ARG	Osteogenesis imperfecta(ClinVar)	Osteogenesis imperfecta	C0029434	OI4	2198	P08123	NP_000080.2
Core matrisome	Collagens	COL1A2	collagen, type I, alpha 2	2198	p.PRO383HIS	Osteogenesis imperfecta(ClinVar)	Osteogenesis imperfecta	C0029434	OI4	2198	P08123	NP_000080.2
Core matrisome	Collagens	COL2A1	collagen, type II, alpha 1	2200	p.ARG209TER	Stickler syndrome type 1(ClinVar)	Stickler syndrome	C0265253;C2020284	ANFH|AOM|COL11A3|MGC131516|SEDC	2200	P02458	NP_001835.3:NP_149162.2
Core matrisome	Collagens	COL2A1	collagen, type II, alpha 1	2200	p.ARG275CYS	Czech dysplasia metatarsal type(ClinVar)	Czech dysplasia	C1836683	ANFH|AOM|COL11A3|MGC131516|SEDC	2200	P02458	NP_001835.3:NP_149162.2
Core matrisome	Collagens	COL2A1	collagen, type II, alpha 1	2200	p.ARG653TER	Stickler syndrome type 1|Rhegmatogenous retinal detachment\x2c autosomal dominant(ClinVar)	Stickler syndrome	C0265253;C2020284	ANFH|AOM|COL11A3|MGC131516|SEDC	2200	P02458	NP_001835.3:NP_149162.2
Core matrisome	Collagens	COL2A1	collagen, type II, alpha 1	2200	p.ARG719CYS	Osteoarthritis with mild chondrodysplasia|Osteoarthritis with mild spondyloepiphyseal dysplasia(ClinVar)	Osteoarthritis	C0029408	ANFH|AOM|COL11A3|MGC131516|SEDC	2200	P02458	NP_001835.3:NP_149162.2
Core matrisome	Collagens	COL2A1	collagen, type II, alpha 1	2200	p.ARG904CYS	Epiphyseal dysplasia\x2c multiple\x2c with myopia and conductive deafness(ClinVar)	Epiphyseal dysplasia, multiple, with myopia and conductive deafness	C1851536	ANFH|AOM|COL11A3|MGC131516|SEDC	2200	P02458	NP_001835.3:NP_149162.2
Core matrisome	Collagens	COL2A1	collagen, type II, alpha 1	2200	p.ARG932TER	Stickler syndrome type 1(ClinVar)	Stickler syndrome	C0265253;C2020284	ANFH|AOM|COL11A3|MGC131516|SEDC	2200	P02458	NP_001835.3:NP_149162.2
Core matrisome	Collagens	COL2A1	collagen, type II, alpha 1	2200	p.ARG992GLY	Spondyloepimetaphyseal dysplasia Strudwick type(ClinVar)	Spondyloepimetaphyseal dysplasia Strudwick type	C0700635	ANFH|AOM|COL11A3|MGC131516|SEDC	2200	P02458	NP_001835.3:NP_149162.2
Core matrisome	Collagens	COL2A1	collagen, type II, alpha 1	2200	p.GLY1170SER	Avascular necrosis of the femoral head\x2c primary|Coxa plana(ClinVar)	AVASCULAR NECROSIS OF THE FEMORAL HEAD, PRIMARY	C0410480	ANFH|AOM|COL11A3|MGC131516|SEDC	2200	P02458	NP_001835.3:NP_149162.2
Core matrisome	Collagens	COL2A1	collagen, type II, alpha 1	2200	p.GLY267ASP	STICKLER SYNDROME\x2c TYPE I\x2c NONSYNDROMIC OCULAR(ClinVar)	Stickler syndrome	C0265253;C2020284	ANFH|AOM|COL11A3|MGC131516|SEDC	2200	P02458	NP_001835.3:NP_149162.2
Core matrisome	Collagens	COL2A1	collagen, type II, alpha 1	2200	p.GLY318ARG	Rhegmatogenous retinal detachment\x2c autosomal dominant(ClinVar)	Rhegmatogenous retinal detachment	C0271055	ANFH|AOM|COL11A3|MGC131516|SEDC	2200	P02458	NP_001835.3:NP_149162.2
Core matrisome	Collagens	COL2A1	collagen, type II, alpha 1	2200	p.GLY354ARG	Spondyloepimetaphyseal dysplasia Strudwick type(ClinVar)	Osteochondrodysplasia	C0026707;C0029422	ANFH|AOM|COL11A3|MGC131516|SEDC	2200	P02458	NP_001835.3:NP_149162.2
Core matrisome	Collagens	COL2A1	collagen, type II, alpha 1	2200	p.GLY477VAL	Achondrogenesis type 2(ClinVar)	Achondrogenesis type 2	C0220685	ANFH|AOM|COL11A3|MGC131516|SEDC	2200	P02458	NP_001835.3:NP_149162.2
Core matrisome	Collagens	COL2A1	collagen, type II, alpha 1	2200	p.GLY492VAL	Spondyloepimetaphyseal dysplasia Strudwick type(ClinVar)	Spondyloepimetaphyseal dysplasia Strudwick type	C0700635	ANFH|AOM|COL11A3|MGC131516|SEDC	2200	P02458	NP_001835.3:NP_149162.2
Core matrisome	Collagens	COL2A1	collagen, type II, alpha 1	2200	p.GLY504CYS	Spondyloepimetaphyseal dysplasia Strudwick type(ClinVar)	Spondyloepimetaphyseal dysplasia Strudwick type	C0700635	ANFH|AOM|COL11A3|MGC131516|SEDC	2200	P02458	NP_001835.3:NP_149162.2
Core matrisome	Collagens	COL2A1	collagen, type II, alpha 1	2200	p.GLY516ASP	Achondrogenesis type 2(ClinVar)	Achondrogenesis type 2	C0220685	ANFH|AOM|COL11A3|MGC131516|SEDC	2200	P02458	NP_001835.3:NP_149162.2
Core matrisome	Collagens	COL2A1	collagen, type II, alpha 1	2200	p.GLY717SER	Avascular necrosis of the femoral head\x2c primary(ClinVar)	AVASCULAR NECROSIS OF THE FEMORAL HEAD, PRIMARY	C0410480	ANFH|AOM|COL11A3|MGC131516|SEDC	2200	P02458	NP_001835.3:NP_149162.2
Core matrisome	Collagens	COL2A1	collagen, type II, alpha 1	2200	p.GLY909CYS	Spondyloepimetaphyseal dysplasia Strudwick type(ClinVar)	Spondyloepimetaphyseal dysplasia Strudwick type	C0700635	ANFH|AOM|COL11A3|MGC131516|SEDC	2200	P02458	NP_001835.3:NP_149162.2
Core matrisome	Collagens	COL2A1	collagen, type II, alpha 1	2200	p.LEU667PHE	STICKLER SYNDROME\x2c TYPE I\x2c NONSYNDROMIC OCULAR(ClinVar)	DRRD	C1836081	ANFH|AOM|COL11A3|MGC131516|SEDC	2200	P02458	NP_001835.3:NP_149162.2
Core matrisome	Collagens	COL2A1	collagen, type II, alpha 1	2200	p.THR1370MET	Spondyloepiphyseal dysplasia congenita(ClinVar)	Spondyloepiphyseal dysplasia congenita	C2745959	ANFH|AOM|COL11A3|MGC131516|SEDC	2200	P02458	NP_001835.3:NP_149162.2
Core matrisome	Collagens	COL2A1	collagen, type II, alpha 1	2200	p.TYR1391CYS	Platyspondylic lethal skeletal dysplasia Torrance type|Spondyloperipheral dysplasia(ClinVar)	Platyspondylic lethal skeletal dysplasia Torrance type	C1835437	ANFH|AOM|COL11A3|MGC131516|SEDC	2200	P02458	NP_001835.3:NP_149162.2
Core matrisome	Collagens	COL3A1	collagen, type III, alpha 1	2201	p.GLY1014GLU	Ehlers-Danlos syndrome\x2c type 4(ClinVar)	EDS4	C0268338	EDS4A|FLJ34534	2201	E7ENY8:H7C435:P02461	NP_000081.1
Core matrisome	Collagens	COL3A1	collagen, type III, alpha 1	2201	p.GLY1077VAL	Ehlers-Danlos syndrome\x2c type 4(ClinVar)	EDS4	C0268338	EDS4A|FLJ34534	2201	E7ENY8:H7C435:P02461	NP_000081.1
Core matrisome	Collagens	COL3A1	collagen, type III, alpha 1	2201	p.GLY1101GLU	Ehlers-Danlos syndrome\x2c type 4(ClinVar)	EDS4	C0268338	EDS4A|FLJ34534	2201	E7ENY8:H7C435:P02461	NP_000081.1
Core matrisome	Collagens	COL3A1	collagen, type III, alpha 1	2201	p.GLY1173GLU	Ehlers-Danlos syndrome\x2c type 4(ClinVar)	EDS4	C0268338	EDS4A|FLJ34534	2201	E7ENY8:H7C435:P02461	NP_000081.1
Core matrisome	Collagens	COL3A1	collagen, type III, alpha 1	2201	p.GLY1185ASP	Ehlers-Danlos syndrome\x2c type 4(ClinVar)	EDS4	C0268338	EDS4A|FLJ34534	2201	E7ENY8:H7C435:P02461	NP_000081.1
Core matrisome	Collagens	COL3A1	collagen, type III, alpha 1	2201	p.GLY1188GLU	Ehlers-Danlos syndrome\x2c type 4(ClinVar)	EDS4	C0268338	EDS4A|FLJ34534	2201	E7ENY8:H7C435:P02461	NP_000081.1
Core matrisome	Collagens	COL3A1	collagen, type III, alpha 1	2201	p.GLY183SER	Ehlers-Danlos syndrome\x2c type 4(ClinVar)	EDS4	C0268338	EDS4A|FLJ34534	2201	E7ENY8:H7C435:P02461	NP_000081.1
Core matrisome	Collagens	COL3A1	collagen, type III, alpha 1	2201	p.GLY249ASP	Ehlers-Danlos syndrome\x2c type 4(ClinVar)	EDS4	C0268338	EDS4A|FLJ34534	2201	E7ENY8:H7C435:P02461	NP_000081.1
Core matrisome	Collagens	COL3A1	collagen, type III, alpha 1	2201	p.GLY303ARG	Ehlers-Danlos syndrome\x2c type 4(ClinVar)	Aortic aneurysm	C0003486;C0340629;C2072946	EDS4A|FLJ34534	2201	E7ENY8:H7C435:P02461	NP_000081.1
Core matrisome	Collagens	COL3A1	collagen, type III, alpha 1	2201	p.GLY552GLU	Ehlers-Danlos syndrome\x2c type 4(ClinVar)	EDS4	C0268338	EDS4A|FLJ34534	2201	E7ENY8:H7C435:P02461	NP_000081.1
Core matrisome	Collagens	COL3A1	collagen, type III, alpha 1	2201	p.GLY582SER	Ehlers-Danlos syndrome\x2c type 4(ClinVar)	EDS4	C0268338	EDS4A|FLJ34534	2201	E7ENY8:H7C435:P02461	NP_000081.1
Core matrisome	Collagens	COL3A1	collagen, type III, alpha 1	2201	p.GLY666ASP	Ehlers-Danlos syndrome\x2c type 4(ClinVar)	EDS4	C0268338	EDS4A|FLJ34534	2201	E7ENY8:H7C435:P02461	NP_000081.1
Core matrisome	Collagens	COL3A1	collagen, type III, alpha 1	2201	p.GLY738SER	Ehlers-Danlos syndrome\x2c type 4(ClinVar)	EDS4	C0268338	EDS4A|FLJ34534	2201	E7ENY8:H7C435:P02461	NP_000081.1
Core matrisome	Collagens	COL3A1	collagen, type III, alpha 1	2201	p.GLY786ARG	Ehlers-Danlos syndrome\x2c type 4 variant(ClinVar)	Aortic aneurysm	C0003486;C0340629;C2072946	EDS4A|FLJ34534	2201	E7ENY8:H7C435:P02461	NP_000081.1
Core matrisome	Collagens	COL3A1	collagen, type III, alpha 1	2201	p.GLY804SER	Ehlers-Danlos syndrome\x2c type 3(ClinVar)	EDS3	C0268337	EDS4A|FLJ34534	2201	E7ENY8:H7C435:P02461	NP_000081.1
Core matrisome	Collagens	COL3A1	collagen, type III, alpha 1	2201	p.GLY957SER	Ehlers-Danlos syndrome\x2c type 4(ClinVar)	EDS4	C0268338	EDS4A|FLJ34534	2201	E7ENY8:H7C435:P02461	NP_000081.1
Core matrisome	Collagens	COL3A1	collagen, type III, alpha 1	2201	p.GLY960VAL	Ehlers-Danlos syndrome\x2c type 4(ClinVar)	EDS4	C0268338	EDS4A|FLJ34534	2201	E7ENY8:H7C435:P02461	NP_000081.1
Core matrisome	Collagens	COL4A1	collagen, type IV, alpha 1	2202	p.GLY498ARG	Angiopathy\x2c hereditary\x2c with nephropathy\x2c aneurysms\x2c and muscle cramps(ClinVar)	ANGIOPATHY, HEREDITARY, WITH NEPHROPATHY, ANEURYSMS, AND MUSCLE CRAMPS	C2673195	arresten	2202	F5H5K0:P02462	NP_001836.2
Core matrisome	Collagens	COL4A1	collagen, type IV, alpha 1	2202	p.GLY498VAL	Angiopathy\x2c hereditary\x2c with nephropathy\x2c aneurysms\x2c and muscle cramps(ClinVar)	ANGIOPATHY, HEREDITARY, WITH NEPHROPATHY, ANEURYSMS, AND MUSCLE CRAMPS	C2673195	arresten	2202	F5H5K0:P02462	NP_001836.2
Core matrisome	Collagens	COL4A1	collagen, type IV, alpha 1	2202	p.GLY510ARG	Angiopathy\x2c hereditary\x2c with nephropathy\x2c aneurysms\x2c and muscle cramps(ClinVar)	ANGIOPATHY, HEREDITARY, WITH NEPHROPATHY, ANEURYSMS, AND MUSCLE CRAMPS	C2673195	arresten	2202	F5H5K0:P02462	NP_001836.2
Core matrisome	Collagens	COL4A1	collagen, type IV, alpha 1	2202	p.GLY519ARG	Angiopathy\x2c hereditary\x2c with nephropathy\x2c aneurysms\x2c and muscle cramps(ClinVar)	ANGIOPATHY, HEREDITARY, WITH NEPHROPATHY, ANEURYSMS, AND MUSCLE CRAMPS	C2673195	arresten	2202	F5H5K0:P02462	NP_001836.2
Core matrisome	Collagens	COL4A1	collagen, type IV, alpha 1	2202	p.GLY528GLU	Angiopathy\x2c hereditary\x2c with nephropathy\x2c aneurysms\x2c and muscle cramps(ClinVar)	ANGIOPATHY, HEREDITARY, WITH NEPHROPATHY, ANEURYSMS, AND MUSCLE CRAMPS	C2673195	arresten	2202	F5H5K0:P02462	NP_001836.2
Core matrisome	Collagens	COL4A1	collagen, type IV, alpha 1	2202	p.GLY590GLU	Brain small vessel disease with hemorrhage(ClinVar)	Brain small vessel disease with hemorrhage	C1843512	arresten	2202	F5H5K0:P02462	NP_001836.2
Core matrisome	Collagens	COL4A1	collagen, type IV, alpha 1	2202	p.GLY720ASP	Brain small vessel disease with axenfeld-rieger anomaly|Brain small vessel disease with hemorrhage(ClinVar)	Axenfeld-Rieger anomaly	C0266548	arresten	2202	F5H5K0:P02462	NP_001836.2
Core matrisome	Collagens	COL4A1	collagen, type IV, alpha 1	2202	p.MET1LEU	Familial porencephaly(ClinVar)	Familial porencephaly	C1867983	arresten	2202	F5H5K0:P02462	NP_001836.2
Core matrisome	Collagens	COL4A3	collagen, type IV, alpha 3 (Goodpasture antigen)	2204	p.ARG1481TER	Alport syndrome\x2c autosomal recessive(ClinVar)	Alport syndrome	C1567741	-	2204	H7BXM4:Q01955	NP_000082.2
Core matrisome	Collagens	COL4A3	collagen, type IV, alpha 3 (Goodpasture antigen)	2204	p.GLY1167ARG	Alport syndrome\x2c autosomal dominant(ClinVar)	Alport syndrome	C1567741	-	2204	H7BXM4:Q01955	NP_000082.2
Core matrisome	Collagens	COL4A3	collagen, type IV, alpha 3 (Goodpasture antigen)	2204	p.SER1524TER	Alport syndrome\x2c autosomal recessive(ClinVar)	Alport syndrome	C1567741	-	2204	H7BXM4:Q01955	NP_000082.2
Core matrisome	Collagens	COL4A4	collagen, type IV, alpha 4	2206	p.ARG1377TER	Alport syndrome\x2c autosomal recessive(ClinVar)	Alport syndrome	C1567741	CA44	2206	J3KNM7:P53420	NP_000083.3:XP_005246338.1
Core matrisome	Collagens	COL4A4	collagen, type IV, alpha 4	2206	p.CYS1641TER	Alport syndrome\x2c autosomal recessive(ClinVar)	Alport syndrome	C1567741	CA44	2206	J3KNM7:P53420	NP_000083.3:XP_005246338.1
Core matrisome	Collagens	COL4A4	collagen, type IV, alpha 4	2206	p.GLY1201SER	Alport syndrome\x2c autosomal recessive(ClinVar)	Alport syndrome	C1567741	CA44	2206	J3KNM7:P53420	NP_000083.3:XP_005246338.1
Core matrisome	Collagens	COL4A4	collagen, type IV, alpha 4	2206	p.PRO1572LEU	Alport syndrome\x2c autosomal recessive(ClinVar)	Alport syndrome	C1567741	CA44	2206	J3KNM7:P53420	NP_000083.3:XP_005246338.1
Core matrisome	Collagens	COL4A4	collagen, type IV, alpha 4	2206	p.SER1238TER	Alport syndrome\x2c autosomal recessive(ClinVar)	Alport syndrome	C1567741	CA44	2206	J3KNM7:P53420	NP_000083.3:XP_005246338.1
Core matrisome	Collagens	COL4A5	collagen, type IV, alpha 5	2207	p.ALA1498ASP	Alport syndrome\x2c X-linked recessive(ClinVar)	Alport syndrome	C1567741	ASLN|ATS|CA54|MGC167109|MGC42377	2207	H0Y998:H0Y9H0:H0Y9R8:P29400	NP_000486.1:NP_203699.1:XP_006724679.1
Core matrisome	Collagens	COL4A5	collagen, type IV, alpha 5	2207	p.ARG1410CYS	Alport syndrome\x2c X-linked recessive(ClinVar)	Alport syndrome	C1567741	ASLN|ATS|CA54|MGC167109|MGC42377	2207	H0Y998:H0Y9H0:H0Y9R8:P29400	NP_000486.1:NP_203699.1:XP_006724679.1
Core matrisome	Collagens	COL4A5	collagen, type IV, alpha 5	2207	p.ARG1422CYS	Alport syndrome\x2c X-linked recessive(ClinVar)	Alport syndrome	C1567741	ASLN|ATS|CA54|MGC167109|MGC42377	2207	H0Y998:H0Y9H0:H0Y9R8:P29400	NP_000486.1:NP_203699.1:XP_006724679.1
Core matrisome	Collagens	COL4A5	collagen, type IV, alpha 5	2207	p.ARG1563TER	Alport syndrome\x2c X-linked recessive(ClinVar)	Alport syndrome	C1567741	ASLN|ATS|CA54|MGC167109|MGC42377	2207	H0Y998:H0Y9H0:H0Y9R8:P29400	NP_000486.1:NP_203699.1:XP_006724679.1
Core matrisome	Collagens	COL4A5	collagen, type IV, alpha 5	2207	p.ARG1677GLN	Alport syndrome\x2c X-linked recessive,Alport syndrome\x2c X-linked recessive,Alport syndrome\x2c X-linked recessive(ClinVar)	Alport syndrome	C1567741	ASLN|ATS|CA54|MGC167109|MGC42377	2207	H0Y998:H0Y9H0:H0Y9R8:P29400	NP_000486.1:NP_203699.1:XP_006724679.1
Core matrisome	Collagens	COL4A5	collagen, type IV, alpha 5	2207	p.ARG1677TER	Alport syndrome\x2c X-linked recessive(ClinVar)	Alport syndrome	C1567741	ASLN|ATS|CA54|MGC167109|MGC42377	2207	H0Y998:H0Y9H0:H0Y9R8:P29400	NP_000486.1:NP_203699.1:XP_006724679.1
Core matrisome	Collagens	COL4A5	collagen, type IV, alpha 5	2207	p.ARG266TER	Alport syndrome\x2c X-linked recessive(ClinVar)	Alport syndrome	C1567741	ASLN|ATS|CA54|MGC167109|MGC42377	2207	H0Y998:H0Y9H0:H0Y9R8:P29400	NP_000486.1:NP_203699.1:XP_006724679.1
Core matrisome	Collagens	COL4A5	collagen, type IV, alpha 5	2207	p.ARG373TER	Alport syndrome\x2c X-linked recessive(ClinVar)	Alport syndrome	C1567741	ASLN|ATS|CA54|MGC167109|MGC42377	2207	H0Y998:H0Y9H0:H0Y9R8:P29400	NP_000486.1:NP_203699.1:XP_006724679.1
Core matrisome	Collagens	COL4A5	collagen, type IV, alpha 5	2207	p.CYS1521TER	Alport syndrome\x2c X-linked recessive(ClinVar)	Alport syndrome	C1567741	ASLN|ATS|CA54|MGC167109|MGC42377	2207	H0Y998:H0Y9H0:H0Y9R8:P29400	NP_000486.1:NP_203699.1:XP_006724679.1
Core matrisome	Collagens	COL4A5	collagen, type IV, alpha 5	2207	p.CYS1567ARG	Alport syndrome\x2c X-linked recessive(ClinVar)	Alport syndrome	C1567741	ASLN|ATS|CA54|MGC167109|MGC42377	2207	H0Y998:H0Y9H0:H0Y9R8:P29400	NP_000486.1:NP_203699.1:XP_006724679.1
Core matrisome	Collagens	COL4A5	collagen, type IV, alpha 5	2207	p.CYS1586ARG	Alport syndrome\x2c X-linked recessive(ClinVar)	Alport syndrome	C1567741	ASLN|ATS|CA54|MGC167109|MGC42377	2207	H0Y998:H0Y9H0:H0Y9R8:P29400	NP_000486.1:NP_203699.1:XP_006724679.1
Core matrisome	Collagens	COL4A5	collagen, type IV, alpha 5	2207	p.CYS1586PHE	Alport syndrome\x2c X-linked recessive(ClinVar)	Alport syndrome	C1567741	ASLN|ATS|CA54|MGC167109|MGC42377	2207	H0Y998:H0Y9H0:H0Y9R8:P29400	NP_000486.1:NP_203699.1:XP_006724679.1
Core matrisome	Collagens	COL4A5	collagen, type IV, alpha 5	2207	p.CYS1638TYR	Alport syndrome\x2c X-linked recessive(ClinVar)	Alport syndrome	C1567741	ASLN|ATS|CA54|MGC167109|MGC42377	2207	H0Y998:H0Y9H0:H0Y9R8:P29400	NP_000486.1:NP_203699.1:XP_006724679.1
Core matrisome	Collagens	COL4A5	collagen, type IV, alpha 5	2207	p.CYS1678TRP	Alport syndrome\x2c X-linked recessive(ClinVar)	Alport syndrome	C1567741	ASLN|ATS|CA54|MGC167109|MGC42377	2207	H0Y998:H0Y9H0:H0Y9R8:P29400	NP_000486.1:NP_203699.1:XP_006724679.1
Core matrisome	Collagens	COL4A5	collagen, type IV, alpha 5	2207	p.CYS29TER	Alport syndrome\x2c X-linked recessive(ClinVar)	Alport syndrome	C1567741	ASLN|ATS|CA54|MGC167109|MGC42377	2207	H0Y998:H0Y9H0:H0Y9R8:P29400	NP_000486.1:NP_203699.1:XP_006724679.1
Core matrisome	Collagens	COL4A5	collagen, type IV, alpha 5	2207	p.GLN1016TER	Alport syndrome\x2c X-linked recessive(ClinVar)	Alport syndrome	C1567741	ASLN|ATS|CA54|MGC167109|MGC42377	2207	H0Y998:H0Y9H0:H0Y9R8:P29400	NP_000486.1:NP_203699.1:XP_006724679.1
Core matrisome	Collagens	COL4A5	collagen, type IV, alpha 5	2207	p.GLN1061TER	Alport syndrome\x2c X-linked recessive(ClinVar)	Alport syndrome	C1567741	ASLN|ATS|CA54|MGC167109|MGC42377	2207	H0Y998:H0Y9H0:H0Y9R8:P29400	NP_000486.1:NP_203699.1:XP_006724679.1
Core matrisome	Collagens	COL4A5	collagen, type IV, alpha 5	2207	p.GLN1180TER	Alport syndrome\x2c X-linked recessive(ClinVar)	Alport syndrome	C1567741	ASLN|ATS|CA54|MGC167109|MGC42377	2207	H0Y998:H0Y9H0:H0Y9R8:P29400	NP_000486.1:NP_203699.1:XP_006724679.1
Core matrisome	Collagens	COL4A5	collagen, type IV, alpha 5	2207	p.GLN1393TER	Alport syndrome\x2c X-linked recessive(ClinVar)	Alport syndrome	C1567741	ASLN|ATS|CA54|MGC167109|MGC42377	2207	H0Y998:H0Y9H0:H0Y9R8:P29400	NP_000486.1:NP_203699.1:XP_006724679.1
Core matrisome	Collagens	COL4A5	collagen, type IV, alpha 5	2207	p.GLN930TER	Alport syndrome\x2c X-linked recessive(ClinVar)	Alport syndrome	C1567741	ASLN|ATS|CA54|MGC167109|MGC42377	2207	H0Y998:H0Y9H0:H0Y9R8:P29400	NP_000486.1:NP_203699.1:XP_006724679.1
Core matrisome	Collagens	COL4A5	collagen, type IV, alpha 5	2207	p.GLU130TER	Alport syndrome\x2c X-linked recessive(ClinVar)	Alport syndrome	C1567741	ASLN|ATS|CA54|MGC167109|MGC42377	2207	H0Y998:H0Y9H0:H0Y9R8:P29400	NP_000486.1:NP_203699.1:XP_006724679.1
Core matrisome	Collagens	COL4A5	collagen, type IV, alpha 5	2207	p.GLU287TER	Alport syndrome\x2c X-linked recessive(ClinVar)	Alport syndrome	C1567741	ASLN|ATS|CA54|MGC167109|MGC42377	2207	H0Y998:H0Y9H0:H0Y9R8:P29400	NP_000486.1:NP_203699.1:XP_006724679.1
Core matrisome	Collagens	COL4A5	collagen, type IV, alpha 5	2207	p.GLU305TER	Alport syndrome\x2c X-linked recessive(ClinVar)	Alport syndrome	C1567741	ASLN|ATS|CA54|MGC167109|MGC42377	2207	H0Y998:H0Y9H0:H0Y9R8:P29400	NP_000486.1:NP_203699.1:XP_006724679.1
Core matrisome	Collagens	COL4A5	collagen, type IV, alpha 5	2207	p.GLU633LYS	Alport syndrome\x2c X-linked recessive(ClinVar)	Alport syndrome	C1567741	ASLN|ATS|CA54|MGC167109|MGC42377	2207	H0Y998:H0Y9H0:H0Y9R8:P29400	NP_000486.1:NP_203699.1:XP_006724679.1
Core matrisome	Collagens	COL4A5	collagen, type IV, alpha 5	2207	p.GLU700TER	Alport syndrome\x2c X-linked recessive(ClinVar)	Alport syndrome	C1567741	ASLN|ATS|CA54|MGC167109|MGC42377	2207	H0Y998:H0Y9H0:H0Y9R8:P29400	NP_000486.1:NP_203699.1:XP_006724679.1
Core matrisome	Collagens	COL4A5	collagen, type IV, alpha 5	2207	p.GLY1006VAL	Alport syndrome\x2c X-linked recessive(ClinVar)	Alport syndrome	C1567741	ASLN|ATS|CA54|MGC167109|MGC42377	2207	H0Y998:H0Y9H0:H0Y9R8:P29400	NP_000486.1:NP_203699.1:XP_006724679.1
Core matrisome	Collagens	COL4A5	collagen, type IV, alpha 5	2207	p.GLY1015VAL	Alport syndrome\x2c X-linked recessive(ClinVar)	Alport syndrome	C1567741	ASLN|ATS|CA54|MGC167109|MGC42377	2207	H0Y998:H0Y9H0:H0Y9R8:P29400	NP_000486.1:NP_203699.1:XP_006724679.1
Core matrisome	Collagens	COL4A5	collagen, type IV, alpha 5	2207	p.GLY1027VAL	Alport syndrome\x2c X-linked recessive(ClinVar)	Alport syndrome	C1567741	ASLN|ATS|CA54|MGC167109|MGC42377	2207	H0Y998:H0Y9H0:H0Y9R8:P29400	NP_000486.1:NP_203699.1:XP_006724679.1
Core matrisome	Collagens	COL4A5	collagen, type IV, alpha 5	2207	p.GLY1030SER	Alport syndrome\x2c X-linked recessive(ClinVar)	Alport syndrome	C1567741	ASLN|ATS|CA54|MGC167109|MGC42377	2207	H0Y998:H0Y9H0:H0Y9R8:P29400	NP_000486.1:NP_203699.1:XP_006724679.1
Core matrisome	Collagens	COL4A5	collagen, type IV, alpha 5	2207	p.GLY1036VAL	Alport syndrome\x2c X-linked recessive(ClinVar)	Alport syndrome	C1567741	ASLN|ATS|CA54|MGC167109|MGC42377	2207	H0Y998:H0Y9H0:H0Y9R8:P29400	NP_000486.1:NP_203699.1:XP_006724679.1
Core matrisome	Collagens	COL4A5	collagen, type IV, alpha 5	2207	p.GLY1039SER	Alport syndrome\x2c X-linked recessive(ClinVar)	Alport syndrome	C1567741	ASLN|ATS|CA54|MGC167109|MGC42377	2207	H0Y998:H0Y9H0:H0Y9R8:P29400	NP_000486.1:NP_203699.1:XP_006724679.1
Core matrisome	Collagens	COL4A5	collagen, type IV, alpha 5	2207	p.GLY1045GLU	Alport syndrome\x2c X-linked recessive(ClinVar)	Alport syndrome	C1567741	ASLN|ATS|CA54|MGC167109|MGC42377	2207	H0Y998:H0Y9H0:H0Y9R8:P29400	NP_000486.1:NP_203699.1:XP_006724679.1
Core matrisome	Collagens	COL4A5	collagen, type IV, alpha 5	2207	p.GLY1057TER	Alport syndrome\x2c X-linked recessive(ClinVar)	Alport syndrome	C1567741	ASLN|ATS|CA54|MGC167109|MGC42377	2207	H0Y998:H0Y9H0:H0Y9R8:P29400	NP_000486.1:NP_203699.1:XP_006724679.1
Core matrisome	Collagens	COL4A5	collagen, type IV, alpha 5	2207	p.GLY1060TER	Alport syndrome\x2c X-linked recessive(ClinVar)	Alport syndrome	C1567741	ASLN|ATS|CA54|MGC167109|MGC42377	2207	H0Y998:H0Y9H0:H0Y9R8:P29400	NP_000486.1:NP_203699.1:XP_006724679.1
Core matrisome	Collagens	COL4A5	collagen, type IV, alpha 5	2207	p.GLY1063VAL	Alport syndrome\x2c X-linked recessive(ClinVar)	Alport syndrome	C1567741	ASLN|ATS|CA54|MGC167109|MGC42377	2207	H0Y998:H0Y9H0:H0Y9R8:P29400	NP_000486.1:NP_203699.1:XP_006724679.1
Core matrisome	Collagens	COL4A5	collagen, type IV, alpha 5	2207	p.GLY1066ALA	Alport syndrome\x2c X-linked recessive(ClinVar)	Alport syndrome	C1567741	ASLN|ATS|CA54|MGC167109|MGC42377	2207	H0Y998:H0Y9H0:H0Y9R8:P29400	NP_000486.1:NP_203699.1:XP_006724679.1
Core matrisome	Collagens	COL4A5	collagen, type IV, alpha 5	2207	p.GLY1066SER	Alport syndrome\x2c X-linked recessive,Alport syndrome\x2c X-linked recessive(ClinVar)	Alport syndrome	C1567741	ASLN|ATS|CA54|MGC167109|MGC42377	2207	H0Y998:H0Y9H0:H0Y9R8:P29400	NP_000486.1:NP_203699.1:XP_006724679.1
Core matrisome	Collagens	COL4A5	collagen, type IV, alpha 5	2207	p.GLY1083SER	Alport syndrome\x2c X-linked recessive(ClinVar)	Alport syndrome	C1567741	ASLN|ATS|CA54|MGC167109|MGC42377	2207	H0Y998:H0Y9H0:H0Y9R8:P29400	NP_000486.1:NP_203699.1:XP_006724679.1
Core matrisome	Collagens	COL4A5	collagen, type IV, alpha 5	2207	p.GLY1086ARG	Alport syndrome\x2c X-linked recessive(ClinVar)	Alport syndrome	C1567741	ASLN|ATS|CA54|MGC167109|MGC42377	2207	H0Y998:H0Y9H0:H0Y9R8:P29400	NP_000486.1:NP_203699.1:XP_006724679.1
Core matrisome	Collagens	COL4A5	collagen, type IV, alpha 5	2207	p.GLY1086ASP	Alport syndrome\x2c X-linked recessive(ClinVar)	Alport syndrome	C1567741	ASLN|ATS|CA54|MGC167109|MGC42377	2207	H0Y998:H0Y9H0:H0Y9R8:P29400	NP_000486.1:NP_203699.1:XP_006724679.1
Core matrisome	Collagens	COL4A5	collagen, type IV, alpha 5	2207	p.GLY1104VAL	Alport syndrome\x2c X-linked recessive(ClinVar)	Alport syndrome	C1567741	ASLN|ATS|CA54|MGC167109|MGC42377	2207	H0Y998:H0Y9H0:H0Y9R8:P29400	NP_000486.1:NP_203699.1:XP_006724679.1
Core matrisome	Collagens	COL4A5	collagen, type IV, alpha 5	2207	p.GLY1107ARG	Alport syndrome\x2c X-linked recessive(ClinVar)	Alport syndrome	C1567741	ASLN|ATS|CA54|MGC167109|MGC42377	2207	H0Y998:H0Y9H0:H0Y9R8:P29400	NP_000486.1:NP_203699.1:XP_006724679.1
Core matrisome	Collagens	COL4A5	collagen, type IV, alpha 5	2207	p.GLY1143ASP	Alport syndrome\x2c X-linked recessive(ClinVar)	Alport syndrome	C1567741	ASLN|ATS|CA54|MGC167109|MGC42377	2207	H0Y998:H0Y9H0:H0Y9R8:P29400	NP_000486.1:NP_203699.1:XP_006724679.1
Core matrisome	Collagens	COL4A5	collagen, type IV, alpha 5	2207	p.GLY1143SER	Alport syndrome\x2c X-linked recessive(ClinVar)	Alport syndrome	C1567741	ASLN|ATS|CA54|MGC167109|MGC42377	2207	H0Y998:H0Y9H0:H0Y9R8:P29400	NP_000486.1:NP_203699.1:XP_006724679.1
Core matrisome	Collagens	COL4A5	collagen, type IV, alpha 5	2207	p.GLY1161ARG	Alport syndrome\x2c X-linked recessive(ClinVar)	Alport syndrome	C1567741	ASLN|ATS|CA54|MGC167109|MGC42377	2207	H0Y998:H0Y9H0:H0Y9R8:P29400	NP_000486.1:NP_203699.1:XP_006724679.1
Core matrisome	Collagens	COL4A5	collagen, type IV, alpha 5	2207	p.GLY1167SER	Alport syndrome\x2c X-linked recessive(ClinVar)	Alport syndrome	C1567741	ASLN|ATS|CA54|MGC167109|MGC42377	2207	H0Y998:H0Y9H0:H0Y9R8:P29400	NP_000486.1:NP_203699.1:XP_006724679.1
Core matrisome	Collagens	COL4A5	collagen, type IV, alpha 5	2207	p.GLY1170SER	Alport syndrome\x2c X-linked recessive(ClinVar)	Alport syndrome	C1567741	ASLN|ATS|CA54|MGC167109|MGC42377	2207	H0Y998:H0Y9H0:H0Y9R8:P29400	NP_000486.1:NP_203699.1:XP_006724679.1
Core matrisome	Collagens	COL4A5	collagen, type IV, alpha 5	2207	p.GLY1179ARG	Alport syndrome\x2c X-linked recessive(ClinVar)	Alport syndrome	C1567741	ASLN|ATS|CA54|MGC167109|MGC42377	2207	H0Y998:H0Y9H0:H0Y9R8:P29400	NP_000486.1:NP_203699.1:XP_006724679.1
Core matrisome	Collagens	COL4A5	collagen, type IV, alpha 5	2207	p.GLY1182ARG	Alport syndrome\x2c X-linked recessive(ClinVar)	Alport syndrome	C1567741	ASLN|ATS|CA54|MGC167109|MGC42377	2207	H0Y998:H0Y9H0:H0Y9R8:P29400	NP_000486.1:NP_203699.1:XP_006724679.1
Core matrisome	Collagens	COL4A5	collagen, type IV, alpha 5	2207	p.GLY1196ARG	Alport syndrome\x2c X-linked recessive(ClinVar)	Alport syndrome	C1567741	ASLN|ATS|CA54|MGC167109|MGC42377	2207	H0Y998:H0Y9H0:H0Y9R8:P29400	NP_000486.1:NP_203699.1:XP_006724679.1
Core matrisome	Collagens	COL4A5	collagen, type IV, alpha 5	2207	p.GLY1205SER	Alport syndrome\x2c X-linked recessive,Alport syndrome\x2c X-linked recessive(ClinVar)	Alport syndrome	C1567741	ASLN|ATS|CA54|MGC167109|MGC42377	2207	H0Y998:H0Y9H0:H0Y9R8:P29400	NP_000486.1:NP_203699.1:XP_006724679.1
Core matrisome	Collagens	COL4A5	collagen, type IV, alpha 5	2207	p.GLY1211ARG	Alport syndrome\x2c X-linked recessive(ClinVar)	Alport syndrome	C1567741	ASLN|ATS|CA54|MGC167109|MGC42377	2207	H0Y998:H0Y9H0:H0Y9R8:P29400	NP_000486.1:NP_203699.1:XP_006724679.1
Core matrisome	Collagens	COL4A5	collagen, type IV, alpha 5	2207	p.GLY1211GLU	Alport syndrome\x2c X-linked recessive(ClinVar)	Alport syndrome	C1567741	ASLN|ATS|CA54|MGC167109|MGC42377	2207	H0Y998:H0Y9H0:H0Y9R8:P29400	NP_000486.1:NP_203699.1:XP_006724679.1
Core matrisome	Collagens	COL4A5	collagen, type IV, alpha 5	2207	p.GLY1214GLU	Alport syndrome\x2c X-linked recessive(ClinVar)	Alport syndrome	C1567741	ASLN|ATS|CA54|MGC167109|MGC42377	2207	H0Y998:H0Y9H0:H0Y9R8:P29400	NP_000486.1:NP_203699.1:XP_006724679.1
Core matrisome	Collagens	COL4A5	collagen, type IV, alpha 5	2207	p.GLY1220ASP	Alport syndrome\x2c X-linked recessive(ClinVar)	Alport syndrome	C1567741	ASLN|ATS|CA54|MGC167109|MGC42377	2207	H0Y998:H0Y9H0:H0Y9R8:P29400	NP_000486.1:NP_203699.1:XP_006724679.1
Core matrisome	Collagens	COL4A5	collagen, type IV, alpha 5	2207	p.GLY1223VAL	Alport syndrome\x2c X-linked recessive(ClinVar)	Alport syndrome	C1567741	ASLN|ATS|CA54|MGC167109|MGC42377	2207	H0Y998:H0Y9H0:H0Y9R8:P29400	NP_000486.1:NP_203699.1:XP_006724679.1
Core matrisome	Collagens	COL4A5	collagen, type IV, alpha 5	2207	p.GLY1229ASP	Alport syndrome\x2c X-linked recessive(ClinVar)	Alport syndrome	C1567741	ASLN|ATS|CA54|MGC167109|MGC42377	2207	H0Y998:H0Y9H0:H0Y9R8:P29400	NP_000486.1:NP_203699.1:XP_006724679.1
Core matrisome	Collagens	COL4A5	collagen, type IV, alpha 5	2207	p.GLY1232SER	Alport syndrome\x2c X-linked recessive(ClinVar)	Alport syndrome	C1567741	ASLN|ATS|CA54|MGC167109|MGC42377	2207	H0Y998:H0Y9H0:H0Y9R8:P29400	NP_000486.1:NP_203699.1:XP_006724679.1
Core matrisome	Collagens	COL4A5	collagen, type IV, alpha 5	2207	p.GLY1241CYS	Alport syndrome\x2c X-linked recessive(ClinVar)	Alport syndrome	C1567741	ASLN|ATS|CA54|MGC167109|MGC42377	2207	H0Y998:H0Y9H0:H0Y9R8:P29400	NP_000486.1:NP_203699.1:XP_006724679.1
Core matrisome	Collagens	COL4A5	collagen, type IV, alpha 5	2207	p.GLY1244ASP	Alport syndrome\x2c X-linked recessive(ClinVar)	Alport syndrome	C1567741	ASLN|ATS|CA54|MGC167109|MGC42377	2207	H0Y998:H0Y9H0:H0Y9R8:P29400	NP_000486.1:NP_203699.1:XP_006724679.1
Core matrisome	Collagens	COL4A5	collagen, type IV, alpha 5	2207	p.GLY1252SER	Alport syndrome\x2c X-linked recessive(ClinVar)	Alport syndrome	C1567741	ASLN|ATS|CA54|MGC167109|MGC42377	2207	H0Y998:H0Y9H0:H0Y9R8:P29400	NP_000486.1:NP_203699.1:XP_006724679.1
Core matrisome	Collagens	COL4A5	collagen, type IV, alpha 5	2207	p.GLY1255ARG	Alport syndrome\x2c X-linked recessive(ClinVar)	Alport syndrome	C1567741	ASLN|ATS|CA54|MGC167109|MGC42377	2207	H0Y998:H0Y9H0:H0Y9R8:P29400	NP_000486.1:NP_203699.1:XP_006724679.1
Core matrisome	Collagens	COL4A5	collagen, type IV, alpha 5	2207	p.GLY1261GLU	Alport syndrome\x2c X-linked recessive(ClinVar)	Alport syndrome	C1567741	ASLN|ATS|CA54|MGC167109|MGC42377	2207	H0Y998:H0Y9H0:H0Y9R8:P29400	NP_000486.1:NP_203699.1:XP_006724679.1
Core matrisome	Collagens	COL4A5	collagen, type IV, alpha 5	2207	p.GLY1270SER	Alport syndrome\x2c X-linked recessive(ClinVar)	Alport syndrome	C1567741	ASLN|ATS|CA54|MGC167109|MGC42377	2207	H0Y998:H0Y9H0:H0Y9R8:P29400	NP_000486.1:NP_203699.1:XP_006724679.1
Core matrisome	Collagens	COL4A5	collagen, type IV, alpha 5	2207	p.GLY1333SER	Alport syndrome\x2c X-linked recessive(ClinVar)	Alport syndrome	C1567741	ASLN|ATS|CA54|MGC167109|MGC42377	2207	H0Y998:H0Y9H0:H0Y9R8:P29400	NP_000486.1:NP_203699.1:XP_006724679.1
Core matrisome	Collagens	COL4A5	collagen, type IV, alpha 5	2207	p.GLY1357SER	Alport syndrome\x2c X-linked recessive,.(ClinVar)	Alport syndrome	C1567741	ASLN|ATS|CA54|MGC167109|MGC42377	2207	H0Y998:H0Y9H0:H0Y9R8:P29400	NP_000486.1:NP_203699.1:XP_006724679.1
Core matrisome	Collagens	COL4A5	collagen, type IV, alpha 5	2207	p.GLY1421TRP	Alport syndrome\x2c X-linked recessive(ClinVar)	Alport syndrome	C1567741	ASLN|ATS|CA54|MGC167109|MGC42377	2207	H0Y998:H0Y9H0:H0Y9R8:P29400	NP_000486.1:NP_203699.1:XP_006724679.1
Core matrisome	Collagens	COL4A5	collagen, type IV, alpha 5	2207	p.GLY1442ARG	Alport syndrome\x2c X-linked recessive(ClinVar)	Alport syndrome	C1567741	ASLN|ATS|CA54|MGC167109|MGC42377	2207	H0Y998:H0Y9H0:H0Y9R8:P29400	NP_000486.1:NP_203699.1:XP_006724679.1
Core matrisome	Collagens	COL4A5	collagen, type IV, alpha 5	2207	p.GLY1442ASP	Alport syndrome\x2c X-linked recessive,Alport syndrome\x2c X-linked recessive(ClinVar)	Alport syndrome	C1567741	ASLN|ATS|CA54|MGC167109|MGC42377	2207	H0Y998:H0Y9H0:H0Y9R8:P29400	NP_000486.1:NP_203699.1:XP_006724679.1
Core matrisome	Collagens	COL4A5	collagen, type IV, alpha 5	2207	p.GLY1448SER	Alport syndrome\x2c X-linked recessive(ClinVar)	Alport syndrome	C1567741	ASLN|ATS|CA54|MGC167109|MGC42377	2207	H0Y998:H0Y9H0:H0Y9R8:P29400	NP_000486.1:NP_203699.1:XP_006724679.1
Core matrisome	Collagens	COL4A5	collagen, type IV, alpha 5	2207	p.GLY144SER	Alport syndrome\x2c X-linked recessive,Alport syndrome\x2c X-linked recessive(ClinVar)	Alport syndrome	C1567741	ASLN|ATS|CA54|MGC167109|MGC42377	2207	H0Y998:H0Y9H0:H0Y9R8:P29400	NP_000486.1:NP_203699.1:XP_006724679.1
Core matrisome	Collagens	COL4A5	collagen, type IV, alpha 5	2207	p.GLY1451SER	Alport syndrome\x2c X-linked recessive(ClinVar)	Alport syndrome	C1567741	ASLN|ATS|CA54|MGC167109|MGC42377	2207	H0Y998:H0Y9H0:H0Y9R8:P29400	NP_000486.1:NP_203699.1:XP_006724679.1
Core matrisome	Collagens	COL4A5	collagen, type IV, alpha 5	2207	p.GLY1486ALA	Alport syndrome\x2c X-linked recessive(ClinVar)	Alport syndrome	C1567741	ASLN|ATS|CA54|MGC167109|MGC42377	2207	H0Y998:H0Y9H0:H0Y9R8:P29400	NP_000486.1:NP_203699.1:XP_006724679.1
Core matrisome	Collagens	COL4A5	collagen, type IV, alpha 5	2207	p.GLY1596ASP	Alport syndrome\x2c X-linked recessive(ClinVar)	Alport syndrome	C1567741	ASLN|ATS|CA54|MGC167109|MGC42377	2207	H0Y998:H0Y9H0:H0Y9R8:P29400	NP_000486.1:NP_203699.1:XP_006724679.1
Core matrisome	Collagens	COL4A5	collagen, type IV, alpha 5	2207	p.GLY174ARG	Alport syndrome\x2c X-linked recessive(ClinVar)	Alport syndrome	C1567741	ASLN|ATS|CA54|MGC167109|MGC42377	2207	H0Y998:H0Y9H0:H0Y9R8:P29400	NP_000486.1:NP_203699.1:XP_006724679.1
Core matrisome	Collagens	COL4A5	collagen, type IV, alpha 5	2207	p.GLY177ARG	Alport syndrome\x2c X-linked recessive,Alport syndrome\x2c X-linked recessive(ClinVar)	Alport syndrome	C1567741	ASLN|ATS|CA54|MGC167109|MGC42377	2207	H0Y998:H0Y9H0:H0Y9R8:P29400	NP_000486.1:NP_203699.1:XP_006724679.1
Core matrisome	Collagens	COL4A5	collagen, type IV, alpha 5	2207	p.GLY183VAL	Alport syndrome\x2c X-linked recessive(ClinVar)	Alport syndrome	C1567741	ASLN|ATS|CA54|MGC167109|MGC42377	2207	H0Y998:H0Y9H0:H0Y9R8:P29400	NP_000486.1:NP_203699.1:XP_006724679.1
Core matrisome	Collagens	COL4A5	collagen, type IV, alpha 5	2207	p.GLY192ARG	Alport syndrome\x2c X-linked recessive(ClinVar)	Alport syndrome	C1567741	ASLN|ATS|CA54|MGC167109|MGC42377	2207	H0Y998:H0Y9H0:H0Y9R8:P29400	NP_000486.1:NP_203699.1:XP_006724679.1
Core matrisome	Collagens	COL4A5	collagen, type IV, alpha 5	2207	p.GLY195ASP	Alport syndrome\x2c X-linked recessive(ClinVar)	Alport syndrome	C1567741	ASLN|ATS|CA54|MGC167109|MGC42377	2207	H0Y998:H0Y9H0:H0Y9R8:P29400	NP_000486.1:NP_203699.1:XP_006724679.1
Core matrisome	Collagens	COL4A5	collagen, type IV, alpha 5	2207	p.GLY198GLU	Alport syndrome\x2c X-linked recessive(ClinVar)	Alport syndrome	C1567741	ASLN|ATS|CA54|MGC167109|MGC42377	2207	H0Y998:H0Y9H0:H0Y9R8:P29400	NP_000486.1:NP_203699.1:XP_006724679.1
Core matrisome	Collagens	COL4A5	collagen, type IV, alpha 5	2207	p.GLY201VAL	Alport syndrome\x2c X-linked recessive(ClinVar)	Alport syndrome	C1567741	ASLN|ATS|CA54|MGC167109|MGC42377	2207	H0Y998:H0Y9H0:H0Y9R8:P29400	NP_000486.1:NP_203699.1:XP_006724679.1
Core matrisome	Collagens	COL4A5	collagen, type IV, alpha 5	2207	p.GLY213GLU	Alport syndrome\x2c X-linked recessive(ClinVar)	Alport syndrome	C1567741	ASLN|ATS|CA54|MGC167109|MGC42377	2207	H0Y998:H0Y9H0:H0Y9R8:P29400	NP_000486.1:NP_203699.1:XP_006724679.1
Core matrisome	Collagens	COL4A5	collagen, type IV, alpha 5	2207	p.GLY216ARG	Alport syndrome\x2c X-linked recessive(ClinVar)	Alport syndrome	C1567741	ASLN|ATS|CA54|MGC167109|MGC42377	2207	H0Y998:H0Y9H0:H0Y9R8:P29400	NP_000486.1:NP_203699.1:XP_006724679.1
Core matrisome	Collagens	COL4A5	collagen, type IV, alpha 5	2207	p.GLY216VAL	Alport syndrome\x2c X-linked recessive(ClinVar)	Alport syndrome	C1567741	ASLN|ATS|CA54|MGC167109|MGC42377	2207	H0Y998:H0Y9H0:H0Y9R8:P29400	NP_000486.1:NP_203699.1:XP_006724679.1
Core matrisome	Collagens	COL4A5	collagen, type IV, alpha 5	2207	p.GLY219SER	Alport syndrome\x2c X-linked recessive(ClinVar)	Alport syndrome	C1567741	ASLN|ATS|CA54|MGC167109|MGC42377	2207	H0Y998:H0Y9H0:H0Y9R8:P29400	NP_000486.1:NP_203699.1:XP_006724679.1
Core matrisome	Collagens	COL4A5	collagen, type IV, alpha 5	2207	p.GLY230ARG	Alport syndrome\x2c X-linked recessive(ClinVar)	Alport syndrome	C1567741	ASLN|ATS|CA54|MGC167109|MGC42377	2207	H0Y998:H0Y9H0:H0Y9R8:P29400	NP_000486.1:NP_203699.1:XP_006724679.1
Core matrisome	Collagens	COL4A5	collagen, type IV, alpha 5	2207	p.GLY239GLU	Alport syndrome\x2c X-linked recessive(ClinVar)	Alport syndrome	C1567741	ASLN|ATS|CA54|MGC167109|MGC42377	2207	H0Y998:H0Y9H0:H0Y9R8:P29400	NP_000486.1:NP_203699.1:XP_006724679.1
Core matrisome	Collagens	COL4A5	collagen, type IV, alpha 5	2207	p.GLY264ARG	Alport syndrome\x2c X-linked recessive(ClinVar)	Alport syndrome	C1567741	ASLN|ATS|CA54|MGC167109|MGC42377	2207	H0Y998:H0Y9H0:H0Y9R8:P29400	NP_000486.1:NP_203699.1:XP_006724679.1
Core matrisome	Collagens	COL4A5	collagen, type IV, alpha 5	2207	p.GLY264ASP	Alport syndrome\x2c X-linked recessive(ClinVar)	Alport syndrome	C1567741	ASLN|ATS|CA54|MGC167109|MGC42377	2207	H0Y998:H0Y9H0:H0Y9R8:P29400	NP_000486.1:NP_203699.1:XP_006724679.1
Core matrisome	Collagens	COL4A5	collagen, type IV, alpha 5	2207	p.GLY289VAL	Alport syndrome\x2c X-linked recessive|Alport syndrome\x2c X-linked recessive(ClinVar)	Alport syndrome	C1567741	ASLN|ATS|CA54|MGC167109|MGC42377	2207	H0Y998:H0Y9H0:H0Y9R8:P29400	NP_000486.1:NP_203699.1:XP_006724679.1
Core matrisome	Collagens	COL4A5	collagen, type IV, alpha 5	2207	p.GLY292ARG	Alport syndrome\x2c X-linked recessive(ClinVar)	Alport syndrome	C1567741	ASLN|ATS|CA54|MGC167109|MGC42377	2207	H0Y998:H0Y9H0:H0Y9R8:P29400	NP_000486.1:NP_203699.1:XP_006724679.1
Core matrisome	Collagens	COL4A5	collagen, type IV, alpha 5	2207	p.GLY292VAL	Alport syndrome\x2c X-linked recessive(ClinVar)	Alport syndrome	C1567741	ASLN|ATS|CA54|MGC167109|MGC42377	2207	H0Y998:H0Y9H0:H0Y9R8:P29400	NP_000486.1:NP_203699.1:XP_006724679.1
Core matrisome	Collagens	COL4A5	collagen, type IV, alpha 5	2207	p.GLY295ASP	Alport syndrome\x2c X-linked recessive(ClinVar)	Alport syndrome	C1567741	ASLN|ATS|CA54|MGC167109|MGC42377	2207	H0Y998:H0Y9H0:H0Y9R8:P29400	NP_000486.1:NP_203699.1:XP_006724679.1
Core matrisome	Collagens	COL4A5	collagen, type IV, alpha 5	2207	p.GLY298SER	Alport syndrome\x2c X-linked recessive(ClinVar)	Alport syndrome	C1567741	ASLN|ATS|CA54|MGC167109|MGC42377	2207	H0Y998:H0Y9H0:H0Y9R8:P29400	NP_000486.1:NP_203699.1:XP_006724679.1
Core matrisome	Collagens	COL4A5	collagen, type IV, alpha 5	2207	p.GLY310ARG	Alport syndrome\x2c X-linked recessive(ClinVar)	Alport syndrome	C1567741	ASLN|ATS|CA54|MGC167109|MGC42377	2207	H0Y998:H0Y9H0:H0Y9R8:P29400	NP_000486.1:NP_203699.1:XP_006724679.1
Core matrisome	Collagens	COL4A5	collagen, type IV, alpha 5	2207	p.GLY313SER	Alport syndrome\x2c X-linked recessive(ClinVar)	Alport syndrome	C1567741	ASLN|ATS|CA54|MGC167109|MGC42377	2207	H0Y998:H0Y9H0:H0Y9R8:P29400	NP_000486.1:NP_203699.1:XP_006724679.1
Core matrisome	Collagens	COL4A5	collagen, type IV, alpha 5	2207	p.GLY319ARG	Alport syndrome\x2c X-linked recessive(ClinVar)	Alport syndrome	C1567741	ASLN|ATS|CA54|MGC167109|MGC42377	2207	H0Y998:H0Y9H0:H0Y9R8:P29400	NP_000486.1:NP_203699.1:XP_006724679.1
Core matrisome	Collagens	COL4A5	collagen, type IV, alpha 5	2207	p.GLY319ASP	Alport syndrome\x2c X-linked recessive(ClinVar)	Alport syndrome	C1567741	ASLN|ATS|CA54|MGC167109|MGC42377	2207	H0Y998:H0Y9H0:H0Y9R8:P29400	NP_000486.1:NP_203699.1:XP_006724679.1
Core matrisome	Collagens	COL4A5	collagen, type IV, alpha 5	2207	p.GLY325ARG	Alport syndrome\x2c X-linked recessive,Alport syndrome\x2c X-linked recessive(ClinVar)	Alport syndrome	C1567741	ASLN|ATS|CA54|MGC167109|MGC42377	2207	H0Y998:H0Y9H0:H0Y9R8:P29400	NP_000486.1:NP_203699.1:XP_006724679.1
Core matrisome	Collagens	COL4A5	collagen, type IV, alpha 5	2207	p.GLY325GLU	Alport syndrome\x2c X-linked recessive(ClinVar)	Alport syndrome	C1567741	ASLN|ATS|CA54|MGC167109|MGC42377	2207	H0Y998:H0Y9H0:H0Y9R8:P29400	NP_000486.1:NP_203699.1:XP_006724679.1
Core matrisome	Collagens	COL4A5	collagen, type IV, alpha 5	2207	p.GLY331VAL	Alport syndrome\x2c X-linked recessive(ClinVar)	Alport syndrome	C1567741	ASLN|ATS|CA54|MGC167109|MGC42377	2207	H0Y998:H0Y9H0:H0Y9R8:P29400	NP_000486.1:NP_203699.1:XP_006724679.1
Core matrisome	Collagens	COL4A5	collagen, type IV, alpha 5	2207	p.GLY334VAL	Alport syndrome\x2c X-linked recessive(ClinVar)	Alport syndrome	C1567741	ASLN|ATS|CA54|MGC167109|MGC42377	2207	H0Y998:H0Y9H0:H0Y9R8:P29400	NP_000486.1:NP_203699.1:XP_006724679.1
Core matrisome	Collagens	COL4A5	collagen, type IV, alpha 5	2207	p.GLY365GLU	Alport syndrome\x2c X-linked recessive(ClinVar)	Alport syndrome	C1567741	ASLN|ATS|CA54|MGC167109|MGC42377	2207	H0Y998:H0Y9H0:H0Y9R8:P29400	NP_000486.1:NP_203699.1:XP_006724679.1
Core matrisome	Collagens	COL4A5	collagen, type IV, alpha 5	2207	p.GLY371GLU	Alport syndrome\x2c X-linked recessive(ClinVar)	Alport syndrome	C1567741	ASLN|ATS|CA54|MGC167109|MGC42377	2207	H0Y998:H0Y9H0:H0Y9R8:P29400	NP_000486.1:NP_203699.1:XP_006724679.1
Core matrisome	Collagens	COL4A5	collagen, type IV, alpha 5	2207	p.GLY374ALA	Alport syndrome\x2c X-linked recessive(ClinVar)	Alport syndrome	C1567741	ASLN|ATS|CA54|MGC167109|MGC42377	2207	H0Y998:H0Y9H0:H0Y9R8:P29400	NP_000486.1:NP_203699.1:XP_006724679.1
Core matrisome	Collagens	COL4A5	collagen, type IV, alpha 5	2207	p.GLY380ASP	Alport syndrome\x2c X-linked recessive(ClinVar)	Alport syndrome	C1567741	ASLN|ATS|CA54|MGC167109|MGC42377	2207	H0Y998:H0Y9H0:H0Y9R8:P29400	NP_000486.1:NP_203699.1:XP_006724679.1
Core matrisome	Collagens	COL4A5	collagen, type IV, alpha 5	2207	p.GLY383ASP	Alport syndrome\x2c X-linked recessive(ClinVar)	Alport syndrome	C1567741	ASLN|ATS|CA54|MGC167109|MGC42377	2207	H0Y998:H0Y9H0:H0Y9R8:P29400	NP_000486.1:NP_203699.1:XP_006724679.1
Core matrisome	Collagens	COL4A5	collagen, type IV, alpha 5	2207	p.GLY400GLU	Alport syndrome\x2c X-linked recessive(ClinVar)	Alport syndrome	C1567741	ASLN|ATS|CA54|MGC167109|MGC42377	2207	H0Y998:H0Y9H0:H0Y9R8:P29400	NP_000486.1:NP_203699.1:XP_006724679.1
Core matrisome	Collagens	COL4A5	collagen, type IV, alpha 5	2207	p.GLY403VAL	Alport syndrome\x2c X-linked recessive(ClinVar)	Alport syndrome	C1567741	ASLN|ATS|CA54|MGC167109|MGC42377	2207	H0Y998:H0Y9H0:H0Y9R8:P29400	NP_000486.1:NP_203699.1:XP_006724679.1
Core matrisome	Collagens	COL4A5	collagen, type IV, alpha 5	2207	p.GLY406VAL	Alport syndrome\x2c X-linked recessive(ClinVar)	Alport syndrome	C1567741	ASLN|ATS|CA54|MGC167109|MGC42377	2207	H0Y998:H0Y9H0:H0Y9R8:P29400	NP_000486.1:NP_203699.1:XP_006724679.1
Core matrisome	Collagens	COL4A5	collagen, type IV, alpha 5	2207	p.GLY409ASP	Alport syndrome\x2c X-linked recessive(ClinVar)	Alport syndrome	C1567741	ASLN|ATS|CA54|MGC167109|MGC42377	2207	H0Y998:H0Y9H0:H0Y9R8:P29400	NP_000486.1:NP_203699.1:XP_006724679.1
Core matrisome	Collagens	COL4A5	collagen, type IV, alpha 5	2207	p.GLY412VAL	Alport syndrome\x2c X-linked recessive(ClinVar)	Alport syndrome	C1567741	ASLN|ATS|CA54|MGC167109|MGC42377	2207	H0Y998:H0Y9H0:H0Y9R8:P29400	NP_000486.1:NP_203699.1:XP_006724679.1
Core matrisome	Collagens	COL4A5	collagen, type IV, alpha 5	2207	p.GLY415ARG	Alport syndrome\x2c X-linked recessive(ClinVar)	Alport syndrome	C1567741	ASLN|ATS|CA54|MGC167109|MGC42377	2207	H0Y998:H0Y9H0:H0Y9R8:P29400	NP_000486.1:NP_203699.1:XP_006724679.1
Core matrisome	Collagens	COL4A5	collagen, type IV, alpha 5	2207	p.GLY423GLU	Alport syndrome\x2c X-linked recessive(ClinVar)	Alport syndrome	C1567741	ASLN|ATS|CA54|MGC167109|MGC42377	2207	H0Y998:H0Y9H0:H0Y9R8:P29400	NP_000486.1:NP_203699.1:XP_006724679.1
Core matrisome	Collagens	COL4A5	collagen, type IV, alpha 5	2207	p.GLY426ARG	Alport syndrome\x2c X-linked recessive(ClinVar)	Alport syndrome	C1567741	ASLN|ATS|CA54|MGC167109|MGC42377	2207	H0Y998:H0Y9H0:H0Y9R8:P29400	NP_000486.1:NP_203699.1:XP_006724679.1
Core matrisome	Collagens	COL4A5	collagen, type IV, alpha 5	2207	p.GLY429GLU	Alport syndrome\x2c X-linked recessive(ClinVar)	Alport syndrome	C1567741	ASLN|ATS|CA54|MGC167109|MGC42377	2207	H0Y998:H0Y9H0:H0Y9R8:P29400	NP_000486.1:NP_203699.1:XP_006724679.1
Core matrisome	Collagens	COL4A5	collagen, type IV, alpha 5	2207	p.GLY466GLU	Alport syndrome\x2c X-linked recessive(ClinVar)	Alport syndrome	C1567741	ASLN|ATS|CA54|MGC167109|MGC42377	2207	H0Y998:H0Y9H0:H0Y9R8:P29400	NP_000486.1:NP_203699.1:XP_006724679.1
Core matrisome	Collagens	COL4A5	collagen, type IV, alpha 5	2207	p.GLY469GLU	Alport syndrome\x2c X-linked recessive(ClinVar)	Alport syndrome	C1567741	ASLN|ATS|CA54|MGC167109|MGC42377	2207	H0Y998:H0Y9H0:H0Y9R8:P29400	NP_000486.1:NP_203699.1:XP_006724679.1
Core matrisome	Collagens	COL4A5	collagen, type IV, alpha 5	2207	p.GLY472ARG	Alport syndrome\x2c X-linked recessive(ClinVar)	Alport syndrome	C1567741	ASLN|ATS|CA54|MGC167109|MGC42377	2207	H0Y998:H0Y9H0:H0Y9R8:P29400	NP_000486.1:NP_203699.1:XP_006724679.1
Core matrisome	Collagens	COL4A5	collagen, type IV, alpha 5	2207	p.GLY491GLU	Alport syndrome\x2c X-linked recessive(ClinVar)	Alport syndrome	C1567741	ASLN|ATS|CA54|MGC167109|MGC42377	2207	H0Y998:H0Y9H0:H0Y9R8:P29400	NP_000486.1:NP_203699.1:XP_006724679.1
Core matrisome	Collagens	COL4A5	collagen, type IV, alpha 5	2207	p.GLY494ASP	Alport syndrome\x2c X-linked recessive(ClinVar)	Alport syndrome	C1567741	ASLN|ATS|CA54|MGC167109|MGC42377	2207	H0Y998:H0Y9H0:H0Y9R8:P29400	NP_000486.1:NP_203699.1:XP_006724679.1
Core matrisome	Collagens	COL4A5	collagen, type IV, alpha 5	2207	p.GLY497CYS	Alport syndrome\x2c X-linked recessive(ClinVar)	Alport syndrome	C1567741	ASLN|ATS|CA54|MGC167109|MGC42377	2207	H0Y998:H0Y9H0:H0Y9R8:P29400	NP_000486.1:NP_203699.1:XP_006724679.1
Core matrisome	Collagens	COL4A5	collagen, type IV, alpha 5	2207	p.GLY521ASP	Alport syndrome\x2c X-linked recessive(ClinVar)	Alport syndrome	C1567741	ASLN|ATS|CA54|MGC167109|MGC42377	2207	H0Y998:H0Y9H0:H0Y9R8:P29400	NP_000486.1:NP_203699.1:XP_006724679.1
Core matrisome	Collagens	COL4A5	collagen, type IV, alpha 5	2207	p.GLY521CYS	Alport syndrome\x2c X-linked recessive(ClinVar)	Alport syndrome	C1567741	ASLN|ATS|CA54|MGC167109|MGC42377	2207	H0Y998:H0Y9H0:H0Y9R8:P29400	NP_000486.1:NP_203699.1:XP_006724679.1
Core matrisome	Collagens	COL4A5	collagen, type IV, alpha 5	2207	p.GLY524ASP	Alport syndrome\x2c X-linked recessive(ClinVar)	Alport syndrome	C1567741	ASLN|ATS|CA54|MGC167109|MGC42377	2207	H0Y998:H0Y9H0:H0Y9R8:P29400	NP_000486.1:NP_203699.1:XP_006724679.1
Core matrisome	Collagens	COL4A5	collagen, type IV, alpha 5	2207	p.GLY536ASP	Alport syndrome\x2c X-linked recessive(ClinVar)	Alport syndrome	C1567741	ASLN|ATS|CA54|MGC167109|MGC42377	2207	H0Y998:H0Y9H0:H0Y9R8:P29400	NP_000486.1:NP_203699.1:XP_006724679.1
Core matrisome	Collagens	COL4A5	collagen, type IV, alpha 5	2207	p.GLY545ARG	Alport syndrome\x2c X-linked recessive(ClinVar)	Alport syndrome	C1567741	ASLN|ATS|CA54|MGC167109|MGC42377	2207	H0Y998:H0Y9H0:H0Y9R8:P29400	NP_000486.1:NP_203699.1:XP_006724679.1
Core matrisome	Collagens	COL4A5	collagen, type IV, alpha 5	2207	p.GLY545VAL	Alport syndrome\x2c X-linked recessive(ClinVar)	Alport syndrome	C1567741	ASLN|ATS|CA54|MGC167109|MGC42377	2207	H0Y998:H0Y9H0:H0Y9R8:P29400	NP_000486.1:NP_203699.1:XP_006724679.1
Core matrisome	Collagens	COL4A5	collagen, type IV, alpha 5	2207	p.GLY54ASP	Alport syndrome\x2c X-linked recessive(ClinVar)	Alport syndrome	C1567741	ASLN|ATS|CA54|MGC167109|MGC42377	2207	H0Y998:H0Y9H0:H0Y9R8:P29400	NP_000486.1:NP_203699.1:XP_006724679.1
Core matrisome	Collagens	COL4A5	collagen, type IV, alpha 5	2207	p.GLY558ARG	Alport syndrome\x2c X-linked recessive(ClinVar)	Alport syndrome	C1567741	ASLN|ATS|CA54|MGC167109|MGC42377	2207	H0Y998:H0Y9H0:H0Y9R8:P29400	NP_000486.1:NP_203699.1:XP_006724679.1
Core matrisome	Collagens	COL4A5	collagen, type IV, alpha 5	2207	p.GLY561ARG	Alport syndrome\x2c X-linked recessive(ClinVar)	Alport syndrome	C1567741	ASLN|ATS|CA54|MGC167109|MGC42377	2207	H0Y998:H0Y9H0:H0Y9R8:P29400	NP_000486.1:NP_203699.1:XP_006724679.1
Core matrisome	Collagens	COL4A5	collagen, type IV, alpha 5	2207	p.GLY567ALA	Alport syndrome\x2c X-linked recessive(ClinVar)	Alport syndrome	C1567741	ASLN|ATS|CA54|MGC167109|MGC42377	2207	H0Y998:H0Y9H0:H0Y9R8:P29400	NP_000486.1:NP_203699.1:XP_006724679.1
Core matrisome	Collagens	COL4A5	collagen, type IV, alpha 5	2207	p.GLY573ASP	Alport syndrome\x2c X-linked recessive(ClinVar)	Alport syndrome	C1567741	ASLN|ATS|CA54|MGC167109|MGC42377	2207	H0Y998:H0Y9H0:H0Y9R8:P29400	NP_000486.1:NP_203699.1:XP_006724679.1
Core matrisome	Collagens	COL4A5	collagen, type IV, alpha 5	2207	p.GLY579ARG	Alport syndrome\x2c X-linked recessive(ClinVar)	Alport syndrome	C1567741	ASLN|ATS|CA54|MGC167109|MGC42377	2207	H0Y998:H0Y9H0:H0Y9R8:P29400	NP_000486.1:NP_203699.1:XP_006724679.1
Core matrisome	Collagens	COL4A5	collagen, type IV, alpha 5	2207	p.GLY579GLU	Alport syndrome\x2c X-linked recessive(ClinVar)	Alport syndrome	C1567741	ASLN|ATS|CA54|MGC167109|MGC42377	2207	H0Y998:H0Y9H0:H0Y9R8:P29400	NP_000486.1:NP_203699.1:XP_006724679.1
Core matrisome	Collagens	COL4A5	collagen, type IV, alpha 5	2207	p.GLY594SER	Alport syndrome\x2c X-linked recessive(ClinVar)	Alport syndrome	C1567741	ASLN|ATS|CA54|MGC167109|MGC42377	2207	H0Y998:H0Y9H0:H0Y9R8:P29400	NP_000486.1:NP_203699.1:XP_006724679.1
Core matrisome	Collagens	COL4A5	collagen, type IV, alpha 5	2207	p.GLY595ARG	Alport syndrome\x2c X-linked recessive(ClinVar)	Alport syndrome	C1567741	ASLN|ATS|CA54|MGC167109|MGC42377	2207	H0Y998:H0Y9H0:H0Y9R8:P29400	NP_000486.1:NP_203699.1:XP_006724679.1
Core matrisome	Collagens	COL4A5	collagen, type IV, alpha 5	2207	p.GLY5TER	Alport syndrome\x2c X-linked recessive(ClinVar)	Alport syndrome	C1567741	ASLN|ATS|CA54|MGC167109|MGC42377	2207	H0Y998:H0Y9H0:H0Y9R8:P29400	NP_000486.1:NP_203699.1:XP_006724679.1
Core matrisome	Collagens	COL4A5	collagen, type IV, alpha 5	2207	p.GLY603VAL	Alport syndrome\x2c X-linked recessive(ClinVar)	Alport syndrome	C1567741	ASLN|ATS|CA54|MGC167109|MGC42377	2207	H0Y998:H0Y9H0:H0Y9R8:P29400	NP_000486.1:NP_203699.1:XP_006724679.1
Core matrisome	Collagens	COL4A5	collagen, type IV, alpha 5	2207	p.GLY609ARG	Alport syndrome\x2c X-linked recessive(ClinVar)	Alport syndrome	C1567741	ASLN|ATS|CA54|MGC167109|MGC42377	2207	H0Y998:H0Y9H0:H0Y9R8:P29400	NP_000486.1:NP_203699.1:XP_006724679.1
Core matrisome	Collagens	COL4A5	collagen, type IV, alpha 5	2207	p.GLY609VAL	Alport syndrome\x2c X-linked recessive(ClinVar)	Alport syndrome	C1567741	ASLN|ATS|CA54|MGC167109|MGC42377	2207	H0Y998:H0Y9H0:H0Y9R8:P29400	NP_000486.1:NP_203699.1:XP_006724679.1
Core matrisome	Collagens	COL4A5	collagen, type IV, alpha 5	2207	p.GLY621CYS	Alport syndrome\x2c X-linked recessive(ClinVar)	Alport syndrome	C1567741	ASLN|ATS|CA54|MGC167109|MGC42377	2207	H0Y998:H0Y9H0:H0Y9R8:P29400	NP_000486.1:NP_203699.1:XP_006724679.1
Core matrisome	Collagens	COL4A5	collagen, type IV, alpha 5	2207	p.GLY624ASP	Alport syndrome\x2c X-linked recessive(ClinVar)	Alport syndrome	C1567741	ASLN|ATS|CA54|MGC167109|MGC42377	2207	H0Y998:H0Y9H0:H0Y9R8:P29400	NP_000486.1:NP_203699.1:XP_006724679.1
Core matrisome	Collagens	COL4A5	collagen, type IV, alpha 5	2207	p.GLY626ALA	Alport syndrome\x2c X-linked recessive(ClinVar)	Alport syndrome	C1567741	ASLN|ATS|CA54|MGC167109|MGC42377	2207	H0Y998:H0Y9H0:H0Y9R8:P29400	NP_000486.1:NP_203699.1:XP_006724679.1
Core matrisome	Collagens	COL4A5	collagen, type IV, alpha 5	2207	p.GLY629ASP	Alport syndrome\x2c X-linked recessive(ClinVar)	Alport syndrome	C1567741	ASLN|ATS|CA54|MGC167109|MGC42377	2207	H0Y998:H0Y9H0:H0Y9R8:P29400	NP_000486.1:NP_203699.1:XP_006724679.1
Core matrisome	Collagens	COL4A5	collagen, type IV, alpha 5	2207	p.GLY632ASP	Alport syndrome\x2c X-linked recessive(ClinVar)	Alport syndrome	C1567741	ASLN|ATS|CA54|MGC167109|MGC42377	2207	H0Y998:H0Y9H0:H0Y9R8:P29400	NP_000486.1:NP_203699.1:XP_006724679.1
Core matrisome	Collagens	COL4A5	collagen, type IV, alpha 5	2207	p.GLY638ASP	.,Alport syndrome\x2c X-linked recessive,Alport syndrome\x2c X-linked recessive(ClinVar)	Alport syndrome, X-linked	C1567742	ASLN|ATS|CA54|MGC167109|MGC42377	2207	H0Y998:H0Y9H0:H0Y9R8:P29400	NP_000486.1:NP_203699.1:XP_006724679.1
Core matrisome	Collagens	COL4A5	collagen, type IV, alpha 5	2207	p.GLY638SER	Alport syndrome\x2c X-linked recessive(ClinVar)	Alport syndrome	C1567741	ASLN|ATS|CA54|MGC167109|MGC42377	2207	H0Y998:H0Y9H0:H0Y9R8:P29400	NP_000486.1:NP_203699.1:XP_006724679.1
Core matrisome	Collagens	COL4A5	collagen, type IV, alpha 5	2207	p.GLY653ARG	Alport syndrome\x2c X-linked recessive(ClinVar)	Alport syndrome	C1567741	ASLN|ATS|CA54|MGC167109|MGC42377	2207	H0Y998:H0Y9H0:H0Y9R8:P29400	NP_000486.1:NP_203699.1:XP_006724679.1
Core matrisome	Collagens	COL4A5	collagen, type IV, alpha 5	2207	p.GLY666ASP	Alport syndrome\x2c X-linked recessive,.(ClinVar)	Alport syndrome	C1567741	ASLN|ATS|CA54|MGC167109|MGC42377	2207	H0Y998:H0Y9H0:H0Y9R8:P29400	NP_000486.1:NP_203699.1:XP_006724679.1
Core matrisome	Collagens	COL4A5	collagen, type IV, alpha 5	2207	p.GLY669ALA	Alport syndrome\x2c X-linked recessive(ClinVar)	Alport syndrome	C1567741	ASLN|ATS|CA54|MGC167109|MGC42377	2207	H0Y998:H0Y9H0:H0Y9R8:P29400	NP_000486.1:NP_203699.1:XP_006724679.1
Core matrisome	Collagens	COL4A5	collagen, type IV, alpha 5	2207	p.GLY675SER	Alport syndrome\x2c X-linked recessive(ClinVar)	Alport syndrome	C1567741	ASLN|ATS|CA54|MGC167109|MGC42377	2207	H0Y998:H0Y9H0:H0Y9R8:P29400	NP_000486.1:NP_203699.1:XP_006724679.1
Core matrisome	Collagens	COL4A5	collagen, type IV, alpha 5	2207	p.GLY681ASP	Alport syndrome\x2c X-linked recessive(ClinVar)	Alport syndrome	C1567741	ASLN|ATS|CA54|MGC167109|MGC42377	2207	H0Y998:H0Y9H0:H0Y9R8:P29400	NP_000486.1:NP_203699.1:XP_006724679.1
Core matrisome	Collagens	COL4A5	collagen, type IV, alpha 5	2207	p.GLY684TER	Alport syndrome\x2c X-linked recessive(ClinVar)	Alport syndrome	C1567741	ASLN|ATS|CA54|MGC167109|MGC42377	2207	H0Y998:H0Y9H0:H0Y9R8:P29400	NP_000486.1:NP_203699.1:XP_006724679.1
Core matrisome	Collagens	COL4A5	collagen, type IV, alpha 5	2207	p.GLY684VAL	Alport syndrome\x2c X-linked recessive(ClinVar)	Alport syndrome	C1567741	ASLN|ATS|CA54|MGC167109|MGC42377	2207	H0Y998:H0Y9H0:H0Y9R8:P29400	NP_000486.1:NP_203699.1:XP_006724679.1
Core matrisome	Collagens	COL4A5	collagen, type IV, alpha 5	2207	p.GLY687GLU	Alport syndrome\x2c X-linked recessive(ClinVar)	Alport syndrome	C1567741	ASLN|ATS|CA54|MGC167109|MGC42377	2207	H0Y998:H0Y9H0:H0Y9R8:P29400	NP_000486.1:NP_203699.1:XP_006724679.1
Core matrisome	Collagens	COL4A5	collagen, type IV, alpha 5	2207	p.GLY722GLU	Alport syndrome\x2c X-linked recessive(ClinVar)	Alport syndrome	C1567741	ASLN|ATS|CA54|MGC167109|MGC42377	2207	H0Y998:H0Y9H0:H0Y9R8:P29400	NP_000486.1:NP_203699.1:XP_006724679.1
Core matrisome	Collagens	COL4A5	collagen, type IV, alpha 5	2207	p.GLY740GLU	Alport syndrome\x2c X-linked recessive(ClinVar)	Alport syndrome	C1567741	ASLN|ATS|CA54|MGC167109|MGC42377	2207	H0Y998:H0Y9H0:H0Y9R8:P29400	NP_000486.1:NP_203699.1:XP_006724679.1
Core matrisome	Collagens	COL4A5	collagen, type IV, alpha 5	2207	p.GLY743ASP	Alport syndrome\x2c X-linked recessive(ClinVar)	Alport syndrome	C1567741	ASLN|ATS|CA54|MGC167109|MGC42377	2207	H0Y998:H0Y9H0:H0Y9R8:P29400	NP_000486.1:NP_203699.1:XP_006724679.1
Core matrisome	Collagens	COL4A5	collagen, type IV, alpha 5	2207	p.GLY763ARG	Alport syndrome\x2c X-linked recessive(ClinVar)	Alport syndrome	C1567741	ASLN|ATS|CA54|MGC167109|MGC42377	2207	H0Y998:H0Y9H0:H0Y9R8:P29400	NP_000486.1:NP_203699.1:XP_006724679.1
Core matrisome	Collagens	COL4A5	collagen, type IV, alpha 5	2207	p.GLY766ASP	Alport syndrome\x2c X-linked recessive(ClinVar)	Alport syndrome	C1567741	ASLN|ATS|CA54|MGC167109|MGC42377	2207	H0Y998:H0Y9H0:H0Y9R8:P29400	NP_000486.1:NP_203699.1:XP_006724679.1
Core matrisome	Collagens	COL4A5	collagen, type IV, alpha 5	2207	p.GLY772ASP	Alport syndrome\x2c X-linked recessive,Alport syndrome\x2c X-linked recessive(ClinVar)	Alport syndrome	C1567741	ASLN|ATS|CA54|MGC167109|MGC42377	2207	H0Y998:H0Y9H0:H0Y9R8:P29400	NP_000486.1:NP_203699.1:XP_006724679.1
Core matrisome	Collagens	COL4A5	collagen, type IV, alpha 5	2207	p.GLY778SER	Alport syndrome\x2c X-linked recessive(ClinVar)	Alport syndrome	C1567741	ASLN|ATS|CA54|MGC167109|MGC42377	2207	H0Y998:H0Y9H0:H0Y9R8:P29400	NP_000486.1:NP_203699.1:XP_006724679.1
Core matrisome	Collagens	COL4A5	collagen, type IV, alpha 5	2207	p.GLY787VAL	Alport syndrome\x2c X-linked recessive(ClinVar)	Alport syndrome	C1567741	ASLN|ATS|CA54|MGC167109|MGC42377	2207	H0Y998:H0Y9H0:H0Y9R8:P29400	NP_000486.1:NP_203699.1:XP_006724679.1
Core matrisome	Collagens	COL4A5	collagen, type IV, alpha 5	2207	p.GLY796ARG	Alport syndrome\x2c X-linked recessive(ClinVar)	Alport syndrome	C1567741	ASLN|ATS|CA54|MGC167109|MGC42377	2207	H0Y998:H0Y9H0:H0Y9R8:P29400	NP_000486.1:NP_203699.1:XP_006724679.1
Core matrisome	Collagens	COL4A5	collagen, type IV, alpha 5	2207	p.GLY802ARG	Alport syndrome\x2c X-linked recessive(ClinVar)	Alport syndrome	C1567741	ASLN|ATS|CA54|MGC167109|MGC42377	2207	H0Y998:H0Y9H0:H0Y9R8:P29400	NP_000486.1:NP_203699.1:XP_006724679.1
Core matrisome	Collagens	COL4A5	collagen, type IV, alpha 5	2207	p.GLY808GLU	Alport syndrome\x2c X-linked recessive(ClinVar)	Alport syndrome	C1567741	ASLN|ATS|CA54|MGC167109|MGC42377	2207	H0Y998:H0Y9H0:H0Y9R8:P29400	NP_000486.1:NP_203699.1:XP_006724679.1
Core matrisome	Collagens	COL4A5	collagen, type IV, alpha 5	2207	p.GLY811ARG	Alport syndrome\x2c X-linked recessive(ClinVar)	Alport syndrome	C1567741	ASLN|ATS|CA54|MGC167109|MGC42377	2207	H0Y998:H0Y9H0:H0Y9R8:P29400	NP_000486.1:NP_203699.1:XP_006724679.1
Core matrisome	Collagens	COL4A5	collagen, type IV, alpha 5	2207	p.GLY811VAL	Alport syndrome\x2c X-linked recessive(ClinVar)	Alport syndrome	C1567741	ASLN|ATS|CA54|MGC167109|MGC42377	2207	H0Y998:H0Y9H0:H0Y9R8:P29400	NP_000486.1:NP_203699.1:XP_006724679.1
Core matrisome	Collagens	COL4A5	collagen, type IV, alpha 5	2207	p.GLY822ARG	Alport syndrome\x2c X-linked recessive(ClinVar)	Alport syndrome	C1567741	ASLN|ATS|CA54|MGC167109|MGC42377	2207	H0Y998:H0Y9H0:H0Y9R8:P29400	NP_000486.1:NP_203699.1:XP_006724679.1
Core matrisome	Collagens	COL4A5	collagen, type IV, alpha 5	2207	p.GLY852ARG	Alport syndrome\x2c X-linked recessive(ClinVar)	Alport syndrome	C1567741	ASLN|ATS|CA54|MGC167109|MGC42377	2207	H0Y998:H0Y9H0:H0Y9R8:P29400	NP_000486.1:NP_203699.1:XP_006724679.1
Core matrisome	Collagens	COL4A5	collagen, type IV, alpha 5	2207	p.GLY852GLU	Alport syndrome\x2c X-linked recessive(ClinVar)	Alport syndrome	C1567741	ASLN|ATS|CA54|MGC167109|MGC42377	2207	H0Y998:H0Y9H0:H0Y9R8:P29400	NP_000486.1:NP_203699.1:XP_006724679.1
Core matrisome	Collagens	COL4A5	collagen, type IV, alpha 5	2207	p.GLY866GLU	Alport syndrome\x2c X-linked recessive(ClinVar)	Alport syndrome	C1567741	ASLN|ATS|CA54|MGC167109|MGC42377	2207	H0Y998:H0Y9H0:H0Y9R8:P29400	NP_000486.1:NP_203699.1:XP_006724679.1
Core matrisome	Collagens	COL4A5	collagen, type IV, alpha 5	2207	p.GLY869ARG	Alport syndrome\x2c X-linked recessive(ClinVar)	Alport syndrome	C1567741	ASLN|ATS|CA54|MGC167109|MGC42377	2207	H0Y998:H0Y9H0:H0Y9R8:P29400	NP_000486.1:NP_203699.1:XP_006724679.1
Core matrisome	Collagens	COL4A5	collagen, type IV, alpha 5	2207	p.GLY872ARG	Alport syndrome\x2c X-linked recessive(ClinVar)	Alport syndrome	C1567741	ASLN|ATS|CA54|MGC167109|MGC42377	2207	H0Y998:H0Y9H0:H0Y9R8:P29400	NP_000486.1:NP_203699.1:XP_006724679.1
Core matrisome	Collagens	COL4A5	collagen, type IV, alpha 5	2207	p.GLY875GLU	Alport syndrome\x2c X-linked recessive(ClinVar)	Alport syndrome	C1567741	ASLN|ATS|CA54|MGC167109|MGC42377	2207	H0Y998:H0Y9H0:H0Y9R8:P29400	NP_000486.1:NP_203699.1:XP_006724679.1
Core matrisome	Collagens	COL4A5	collagen, type IV, alpha 5	2207	p.GLY878VAL	Alport syndrome\x2c X-linked recessive(ClinVar)	Alport syndrome	C1567741	ASLN|ATS|CA54|MGC167109|MGC42377	2207	H0Y998:H0Y9H0:H0Y9R8:P29400	NP_000486.1:NP_203699.1:XP_006724679.1
Core matrisome	Collagens	COL4A5	collagen, type IV, alpha 5	2207	p.GLY887VAL	Alport syndrome\x2c X-linked recessive(ClinVar)	Alport syndrome	C1567741	ASLN|ATS|CA54|MGC167109|MGC42377	2207	H0Y998:H0Y9H0:H0Y9R8:P29400	NP_000486.1:NP_203699.1:XP_006724679.1
Core matrisome	Collagens	COL4A5	collagen, type IV, alpha 5	2207	p.GLY902GLU	Alport syndrome\x2c X-linked recessive(ClinVar)	Alport syndrome, X-linked	C1567742	ASLN|ATS|CA54|MGC167109|MGC42377	2207	H0Y998:H0Y9H0:H0Y9R8:P29400	NP_000486.1:NP_203699.1:XP_006724679.1
Core matrisome	Collagens	COL4A5	collagen, type IV, alpha 5	2207	p.GLY911GLU	Alport syndrome\x2c X-linked recessive(ClinVar)	Alport syndrome	C1567741	ASLN|ATS|CA54|MGC167109|MGC42377	2207	H0Y998:H0Y9H0:H0Y9R8:P29400	NP_000486.1:NP_203699.1:XP_006724679.1
Core matrisome	Collagens	COL4A5	collagen, type IV, alpha 5	2207	p.GLY935ASP	Alport syndrome\x2c X-linked recessive(ClinVar)	Alport syndrome	C1567741	ASLN|ATS|CA54|MGC167109|MGC42377	2207	H0Y998:H0Y9H0:H0Y9R8:P29400	NP_000486.1:NP_203699.1:XP_006724679.1
Core matrisome	Collagens	COL4A5	collagen, type IV, alpha 5	2207	p.GLY941CYS	Alport syndrome\x2c X-linked recessive(ClinVar)	Alport syndrome	C1567741	ASLN|ATS|CA54|MGC167109|MGC42377	2207	H0Y998:H0Y9H0:H0Y9R8:P29400	NP_000486.1:NP_203699.1:XP_006724679.1
Core matrisome	Collagens	COL4A5	collagen, type IV, alpha 5	2207	p.GLY947ASP	Alport syndrome\x2c X-linked recessive(ClinVar)	Alport syndrome	C1567741	ASLN|ATS|CA54|MGC167109|MGC42377	2207	H0Y998:H0Y9H0:H0Y9R8:P29400	NP_000486.1:NP_203699.1:XP_006724679.1
Core matrisome	Collagens	COL4A5	collagen, type IV, alpha 5	2207	p.GLY953VAL	Alport syndrome\x2c X-linked recessive(ClinVar)	Alport syndrome	C1567741	ASLN|ATS|CA54|MGC167109|MGC42377	2207	H0Y998:H0Y9H0:H0Y9R8:P29400	NP_000486.1:NP_203699.1:XP_006724679.1
Core matrisome	Collagens	COL4A5	collagen, type IV, alpha 5	2207	p.LEU1649ARG	Alport syndrome\x2c X-linked recessive(ClinVar)	Alport syndrome	C1567741	ASLN|ATS|CA54|MGC167109|MGC42377	2207	H0Y998:H0Y9H0:H0Y9R8:P29400	NP_000486.1:NP_203699.1:XP_006724679.1
Core matrisome	Collagens	COL4A5	collagen, type IV, alpha 5	2207	p.LYS1097TER	Alport syndrome\x2c X-linked recessive(ClinVar)	Alport syndrome	C1567741	ASLN|ATS|CA54|MGC167109|MGC42377	2207	H0Y998:H0Y9H0:H0Y9R8:P29400	NP_000486.1:NP_203699.1:XP_006724679.1
Core matrisome	Collagens	COL4A5	collagen, type IV, alpha 5	2207	p.LYS1320TER	Alport syndrome\x2c X-linked recessive(ClinVar)	Alport syndrome	C1567741	ASLN|ATS|CA54|MGC167109|MGC42377	2207	H0Y998:H0Y9H0:H0Y9R8:P29400	NP_000486.1:NP_203699.1:XP_006724679.1
Core matrisome	Collagens	COL4A5	collagen, type IV, alpha 5	2207	p.MET1VAL	Alport syndrome\x2c X-linked recessive(ClinVar)	Alport syndrome	C1567741	ASLN|ATS|CA54|MGC167109|MGC42377	2207	H0Y998:H0Y9H0:H0Y9R8:P29400	NP_000486.1:NP_203699.1:XP_006724679.1
Core matrisome	Collagens	COL4A5	collagen, type IV, alpha 5	2207	p.MET898VAL	Alport syndrome\x2c X-linked recessive(ClinVar)	Alport syndrome	C1567741	ASLN|ATS|CA54|MGC167109|MGC42377	2207	H0Y998:H0Y9H0:H0Y9R8:P29400	NP_000486.1:NP_203699.1:XP_006724679.1
Core matrisome	Collagens	COL4A5	collagen, type IV, alpha 5	2207	p.PRO739ALA	Alport syndrome\x2c X-linked recessive(ClinVar)	Alport syndrome, X-linked	C1567742	ASLN|ATS|CA54|MGC167109|MGC42377	2207	H0Y998:H0Y9H0:H0Y9R8:P29400	NP_000486.1:NP_203699.1:XP_006724679.1
Core matrisome	Collagens	COL4A5	collagen, type IV, alpha 5	2207	p.SER1071TER	Alport syndrome\x2c X-linked recessive(ClinVar)	Alport syndrome	C1567741	ASLN|ATS|CA54|MGC167109|MGC42377	2207	H0Y998:H0Y9H0:H0Y9R8:P29400	NP_000486.1:NP_203699.1:XP_006724679.1
Core matrisome	Collagens	COL4A5	collagen, type IV, alpha 5	2207	p.SER1488PHE	Alport syndrome\x2c X-linked recessive(ClinVar)	Alport syndrome	C1567741	ASLN|ATS|CA54|MGC167109|MGC42377	2207	H0Y998:H0Y9H0:H0Y9R8:P29400	NP_000486.1:NP_203699.1:XP_006724679.1
Core matrisome	Collagens	COL4A5	collagen, type IV, alpha 5	2207	p.SER1659ASN	Alport syndrome\x2c X-linked recessive(ClinVar)	Alport syndrome, X-linked	C1567742	ASLN|ATS|CA54|MGC167109|MGC42377	2207	H0Y998:H0Y9H0:H0Y9R8:P29400	NP_000486.1:NP_203699.1:XP_006724679.1
Core matrisome	Collagens	COL4A5	collagen, type IV, alpha 5	2207	p.SER916GLY	Alport syndrome\x2c X-linked recessive(ClinVar)	Alport syndrome	C1567741	ASLN|ATS|CA54|MGC167109|MGC42377	2207	H0Y998:H0Y9H0:H0Y9R8:P29400	NP_000486.1:NP_203699.1:XP_006724679.1
Core matrisome	Collagens	COL4A5	collagen, type IV, alpha 5	2207	p.TRP1538TER	Alport syndrome\x2c X-linked recessive(ClinVar)	Alport syndrome	C1567741	ASLN|ATS|CA54|MGC167109|MGC42377	2207	H0Y998:H0Y9H0:H0Y9R8:P29400	NP_000486.1:NP_203699.1:XP_006724679.1
Core matrisome	Collagens	COL4A5	collagen, type IV, alpha 5	2207	p.TRP1590GLY	Alport syndrome\x2c X-linked recessive(ClinVar)	Alport syndrome	C1567741	ASLN|ATS|CA54|MGC167109|MGC42377	2207	H0Y998:H0Y9H0:H0Y9R8:P29400	NP_000486.1:NP_203699.1:XP_006724679.1
Core matrisome	Collagens	COL4A5	collagen, type IV, alpha 5	2207	p.TYR1597TER	Alport syndrome\x2c X-linked recessive(ClinVar)	Alport syndrome	C1567741	ASLN|ATS|CA54|MGC167109|MGC42377	2207	H0Y998:H0Y9H0:H0Y9R8:P29400	NP_000486.1:NP_203699.1:XP_006724679.1
Core matrisome	Collagens	COL4A5	collagen, type IV, alpha 5	2207	p.TYR30TER	Alport syndrome\x2c X-linked recessive(ClinVar)	Alport syndrome	C1567741	ASLN|ATS|CA54|MGC167109|MGC42377	2207	H0Y998:H0Y9H0:H0Y9R8:P29400	NP_000486.1:NP_203699.1:XP_006724679.1
Core matrisome	Collagens	COL5A1	collagen, type V, alpha 1	2209	p.ARG792TER	Ehlers-Danlos syndrome\x2c type 1(ClinVar)	Ehlers-Danlos syndrome, type 1	C0268335	-	2209	H7BY82:P20908	NP_000084.3
Core matrisome	Collagens	COL5A1	collagen, type V, alpha 1	2209	p.CYS1639SER	Ehlers-Danlos syndrome\x2c type 1|Ehlers-Danlos syndrome\x2c type 2(ClinVar)	Ehlers-Danlos syndrome	C0013720	-	2209	H7BY82:P20908	NP_000084.3
Core matrisome	Collagens	COL5A1	collagen, type V, alpha 1	2209	p.GLY1489GLU	Ehlers-Danlos syndrome\x2c type 1(ClinVar)	Ehlers-Danlos syndrome	C0013720	-	2209	H7BY82:P20908	NP_000084.3
Core matrisome	Collagens	COL5A1	collagen, type V, alpha 1	2209	p.GLY530SER	Ehlers-Danlos syndrome\x2c type 2(ClinVar)	Ehlers-Danlos syndrome	C0013720	-	2209	H7BY82:P20908	NP_000084.3
Core matrisome	Collagens	COL5A2	collagen, type V, alpha 2	2210	p.GLY1149ARG	Ehlers-Danlos syndrome\x2c type 2(ClinVar)	Ehlers-Danlos syndrome, type 2	C0268336	MGC105115	2210	P05997	NP_000384.2
Core matrisome	Collagens	COL6A1	collagen, type VI, alpha 1	2211	p.GLY281ARG	Ullrich congenital muscular dystrophy\x2c digenic\x2c col6a1/col6a2(ClinVar)	Ullrich congenital muscular dystrophy	C0410179	OPLL	2211	P12109	NP_001839.2
Core matrisome	Collagens	COL6A1	collagen, type VI, alpha 1	2211	p.GLY284ARG	Ullrich congenital muscular dystrophy\x2c autosomal dominant(ClinVar)	Ullrich congenital muscular dystrophy	C0410179	OPLL	2211	P12109	NP_001839.2
Core matrisome	Collagens	COL6A1	collagen, type VI, alpha 1	2211	p.GLY290ARG	Ullrich congenital muscular dystrophy\x2c autosomal dominant(ClinVar)	Bethlem myopathy	C1834674	OPLL	2211	P12109	NP_001839.2
Core matrisome	Collagens	COL6A1	collagen, type VI, alpha 1	2211	p.GLY526VAL	Bethlem myopathy(ClinVar)	Bethlem myopathy	C1834674	OPLL	2211	P12109	NP_001839.2
Core matrisome	Collagens	COL6A1	collagen, type VI, alpha 1	2211	p.TYR659TER	Ullrich congenital muscular dystrophy\x2c autosomal recessive(ClinVar)	Ullrich congenital muscular dystrophy	C0410179	OPLL	2211	P12109	NP_001839.2
Core matrisome	Collagens	COL6A2	collagen, type VI, alpha 2	2212	p.ARG498HIS	Ullrich congenital muscular dystrophy\x2c digenic\x2c col6a1/col6a2(ClinVar)	Ullrich congenital muscular dystrophy	C0410179	DKFZp586E1322|FLJ46862|PP3610	2212	C9JH44:H7C0M5:P12110	NP_001840.3:NP_478054.2:NP_478055.2
Core matrisome	Collagens	COL6A2	collagen, type VI, alpha 2	2212	p.CYS777ARG	Ullrich congenital muscular dystrophy\x2c autosomal recessive(ClinVar)	BM	C0005126;C0006416;C0011135;C1704651	DKFZp586E1322|FLJ46862|PP3610	2212	C9JH44:H7C0M5:P12110	NP_001840.3:NP_478054.2:NP_478055.2
Core matrisome	Collagens	COL6A2	collagen, type VI, alpha 2	2212	p.GLN819TER	Myosclerosis\x2c autosomal recessive|BETHLEM MYOPATHY\x2c AUTOSOMAL RECESSIVE(ClinVar)	BETHLEM MYOPATHY, AUTOSOMAL RECESSIVE	C4015962	DKFZp586E1322|FLJ46862|PP3610	2212	C9JH44:H7C0M5:P12110	NP_001840.3:NP_478054.2:NP_478055.2
Core matrisome	Collagens	COL6A2	collagen, type VI, alpha 2	2212	p.GLY283ARG	Ullrich congenital muscular dystrophy\x2c autosomal dominant(ClinVar)	Ullrich congenital muscular dystrophy	C0410179	DKFZp586E1322|FLJ46862|PP3610	2212	C9JH44:H7C0M5:P12110	NP_001840.3:NP_478054.2:NP_478055.2
Core matrisome	Collagens	COL6A3	collagen, type VI, alpha 3	2213	p.ARG465TER	Ullrich congenital muscular dystrophy\x2c autosomal recessive(ClinVar)	Ullrich congenital muscular dystrophy	C0410179	DKFZp686D23123|DKFZp686K04147|DKFZp686N0262|FLJ347	2213	C9JNG9:E7ENL6:E9PCV6:I3L392:P12111	NP_004360.2:NP_476505.3:NP_476506.3:NP_476507.3:NP_476508.2:XP_005246122.1
Core matrisome	Collagens	COL7A1	collagen, type VII, alpha 1	2214	p.ARG1630TER	Epidermolysis bullosa pruriginosa\x2c autosomal recessive(ClinVar)	Epidermolysis bullosa	C0014527	EBD1|EBDCT|EBR1	2214	C9JBL3:Q02388	NP_000085.1
Core matrisome	Collagens	COL7A1	collagen, type VII, alpha 1	2214	p.ARG2063TRP	Recessive dystrophic epidermolysis bullosa(ClinVar)	Epidermolysis bullosa dystrophica	C0079294	EBD1|EBDCT|EBR1	2214	C9JBL3:Q02388	NP_000085.1
Core matrisome	Collagens	COL7A1	collagen, type VII, alpha 1	2214	p.ARG2069CYS	Epidermolysis bullosa dystrophica inversa\x2c autosomal recessive(ClinVar)	Epidermolysis bullosa dystrophica	C0079294	EBD1|EBDCT|EBR1	2214	C9JBL3:Q02388	NP_000085.1
Core matrisome	Collagens	COL7A1	collagen, type VII, alpha 1	2214	p.ARG236TER	Epidermolysis bullosa dystrophica inversa\x2c autosomal recessive|Recessive dystrophic epidermolysis bullosa(ClinVar)	Epidermolysis bullosa	C0014527	EBD1|EBDCT|EBR1	2214	C9JBL3:Q02388	NP_000085.1
Core matrisome	Collagens	COL7A1	collagen, type VII, alpha 1	2214	p.ARG2471TER	Recessive dystrophic epidermolysis bullosa(ClinVar)	Epidermolysis bullosa dystrophica	C0079294	EBD1|EBDCT|EBR1	2214	C9JBL3:Q02388	NP_000085.1
Core matrisome	Collagens	COL7A1	collagen, type VII, alpha 1	2214	p.GLY1347ARG	Epidermolysis bullosa dystrophica\x2c autosomal recessive\x2c localisata variant(ClinVar)	Epidermolysis bullosa dystrophica	C0079294	EBD1|EBDCT|EBR1	2214	C9JBL3:Q02388	NP_000085.1
Core matrisome	Collagens	COL7A1	collagen, type VII, alpha 1	2214	p.GLY1595ARG	Recessive dystrophic epidermolysis bullosa|Nail disorder\x2c nonsyndromic congenital\x2c 8(ClinVar)	Epidermolysis bullosa dystrophica	C0079294	EBD1|EBDCT|EBR1	2214	C9JBL3:Q02388	NP_000085.1
Core matrisome	Collagens	COL7A1	collagen, type VII, alpha 1	2214	p.GLY1815ARG	Recessive dystrophic epidermolysis bullosa|Nail disorder\x2c nonsyndromic congenital\x2c 8(ClinVar)	Epidermolysis bullosa dystrophica	C0079294	EBD1|EBDCT|EBR1	2214	C9JBL3:Q02388	NP_000085.1
Core matrisome	Collagens	COL7A1	collagen, type VII, alpha 1	2214	p.GLY2003ARG	Dominant dystrophic epidermolysis bullosa with absence of skin(ClinVar)	Dominant dystrophic epidermolysis bullosa with absence of skin	C0268371	EBD1|EBDCT|EBR1	2214	C9JBL3:Q02388	NP_000085.1
Core matrisome	Collagens	COL7A1	collagen, type VII, alpha 1	2214	p.GLY2006ASP	Generalized dominant dystrophic epidermolysis bullosa(ClinVar)	Epidermolysis bullosa dystrophica	C0079294	EBD1|EBDCT|EBR1	2214	C9JBL3:Q02388	NP_000085.1
Core matrisome	Collagens	COL7A1	collagen, type VII, alpha 1	2214	p.GLY2015GLU	Generalized dominant dystrophic epidermolysis bullosa(ClinVar)	Epidermolysis bullosa dystrophica	C0079294	EBD1|EBDCT|EBR1	2214	C9JBL3:Q02388	NP_000085.1
Core matrisome	Collagens	COL7A1	collagen, type VII, alpha 1	2214	p.GLY2031SER	Recessive dystrophic epidermolysis bullosa(ClinVar)	Epidermolysis bullosa dystrophica	C0079294	EBD1|EBDCT|EBR1	2214	C9JBL3:Q02388	NP_000085.1
Core matrisome	Collagens	COL7A1	collagen, type VII, alpha 1	2214	p.GLY2034ARG	Generalized dominant dystrophic epidermolysis bullosa(ClinVar)	Epidermolysis bullosa dystrophica	C0079294	EBD1|EBDCT|EBR1	2214	C9JBL3:Q02388	NP_000085.1
Core matrisome	Collagens	COL7A1	collagen, type VII, alpha 1	2214	p.GLY2037GLU	Generalized dominant dystrophic epidermolysis bullosa(ClinVar)	Epidermolysis bullosa dystrophica	C0079294	EBD1|EBDCT|EBR1	2214	C9JBL3:Q02388	NP_000085.1
Core matrisome	Collagens	COL7A1	collagen, type VII, alpha 1	2214	p.GLY2040SER	Generalized dominant dystrophic epidermolysis bullosa(ClinVar)	Epidermolysis bullosa	C0014527	EBD1|EBDCT|EBR1	2214	C9JBL3:Q02388	NP_000085.1
Core matrisome	Collagens	COL7A1	collagen, type VII, alpha 1	2214	p.GLY2043ARG	Generalized dominant dystrophic epidermolysis bullosa(ClinVar)	Epidermolysis bullosa dystrophica	C0079294	EBD1|EBDCT|EBR1	2214	C9JBL3:Q02388	NP_000085.1
Core matrisome	Collagens	COL7A1	collagen, type VII, alpha 1	2214	p.GLY2073VAL	Epidermolysis bullosa pruriginosa\x2c autosomal dominant(ClinVar)	Epidermolysis bullosa dystrophica	C0079294	EBD1|EBDCT|EBR1	2214	C9JBL3:Q02388	NP_000085.1
Core matrisome	Collagens	COL7A1	collagen, type VII, alpha 1	2214	p.GLY2076ASP	Generalized dominant dystrophic epidermolysis bullosa(ClinVar)	Epidermolysis bullosa dystrophica	C0079294	EBD1|EBDCT|EBR1	2214	C9JBL3:Q02388	NP_000085.1
Core matrisome	Collagens	COL7A1	collagen, type VII, alpha 1	2214	p.GLY2242ARG	Epidermolysis bullosa pruriginosa\x2c autosomal dominant(ClinVar)	Epidermolysis bullosa dystrophica	C0079294	EBD1|EBDCT|EBR1	2214	C9JBL3:Q02388	NP_000085.1
Core matrisome	Collagens	COL7A1	collagen, type VII, alpha 1	2214	p.GLY2251GLU	Transient bullous dermolysis of the newborn|Nail disorder\x2c nonsyndromic congenital\x2c 8|Epidermolysis bullosa pruriginosa\x2c autosomal dominant(ClinVar)	EPIDERMOLYSIS BULLOSA PRURIGINOSA, AUTOSOMAL DOMINANT	C2675780	EBD1|EBDCT|EBR1	2214	C9JBL3:Q02388	NP_000085.1
Core matrisome	Collagens	COL7A1	collagen, type VII, alpha 1	2214	p.GLY2287ARG	Recessive dystrophic epidermolysis bullosa|Nail disorder\x2c nonsyndromic congenital\x2c 8(ClinVar)	Epidermolysis bullosa dystrophica	C0079294	EBD1|EBDCT|EBR1	2214	C9JBL3:Q02388	NP_000085.1
Core matrisome	Collagens	COL7A1	collagen, type VII, alpha 1	2214	p.GLY2623CYS	Pretibial epidermolysis bullosa(ClinVar)	Epidermolysis bullosa	C0014527	EBD1|EBDCT|EBR1	2214	C9JBL3:Q02388	NP_000085.1
Core matrisome	Collagens	COL7A1	collagen, type VII, alpha 1	2214	p.GLY2653ARG	Recessive dystrophic epidermolysis bullosa(ClinVar)	Epidermolysis bullosa dystrophica	C0079294	EBD1|EBDCT|EBR1	2214	C9JBL3:Q02388	NP_000085.1
Core matrisome	Collagens	COL7A1	collagen, type VII, alpha 1	2214	p.GLY2749TER	Recessive dystrophic epidermolysis bullosa(ClinVar)	Recessive dystrophic epidermolysis bullosa	C0079474	EBD1|EBDCT|EBR1	2214	C9JBL3:Q02388	NP_000085.1
Core matrisome	Collagens	COL7A1	collagen, type VII, alpha 1	2214	p.LYS142ARG	Epidermolysis bullosa dystrophica inversa\x2c autosomal recessive(ClinVar)	Epidermolysis bullosa dystrophica autosomal recessive	C0079474	EBD1|EBDCT|EBR1	2214	C9JBL3:Q02388	NP_000085.1
Core matrisome	Collagens	COL7A1	collagen, type VII, alpha 1	2214	p.MET2798LYS	Recessive dystrophic epidermolysis bullosa(ClinVar)	Epidermolysis bullosa	C0014527	EBD1|EBDCT|EBR1	2214	C9JBL3:Q02388	NP_000085.1
Core matrisome	Collagens	COL7A1	collagen, type VII, alpha 1	2214	p.PRO1699LEU	Epidermolysis bullosa\x2c pretibial\x2c autosomal recessive(ClinVar)	Epidermolysis bullosa dystrophica	C0079294	EBD1|EBDCT|EBR1	2214	C9JBL3:Q02388	NP_000085.1
Core matrisome	Collagens	COL7A1	collagen, type VII, alpha 1	2214	p.TYR311TYR	Recessive dystrophic epidermolysis bullosa(ClinVar)	Recessive dystrophic epidermolysis bullosa	C0079474	EBD1|EBDCT|EBR1	2214	C9JBL3:Q02388	NP_000085.1
Core matrisome	Collagens	COL8A2	collagen, type VIII, alpha 2	2216	p.GLN455LYS	Corneal dystrophy Fuchs endothelial 1|Corneal dystrophy\x2c polymorphous posterior\x2c 2(ClinVar)	Corneal dystrophy Fuchs endothelial 1	C1850959	FECD|FECD1|FLJ00201|MGC116970|MGC116972|PPCD|PPCD2	2216	E9PP49:P25067	NP_005193.1:XP_005270535.1:XP_005270536.1
Core matrisome	Collagens	COL8A2	collagen, type VIII, alpha 2	2216	p.LEU450TRP	Corneal dystrophy Fuchs endothelial 1|Corneal dystrophy\x2c polymorphous posterior\x2c 2(ClinVar)	Corneal dystrophy Fuchs endothelial 1	C1850959	FECD|FECD1|FLJ00201|MGC116970|MGC116972|PPCD|PPCD2	2216	E9PP49:P25067	NP_005193.1:XP_005270535.1:XP_005270536.1
Core matrisome	Collagens	COL9A1	collagen, type IX, alpha 1	2217	p.ARG295TER	Stickler syndrome\x2c type 4(ClinVar)	Stickler syndrome, type IV	C3279941	DJ149L1.1.2|EDM6|FLJ40263|MED	2217	A6NEQ6:P20849	NP_001842.3:NP_511040.2
Core matrisome	Collagens	COL9A3	collagen, type IX, alpha 3	2219	p.ARG103TRP	Intervertebral disc disease\x2c susceptibility to(ClinVar)	INTERVERTEBRAL DISC DISEASE, SUSCEPTIBILITY TO	C4015963	DJ885L7.4.1|EDM3|FLJ90759|IDD|MED	2219	Q14050:Q4VXW1	NP_001844.3
Core matrisome	ECM Glycoproteins	ADIPOQ	adiponectin, C1Q and collagen domain containing	13633	p.ARG112CYS	Hypoadiponectinemia(ClinVar)	ADIPONECTIN DEFICIENCY	C2675518	ACDC|ACRP30|ADIPQTL1|ADPN|APM-1|APM1|GBP28|adipone	13633	Q15848	NP_001171271.1:NP_004788.1
Core matrisome	ECM Glycoproteins	AMELX	amelogenin (amelogenesis imperfecta 1, X-linked)	461	p.GLU191TER	AMELOGENESIS IMPERFECTA\x2c TYPE IE(ClinVar)	Amelogenesis imperfecta	C0002452	AIH1|ALGN|AMG|AMGL|AMGX	461	Q99217	NP_001133.1:NP_872621.1:NP_872622.1
Core matrisome	ECM Glycoproteins	AMELX	amelogenin (amelogenesis imperfecta 1, X-linked)	461	p.MET1THR	AMELOGENESIS IMPERFECTA\x2c TYPE IE(ClinVar)	Amelogenesis imperfecta	C0002452	AIH1|ALGN|AMG|AMGL|AMGX	461	Q99217	NP_001133.1:NP_872621.1:NP_872622.1
Core matrisome	ECM Glycoproteins	AMELX	amelogenin (amelogenesis imperfecta 1, X-linked)	461	p.PRO70THR	AMELOGENESIS IMPERFECTA\x2c TYPE IE(ClinVar)	Amelogenesis imperfecta	C0002452	AIH1|ALGN|AMG|AMGL|AMGX	461	Q99217	NP_001133.1:NP_872621.1:NP_872622.1
Core matrisome	ECM Glycoproteins	AMELX	amelogenin (amelogenesis imperfecta 1, X-linked)	461	p.THR51ILE	AMELOGENESIS IMPERFECTA\x2c TYPE IE(ClinVar)	Amelogenesis imperfecta	C0002452	AIH1|ALGN|AMG|AMGL|AMGX	461	Q99217	NP_001133.1:NP_872621.1:NP_872622.1
Core matrisome	ECM Glycoproteins	AMELX	amelogenin (amelogenesis imperfecta 1, X-linked)	461	p.TRP4SER	AMELOGENESIS IMPERFECTA\x2c TYPE IE(ClinVar)	Amelogenesis imperfecta	C0002452	AIH1|ALGN|AMG|AMGL|AMGX	461	Q99217	NP_001133.1:NP_872621.1:NP_872622.1
Core matrisome	ECM Glycoproteins	CILP	cartilage intermediate layer protein, nucleotide pyrophosphohydrolase	1980	p.ILE395THR	Lumbar disc disease\x2c susceptibility to(ClinVar)	Lumbar disc disease	C0221775	CILP-1|HsT18872	1980	O75339	NP_003604.3
Core matrisome	ECM Glycoproteins	COCH	coagulation factor C homolog, cochlin (Limulus polyphemus)	2180	p.ALA119THR	Deafness\x2c autosomal dominant 9(ClinVar)	DFNA9	C1832425	COCH-5B2|COCH5B2|DFNA9	2180	E7EN67:G3V4C4:G3V5G6:G3V5V4:G3V5X3:H0YJJ0:H0YJW4:O43405:Q96IU6	NP_001128530.1:NP_004077.1:XP_006720136.1
Core matrisome	ECM Glycoproteins	COCH	coagulation factor C homolog, cochlin (Limulus polyphemus)	2180	p.CYS542TYR	Deafness\x2c autosomal dominant 9,Deafness\x2c autosomal dominant 9(ClinVar)	DEAFNESS, AUTOSOMAL DOMINANT 9	C1832425	COCH-5B2|COCH5B2|DFNA9	2180	E7EN67:G3V4C4:G3V5G6:G3V5V4:G3V5X3:H0YJJ0:H0YJW4:O43405:Q96IU6	NP_001128530.1:NP_004077.1:XP_006720136.1
Core matrisome	ECM Glycoproteins	COCH	coagulation factor C homolog, cochlin (Limulus polyphemus)	2180	p.GLY88GLU	Deafness\x2c autosomal dominant 9(ClinVar)	DFNA9	C1832425	COCH-5B2|COCH5B2|DFNA9	2180	E7EN67:G3V4C4:G3V5G6:G3V5V4:G3V5X3:H0YJJ0:H0YJW4:O43405:Q96IU6	NP_001128530.1:NP_004077.1:XP_006720136.1
Core matrisome	ECM Glycoproteins	COCH	coagulation factor C homolog, cochlin (Limulus polyphemus)	2180	p.ILE109ASN	Deafness\x2c autosomal dominant 9(ClinVar)	DFNA9	C1832425	COCH-5B2|COCH5B2|DFNA9	2180	E7EN67:G3V4C4:G3V5G6:G3V5V4:G3V5X3:H0YJJ0:H0YJW4:O43405:Q96IU6	NP_001128530.1:NP_004077.1:XP_006720136.1
Core matrisome	ECM Glycoproteins	COCH	coagulation factor C homolog, cochlin (Limulus polyphemus)	2180	p.MET512THR	Deafness\x2c autosomal dominant 9(ClinVar)	DEAFNESS, AUTOSOMAL DOMINANT 9	C1832425	COCH-5B2|COCH5B2|DFNA9	2180	E7EN67:G3V4C4:G3V5G6:G3V5V4:G3V5X3:H0YJJ0:H0YJW4:O43405:Q96IU6	NP_001128530.1:NP_004077.1:XP_006720136.1
Core matrisome	ECM Glycoproteins	COCH	coagulation factor C homolog, cochlin (Limulus polyphemus)	2180	p.PRO51SER	Deafness\x2c autosomal dominant 9(ClinVar)	DFNA9	C1832425	COCH-5B2|COCH5B2|DFNA9	2180	E7EN67:G3V4C4:G3V5G6:G3V5V4:G3V5X3:H0YJJ0:H0YJW4:O43405:Q96IU6	NP_001128530.1:NP_004077.1:XP_006720136.1
Core matrisome	ECM Glycoproteins	COCH	coagulation factor C homolog, cochlin (Limulus polyphemus)	2180	p.TRP117ARG	Deafness\x2c autosomal dominant 9(ClinVar)	DFNA9	C1832425	COCH-5B2|COCH5B2|DFNA9	2180	E7EN67:G3V4C4:G3V5G6:G3V5V4:G3V5X3:H0YJJ0:H0YJW4:O43405:Q96IU6	NP_001128530.1:NP_004077.1:XP_006720136.1
Core matrisome	ECM Glycoproteins	COCH	coagulation factor C homolog, cochlin (Limulus polyphemus)	2180	p.VAL66GLY	Deafness\x2c autosomal dominant 9(ClinVar)	DFNA9	C1832425	COCH-5B2|COCH5B2|DFNA9	2180	E7EN67:G3V4C4:G3V5G6:G3V5V4:G3V5X3:H0YJJ0:H0YJW4:O43405:Q96IU6	NP_001128530.1:NP_004077.1:XP_006720136.1
Core matrisome	ECM Glycoproteins	COMP	cartilage oligomeric matrix protein	2227	p.ARG718TRP	Multiple epiphyseal dysplasia 1(ClinVar)	EPIPHYSEAL DYSPLASIA, MULTIPLE, 1	C1838280	EDM1|EPD1|MED|MGC131819|MGC149768|PSACH|THBS5	2227	B4DKJ3:G3XAP6:P49747	NP_000086.2
Core matrisome	ECM Glycoproteins	COMP	cartilage oligomeric matrix protein	2227	p.ASN453SER	Epiphyseal dysplasia\x2c multiple\x2c 1\x2c severe(ClinVar)	EPIPHYSEAL DYSPLASIA, MULTIPLE, 1, SEVERE	C4016660	EDM1|EPD1|MED|MGC131819|MGC149768|PSACH|THBS5	2227	B4DKJ3:G3XAP6:P49747	NP_000086.2
Core matrisome	ECM Glycoproteins	COMP	cartilage oligomeric matrix protein	2227	p.ASN523LYS	Epiphyseal dysplasia\x2c multiple\x2c 1\x2c mild(ClinVar)	Multiple epiphyseal dysplasia	C0026760	EDM1|EPD1|MED|MGC131819|MGC149768|PSACH|THBS5	2227	B4DKJ3:G3XAP6:P49747	NP_000086.2
Core matrisome	ECM Glycoproteins	COMP	cartilage oligomeric matrix protein	2227	p.ASP342TYR	Epiphyseal dysplasia\x2c multiple\x2c 1\x2c severe(ClinVar)	EPIPHYSEAL DYSPLASIA, MULTIPLE, 1, SEVERE	C4016660	EDM1|EPD1|MED|MGC131819|MGC149768|PSACH|THBS5	2227	B4DKJ3:G3XAP6:P49747	NP_000086.2
Core matrisome	ECM Glycoproteins	COMP	cartilage oligomeric matrix protein	2227	p.ASP472TYR	Pseudoachondroplastic spondyloepiphyseal dysplasia syndrome(ClinVar)	PSEUDOACHONDROPLASIA	C0410538	EDM1|EPD1|MED|MGC131819|MGC149768|PSACH|THBS5	2227	B4DKJ3:G3XAP6:P49747	NP_000086.2
Core matrisome	ECM Glycoproteins	COMP	cartilage oligomeric matrix protein	2227	p.ASP473GLY	Pseudoachondroaplasia(ClinVar)	Pseudoachondroplasia	C0410538	EDM1|EPD1|MED|MGC131819|MGC149768|PSACH|THBS5	2227	B4DKJ3:G3XAP6:P49747	NP_000086.2
Core matrisome	ECM Glycoproteins	COMP	cartilage oligomeric matrix protein	2227	p.CYS328ARG	Pseudoachondroplastic spondyloepiphyseal dysplasia syndrome(ClinVar)	PSEUDOACHONDROPLASIA	C0410538	EDM1|EPD1|MED|MGC131819|MGC149768|PSACH|THBS5	2227	B4DKJ3:G3XAP6:P49747	NP_000086.2
Core matrisome	ECM Glycoproteins	COMP	cartilage oligomeric matrix protein	2227	p.CYS348ARG	Pseudoachondroplastic spondyloepiphyseal dysplasia syndrome(ClinVar)	PSEUDOACHONDROPLASIA	C0410538	EDM1|EPD1|MED|MGC131819|MGC149768|PSACH|THBS5	2227	B4DKJ3:G3XAP6:P49747	NP_000086.2
Core matrisome	ECM Glycoproteins	COMP	cartilage oligomeric matrix protein	2227	p.CYS468TYR	Pseudoachondroplastic spondyloepiphyseal dysplasia syndrome(ClinVar)	PSEUDOACHONDROPLASIA	C0410538	EDM1|EPD1|MED|MGC131819|MGC149768|PSACH|THBS5	2227	B4DKJ3:G3XAP6:P49747	NP_000086.2
Core matrisome	ECM Glycoproteins	COMP	cartilage oligomeric matrix protein	2227	p.GLY719ASP	Pseudoachondroplasia\x2c severe(ClinVar)	Pseudoachondroplasia	C0410538	EDM1|EPD1|MED|MGC131819|MGC149768|PSACH|THBS5	2227	B4DKJ3:G3XAP6:P49747	NP_000086.2
Core matrisome	ECM Glycoproteins	CRELD1	cysteine-rich with EGF-like domains 1	14630	p.ARG107HIS	Atrioventricular septal defect\x2c partial\x2c with heterotaxy syndrome(ClinVar)	Atrioventricular septal defect, partial, with heterotaxy syndrome	C1853509	AVSD2|CIRRIN|DKFZp566D213	14630	F8WBY3:H7C2L3:Q96HD1	NP_001026887.1:NP_001070883.1:NP_056328.2:XP_006713391.1
Core matrisome	ECM Glycoproteins	CRELD1	cysteine-rich with EGF-like domains 1	14630	p.ARG329CYS	Atrioventricular septal defect 2(ClinVar)	ATRIOVENTRICULAR SEPTAL DEFECT, SUSCEPTIBILITY TO, 2	C1853508	AVSD2|CIRRIN|DKFZp566D213	14630	F8WBY3:H7C2L3:Q96HD1	NP_001026887.1:NP_001070883.1:NP_056328.2:XP_006713391.1
Core matrisome	ECM Glycoproteins	CRELD1	cysteine-rich with EGF-like domains 1	14630	p.GLU414LYS	Atrioventricular septal defect 2(ClinVar)	ATRIOVENTRICULAR SEPTAL DEFECT, SUSCEPTIBILITY TO, 2	C1853508	AVSD2|CIRRIN|DKFZp566D213	14630	F8WBY3:H7C2L3:Q96HD1	NP_001026887.1:NP_001070883.1:NP_056328.2:XP_006713391.1
Core matrisome	ECM Glycoproteins	CRELD1	cysteine-rich with EGF-like domains 1	14630	p.PRO162ALA	Atrioventricular septal defect 2(ClinVar)	ATRIOVENTRICULAR SEPTAL DEFECT, SUSCEPTIBILITY TO, 2	C1853508	AVSD2|CIRRIN|DKFZp566D213	14630	F8WBY3:H7C2L3:Q96HD1	NP_001026887.1:NP_001070883.1:NP_056328.2:XP_006713391.1
Core matrisome	ECM Glycoproteins	CRELD1	cysteine-rich with EGF-like domains 1	14630	p.THR311ILE	Atrioventricular septal defect 2(ClinVar)	ATRIOVENTRICULAR SEPTAL DEFECT, SUSCEPTIBILITY TO, 2	C1853508	AVSD2|CIRRIN|DKFZp566D213	14630	F8WBY3:H7C2L3:Q96HD1	NP_001026887.1:NP_001070883.1:NP_056328.2:XP_006713391.1
Core matrisome	ECM Glycoproteins	DMP1	dentin matrix acidic phosphoprotein 1	2932	p.MET1VAL	Autosomal recessive hypophosphatemic vitamin D refractory rickets(ClinVar)	Autosomal recessive hypophosphatemic vitamin D refractory rickets	C0342643	ARHP|ARHR|DMP-1	2932	Q13316	NP_001073380.1:NP_004398.1
Core matrisome	ECM Glycoproteins	DSPP	dentin sialophosphoprotein	3054	p.ALA15VAL	Dentinogenesis imperfecta - Shield's type II(ClinVar)	Dentinogenesis imperfecta - Shield's type II	C2973527	DFNA39|DGI1|DMP3|DPP|DSP|DTDP2	3054	Q9NZW4	NP_055023.2
Core matrisome	ECM Glycoproteins	DSPP	dentin sialophosphoprotein	3054	p.ARG68TRP	Dentinogenesis imperfecta - Shield's type II(ClinVar)	Dentinogenesis imperfecta - Shield's type II	C2973527	DFNA39|DGI1|DMP3|DPP|DSP|DTDP2	3054	Q9NZW4	NP_055023.2
Core matrisome	ECM Glycoproteins	DSPP	dentin sialophosphoprotein	3054	p.GLN45TER	Dentinogenesis imperfecta - Shield's type II(ClinVar)	Dentinogenesis imperfecta - Shield's type II	C2973527	DFNA39|DGI1|DMP3|DPP|DSP|DTDP2	3054	Q9NZW4	NP_055023.2
Core matrisome	ECM Glycoproteins	DSPP	dentin sialophosphoprotein	3054	p.PRO17THR	Deafness\x2c autosomal dominant nonsyndromic sensorineural 39\x2c with dentinogenesis imperfecta 1(ClinVar)	Deafness, autosomal dominant nonsyndromic sensorineural 39, with dentinogenesis imperfecta 1	C4016014	DFNA39|DGI1|DMP3|DPP|DSP|DTDP2	3054	Q9NZW4	NP_055023.2
Core matrisome	ECM Glycoproteins	DSPP	dentin sialophosphoprotein	3054	p.TYR6ASP	Denticles(ClinVar)	Denticles	C1527284	DFNA39|DGI1|DMP3|DPP|DSP|DTDP2	3054	Q9NZW4	NP_055023.2
Core matrisome	ECM Glycoproteins	DSPP	dentin sialophosphoprotein	3054	p.VAL18PHE	Deafness\x2c autosomal dominant nonsyndromic sensorineural 39\x2c with dentinogenesis imperfecta 1|Dentinogenesis imperfecta - Shield's type II|Dentinogenesis imperfecta - Shield's type III(ClinVar)	Deafness, autosomal dominant nonsyndromic sensorineural 39, with dentinogenesis imperfecta 1	C4016014	DFNA39|DGI1|DMP3|DPP|DSP|DTDP2	3054	Q9NZW4	NP_055023.2
Core matrisome	ECM Glycoproteins	ECM1	extracellular matrix protein 1	3153	p.ARG53TER	Lipid proteinosis(ClinVar)	Lipid proteinosis	C0023795	-	3153	Q16610	NP_001189787.1:NP_004416.2:NP_073155.2
Core matrisome	ECM Glycoproteins	ECM1	extracellular matrix protein 1	3153	p.GLN346TER	Lipid proteinosis(ClinVar)	Lipid proteinosis	C0023795	-	3153	Q16610	NP_001189787.1:NP_004416.2:NP_073155.2
Core matrisome	ECM Glycoproteins	ECM1	extracellular matrix protein 1	3153	p.PHE167ILE	Lipid proteinosis(ClinVar)	Lipid proteinosis	C0023795	-	3153	Q16610	NP_001189787.1:NP_004416.2:NP_073155.2
Core matrisome	ECM Glycoproteins	EFEMP1	EGF-containing fibulin-like extracellular matrix protein 1	3218	p.ARG345TRP	Malattia leventinese|Doyne honeycomb retinal dystrophy(ClinVar)	DHRD	C1832174;C3810646	DHRD|DRAD|FBLN3|FBNL|FLJ35535|MGC111353|MLVT|MTLV|	3218	C9J4H7:C9J4J8:C9J8S9:C9JPZ9:C9JQX7:C9JUM4:Q12805:Q580Q6	NP_001034437.1:NP_001034438.1
Core matrisome	ECM Glycoproteins	EFEMP2	EGF-containing fibulin-like extracellular matrix protein 2	3219	p.ALA397THR	Autosomal recessive cutis laxa type IA(ClinVar)	Autosomal recessive cutis laxa type IA	C0268351	FBLN4|MBP1|UPH1	3219	E9PI47:E9PKA3:E9PNB8:E9PRQ8:E9PRU1:E9PSC1:H0YCB5:H0YCR9:H0YET5:H0YEU0:O95967	NP_058634.4
Core matrisome	ECM Glycoproteins	EFEMP2	EGF-containing fibulin-like extracellular matrix protein 2	3219	p.ARG279CYS	Autosomal recessive cutis laxa type 1B|Autosomal recessive cutis laxa type IA(ClinVar)	Autosomal recessive cutis laxa type 1B	C4016894	FBLN4|MBP1|UPH1	3219	E9PI47:E9PKA3:E9PNB8:E9PRQ8:E9PRU1:E9PSC1:H0YCB5:H0YCR9:H0YET5:H0YEU0:O95967	NP_058634.4
Core matrisome	ECM Glycoproteins	EFEMP2	EGF-containing fibulin-like extracellular matrix protein 2	3219	p.ASP203ALA	Autosomal recessive cutis laxa type IA(ClinVar)	Autosomal recessive cutis laxa type IA	C0268351	FBLN4|MBP1|UPH1	3219	E9PI47:E9PKA3:E9PNB8:E9PRQ8:E9PRU1:E9PSC1:H0YCB5:H0YCR9:H0YET5:H0YEU0:O95967	NP_058634.4
Core matrisome	ECM Glycoproteins	EFEMP2	EGF-containing fibulin-like extracellular matrix protein 2	3219	p.CYS267TYR	Autosomal recessive cutis laxa type 1B|Autosomal recessive cutis laxa type IA(ClinVar)	Autosomal recessive cutis laxa type 1B	C4016894	FBLN4|MBP1|UPH1	3219	E9PI47:E9PKA3:E9PNB8:E9PRQ8:E9PRU1:E9PSC1:H0YCB5:H0YCR9:H0YET5:H0YEU0:O95967	NP_058634.4
Core matrisome	ECM Glycoproteins	EFEMP2	EGF-containing fibulin-like extracellular matrix protein 2	3219	p.GLU126LYS	Autosomal recessive cutis laxa type IA(ClinVar)	Autosomal recessive cutis laxa type IA	C0268351	FBLN4|MBP1|UPH1	3219	E9PI47:E9PKA3:E9PNB8:E9PRQ8:E9PRU1:E9PSC1:H0YCB5:H0YCR9:H0YET5:H0YEU0:O95967	NP_058634.4
Core matrisome	ECM Glycoproteins	EFEMP2	EGF-containing fibulin-like extracellular matrix protein 2	3219	p.GLU126VAL	Autosomal recessive cutis laxa type IA(ClinVar)	Autosomal recessive cutis laxa type IA	C0268351	FBLN4|MBP1|UPH1	3219	E9PI47:E9PKA3:E9PNB8:E9PRQ8:E9PRU1:E9PSC1:H0YCB5:H0YCR9:H0YET5:H0YEU0:O95967	NP_058634.4
Core matrisome	ECM Glycoproteins	EFEMP2	EGF-containing fibulin-like extracellular matrix protein 2	3219	p.GLU57LYS	Autosomal recessive cutis laxa type 1B|Autosomal recessive cutis laxa type IA(ClinVar)	Autosomal recessive cutis laxa type 1B	C4016894	FBLN4|MBP1|UPH1	3219	E9PI47:E9PKA3:E9PNB8:E9PRQ8:E9PRU1:E9PSC1:H0YCB5:H0YCR9:H0YET5:H0YEU0:O95967	NP_058634.4
Core matrisome	ECM Glycoproteins	ELN	elastin	3327	p.ARG527TER	Supravalvar aortic stenosis(ClinVar)	Supravalvar aortic stenosis	C0003499;C1305147	FLJ38671|FLJ43523|SVAS|WBS|WS	3327	E7EN51:E7EN65:E7ENM0:E7ENW7:E7EP82:E7EQH8:E7ETP7:E7EWS8:E9PGX4:F8WAH6:G3V0G6:G5E950:H7C3K0:P15502	NP_000492.2:NP_001075221.1:NP_001075222.1:NP_001075223.1:NP_001075224.1:NP_001265844.1:NP_001265845.1:NP_001265841.1:NP_001265842.1:NP_001265843.1:NP_001265846.1
Core matrisome	ECM Glycoproteins	ELN	elastin	3327	p.CYS682TYR	Williams syndrome(ClinVar)	Williams syndrome	C0175702	FLJ38671|FLJ43523|SVAS|WBS|WS	3327	E7EN51:E7EN65:E7ENM0:E7ENW7:E7EP82:E7EQH8:E7ETP7:E7EWS8:E9PGX4:F8WAH6:G3V0G6:G5E950:H7C3K0:P15502	NP_000492.2:NP_001075221.1:NP_001075222.1:NP_001075223.1:NP_001075224.1:NP_001265844.1:NP_001265845.1:NP_001265841.1:NP_001265842.1:NP_001265843.1:NP_001265846.1
Core matrisome	ECM Glycoproteins	ELN	elastin	3327	p.GLN442TER	Supravalvar aortic stenosis(ClinVar)	Supravalvar aortic stenosis	C0003499;C1305147	FLJ38671|FLJ43523|SVAS|WBS|WS	3327	E7EN51:E7EN65:E7ENM0:E7ENW7:E7EP82:E7EQH8:E7ETP7:E7EWS8:E9PGX4:F8WAH6:G3V0G6:G5E950:H7C3K0:P15502	NP_000492.2:NP_001075221.1:NP_001075222.1:NP_001075223.1:NP_001075224.1:NP_001265844.1:NP_001265845.1:NP_001265841.1:NP_001265842.1:NP_001265843.1:NP_001265846.1
Core matrisome	ECM Glycoproteins	ELN	elastin	3327	p.LYS176TER	Supravalvar aortic stenosis(ClinVar)	Supravalvar aortic stenosis	C0003499;C1305147	FLJ38671|FLJ43523|SVAS|WBS|WS	3327	E7EN51:E7EN65:E7ENM0:E7ENW7:E7EP82:E7EQH8:E7ETP7:E7EWS8:E9PGX4:F8WAH6:G3V0G6:G5E950:H7C3K0:P15502	NP_000492.2:NP_001075221.1:NP_001075222.1:NP_001075223.1:NP_001075224.1:NP_001265844.1:NP_001265845.1:NP_001265841.1:NP_001265842.1:NP_001265843.1:NP_001265846.1
Core matrisome	ECM Glycoproteins	ELN	elastin	3327	p.TYR150TER	Supravalvar aortic stenosis(ClinVar)	Supravalvar aortic stenosis	C0003499;C1305147	FLJ38671|FLJ43523|SVAS|WBS|WS	3327	E7EN51:E7EN65:E7ENM0:E7ENW7:E7EP82:E7EQH8:E7ETP7:E7EWS8:E9PGX4:F8WAH6:G3V0G6:G5E950:H7C3K0:P15502	NP_000492.2:NP_001075221.1:NP_001075222.1:NP_001075223.1:NP_001075224.1:NP_001265844.1:NP_001265845.1:NP_001265841.1:NP_001265842.1:NP_001265843.1:NP_001265846.1
Core matrisome	ECM Glycoproteins	EYS	eyes shut homolog (Drosophila)	21555	p.GLU1953TER	Retinitis Pigmentosa 25(ClinVar)	Retinitis pigmentosa	C0035334	C6orf178|C6orf179|C6orf180|EGFL10|EGFL11|KIAA0663|	21555	F8WDD3:H0Y3Q4:Q5T1H1	NP_001136272.1:NP_001136273.1:NP_938024.1
Core matrisome	ECM Glycoproteins	EYS	eyes shut homolog (Drosophila)	21555	p.TYR3135TER	Retinitis Pigmentosa 25(ClinVar)	Retinitis pigmentosa	C0035334	C6orf178|C6orf179|C6orf180|EGFL10|EGFL11|KIAA0663|	21555	F8WDD3:H0Y3Q4:Q5T1H1	NP_001136272.1:NP_001136273.1:NP_938024.1
Core matrisome	ECM Glycoproteins	FBLN5	fibulin 5	3602	p.ALA363THR	Age-related macular degeneration 3(ClinVar)	Age-related macular degeneration	C0242383;C3495438	ARMD3|DANCE|EVEC|FIBL-5|FLJ90059|UP50	3602	G3V2P8:G3V329:G3V3Y2:G3V4U0:G3XA98:H0YJ31:Q9UBX5	NP_006320.2
Core matrisome	ECM Glycoproteins	FBLN5	fibulin 5	3602	p.ARG351TRP	Age-related macular degeneration 3(ClinVar)	Age-related macular degeneration	C0242383;C3495438	ARMD3|DANCE|EVEC|FIBL-5|FLJ90059|UP50	3602	G3V2P8:G3V329:G3V3Y2:G3V4U0:G3XA98:H0YJ31:Q9UBX5	NP_006320.2
Core matrisome	ECM Glycoproteins	FBLN5	fibulin 5	3602	p.ARG71GLN	Age-related macular degeneration 3(ClinVar)	Age-related macular degeneration	C0242383;C3495438	ARMD3|DANCE|EVEC|FIBL-5|FLJ90059|UP50	3602	G3V2P8:G3V329:G3V3Y2:G3V4U0:G3XA98:H0YJ31:Q9UBX5	NP_006320.2
Core matrisome	ECM Glycoproteins	FBLN5	fibulin 5	3602	p.CYS217ARG	Autosomal recessive cutis laxa type IA(ClinVar)	Autosomal recessive cutis laxa type IA	C0268351	ARMD3|DANCE|EVEC|FIBL-5|FLJ90059|UP50	3602	G3V2P8:G3V329:G3V3Y2:G3V4U0:G3XA98:H0YJ31:Q9UBX5	NP_006320.2
Core matrisome	ECM Glycoproteins	FBLN5	fibulin 5	3602	p.GLU391TER	Autosomal recessive cutis laxa type IA(ClinVar)	Autosomal recessive cutis laxa type IA	C0268351	ARMD3|DANCE|EVEC|FIBL-5|FLJ90059|UP50	3602	G3V2P8:G3V329:G3V3Y2:G3V4U0:G3XA98:H0YJ31:Q9UBX5	NP_006320.2
Core matrisome	ECM Glycoproteins	FBLN5	fibulin 5	3602	p.GLY202ARG	Autosomal recessive cutis laxa type IA(ClinVar)	Autosomal recessive cutis laxa type IA	C0268351	ARMD3|DANCE|EVEC|FIBL-5|FLJ90059|UP50	3602	G3V2P8:G3V329:G3V3Y2:G3V4U0:G3XA98:H0YJ31:Q9UBX5	NP_006320.2
Core matrisome	ECM Glycoproteins	FBLN5	fibulin 5	3602	p.GLY412GLU	Age-related macular degeneration 3(ClinVar)	Age-related macular degeneration	C0242383;C3495438	ARMD3|DANCE|EVEC|FIBL-5|FLJ90059|UP50	3602	G3V2P8:G3V329:G3V3Y2:G3V4U0:G3XA98:H0YJ31:Q9UBX5	NP_006320.2
Core matrisome	ECM Glycoproteins	FBLN5	fibulin 5	3602	p.ILE169THR	Age-related macular degeneration 3(ClinVar)	Age-related macular degeneration	C0242383;C3495438	ARMD3|DANCE|EVEC|FIBL-5|FLJ90059|UP50	3602	G3V2P8:G3V329:G3V3Y2:G3V4U0:G3XA98:H0YJ31:Q9UBX5	NP_006320.2
Core matrisome	ECM Glycoproteins	FBLN5	fibulin 5	3602	p.PRO87SER	Age-related macular degeneration 3(ClinVar)	Age-related macular degeneration	C0242383;C3495438	ARMD3|DANCE|EVEC|FIBL-5|FLJ90059|UP50	3602	G3V2P8:G3V329:G3V3Y2:G3V4U0:G3XA98:H0YJ31:Q9UBX5	NP_006320.2
Core matrisome	ECM Glycoproteins	FBLN5	fibulin 5	3602	p.SER227PRO	Autosomal recessive cutis laxa type IA(ClinVar)	Autosomal recessive cutis laxa type IA	C0268351	ARMD3|DANCE|EVEC|FIBL-5|FLJ90059|UP50	3602	G3V2P8:G3V329:G3V3Y2:G3V4U0:G3XA98:H0YJ31:Q9UBX5	NP_006320.2
Core matrisome	ECM Glycoproteins	FBLN5	fibulin 5	3602	p.VAL60LEU	Age-related macular degeneration 3(ClinVar)	Age-related macular degeneration	C0242383;C3495438	ARMD3|DANCE|EVEC|FIBL-5|FLJ90059|UP50	3602	G3V2P8:G3V329:G3V3Y2:G3V4U0:G3XA98:H0YJ31:Q9UBX5	NP_006320.2
Core matrisome	ECM Glycoproteins	FBN1	fibrillin 1	3603	p.ALA162THR	Marfan's syndrome(ClinVar)	Marfan's syndrome	C0024796	FBN|MASS|MFS1|OCTD|SGS|WMS	3603	F6U495:H0YN80:H0YND0:P35555	NP_000129.3
Core matrisome	ECM Glycoproteins	FBN1	fibrillin 1	3603	p.ALA2324THR	Marfan's syndrome(ClinVar)	Marfan's syndrome	C0024796	FBN|MASS|MFS1|OCTD|SGS|WMS	3603	F6U495:H0YN80:H0YND0:P35555	NP_000129.3
Core matrisome	ECM Glycoproteins	FBN1	fibrillin 1	3603	p.ALA686ASP	Marfan's syndrome(ClinVar)	Marfan syndrome	C0024796;C1414542	FBN|MASS|MFS1|OCTD|SGS|WMS	3603	F6U495:H0YN80:H0YND0:P35555	NP_000129.3
Core matrisome	ECM Glycoproteins	FBN1	fibrillin 1	3603	p.ARG1137PRO	Marfan syndrome\x2c severe classic(ClinVar)	Marfan syndrome	C0024796;C1414542	FBN|MASS|MFS1|OCTD|SGS|WMS	3603	F6U495:H0YN80:H0YND0:P35555	NP_000129.3
Core matrisome	ECM Glycoproteins	FBN1	fibrillin 1	3603	p.ARG1170HIS	Marfan syndrome\x2c subdiagnostic variant of(ClinVar)	Marfan syndrome	C0024796;C1414542	FBN|MASS|MFS1|OCTD|SGS|WMS	3603	F6U495:H0YN80:H0YND0:P35555	NP_000129.3
Core matrisome	ECM Glycoproteins	FBN1	fibrillin 1	3603	p.ARG122CYS	Marfan syndrome\x2c atypical|Marfan's syndrome(ClinVar)	Marfan syndrome	C0024796;C1414542	FBN|MASS|MFS1|OCTD|SGS|WMS	3603	F6U495:H0YN80:H0YND0:P35555	NP_000129.3
Core matrisome	ECM Glycoproteins	FBN1	fibrillin 1	3603	p.ARG1530CYS	Marfan's syndrome(ClinVar)	Ectopia lentis	C0013581	FBN|MASS|MFS1|OCTD|SGS|WMS	3603	F6U495:H0YN80:H0YND0:P35555	NP_000129.3
Core matrisome	ECM Glycoproteins	FBN1	fibrillin 1	3603	p.ARG1596TER	Marfan's syndrome(ClinVar)	Marfan syndrome	C0024796;C1414542	FBN|MASS|MFS1|OCTD|SGS|WMS	3603	F6U495:H0YN80:H0YND0:P35555	NP_000129.3
Core matrisome	ECM Glycoproteins	FBN1	fibrillin 1	3603	p.ARG240CYS	Marfan's syndrome|Ectopia lentis\x2c isolated\x2c autosomal dominant(ClinVar)	ECTOPIA LENTIS 1, ISOLATED, AUTOSOMAL DOMINANT	C3541518	FBN|MASS|MFS1|OCTD|SGS|WMS	3603	F6U495:H0YN80:H0YND0:P35555	NP_000129.3
Core matrisome	ECM Glycoproteins	FBN1	fibrillin 1	3603	p.ARG2576CYS	Marfan's syndrome(ClinVar)	Marfan's syndrome	C0024796	FBN|MASS|MFS1|OCTD|SGS|WMS	3603	F6U495:H0YN80:H0YND0:P35555	NP_000129.3
Core matrisome	ECM Glycoproteins	FBN1	fibrillin 1	3603	p.ARG2726TRP	Reclassified - variant of unknown significance|Marfan's syndrome(ClinVar)	Marfan syndrome	C0024796;C1414542	FBN|MASS|MFS1|OCTD|SGS|WMS	3603	F6U495:H0YN80:H0YND0:P35555	NP_000129.3
Core matrisome	ECM Glycoproteins	FBN1	fibrillin 1	3603	p.ARG2776TER	Marfan's syndrome(ClinVar)	Marfan syndrome	C0024796;C1414542	FBN|MASS|MFS1|OCTD|SGS|WMS	3603	F6U495:H0YN80:H0YND0:P35555	NP_000129.3
Core matrisome	ECM Glycoproteins	FBN1	fibrillin 1	3603	p.ARG485CYS	Marfan syndrome\x2c autosomal recessive(ClinVar)	Marfan syndrome	C0024796;C1414542	FBN|MASS|MFS1|OCTD|SGS|WMS	3603	F6U495:H0YN80:H0YND0:P35555	NP_000129.3
Core matrisome	ECM Glycoproteins	FBN1	fibrillin 1	3603	p.ARG529TER	Marfan's syndrome(ClinVar)	Marfan syndrome	C0024796;C1414542	FBN|MASS|MFS1|OCTD|SGS|WMS	3603	F6U495:H0YN80:H0YND0:P35555	NP_000129.3
Core matrisome	ECM Glycoproteins	FBN1	fibrillin 1	3603	p.ARG545HIS	Marfan's syndrome(ClinVar)	Marfan's syndrome	C0024796	FBN|MASS|MFS1|OCTD|SGS|WMS	3603	F6U495:H0YN80:H0YND0:P35555	NP_000129.3
Core matrisome	ECM Glycoproteins	FBN1	fibrillin 1	3603	p.ARG650CYS	Marfan's syndrome(ClinVar)	Marfan syndrome	C0024796;C1414542	FBN|MASS|MFS1|OCTD|SGS|WMS	3603	F6U495:H0YN80:H0YND0:P35555	NP_000129.3
Core matrisome	ECM Glycoproteins	FBN1	fibrillin 1	3603	p.ASN1131TYR	Marfan syndrome\x2c neonatal(ClinVar)	Marfan syndrome	C0024796;C1414542	FBN|MASS|MFS1|OCTD|SGS|WMS	3603	F6U495:H0YN80:H0YND0:P35555	NP_000129.3
Core matrisome	ECM Glycoproteins	FBN1	fibrillin 1	3603	p.ASN1489LYS	Marfan's syndrome(ClinVar)	Marfan syndrome	C0024796;C1414542	FBN|MASS|MFS1|OCTD|SGS|WMS	3603	F6U495:H0YN80:H0YND0:P35555	NP_000129.3
Core matrisome	ECM Glycoproteins	FBN1	fibrillin 1	3603	p.ASN1851SER	Marfan's syndrome(ClinVar)	Marfan's syndrome	C0024796	FBN|MASS|MFS1|OCTD|SGS|WMS	3603	F6U495:H0YN80:H0YND0:P35555	NP_000129.3
Core matrisome	ECM Glycoproteins	FBN1	fibrillin 1	3603	p.ASN2144SER	Marfan's syndrome(ClinVar)	Marfan syndrome	C0024796;C1414542	FBN|MASS|MFS1|OCTD|SGS|WMS	3603	F6U495:H0YN80:H0YND0:P35555	NP_000129.3
Core matrisome	ECM Glycoproteins	FBN1	fibrillin 1	3603	p.ASN2740SER	Marfan's syndrome(ClinVar)	Marfan's syndrome	C0024796	FBN|MASS|MFS1|OCTD|SGS|WMS	3603	F6U495:H0YN80:H0YND0:P35555	NP_000129.3
Core matrisome	ECM Glycoproteins	FBN1	fibrillin 1	3603	p.ASN28SER	Marfan's syndrome(ClinVar)	Marfan's syndrome	C0024796	FBN|MASS|MFS1|OCTD|SGS|WMS	3603	F6U495:H0YN80:H0YND0:P35555	NP_000129.3
Core matrisome	ECM Glycoproteins	FBN1	fibrillin 1	3603	p.ASN548ILE	Marfan's syndrome(ClinVar)	Marfan syndrome	C0024796;C1414542	FBN|MASS|MFS1|OCTD|SGS|WMS	3603	F6U495:H0YN80:H0YND0:P35555	NP_000129.3
Core matrisome	ECM Glycoproteins	FBN1	fibrillin 1	3603	p.ASP1891HIS	Marfan's syndrome(ClinVar)	Marfan syndrome	C0024796;C1414542	FBN|MASS|MFS1|OCTD|SGS|WMS	3603	F6U495:H0YN80:H0YND0:P35555	NP_000129.3
Core matrisome	ECM Glycoproteins	FBN1	fibrillin 1	3603	p.ASP2129TYR	Marfan's syndrome(ClinVar)	Marfan's syndrome	C0024796	FBN|MASS|MFS1|OCTD|SGS|WMS	3603	F6U495:H0YN80:H0YND0:P35555	NP_000129.3
Core matrisome	ECM Glycoproteins	FBN1	fibrillin 1	3603	p.ASP723ALA	Marfan's syndrome(ClinVar)	Marfan syndrome	C0024796;C1414542	FBN|MASS|MFS1|OCTD|SGS|WMS	3603	F6U495:H0YN80:H0YND0:P35555	NP_000129.3
Core matrisome	ECM Glycoproteins	FBN1	fibrillin 1	3603	p.ASP893HIS	Marfan's syndrome(ClinVar)	Marfan's syndrome	C0024796	FBN|MASS|MFS1|OCTD|SGS|WMS	3603	F6U495:H0YN80:H0YND0:P35555	NP_000129.3
Core matrisome	ECM Glycoproteins	FBN1	fibrillin 1	3603	p.CYS1032TYR	Marfan syndrome\x2c neonatal(ClinVar)	Marfan syndrome	C0024796;C1414542	FBN|MASS|MFS1|OCTD|SGS|WMS	3603	F6U495:H0YN80:H0YND0:P35555	NP_000129.3
Core matrisome	ECM Glycoproteins	FBN1	fibrillin 1	3603	p.CYS1074ARG	Marfan syndrome\x2c neonatal(ClinVar)	Marfan syndrome	C0024796;C1414542	FBN|MASS|MFS1|OCTD|SGS|WMS	3603	F6U495:H0YN80:H0YND0:P35555	NP_000129.3
Core matrisome	ECM Glycoproteins	FBN1	fibrillin 1	3603	p.CYS1086TYR	Marfan syndrome\x2c neonatal(ClinVar)	Marfan syndrome	C0024796;C1414542	FBN|MASS|MFS1|OCTD|SGS|WMS	3603	F6U495:H0YN80:H0YND0:P35555	NP_000129.3
Core matrisome	ECM Glycoproteins	FBN1	fibrillin 1	3603	p.CYS1117TYR	Marfan's syndrome(ClinVar)	Marfan syndrome	C0024796;C1414542	FBN|MASS|MFS1|OCTD|SGS|WMS	3603	F6U495:H0YN80:H0YND0:P35555	NP_000129.3
Core matrisome	ECM Glycoproteins	FBN1	fibrillin 1	3603	p.CYS1129TYR	Marfan's syndrome(ClinVar)	Marfan syndrome	C0024796;C1414542	FBN|MASS|MFS1|OCTD|SGS|WMS	3603	F6U495:H0YN80:H0YND0:P35555	NP_000129.3
Core matrisome	ECM Glycoproteins	FBN1	fibrillin 1	3603	p.CYS1221TYR	Marfan's syndrome(ClinVar)	MARFAN SYNDROME	C0024796;C1414542	FBN|MASS|MFS1|OCTD|SGS|WMS	3603	F6U495:H0YN80:H0YND0:P35555	NP_000129.3
Core matrisome	ECM Glycoproteins	FBN1	fibrillin 1	3603	p.CYS1223TYR	Marfan's syndrome(ClinVar)	Marfan syndrome	C0024796;C1414542	FBN|MASS|MFS1|OCTD|SGS|WMS	3603	F6U495:H0YN80:H0YND0:P35555	NP_000129.3
Core matrisome	ECM Glycoproteins	FBN1	fibrillin 1	3603	p.CYS1242TYR	Marfan's syndrome(ClinVar)	Marfan syndrome	C0024796;C1414542	FBN|MASS|MFS1|OCTD|SGS|WMS	3603	F6U495:H0YN80:H0YND0:P35555	NP_000129.3
Core matrisome	ECM Glycoproteins	FBN1	fibrillin 1	3603	p.CYS1249SER	Marfan's syndrome(ClinVar)	Marfan syndrome	C0024796;C1414542	FBN|MASS|MFS1|OCTD|SGS|WMS	3603	F6U495:H0YN80:H0YND0:P35555	NP_000129.3
Core matrisome	ECM Glycoproteins	FBN1	fibrillin 1	3603	p.CYS1265ARG	Marfan's syndrome(ClinVar)	Marfan syndrome	C0024796;C1414542	FBN|MASS|MFS1|OCTD|SGS|WMS	3603	F6U495:H0YN80:H0YND0:P35555	NP_000129.3
Core matrisome	ECM Glycoproteins	FBN1	fibrillin 1	3603	p.CYS129GLY	Marfan's syndrome(ClinVar)	Marfan syndrome	C0024796;C1414542	FBN|MASS|MFS1|OCTD|SGS|WMS	3603	F6U495:H0YN80:H0YND0:P35555	NP_000129.3
Core matrisome	ECM Glycoproteins	FBN1	fibrillin 1	3603	p.CYS1389GLY	Marfan's syndrome(ClinVar)	Marfan's syndrome	C0024796	FBN|MASS|MFS1|OCTD|SGS|WMS	3603	F6U495:H0YN80:H0YND0:P35555	NP_000129.3
Core matrisome	ECM Glycoproteins	FBN1	fibrillin 1	3603	p.CYS1562SER	Marfan's syndrome(ClinVar)	Marfan's syndrome	C0024796	FBN|MASS|MFS1|OCTD|SGS|WMS	3603	F6U495:H0YN80:H0YND0:P35555	NP_000129.3
Core matrisome	ECM Glycoproteins	FBN1	fibrillin 1	3603	p.CYS1663ARG	Marfan's syndrome(ClinVar)	Marfan syndrome	C0024796;C1414542	FBN|MASS|MFS1|OCTD|SGS|WMS	3603	F6U495:H0YN80:H0YND0:P35555	NP_000129.3
Core matrisome	ECM Glycoproteins	FBN1	fibrillin 1	3603	p.CYS186ARG	Marfan's syndrome(ClinVar)	Marfan's syndrome	C0024796	FBN|MASS|MFS1|OCTD|SGS|WMS	3603	F6U495:H0YN80:H0YND0:P35555	NP_000129.3
Core matrisome	ECM Glycoproteins	FBN1	fibrillin 1	3603	p.CYS2221SER	Marfan's syndrome(ClinVar)	Marfan syndrome	C0024796;C1414542	FBN|MASS|MFS1|OCTD|SGS|WMS	3603	F6U495:H0YN80:H0YND0:P35555	NP_000129.3
Core matrisome	ECM Glycoproteins	FBN1	fibrillin 1	3603	p.CYS2307SER	Marfan syndrome\x2c mild variable(ClinVar)	Marfan syndrome	C0024796;C1414542	FBN|MASS|MFS1|OCTD|SGS|WMS	3603	F6U495:H0YN80:H0YND0:P35555	NP_000129.3
Core matrisome	ECM Glycoproteins	FBN1	fibrillin 1	3603	p.CYS2633SER	Marfan's syndrome(ClinVar)	Marfan's syndrome	C0024796	FBN|MASS|MFS1|OCTD|SGS|WMS	3603	F6U495:H0YN80:H0YND0:P35555	NP_000129.3
Core matrisome	ECM Glycoproteins	FBN1	fibrillin 1	3603	p.CYS570TER	Marfan's syndrome(ClinVar)	Marfan's syndrome	C0024796	FBN|MASS|MFS1|OCTD|SGS|WMS	3603	F6U495:H0YN80:H0YND0:P35555	NP_000129.3
Core matrisome	ECM Glycoproteins	FBN1	fibrillin 1	3603	p.CYS790SER	Marfan's syndrome(ClinVar)	Marfan syndrome	C0024796;C1414542	FBN|MASS|MFS1|OCTD|SGS|WMS	3603	F6U495:H0YN80:H0YND0:P35555	NP_000129.3
Core matrisome	ECM Glycoproteins	FBN1	fibrillin 1	3603	p.CYS89PHE	Marfan's syndrome(ClinVar)	Marfan syndrome	C0024796;C1414542	FBN|MASS|MFS1|OCTD|SGS|WMS	3603	F6U495:H0YN80:H0YND0:P35555	NP_000129.3
Core matrisome	ECM Glycoproteins	FBN1	fibrillin 1	3603	p.GLU1073LYS	Marfan syndrome\x2c neonatal(ClinVar)	Marfan syndrome	C0024796;C1414542	FBN|MASS|MFS1|OCTD|SGS|WMS	3603	F6U495:H0YN80:H0YND0:P35555	NP_000129.3
Core matrisome	ECM Glycoproteins	FBN1	fibrillin 1	3603	p.GLU1160TER	Marfan's syndrome(ClinVar)	Marfan's syndrome	C0024796	FBN|MASS|MFS1|OCTD|SGS|WMS	3603	F6U495:H0YN80:H0YND0:P35555	NP_000129.3
Core matrisome	ECM Glycoproteins	FBN1	fibrillin 1	3603	p.GLU2667LYS	Marfan's syndrome(ClinVar)	Marfan's syndrome	C0024796	FBN|MASS|MFS1|OCTD|SGS|WMS	3603	F6U495:H0YN80:H0YND0:P35555	NP_000129.3
Core matrisome	ECM Glycoproteins	FBN1	fibrillin 1	3603	p.GLY1013ARG	Marfan's syndrome(ClinVar)	Marfan syndrome	C0024796;C1414542	FBN|MASS|MFS1|OCTD|SGS|WMS	3603	F6U495:H0YN80:H0YND0:P35555	NP_000129.3
Core matrisome	ECM Glycoproteins	FBN1	fibrillin 1	3603	p.GLY1127SER	Marfan syndrome\x2c mild|Marfan's syndrome(ClinVar)	Aortic aneurysm	C0003486;C0340629;C2072946	FBN|MASS|MFS1|OCTD|SGS|WMS	3603	F6U495:H0YN80:H0YND0:P35555	NP_000129.3
Core matrisome	ECM Glycoproteins	FBN1	fibrillin 1	3603	p.GLY2627ARG	Marfan's syndrome(ClinVar)	Marfan syndrome	C0024796;C1414542	FBN|MASS|MFS1|OCTD|SGS|WMS	3603	F6U495:H0YN80:H0YND0:P35555	NP_000129.3
Core matrisome	ECM Glycoproteins	FBN1	fibrillin 1	3603	p.GLY985GLU	Marfan syndrome\x2c atypical(ClinVar)	Marfan syndrome	C0024796;C1414542	FBN|MASS|MFS1|OCTD|SGS|WMS	3603	F6U495:H0YN80:H0YND0:P35555	NP_000129.3
Core matrisome	ECM Glycoproteins	FBN1	fibrillin 1	3603	p.HIS1187ARG	Marfan's syndrome(ClinVar)	Marfan's syndrome	C0024796	FBN|MASS|MFS1|OCTD|SGS|WMS	3603	F6U495:H0YN80:H0YND0:P35555	NP_000129.3
Core matrisome	ECM Glycoproteins	FBN1	fibrillin 1	3603	p.HIS2410PRO	Marfan's syndrome(ClinVar)	Marfan's syndrome	C0024796	FBN|MASS|MFS1|OCTD|SGS|WMS	3603	F6U495:H0YN80:H0YND0:P35555	NP_000129.3
Core matrisome	ECM Glycoproteins	FBN1	fibrillin 1	3603	p.ILE2269THR	Marfan's syndrome(ClinVar)	Marfan syndrome	C0024796;C1414542	FBN|MASS|MFS1|OCTD|SGS|WMS	3603	F6U495:H0YN80:H0YND0:P35555	NP_000129.3
Core matrisome	ECM Glycoproteins	FBN1	fibrillin 1	3603	p.LYS1043ARG	Marfan syndrome\x2c neonatal(ClinVar)	Marfan syndrome	C0024796;C1414542	FBN|MASS|MFS1|OCTD|SGS|WMS	3603	F6U495:H0YN80:H0YND0:P35555	NP_000129.3
Core matrisome	ECM Glycoproteins	FBN1	fibrillin 1	3603	p.PHE2556VAL	Marfan's syndrome(ClinVar)	Marfan's syndrome	C0024796	FBN|MASS|MFS1|OCTD|SGS|WMS	3603	F6U495:H0YN80:H0YND0:P35555	NP_000129.3
Core matrisome	ECM Glycoproteins	FBN1	fibrillin 1	3603	p.PRO1009ARG	Marfan's syndrome(ClinVar)	Marfan's syndrome	C0024796	FBN|MASS|MFS1|OCTD|SGS|WMS	3603	F6U495:H0YN80:H0YND0:P35555	NP_000129.3
Core matrisome	ECM Glycoproteins	FBN1	fibrillin 1	3603	p.PRO2471ARG	Marfan's syndrome(ClinVar)	Marfan's syndrome	C0024796	FBN|MASS|MFS1|OCTD|SGS|WMS	3603	F6U495:H0YN80:H0YND0:P35555	NP_000129.3
Core matrisome	ECM Glycoproteins	FBN1	fibrillin 1	3603	p.SER152CYS	Marfan's syndrome(ClinVar)	Marfan's syndrome	C0024796	FBN|MASS|MFS1|OCTD|SGS|WMS	3603	F6U495:H0YN80:H0YND0:P35555	NP_000129.3
Core matrisome	ECM Glycoproteins	FBN1	fibrillin 1	3603	p.SER19PHE	Marfan's syndrome(ClinVar)	Marfan's syndrome	C0024796	FBN|MASS|MFS1|OCTD|SGS|WMS	3603	F6U495:H0YN80:H0YND0:P35555	NP_000129.3
Core matrisome	ECM Glycoproteins	FBN1	fibrillin 1	3603	p.SER827PRO	Marfan's syndrome(ClinVar)	Marfan's syndrome	C0024796	FBN|MASS|MFS1|OCTD|SGS|WMS	3603	F6U495:H0YN80:H0YND0:P35555	NP_000129.3
Core matrisome	ECM Glycoproteins	FBN1	fibrillin 1	3603	p.SER836ARG	Marfan's syndrome(ClinVar)	Marfan's syndrome	C0024796	FBN|MASS|MFS1|OCTD|SGS|WMS	3603	F6U495:H0YN80:H0YND0:P35555	NP_000129.3
Core matrisome	ECM Glycoproteins	FBN1	fibrillin 1	3603	p.THR848PRO	Marfan's syndrome(ClinVar)	Marfan's syndrome	C0024796	FBN|MASS|MFS1|OCTD|SGS|WMS	3603	F6U495:H0YN80:H0YND0:P35555	NP_000129.3
Core matrisome	ECM Glycoproteins	FBN1	fibrillin 1	3603	p.TRP217GLY	Marfan's syndrome(ClinVar)	Marfan syndrome	C0024796;C1414542	FBN|MASS|MFS1|OCTD|SGS|WMS	3603	F6U495:H0YN80:H0YND0:P35555	NP_000129.3
Core matrisome	ECM Glycoproteins	FBN1	fibrillin 1	3603	p.TRP2602TER	Marfan's syndrome(ClinVar)	Marfan syndrome	C0024796;C1414542	FBN|MASS|MFS1|OCTD|SGS|WMS	3603	F6U495:H0YN80:H0YND0:P35555	NP_000129.3
Core matrisome	ECM Glycoproteins	FBN1	fibrillin 1	3603	p.TRP2756TER	Marfan's syndrome(ClinVar)	Marfan syndrome	C0024796;C1414542	FBN|MASS|MFS1|OCTD|SGS|WMS	3603	F6U495:H0YN80:H0YND0:P35555	NP_000129.3
Core matrisome	ECM Glycoproteins	FBN1	fibrillin 1	3603	p.TYR2113TER	Marfan's syndrome(ClinVar)	Marfan syndrome	C0024796;C1414542	FBN|MASS|MFS1|OCTD|SGS|WMS	3603	F6U495:H0YN80:H0YND0:P35555	NP_000129.3
Core matrisome	ECM Glycoproteins	FBN1	fibrillin 1	3603	p.TYR754CYS	Marfan's syndrome(ClinVar)	Marfan syndrome	C0024796;C1414542	FBN|MASS|MFS1|OCTD|SGS|WMS	3603	F6U495:H0YN80:H0YND0:P35555	NP_000129.3
Core matrisome	ECM Glycoproteins	FBN1	fibrillin 1	3603	p.VAL2234MET	Marfan's syndrome(ClinVar)	Marfan syndrome	C0024796;C1414542	FBN|MASS|MFS1|OCTD|SGS|WMS	3603	F6U495:H0YN80:H0YND0:P35555	NP_000129.3
Core matrisome	ECM Glycoproteins	FBN1	fibrillin 1	3603	p.VAL2358ILE	Marfan's syndrome(ClinVar)	Marfan's syndrome	C0024796	FBN|MASS|MFS1|OCTD|SGS|WMS	3603	F6U495:H0YN80:H0YND0:P35555	NP_000129.3
Core matrisome	ECM Glycoproteins	FBN2	fibrillin 2	3604	p.ASN1259LYS	Congenital contractural arachnodactyly(ClinVar)	Congenital contractural arachnodactyly	C0220668	CCA|DA9	3604	D6REJ2:D6RJI3:E9PHW4:P35556	NP_001990.2
Core matrisome	ECM Glycoproteins	FBN2	fibrillin 2	3604	p.ASP1115HIS	Congenital contractural arachnodactyly(ClinVar)	Congenital contractural arachnodactyly	C0220668	CCA|DA9	3604	D6REJ2:D6RJI3:E9PHW4:P35556	NP_001990.2
Core matrisome	ECM Glycoproteins	FBN2	fibrillin 2	3604	p.CYS1142PHE	Congenital contractural arachnodactyly(ClinVar)	Congenital contractural arachnodactyly	C0220668	CCA|DA9	3604	D6REJ2:D6RJI3:E9PHW4:P35556	NP_001990.2
Core matrisome	ECM Glycoproteins	FBN2	fibrillin 2	3604	p.CYS1253TRP	Congenital contractural arachnodactyly(ClinVar)	Congenital contractural arachnodactyly	C0220668	CCA|DA9	3604	D6REJ2:D6RJI3:E9PHW4:P35556	NP_001990.2
Core matrisome	ECM Glycoproteins	FBN2	fibrillin 2	3604	p.CYS1253TYR	Congenital contractural arachnodactyly(ClinVar)	Congenital contractural arachnodactyly	C0220668	CCA|DA9	3604	D6REJ2:D6RJI3:E9PHW4:P35556	NP_001990.2
Core matrisome	ECM Glycoproteins	FBN2	fibrillin 2	3604	p.GLU391LYS	Congenital contractural arachnodactyly(ClinVar)	Congenital contractural arachnodactyly	C0220668	CCA|DA9	3604	D6REJ2:D6RJI3:E9PHW4:P35556	NP_001990.2
Core matrisome	ECM Glycoproteins	FGA	fibrinogen alpha chain	3661	p.ARG35CYS	Dysfibrinogenemia|Fibrinogen milano xii\x2c digenic(ClinVar)	Dysfibrinogenaemia	C1260903	Fib2|MGC119422|MGC119423|MGC119425	3661	P02671	NP_000499.1:NP_068657.1
Core matrisome	ECM Glycoproteins	FGA	fibrinogen alpha chain	3661	p.ARG35HIS	Dysfibrinogenemia(ClinVar)	Dysfibrinogenaemia	C1260903	Fib2|MGC119422|MGC119423|MGC119425	3661	P02671	NP_000499.1:NP_068657.1
Core matrisome	ECM Glycoproteins	FGA	fibrinogen alpha chain	3661	p.ARG38GLY	FIBRINOGEN AARHUS 1(ClinVar)	Dysfibrinogenaemia	C1260903	Fib2|MGC119422|MGC119423|MGC119425	3661	P02671	NP_000499.1:NP_068657.1
Core matrisome	ECM Glycoproteins	FGA	fibrinogen alpha chain	3661	p.ARG573CYS	FIBRINOGEN DUSART|FIBRINOGEN PARIS 5(ClinVar)	Dysfibrinogenaemia	C1260903	Fib2|MGC119422|MGC119423|MGC119425	3661	P02671	NP_000499.1:NP_068657.1
Core matrisome	ECM Glycoproteins	FGA	fibrinogen alpha chain	3661	p.ARG573LEU	Familial visceral amyloidosis\x2c Ostertag type(ClinVar)	Amyloidosis, renal	C0268382;C1416945	Fib2|MGC119422|MGC119423|MGC119425	3661	P02671	NP_000499.1:NP_068657.1
Core matrisome	ECM Glycoproteins	FGA	fibrinogen alpha chain	3661	p.ASP26ASN	FIBRINOGEN LILLE 1(ClinVar)	Dysfibrinogenaemia	C1260903	Fib2|MGC119422|MGC119423|MGC119425	3661	P02671	NP_000499.1:NP_068657.1
Core matrisome	ECM Glycoproteins	FGA	fibrinogen alpha chain	3661	p.GLN347TER	FIBRINOGEN KEOKUK(ClinVar)	FIBRINOGEN KEOKUK	C4016073	Fib2|MGC119422|MGC119423|MGC119425	3661	P02671	NP_000499.1:NP_068657.1
Core matrisome	ECM Glycoproteins	FGA	fibrinogen alpha chain	3661	p.GLU545VAL	Familial visceral amyloidosis\x2c Ostertag type(ClinVar)	Amyloidosis, renal	C0268382;C1416945	Fib2|MGC119422|MGC119423|MGC119425	3661	P02671	NP_000499.1:NP_068657.1
Core matrisome	ECM Glycoproteins	FGA	fibrinogen alpha chain	3661	p.GLY31VAL	FIBRINOGEN ROUEN 1(ClinVar)	FIBRINOGEN ROUEN 1	C4016061	Fib2|MGC119422|MGC119423|MGC119425	3661	P02671	NP_000499.1:NP_068657.1
Core matrisome	ECM Glycoproteins	FGA	fibrinogen alpha chain	3661	p.LYS480TER	FIBRINOGEN MARBURG|Dysfibrinogenemia causing bleeding diathesis(ClinVar)	Dysfibrinogenaemia	C1260903	Fib2|MGC119422|MGC119423|MGC119425	3661	P02671	NP_000499.1:NP_068657.1
Core matrisome	ECM Glycoproteins	FGA	fibrinogen alpha chain	3661	p.PRO37LEU	FIBRINOGEN KYOTO 2(ClinVar)	Dysfibrinogenaemia	C1260903	Fib2|MGC119422|MGC119423|MGC119425	3661	P02671	NP_000499.1:NP_068657.1
Core matrisome	ECM Glycoproteins	FGA	fibrinogen alpha chain	3661	p.SER453ASN	FIBRINOGEN CARACAS-2(ClinVar)	Dysfibrinogenaemia	C1260903	Fib2|MGC119422|MGC119423|MGC119425	3661	P02671	NP_000499.1:NP_068657.1
Core matrisome	ECM Glycoproteins	FGA	fibrinogen alpha chain	3661	p.THR331ALA	Venous thromboembolism\x2c susceptibility to(ClinVar)	Venous thromboembolism, susceptibility to	C1858965	Fib2|MGC119422|MGC119423|MGC119425	3661	P02671	NP_000499.1:NP_068657.1
Core matrisome	ECM Glycoproteins	FGA	fibrinogen alpha chain	3661	p.VAL39ASP	FIBRINOGEN CANTERBURY(ClinVar)	Dysfibrinogenaemia	C1260903	Fib2|MGC119422|MGC119423|MGC119425	3661	P02671	NP_000499.1:NP_068657.1
Core matrisome	ECM Glycoproteins	FGB	fibrinogen beta chain	3662	p.ALA365THR	FIBRINOGEN PONTOISE 2(ClinVar)	FIBRINOGEN PONTOISE 2	C4016075	MGC104327|MGC120405	3662	D6REL8:F8W6P4:P02675	NP_001171670.1:NP_005132.2
Core matrisome	ECM Glycoproteins	FGB	fibrinogen beta chain	3662	p.ALA98THR	FIBRINOGEN NAPLES|FIBRINOGEN MILANO 2|Thrombophilia\x2c dysfibrinogenemic(ClinVar)	Dysfibrinogenaemia	C1260903	MGC104327|MGC120405	3662	D6REL8:F8W6P4:P02675	NP_001171670.1:NP_005132.2
Core matrisome	ECM Glycoproteins	FGB	fibrinogen beta chain	3662	p.ARG196CYS	FIBRINOGEN LONGMONT(ClinVar)	Congenital afibrinogenemia	C2584774	MGC104327|MGC120405	3662	D6REL8:F8W6P4:P02675	NP_001171670.1:NP_005132.2
Core matrisome	ECM Glycoproteins	FGB	fibrinogen beta chain	3662	p.ARG44CYS	FIBRINOGEN CHRISTCHURCH 2|FIBRINOGEN SEATTLE 1|FIBRINOGEN IJmuiden(ClinVar)	Dysfibrinogenaemia	C1260903	MGC104327|MGC120405	3662	D6REL8:F8W6P4:P02675	NP_001171670.1:NP_005132.2
Core matrisome	ECM Glycoproteins	FGB	fibrinogen beta chain	3662	p.ARG478LYS	FIBRINOGEN BALTIMORE 2(ClinVar)	FIBRINOGEN BALTIMORE 2	C4016076	MGC104327|MGC120405	3662	D6REL8:F8W6P4:P02675	NP_001171670.1:NP_005132.2
Core matrisome	ECM Glycoproteins	FGB	fibrinogen beta chain	3662	p.ARG47TER	Hypofibrinogenemia\x2c congenital(ClinVar)	Afibrinogenaemia	C0001733	MGC104327|MGC120405	3662	D6REL8:F8W6P4:P02675	NP_001171670.1:NP_005132.2
Core matrisome	ECM Glycoproteins	FGB	fibrinogen beta chain	3662	p.GLY430ASP	Afibrinogenemia\x2c congenital(ClinVar)	Afibrinogenaemia	C0001733	MGC104327|MGC120405	3662	D6REL8:F8W6P4:P02675	NP_001171670.1:NP_005132.2
Core matrisome	ECM Glycoproteins	FGB	fibrinogen beta chain	3662	p.GLY45CYS	FIBRINOGEN ISE(ClinVar)	Dysfibrinogenaemia	C1260903	MGC104327|MGC120405	3662	D6REL8:F8W6P4:P02675	NP_001171670.1:NP_005132.2
Core matrisome	ECM Glycoproteins	FGB	fibrinogen beta chain	3662	p.LEU202GLN	Hypofibrinogenemia\x2c congenital(ClinVar)	Afibrinogenaemia	C0001733	MGC104327|MGC120405	3662	D6REL8:F8W6P4:P02675	NP_001171670.1:NP_005132.2
Core matrisome	ECM Glycoproteins	FGB	fibrinogen beta chain	3662	p.LEU383ARG	Afibrinogenemia\x2c congenital(ClinVar)	Afibrinogenaemia	C0001733	MGC104327|MGC120405	3662	D6REL8:F8W6P4:P02675	NP_001171670.1:NP_005132.2
Core matrisome	ECM Glycoproteins	FGG	fibrinogen gamma chain	3694	p.ARG301CYS	FIBRINOGEN BALTIMORE 4|FIBRINOGEN MORIOKA 1|FIBRINOGEN OSAKA 2|FIBRINOGEN TOCHIGI 1|FIBRINOGEN TOKYO 2(ClinVar)	Dysfibrinogenaemia	C1260903	-	3694	C9JC84:C9JEU5:C9JPQ9:C9JU00:P02679	NP_000500.2:NP_068656.2
Core matrisome	ECM Glycoproteins	FGG	fibrinogen gamma chain	3694	p.ARG301HIS	FIBRINOGEN BERGAMO 2|FIBRINOGEN ESSEN 1|FIBRINOGEN HAIFA 1|FIBRINOGEN PERUGIA 1|FIBRINOGEN SAGA 1|FIBRINOGEN OSAKA 3(ClinVar)	Dysfibrinogenaemia	C1260903	-	3694	C9JC84:C9JEU5:C9JPQ9:C9JU00:P02679	NP_000500.2:NP_068656.2
Core matrisome	ECM Glycoproteins	FGG	fibrinogen gamma chain	3694	p.ARG401TRP	FIBRINOGEN OSAKA 5(ClinVar)	FIBRINOGEN OSAKA 5	C4016094	-	3694	C9JC84:C9JEU5:C9JPQ9:C9JU00:P02679	NP_000500.2:NP_068656.2
Core matrisome	ECM Glycoproteins	FGG	fibrinogen gamma chain	3694	p.ASN334ILE	FIBRINOGEN BALTIMORE 3(ClinVar)	Dysfibrinogenaemia	C1260903	-	3694	C9JC84:C9JEU5:C9JPQ9:C9JU00:P02679	NP_000500.2:NP_068656.2
Core matrisome	ECM Glycoproteins	FGG	fibrinogen gamma chain	3694	p.ASP356TYR	FIBRINOGEN KYOTO 3(ClinVar)	Dysfibrinogenaemia	C1260903	-	3694	C9JC84:C9JEU5:C9JPQ9:C9JU00:P02679	NP_000500.2:NP_068656.2
Core matrisome	ECM Glycoproteins	FGG	fibrinogen gamma chain	3694	p.ASP356VAL	FIBRINOGEN MILANO 1|Thrombophilia\x2c dysfibrinogenemic|FIBRINOGEN ALES(ClinVar)	Dysfibrinogenaemia	C1260903	-	3694	C9JC84:C9JEU5:C9JPQ9:C9JU00:P02679	NP_000500.2:NP_068656.2
Core matrisome	ECM Glycoproteins	FGG	fibrinogen gamma chain	3694	p.ASP390HIS	FIBRINOGEN MATSUMOTO 1(ClinVar)	Dysfibrinogenaemia	C1260903	-	3694	C9JC84:C9JEU5:C9JPQ9:C9JU00:P02679	NP_000500.2:NP_068656.2
Core matrisome	ECM Glycoproteins	FGG	fibrinogen gamma chain	3694	p.GLN355ARG	FIBRINOGEN NAGOYA 1(ClinVar)	Dysfibrinogenaemia	C1260903	-	3694	C9JC84:C9JEU5:C9JPQ9:C9JU00:P02679	NP_000500.2:NP_068656.2
Core matrisome	ECM Glycoproteins	FGG	fibrinogen gamma chain	3694	p.GLY191ARG	Fibrinogen milano xii\x2c digenic(ClinVar)	Fibrinogen milano xii, digenic	C4016097	-	3694	C9JC84:C9JEU5:C9JPQ9:C9JU00:P02679	NP_000500.2:NP_068656.2
Core matrisome	ECM Glycoproteins	FGG	fibrinogen gamma chain	3694	p.GLY318ARG	FIBRINOGEN GIESSEN 4(ClinVar)	FIBRINOGEN GIESSEN 4	C4016096	-	3694	C9JC84:C9JEU5:C9JPQ9:C9JU00:P02679	NP_000500.2:NP_068656.2
Core matrisome	ECM Glycoproteins	FGG	fibrinogen gamma chain	3694	p.GLY318VAL	FIBRINOGEN BALTIMORE 1(ClinVar)	Dysfibrinogenaemia	C1260903	-	3694	C9JC84:C9JEU5:C9JPQ9:C9JU00:P02679	NP_000500.2:NP_068656.2
Core matrisome	ECM Glycoproteins	FGG	fibrinogen gamma chain	3694	p.MET336THR	FIBRINOGEN ASAHI(ClinVar)	Dysfibrinogenaemia	C1260903	-	3694	C9JC84:C9JEU5:C9JPQ9:C9JU00:P02679	NP_000500.2:NP_068656.2
Core matrisome	ECM Glycoproteins	FN1	fibronectin 1	3778	p.LEU1883ARG	Glomerulopathy with fibronectin deposits 2(ClinVar)	Glomerulopathy with fibronectin deposits 2	C1866075	CIG|DKFZp686F10164|DKFZp686H0342|DKFZp686I1370|DKF	3778	F8W7G7:H0Y4K8:H0Y7Z1:P02751	NP_002017.1:NP_473375.2:NP_997639.1:NP_997641.1:NP_997643.1:NP_997647.1:XP_005246457.1:XP_005246463.1:XP_005246470.1:XP_005246472.1:XP_005246474.1
Core matrisome	ECM Glycoproteins	FN1	fibronectin 1	3778	p.TRP1834ARG	Glomerulopathy with fibronectin deposits 2(ClinVar)	Glomerulopathy with fibronectin deposits 2	C1866075	CIG|DKFZp686F10164|DKFZp686H0342|DKFZp686I1370|DKF	3778	F8W7G7:H0Y4K8:H0Y7Z1:P02751	NP_002017.1:NP_473375.2:NP_997639.1:NP_997641.1:NP_997643.1:NP_997647.1:XP_005246457.1:XP_005246463.1:XP_005246470.1:XP_005246472.1:XP_005246474.1
Core matrisome	ECM Glycoproteins	FN1	fibronectin 1	3778	p.TYR973CYS	Glomerulopathy with fibronectin deposits 2(ClinVar)	Glomerulopathy with fibronectin deposits	C3888104	CIG|DKFZp686F10164|DKFZp686H0342|DKFZp686I1370|DKF	3778	F8W7G7:H0Y4K8:H0Y7Z1:P02751	NP_002017.1:NP_473375.2:NP_997639.1:NP_997641.1:NP_997643.1:NP_997647.1:XP_005246457.1:XP_005246463.1:XP_005246470.1:XP_005246472.1:XP_005246474.1
Core matrisome	ECM Glycoproteins	FRAS1	Fraser syndrome 1	19185	p.GLN1267TER	Cryptophthalmos syndrome(ClinVar)	Cryptophthalmos syndrome	C0265233	DKFZp686I05113|DKFZp686P08111|FLJ14927|FLJ22031|KI	19185	D6RCP6:H0Y8V2:H0Y930:H0Y9A6:H0Y9C9:Q86XX4	NP_001159605.1:NP_079350.5
Core matrisome	ECM Glycoproteins	FRAS1	Fraser syndrome 1	19185	p.GLN2868TER	Cryptophthalmos syndrome(ClinVar)	Cryptophthalmos syndrome	C0265233	DKFZp686I05113|DKFZp686P08111|FLJ14927|FLJ22031|KI	19185	D6RCP6:H0Y8V2:H0Y930:H0Y9A6:H0Y9C9:Q86XX4	NP_001159605.1:NP_079350.5
Core matrisome	ECM Glycoproteins	FRAS1	Fraser syndrome 1	19185	p.GLN3005TER	Cryptophthalmos syndrome(ClinVar)	Cryptophthalmos syndrome	C0265233	DKFZp686I05113|DKFZp686P08111|FLJ14927|FLJ22031|KI	19185	D6RCP6:H0Y8V2:H0Y930:H0Y9A6:H0Y9C9:Q86XX4	NP_001159605.1:NP_079350.5
Core matrisome	ECM Glycoproteins	FRAS1	Fraser syndrome 1	19185	p.SER1424TER	Cryptophthalmos syndrome(ClinVar)	Cryptophthalmos syndrome	C0265233	DKFZp686I05113|DKFZp686P08111|FLJ14927|FLJ22031|KI	19185	D6RCP6:H0Y8V2:H0Y930:H0Y9A6:H0Y9C9:Q86XX4	NP_001159605.1:NP_079350.5
Core matrisome	ECM Glycoproteins	KAL1	Kallmann syndrome 1 sequence	6211	p.ARG257TER	Kallmann syndrome 1(ClinVar)	HYPOGONADOTROPIC HYPOGONADISM 1 WITH ANOSMIA	C4016502	ADMLX|HHA|KAL|KALIG-1|KMS	6211	P23352	NP_000207.2
Core matrisome	ECM Glycoproteins	KAL1	Kallmann syndrome 1 sequence	6211	p.ARG262TER	Kallmann syndrome 1(ClinVar)	HYPOGONADOTROPIC HYPOGONADISM 1 WITH ANOSMIA	C4016502	ADMLX|HHA|KAL|KALIG-1|KMS	6211	P23352	NP_000207.2
Core matrisome	ECM Glycoproteins	KAL1	Kallmann syndrome 1 sequence	6211	p.GLU514LYS	Kallmann syndrome 1(ClinVar)	HYPOGONADOTROPIC HYPOGONADISM 1 WITH ANOSMIA	C4016502	ADMLX|HHA|KAL|KALIG-1|KMS	6211	P23352	NP_000207.2
Core matrisome	ECM Glycoproteins	KAL1	Kallmann syndrome 1 sequence	6211	p.SER396LEU	Kallmann syndrome 1(ClinVar)	HYPOGONADOTROPIC HYPOGONADISM 1 WITH ANOSMIA	C4016502	ADMLX|HHA|KAL|KALIG-1|KMS	6211	P23352	NP_000207.2
Core matrisome	ECM Glycoproteins	KAL1	Kallmann syndrome 1 sequence	6211	p.TRP237TER	Kallmann syndrome 1(ClinVar)	HYPOGONADOTROPIC HYPOGONADISM 1 WITH ANOSMIA	C4016502	ADMLX|HHA|KAL|KALIG-1|KMS	6211	P23352	NP_000207.2
Core matrisome	ECM Glycoproteins	KAL1	Kallmann syndrome 1 sequence	6211	p.TRP258TER	Kallmann syndrome 1(ClinVar)	HYPOGONADOTROPIC HYPOGONADISM 1 WITH ANOSMIA	C4016502	ADMLX|HHA|KAL|KALIG-1|KMS	6211	P23352	NP_000207.2
Core matrisome	ECM Glycoproteins	LAMA2	laminin, alpha 2	6482	p.ARG1549TER	Congenital muscular dystrophy due to partial LAMA2 deficiency(ClinVar)	Congenital muscular dystrophy due to partial LAMA2 deficiency	C1842898	LAMM	6482	P24043	NP_000417.2:NP_001073291.1
Core matrisome	ECM Glycoproteins	LAMA2	laminin, alpha 2	6482	p.ARG2383TER	Congenital muscular dystrophy due to partial LAMA2 deficiency(ClinVar)	Congenital muscular dystrophy due to partial LAMA2 deficiency	C1842898	LAMM	6482	P24043	NP_000417.2:NP_001073291.1
Core matrisome	ECM Glycoproteins	LAMA2	laminin, alpha 2	6482	p.ARG2578TER	Merosin deficient congenital muscular dystrophy(ClinVar)	Merosin deficient congenital muscular dystrophy	C1263858	LAMM	6482	P24043	NP_000417.2:NP_001073291.1
Core matrisome	ECM Glycoproteins	LAMA2	laminin, alpha 2	6482	p.ARG3085TER	Merosin deficient congenital muscular dystrophy(ClinVar)	Merosin deficient congenital muscular dystrophy	C1263858	LAMM	6482	P24043	NP_000417.2:NP_001073291.1
Core matrisome	ECM Glycoproteins	LAMA2	laminin, alpha 2	6482	p.CYS527TYR	Congenital muscular dystrophy due to partial LAMA2 deficiency(ClinVar)	Congenital muscular dystrophy due to partial LAMA2 deficiency	C1842898	LAMM	6482	P24043	NP_000417.2:NP_001073291.1
Core matrisome	ECM Glycoproteins	LAMA2	laminin, alpha 2	6482	p.CYS862ARG	Congenital muscular dystrophy due to partial LAMA2 deficiency(ClinVar)	Congenital muscular dystrophy due to partial LAMA2 deficiency	C1842898	LAMM	6482	P24043	NP_000417.2:NP_001073291.1
Core matrisome	ECM Glycoproteins	LAMA2	laminin, alpha 2	6482	p.CYS967TER	Merosin deficient congenital muscular dystrophy(ClinVar)	Merosin deficient congenital muscular dystrophy	C1263858	LAMM	6482	P24043	NP_000417.2:NP_001073291.1
Core matrisome	ECM Glycoproteins	LAMA2	laminin, alpha 2	6482	p.GLN1240TER	Merosin deficient congenital muscular dystrophy(ClinVar)	Merosin deficient congenital muscular dystrophy	C1263858	LAMM	6482	P24043	NP_000417.2:NP_001073291.1
Core matrisome	ECM Glycoproteins	LAMA2	laminin, alpha 2	6482	p.HIS2627GLN	Merosin deficient congenital muscular dystrophy(ClinVar)	Merosin deficient congenital muscular dystrophy	C1263858	LAMM	6482	P24043	NP_000417.2:NP_001073291.1
Core matrisome	ECM Glycoproteins	LAMA2	laminin, alpha 2	6482	p.LEU2564PRO	Merosin deficient congenital muscular dystrophy(ClinVar)	Merosin deficient congenital muscular dystrophy	C1263858	LAMM	6482	P24043	NP_000417.2:NP_001073291.1
Core matrisome	ECM Glycoproteins	LAMA3	laminin, alpha 3	6483	p.ARG650TER	Junctional epidermolysis bullosa gravis of Herlitz(ClinVar)	EPIDERMOLYSIS BULLOSA, JUNCTIONAL, HERLITZ TYPE	C0079683	BM600|E170|LAMNA|LOCS|lama3a	6483	K7EIP4:K7EMU9:K7EPP3:K7EQ42:K7ERM0:Q16787	NP_000218.2:NP_001121189.1:NP_001121190.1:NP_937762.1
Core matrisome	ECM Glycoproteins	LAMA3	laminin, alpha 3	6483	p.ARG661TER	Junctional epidermolysis bullosa gravis of Herlitz(ClinVar)	Epidermolysis bullosa, Herlitz	C0079683	BM600|E170|LAMNA|LOCS|lama3a	6483	K7EIP4:K7EMU9:K7EPP3:K7EQ42:K7ERM0:Q16787	NP_000218.2:NP_001121189.1:NP_001121190.1:NP_937762.1
Core matrisome	ECM Glycoproteins	LAMA3	laminin, alpha 3	6483	p.GLN1379TER	Adult junctional epidermolysis bullosa(ClinVar)	Adult junctional epidermolysis bullosa	C0268374	BM600|E170|LAMNA|LOCS|lama3a	6483	K7EIP4:K7EMU9:K7EPP3:K7EQ42:K7ERM0:Q16787	NP_000218.2:NP_001121189.1:NP_001121190.1:NP_937762.1
Core matrisome	ECM Glycoproteins	LAMB2	laminin, beta 2 (laminin S)	6487	p.ARG246GLN	Nephrotic syndrome\x2c type 5\x2c with or without ocular abnormalities(ClinVar)	Nephrotic syndrome	C0027726	LAMS	6487	F5H520:P55268	NP_002283.3:XP_005265184.1
Core matrisome	ECM Glycoproteins	LAMB2	laminin, beta 2 (laminin S)	6487	p.ASN1380LYS	Nephrotic syndrome\x2c type 5\x2c with or without ocular abnormalities(ClinVar)	NEPHROTIC SYNDROME, TYPE 5, WITH OCULAR ABNORMALITIES	C4016240	LAMS	6487	F5H520:P55268	NP_002283.3:XP_005265184.1
Core matrisome	ECM Glycoproteins	LAMB2	laminin, beta 2 (laminin S)	6487	p.CYS321ARG	Nephrotic syndrome\x2c type 5\x2c with or without ocular abnormalities(ClinVar)	Nephrotic syndrome	C0027726	LAMS	6487	F5H520:P55268	NP_002283.3:XP_005265184.1
Core matrisome	ECM Glycoproteins	LAMB2	laminin, beta 2 (laminin S)	6487	p.LEU1393PHE	Nephrotic syndrome\x2c type 5\x2c with or without ocular abnormalities(ClinVar)	Nephrotic syndrome	C0027726	LAMS	6487	F5H520:P55268	NP_002283.3:XP_005265184.1
Core matrisome	ECM Glycoproteins	LAMB3	laminin, beta 3	6490	p.ARG42TER	Junctional epidermolysis bullosa gravis of Herlitz|Adult junctional epidermolysis bullosa(ClinVar)	Epidermolysis bullosa, junctional	C0079301	BM600-125KDA|FLJ99565|LAM5|LAMNB1	6490	Q13751:Q5THA1:X1WI29	NP_000219.2:NP_001017402.1:NP_001121113.1:XP_005273181.1
Core matrisome	ECM Glycoproteins	LAMB3	laminin, beta 3	6490	p.ARG635TER	Junctional epidermolysis bullosa gravis of Herlitz|Adult junctional epidermolysis bullosa(ClinVar)	Epidermolysis bullosa, Herlitz	C0079683	BM600-125KDA|FLJ99565|LAM5|LAMNB1	6490	Q13751:Q5THA1:X1WI29	NP_000219.2:NP_001017402.1:NP_001121113.1:XP_005273181.1
Core matrisome	ECM Glycoproteins	LAMB3	laminin, beta 3	6490	p.GLN166TER	Junctional epidermolysis bullosa gravis of Herlitz(ClinVar)	Epidermolysis bullosa, Herlitz	C0079683	BM600-125KDA|FLJ99565|LAM5|LAMNB1	6490	Q13751:Q5THA1:X1WI29	NP_000219.2:NP_001017402.1:NP_001121113.1:XP_005273181.1
Core matrisome	ECM Glycoproteins	LAMB3	laminin, beta 3	6490	p.GLN243TER	Junctional epidermolysis bullosa gravis of Herlitz(ClinVar)	Epidermolysis bullosa, Herlitz	C0079683	BM600-125KDA|FLJ99565|LAM5|LAMNB1	6490	Q13751:Q5THA1:X1WI29	NP_000219.2:NP_001017402.1:NP_001121113.1:XP_005273181.1
Core matrisome	ECM Glycoproteins	LAMB3	laminin, beta 3	6490	p.GLN936TER	Junctional epidermolysis bullosa gravis of Herlitz(ClinVar)	Epidermolysis bullosa, Herlitz	C0079683	BM600-125KDA|FLJ99565|LAM5|LAMNB1	6490	Q13751:Q5THA1:X1WI29	NP_000219.2:NP_001017402.1:NP_001121113.1:XP_005273181.1
Core matrisome	ECM Glycoproteins	LAMB3	laminin, beta 3	6490	p.GLU210LYS	Adult junctional epidermolysis bullosa(ClinVar)	Adult junctional epidermolysis bullosa	C0268374	BM600-125KDA|FLJ99565|LAM5|LAMNB1	6490	Q13751:Q5THA1:X1WI29	NP_000219.2:NP_001017402.1:NP_001121113.1:XP_005273181.1
Core matrisome	ECM Glycoproteins	LAMB3	laminin, beta 3	6490	p.TRP610TER	Junctional epidermolysis bullosa gravis of Herlitz(ClinVar)	Epidermolysis bullosa, Herlitz	C0079683	BM600-125KDA|FLJ99565|LAM5|LAMNB1	6490	Q13751:Q5THA1:X1WI29	NP_000219.2:NP_001017402.1:NP_001121113.1:XP_005273181.1
Core matrisome	ECM Glycoproteins	LAMC2	laminin, gamma 2	6493	p.ARG245TER	Adult junctional epidermolysis bullosa(ClinVar)	Adult junctional epidermolysis bullosa	C0268374	B2T|BM600|CSF|EBR2|EBR2A|LAMB2T|LAMNB2|MGC138491|M	6493	Q13753	NP_005553.2:NP_061486.2
Core matrisome	ECM Glycoproteins	LAMC2	laminin, gamma 2	6493	p.ARG95TER	Junctional epidermolysis bullosa gravis of Herlitz(ClinVar)	Epidermolysis bullosa, Herlitz	C0079683	B2T|BM600|CSF|EBR2|EBR2A|LAMB2T|LAMNB2|MGC138491|M	6493	Q13753	NP_005553.2:NP_061486.2
Core matrisome	ECM Glycoproteins	LAMC2	laminin, gamma 2	6493	p.CYS553TER	Junctional epidermolysis bullosa gravis of Herlitz(ClinVar)	Epidermolysis bullosa, Herlitz	C0079683	B2T|BM600|CSF|EBR2|EBR2A|LAMB2T|LAMNB2|MGC138491|M	6493	Q13753	NP_005553.2:NP_061486.2
Core matrisome	ECM Glycoproteins	LAMC2	laminin, gamma 2	6493	p.TYR355TER	Junctional epidermolysis bullosa gravis of Herlitz(ClinVar)	Epidermolysis bullosa, Herlitz	C0079683	B2T|BM600|CSF|EBR2|EBR2A|LAMB2T|LAMNB2|MGC138491|M	6493	Q13753	NP_005553.2:NP_061486.2
Core matrisome	ECM Glycoproteins	LGI1	leucine-rich, glioma inactivated 1	6572	p.ARG136TRP	Epilepsy\x2c lateral temporal lobe\x2c autosomal dominant(ClinVar)	ETL1	C1367458;C1425496;C1706323;C1838062	EPITEMPIN|EPT|ETL1|IB1099	6572	O95970	NP_005088.1:XP_005270329.1
Core matrisome	ECM Glycoproteins	LGI1	leucine-rich, glioma inactivated 1	6572	p.CYS46ARG	Epilepsy\x2c lateral temporal lobe\x2c autosomal dominant(ClinVar)	ETL1	C1367458;C1425496;C1706323;C1838062	EPITEMPIN|EPT|ETL1|IB1099	6572	O95970	NP_005088.1:XP_005270329.1
Core matrisome	ECM Glycoproteins	LGI1	leucine-rich, glioma inactivated 1	6572	p.GLU383ALA	Epilepsy\x2c lateral temporal lobe\x2c autosomal dominant(ClinVar)	ETL1	C1367458;C1425496;C1706323;C1838062	EPITEMPIN|EPT|ETL1|IB1099	6572	O95970	NP_005088.1:XP_005270329.1
Core matrisome	ECM Glycoproteins	LGI1	leucine-rich, glioma inactivated 1	6572	p.PHE318CYS	Epilepsy\x2c lateral temporal lobe\x2c autosomal dominant(ClinVar)	ETL1	C1367458;C1425496;C1706323;C1838062	EPITEMPIN|EPT|ETL1|IB1099	6572	O95970	NP_005088.1:XP_005270329.1
Core matrisome	ECM Glycoproteins	LTBP2	latent transforming growth factor beta binding protein 2	6715	p.ARG299TER	Glaucoma 3\x2c primary congenital\x2c d|Microspherophakia(ClinVar)	GLAUCOMA 3, PRIMARY CONGENITAL, D	C2751316	C14orf141|GLC3D|LTBP3|MSTP031	6715	G3V254:G3V3X5:G3V511:H0YJ20:Q14767	NP_000419.1
Core matrisome	ECM Glycoproteins	LTBP2	latent transforming growth factor beta binding protein 2	6715	p.ARG495GLN	Primary open angle glaucoma(ClinVar)	Primary open angle glaucoma	C0339573	C14orf141|GLC3D|LTBP3|MSTP031	6715	G3V254:G3V3X5:G3V511:H0YJ20:Q14767	NP_000419.1
Core matrisome	ECM Glycoproteins	LTBP2	latent transforming growth factor beta binding protein 2	6715	p.ARG548TER	Marfan's syndrome(ClinVar)	Marfan syndrome	C0024796;C1414542	C14orf141|GLC3D|LTBP3|MSTP031	6715	G3V254:G3V3X5:G3V511:H0YJ20:Q14767	NP_000419.1
Core matrisome	ECM Glycoproteins	LTBP2	latent transforming growth factor beta binding protein 2	6715	p.GLN111TER	Glaucoma 3\x2c primary congenital\x2c d(ClinVar)	Glaucoma 3, primary congenital, d	C2751316	C14orf141|GLC3D|LTBP3|MSTP031	6715	G3V254:G3V3X5:G3V511:H0YJ20:Q14767	NP_000419.1
Core matrisome	ECM Glycoproteins	LTBP2	latent transforming growth factor beta binding protein 2	6715	p.GLN1417ARG	Primary open angle glaucoma(ClinVar)	Primary open angle glaucoma	C0339573	C14orf141|GLC3D|LTBP3|MSTP031	6715	G3V254:G3V3X5:G3V511:H0YJ20:Q14767	NP_000419.1
Core matrisome	ECM Glycoproteins	LTBP2	latent transforming growth factor beta binding protein 2	6715	p.GLU1191LYS	Primary open angle glaucoma(ClinVar)	Primary open angle glaucoma	C0339573	C14orf141|GLC3D|LTBP3|MSTP031	6715	G3V254:G3V3X5:G3V511:H0YJ20:Q14767	NP_000419.1
Core matrisome	ECM Glycoproteins	LTBP2	latent transforming growth factor beta binding protein 2	6715	p.ILE667LEU	Pseudoexfoliation glaucoma(ClinVar)	Pseudoexfoliation glaucoma	C0206368	C14orf141|GLC3D|LTBP3|MSTP031	6715	G3V254:G3V3X5:G3V511:H0YJ20:Q14767	NP_000419.1
Core matrisome	ECM Glycoproteins	LTBP2	latent transforming growth factor beta binding protein 2	6715	p.MET1567VAL	Pseudoexfoliation glaucoma(ClinVar)	Pseudoexfoliation glaucoma	C0206368	C14orf141|GLC3D|LTBP3|MSTP031	6715	G3V254:G3V3X5:G3V511:H0YJ20:Q14767	NP_000419.1
Core matrisome	ECM Glycoproteins	LTBP2	latent transforming growth factor beta binding protein 2	6715	p.PRO432LEU	Pseudoexfoliation glaucoma(ClinVar)	Pseudoexfoliation glaucoma	C0206368	C14orf141|GLC3D|LTBP3|MSTP031	6715	G3V254:G3V3X5:G3V511:H0YJ20:Q14767	NP_000419.1
Core matrisome	ECM Glycoproteins	LTBP2	latent transforming growth factor beta binding protein 2	6715	p.VAL1638MET	Primary open angle glaucoma(ClinVar)	Primary open angle glaucoma	C0339573	C14orf141|GLC3D|LTBP3|MSTP031	6715	G3V254:G3V3X5:G3V511:H0YJ20:Q14767	NP_000419.1
Core matrisome	ECM Glycoproteins	LTBP3	latent transforming growth factor beta binding protein 3	6716	p.TYR774TER	Tooth agenesis\x2c selective\x2c 6(ClinVar)	Oligodontia	C0020608;C0399352	DKFZp586M2123|FLJ33431|FLJ39893|FLJ42533|FLJ44138|	6716	E9PJR2:E9PKW1:E9PPT7:E9PQR0:E9PR75:E9PR84:E9PRF2:F5GWC4:H0YC99:H0YCQ2:H0YCX6:H0YE75:Q9NS15	NP_001123616.1:NP_001157738.1:NP_066548.2
Core matrisome	ECM Glycoproteins	LTBP4	latent transforming growth factor beta binding protein 4	6717	p.CYS311GLY	Cutis laxa with severe pulmonary\x2c gastrointestinal\x2c and urinary abnormalities(ClinVar)	Cutis laxa with severe pulmonary, gastrointestinal, and urinary abnormalities	C2750804	FLJ46318|FLJ90018|LTBP-4|LTBP4L|LTBP4S	6717	E7ENG9:E7EUU1:F5GXC9:F8WAA0:M0QXV3:M0QYE9:M0QZX0:M0R351:Q8N2S1	NP_001036009.1:NP_001036010.1:NP_003564.2
Core matrisome	ECM Glycoproteins	LTBP4	latent transforming growth factor beta binding protein 4	6717	p.CYS857TER	Cutis laxa with severe pulmonary\x2c gastrointestinal\x2c and urinary abnormalities(ClinVar)	Cutis laxa with severe pulmonary, gastrointestinal, and urinary abnormalities	C2750804	FLJ46318|FLJ90018|LTBP-4|LTBP4L|LTBP4S	6717	E7ENG9:E7EUU1:F5GXC9:F8WAA0:M0QXV3:M0QYE9:M0QZX0:M0R351:Q8N2S1	NP_001036009.1:NP_001036010.1:NP_003564.2
Core matrisome	ECM Glycoproteins	MATN3	matrilin 3	6909	p.ALA128PRO	Multiple epiphyseal dysplasia 5(ClinVar)	EPIPHYSEAL DYSPLASIA, MULTIPLE, 5	C1846843	DIPOA|EDM5|HOA|OADIP|OS2	6909	O15232	NP_002372.1
Core matrisome	ECM Glycoproteins	MATN3	matrilin 3	6909	p.ALA219ASP	Multiple epiphyseal dysplasia 5(ClinVar)	EPIPHYSEAL DYSPLASIA, MULTIPLE, 5	C1846843	DIPOA|EDM5|HOA|OADIP|OS2	6909	O15232	NP_002372.1
Core matrisome	ECM Glycoproteins	MATN3	matrilin 3	6909	p.ARG121TRP	Multiple epiphyseal dysplasia 5(ClinVar)	EPIPHYSEAL DYSPLASIA, MULTIPLE, 5	C1846843	DIPOA|EDM5|HOA|OADIP|OS2	6909	O15232	NP_002372.1
Core matrisome	ECM Glycoproteins	MATN3	matrilin 3	6909	p.ARG70HIS	Multiple epiphyseal dysplasia 5(ClinVar)	EPIPHYSEAL DYSPLASIA, MULTIPLE, 5	C1846843	DIPOA|EDM5|HOA|OADIP|OS2	6909	O15232	NP_002372.1
Core matrisome	ECM Glycoproteins	MATN3	matrilin 3	6909	p.THR303MET	Osteoarthritis of distal interphalangeal joint(ClinVar)	Osteoarthritis of distal interphalangeal joint	C0409957;C3668817	DIPOA|EDM5|HOA|OADIP|OS2	6909	O15232	NP_002372.1
Core matrisome	ECM Glycoproteins	MATN3	matrilin 3	6909	p.VAL194ASP	Multiple epiphyseal dysplasia 5(ClinVar)	EPIPHYSEAL DYSPLASIA, MULTIPLE, 5	C1846843	DIPOA|EDM5|HOA|OADIP|OS2	6909	O15232	NP_002372.1
Core matrisome	ECM Glycoproteins	SRPX2	sushi-repeat-containing protein, X-linked 2	30668	p.ASN327SER	X-linked rolandic epilepsy with mental retardation and speech dyspraxia(ClinVar)	RESDX	C1845070	BPP|CBPS|PMGX|RESDX|SRPUL	30668	O60687	NP_055282.1:XP_005262178.1
Core matrisome	ECM Glycoproteins	SRPX2	sushi-repeat-containing protein, X-linked 2	30668	p.TYR72SER	X-linked rolandic epilepsy with mental retardation and speech dyspraxia(ClinVar)	BPP	C0203425;C1845668	BPP|CBPS|PMGX|RESDX|SRPUL	30668	O60687	NP_055282.1:XP_005262178.1
Core matrisome	ECM Glycoproteins	TECTA	tectorin alpha	11720	p.ARG1890CYS	Deafness\x2c autosomal dominant 12(ClinVar)	DFNA12	C1832187;C3813718	DFNA12|DFNA8|DFNB21	11720	O75443	NP_005413.2
Core matrisome	ECM Glycoproteins	TECTA	tectorin alpha	11720	p.ARG2021HIS	Deafness\x2c autosomal dominant 12(ClinVar)	Deafness	C0011053;C0018772	DFNA12|DFNA8|DFNB21	11720	O75443	NP_005413.2
Core matrisome	ECM Glycoproteins	TECTA	tectorin alpha	11720	p.CYS1837ARG	Deafness\x2c autosomal dominant 12,Deafness\x2c autosomal dominant 12(ClinVar)	Deafness	C0011053;C0018772	DFNA12|DFNA8|DFNB21	11720	O75443	NP_005413.2
Core matrisome	ECM Glycoproteins	TECTA	tectorin alpha	11720	p.TYR1870CYS	Deafness\x2c autosomal dominant 12(ClinVar)	DFNA12	C1832187;C3813718	DFNA12|DFNA8|DFNB21	11720	O75443	NP_005413.2
Core matrisome	ECM Glycoproteins	TGFBI	transforming growth factor, beta-induced, 68kDa	11771	p.ALA546ASP	Lattice corneal dystrophy Type I(ClinVar)	CDL1	C1413293;C1690006	BIGH3|CDB1|CDG2|CDGG1|CSD|CSD1|CSD2|CSD3|EBMD|LCD1	11771	D6RBX4:G8JLA8:H0Y8L3:H0Y8M8:H0Y9D7:H0YAB8:H0YAH8:Q15582:S4R3C6	NP_000349.1
Core matrisome	ECM Glycoproteins	TGFBI	transforming growth factor, beta-induced, 68kDa	11771	p.ARG124HIS	Avellino corneal dystrophy,Reis-Bucklers' corneal dystrophy(ClinVar)	ACD	C0002873;C0050552;C1275685;C1510822;C1538901;C1550741	BIGH3|CDB1|CDG2|CDGG1|CSD|CSD1|CSD2|CSD3|EBMD|LCD1	11771	D6RBX4:G8JLA8:H0Y8L3:H0Y8M8:H0Y9D7:H0YAB8:H0YAH8:Q15582:S4R3C6	NP_000349.1
Core matrisome	ECM Glycoproteins	TGFBI	transforming growth factor, beta-induced, 68kDa	11771	p.ARG124SER	CORNEAL DYSTROPHY\x2c GROENOUW TYPE I,Lattice corneal dystrophy Type I(ClinVar)	CDGG1	C1336623;C1641846;C1704975	BIGH3|CDB1|CDG2|CDGG1|CSD|CSD1|CSD2|CSD3|EBMD|LCD1	11771	D6RBX4:G8JLA8:H0Y8L3:H0Y8M8:H0Y9D7:H0YAB8:H0YAH8:Q15582:S4R3C6	NP_000349.1
Core matrisome	ECM Glycoproteins	TGFBI	transforming growth factor, beta-induced, 68kDa	11771	p.ARG555GLN	Thiel-Behnke corneal dystrophy(ClinVar)	CDTB	C1413251;C1562894	BIGH3|CDB1|CDG2|CDGG1|CSD|CSD1|CSD2|CSD3|EBMD|LCD1	11771	D6RBX4:G8JLA8:H0Y8L3:H0Y8M8:H0Y9D7:H0YAB8:H0YAH8:Q15582:S4R3C6	NP_000349.1
Core matrisome	ECM Glycoproteins	TGFBI	transforming growth factor, beta-induced, 68kDa	11771	p.ARG666SER	Corneal epithelial dystrophy(ClinVar)	CORNEAL DYSTROPHY, EPITHELIAL BASEMENT MEMBRANE	C0521723	BIGH3|CDB1|CDG2|CDGG1|CSD|CSD1|CSD2|CSD3|EBMD|LCD1	11771	D6RBX4:G8JLA8:H0Y8L3:H0Y8M8:H0Y9D7:H0YAB8:H0YAH8:Q15582:S4R3C6	NP_000349.1
Core matrisome	ECM Glycoproteins	TGFBI	transforming growth factor, beta-induced, 68kDa	11771	p.GLY623ASP	Reis-Bucklers' corneal dystrophy(ClinVar)	CDL1	C1413293;C1690006	BIGH3|CDB1|CDG2|CDGG1|CSD|CSD1|CSD2|CSD3|EBMD|LCD1	11771	D6RBX4:G8JLA8:H0Y8L3:H0Y8M8:H0Y9D7:H0YAB8:H0YAH8:Q15582:S4R3C6	NP_000349.1
Core matrisome	ECM Glycoproteins	TGFBI	transforming growth factor, beta-induced, 68kDa	11771	p.LEU509ARG	Corneal epithelial dystrophy(ClinVar)	CORNEAL DYSTROPHY, EPITHELIAL BASEMENT MEMBRANE	C0521723	BIGH3|CDB1|CDG2|CDGG1|CSD|CSD1|CSD2|CSD3|EBMD|LCD1	11771	D6RBX4:G8JLA8:H0Y8L3:H0Y8M8:H0Y9D7:H0YAB8:H0YAH8:Q15582:S4R3C6	NP_000349.1
Core matrisome	ECM Glycoproteins	TGFBI	transforming growth factor, beta-induced, 68kDa	11771	p.PRO551GLN	Lattice corneal dystrophy Type I(ClinVar)	CDL1	C1413293;C1690006	BIGH3|CDB1|CDG2|CDGG1|CSD|CSD1|CSD2|CSD3|EBMD|LCD1	11771	D6RBX4:G8JLA8:H0Y8L3:H0Y8M8:H0Y9D7:H0YAB8:H0YAH8:Q15582:S4R3C6	NP_000349.1
Core matrisome	ECM Glycoproteins	TNXB	tenascin XB	11976	p.VAL1108MET	Ehlers-Danlos syndrome\x2c type 3(ClinVar)	Ehlers-Danlos syndrome, type 3	C0268337	HXBL|TENX|TNX|TNXB1|TNXB2|TNXBS|XB|XBS	11976	C9J7W4:E7EPZ9:P22105	NP_061978.6:NP_115859.2
Core matrisome	ECM Glycoproteins	VWF	von Willebrand factor	12726	p.ARG1205LEU	.,von Willebrand disease type 1|von Willebrand factor vicenza(ClinVar)	Von Willebrand disease	C0042974	F8VWF|VWD	12726	I3L4K4:P04275:Q8TCE8	NP_000543.2
Core matrisome	ECM Glycoproteins	VWF	von Willebrand factor	12726	p.ARG1306TRP	von Willebrand disease\x2c type 2b(ClinVar)	VWD2	C1264040	F8VWF|VWD	12726	I3L4K4:P04275:Q8TCE8	NP_000543.2
Core matrisome	ECM Glycoproteins	VWF	von Willebrand factor	12726	p.ARG1308CYS	von Willebrand disease\x2c type 2b(ClinVar)	VWD2	C1264040	F8VWF|VWD	12726	I3L4K4:P04275:Q8TCE8	NP_000543.2
Core matrisome	ECM Glycoproteins	VWF	von Willebrand factor	12726	p.ARG1341LEU	.,.,von Willebrand disease\x2c type 2b(ClinVar)	von Willebrand disease, type 2b	C1282971	F8VWF|VWD	12726	I3L4K4:P04275:Q8TCE8	NP_000543.2
Core matrisome	ECM Glycoproteins	VWF	von Willebrand factor	12726	p.ARG1597TRP	von Willebrand disease\x2c type 2a,.(ClinVar)	VWD2	C1264040	F8VWF|VWD	12726	I3L4K4:P04275:Q8TCE8	NP_000543.2
Core matrisome	ECM Glycoproteins	VWF	von Willebrand factor	12726	p.ARG1659TER	von Willebrand disease type 3|von Willebrand disease type 1(ClinVar)	von Willebrand disease type 3	C1264041	F8VWF|VWD	12726	I3L4K4:P04275:Q8TCE8	NP_000543.2
Core matrisome	ECM Glycoproteins	VWF	von Willebrand factor	12726	p.ARG1853TER	von Willebrand disease type 3|von Willebrand disease type 1(ClinVar)	von Willebrand disease type 3	C1264041	F8VWF|VWD	12726	I3L4K4:P04275:Q8TCE8	NP_000543.2
Core matrisome	ECM Glycoproteins	VWF	von Willebrand factor	12726	p.ARG2535TER	von Willebrand disease type 3(ClinVar)	von Willebrand disease type 3	C1264041	F8VWF|VWD	12726	I3L4K4:P04275:Q8TCE8	NP_000543.2
Core matrisome	ECM Glycoproteins	VWF	von Willebrand factor	12726	p.ARG760HIS	von Willebrand disease type 1(ClinVar)	von Willebrand disease type 1	C1264039	F8VWF|VWD	12726	I3L4K4:P04275:Q8TCE8	NP_000543.2
Core matrisome	ECM Glycoproteins	VWF	von Willebrand factor	12726	p.ARG816TRP	von Willebrand disease type 2N(ClinVar)	VWD2	C1264040	F8VWF|VWD	12726	I3L4K4:P04275:Q8TCE8	NP_000543.2
Core matrisome	ECM Glycoproteins	VWF	von Willebrand factor	12726	p.ARG854GLN	von Willebrand disease type 2N|von Willebrand disease type 1(ClinVar)	VWD2	C1264040	F8VWF|VWD	12726	I3L4K4:P04275:Q8TCE8	NP_000543.2
Core matrisome	ECM Glycoproteins	VWF	von Willebrand factor	12726	p.ASN528SER	von Willebrand disease\x2c type 2a(ClinVar)	VWD2	C1264040	F8VWF|VWD	12726	I3L4K4:P04275:Q8TCE8	NP_000543.2
Core matrisome	ECM Glycoproteins	VWF	von Willebrand factor	12726	p.CYS1060ARG	von Willebrand disease type 2N(ClinVar)	VWD2	C1264040	F8VWF|VWD	12726	I3L4K4:P04275:Q8TCE8	NP_000543.2
Core matrisome	ECM Glycoproteins	VWF	von Willebrand factor	12726	p.CYS1149ARG	von Willebrand disease type 1(ClinVar)	von Willebrand disease type 1	C1264039	F8VWF|VWD	12726	I3L4K4:P04275:Q8TCE8	NP_000543.2
Core matrisome	ECM Glycoproteins	VWF	von Willebrand factor	12726	p.CYS1272GLY	.,von Willebrand disease\x2c type 2a(ClinVar)	von Willebrand disease, type 2a	C1282968	F8VWF|VWD	12726	I3L4K4:P04275:Q8TCE8	NP_000543.2
Core matrisome	ECM Glycoproteins	VWF	von Willebrand factor	12726	p.CYS2362PHE	von Willebrand disease type 3(ClinVar)	von Willebrand disease type 3	C1264041	F8VWF|VWD	12726	I3L4K4:P04275:Q8TCE8	NP_000543.2
Core matrisome	ECM Glycoproteins	VWF	von Willebrand factor	12726	p.CYS2773ARG	von Willebrand disease\x2c type 2a(ClinVar)	VWD2	C1264040	F8VWF|VWD	12726	I3L4K4:P04275:Q8TCE8	NP_000543.2
Core matrisome	ECM Glycoproteins	VWF	von Willebrand factor	12726	p.CYS804PHE	von Willebrand disease type 2N(ClinVar)	von Willebrand disease type 2N	C1282975	F8VWF|VWD	12726	I3L4K4:P04275:Q8TCE8	NP_000543.2
Core matrisome	ECM Glycoproteins	VWF	von Willebrand factor	12726	p.GLY1324SER	von Willebrand disease type 2M(ClinVar)	VWD2	C1264040	F8VWF|VWD	12726	I3L4K4:P04275:Q8TCE8	NP_000543.2
Core matrisome	ECM Glycoproteins	VWF	von Willebrand factor	12726	p.GLY550ARG	von Willebrand disease\x2c type 2a(ClinVar)	VWD2	C1264040	F8VWF|VWD	12726	I3L4K4:P04275:Q8TCE8	NP_000543.2
Core matrisome	ECM Glycoproteins	VWF	von Willebrand factor	12726	p.ILE1628THR	von Willebrand disease\x2c type 2a(ClinVar)	VWD2	C1264040	F8VWF|VWD	12726	I3L4K4:P04275:Q8TCE8	NP_000543.2
Core matrisome	ECM Glycoproteins	VWF	von Willebrand factor	12726	p.PHE1514CYS	von Willebrand disease\x2c type 2a(ClinVar)	VWD2	C1264040	F8VWF|VWD	12726	I3L4K4:P04275:Q8TCE8	NP_000543.2
Core matrisome	ECM Glycoproteins	VWF	von Willebrand factor	12726	p.PRO1266LEU	von Willebrand disease\x2c type 2b,.(ClinVar)	VWD2	C1264040	F8VWF|VWD	12726	I3L4K4:P04275:Q8TCE8	NP_000543.2
Core matrisome	ECM Glycoproteins	VWF	von Willebrand factor	12726	p.SER1285PHE	von Willebrand disease type 2M(ClinVar)	von Willebrand disease type 2M	C1282974	F8VWF|VWD	12726	I3L4K4:P04275:Q8TCE8	NP_000543.2
Core matrisome	ECM Glycoproteins	VWF	von Willebrand factor	12726	p.SER1613PRO	von Willebrand disease\x2c type 2a(ClinVar)	VWD2	C1264040	F8VWF|VWD	12726	I3L4K4:P04275:Q8TCE8	NP_000543.2
Core matrisome	ECM Glycoproteins	VWF	von Willebrand factor	12726	p.SER1783ALA	von Willebrand disease type 2(ClinVar)	von Willebrand disease type 2	C1264040	F8VWF|VWD	12726	I3L4K4:P04275:Q8TCE8	NP_000543.2
Core matrisome	ECM Glycoproteins	VWF	von Willebrand factor	12726	p.THR791MET	von Willebrand disease type 2N(ClinVar)	VWD2	C1264040	F8VWF|VWD	12726	I3L4K4:P04275:Q8TCE8	NP_000543.2
Core matrisome	ECM Glycoproteins	VWF	von Willebrand factor	12726	p.TRP1313CYS	von Willebrand disease\x2c type 2b(ClinVar)	VWD2	C1264040	F8VWF|VWD	12726	I3L4K4:P04275:Q8TCE8	NP_000543.2
Core matrisome	ECM Glycoproteins	VWF	von Willebrand factor	12726	p.TYR1146CYS	von Willebrand disease type 2(ClinVar)	von Willebrand disease type 2	C1264040	F8VWF|VWD	12726	I3L4K4:P04275:Q8TCE8	NP_000543.2
Core matrisome	ECM Glycoproteins	VWF	von Willebrand factor	12726	p.TYR1584CYS	von Willebrand disease\x2c type 1\x2c susceptibility to(ClinVar)	von Willebrand disease, type 1, susceptibility to	C4017296	F8VWF|VWD	12726	I3L4K4:P04275:Q8TCE8	NP_000543.2
Core matrisome	ECM Glycoproteins	VWF	von Willebrand factor	12726	p.TYR357TER	von Willebrand disease type 2N(ClinVar)	von Willebrand disease type 2N	C1282975	F8VWF|VWD	12726	I3L4K4:P04275:Q8TCE8	NP_000543.2
Core matrisome	ECM Glycoproteins	VWF	von Willebrand factor	12726	p.TYR795CYS	von Willebrand disease type 2N(ClinVar)	von Willebrand disease type 2N	C1282975	F8VWF|VWD	12726	I3L4K4:P04275:Q8TCE8	NP_000543.2
Core matrisome	ECM Glycoproteins	VWF	von Willebrand factor	12726	p.VAL1314PHE	.,von Willebrand disease\x2c type 2b(ClinVar)	von Willebrand disease, type 2b	C1282971	F8VWF|VWD	12726	I3L4K4:P04275:Q8TCE8	NP_000543.2
Core matrisome	ECM Glycoproteins	VWF	von Willebrand factor	12726	p.VAL1316MET	von Willebrand disease\x2c type 2b(ClinVar)	VWD2	C1264040	F8VWF|VWD	12726	I3L4K4:P04275:Q8TCE8	NP_000543.2
Core matrisome	ECM Glycoproteins	VWF	von Willebrand factor	12726	p.VAL1607ASP	von Willebrand disease\x2c type 2a(ClinVar)	VWD2	C1264040	F8VWF|VWD	12726	I3L4K4:P04275:Q8TCE8	NP_000543.2
Core matrisome	ECM Glycoproteins	WISP3	WNT1 inducible signaling pathway protein 3	12771	p.CYS145TYR	Progressive pseudorheumatoid dysplasia(ClinVar)	ARTHROPATHY, PROGRESSIVE PSEUDORHEUMATOID, OF CHILDHOOD	C0432215	CCN6|LIBC|MGC125987|MGC125988|MGC125989|PPAC|PPD	12771	F8WC24:G3V0J1:O95389:O95958:Q3T1A9	NP_003871.1:NP_937882.1:XP_005267252.1
Core matrisome	ECM Glycoproteins	WISP3	WNT1 inducible signaling pathway protein 3	12771	p.CYS52TER	Progressive pseudorheumatoid dysplasia(ClinVar)	ARTHROPATHY, PROGRESSIVE PSEUDORHEUMATOID, OF CHILDHOOD	C0432215	CCN6|LIBC|MGC125987|MGC125988|MGC125989|PPAC|PPD	12771	F8WC24:G3V0J1:O95389:O95958:Q3T1A9	NP_003871.1:NP_937882.1:XP_005267252.1
Core matrisome	ECM Glycoproteins	WISP3	WNT1 inducible signaling pathway protein 3	12771	p.CYS78ARG	Progressive pseudorheumatoid dysplasia(ClinVar)	ARTHROPATHY, PROGRESSIVE PSEUDORHEUMATOID, OF CHILDHOOD	C0432215	CCN6|LIBC|MGC125987|MGC125988|MGC125989|PPAC|PPD	12771	F8WC24:G3V0J1:O95389:O95958:Q3T1A9	NP_003871.1:NP_937882.1:XP_005267252.1
Core matrisome	ECM Glycoproteins	WISP3	WNT1 inducible signaling pathway protein 3	12771	p.SER334PRO	Progressive pseudorheumatoid dysplasia(ClinVar)	Progressive pseudorheumatoid dysplasia	C0432215	CCN6|LIBC|MGC125987|MGC125988|MGC125989|PPAC|PPD	12771	F8WC24:G3V0J1:O95389:O95958:Q3T1A9	NP_003871.1:NP_937882.1:XP_005267252.1
Core matrisome	ECM Glycoproteins	WISP3	WNT1 inducible signaling pathway protein 3	12771	p.TRP331TER	Progressive pseudorheumatoid dysplasia(ClinVar)	ARTHROPATHY, PROGRESSIVE PSEUDORHEUMATOID, OF CHILDHOOD	C0432215	CCN6|LIBC|MGC125987|MGC125988|MGC125989|PPAC|PPD	12771	F8WC24:G3V0J1:O95389:O95958:Q3T1A9	NP_003871.1:NP_937882.1:XP_005267252.1
Core matrisome	Proteoglycans	ACAN	aggrecan	319	p.ASP2381ASN	Spondyloepimetaphyseal dysplasia\x2c Aggrecan type(ClinVar)	Spondyloepimetaphyseal dysplasia	C0432211	AGC1|AGCAN|CSPG1|CSPGCP|MSK16|SEDK	319	E7ENV9:E7EX88:H0YK70:H0YM81:H0YMF1:P16112:Q6PID9	NP_001126.3:NP_037359.3
Core matrisome	Proteoglycans	HSPG2	heparan sulfate proteoglycan 2	5273	p.CYS1532TYR	Schwartz Jampel syndrome type 1(ClinVar)	Schwartz Jampel syndrome type 1	C0036391	PLC|PRCAN|SJA|SJS|SJS1	5273	H0Y5A9:H7BYA5:H7C4A6:P98160:Q5SZI5:Q5SZI9:Q5SZJ1:Q5SZJ2	NP_001278789.1:NP_005520.4
Core matrisome	Proteoglycans	IMPG2	interphotoreceptor matrix proteoglycan 2	18362	p.ARG906TER	Retinitis pigmentosa 56(ClinVar)	RETINITIS PIGMENTOSA 56	C3150819	IPM200|SPACRCAN	18362	Q9BZV3	NP_057331.2
Core matrisome	Proteoglycans	IMPG2	interphotoreceptor matrix proteoglycan 2	18362	p.ARG964TER	Retinitis pigmentosa 56(ClinVar)	RETINITIS PIGMENTOSA 56	C3150819	IPM200|SPACRCAN	18362	Q9BZV3	NP_057331.2
Core matrisome	Proteoglycans	IMPG2	interphotoreceptor matrix proteoglycan 2	18362	p.SER212TER	Retinitis pigmentosa 56(ClinVar)	RETINITIS PIGMENTOSA 56	C3150819	IPM200|SPACRCAN	18362	Q9BZV3	NP_057331.2
Core matrisome	Proteoglycans	NYX	nyctalopin	8082	p.ARG94PRO	Congenital stationary night blindness\x2c type 1A(ClinVar)	Congenital stationary night blindness, type 1A	C3495587	CLRP|CSNB1|CSNB4|MGC138447	8082	Q9GZU5	NP_072089.1:XP_005272689.1
Core matrisome	Proteoglycans	NYX	nyctalopin	8082	p.CYS35TER	Congenital stationary night blindness\x2c type 1A(ClinVar)	Congenital stationary night blindness, type 1A	C3495587	CLRP|CSNB1|CSNB4|MGC138447	8082	Q9GZU5	NP_072089.1:XP_005272689.1
Core matrisome	Proteoglycans	NYX	nyctalopin	8082	p.ILE101THR	Congenital stationary night blindness\x2c type 1A(ClinVar)	Congenital stationary night blindness, type 1A	C3495587	CLRP|CSNB1|CSNB4|MGC138447	8082	Q9GZU5	NP_072089.1:XP_005272689.1
Core matrisome	Proteoglycans	NYX	nyctalopin	8082	p.TRP350TER	Congenital stationary night blindness\x2c type 1A(ClinVar)	Congenital stationary night blindness, type 1A	C3495587	CLRP|CSNB1|CSNB4|MGC138447	8082	Q9GZU5	NP_072089.1:XP_005272689.1
Matrisome-associated	ECM Regulators	A2M	alpha-2-macroglobulin	7	p.ILE1000VAL	ALPHA-2-MACROGLOBULIN POLYMORPHISM|Alzheimer disease\x2c susceptibility to(ClinVar)	ALPHA-2-MACROGLOBULIN POLYMORPHISM	C4015778	CPAMD5|DKFZp779B086|FWP007|S863-7	7	F5H1E8:F8W7L3:H0YFH1:H0YGH6:P01023	NP_000005.2
Matrisome-associated	ECM Regulators	ADAM9	ADAM metallopeptidase domain 9 (meltrin gamma)	216	p.ARG164TER	Cone-rod dystrophy 9(ClinVar)	Cone-rod dystrophy	C0035334	CORD9|KIAA0021|MCMP|MDC9|Mltng	216	A0AVL1:C9J6H5:C9JPM3:F8WC54:Q13443	NP_003807.1
Matrisome-associated	ECM Regulators	ADAM9	ADAM metallopeptidase domain 9 (meltrin gamma)	216	p.ARG256TER	Cone-rod dystrophy 9(ClinVar)	Cone-rod dystrophy	C0035334	CORD9|KIAA0021|MCMP|MDC9|Mltng	216	A0AVL1:C9J6H5:C9JPM3:F8WC54:Q13443	NP_003807.1
Matrisome-associated	ECM Regulators	ADAMTS10	ADAM metallopeptidase with thrombospondin type 1 motif, 10	13201	p.ARG237TER	Weill-Marchesani syndrome 1(ClinVar)	Weill-Marchesani syndrome	C0265313	ADAM-TS10|WMS	13201	M0QY12:M0QY36:Q9H324	NP_001269281.1:NP_112219.3
Matrisome-associated	ECM Regulators	ADAMTS10	ADAM metallopeptidase with thrombospondin type 1 motif, 10	13201	p.GLN318TER	Weill-Marchesani syndrome 1(ClinVar)	Weill-Marchesani syndrome	C0265313	ADAM-TS10|WMS	13201	M0QY12:M0QY36:Q9H324	NP_001269281.1:NP_112219.3
Matrisome-associated	ECM Regulators	ADAMTS10	ADAM metallopeptidase with thrombospondin type 1 motif, 10	13201	p.GLY518ASP	Weill-Marchesani syndrome 1(ClinVar)	Weill-Marchesani syndrome	C0265313	ADAM-TS10|WMS	13201	M0QY12:M0QY36:Q9H324	NP_001269281.1:NP_112219.3
Matrisome-associated	ECM Regulators	ADAMTS10	ADAM metallopeptidase with thrombospondin type 1 motif, 10	13201	p.GLY700CYS	Weill-Marchesani syndrome 1(ClinVar)	Weill-Marchesani syndrome	C0265313	ADAM-TS10|WMS	13201	M0QY12:M0QY36:Q9H324	NP_001269281.1:NP_112219.3
Matrisome-associated	ECM Regulators	ADAMTS13	ADAM metallopeptidase with thrombospondin type 1 motif, 13	1366	p.ALA250VAL	Upshaw-Schulman syndrome(ClinVar)	Thrombotic thrombocytopaenic purpura	C0034155	C9orf8|DKFZp434C2322|FLJ42993|MGC118899|MGC118900|	1366	E7EV88:Q76LX8:Q9UGQ1	NP_620594.1:NP_620595.1:NP_620596.2
Matrisome-associated	ECM Regulators	ADAMTS13	ADAM metallopeptidase with thrombospondin type 1 motif, 13	1366	p.ARG102CYS	Upshaw-Schulman syndrome(ClinVar)	Thrombotic thrombocytopaenic purpura	C0034155	C9orf8|DKFZp434C2322|FLJ42993|MGC118899|MGC118900|	1366	E7EV88:Q76LX8:Q9UGQ1	NP_620594.1:NP_620595.1:NP_620596.2
Matrisome-associated	ECM Regulators	ADAMTS13	ADAM metallopeptidase with thrombospondin type 1 motif, 13	1366	p.ARG268PRO	Upshaw-Schulman syndrome(ClinVar)	Thrombotic thrombocytopaenic purpura	C0034155	C9orf8|DKFZp434C2322|FLJ42993|MGC118899|MGC118900|	1366	E7EV88:Q76LX8:Q9UGQ1	NP_620594.1:NP_620595.1:NP_620596.2
Matrisome-associated	ECM Regulators	ADAMTS13	ADAM metallopeptidase with thrombospondin type 1 motif, 13	1366	p.ARG398HIS	Upshaw-Schulman syndrome(ClinVar)	Thrombotic thrombocytopaenic purpura	C0034155	C9orf8|DKFZp434C2322|FLJ42993|MGC118899|MGC118900|	1366	E7EV88:Q76LX8:Q9UGQ1	NP_620594.1:NP_620595.1:NP_620596.2
Matrisome-associated	ECM Regulators	ADAMTS13	ADAM metallopeptidase with thrombospondin type 1 motif, 13	1366	p.ARG528GLY	Upshaw-Schulman syndrome(ClinVar)	Thrombotic thrombocytopaenic purpura	C0034155	C9orf8|DKFZp434C2322|FLJ42993|MGC118899|MGC118900|	1366	E7EV88:Q76LX8:Q9UGQ1	NP_620594.1:NP_620595.1:NP_620596.2
Matrisome-associated	ECM Regulators	ADAMTS13	ADAM metallopeptidase with thrombospondin type 1 motif, 13	1366	p.ARG692CYS	Upshaw-Schulman syndrome(ClinVar)	Thrombotic thrombocytopaenic purpura	C0034155	C9orf8|DKFZp434C2322|FLJ42993|MGC118899|MGC118900|	1366	E7EV88:Q76LX8:Q9UGQ1	NP_620594.1:NP_620595.1:NP_620596.2
Matrisome-associated	ECM Regulators	ADAMTS13	ADAM metallopeptidase with thrombospondin type 1 motif, 13	1366	p.CYS1024GLY	Upshaw-Schulman syndrome(ClinVar)	Thrombotic thrombocytopaenic purpura	C0034155	C9orf8|DKFZp434C2322|FLJ42993|MGC118899|MGC118900|	1366	E7EV88:Q76LX8:Q9UGQ1	NP_620594.1:NP_620595.1:NP_620596.2
Matrisome-associated	ECM Regulators	ADAMTS13	ADAM metallopeptidase with thrombospondin type 1 motif, 13	1366	p.CYS1213TYR	Upshaw-Schulman syndrome(ClinVar)	Thrombotic thrombocytopaenic purpura	C0034155	C9orf8|DKFZp434C2322|FLJ42993|MGC118899|MGC118900|	1366	E7EV88:Q76LX8:Q9UGQ1	NP_620594.1:NP_620595.1:NP_620596.2
Matrisome-associated	ECM Regulators	ADAMTS13	ADAM metallopeptidase with thrombospondin type 1 motif, 13	1366	p.CYS951GLY	Upshaw-Schulman syndrome(ClinVar)	Thrombotic thrombocytopaenic purpura	C0034155	C9orf8|DKFZp434C2322|FLJ42993|MGC118899|MGC118900|	1366	E7EV88:Q76LX8:Q9UGQ1	NP_620594.1:NP_620595.1:NP_620596.2
Matrisome-associated	ECM Regulators	ADAMTS13	ADAM metallopeptidase with thrombospondin type 1 motif, 13	1366	p.GLN448GLU	Upshaw-Schulman syndrome(ClinVar)	THROMBOTIC THROMBOCYTOPENIC PURPURA, CONGENITAL	C1268935	C9orf8|DKFZp434C2322|FLJ42993|MGC118899|MGC118900|	1366	E7EV88:Q76LX8:Q9UGQ1	NP_620594.1:NP_620595.1:NP_620596.2
Matrisome-associated	ECM Regulators	ADAMTS13	ADAM metallopeptidase with thrombospondin type 1 motif, 13	1366	p.GLN449TER	Upshaw-Schulman syndrome(ClinVar)	Thrombotic thrombocytopaenic purpura	C0034155	C9orf8|DKFZp434C2322|FLJ42993|MGC118899|MGC118900|	1366	E7EV88:Q76LX8:Q9UGQ1	NP_620594.1:NP_620595.1:NP_620596.2
Matrisome-associated	ECM Regulators	ADAMTS13	ADAM metallopeptidase with thrombospondin type 1 motif, 13	1366	p.HIS96ASP	Upshaw-Schulman syndrome(ClinVar)	Thrombotic thrombocytopaenic purpura	C0034155	C9orf8|DKFZp434C2322|FLJ42993|MGC118899|MGC118900|	1366	E7EV88:Q76LX8:Q9UGQ1	NP_620594.1:NP_620595.1:NP_620596.2
Matrisome-associated	ECM Regulators	ADAMTS13	ADAM metallopeptidase with thrombospondin type 1 motif, 13	1366	p.PRO475SER	Upshaw-Schulman syndrome(ClinVar)	THROMBOTIC THROMBOCYTOPENIC PURPURA, CONGENITAL	C1268935	C9orf8|DKFZp434C2322|FLJ42993|MGC118899|MGC118900|	1366	E7EV88:Q76LX8:Q9UGQ1	NP_620594.1:NP_620595.1:NP_620596.2
Matrisome-associated	ECM Regulators	ADAMTS13	ADAM metallopeptidase with thrombospondin type 1 motif, 13	1366	p.THR196ILE	Upshaw-Schulman syndrome(ClinVar)	Thrombotic thrombocytopaenic purpura	C0034155	C9orf8|DKFZp434C2322|FLJ42993|MGC118899|MGC118900|	1366	E7EV88:Q76LX8:Q9UGQ1	NP_620594.1:NP_620595.1:NP_620596.2
Matrisome-associated	ECM Regulators	ADAMTS2	ADAM metallopeptidase with thrombospondin type 1 motif, 2	218	p.GLN225TER	Ehlers-Danlos syndrome\x2c type 7C(ClinVar)	Ehlers-Danlos syndrome, type VIIC	C3508775	ADAM-TS2|ADAMTS-3|NPI|PCINP|PCPNI|hPCPNI	218	O95450	NP_055059.2:NP_067610.1
Matrisome-associated	ECM Regulators	ADAMTS2	ADAM metallopeptidase with thrombospondin type 1 motif, 2	218	p.TRP795TER	Ehlers-Danlos syndrome\x2c type 7C(ClinVar)	Ehlers-Danlos syndrome, type VIIC	C3508775	ADAM-TS2|ADAMTS-3|NPI|PCINP|PCPNI|hPCPNI	218	O95450	NP_055059.2:NP_067610.1
Matrisome-associated	ECM Regulators	ADAMTSL4	ADAMTS-like 4	19706	p.TYR595TER	Ectopia lentis\x2c isolated autosomal recessive(ClinVar)	ECTOPIA LENTIS 2, ISOLATED, AUTOSOMAL RECESSIVE	C3541474	TSRC1	19706	F8WAD0:Q6UY14	NP_001275536.1:NP_001275537.1:NP_061905.2:NP_079284.2:NP_001275537.1
Matrisome-associated	ECM Regulators	AGT	angiotensinogen (serpin peptidase inhibitor, clade A, member 8)	333	p.ARG375GLN	Renal dysplasia(ClinVar)	Renal dysplasia	C0235831;C3536714	ANHU|FLJ92595|FLJ97926|SERPINA8	333	P01019	NP_000020.1
Matrisome-associated	ECM Regulators	AGT	angiotensinogen (serpin peptidase inhibitor, clade A, member 8)	333	p.GLN202TER	Renal dysplasia(ClinVar)	Renal dysplasia	C0235831;C3536714	ANHU|FLJ92595|FLJ97926|SERPINA8	333	P01019	NP_000020.1
Matrisome-associated	ECM Regulators	AGT	angiotensinogen (serpin peptidase inhibitor, clade A, member 8)	333	p.MET10LEU	Essential hypertension(ClinVar)	Essential hypertension	C0085580	ANHU|FLJ92595|FLJ97926|SERPINA8	333	P01019	NP_000020.1
Matrisome-associated	ECM Regulators	AGT	angiotensinogen (serpin peptidase inhibitor, clade A, member 8)	333	p.MET268THR	Hypertension\x2c essential\x2c susceptibility to|Preeclampsia\x2c susceptibility to|Susceptibility to progression to renal failure in IgA nephropathy(ClinVar)	Hypertension	C0020538;C1963138	ANHU|FLJ92595|FLJ97926|SERPINA8	333	P01019	NP_000020.1
Matrisome-associated	ECM Regulators	CST3	cystatin C	2475	p.ALA25THR	Age-related macular degeneration 11(ClinVar)	Age-related macular degeneration 11	C2677774	ARMD11|MGC117328	2475	P01034	NP_000090.1:NP_001275543.1
Matrisome-associated	ECM Regulators	CST3	cystatin C	2475	p.LEU94GLN	Hereditary cerebral amyloid angiopathy\x2c Icelandic type(ClinVar)	Hereditary cerebral amyloid angiopathy, Icelandic type	C1527338	ARMD11|MGC117328	2475	P01034	NP_000090.1:NP_001275543.1
Matrisome-associated	ECM Regulators	CSTB	cystatin B (stefin B)	2482	p.ARG68TER	Unverricht-Lundborg syndrome(ClinVar)	Epilepsy, progressive myoclonus	C0751778	CST6|EPM1|PME|STFB	2482	P04080	NP_000091.1
Matrisome-associated	ECM Regulators	CSTB	cystatin B (stefin B)	2482	p.GLN71PRO	Myclonic epilepsy of unverricht and lundborg(ClinVar)	Epilepsy, progressive myoclonus	C0751778	CST6|EPM1|PME|STFB	2482	P04080	NP_000091.1
Matrisome-associated	ECM Regulators	CSTB	cystatin B (stefin B)	2482	p.GLY4ARG	Unverricht-Lundborg syndrome(ClinVar)	Epilepsy, progressive myoclonus	C0751778	CST6|EPM1|PME|STFB	2482	P04080	NP_000091.1
Matrisome-associated	ECM Regulators	CTSA	cathepsin A	9251	p.GLN49ARG	Combined deficiency of sialidase AND beta galactosidase(ClinVar)	Combined deficiency of sialidase AND beta galactosidase	C0268233	GLB2|GSL|NGBE|PPCA|PPGB	9251	P10619:Q5JZG9:Q5JZH0:U3KQ41:U3KQF1:U3KQU6:X6R5C5:X6R8A1	NP_000299.2:NP_000299.2:NP_001121167.1:NP_001161066.1:NP_001161066.1
Matrisome-associated	ECM Regulators	CTSA	cathepsin A	9251	p.GLY439SER	Galactosialidosis\x2c early infantile(ClinVar)	Galactosialidosis (GSL)	C0268233	GLB2|GSL|NGBE|PPCA|PPGB	9251	P10619:Q5JZG9:Q5JZH0:U3KQ41:U3KQF1:U3KQU6:X6R5C5:X6R8A1	NP_000299.2:NP_000299.2:NP_001121167.1:NP_001161066.1:NP_001161066.1
Matrisome-associated	ECM Regulators	CTSA	cathepsin A	9251	p.LEU236PRO	Galactosialidosis\x2c early infantile(ClinVar)	Galactosialidosis (GSL)	C0268233	GLB2|GSL|NGBE|PPCA|PPGB	9251	P10619:Q5JZG9:Q5JZH0:U3KQ41:U3KQF1:U3KQU6:X6R5C5:X6R8A1	NP_000299.2:NP_000299.2:NP_001121167.1:NP_001161066.1:NP_001161066.1
Matrisome-associated	ECM Regulators	CTSA	cathepsin A	9251	p.LYS453GLU	Galactosialidosis\x2c late infantile(ClinVar)	Galactosialidosis (GSL)	C0268233	GLB2|GSL|NGBE|PPCA|PPGB	9251	P10619:Q5JZG9:Q5JZH0:U3KQ41:U3KQF1:U3KQU6:X6R5C5:X6R8A1	NP_000299.2:NP_000299.2:NP_001121167.1:NP_001161066.1:NP_001161066.1
Matrisome-associated	ECM Regulators	CTSA	cathepsin A	9251	p.MET406THR	Galactosialidosis\x2c late infantile(ClinVar)	Galactosialidosis (GSL)	C0268233	GLB2|GSL|NGBE|PPCA|PPGB	9251	P10619:Q5JZG9:Q5JZH0:U3KQ41:U3KQF1:U3KQU6:X6R5C5:X6R8A1	NP_000299.2:NP_000299.2:NP_001121167.1:NP_001161066.1:NP_001161066.1
Matrisome-associated	ECM Regulators	CTSA	cathepsin A	9251	p.PHE440VAL	Galactosialidosis\x2c late infantile(ClinVar)	Galactosialidosis (GSL)	C0268233	GLB2|GSL|NGBE|PPCA|PPGB	9251	P10619:Q5JZG9:Q5JZH0:U3KQ41:U3KQF1:U3KQU6:X6R5C5:X6R8A1	NP_000299.2:NP_000299.2:NP_001121167.1:NP_001161066.1:NP_001161066.1
Matrisome-associated	ECM Regulators	CTSA	cathepsin A	9251	p.SER90LEU	Combined deficiency of sialidase AND beta galactosidase(ClinVar)	Combined deficiency of sialidase AND beta galactosidase	C0268233	GLB2|GSL|NGBE|PPCA|PPGB	9251	P10619:Q5JZG9:Q5JZH0:U3KQ41:U3KQF1:U3KQU6:X6R5C5:X6R8A1	NP_000299.2:NP_000299.2:NP_001121167.1:NP_001161066.1:NP_001161066.1
Matrisome-associated	ECM Regulators	CTSA	cathepsin A	9251	p.TRP65ARG	Combined deficiency of sialidase AND beta galactosidase(ClinVar)	Combined deficiency of sialidase AND beta galactosidase	C0268233	GLB2|GSL|NGBE|PPCA|PPGB	9251	P10619:Q5JZG9:Q5JZH0:U3KQ41:U3KQF1:U3KQU6:X6R5C5:X6R8A1	NP_000299.2:NP_000299.2:NP_001121167.1:NP_001161066.1:NP_001161066.1
Matrisome-associated	ECM Regulators	CTSA	cathepsin A	9251	p.TYR249ASN	Combined deficiency of sialidase AND beta galactosidase(ClinVar)	Combined deficiency of sialidase AND beta galactosidase	C0268233	GLB2|GSL|NGBE|PPCA|PPGB	9251	P10619:Q5JZG9:Q5JZH0:U3KQ41:U3KQF1:U3KQU6:X6R5C5:X6R8A1	NP_000299.2:NP_000299.2:NP_001121167.1:NP_001161066.1:NP_001161066.1
Matrisome-associated	ECM Regulators	CTSA	cathepsin A	9251	p.TYR395CYS	Combined deficiency of sialidase AND beta galactosidase(ClinVar)	Combined deficiency of sialidase AND beta galactosidase	C0268233	GLB2|GSL|NGBE|PPCA|PPGB	9251	P10619:Q5JZG9:Q5JZH0:U3KQ41:U3KQF1:U3KQU6:X6R5C5:X6R8A1	NP_000299.2:NP_000299.2:NP_001121167.1:NP_001161066.1:NP_001161066.1
Matrisome-associated	ECM Regulators	CTSA	cathepsin A	9251	p.VAL132MET	Galactosialidosis\x2c early infantile(ClinVar)	Galactosialidosis (GSL)	C0268233	GLB2|GSL|NGBE|PPCA|PPGB	9251	P10619:Q5JZG9:Q5JZH0:U3KQ41:U3KQF1:U3KQU6:X6R5C5:X6R8A1	NP_000299.2:NP_000299.2:NP_001121167.1:NP_001161066.1:NP_001161066.1
Matrisome-associated	ECM Regulators	CTSC	cathepsin C	2528	p.ARG210TER	Papillon-LefËvre syndrome(ClinVar)	Papillon-Lefevre syndrome	C0030360	CPPI|DPP1|DPPI|HMS|JP|JPD|PALS|PLS	2528	H0YCY8:H0YDA2:P53634	NP_001107645.1:NP_001805.3:NP_680475.1
Matrisome-associated	ECM Regulators	CTSC	cathepsin C	2528	p.GLN252LEU	Papillon-LefËvre syndrome(ClinVar)	Papillon-Lefevre syndrome	C0030360	CPPI|DPP1|DPPI|HMS|JP|JPD|PALS|PLS	2528	H0YCY8:H0YDA2:P53634	NP_001107645.1:NP_001805.3:NP_680475.1
Matrisome-associated	ECM Regulators	CTSC	cathepsin C	2528	p.GLN286TER	Papillon-LefËvre syndrome(ClinVar)	Papillon-Lefevre syndrome	C0030360	CPPI|DPP1|DPPI|HMS|JP|JPD|PALS|PLS	2528	H0YCY8:H0YDA2:P53634	NP_001107645.1:NP_001805.3:NP_680475.1
Matrisome-associated	ECM Regulators	CTSC	cathepsin C	2528	p.GLY301SER	Papillon-LefËvre syndrome(ClinVar)	Papillon-Lefevre syndrome	C0030360	CPPI|DPP1|DPPI|HMS|JP|JPD|PALS|PLS	2528	H0YCY8:H0YDA2:P53634	NP_001107645.1:NP_001805.3:NP_680475.1
Matrisome-associated	ECM Regulators	CTSC	cathepsin C	2528	p.HIS127PRO	Papillon-LefËvre syndrome(ClinVar)	Papillon-Lefevre syndrome	C0030360	CPPI|DPP1|DPPI|HMS|JP|JPD|PALS|PLS	2528	H0YCY8:H0YDA2:P53634	NP_001107645.1:NP_001805.3:NP_680475.1
Matrisome-associated	ECM Regulators	CTSC	cathepsin C	2528	p.LEU68ARG	Papillon-LefËvre syndrome(ClinVar)	Papillon-Lefevre syndrome	C0030360	CPPI|DPP1|DPPI|HMS|JP|JPD|PALS|PLS	2528	H0YCY8:H0YDA2:P53634	NP_001107645.1:NP_001805.3:NP_680475.1
Matrisome-associated	ECM Regulators	CTSC	cathepsin C	2528	p.TRP39SER	Papillon-LefËvre syndrome(ClinVar)	Papillon-Lefevre syndrome	C0030360	CPPI|DPP1|DPPI|HMS|JP|JPD|PALS|PLS	2528	H0YCY8:H0YDA2:P53634	NP_001107645.1:NP_001805.3:NP_680475.1
Matrisome-associated	ECM Regulators	CTSC	cathepsin C	2528	p.TRP429CYS	Papillon-LefËvre syndrome(ClinVar)	Papillon-Lefevre syndrome	C0030360	CPPI|DPP1|DPPI|HMS|JP|JPD|PALS|PLS	2528	H0YCY8:H0YDA2:P53634	NP_001107645.1:NP_001805.3:NP_680475.1
Matrisome-associated	ECM Regulators	CTSC	cathepsin C	2528	p.TYR347CYS	Periodontitis\x2c aggressive\x2c 1(ClinVar)	AP1	C0085828;C0162508;C3271456;C3536909	CPPI|DPP1|DPPI|HMS|JP|JPD|PALS|PLS	2528	H0YCY8:H0YDA2:P53634	NP_001107645.1:NP_001805.3:NP_680475.1
Matrisome-associated	ECM Regulators	CTSC	cathepsin C	2528	p.TYR412CYS	Periodontitis\x2c aggressive\x2c 1(ClinVar)	AP1	C0085828;C0162508;C3271456;C3536909	CPPI|DPP1|DPPI|HMS|JP|JPD|PALS|PLS	2528	H0YCY8:H0YDA2:P53634	NP_001107645.1:NP_001805.3:NP_680475.1
Matrisome-associated	ECM Regulators	CTSD	cathepsin D	2529	p.PHE229ILE	Ceroid lipofuscinosis neuronal 10(ClinVar)	Ceroid lipofuscinosis neuronal 10	C1332805;C1864669	CLN10|CPSD|MGC2311	2529	C9JH19:F8W787:F8WD96:H7C1V0:P07339	NP_001900.1
Matrisome-associated	ECM Regulators	CTSD	cathepsin D	2529	p.TRP383CYS	Ceroid lipofuscinosis neuronal 10(ClinVar)	Ceroid lipofuscinosis neuronal 10	C1332805;C1864669	CLN10|CPSD|MGC2311	2529	C9JH19:F8W787:F8WD96:H7C1V0:P07339	NP_001900.1
Matrisome-associated	ECM Regulators	CTSK	cathepsin K	2536	p.ALA277VAL	Pyknodysostosis(ClinVar)	PYCNODYSOSTOSIS	C0238402	CTS02|CTSO|CTSO1|CTSO2|MGC23107|PKND|PYCD	2536	P43235:Q5QP40	NP_000387.1
Matrisome-associated	ECM Regulators	CTSK	cathepsin K	2536	p.ARG241TER	Pyknodysostosis(ClinVar)	PYCNODYSOSTOSIS	C0238402	CTS02|CTSO|CTSO1|CTSO2|MGC23107|PKND|PYCD	2536	P43235:Q5QP40	NP_000387.1
Matrisome-associated	ECM Regulators	CTSK	cathepsin K	2536	p.GLY146ARG	Pyknodysostosis(ClinVar)	PYCNODYSOSTOSIS	C0238402	CTS02|CTSO|CTSO1|CTSO2|MGC23107|PKND|PYCD	2536	P43235:Q5QP40	NP_000387.1
Matrisome-associated	ECM Regulators	CTSK	cathepsin K	2536	p.GLY79GLU	Pyknodysostosis(ClinVar)	PYCNODYSOSTOSIS	C0238402	CTS02|CTSO|CTSO1|CTSO2|MGC23107|PKND|PYCD	2536	P43235:Q5QP40	NP_000387.1
Matrisome-associated	ECM Regulators	CTSK	cathepsin K	2536	p.LEU309PRO	Pyknodysostosis(ClinVar)	PYCNODYSOSTOSIS	C0238402	CTS02|CTSO|CTSO1|CTSO2|MGC23107|PKND|PYCD	2536	P43235:Q5QP40	NP_000387.1
Matrisome-associated	ECM Regulators	CTSK	cathepsin K	2536	p.LYS52TER	Pyknodysostosis(ClinVar)	PYCNODYSOSTOSIS	C0238402	CTS02|CTSO|CTSO1|CTSO2|MGC23107|PKND|PYCD	2536	P43235:Q5QP40	NP_000387.1
Matrisome-associated	ECM Regulators	CTSK	cathepsin K	2536	p.TER330TRP	Pyknodysostosis(ClinVar)	PYCNODYSOSTOSIS	C0238402	CTS02|CTSO|CTSO1|CTSO2|MGC23107|PKND|PYCD	2536	P43235:Q5QP40	NP_000387.1
Matrisome-associated	ECM Regulators	EGLN1	egl nine homolog 1 (C. elegans)	1232	p.ARG371HIS	Erythrocytosis\x2c familial\x2c 3(ClinVar)	Erythrocytosis	C1527405	C1orf12|DKFZp761F179|ECYT3|HIFPH2|HPH2|PHD2|SM20|Z	1232	Q9GZT9	NP_071334.1
Matrisome-associated	ECM Regulators	EGLN1	egl nine homolog 1 (C. elegans)	1232	p.HIS374ARG	Erythrocytosis\x2c familial\x2c 3(ClinVar)	Erythrocytosis, familial, 3	C1853286	C1orf12|DKFZp761F179|ECYT3|HIFPH2|HPH2|PHD2|SM20|Z	1232	Q9GZT9	NP_071334.1
Matrisome-associated	ECM Regulators	ELANE	elastase, neutrophil expressed	3309	p.ALA61VAL	Cyclical neutropenia(ClinVar)	Cyclical neutropenia	C0221023	ELA2|GE|HLE|HNE|NE|PMN-E|SCN1	3309	P08246	NP_001963.1:XP_005259574.1:XP_006725460.1
Matrisome-associated	ECM Regulators	ELANE	elastase, neutrophil expressed	3309	p.ARG220GLN	Cyclical neutropenia(ClinVar)	Cyclical neutropenia	C0221023	ELA2|GE|HLE|HNE|NE|PMN-E|SCN1	3309	P08246	NP_001963.1:XP_005259574.1:XP_006725460.1
Matrisome-associated	ECM Regulators	ELANE	elastase, neutrophil expressed	3309	p.CYS71ARG	Severe congenital neutropenia autosomal dominant(ClinVar)	Neutropaenia, congenital	C0340970;C1853118	ELA2|GE|HLE|HNE|NE|PMN-E|SCN1	3309	P08246	NP_001963.1:XP_005259574.1:XP_006725460.1
Matrisome-associated	ECM Regulators	ELANE	elastase, neutrophil expressed	3309	p.GLY214ARG	Severe congenital neutropenia autosomal dominant(ClinVar)	Neutropaenia, congenital	C0340970;C1853118	ELA2|GE|HLE|HNE|NE|PMN-E|SCN1	3309	P08246	NP_001963.1:XP_005259574.1:XP_006725460.1
Matrisome-associated	ECM Regulators	ELANE	elastase, neutrophil expressed	3309	p.LEU206PHE	Cyclical neutropenia(ClinVar)	Cyclical neutropenia	C0221023	ELA2|GE|HLE|HNE|NE|PMN-E|SCN1	3309	P08246	NP_001963.1:XP_005259574.1:XP_006725460.1
Matrisome-associated	ECM Regulators	ELANE	elastase, neutrophil expressed	3309	p.PRO139LEU	Severe congenital neutropenia autosomal dominant(ClinVar)	Neutropaenia, congenital	C0340970;C1853118	ELA2|GE|HLE|HNE|NE|PMN-E|SCN1	3309	P08246	NP_001963.1:XP_005259574.1:XP_006725460.1
Matrisome-associated	ECM Regulators	ELANE	elastase, neutrophil expressed	3309	p.SER126LEU	Severe congenital neutropenia autosomal dominant(ClinVar)	Neutropaenia, congenital	C0340970;C1853118	ELA2|GE|HLE|HNE|NE|PMN-E|SCN1	3309	P08246	NP_001963.1:XP_005259574.1:XP_006725460.1
Matrisome-associated	ECM Regulators	ELANE	elastase, neutrophil expressed	3309	p.VAL101MET	.,Severe congenital neutropenia autosomal dominant(ClinVar)	Neutropaenia, congenital	C0340970;C1853118	ELA2|GE|HLE|HNE|NE|PMN-E|SCN1	3309	P08246	NP_001963.1:XP_005259574.1:XP_006725460.1
Matrisome-associated	ECM Regulators	F10	coagulation factor X	3528	p.ARG287TRP	Factor X deficiency(ClinVar)	Factor X deficiency	C0015519	FX|FXA	3528	B7ZBK1:F8WBM7:P00742:Q5JVE8	NP_000495.1:XP_005268355.1
Matrisome-associated	ECM Regulators	F12	coagulation factor XII (Hageman factor)	3530	p.ARG372PRO	FACTOR XII (LOCARNO)(ClinVar)	FACTOR XII (LOCARNO)	C4017222	HAE3|HAEX|HAF	3530	P00748	NP_000496.2
Matrisome-associated	ECM Regulators	F12	coagulation factor XII (Hageman factor)	3530	p.THR328ARG	Hereditary angioedema\x2c type III,Hereditary angioedema\x2c type III(ClinVar)	Angioedema, hereditary	C0019243;C1412922	HAE3|HAEX|HAF	3530	P00748	NP_000496.2
Matrisome-associated	ECM Regulators	F12	coagulation factor XII (Hageman factor)	3530	p.TYR53CYS	FACTOR XII (TENRI)(ClinVar)	FACTOR XII (TENRI)	C4017224	HAE3|HAEX|HAF	3530	P00748	NP_000496.2
Matrisome-associated	ECM Regulators	F13A1	coagulation factor XIII, A1 polypeptide	3531	p.ARG172TER	Factor xiii\x2c a subunit\x2c deficiency of(ClinVar)	Factor XIII deficiency	C0015530	F13A	3531	A6PVK5:H0Y4W5:H0Y796:P00488:Q9NQP5	NP_000120.2:XP_006715073.1
Matrisome-associated	ECM Regulators	F13A1	coagulation factor XIII, A1 polypeptide	3531	p.ARG261HIS	Factor xiii\x2c a subunit\x2c deficiency of(ClinVar)	Factor XIII deficiency	C0015530	F13A	3531	A6PVK5:H0Y4W5:H0Y796:P00488:Q9NQP5	NP_000120.2:XP_006715073.1
Matrisome-associated	ECM Regulators	F13A1	coagulation factor XIII, A1 polypeptide	3531	p.ARG327GLN	Factor xiii\x2c a subunit\x2c deficiency of(ClinVar)	Factor XIII deficiency	C0015530	F13A	3531	A6PVK5:H0Y4W5:H0Y796:P00488:Q9NQP5	NP_000120.2:XP_006715073.1
Matrisome-associated	ECM Regulators	F13A1	coagulation factor XIII, A1 polypeptide	3531	p.ARG662TER	Factor xiii\x2c a subunit\x2c deficiency of(ClinVar)	Factor XIII deficiency	C0015530	F13A	3531	A6PVK5:H0Y4W5:H0Y796:P00488:Q9NQP5	NP_000120.2:XP_006715073.1
Matrisome-associated	ECM Regulators	F13A1	coagulation factor XIII, A1 polypeptide	3531	p.ARG682HIS	Factor xiii\x2c a subunit\x2c deficiency of(ClinVar)	Factor XIII subunit A deficiency	C2750514	F13A	3531	A6PVK5:H0Y4W5:H0Y796:P00488:Q9NQP5	NP_000120.2:XP_006715073.1
Matrisome-associated	ECM Regulators	F13A1	coagulation factor XIII, A1 polypeptide	3531	p.ARG704TRP	Factor xiii\x2c a subunit\x2c deficiency of(ClinVar)	Factor XIII deficiency	C0015530	F13A	3531	A6PVK5:H0Y4W5:H0Y796:P00488:Q9NQP5	NP_000120.2:XP_006715073.1
Matrisome-associated	ECM Regulators	F13A1	coagulation factor XIII, A1 polypeptide	3531	p.ASN61LYS	Factor xiii\x2c a subunit\x2c deficiency of(ClinVar)	Factor XIII deficiency	C0015530	F13A	3531	A6PVK5:H0Y4W5:H0Y796:P00488:Q9NQP5	NP_000120.2:XP_006715073.1
Matrisome-associated	ECM Regulators	F13A1	coagulation factor XIII, A1 polypeptide	3531	p.GLY502ARG	Factor xiii\x2c a subunit\x2c deficiency of(ClinVar)	Factor XIII deficiency	C0015530	F13A	3531	A6PVK5:H0Y4W5:H0Y796:P00488:Q9NQP5	NP_000120.2:XP_006715073.1
Matrisome-associated	ECM Regulators	F13A1	coagulation factor XIII, A1 polypeptide	3531	p.GLY563ARG	Factor xiii\x2c a subunit\x2c deficiency of(ClinVar)	Factor XIII deficiency	C0015530	F13A	3531	A6PVK5:H0Y4W5:H0Y796:P00488:Q9NQP5	NP_000120.2:XP_006715073.1
Matrisome-associated	ECM Regulators	F13A1	coagulation factor XIII, A1 polypeptide	3531	p.MET243THR	Factor xiii\x2c a subunit\x2c deficiency of(ClinVar)	Factor XIII deficiency	C0015530	F13A	3531	A6PVK5:H0Y4W5:H0Y796:P00488:Q9NQP5	NP_000120.2:XP_006715073.1
Matrisome-associated	ECM Regulators	F13A1	coagulation factor XIII, A1 polypeptide	3531	p.TYR284CYS	Factor xiii\x2c a subunit\x2c deficiency of(ClinVar)	Factor XIII deficiency	C0015530	F13A	3531	A6PVK5:H0Y4W5:H0Y796:P00488:Q9NQP5	NP_000120.2:XP_006715073.1
Matrisome-associated	ECM Regulators	F13A1	coagulation factor XIII, A1 polypeptide	3531	p.TYR442TER	Factor xiii\x2c a subunit\x2c deficiency of(ClinVar)	Factor XIII deficiency	C0015530	F13A	3531	A6PVK5:H0Y4W5:H0Y796:P00488:Q9NQP5	NP_000120.2:XP_006715073.1
Matrisome-associated	ECM Regulators	F13A1	coagulation factor XIII, A1 polypeptide	3531	p.VAL317PHE	Factor xiii\x2c a subunit\x2c deficiency of(ClinVar)	Factor XIII deficiency	C0015530	F13A	3531	A6PVK5:H0Y4W5:H0Y796:P00488:Q9NQP5	NP_000120.2:XP_006715073.1
Matrisome-associated	ECM Regulators	F13A1	coagulation factor XIII, A1 polypeptide	3531	p.VAL35LEU	Myocardial infarction\x2c protection against|Venous thrombosis\x2c protection against(ClinVar)	Myocardial infarction, protection against	C3277063	F13A	3531	A6PVK5:H0Y4W5:H0Y796:P00488:Q9NQP5	NP_000120.2:XP_006715073.1
Matrisome-associated	ECM Regulators	F13A1	coagulation factor XIII, A1 polypeptide	3531	p.VAL415PHE	Factor xiii\x2c a subunit\x2c deficiency of(ClinVar)	Factor XIII deficiency	C0015530	F13A	3531	A6PVK5:H0Y4W5:H0Y796:P00488:Q9NQP5	NP_000120.2:XP_006715073.1
Matrisome-associated	ECM Regulators	F13B	coagulation factor XIII, B polypeptide	3534	p.ARG115HIS	Venous thrombosis\x2c susceptibility to(ClinVar)	Venous thrombosis, susceptibility to	C4016042	FXIIIB	3534	P05160	NP_001985.2
Matrisome-associated	ECM Regulators	F13B	coagulation factor XIII, B polypeptide	3534	p.CYS450PHE	Factor xiii\x2c b subunit\x2c deficiency of(ClinVar)	Factor XIII deficiency	C0015530	FXIIIB	3534	P05160	NP_001985.2
Matrisome-associated	ECM Regulators	F2	coagulation factor II (thrombin)	3535	p.ARG314CYS	Hereditary factor II deficiency disease(ClinVar)	Factor II deficiency	C0020640;C3203356	PT	3535	C9JV37:E9PIT3:P00734	NP_000497.1
Matrisome-associated	ECM Regulators	F2	coagulation factor II (thrombin)	3535	p.ARG425CYS	Hereditary factor II deficiency disease(ClinVar)	Factor II deficiency	C0020640;C3203356	PT	3535	C9JV37:E9PIT3:P00734	NP_000497.1
Matrisome-associated	ECM Regulators	F2	coagulation factor II (thrombin)	3535	p.ARG425HIS	Hereditary factor II deficiency disease(ClinVar)	Hereditary factor II deficiency disease	C0272317	PT	3535	C9JV37:E9PIT3:P00734	NP_000497.1
Matrisome-associated	ECM Regulators	F2	coagulation factor II (thrombin)	3535	p.ARG431HIS	DYSPROTHROMBINEMIA PROTHROMBIN HIMI-II(ClinVar)	DYSPROTHROMBINEMIA PROTHROMBIN HIMI-II	C4016343	PT	3535	C9JV37:E9PIT3:P00734	NP_000497.1
Matrisome-associated	ECM Regulators	F2	coagulation factor II (thrombin)	3535	p.ARG461TRP	Hereditary factor II deficiency disease(ClinVar)	Factor II deficiency	C0020640;C3203356	PT	3535	C9JV37:E9PIT3:P00734	NP_000497.1
Matrisome-associated	ECM Regulators	F2	coagulation factor II (thrombin)	3535	p.ASP595GLU	Hereditary factor II deficiency disease(ClinVar)	Hereditary factor II deficiency disease	C0272317	PT	3535	C9JV37:E9PIT3:P00734	NP_000497.1
Matrisome-associated	ECM Regulators	F2	coagulation factor II (thrombin)	3535	p.GLU200LYS	PROTHROMBIN TYPE 3(ClinVar)	Factor II deficiency	C0020640;C3203356	PT	3535	C9JV37:E9PIT3:P00734	NP_000497.1
Matrisome-associated	ECM Regulators	F2	coagulation factor II (thrombin)	3535	p.GLU343LYS	Hereditary factor II deficiency disease(ClinVar)	Hereditary factor II deficiency disease	C0272317	PT	3535	C9JV37:E9PIT3:P00734	NP_000497.1
Matrisome-associated	ECM Regulators	F2	coagulation factor II (thrombin)	3535	p.GLU352LYS	Hereditary factor II deficiency disease(ClinVar)	Hereditary factor II deficiency disease	C0272317	PT	3535	C9JV37:E9PIT3:P00734	NP_000497.1
Matrisome-associated	ECM Regulators	F2	coagulation factor II (thrombin)	3535	p.GLY601VAL	Hereditary factor II deficiency disease(ClinVar)	Factor II deficiency	C0020640;C3203356	PT	3535	C9JV37:E9PIT3:P00734	NP_000497.1
Matrisome-associated	ECM Regulators	F2	coagulation factor II (thrombin)	3535	p.MET380THR	Hereditary factor II deficiency disease(ClinVar)	Factor II deficiency	C0020640;C3203356	PT	3535	C9JV37:E9PIT3:P00734	NP_000497.1
Matrisome-associated	ECM Regulators	F7	coagulation factor VII (serum prothrombin conversion accelerator)	3544	p.ARG413GLN	Myocardial infarction\x2c decreased susceptibility to(ClinVar)	Factor 7 deficiency	C0015503	-	3544	E9PH36:F5H8B0:P08709	NP_000122.1:NP_062562.1
Matrisome-associated	ECM Regulators	F7	coagulation factor VII (serum prothrombin conversion accelerator)	3544	p.GLN188TER	Factor VII deficiency(ClinVar)	Factor VII deficiency	C0015503	-	3544	E9PH36:F5H8B0:P08709	NP_000122.1:NP_062562.1
Matrisome-associated	ECM Regulators	F9	coagulation factor IX	3551	p.ALA279THR	Hereditary factor IX deficiency disease(ClinVar)	Haemophilia B	C0008533	FIX|HEMB|MGC129641|MGC129642|PTC	3551	P00740	NP_000124.1
Matrisome-associated	ECM Regulators	F9	coagulation factor IX	3551	p.ALA337PRO	Hereditary factor IX deficiency disease(ClinVar)	Haemophilia B	C0008533	FIX|HEMB|MGC129641|MGC129642|PTC	3551	P00740	NP_000124.1
Matrisome-associated	ECM Regulators	F9	coagulation factor IX	3551	p.ALA397PRO	Hereditary factor IX deficiency disease(ClinVar)	Haemophilia B	C0008533	FIX|HEMB|MGC129641|MGC129642|PTC	3551	P00740	NP_000124.1
Matrisome-associated	ECM Regulators	F9	coagulation factor IX	3551	p.ARG162TER	Hereditary factor IX deficiency disease(ClinVar)	Haemophilia B	C0008533	FIX|HEMB|MGC129641|MGC129642|PTC	3551	P00740	NP_000124.1
Matrisome-associated	ECM Regulators	F9	coagulation factor IX	3551	p.ARG191CYS	Hereditary factor IX deficiency disease(ClinVar)	Haemophilia B	C0008533	FIX|HEMB|MGC129641|MGC129642|PTC	3551	P00740	NP_000124.1
Matrisome-associated	ECM Regulators	F9	coagulation factor IX	3551	p.ARG191HIS	Hereditary factor IX deficiency disease(ClinVar)	Haemophilia B	C0008533	FIX|HEMB|MGC129641|MGC129642|PTC	3551	P00740	NP_000124.1
Matrisome-associated	ECM Regulators	F9	coagulation factor IX	3551	p.ARG226GLN	HEMOPHILIA B(M)(ClinVar)	Haemophilia B	C0008533	FIX|HEMB|MGC129641|MGC129642|PTC	3551	P00740	NP_000124.1
Matrisome-associated	ECM Regulators	F9	coagulation factor IX	3551	p.ARG226TRP	Hereditary factor IX deficiency disease(ClinVar)	Haemophilia B	C0008533	FIX|HEMB|MGC129641|MGC129642|PTC	3551	P00740	NP_000124.1
Matrisome-associated	ECM Regulators	F9	coagulation factor IX	3551	p.ARG294GLN	Hereditary factor IX deficiency disease(ClinVar)	Haemophilia B	C0008533	FIX|HEMB|MGC129641|MGC129642|PTC	3551	P00740	NP_000124.1
Matrisome-associated	ECM Regulators	F9	coagulation factor IX	3551	p.ARG294TER	Hereditary factor IX deficiency disease(ClinVar)	Haemophilia B	C0008533	FIX|HEMB|MGC129641|MGC129642|PTC	3551	P00740	NP_000124.1
Matrisome-associated	ECM Regulators	F9	coagulation factor IX	3551	p.ARG298TER	Hereditary factor IX deficiency disease(ClinVar)	Haemophilia B	C0008533	FIX|HEMB|MGC129641|MGC129642|PTC	3551	P00740	NP_000124.1
Matrisome-associated	ECM Regulators	F9	coagulation factor IX	3551	p.ARG379GLN	Hereditary factor IX deficiency disease(ClinVar)	Haemophilia B	C0008533	FIX|HEMB|MGC129641|MGC129642|PTC	3551	P00740	NP_000124.1
Matrisome-associated	ECM Regulators	F9	coagulation factor IX	3551	p.ARG379TER	Hereditary factor IX deficiency disease(ClinVar)	Haemophilia B	C0008533	FIX|HEMB|MGC129641|MGC129642|PTC	3551	P00740	NP_000124.1
Matrisome-associated	ECM Regulators	F9	coagulation factor IX	3551	p.ARG384TER	Hereditary factor IX deficiency disease(ClinVar)	Haemophilia B	C0008533	FIX|HEMB|MGC129641|MGC129642|PTC	3551	P00740	NP_000124.1
Matrisome-associated	ECM Regulators	F9	coagulation factor IX	3551	p.ARG75GLN	Hereditary factor IX deficiency disease(ClinVar)	Haemophilia B	C0008533	FIX|HEMB|MGC129641|MGC129642|PTC	3551	P00740	NP_000124.1
Matrisome-associated	ECM Regulators	F9	coagulation factor IX	3551	p.ARG75TER	Hereditary factor IX deficiency disease(ClinVar)	Haemophilia B	C0008533	FIX|HEMB|MGC129641|MGC129642|PTC	3551	P00740	NP_000124.1
Matrisome-associated	ECM Regulators	F9	coagulation factor IX	3551	p.ASN166TYR	Hereditary factor IX deficiency disease(ClinVar)	Haemophilia B	C0008533	FIX|HEMB|MGC129641|MGC129642|PTC	3551	P00740	NP_000124.1
Matrisome-associated	ECM Regulators	F9	coagulation factor IX	3551	p.ASN306SER	Hereditary factor IX deficiency disease(ClinVar)	Haemophilia B	C0008533	FIX|HEMB|MGC129641|MGC129642|PTC	3551	P00740	NP_000124.1
Matrisome-associated	ECM Regulators	F9	coagulation factor IX	3551	p.ASP110ASN	Hereditary factor IX deficiency disease(ClinVar)	Haemophilia B	C0008533	FIX|HEMB|MGC129641|MGC129642|PTC	3551	P00740	NP_000124.1
Matrisome-associated	ECM Regulators	F9	coagulation factor IX	3551	p.ASP110GLY	Hereditary factor IX deficiency disease(ClinVar)	Haemophilia B	C0008533	FIX|HEMB|MGC129641|MGC129642|PTC	3551	P00740	NP_000124.1
Matrisome-associated	ECM Regulators	F9	coagulation factor IX	3551	p.ASP410HIS	Hereditary factor IX deficiency disease(ClinVar)	Haemophilia B	C0008533	FIX|HEMB|MGC129641|MGC129642|PTC	3551	P00740	NP_000124.1
Matrisome-associated	ECM Regulators	F9	coagulation factor IX	3551	p.ASP93GLY	Hereditary factor IX deficiency disease(ClinVar)	Haemophilia B	C0008533	FIX|HEMB|MGC129641|MGC129642|PTC	3551	P00740	NP_000124.1
Matrisome-associated	ECM Regulators	F9	coagulation factor IX	3551	p.CYS252SER	Hereditary factor IX deficiency disease(ClinVar)	Haemophilia B	C0008533	FIX|HEMB|MGC129641|MGC129642|PTC	3551	P00740	NP_000124.1
Matrisome-associated	ECM Regulators	F9	coagulation factor IX	3551	p.CYS268TRP	Hereditary factor IX deficiency disease(ClinVar)	Haemophilia B	C0008533	FIX|HEMB|MGC129641|MGC129642|PTC	3551	P00740	NP_000124.1
Matrisome-associated	ECM Regulators	F9	coagulation factor IX	3551	p.CYS396SER	Hereditary factor IX deficiency disease(ClinVar)	Haemophilia B	C0008533	FIX|HEMB|MGC129641|MGC129642|PTC	3551	P00740	NP_000124.1
Matrisome-associated	ECM Regulators	F9	coagulation factor IX	3551	p.CYS64ARG	Hereditary factor IX deficiency disease(ClinVar)	Haemophilia B	C0008533	FIX|HEMB|MGC129641|MGC129642|PTC	3551	P00740	NP_000124.1
Matrisome-associated	ECM Regulators	F9	coagulation factor IX	3551	p.GLN219TER	Hereditary factor IX deficiency disease(ClinVar)	Haemophilia B	C0008533	FIX|HEMB|MGC129641|MGC129642|PTC	3551	P00740	NP_000124.1
Matrisome-associated	ECM Regulators	F9	coagulation factor IX	3551	p.GLN237LEU	Hereditary factor IX deficiency disease(ClinVar)	Hereditary factor IX deficiency disease	C0008533	FIX|HEMB|MGC129641|MGC129642|PTC	3551	P00740	NP_000124.1
Matrisome-associated	ECM Regulators	F9	coagulation factor IX	3551	p.GLN237TER	Hereditary factor IX deficiency disease(ClinVar)	Haemophilia B	C0008533	FIX|HEMB|MGC129641|MGC129642|PTC	3551	P00740	NP_000124.1
Matrisome-associated	ECM Regulators	F9	coagulation factor IX	3551	p.GLN57TER	Hereditary factor IX deficiency disease(ClinVar)	Haemophilia B	C0008533	FIX|HEMB|MGC129641|MGC129642|PTC	3551	P00740	NP_000124.1
Matrisome-associated	ECM Regulators	F9	coagulation factor IX	3551	p.GLN96PRO	Hereditary factor IX deficiency disease(ClinVar)	Haemophilia B	C0008533	FIX|HEMB|MGC129641|MGC129642|PTC	3551	P00740	NP_000124.1
Matrisome-associated	ECM Regulators	F9	coagulation factor IX	3551	p.GLU291VAL	Hereditary factor IX deficiency disease(ClinVar)	Haemophilia B	C0008533	FIX|HEMB|MGC129641|MGC129642|PTC	3551	P00740	NP_000124.1
Matrisome-associated	ECM Regulators	F9	coagulation factor IX	3551	p.GLU73LYS	Hereditary factor IX deficiency disease(ClinVar)	Haemophilia B	C0008533	FIX|HEMB|MGC129641|MGC129642|PTC	3551	P00740	NP_000124.1
Matrisome-associated	ECM Regulators	F9	coagulation factor IX	3551	p.GLU73VAL	Hereditary factor IX deficiency disease(ClinVar)	Haemophilia B	C0008533	FIX|HEMB|MGC129641|MGC129642|PTC	3551	P00740	NP_000124.1
Matrisome-associated	ECM Regulators	F9	coagulation factor IX	3551	p.GLU79ASP	Hereditary factor IX deficiency disease(ClinVar)	Haemophilia B	C0008533	FIX|HEMB|MGC129641|MGC129642|PTC	3551	P00740	NP_000124.1
Matrisome-associated	ECM Regulators	F9	coagulation factor IX	3551	p.GLY106SER	Hereditary factor IX deficiency disease(ClinVar)	Haemophilia B	C0008533	FIX|HEMB|MGC129641|MGC129642|PTC	3551	P00740	NP_000124.1
Matrisome-associated	ECM Regulators	F9	coagulation factor IX	3551	p.GLY160ALA	Hereditary factor IX deficiency disease(ClinVar)	Haemophilia B	C0008533	FIX|HEMB|MGC129641|MGC129642|PTC	3551	P00740	NP_000124.1
Matrisome-associated	ECM Regulators	F9	coagulation factor IX	3551	p.GLY355VAL	Hereditary factor IX deficiency disease(ClinVar)	Haemophilia B	C0008533	FIX|HEMB|MGC129641|MGC129642|PTC	3551	P00740	NP_000124.1
Matrisome-associated	ECM Regulators	F9	coagulation factor IX	3551	p.GLY357ARG	Hereditary factor IX deficiency disease(ClinVar)	Haemophilia B	C0008533	FIX|HEMB|MGC129641|MGC129642|PTC	3551	P00740	NP_000124.1
Matrisome-associated	ECM Regulators	F9	coagulation factor IX	3551	p.GLY357GLU	Hereditary factor IX deficiency disease(ClinVar)	Haemophilia B	C0008533	FIX|HEMB|MGC129641|MGC129642|PTC	3551	P00740	NP_000124.1
Matrisome-associated	ECM Regulators	F9	coagulation factor IX	3551	p.GLY409VAL	Hereditary factor IX deficiency disease(ClinVar)	Haemophilia B	C0008533	FIX|HEMB|MGC129641|MGC129642|PTC	3551	P00740	NP_000124.1
Matrisome-associated	ECM Regulators	F9	coagulation factor IX	3551	p.GLY442ARG	Hereditary factor IX deficiency disease(ClinVar)	Haemophilia B	C0008533	FIX|HEMB|MGC129641|MGC129642|PTC	3551	P00740	NP_000124.1
Matrisome-associated	ECM Regulators	F9	coagulation factor IX	3551	p.ILE390THR	Hereditary factor IX deficiency disease(ClinVar)	Haemophilia B	C0008533	FIX|HEMB|MGC129641|MGC129642|PTC	3551	P00740	NP_000124.1
Matrisome-associated	ECM Regulators	F9	coagulation factor IX	3551	p.ILE443THR	Hereditary factor IX deficiency disease(ClinVar)	Haemophilia B	C0008533	FIX|HEMB|MGC129641|MGC129642|PTC	3551	P00740	NP_000124.1
Matrisome-associated	ECM Regulators	F9	coagulation factor IX	3551	p.LYS457TER	Hereditary factor IX deficiency disease(ClinVar)	Haemophilia B	C0008533	FIX|HEMB|MGC129641|MGC129642|PTC	3551	P00740	NP_000124.1
Matrisome-associated	ECM Regulators	F9	coagulation factor IX	3551	p.MET394VAL	Hereditary factor IX deficiency disease(ClinVar)	Haemophilia B	C0008533	FIX|HEMB|MGC129641|MGC129642|PTC	3551	P00740	NP_000124.1
Matrisome-associated	ECM Regulators	F9	coagulation factor IX	3551	p.PRO101ALA	Hereditary factor IX deficiency disease(ClinVar)	Haemophilia B	C0008533	FIX|HEMB|MGC129641|MGC129642|PTC	3551	P00740	NP_000124.1
Matrisome-associated	ECM Regulators	F9	coagulation factor IX	3551	p.PRO333LEU	Hereditary factor IX deficiency disease(ClinVar)	Haemophilia B	C0008533	FIX|HEMB|MGC129641|MGC129642|PTC	3551	P00740	NP_000124.1
Matrisome-associated	ECM Regulators	F9	coagulation factor IX	3551	p.PRO414THR	Hereditary factor IX deficiency disease(ClinVar)	Haemophilia B	C0008533	FIX|HEMB|MGC129641|MGC129642|PTC	3551	P00740	NP_000124.1
Matrisome-associated	ECM Regulators	F9	coagulation factor IX	3551	p.SER406LEU	Hereditary factor IX deficiency disease(ClinVar)	Haemophilia B	C0008533	FIX|HEMB|MGC129641|MGC129642|PTC	3551	P00740	NP_000124.1
Matrisome-associated	ECM Regulators	F9	coagulation factor IX	3551	p.SER411GLY	Hereditary factor IX deficiency disease(ClinVar)	Haemophilia B	C0008533	FIX|HEMB|MGC129641|MGC129642|PTC	3551	P00740	NP_000124.1
Matrisome-associated	ECM Regulators	F9	coagulation factor IX	3551	p.SER411ILE	Hereditary factor IX deficiency disease(ClinVar)	Haemophilia B	C0008533	FIX|HEMB|MGC129641|MGC129642|PTC	3551	P00740	NP_000124.1
Matrisome-associated	ECM Regulators	F9	coagulation factor IX	3551	p.THR194ALA	Deep venous thrombosis\x2c protection against(ClinVar)	Deep venous thrombosis, protection against	C3275410	FIX|HEMB|MGC129641|MGC129642|PTC	3551	P00740	NP_000124.1
Matrisome-associated	ECM Regulators	F9	coagulation factor IX	3551	p.THR342MET	Hereditary factor IX deficiency disease(ClinVar)	Haemophilia B	C0008533	FIX|HEMB|MGC129641|MGC129642|PTC	3551	P00740	NP_000124.1
Matrisome-associated	ECM Regulators	F9	coagulation factor IX	3551	p.TRP453ARG	Hereditary factor IX deficiency disease(ClinVar)	Haemophilia B	C0008533	FIX|HEMB|MGC129641|MGC129642|PTC	3551	P00740	NP_000124.1
Matrisome-associated	ECM Regulators	F9	coagulation factor IX	3551	p.VAL227PHE	Hereditary factor IX deficiency disease(ClinVar)	Haemophilia B	C0008533	FIX|HEMB|MGC129641|MGC129642|PTC	3551	P00740	NP_000124.1
Matrisome-associated	ECM Regulators	F9	coagulation factor IX	3551	p.VAL353ALA	Hereditary factor IX deficiency disease(ClinVar)	Haemophilia B	C0008533	FIX|HEMB|MGC129641|MGC129642|PTC	3551	P00740	NP_000124.1
Matrisome-associated	ECM Regulators	F9	coagulation factor IX	3551	p.VAL374PHE	Hereditary factor IX deficiency disease(ClinVar)	Haemophilia B	C0008533	FIX|HEMB|MGC129641|MGC129642|PTC	3551	P00740	NP_000124.1
Matrisome-associated	ECM Regulators	F9	coagulation factor IX	3551	p.VAL419GLU	Hereditary factor IX deficiency disease(ClinVar)	Haemophilia B	C0008533	FIX|HEMB|MGC129641|MGC129642|PTC	3551	P00740	NP_000124.1
Matrisome-associated	ECM Regulators	FAM20C	family with sequence similarity 20, member C	22140	p.GLY365ARG	Raine syndrome(ClinVar)	RAINE SYNDROME	C1850106	"dentin matrix protein 4", DKFZp547D065, DMP4, IMAGE:4942737	22140	Q8IXL6	NP_064608.2:XP_005249871.1
Matrisome-associated	ECM Regulators	HABP2	hyaluronan binding protein 2	4798	p.GLY534GLU	Factor VII Marburg I Variant Thrombophilia|Carotid stenosis\x2c susceptibility to|Venous thromboembolism\x2c susceptibility to(ClinVar)	Carotid stenosis	C0007282	FSAP|HABP|HGFAL|PHBP	4798	B7Z8Q5:F5H475:Q14520	NP_001171131.1:NP_004123.1
Matrisome-associated	ECM Regulators	HPSE2	heparanase 2	18374	p.ARG153TER	Ochoa syndrome(ClinVar)	Ochoa syndrome	C0403555	FLJ11684|FLJ44022|HPA2|HPR2|MGC133234	18374	Q8WWQ2	NP_001159716.1:NP_001159717.1:NP_001159718.1:NP_068600.4
Matrisome-associated	ECM Regulators	HPSE2	heparanase 2	18374	p.ARG472TER	Ochoa syndrome(ClinVar)	Ochoa syndrome	C0403555	FLJ11684|FLJ44022|HPA2|HPR2|MGC133234	18374	Q8WWQ2	NP_001159716.1:NP_001159717.1:NP_001159718.1:NP_068600.4
Matrisome-associated	ECM Regulators	HPSE2	heparanase 2	18374	p.ARG506TER	Ochoa syndrome(ClinVar)	Ochoa syndrome	C0403555	FLJ11684|FLJ44022|HPA2|HPR2|MGC133234	18374	Q8WWQ2	NP_001159716.1:NP_001159717.1:NP_001159718.1:NP_068600.4
Matrisome-associated	ECM Regulators	HRG	histidine-rich glycoprotein	5181	p.GLY103GLU	Thrombophilia\x2c histidine-rich glycoprotein-related(ClinVar)	THPH11	C2751090;C2981723	DKFZp779H1622|HPRG|HRGP	5181	P04196	NP_000403.1
Matrisome-associated	ECM Regulators	HTRA1	HtrA serine peptidase 1	9476	p.ARG302TER	Cerebral autosomal recessive arteriopathy with subcortical infarcts and leukoencephalopathy(ClinVar)	AND LEUKOENCEPHALOPATHY	C0270612	ARMD7|HtrA|L56|ORF480|PRSS11	9476	H0Y7G9:Q92743	NP_002766.1
Matrisome-associated	ECM Regulators	HTRA1	HtrA serine peptidase 1	9476	p.ARG370TER	Cerebral autosomal recessive arteriopathy with subcortical infarcts and leukoencephalopathy(ClinVar)	AND LEUKOENCEPHALOPATHY	C0270612	ARMD7|HtrA|L56|ORF480|PRSS11	9476	H0Y7G9:Q92743	NP_002766.1
Matrisome-associated	ECM Regulators	HYAL1	hyaluronoglucosaminidase 1	5320	p.GLU268LYS	Deficiency of hyaluronoglucosaminidase(ClinVar)	Deficiency of hyaluronoglucosaminidase	C1291490	HYAL-1|LUCA1|MGC45987|NAT6	5320	C9JB49:C9JRK1:Q12794	NP_149349.2:NP_695013.1:NP_695014.1:NP_695015.1:NP_695017.1
Matrisome-associated	ECM Regulators	KNG1	kininogen 1	6383	p.ARG196TER	Kininogen deficiency\x2c total(ClinVar)	Kininogen deficiency	C0272340	BDK|KNG	6383	P01042	NP_000884.1:NP_001095886.1:NP_001159923.1
Matrisome-associated	ECM Regulators	LEPRE1	leucine proline-enriched proteoglycan (leprecan) 1	19316	p.ARG368TER	Osteogenesis imperfecta type 8(ClinVar)	Osteogenesis imperfecta type VIII	C1970458	GROS1|MGC117314|OI8|P3H1	19316	E2QRI1:H7C0D1:H7C2W6:Q32P28	NP_001139761.1:NP_001230175.1:NP_071751.3
Matrisome-associated	ECM Regulators	LEPRE1	leucine proline-enriched proteoglycan (leprecan) 1	19316	p.TYR552TER	Osteogenesis imperfecta type 8(ClinVar)	Osteogenesis imperfecta type VIII	C1970458	GROS1|MGC117314|OI8|P3H1	19316	E2QRI1:H7C0D1:H7C2W6:Q32P28	NP_001139761.1:NP_001230175.1:NP_071751.3
Matrisome-associated	ECM Regulators	LOXL1	lysyl oxidase-like 1	6665	p.ARG141LEU	Exfoliation syndrome\x2c susceptibility to(ClinVar)	Exfoliation syndrome, susceptibility to	C4016255	LOL|LOXL	6665	H3BUV8:Q08397	NP_005567.2
Matrisome-associated	ECM Regulators	LOXL1	lysyl oxidase-like 1	6665	p.GLY153ASP	Exfoliation syndrome\x2c susceptibility to(ClinVar)	Exfoliation syndrome, susceptibility to	C4016255	LOL|LOXL	6665	H3BUV8:Q08397	NP_005567.2
Matrisome-associated	ECM Regulators	LPA	lipoprotein, Lp(a)	6667	p.ARG37TER	LIPOPROTEIN(a) DEFICIENCY\x2c CONGENITAL(ClinVar)	LIPOPROTEIN(a) DEFICIENCY, CONGENITAL	C1835362	AK38|APOA|LP	6667	P08519	NP_005568.2
Matrisome-associated	ECM Regulators	MASP2	mannan-binding lectin serine peptidase 2	6902	p.ASP120GLY	Masp2 deficiency(ClinVar)	Masp2 deficiency	C3151085	MAP19|MASP-2|MASP1P1|sMAP	6902	O00187	NP_006601.2:NP_631947.1
Matrisome-associated	ECM Regulators	MMP13	matrix metallopeptidase 13 (collagenase 3)	7159	p.HIS232ASN	Metaphyseal anadysplasia 1\x2c autosomal recessive(ClinVar)	Metaphyseal anadysplasia	C0432226	CLG3|MANDP1	7159	G5E971:P45452	NP_002418.1
Matrisome-associated	ECM Regulators	MMP13	matrix metallopeptidase 13 (collagenase 3)	7159	p.MET91THR	Metaphyseal anadysplasia 1\x2c autosomal dominant(ClinVar)	Metaphyseal anadysplasia	C0432226	CLG3|MANDP1	7159	G5E971:P45452	NP_002418.1
Matrisome-associated	ECM Regulators	MMP13	matrix metallopeptidase 13 (collagenase 3)	7159	p.PHE74SER	Metaphyseal anadysplasia 1\x2c autosomal dominant(ClinVar)	Metaphyseal anadysplasia	C0432226	CLG3|MANDP1	7159	G5E971:P45452	NP_002418.1
Matrisome-associated	ECM Regulators	MMP13	matrix metallopeptidase 13 (collagenase 3)	7159	p.PHE75SER	Spondyloepimetaphyseal dysplasia\x2c missouri type(ClinVar)	Spondyloepimetaphyseal dysplasia, missouri type	C1865832	CLG3|MANDP1	7159	G5E971:P45452	NP_002418.1
Matrisome-associated	ECM Regulators	MMP2	matrix metallopeptidase 2 (gelatinase A, 72kDa gelatinase, 72kDa type IV collagenase)	7166	p.ARG101HIS	Torg Winchester syndrome(ClinVar)	Torg Winchester syndrome	C1850155	CLG4|CLG4A|MMP-II|MONA|TBE-1	7166	H3BR66:H3BS34:H3BV48:J3KRB7:P08253	NP_001121363.1:NP_004521.1
Matrisome-associated	ECM Regulators	MMP2	matrix metallopeptidase 2 (gelatinase A, 72kDa gelatinase, 72kDa type IV collagenase)	7166	p.GLU404LYS	Torg Winchester syndrome(ClinVar)	Torg Winchester syndrome	C1850155	CLG4|CLG4A|MMP-II|MONA|TBE-1	7166	H3BR66:H3BS34:H3BV48:J3KRB7:P08253	NP_001121363.1:NP_004521.1
Matrisome-associated	ECM Regulators	MMP2	matrix metallopeptidase 2 (gelatinase A, 72kDa gelatinase, 72kDa type IV collagenase)	7166	p.TYR244TER	Torg Winchester syndrome(ClinVar)	Torg Winchester syndrome	C1850155	CLG4|CLG4A|MMP-II|MONA|TBE-1	7166	H3BR66:H3BS34:H3BV48:J3KRB7:P08253	NP_001121363.1:NP_004521.1
Matrisome-associated	ECM Regulators	MMP9	matrix metallopeptidase 9 (gelatinase B, 92kDa gelatinase, 92kDa type IV collagenase)	7176	p.MET1LYS	Metaphyseal anadysplasia 2\x2c autosomal recessive(ClinVar)	Metaphyseal anadysplasia	C0432226	CLG4B|GELB|MANDP2|MMP-9	7176	P14780	NP_004985.2
Matrisome-associated	ECM Regulators	PLG	plasminogen	9071	p.ALA620THR	Dysplasminogenemia(ClinVar)	Dysplasminogenemia	C1968804	DKFZp779M0222	9071	A6PVI2:P00747:Q5TEH5	NP_000292.1:NP_001161810.1
Matrisome-associated	ECM Regulators	PLG	plasminogen	9071	p.ARG235HIS	PLASMINOGEN DEFICIENCY\x2c TYPE I(ClinVar)	Plasminogen deficiency	C0398621	DKFZp779M0222	9071	A6PVI2:P00747:Q5TEH5	NP_000292.1:NP_001161810.1
Matrisome-associated	ECM Regulators	PLG	plasminogen	9071	p.GLU479TER	PLASMINOGEN DEFICIENCY\x2c TYPE I(ClinVar)	Plasminogen deficiency	C0398621	DKFZp779M0222	9071	A6PVI2:P00747:Q5TEH5	NP_000292.1:NP_001161810.1
Matrisome-associated	ECM Regulators	PLG	plasminogen	9071	p.GLY751ARG	Dysplasminogenemia(ClinVar)	Dysplasminogenemia	C1968804	DKFZp779M0222	9071	A6PVI2:P00747:Q5TEH5	NP_000292.1:NP_001161810.1
Matrisome-associated	ECM Regulators	PLG	plasminogen	9071	p.LYS38GLU	PLASMINOGEN DEFICIENCY\x2c TYPE I(ClinVar)	Plasminogen deficiency	C0398621	DKFZp779M0222	9071	A6PVI2:P00747:Q5TEH5	NP_000292.1:NP_001161810.1
Matrisome-associated	ECM Regulators	PLG	plasminogen	9071	p.SER591PRO	Dysplasminogenemia(ClinVar)	Dysplasminogenemia	C1968804	DKFZp779M0222	9071	A6PVI2:P00747:Q5TEH5	NP_000292.1:NP_001161810.1
Matrisome-associated	ECM Regulators	PLG	plasminogen	9071	p.TRP616TER	PLASMINOGEN DEFICIENCY\x2c TYPE I(ClinVar)	Plasminogen deficiency	C0398621	DKFZp779M0222	9071	A6PVI2:P00747:Q5TEH5	NP_000292.1:NP_001161810.1
Matrisome-associated	ECM Regulators	PLG	plasminogen	9071	p.VAL374PHE	Dysplasminogenemia(ClinVar)	Dysplasminogenemia	C1968804	DKFZp779M0222	9071	A6PVI2:P00747:Q5TEH5	NP_000292.1:NP_001161810.1
Matrisome-associated	ECM Regulators	PLOD1	procollagen-lysine 1, 2-oxoglutarate 5-dioxygenase 1	9081	p.ARG670TER	Ehlers-Danlos syndrome\x2c hydroxylysine-deficient(ClinVar)	Ehlers-Danlos syndrome, hydroxylysine-deficient	C0268342	FLJ42041|LH|LH1|LLH|PLOD	9081	B4DR87:Q02809:Q5JXB7:Q5JXB8:Q5JXB9	NP_000293.2
Matrisome-associated	ECM Regulators	PLOD1	procollagen-lysine 1, 2-oxoglutarate 5-dioxygenase 1	9081	p.GLY678ARG	Ehlers-Danlos syndrome\x2c hydroxylysine-deficient(ClinVar)	EDS6	C0268342	FLJ42041|LH|LH1|LLH|PLOD	9081	B4DR87:Q02809:Q5JXB7:Q5JXB8:Q5JXB9	NP_000293.2
Matrisome-associated	ECM Regulators	PLOD1	procollagen-lysine 1, 2-oxoglutarate 5-dioxygenase 1	9081	p.TRP612CYS	Ehlers-Danlos syndrome\x2c hydroxylysine-deficient(ClinVar)	EDS6	C0268342	FLJ42041|LH|LH1|LLH|PLOD	9081	B4DR87:Q02809:Q5JXB7:Q5JXB8:Q5JXB9	NP_000293.2
Matrisome-associated	ECM Regulators	PLOD1	procollagen-lysine 1, 2-oxoglutarate 5-dioxygenase 1	9081	p.TYR511TER	Ehlers-Danlos syndrome\x2c hydroxylysine-deficient(ClinVar)	Ehlers-Danlos syndrome, hydroxylysine-deficient	C0268342	FLJ42041|LH|LH1|LLH|PLOD	9081	B4DR87:Q02809:Q5JXB7:Q5JXB8:Q5JXB9	NP_000293.2
Matrisome-associated	ECM Regulators	PLOD2	procollagen-lysine, 2-oxoglutarate 5-dioxygenase 2	9082	p.ARG619HIS	Bruck syndrome 2(ClinVar)	Bruck syndrome	C0432253	LH2|TLH	9082	B3KWS3:C9JXZ0:E7ETU9:F8WEW3:O00469	NP_000926.2:NP_891988.1
Matrisome-associated	ECM Regulators	PLOD2	procollagen-lysine, 2-oxoglutarate 5-dioxygenase 2	9082	p.GLY622VAL	Bruck syndrome 2(ClinVar)	Bruck syndrome	C0432253	LH2|TLH	9082	B3KWS3:C9JXZ0:E7ETU9:F8WEW3:O00469	NP_000926.2:NP_891988.1
Matrisome-associated	ECM Regulators	PLOD2	procollagen-lysine, 2-oxoglutarate 5-dioxygenase 2	9082	p.THR629ILE	Bruck syndrome 2(ClinVar)	Bruck syndrome	C0432253	LH2|TLH	9082	B3KWS3:C9JXZ0:E7ETU9:F8WEW3:O00469	NP_000926.2:NP_891988.1
Matrisome-associated	ECM Regulators	PLOD3	procollagen-lysine, 2-oxoglutarate 5-dioxygenase 3	9083	p.ASN223SER	Bone fragility with contractures\x2c arterial rupture\x2c and deafness(ClinVar)	Bone fragility with contractures, arterial rupture, and deafness	C2676285	LH3	9083	C9JIX5:C9JU11:H7C0B8:H7C2A8:H7C2S8:H7C2V1:O60568	NP_001075.1
Matrisome-associated	ECM Regulators	PRSS1	protease, serine, 1 (trypsin 1)	9475	p.ARG122CYS	Hereditary pancreatitis(ClinVar)	Hereditary pancreatitis	C0238339	TRP1|TRY1|TRY4|TRYP1	9475	E7EQ64:H0Y8D1:P07477	NP_002760.1
Matrisome-associated	ECM Regulators	PRSS1	protease, serine, 1 (trypsin 1)	9475	p.ARG122HIS	Hereditary pancreatitis(ClinVar)	Hereditary pancreatitis	C0238339	TRP1|TRY1|TRY4|TRYP1	9475	E7EQ64:H0Y8D1:P07477	NP_002760.1
Matrisome-associated	ECM Regulators	PRSS1	protease, serine, 1 (trypsin 1)	9475	p.ASN29ILE	Hereditary pancreatitis(ClinVar)	Hereditary pancreatitis	C0238339	TRP1|TRY1|TRY4|TRYP1	9475	E7EQ64:H0Y8D1:P07477	NP_002760.1
Matrisome-associated	ECM Regulators	PRSS1	protease, serine, 1 (trypsin 1)	9475	p.ASN54SER	Hereditary pancreatitis(ClinVar)	Hereditary pancreatitis	C0238339	TRP1|TRY1|TRY4|TRYP1	9475	E7EQ64:H0Y8D1:P07477	NP_002760.1
Matrisome-associated	ECM Regulators	PRSS1	protease, serine, 1 (trypsin 1)	9475	p.GLU79LYS	Hereditary pancreatitis(ClinVar)	Hereditary pancreatitis	C0238339	TRP1|TRY1|TRY4|TRYP1	9475	E7EQ64:H0Y8D1:P07477	NP_002760.1
Matrisome-associated	ECM Regulators	PRSS1	protease, serine, 1 (trypsin 1)	9475	p.LYS23ARG	Hereditary pancreatitis(ClinVar)	Hereditary pancreatitis	C0238339	TRP1|TRY1|TRY4|TRYP1	9475	E7EQ64:H0Y8D1:P07477	NP_002760.1
Matrisome-associated	ECM Regulators	PRSS1	protease, serine, 1 (trypsin 1)	9475	p.PRO133ARG	Hereditary pancreatitis(ClinVar)	Hereditary pancreatitis	C0238339	TRP1|TRY1|TRY4|TRYP1	9475	E7EQ64:H0Y8D1:P07477	NP_002760.1
Matrisome-associated	ECM Regulators	PRSS1	protease, serine, 1 (trypsin 1)	9475	p.THR130ILE	Hereditary pancreatitis(ClinVar)	Hereditary pancreatitis	C0238339	TRP1|TRY1|TRY4|TRYP1	9475	E7EQ64:H0Y8D1:P07477	NP_002760.1
Matrisome-associated	ECM Regulators	SERPINA1	serpin peptidase inhibitor, clade A (alpha-1 antiproteinase, antitrypsin), member 1	8941	p.ALA360THR	PI W(BETHESDA)(ClinVar)	Antitrypsin alpha 1 deficiency	C0221757;C3501835	A1A|A1AT|AAT|MGC23330|MGC9222|PI|PI1|PRO2275	8941	G3V2B9:G3V387:G3V4I7:G3V544:G3V5R8:P01009	NP_000286.3:NP_001002235.1:NP_001002236.1:NP_001121172.1:NP_001121173.1:NP_001121174.1:NP_001121175.1:NP_001121176.1:NP_001121177.1:NP_001121178.1:NP_001121179.1
Matrisome-associated	ECM Regulators	SERPINA1	serpin peptidase inhibitor, clade A (alpha-1 antiproteinase, antitrypsin), member 1	8941	p.ARG125HIS	PI M2(ClinVar)	PI M2	C4015798	A1A|A1AT|AAT|MGC23330|MGC9222|PI|PI1|PRO2275	8941	G3V2B9:G3V387:G3V4I7:G3V544:G3V5R8:P01009	NP_000286.3:NP_001002235.1:NP_001002236.1:NP_001121172.1:NP_001121173.1:NP_001121174.1:NP_001121175.1:NP_001121176.1:NP_001121177.1:NP_001121178.1:NP_001121179.1
Matrisome-associated	ECM Regulators	SERPINA1	serpin peptidase inhibitor, clade A (alpha-1 antiproteinase, antitrypsin), member 1	8941	p.ARG247CYS	PI F(ClinVar)	Antitrypsin alpha 1 deficiency	C0221757;C3501835	A1A|A1AT|AAT|MGC23330|MGC9222|PI|PI1|PRO2275	8941	G3V2B9:G3V387:G3V4I7:G3V544:G3V5R8:P01009	NP_000286.3:NP_001002235.1:NP_001002236.1:NP_001121172.1:NP_001121173.1:NP_001121174.1:NP_001121175.1:NP_001121176.1:NP_001121177.1:NP_001121178.1:NP_001121179.1
Matrisome-associated	ECM Regulators	SERPINA1	serpin peptidase inhibitor, clade A (alpha-1 antiproteinase, antitrypsin), member 1	8941	p.ARG63CYS	PI I(ClinVar)	Antitrypsin alpha 1 deficiency	C0221757;C3501835	A1A|A1AT|AAT|MGC23330|MGC9222|PI|PI1|PRO2275	8941	G3V2B9:G3V387:G3V4I7:G3V544:G3V5R8:P01009	NP_000286.3:NP_001002235.1:NP_001002236.1:NP_001121172.1:NP_001121173.1:NP_001121174.1:NP_001121175.1:NP_001121176.1:NP_001121177.1:NP_001121178.1:NP_001121179.1
Matrisome-associated	ECM Regulators	SERPINA1	serpin peptidase inhibitor, clade A (alpha-1 antiproteinase, antitrypsin), member 1	8941	p.ASP26ALA	PI V(MUNICH)(ClinVar)	PI V(MUNICH)	C4015820	A1A|A1AT|AAT|MGC23330|MGC9222|PI|PI1|PRO2275	8941	G3V2B9:G3V387:G3V4I7:G3V544:G3V5R8:P01009	NP_000286.3:NP_001002235.1:NP_001002236.1:NP_001121172.1:NP_001121173.1:NP_001121174.1:NP_001121175.1:NP_001121176.1:NP_001121177.1:NP_001121178.1:NP_001121179.1
Matrisome-associated	ECM Regulators	SERPINA1	serpin peptidase inhibitor, clade A (alpha-1 antiproteinase, antitrypsin), member 1	8941	p.ASP280VAL	PI P(LOWELL)|PI NULL(CARDIFF)|PI Q0(CARDIFF)(ClinVar)	Antitrypsin alpha 1 deficiency	C0221757;C3501835	A1A|A1AT|AAT|MGC23330|MGC9222|PI|PI1|PRO2275	8941	G3V2B9:G3V387:G3V4I7:G3V544:G3V5R8:P01009	NP_000286.3:NP_001002235.1:NP_001002236.1:NP_001121172.1:NP_001121173.1:NP_001121174.1:NP_001121175.1:NP_001121176.1:NP_001121177.1:NP_001121178.1:NP_001121179.1
Matrisome-associated	ECM Regulators	SERPINA1	serpin peptidase inhibitor, clade A (alpha-1 antiproteinase, antitrypsin), member 1	8941	p.GLU228LYS	PI X(ClinVar)	Antitrypsin alpha 1 deficiency	C0221757;C3501835	A1A|A1AT|AAT|MGC23330|MGC9222|PI|PI1|PRO2275	8941	G3V2B9:G3V387:G3V4I7:G3V544:G3V5R8:P01009	NP_000286.3:NP_001002235.1:NP_001002236.1:NP_001121172.1:NP_001121173.1:NP_001121174.1:NP_001121175.1:NP_001121176.1:NP_001121177.1:NP_001121178.1:NP_001121179.1
Matrisome-associated	ECM Regulators	SERPINA1	serpin peptidase inhibitor, clade A (alpha-1 antiproteinase, antitrypsin), member 1	8941	p.GLU288VAL	PI S(ClinVar)	Antitrypsin alpha 1 deficiency	C0221757;C3501835	A1A|A1AT|AAT|MGC23330|MGC9222|PI|PI1|PRO2275	8941	G3V2B9:G3V387:G3V4I7:G3V544:G3V5R8:P01009	NP_000286.3:NP_001002235.1:NP_001002236.1:NP_001121172.1:NP_001121173.1:NP_001121174.1:NP_001121175.1:NP_001121176.1:NP_001121177.1:NP_001121178.1:NP_001121179.1
Matrisome-associated	ECM Regulators	SERPINA1	serpin peptidase inhibitor, clade A (alpha-1 antiproteinase, antitrypsin), member 1	8941	p.GLU366LYS	PI Z(ClinVar)	Antitrypsin alpha 1 deficiency	C0221757;C3501835	A1A|A1AT|AAT|MGC23330|MGC9222|PI|PI1|PRO2275	8941	G3V2B9:G3V387:G3V4I7:G3V544:G3V5R8:P01009	NP_000286.3:NP_001002235.1:NP_001002236.1:NP_001121172.1:NP_001121173.1:NP_001121174.1:NP_001121175.1:NP_001121176.1:NP_001121177.1:NP_001121178.1:NP_001121179.1
Matrisome-associated	ECM Regulators	SERPINA1	serpin peptidase inhibitor, clade A (alpha-1 antiproteinase, antitrypsin), member 1	8941	p.GLU387LYS	PI CHRISTCHURCH(ClinVar)	PI CHRISTCHURCH	C4015804	A1A|A1AT|AAT|MGC23330|MGC9222|PI|PI1|PRO2275	8941	G3V2B9:G3V387:G3V4I7:G3V544:G3V5R8:P01009	NP_000286.3:NP_001002235.1:NP_001002236.1:NP_001121172.1:NP_001121173.1:NP_001121174.1:NP_001121175.1:NP_001121176.1:NP_001121177.1:NP_001121178.1:NP_001121179.1
Matrisome-associated	ECM Regulators	SERPINA1	serpin peptidase inhibitor, clade A (alpha-1 antiproteinase, antitrypsin), member 1	8941	p.GLU400ASP	PI M3(ClinVar)	PI M3	C4015799	A1A|A1AT|AAT|MGC23330|MGC9222|PI|PI1|PRO2275	8941	G3V2B9:G3V387:G3V4I7:G3V544:G3V5R8:P01009	NP_000286.3:NP_001002235.1:NP_001002236.1:NP_001121172.1:NP_001121173.1:NP_001121174.1:NP_001121175.1:NP_001121176.1:NP_001121177.1:NP_001121178.1:NP_001121179.1
Matrisome-associated	ECM Regulators	SERPINA1	serpin peptidase inhibitor, clade A (alpha-1 antiproteinase, antitrypsin), member 1	8941	p.GLY139SER	PI NULL(DEVON)|PI Q0(DEVON)|PI NULL(NEWPORT)|PI Q0(NEWPORT)(ClinVar)	Antitrypsin alpha 1 deficiency	C0221757;C3501835	A1A|A1AT|AAT|MGC23330|MGC9222|PI|PI1|PRO2275	8941	G3V2B9:G3V387:G3V4I7:G3V544:G3V5R8:P01009	NP_000286.3:NP_001002235.1:NP_001002236.1:NP_001121172.1:NP_001121173.1:NP_001121174.1:NP_001121175.1:NP_001121176.1:NP_001121177.1:NP_001121178.1:NP_001121179.1
Matrisome-associated	ECM Regulators	SERPINA1	serpin peptidase inhibitor, clade A (alpha-1 antiproteinase, antitrypsin), member 1	8941	p.GLY91GLU	PI M(MINERAL SPRINGS)(ClinVar)	Antitrypsin alpha 1 deficiency	C0221757;C3501835	A1A|A1AT|AAT|MGC23330|MGC9222|PI|PI1|PRO2275	8941	G3V2B9:G3V387:G3V4I7:G3V544:G3V5R8:P01009	NP_000286.3:NP_001002235.1:NP_001002236.1:NP_001121172.1:NP_001121173.1:NP_001121174.1:NP_001121175.1:NP_001121176.1:NP_001121177.1:NP_001121178.1:NP_001121179.1
Matrisome-associated	ECM Regulators	SERPINA1	serpin peptidase inhibitor, clade A (alpha-1 antiproteinase, antitrypsin), member 1	8941	p.ILE116ASN	PI NULL(LUDWIGSHAFEN)|PI Q0(LUDWIGSHAFEN)(ClinVar)	Antitrypsin alpha 1 deficiency	C0221757;C3501835	A1A|A1AT|AAT|MGC23330|MGC9222|PI|PI1|PRO2275	8941	G3V2B9:G3V387:G3V4I7:G3V544:G3V5R8:P01009	NP_000286.3:NP_001002235.1:NP_001002236.1:NP_001121172.1:NP_001121173.1:NP_001121174.1:NP_001121175.1:NP_001121176.1:NP_001121177.1:NP_001121178.1:NP_001121179.1
Matrisome-associated	ECM Regulators	SERPINA1	serpin peptidase inhibitor, clade A (alpha-1 antiproteinase, antitrypsin), member 1	8941	p.LEU377PHE	PI NULL(MATTAWA)(ClinVar)	PI NULL(MATTAWA)	C4015816	A1A|A1AT|AAT|MGC23330|MGC9222|PI|PI1|PRO2275	8941	G3V2B9:G3V387:G3V4I7:G3V544:G3V5R8:P01009	NP_000286.3:NP_001002235.1:NP_001002236.1:NP_001121172.1:NP_001121173.1:NP_001121174.1:NP_001121175.1:NP_001121176.1:NP_001121177.1:NP_001121178.1:NP_001121179.1
Matrisome-associated	ECM Regulators	SERPINA1	serpin peptidase inhibitor, clade A (alpha-1 antiproteinase, antitrypsin), member 1	8941	p.LEU65PRO	PI M(PROCIDA)(ClinVar)	Antitrypsin alpha 1 deficiency	C0221757;C3501835	A1A|A1AT|AAT|MGC23330|MGC9222|PI|PI1|PRO2275	8941	G3V2B9:G3V387:G3V4I7:G3V544:G3V5R8:P01009	NP_000286.3:NP_001002235.1:NP_001002236.1:NP_001121172.1:NP_001121173.1:NP_001121174.1:NP_001121175.1:NP_001121176.1:NP_001121177.1:NP_001121178.1:NP_001121179.1
Matrisome-associated	ECM Regulators	SERPINA1	serpin peptidase inhibitor, clade A (alpha-1 antiproteinase, antitrypsin), member 1	8941	p.LYS241TER	PI NULL(BELLINGHAM)|PI Q0(BELLINGHAM)(ClinVar)	Antitrypsin alpha 1 deficiency	C0221757;C3501835	A1A|A1AT|AAT|MGC23330|MGC9222|PI|PI1|PRO2275	8941	G3V2B9:G3V387:G3V4I7:G3V544:G3V5R8:P01009	NP_000286.3:NP_001002235.1:NP_001002236.1:NP_001121172.1:NP_001121173.1:NP_001121174.1:NP_001121175.1:NP_001121176.1:NP_001121177.1:NP_001121178.1:NP_001121179.1
Matrisome-associated	ECM Regulators	SERPINA1	serpin peptidase inhibitor, clade A (alpha-1 antiproteinase, antitrypsin), member 1	8941	p.MET382ARG	PI PITTSBURGH|'antithrombin' pittsburgh(ClinVar)	Antitrypsin alpha 1 deficiency	C0221757;C3501835	A1A|A1AT|AAT|MGC23330|MGC9222|PI|PI1|PRO2275	8941	G3V2B9:G3V387:G3V4I7:G3V544:G3V5R8:P01009	NP_000286.3:NP_001002235.1:NP_001002236.1:NP_001121172.1:NP_001121173.1:NP_001121174.1:NP_001121175.1:NP_001121176.1:NP_001121177.1:NP_001121178.1:NP_001121179.1
Matrisome-associated	ECM Regulators	SERPINA1	serpin peptidase inhibitor, clade A (alpha-1 antiproteinase, antitrypsin), member 1	8941	p.PRO393LEU	PI M(HEERLEN)(ClinVar)	Antitrypsin alpha 1 deficiency	C0221757;C3501835	A1A|A1AT|AAT|MGC23330|MGC9222|PI|PI1|PRO2275	8941	G3V2B9:G3V387:G3V4I7:G3V544:G3V5R8:P01009	NP_000286.3:NP_001002235.1:NP_001002236.1:NP_001121172.1:NP_001121173.1:NP_001121174.1:NP_001121175.1:NP_001121176.1:NP_001121177.1:NP_001121178.1:NP_001121179.1
Matrisome-associated	ECM Regulators	SERPINA1	serpin peptidase inhibitor, clade A (alpha-1 antiproteinase, antitrypsin), member 1	8941	p.SER77PHE	PI S(IIYAMA)(ClinVar)	Antitrypsin alpha 1 deficiency	C0221757;C3501835	A1A|A1AT|AAT|MGC23330|MGC9222|PI|PI1|PRO2275	8941	G3V2B9:G3V387:G3V4I7:G3V544:G3V5R8:P01009	NP_000286.3:NP_001002235.1:NP_001002236.1:NP_001121172.1:NP_001121173.1:NP_001121174.1:NP_001121175.1:NP_001121176.1:NP_001121177.1:NP_001121178.1:NP_001121179.1
Matrisome-associated	ECM Regulators	SERPINA1	serpin peptidase inhibitor, clade A (alpha-1 antiproteinase, antitrypsin), member 1	8941	p.THR109MET	PI Z(BRISTOL)(ClinVar)	Antitrypsin alpha 1 deficiency	C0221757;C3501835	A1A|A1AT|AAT|MGC23330|MGC9222|PI|PI1|PRO2275	8941	G3V2B9:G3V387:G3V4I7:G3V544:G3V5R8:P01009	NP_000286.3:NP_001002235.1:NP_001002236.1:NP_001121172.1:NP_001121173.1:NP_001121174.1:NP_001121175.1:NP_001121176.1:NP_001121177.1:NP_001121178.1:NP_001121179.1
Matrisome-associated	ECM Regulators	SERPINA1	serpin peptidase inhibitor, clade A (alpha-1 antiproteinase, antitrypsin), member 1	8941	p.VAL237ALA	PI M1-ALA213|PI\x2c M1A(ClinVar)	PI M1-ALA213	C4015796	A1A|A1AT|AAT|MGC23330|MGC9222|PI|PI1|PRO2275	8941	G3V2B9:G3V387:G3V4I7:G3V544:G3V5R8:P01009	NP_000286.3:NP_001002235.1:NP_001002236.1:NP_001121172.1:NP_001121173.1:NP_001121174.1:NP_001121175.1:NP_001121176.1:NP_001121177.1:NP_001121178.1:NP_001121179.1
Matrisome-associated	ECM Regulators	SERPINA10	serpin peptidase inhibitor, clade A (alpha-1 antiproteinase, antitrypsin), member 10	15996	p.TRP324TER	Venous thrombosis\x2c susceptibility to(ClinVar)	Venous thromboembolic disease	C1997614	PZI|ZPI	15996	G3V2W1:Q9UK55	NP_001094077.1:NP_057270.1:XP_005267790.1:XP_006725227.1:XP_006720222.1:XP_006725226.1
Matrisome-associated	ECM Regulators	SERPINA3	serpin peptidase inhibitor, clade A (alpha-1 antiproteinase, antitrypsin), member 3	16	p.LEU78PRO	Antichymotrypsin Bochum 1(ClinVar)	Antichymotrypsin Bochum 1	C4015793	AACT|ACT|GIG24|GIG25|MGC88254	16	G3V3A0:G3V595:P01011	NP_001076.2
Matrisome-associated	ECM Regulators	SERPINA3	serpin peptidase inhibitor, clade A (alpha-1 antiproteinase, antitrypsin), member 3	16	p.MET414VAL	Antichymotrypsin Isehara 1(ClinVar)	Antichymotrypsin Isehara 1	C4015791	AACT|ACT|GIG24|GIG25|MGC88254	16	G3V3A0:G3V595:P01011	NP_001076.2
Matrisome-associated	ECM Regulators	SERPINA3	serpin peptidase inhibitor, clade A (alpha-1 antiproteinase, antitrypsin), member 3	16	p.PRO252ALA	Antichymotrypsin bonn 1(ClinVar)	Antichymotrypsin bonn 1	C4015794	AACT|ACT|GIG24|GIG25|MGC88254	16	G3V3A0:G3V595:P01011	NP_001076.2
Matrisome-associated	ECM Regulators	SERPINA7	serpin peptidase inhibitor, clade A (alpha-1 antiproteinase, antitrypsin), member 7	11583	p.ALA133PRO	Thyroxine-binding globulin deficiency\x2c partial\x2c montreal type|Thyroxine-binding globulin\x2c montreal|TBG-MONTREAL(ClinVar)	Thyroxine-binding globulin deficiency	C1839141	TBG	11583	P05543	NP_000345.2
Matrisome-associated	ECM Regulators	SERPINA7	serpin peptidase inhibitor, clade A (alpha-1 antiproteinase, antitrypsin), member 7	11583	p.ALA211THR	Thyroxine-binding globulin\x2c variant a|TBG-A|TBG-ABORIGINE(ClinVar)	Thyroxine-binding globulin deficiency	C1839141	TBG	11583	P05543	NP_000345.2
Matrisome-associated	ECM Regulators	SERPINA7	serpin peptidase inhibitor, clade A (alpha-1 antiproteinase, antitrypsin), member 7	11583	p.ASP191ASN	Thyroxine-binding globulin\x2c slow|TBG-S(ClinVar)	Thyroxine-binding globulin, slow	C4016583	TBG	11583	P05543	NP_000345.2
Matrisome-associated	ECM Regulators	SERPINA7	serpin peptidase inhibitor, clade A (alpha-1 antiproteinase, antitrypsin), member 7	11583	p.HIS351TYR	Thyroxine-binding globulin deficiency\x2c partial\x2c quebec type|Thyroxine-binding globulin\x2c quebec|TBG-QUEBEC(ClinVar)	Thyroxine-binding globulin deficiency	C1839141	TBG	11583	P05543	NP_000345.2
Matrisome-associated	ECM Regulators	SERPINA7	serpin peptidase inhibitor, clade A (alpha-1 antiproteinase, antitrypsin), member 7	11583	p.ILE116ASN	Thyroxine-binding globulin deficiency\x2c partial\x2c gary type|Thyroxine-binding globulin\x2c gary|TBG-GARY(ClinVar)	Thyroxine-binding globulin deficiency	C1839141	TBG	11583	P05543	NP_000345.2
Matrisome-associated	ECM Regulators	SERPINA7	serpin peptidase inhibitor, clade A (alpha-1 antiproteinase, antitrypsin), member 7	11583	p.LEU247PRO	Thyroxine-binding globulin deficiency\x2c complete|Complete deficiency 5(ClinVar)	Thyroxine-binding globulin deficiency	C1839141	TBG	11583	P05543	NP_000345.2
Matrisome-associated	ECM Regulators	SERPINA7	serpin peptidase inhibitor, clade A (alpha-1 antiproteinase, antitrypsin), member 7	11583	p.LEU303PHE	Thyroxine-binding globulin\x2c variant p|TBG-P(ClinVar)	Thyroxine-binding globulin deficiency	C1839141	TBG	11583	P05543	NP_000345.2
Matrisome-associated	ECM Regulators	SERPINA7	serpin peptidase inhibitor, clade A (alpha-1 antiproteinase, antitrypsin), member 7	11583	p.PRO383LEU	Thyroxine-binding globulin deficiency\x2c partial\x2c japanese type|TBG-PDJ(ClinVar)	Thyroxine-binding globulin deficiency	C1839141	TBG	11583	P05543	NP_000345.2
Matrisome-associated	ECM Regulators	SERPINA7	serpin peptidase inhibitor, clade A (alpha-1 antiproteinase, antitrypsin), member 7	11583	p.TRP300TER	Thyroxine-binding globulin deficiency\x2c complete\x2c buffalo type|Thyroxine-binding globulin\x2c buffalo|TBG-BUFFALO(ClinVar)	Thyroxine-binding globulin deficiency	C1839141	TBG	11583	P05543	NP_000345.2
Matrisome-associated	ECM Regulators	SERPINA7	serpin peptidase inhibitor, clade A (alpha-1 antiproteinase, antitrypsin), member 7	11583	p.TYR329PHE	Thyroxine-binding globulin\x2c chicago|TBG-CHICAGO(ClinVar)	Thyroxine-binding globulin deficiency	C1839141	TBG	11583	P05543	NP_000345.2
Matrisome-associated	ECM Regulators	SERPINB6	serpin peptidase inhibitor, clade B (ovalbumin), member 6	8950	p.GLU245TER	Deafness\x2c autosomal recessive 91(ClinVar)	DEAFNESS, AUTOSOMAL RECESSIVE 91	C3150704	CAP|DKFZp686I04222|MGC111370|MSTP057|PI6|PTI|SPI3	8950	P35237	NP_001182220.2:NP_001258751.1:NP_001258752.1:NP_001258753.1:NP_001258754.1:NP_004559.4
Matrisome-associated	ECM Regulators	SERPINC1	serpin peptidase inhibitor, clade C (antithrombin), member 1	775	p.ALA416SER	.,Antithrombin III deficiency(ClinVar)	Antithrombin deficiency	C0272375	AT3|ATIII|MGC22579	775	P01008	NP_000479.1
Matrisome-associated	ECM Regulators	SERPINC1	serpin peptidase inhibitor, clade C (antithrombin), member 1	775	p.ARG161TER	Antithrombin III deficiency(ClinVar)	Antithrombin deficiency	C0272375	AT3|ATIII|MGC22579	775	P01008	NP_000479.1
Matrisome-associated	ECM Regulators	SERPINC1	serpin peptidase inhibitor, clade C (antithrombin), member 1	775	p.ARG425PRO	Antithrombin III deficiency,Antithrombin III deficiency(ClinVar)	Antithrombin deficiency	C0272375	AT3|ATIII|MGC22579	775	P01008	NP_000479.1
Matrisome-associated	ECM Regulators	SERPINC1	serpin peptidase inhibitor, clade C (antithrombin), member 1	775	p.ARG79CYS	Antithrombin III deficiency,Antithrombin III deficiency(ClinVar)	Antithrombin deficiency	C0272375	AT3|ATIII|MGC22579	775	P01008	NP_000479.1
Matrisome-associated	ECM Regulators	SERPINC1	serpin peptidase inhibitor, clade C (antithrombin), member 1	775	p.ASN167THR	Antithrombin III deficiency(ClinVar)	Antithrombin deficiency	C0272375	AT3|ATIII|MGC22579	775	P01008	NP_000479.1
Matrisome-associated	ECM Regulators	SERPIND1	serpin peptidase inhibitor, clade D (heparin cofactor), member 1	4838	p.ARG208HIS	Heparin cofactor II deficiency(ClinVar)	Heparin cofactor II deficiency	C0398626	D22S673|HC2|HCF2|HCII|HLS2|LS2	4838	P05546	NP_000176.2:XP_005261654.1
Matrisome-associated	ECM Regulators	SERPIND1	serpin peptidase inhibitor, clade D (heparin cofactor), member 1	4838	p.PRO462LEU	Heparin cofactor II deficiency(ClinVar)	Heparin cofactor II deficiency	C0398626	D22S673|HC2|HCF2|HCII|HLS2|LS2	4838	P05546	NP_000176.2:XP_005261654.1
Matrisome-associated	ECM Regulators	SERPINE1	serpin peptidase inhibitor, clade E (nexin, plasminogen activator inhibitor type 1), member 1	8583	p.ALA15THR	Plasminogen activator inhibitor type 1 deficiency(ClinVar)	PLASMINOGEN ACTIVATOR INHIBITOR-1 DEFICIENCY	C2750067	PAI|PAI-1|PAI1|PLANH1	8583	P05121	NP_000593.1
Matrisome-associated	ECM Regulators	SERPINF1	serpin peptidase inhibitor, clade F (alpha-2 antiplasmin, pigment epithelium derived factor), member 1	8824	p.GLN378TER	Osteogenesis imperfecta type 12|not specified(ClinVar)	Osteogenesis imperfecta	C0029434	EPC-1|PEDF|PIG35	8824	I3L107:I3L1U4:I3L2R7:I3L3Z3:I3L425:I3L4F9:I3L4N7:I3L4Z0:P36955	NP_002606.3
Matrisome-associated	ECM Regulators	SERPINF1	serpin peptidase inhibitor, clade F (alpha-2 antiplasmin, pigment epithelium derived factor), member 1	8824	p.TYR232TER	Osteogenesis imperfecta type 12|not specified(ClinVar)	Osteogenesis imperfecta	C0029434	EPC-1|PEDF|PIG35	8824	I3L107:I3L1U4:I3L2R7:I3L3Z3:I3L425:I3L4F9:I3L4N7:I3L4Z0:P36955	NP_002606.3
Matrisome-associated	ECM Regulators	SERPINF2	serpin peptidase inhibitor, clade F (alpha-2 antiplasmin, pigment epithelium derived factor), member 2	9075	p.VAL411MET	Anti-plasmin deficiency\x2c congenital(ClinVar)	Alpha-2-plasmin inhibitor deficiency	C2752081	A2AP|AAP|ALPHA-2-PI|API|PLI	9075	C9JMH6:C9JPV4:P08697	NP_000925.2:NP_001159392.1:NP_001159393.1:XP_005256758.1
Matrisome-associated	ECM Regulators	SERPING1	serpin peptidase inhibitor, clade G (C1 inhibitor), member 1	1228	p.ALA458THR	Hereditary angioedema\x2c type II(ClinVar)	Angioneurotic oedema	C0002994	C1IN|C1INH|C1NH|HAE1|HAE2	1228	B4E1F0:B4E1H2:B5MCB9:C9JZJ9:E9PGN7:E9PK97:H0YCA1:H9KV48:P05155	NP_000053.2:NP_001027466.1
Matrisome-associated	ECM Regulators	SERPING1	serpin peptidase inhibitor, clade G (C1 inhibitor), member 1	1228	p.ALA465VAL	Complement component 4\x2c partial deficiency of\x2c due to dysfunctional c1 inhibitor(ClinVar)	Angioneurotic oedema	C0002994	C1IN|C1INH|C1NH|HAE1|HAE2	1228	B4E1F0:B4E1H2:B5MCB9:C9JZJ9:E9PGN7:E9PK97:H0YCA1:H9KV48:P05155	NP_000053.2:NP_001027466.1
Matrisome-associated	ECM Regulators	SERPING1	serpin peptidase inhibitor, clade G (C1 inhibitor), member 1	1228	p.ARG466HIS	Hereditary angioedema\x2c type II,.(ClinVar)	Angioneurotic oedema	C0002994	C1IN|C1INH|C1NH|HAE1|HAE2	1228	B4E1F0:B4E1H2:B5MCB9:C9JZJ9:E9PGN7:E9PK97:H0YCA1:H9KV48:P05155	NP_000053.2:NP_001027466.1
Matrisome-associated	ECM Regulators	SERPING1	serpin peptidase inhibitor, clade G (C1 inhibitor), member 1	1228	p.ARG466SER	Hereditary angioedema\x2c type II,Hereditary angioedema\x2c type II(ClinVar)	Angioneurotic oedema	C0002994	C1IN|C1INH|C1NH|HAE1|HAE2	1228	B4E1F0:B4E1H2:B5MCB9:C9JZJ9:E9PGN7:E9PK97:H0YCA1:H9KV48:P05155	NP_000053.2:NP_001027466.1
Matrisome-associated	ECM Regulators	SERPING1	serpin peptidase inhibitor, clade G (C1 inhibitor), member 1	1228	p.TYR199TER	Hereditary angioneurotic edema(ClinVar)	ANGIOEDEMA, HEREDITARY, TYPE I	C2717906	C1IN|C1INH|C1NH|HAE1|HAE2	1228	B4E1F0:B4E1H2:B5MCB9:C9JZJ9:E9PGN7:E9PK97:H0YCA1:H9KV48:P05155	NP_000053.2:NP_001027466.1
Matrisome-associated	ECM Regulators	SERPING1	serpin peptidase inhibitor, clade G (C1 inhibitor), member 1	1228	p.VAL454GLU	Hereditary angioedema\x2c type II(ClinVar)	Angioneurotic oedema	C0002994	C1IN|C1INH|C1NH|HAE1|HAE2	1228	B4E1F0:B4E1H2:B5MCB9:C9JZJ9:E9PGN7:E9PK97:H0YCA1:H9KV48:P05155	NP_000053.2:NP_001027466.1
Matrisome-associated	ECM Regulators	SERPINI1	serpin peptidase inhibitor, clade I (neuroserpin), member 1	8943	p.GLY392ARG	Familial encephalopathy with neuroserpin inclusion bodies(ClinVar)	ENCEPHALOPATHY, FAMILIAL, WITH NEUROSERPIN INCLUSION BODIES	C1858680	DKFZp781N13156|PI12|neuroserpin	8943	C9JDY5:C9JQU8:H7C5T9:Q99574	NP_001116224.1:NP_005016.1:XP_006713720.1
Matrisome-associated	ECM Regulators	SERPINI1	serpin peptidase inhibitor, clade I (neuroserpin), member 1	8943	p.GLY392GLU	Familial encephalopathy with neuroserpin inclusion bodies(ClinVar)	Dementia, familial	C0751071	DKFZp781N13156|PI12|neuroserpin	8943	C9JDY5:C9JQU8:H7C5T9:Q99574	NP_001116224.1:NP_005016.1:XP_006713720.1
Matrisome-associated	ECM Regulators	SERPINI1	serpin peptidase inhibitor, clade I (neuroserpin), member 1	8943	p.HIS338ARG	Familial encephalopathy with neuroserpin inclusion bodies(ClinVar)	Dementia, familial	C0751071	DKFZp781N13156|PI12|neuroserpin	8943	C9JDY5:C9JQU8:H7C5T9:Q99574	NP_001116224.1:NP_005016.1:XP_006713720.1
Matrisome-associated	ECM Regulators	ST14	suppression of tumorigenicity 14 (colon carcinoma)	11344	p.GLY827ARG	Ichthyosis with hypotrichosis\x2c autosomal recessive(ClinVar)	ARIH	C1835851	HAI|MT-SP1|MTSP1|PRSS14|SNC19|TADG15	11344	Q9Y5Y6	NP_068813.1
Matrisome-associated	ECM Regulators	ST14	suppression of tumorigenicity 14 (colon carcinoma)	11344	p.MET1ILE	Ichthyosis with hypotrichosis\x2c autosomal recessive(ClinVar)	Ichthyosis with hypotrichosis, autosomal recessive	C1835851	HAI|MT-SP1|MTSP1|PRSS14|SNC19|TADG15	11344	Q9Y5Y6	NP_068813.1
Matrisome-associated	ECM Regulators	TGM1	transglutaminase 1 (K polypeptide epidermal type I, protein-glutamine-gamma-glutamyltransferase)	11777	p.ARG142CYS	Congenital ichthyosis of skin(ClinVar)	Congenital ichthyosis of skin	C0020758	ICR2|KTG|LI|LI1|TGASE|TGK	11777	B4DWR7:H0YKI6:H0YLJ6:H0YLT9:H0YMQ8:H0YN27:H0YNM4:P22735	NP_000350.1
Matrisome-associated	ECM Regulators	TGM1	transglutaminase 1 (K polypeptide epidermal type I, protein-glutamine-gamma-glutamyltransferase)	11777	p.ARG142HIS	Congenital ichthyosis of skin(ClinVar)	Congenital ichthyosis of skin	C0020758	ICR2|KTG|LI|LI1|TGASE|TGK	11777	B4DWR7:H0YKI6:H0YLJ6:H0YLT9:H0YMQ8:H0YN27:H0YNM4:P22735	NP_000350.1
Matrisome-associated	ECM Regulators	TGM1	transglutaminase 1 (K polypeptide epidermal type I, protein-glutamine-gamma-glutamyltransferase)	11777	p.ARG143HIS	Congenital ichthyosis of skin(ClinVar)	Congenital ichthyosis of skin	C0020758	ICR2|KTG|LI|LI1|TGASE|TGK	11777	B4DWR7:H0YKI6:H0YLJ6:H0YLT9:H0YMQ8:H0YN27:H0YNM4:P22735	NP_000350.1
Matrisome-associated	ECM Regulators	TGM1	transglutaminase 1 (K polypeptide epidermal type I, protein-glutamine-gamma-glutamyltransferase)	11777	p.ARG286GLN	Congenital ichthyosis of skin(ClinVar)	Congenital ichthyosis of skin	C0020758	ICR2|KTG|LI|LI1|TGASE|TGK	11777	B4DWR7:H0YKI6:H0YLJ6:H0YLT9:H0YMQ8:H0YN27:H0YNM4:P22735	NP_000350.1
Matrisome-associated	ECM Regulators	TGM1	transglutaminase 1 (K polypeptide epidermal type I, protein-glutamine-gamma-glutamyltransferase)	11777	p.ARG307TRP	Congenital ichthyosis of skin(ClinVar)	Congenital ichthyosis of skin	C0020758	ICR2|KTG|LI|LI1|TGASE|TGK	11777	B4DWR7:H0YKI6:H0YLJ6:H0YLT9:H0YMQ8:H0YN27:H0YNM4:P22735	NP_000350.1
Matrisome-associated	ECM Regulators	TGM1	transglutaminase 1 (K polypeptide epidermal type I, protein-glutamine-gamma-glutamyltransferase)	11777	p.ARG323GLN	Congenital ichthyosis of skin(ClinVar)	Congenital ichthyosis of skin	C0020758	ICR2|KTG|LI|LI1|TGASE|TGK	11777	B4DWR7:H0YKI6:H0YLJ6:H0YLT9:H0YMQ8:H0YN27:H0YNM4:P22735	NP_000350.1
Matrisome-associated	ECM Regulators	TGM1	transglutaminase 1 (K polypeptide epidermal type I, protein-glutamine-gamma-glutamyltransferase)	11777	p.ARG389HIS	Congenital ichthyosis of skin(ClinVar)	Congenital ichthyosis of skin	C0020758	ICR2|KTG|LI|LI1|TGASE|TGK	11777	B4DWR7:H0YKI6:H0YLJ6:H0YLT9:H0YMQ8:H0YN27:H0YNM4:P22735	NP_000350.1
Matrisome-associated	ECM Regulators	TGM1	transglutaminase 1 (K polypeptide epidermal type I, protein-glutamine-gamma-glutamyltransferase)	11777	p.ARG396LEU	Congenital ichthyosis of skin(ClinVar)	Congenital ichthyosis of skin	C0020758	ICR2|KTG|LI|LI1|TGASE|TGK	11777	B4DWR7:H0YKI6:H0YLJ6:H0YLT9:H0YMQ8:H0YN27:H0YNM4:P22735	NP_000350.1
Matrisome-associated	ECM Regulators	TGM1	transglutaminase 1 (K polypeptide epidermal type I, protein-glutamine-gamma-glutamyltransferase)	11777	p.ASN289SER	Congenital ichthyosis of skin(ClinVar)	Congenital ichthyosis of skin	C0020758	ICR2|KTG|LI|LI1|TGASE|TGK	11777	B4DWR7:H0YKI6:H0YLJ6:H0YLT9:H0YMQ8:H0YN27:H0YNM4:P22735	NP_000350.1
Matrisome-associated	ECM Regulators	TGM1	transglutaminase 1 (K polypeptide epidermal type I, protein-glutamine-gamma-glutamyltransferase)	11777	p.ASP490GLY	Congenital ichthyosis of skin(ClinVar)	Congenital ichthyosis of skin	C0020758	ICR2|KTG|LI|LI1|TGASE|TGK	11777	B4DWR7:H0YKI6:H0YLJ6:H0YLT9:H0YMQ8:H0YN27:H0YNM4:P22735	NP_000350.1
Matrisome-associated	ECM Regulators	TGM1	transglutaminase 1 (K polypeptide epidermal type I, protein-glutamine-gamma-glutamyltransferase)	11777	p.GLY218SER	Congenital ichthyosis of skin(ClinVar)	Congenital ichthyosis of skin	C0020758	ICR2|KTG|LI|LI1|TGASE|TGK	11777	B4DWR7:H0YKI6:H0YLJ6:H0YLT9:H0YMQ8:H0YN27:H0YNM4:P22735	NP_000350.1
Matrisome-associated	ECM Regulators	TGM1	transglutaminase 1 (K polypeptide epidermal type I, protein-glutamine-gamma-glutamyltransferase)	11777	p.GLY278ARG	Congenital ichthyosis of skin(ClinVar)	Congenital ichthyosis of skin	C0020758	ICR2|KTG|LI|LI1|TGASE|TGK	11777	B4DWR7:H0YKI6:H0YLJ6:H0YLT9:H0YMQ8:H0YN27:H0YNM4:P22735	NP_000350.1
Matrisome-associated	ECM Regulators	TGM1	transglutaminase 1 (K polypeptide epidermal type I, protein-glutamine-gamma-glutamyltransferase)	11777	p.GLY392ASP	Congenital ichthyosis of skin(ClinVar)	Congenital ichthyosis of skin	C0020758	ICR2|KTG|LI|LI1|TGASE|TGK	11777	B4DWR7:H0YKI6:H0YLJ6:H0YLT9:H0YMQ8:H0YN27:H0YNM4:P22735	NP_000350.1
Matrisome-associated	ECM Regulators	TGM1	transglutaminase 1 (K polypeptide epidermal type I, protein-glutamine-gamma-glutamyltransferase)	11777	p.GLY94ASP	Congenital ichthyosis of skin(ClinVar)	Congenital ichthyosis of skin	C0020758	ICR2|KTG|LI|LI1|TGASE|TGK	11777	B4DWR7:H0YKI6:H0YLJ6:H0YLT9:H0YMQ8:H0YN27:H0YNM4:P22735	NP_000350.1
Matrisome-associated	ECM Regulators	TGM1	transglutaminase 1 (K polypeptide epidermal type I, protein-glutamine-gamma-glutamyltransferase)	11777	p.SER160CYS	Congenital ichthyosis of skin(ClinVar)	Congenital ichthyosis of skin	C0020758	ICR2|KTG|LI|LI1|TGASE|TGK	11777	B4DWR7:H0YKI6:H0YLJ6:H0YLT9:H0YMQ8:H0YN27:H0YNM4:P22735	NP_000350.1
Matrisome-associated	ECM Regulators	TGM1	transglutaminase 1 (K polypeptide epidermal type I, protein-glutamine-gamma-glutamyltransferase)	11777	p.SER42TYR	Congenital ichthyosis of skin(ClinVar)	Congenital ichthyosis of skin	C0020758	ICR2|KTG|LI|LI1|TGASE|TGK	11777	B4DWR7:H0YKI6:H0YLJ6:H0YLT9:H0YMQ8:H0YN27:H0YNM4:P22735	NP_000350.1
Matrisome-associated	ECM Regulators	TGM1	transglutaminase 1 (K polypeptide epidermal type I, protein-glutamine-gamma-glutamyltransferase)	11777	p.VAL379LEU	Congenital ichthyosis of skin(ClinVar)	Congenital ichthyosis of skin	C0020758	ICR2|KTG|LI|LI1|TGASE|TGK	11777	B4DWR7:H0YKI6:H0YLJ6:H0YLT9:H0YMQ8:H0YN27:H0YNM4:P22735	NP_000350.1
Matrisome-associated	ECM Regulators	TGM1	transglutaminase 1 (K polypeptide epidermal type I, protein-glutamine-gamma-glutamyltransferase)	11777	p.VAL383MET	Congenital ichthyosis of skin(ClinVar)	Congenital ichthyosis of skin	C0020758	ICR2|KTG|LI|LI1|TGASE|TGK	11777	B4DWR7:H0YKI6:H0YLJ6:H0YLT9:H0YMQ8:H0YN27:H0YNM4:P22735	NP_000350.1
Matrisome-associated	ECM Regulators	TGM1	transglutaminase 1 (K polypeptide epidermal type I, protein-glutamine-gamma-glutamyltransferase)	11777	p.VAL518MET	Congenital ichthyosis of skin(ClinVar)	Congenital ichthyosis of skin	C0020758	ICR2|KTG|LI|LI1|TGASE|TGK	11777	B4DWR7:H0YKI6:H0YLJ6:H0YLT9:H0YMQ8:H0YN27:H0YNM4:P22735	NP_000350.1
Matrisome-associated	ECM Regulators	TGM5	transglutaminase 5	11781	p.GLY113CYS	Peeling skin syndrome\x2c acral type(ClinVar)	Acral peeling skin syndrome	C1853354	MGC141907|TGASE5|TGASEX|TGM6|TGMX|TGX	11781	O43548	NP_004236.1:NP_963925.2
Matrisome-associated	ECM Regulators	TIMP3	TIMP metallopeptidase inhibitor 3	11822	p.GLU162TER	Sorsby fundus dystrophy(ClinVar)	Fundus dystrophy, Sorsby	C0339515	HSMRK222|K222|K222TA2|SFD	11822	P35625	NP_000353.1
Matrisome-associated	ECM Regulators	TIMP3	TIMP metallopeptidase inhibitor 3	11822	p.GLY189CYS	Sorsby fundus dystrophy\x2c lavia type(ClinVar)	Fundus dystrophy, Sorsby	C0339515	HSMRK222|K222|K222TA2|SFD	11822	P35625	NP_000353.1
Matrisome-associated	ECM Regulators	TLL1	tolloid-like 1	11843	p.ILE629VAL	Atrial septal defect 6(ClinVar)	Atrial septal defect	C0018817	ASD6|TLL	11843	D6RAK5:D6RBI6:D6RCE0:E9PD25:O43897	NP_001191689.1:NP_036596.3
Matrisome-associated	ECM Regulators	TLL1	tolloid-like 1	11843	p.MET182LEU	Atrial septal defect 6(ClinVar)	Atrial septal defect	C0018817	ASD6|TLL	11843	D6RAK5:D6RBI6:D6RCE0:E9PD25:O43897	NP_001191689.1:NP_036596.3
Matrisome-associated	ECM Regulators	TLL1	tolloid-like 1	11843	p.VAL238ALA	Atrial septal defect 6(ClinVar)	Atrial septal defect	C0018817	ASD6|TLL	11843	D6RAK5:D6RBI6:D6RCE0:E9PD25:O43897	NP_001191689.1:NP_036596.3
Matrisome-associated	ECM Regulators	TMPRSS15	protease, serine, 7 (enterokinase)	9490	p.ARG857TER	Enterokinase deficiency(ClinVar)	ENTEROKINASE DEFICIENCY	C0268416	ENTK|MGC133046|TMPRSS15|PRSS7	9490	E9PG70:P98073	NP_002763.2
Matrisome-associated	ECM Regulators	TMPRSS15	protease, serine, 7 (enterokinase)	9490	p.GLN261TER	Enterokinase deficiency(ClinVar)	ENTEROKINASE DEFICIENCY	C0268416	ENTK|MGC133046|TMPRSS15|PRSS7	9490	E9PG70:P98073	NP_002763.2
Matrisome-associated	ECM Regulators	TMPRSS15	protease, serine, 7 (enterokinase)	9490	p.SER712TER	Enterokinase deficiency(ClinVar)	ENTEROKINASE DEFICIENCY	C0268416	ENTK|MGC133046|TMPRSS15|PRSS7	9490	E9PG70:P98073	NP_002763.2
Matrisome-associated	ECM-affiliated Proteins	C1QA	complement component 1, q subcomponent, A chain	1241	p.GLN208TER	C1q deficiency(ClinVar)	C1q deficiency	C3150902	-	1241	P02745:X6RLJ0	NP_057075.1
Matrisome-associated	ECM-affiliated Proteins	CLEC7A	C-type lectin domain family 7, member A	14558	p.TYR238TER	Candidiasis\x2c familial\x2c 4|Aspergillosis\x2c susceptibility to(ClinVar)	ASPERGILLOSIS	C0004030	BGR|CANDF4|CLECSF12|DECTIN1	14558	Q68D78:Q9BXN2	NP_072092.2:NP_922938.1:NP_922939.1:NP_922940.1:NP_922941.1:NP_072092.2:NP_922938.1:NP_922939.1:NP_922940.1:NP_922941.1:NP_922945.1:XP_005253524.1:XP_005253525.1:XP_006719198.1:XP_006719199.1
Matrisome-associated	ECM-affiliated Proteins	FREM2	FRAS1 related extracellular matrix protein 2	25396	p.GLU1972LYS	Cryptophthalmos syndrome(ClinVar)	Cryptophthalmos syndrome	C0265233	DKFZp686J0811|DKFZp781I048|KIAA1074	25396	Q5SZK8	NP_997244.4
Matrisome-associated	ECM-affiliated Proteins	FREM2	FRAS1 related extracellular matrix protein 2	25396	p.GLU1974LYS	Cryptophthalmos syndrome(ClinVar)	Cryptophthalmos syndrome	C0265233	DKFZp686J0811|DKFZp781I048|KIAA1074	25396	Q5SZK8	NP_997244.4
Matrisome-associated	ECM-affiliated Proteins	GPC6	glypican 6	4454	p.ARG234TER	Omodysplasia 1(ClinVar)	OMODYSPLASIA 1	C1850318	MGC126288|OMIMD1	4454	Q9Y625	NP_005699.1
Matrisome-associated	ECM-affiliated Proteins	LMAN1	lectin, mannose-binding, 1	6631	p.MET1THR	Combined deficiency of factor V and factor VIII\x2c 1(ClinVar)	Combined deficiency of factor V and factor VIII, 1	C1856883	ERGIC-53|ERGIC53|F5F8D|FMFD1|MCFD1|MR60|gp58	6631	P49257	NP_005561.1
Matrisome-associated	ECM-affiliated Proteins	SDC3	syndecan 3	10660	p.VAL208LEU	Obesity\x2c association with(ClinVar)	Obesity, association with	C4016383	SDCN|SYND3	10660	D3DPN2:O75056	NP_055469.3
Matrisome-associated	ECM-affiliated Proteins	SEMA3E	sema domain, immunoglobulin domain (Ig), short basic domain, secreted, (semaphorin) 3E	10727	p.SER703LEU	CHARGE association(ClinVar)	CHARGE association	C0265354	KIAA0331|M-SEMAH|M-SemaK|SEMAH|coll-5	10727	C9JVH5:F8WCZ5:O15041	NP_001171600.1:NP_036563.1
Matrisome-associated	ECM-affiliated Proteins	SEMA4A	sema domain, immunoglobulin domain (Ig), transmembrane domain (TM) and short cytoplasmic domain, (semaphorin) 4A	10729	p.ARG713GLN	Retinitis Pigmentosa 35(ClinVar)	Retinitis pigmentosa	C0035334	CORD10|FLJ12287|RP35|SEMAB|SEMB	10729	Q5TCI4:Q5TCI6:Q5TCJ5:Q5TCJ7:Q9H3S1	NP_001180229.1:NP_001180230.1:NP_001180231.1:NP_071762.2
Matrisome-associated	ECM-affiliated Proteins	SEMA4A	sema domain, immunoglobulin domain (Ig), transmembrane domain (TM) and short cytoplasmic domain, (semaphorin) 4A	10729	p.ASP345HIS	Retinitis Pigmentosa 35|Cone-rod dystrophy 10(ClinVar)	CONE-ROD DYSTROPHY 10	C1846529	CORD10|FLJ12287|RP35|SEMAB|SEMB	10729	Q5TCI4:Q5TCI6:Q5TCJ5:Q5TCJ7:Q9H3S1	NP_001180229.1:NP_001180230.1:NP_001180231.1:NP_071762.2
Matrisome-associated	ECM-affiliated Proteins	SEMA4A	sema domain, immunoglobulin domain (Ig), transmembrane domain (TM) and short cytoplasmic domain, (semaphorin) 4A	10729	p.PHE350CYS	Retinitis Pigmentosa 35|Cone-rod dystrophy 10(ClinVar)	CONE-ROD DYSTROPHY 10	C1846529	CORD10|FLJ12287|RP35|SEMAB|SEMB	10729	Q5TCI4:Q5TCI6:Q5TCJ5:Q5TCJ7:Q9H3S1	NP_001180229.1:NP_001180230.1:NP_001180231.1:NP_071762.2
Matrisome-associated	ECM-affiliated Proteins	SFTPA1	surfactant protein A1	10798	p.ARG219TRP	Pulmonary fibrosis\x2c idiopathic\x2c susceptibility to(ClinVar)	Idiopathic pulmonary fibrosis	C0085786;C1800706	AC068139.6|COLEC4|FLJ50593|FLJ51913|FLJ61144|FLJ77	10798	B4DNW5:J3KPA7:Q8IWL2	NP_001087239.2:NP_001158116.1:NP_001158119.1:NP_005402.3:XP_005270119.1:XP_006718016.1
Matrisome-associated	ECM-affiliated Proteins	SFTPA2	surfactant protein A2	10799	p.GLY231VAL	Idiopathic fibrosing alveolitis\x2c chronic form(ClinVar)	Idiopathic fibrosing alveolitis, chronic form	C0085786;C1800706	COLEC5|FLJ50594|FLJ50597|FLJ51953|FLJ79091|FLJ9367	10799	Q8IWL1:R4GMN3:X6REF7	NP_001092138.1:XP_005270188.1:XP_005270189.1
Matrisome-associated	ECM-affiliated Proteins	SFTPA2	surfactant protein A2	10799	p.PHE198SER	Idiopathic fibrosing alveolitis\x2c chronic form(ClinVar)	Idiopathic fibrosing alveolitis, chronic form	C0085786;C1800706	COLEC5|FLJ50594|FLJ50597|FLJ51953|FLJ79091|FLJ9367	10799	Q8IWL1:R4GMN3:X6REF7	NP_001092138.1:XP_005270188.1:XP_005270189.1
Matrisome-associated	ECM-affiliated Proteins	SFTPB	surfactant protein B	10801	p.ARG248CYS	Surfactant metabolism dysfunction\x2c pulmonary\x2c 1(ClinVar)	Surfactant metabolism dysfunction, pulmonary, 1	C1968602	PSP-B|SFTB3|SFTP3|SMDP1|SP-B	10801	D6W5L6:H0Y7V6:P07988:U3KQT2	NP_000533.3:NP_942140.2:NP_000533.3:NP_942140.2:XP_005264544.1
Matrisome-associated	ECM-affiliated Proteins	SFTPC	surfactant protein C	10802	p.ALA116ASP	Surfactant metabolism dysfunction\x2c pulmonary\x2c 2(ClinVar)	SMDP2	C1442758;C1970470	PSP-C|SFTP2|SMDP2|SP-C	10802	C9JYF6:E5RG20:E5RG93:E5RHW5:E5RI64:E5RI92:P11686	NP_001165828.1:NP_001165881.1:NP_003009.2
Matrisome-associated	ECM-affiliated Proteins	SFTPC	surfactant protein C	10802	p.ARG167GLN	Surfactant metabolism dysfunction\x2c pulmonary\x2c 2(ClinVar)	Interstitial lung disease	C0206062	PSP-C|SFTP2|SMDP2|SP-C	10802	C9JYF6:E5RG20:E5RG93:E5RHW5:E5RI64:E5RI92:P11686	NP_001165828.1:NP_001165881.1:NP_003009.2
Matrisome-associated	ECM-affiliated Proteins	SFTPC	surfactant protein C	10802	p.GLU66LYS	Surfactant metabolism dysfunction\x2c pulmonary\x2c 2(ClinVar)	Interstitial lung disease	C0206062	PSP-C|SFTP2|SMDP2|SP-C	10802	C9JYF6:E5RG20:E5RG93:E5RHW5:E5RI64:E5RI92:P11686	NP_001165828.1:NP_001165881.1:NP_003009.2
Matrisome-associated	ECM-affiliated Proteins	SFTPC	surfactant protein C	10802	p.ILE73THR	Surfactant metabolism dysfunction\x2c pulmonary\x2c 2(ClinVar)	Interstitial lung disease	C0206062	PSP-C|SFTP2|SMDP2|SP-C	10802	C9JYF6:E5RG20:E5RG93:E5RHW5:E5RI64:E5RI92:P11686	NP_001165828.1:NP_001165881.1:NP_003009.2
Matrisome-associated	ECM-affiliated Proteins	SFTPC	surfactant protein C	10802	p.LEU188GLN	Surfactant metabolism dysfunction\x2c pulmonary\x2c 2(ClinVar)	Interstitial lung disease	C0206062	PSP-C|SFTP2|SMDP2|SP-C	10802	C9JYF6:E5RG20:E5RG93:E5RHW5:E5RI64:E5RI92:P11686	NP_001165828.1:NP_001165881.1:NP_003009.2
Matrisome-associated	ECM-affiliated Proteins	SFTPC	surfactant protein C	10802	p.LEU188PRO	Surfactant metabolism dysfunction\x2c pulmonary\x2c 2(ClinVar)	Interstitial lung disease	C0206062	PSP-C|SFTP2|SMDP2|SP-C	10802	C9JYF6:E5RG20:E5RG93:E5RHW5:E5RI64:E5RI92:P11686	NP_001165828.1:NP_001165881.1:NP_003009.2
Matrisome-associated	Secreted Factors	AMH	anti-Mullerian hormone	464	p.GLU382TER	PERSISTENT MULLERIAN DUCT SYNDROME\x2c TYPE I|Anti-mullerian hormone bruxelles(ClinVar)	PERSISTENT MULLERIAN DUCT SYNDROME, TYPE I	C3897939	MIF|MIS	464	K7EJU5:P03971	NP_000470.2
Matrisome-associated	Secreted Factors	ANGPTL3	angiopoietin-like 3	491	p.GLU129TER	Hypobetalipoproteinemia\x2c familial\x2c 2(ClinVar)	Hypobetalipoproteinemia, familial, 2	C1857970	ANGPT5	491	Q9Y5C1	NP_055310.1
Matrisome-associated	Secreted Factors	ANGPTL4	angiopoietin-like 4	16039	p.GLU40LYS	Reduced triglycerides\x2c susceptibility to(ClinVar)	Lower plasma triglyceride level	C4014555	ANGPTL2|ARP4|FIAF|HFARP|NL2|PGAR|pp1158	16039	M0QZ51:M0R0N8:M0R2X8:M0R369:M0R3A2:Q9BY76	NP_001034756.1:NP_647475.1
Matrisome-associated	Secreted Factors	BDNF	brain-derived neurotrophic factor	1033	p.VAL66MET	Memory impairment\x2c susceptibility to|Obsessive-compulsive disorder\x2c protection against|Anorexia nervosa 2|Bulimia nervosa 2|Bipolar affective disorder\x2c susceptibility to|Parkinson disease\x2c age at onset\x2c susceptibility to(ClinVar)	ANOREXIA NERVOSA, SUSCEPTIBILITY TO, 2	C1853221	MGC34632	1033	E9PMP3:P23560	NP_001137277.1:NP_001137278.1:NP_001137279.1:NP_001137280.1:NP_001137281.1:NP_001137282.1:NP_001137283.1:NP_001137284.1:NP_001137285.1:NP_001137286.1:NP_001137288.1:NP_001700.2:NP_733927.1:NP_733928.1:NP_733929.1:NP_733930.1:NP_733931.1
Matrisome-associated	Secreted Factors	BMP15	bone morphogenetic protein 15	1068	p.ALA180THR	Premature ovarian failure 4(ClinVar)	Premature ovarian failure & amenorrhoea	C0025322;C0085215	GDF9B|ODG2|POF4	1068	O95972	NP_005439.2
Matrisome-associated	Secreted Factors	BMP15	bone morphogenetic protein 15	1068	p.ARG68TRP	Premature ovarian failure 4(ClinVar)	Premature ovarian failure	C0025322;C0085215	GDF9B|ODG2|POF4	1068	O95972	NP_005439.2
Matrisome-associated	Secreted Factors	BMP15	bone morphogenetic protein 15	1068	p.ARG76CYS	Premature ovarian failure 4(ClinVar)	Premature ovarian failure & amenorrhoea	C0025322;C0085215	GDF9B|ODG2|POF4	1068	O95972	NP_005439.2
Matrisome-associated	Secreted Factors	BMP15	bone morphogenetic protein 15	1068	p.GLN211TER	Premature ovarian failure 4(ClinVar)	Premature ovarian failure	C0025322;C0085215	GDF9B|ODG2|POF4	1068	O95972	NP_005439.2
Matrisome-associated	Secreted Factors	BMP15	bone morphogenetic protein 15	1068	p.TYR235CYS	Ovarian dysgenesis 2(ClinVar)	Ovarian dysgenesis 2	C1845294	GDF9B|ODG2|POF4	1068	O95972	NP_005439.2
Matrisome-associated	Secreted Factors	BMP4	bone morphogenetic protein 4	1071	p.ALA346VAL	Orofacial cleft 11(ClinVar)	OFC11	C2677434;C2986866	BMP2B|BMP2B1|MCOPS6|OFC11|ZYME	1071	H0YLW3:H0YM53:H0YMP9:P12644:V9GYF1	NP_001193.2:NP_570911.2:NP_570912.2:XP_005268072.1
Matrisome-associated	Secreted Factors	BMP4	bone morphogenetic protein 4	1071	p.ARG287HIS	Orofacial cleft 11(ClinVar)	OFC11	C2677434;C2986866	BMP2B|BMP2B1|MCOPS6|OFC11|ZYME	1071	H0YLW3:H0YM53:H0YMP9:P12644:V9GYF1	NP_001193.2:NP_570911.2:NP_570912.2:XP_005268072.1
Matrisome-associated	Secreted Factors	BMP4	bone morphogenetic protein 4	1071	p.GLU93GLY	Microphthalmia syndromic 6(ClinVar)	Microphthalmia syndromic 6	C1864689	BMP2B|BMP2B1|MCOPS6|OFC11|ZYME	1071	H0YLW3:H0YM53:H0YMP9:P12644:V9GYF1	NP_001193.2:NP_570911.2:NP_570912.2:XP_005268072.1
Matrisome-associated	Secreted Factors	BMP4	bone morphogenetic protein 4	1071	p.SER91CYS	Orofacial cleft 11(ClinVar)	OFC11	C2677434;C2986866	BMP2B|BMP2B1|MCOPS6|OFC11|ZYME	1071	H0YLW3:H0YM53:H0YMP9:P12644:V9GYF1	NP_001193.2:NP_570911.2:NP_570912.2:XP_005268072.1
Matrisome-associated	Secreted Factors	CFC1	cripto, FRL-1, cryptic family 1	18292	p.ARG112CYS	Heterotaxy\x2c visceral\x2c 2\x2c autosomal(ClinVar)	HETEROTAXY, VISCERAL, 2, AUTOSOMAL	C1415817	CRYPTIC|FLJ77897|HTX2|MGC133213	18292	P0CG37	NP_001257349.1:NP_001257350.1:NP_115934.1
Matrisome-associated	Secreted Factors	CLCF1	cardiotrophin-like cytokine factor 1	17412	p.ARG197LEU	Cold-induced sweating syndrome 2(ClinVar)	Cold-induced sweating syndrome	C1413713;C1832409	BSF-3|BSF3|CISS2|CLC|NNT-1|NNT1|NR6	17412	Q9UBD9	NP_001159684.1:NP_037378.1
Matrisome-associated	Secreted Factors	CLCF1	cardiotrophin-like cytokine factor 1	17412	p.CYS16ARG	Cold-induced sweating syndrome 2(ClinVar)	COLD-INDUCED SWEATING SYNDROME 2	C1538472;C1853198	BSF-3|BSF3|CISS2|CLC|NNT-1|NNT1|NR6	17412	Q9UBD9	NP_001159684.1:NP_037378.1
Matrisome-associated	Secreted Factors	CLCF1	cardiotrophin-like cytokine factor 1	17412	p.TER216ARG	Cold-induced sweating syndrome 2(ClinVar)	Cold-induced sweating syndrome 2	C1538472;C1853198	BSF-3|BSF3|CISS2|CLC|NNT-1|NNT1|NR6	17412	Q9UBD9	NP_001159684.1:NP_037378.1
Matrisome-associated	Secreted Factors	CLCF1	cardiotrophin-like cytokine factor 1	17412	p.TYR107TER	Cold-induced sweating syndrome 2(ClinVar)	Cold-induced sweating syndrome	C1413713;C1832409	BSF-3|BSF3|CISS2|CLC|NNT-1|NNT1|NR6	17412	Q9UBD9	NP_001159684.1:NP_037378.1
Matrisome-associated	Secreted Factors	CRLF1	cytokine receptor-like factor 1	2364	p.ARG277TER	Cold-induced sweating syndrome 1(ClinVar)	COLD-INDUCED SWEATING SYNDROME 1	C1848947	CISS|CISS1|CLF|CLF-1|NR6|zcytor5	2364	M0QZL6:O75462	NP_004741.1
Matrisome-associated	Secreted Factors	CRLF1	cytokine receptor-like factor 1	2364	p.ARG312HIS	Cold-induced sweating syndrome 1(ClinVar)	Cold-induced sweating syndrome 1	C1848947	CISS|CISS1|CLF|CLF-1|NR6|zcytor5	2364	M0QZL6:O75462	NP_004741.1
Matrisome-associated	Secreted Factors	CRLF1	cytokine receptor-like factor 1	2364	p.ARG81HIS	Cold-induced sweating syndrome 1|Cold-induced sweating syndrome 1(ClinVar)	Cold Induced Sweating Syndrome	C1413713;C1832409	CISS|CISS1|CLF|CLF-1|NR6|zcytor5	2364	M0QZL6:O75462	NP_004741.1
Matrisome-associated	Secreted Factors	CRLF1	cytokine receptor-like factor 1	2364	p.GLN180TER	Cold-induced sweating syndrome 1(ClinVar)	Cold Induced Sweating Syndrome	C1413713;C1832409	CISS|CISS1|CLF|CLF-1|NR6|zcytor5	2364	M0QZL6:O75462	NP_004741.1
Matrisome-associated	Secreted Factors	CRLF1	cytokine receptor-like factor 1	2364	p.LEU374ARG	Cold-induced sweating syndrome 1|Cold-induced sweating syndrome 1(ClinVar)	Cold Induced Sweating Syndrome	C1413713;C1832409	CISS|CISS1|CLF|CLF-1|NR6|zcytor5	2364	M0QZL6:O75462	NP_004741.1
Matrisome-associated	Secreted Factors	CRLF1	cytokine receptor-like factor 1	2364	p.LYS368TER	Cold-induced sweating syndrome 1(ClinVar)	COLD-INDUCED SWEATING SYNDROME 1	C1848947	CISS|CISS1|CLF|CLF-1|NR6|zcytor5	2364	M0QZL6:O75462	NP_004741.1
Matrisome-associated	Secreted Factors	CRLF1	cytokine receptor-like factor 1	2364	p.PRO138LEU	Cold-induced sweating syndrome 1(ClinVar)	Cold Induced Sweating Syndrome	C1413713;C1832409	CISS|CISS1|CLF|CLF-1|NR6|zcytor5	2364	M0QZL6:O75462	NP_004741.1
Matrisome-associated	Secreted Factors	CRLF1	cytokine receptor-like factor 1	2364	p.TRP284CYS	Cold-induced sweating syndrome 1(ClinVar)	Cold Induced Sweating Syndrome	C1413713;C1832409	CISS|CISS1|CLF|CLF-1|NR6|zcytor5	2364	M0QZL6:O75462	NP_004741.1
Matrisome-associated	Secreted Factors	CRLF1	cytokine receptor-like factor 1	2364	p.TRP76GLY	Cold-induced sweating syndrome 1(ClinVar)	COLD-INDUCED SWEATING SYNDROME 1	C1848947	CISS|CISS1|CLF|CLF-1|NR6|zcytor5	2364	M0QZL6:O75462	NP_004741.1
Matrisome-associated	Secreted Factors	DHH	desert hedgehog homolog (Drosophila)	2865	p.LEU162PRO	46\x2cXY gonadal dysgenesis\x2c complete\x2c dhh-related(ClinVar)	46,XY gonadal dysgenesis, complete, dhh-related	C4016928	HHG-3|MGC35145	2865	O43323	NP_066382.1
Matrisome-associated	Secreted Factors	DHH	desert hedgehog homolog (Drosophila)	2865	p.MET1THR	46\x2cXY gonadal dysgenesis\x2c partial\x2c with minifascicular neuropathy(ClinVar)	46,XY GONADAL DYSGENESIS, PARTIAL, WITH MINIFASCICULAR NEUROPATHY	C2751325	HHG-3|MGC35145	2865	O43323	NP_066382.1
Matrisome-associated	Secreted Factors	EDA	ectodysplasin A	3157	p.ALA349THR	Hypohidrotic X-linked ectodermal dysplasia(ClinVar)	Ectodermal dysplasia 1, hypohidrotic, X-linked	C0162359	ED1|ED1-A1|ED1-A2|EDA1|EDA2|HED|STHAGX1|XHED|XLHED	3157	D6RA95:Q92838	NP_001005609.1:NP_001005610.2:NP_001005612.2:NP_001005613.1:NP_001390.1
Matrisome-associated	Secreted Factors	EDA	ectodysplasin A	3157	p.ARG155CYS	Hypohidrotic X-linked ectodermal dysplasia(ClinVar)	Ectodermal dysplasia	C0013575	ED1|ED1-A1|ED1-A2|EDA1|EDA2|HED|STHAGX1|XHED|XLHED	3157	D6RA95:Q92838	NP_001005609.1:NP_001005610.2:NP_001005612.2:NP_001005613.1:NP_001390.1
Matrisome-associated	Secreted Factors	EDA	ectodysplasin A	3157	p.ARG156CYS	Hypohidrotic X-linked ectodermal dysplasia(ClinVar)	Ectodermal dysplasia	C0013575	ED1|ED1-A1|ED1-A2|EDA1|EDA2|HED|STHAGX1|XHED|XLHED	3157	D6RA95:Q92838	NP_001005609.1:NP_001005610.2:NP_001005612.2:NP_001005613.1:NP_001390.1
Matrisome-associated	Secreted Factors	EDA	ectodysplasin A	3157	p.ARG69LEU	Hypohidrotic X-linked ectodermal dysplasia(ClinVar)	Ectodermal dysplasia	C0013575	ED1|ED1-A1|ED1-A2|EDA1|EDA2|HED|STHAGX1|XHED|XLHED	3157	D6RA95:Q92838	NP_001005609.1:NP_001005610.2:NP_001005612.2:NP_001005613.1:NP_001390.1
Matrisome-associated	Secreted Factors	EDA	ectodysplasin A	3157	p.GLN23TER	Hypohidrotic X-linked ectodermal dysplasia(ClinVar)	Ectodermal dysplasia	C0013575	ED1|ED1-A1|ED1-A2|EDA1|EDA2|HED|STHAGX1|XHED|XLHED	3157	D6RA95:Q92838	NP_001005609.1:NP_001005610.2:NP_001005612.2:NP_001005613.1:NP_001390.1
Matrisome-associated	Secreted Factors	EDA	ectodysplasin A	3157	p.GLU63LYS	Hypohidrotic X-linked ectodermal dysplasia(ClinVar)	Ectodermal dysplasia	C0013575	ED1|ED1-A1|ED1-A2|EDA1|EDA2|HED|STHAGX1|XHED|XLHED	3157	D6RA95:Q92838	NP_001005609.1:NP_001005610.2:NP_001005612.2:NP_001005613.1:NP_001390.1
Matrisome-associated	Secreted Factors	EDA	ectodysplasin A	3157	p.GLY224ALA	Hypohidrotic X-linked ectodermal dysplasia(ClinVar)	Ectodermal dysplasia	C0013575	ED1|ED1-A1|ED1-A2|EDA1|EDA2|HED|STHAGX1|XHED|XLHED	3157	D6RA95:Q92838	NP_001005609.1:NP_001005610.2:NP_001005612.2:NP_001005613.1:NP_001390.1
Matrisome-associated	Secreted Factors	EDA	ectodysplasin A	3157	p.PRO209LEU	Hypohidrotic X-linked ectodermal dysplasia(ClinVar)	Ectodermal dysplasia	C0013575	ED1|ED1-A1|ED1-A2|EDA1|EDA2|HED|STHAGX1|XHED|XLHED	3157	D6RA95:Q92838	NP_001005609.1:NP_001005610.2:NP_001005612.2:NP_001005613.1:NP_001390.1
Matrisome-associated	Secreted Factors	EDA	ectodysplasin A	3157	p.TYR61HIS	Hypohidrotic X-linked ectodermal dysplasia(ClinVar)	Ectodermal dysplasia	C0013575	ED1|ED1-A1|ED1-A2|EDA1|EDA2|HED|STHAGX1|XHED|XLHED	3157	D6RA95:Q92838	NP_001005609.1:NP_001005610.2:NP_001005612.2:NP_001005613.1:NP_001390.1
Matrisome-associated	Secreted Factors	EDA	ectodysplasin A	3157	p.TYR61TER	Hypohidrotic X-linked ectodermal dysplasia(ClinVar)	Ectodermal dysplasia	C0013575	ED1|ED1-A1|ED1-A2|EDA1|EDA2|HED|STHAGX1|XHED|XLHED	3157	D6RA95:Q92838	NP_001005609.1:NP_001005610.2:NP_001005612.2:NP_001005613.1:NP_001390.1
Matrisome-associated	Secreted Factors	EGF	epidermal growth factor (beta-urogastrone)	3229	p.PRO1070LEU	Hypomagnesemia 4\x2c renal(ClinVar)	Hypomagnesemia 4, renal	C2673648	HOMG4|URG	3229	P01133	NP_001171601.1:NP_001171602.1:NP_001954.2
Matrisome-associated	Secreted Factors	FGF10	fibroblast growth factor 10	3666	p.ARG193TER	Congenital absence of salivary gland(ClinVar)	Aplasia of lacrimal and salivary glands	C0158667	-	3666	D6RG33:O15520	NP_004456.1:XP_005248321.1
Matrisome-associated	Secreted Factors	FGF10	fibroblast growth factor 10	3666	p.ARG80SER	Congenital absence of salivary gland(ClinVar)	Aplasia of lacrimal and salivary glands	C0158667	-	3666	D6RG33:O15520	NP_004456.1:XP_005248321.1
Matrisome-associated	Secreted Factors	FGF10	fibroblast growth factor 10	3666	p.CYS106PHE	Ladd syndrome(ClinVar)	Lacrimo-auriculo-dento-digital syndrome	C0265269	-	3666	D6RG33:O15520	NP_004456.1:XP_005248321.1
Matrisome-associated	Secreted Factors	FGF10	fibroblast growth factor 10	3666	p.GLY138GLU	Congenital absence of salivary gland(ClinVar)	Aplasia of lacrimal and salivary glands	C0158667	-	3666	D6RG33:O15520	NP_004456.1:XP_005248321.1
Matrisome-associated	Secreted Factors	FGF10	fibroblast growth factor 10	3666	p.ILE156ARG	Ladd syndrome(ClinVar)	Lacrimo-auriculo-dento-digital syndrome	C0265269	-	3666	D6RG33:O15520	NP_004456.1:XP_005248321.1
Matrisome-associated	Secreted Factors	FGF10	fibroblast growth factor 10	3666	p.LYS137TER	Congenital absence of salivary gland|Ladd syndrome(ClinVar)	APLASIA OF LACRIMAL AND SALIVARY GLANDS	C0158667	-	3666	D6RG33:O15520	NP_004456.1:XP_005248321.1
Matrisome-associated	Secreted Factors	FGF14	fibroblast growth factor 14	3671	p.PHE145SER	Spinocerebellar ataxia 27(ClinVar)	SPINOCEREBELLAR ATAXIA 27	C1836383	FHF4|MGC119129|SCA27	3671	Q92915	NP_004106.1:NP_787125.1
Matrisome-associated	Secreted Factors	FGF23	fibroblast growth factor 23	3680	p.ARG176GLN	Autosomal dominant hypophosphatemic rickets(ClinVar)	ADHR	C0342642;C1332124;C1705508;C3539654	ADHR|HPDR2|HYPF|PHPTC	3680	Q9GZV9	NP_065689.1
Matrisome-associated	Secreted Factors	FGF23	fibroblast growth factor 23	3680	p.ARG179GLN	Autosomal dominant hypophosphatemic rickets(ClinVar)	ADHR	C0342642;C1332124;C1705508;C3539654	ADHR|HPDR2|HYPF|PHPTC	3680	Q9GZV9	NP_065689.1
Matrisome-associated	Secreted Factors	FGF23	fibroblast growth factor 23	3680	p.ARG179TRP	Autosomal dominant hypophosphatemic rickets(ClinVar)	ADHR	C0342642;C1332124;C1705508;C3539654	ADHR|HPDR2|HYPF|PHPTC	3680	Q9GZV9	NP_065689.1
Matrisome-associated	Secreted Factors	FGF23	fibroblast growth factor 23	3680	p.GLN54HIS	Autosomal dominant hypophosphatemic rickets(ClinVar)	Autosomal dominant hypophosphatemic rickets	C0342642	ADHR|HPDR2|HYPF|PHPTC	3680	Q9GZV9	NP_065689.1
Matrisome-associated	Secreted Factors	FGF23	fibroblast growth factor 23	3680	p.MET96THR	Tumoral calcinosis\x2c familial\x2c hyperphosphatemic(ClinVar)	Tumoral calcinosis, familial, hyperphosphatemic	C1876187	ADHR|HPDR2|HYPF|PHPTC	3680	Q9GZV9	NP_065689.1
Matrisome-associated	Secreted Factors	FGF23	fibroblast growth factor 23	3680	p.SER129PHE	Tumoral calcinosis\x2c familial\x2c hyperphosphatemic(ClinVar)	Tumoral calcinosis, familial, hyperphosphatemic	C1876187	ADHR|HPDR2|HYPF|PHPTC	3680	Q9GZV9	NP_065689.1
Matrisome-associated	Secreted Factors	FGF23	fibroblast growth factor 23	3680	p.SER71GLY	Tumoral calcinosis\x2c familial\x2c hyperphosphatemic(ClinVar)	HFTC	C1414953;C1876187	ADHR|HPDR2|HYPF|PHPTC	3680	Q9GZV9	NP_065689.1
Matrisome-associated	Secreted Factors	FGF3	fibroblast growth factor 3 (murine mammary tumor virus integration site (v-int-2) oncogene homolog)	3681	p.ARG104TER	Deafness with labyrinthine aplasia microtia and microdontia (LAMM)(ClinVar)	Deafness with labyrinthine aplasia microtia and microdontia (LAMM)	C1853144	HBGF-3|INT2	3681	P11487	NP_005238.1
Matrisome-associated	Secreted Factors	FGF3	fibroblast growth factor 3 (murine mammary tumor virus integration site (v-int-2) oncogene homolog)	3681	p.ARG95TRP	Deafness with labyrinthine aplasia microtia and microdontia (LAMM)(ClinVar)	Deafness with labyrinthine aplasia microtia and microdontia (LAMM)	C1853144	HBGF-3|INT2	3681	P11487	NP_005238.1
Matrisome-associated	Secreted Factors	FGF3	fibroblast growth factor 3 (murine mammary tumor virus integration site (v-int-2) oncogene homolog)	3681	p.CYS50TER	Deafness with labyrinthine aplasia microtia and microdontia (LAMM)(ClinVar)	Deafness with labyrinthine aplasia microtia and microdontia (LAMM)	C1853144	HBGF-3|INT2	3681	P11487	NP_005238.1
Matrisome-associated	Secreted Factors	FGF3	fibroblast growth factor 3 (murine mammary tumor virus integration site (v-int-2) oncogene homolog)	3681	p.GLY66CYS	Deafness with labyrinthine aplasia microtia and microdontia (LAMM)(ClinVar)	Deafness with labyrinthine aplasia microtia and microdontia (LAMM)	C1853144	HBGF-3|INT2	3681	P11487	NP_005238.1
Matrisome-associated	Secreted Factors	FGF3	fibroblast growth factor 3 (murine mammary tumor virus integration site (v-int-2) oncogene homolog)	3681	p.LEU6PRO	Deafness with labyrinthine aplasia microtia and microdontia (LAMM)(ClinVar)	Deafness with labyrinthine aplasia microtia and microdontia (LAMM)	C1853144	HBGF-3|INT2	3681	P11487	NP_005238.1
Matrisome-associated	Secreted Factors	FGF3	fibroblast growth factor 3 (murine mammary tumor virus integration site (v-int-2) oncogene homolog)	3681	p.SER156PRO	Deafness with labyrinthine aplasia microtia and microdontia (LAMM)(ClinVar)	Deafness with labyrinthine aplasia microtia and microdontia (LAMM)	C1853144	HBGF-3|INT2	3681	P11487	NP_005238.1
Matrisome-associated	Secreted Factors	FGF3	fibroblast growth factor 3 (murine mammary tumor virus integration site (v-int-2) oncogene homolog)	3681	p.TYR106CYS	Deafness with labyrinthine aplasia microtia and microdontia (LAMM)(ClinVar)	Deafness with labyrinthine aplasia microtia and microdontia (LAMM)	C1853144	HBGF-3|INT2	3681	P11487	NP_005238.1
Matrisome-associated	Secreted Factors	FGF3	fibroblast growth factor 3 (murine mammary tumor virus integration site (v-int-2) oncogene homolog)	3681	p.TYR49CYS	Deafness with labyrinthine aplasia microtia and microdontia (LAMM)(ClinVar)	Deafness with labyrinthine aplasia microtia and microdontia (LAMM)	C1853144	HBGF-3|INT2	3681	P11487	NP_005238.1
Matrisome-associated	Secreted Factors	FGF8	fibroblast growth factor 8 (androgen-induced)	3686	p.ARG116GLY	Kallmann syndrome 6(ClinVar)	HH6	C1706606;C3552574	AIGF|HBGF-8|KAL6|MGC149376	3686	P55075:R4GMQ3	NP_006110.1:NP_149353.1:NP_149354.1:NP_149355.1
Matrisome-associated	Secreted Factors	FGF8	fibroblast growth factor 8 (androgen-induced)	3686	p.HIS14ASN	Kallmann syndrome 6(ClinVar)	HH6	C1706606;C3552574	AIGF|HBGF-8|KAL6|MGC149376	3686	P55075:R4GMQ3	NP_006110.1:NP_149353.1:NP_149354.1:NP_149355.1
Matrisome-associated	Secreted Factors	FGF8	fibroblast growth factor 8 (androgen-induced)	3686	p.LYS89GLU	Kallmann syndrome 6(ClinVar)	HH6	C1706606;C3552574	AIGF|HBGF-8|KAL6|MGC149376	3686	P55075:R4GMQ3	NP_006110.1:NP_149353.1:NP_149354.1:NP_149355.1
Matrisome-associated	Secreted Factors	FGF8	fibroblast growth factor 8 (androgen-induced)	3686	p.PHE40LEU	Kallmann syndrome 6(ClinVar)	HH6	C1706606;C3552574	AIGF|HBGF-8|KAL6|MGC149376	3686	P55075:R4GMQ3	NP_006110.1:NP_149353.1:NP_149354.1:NP_149355.1
Matrisome-associated	Secreted Factors	FGF8	fibroblast growth factor 8 (androgen-induced)	3686	p.PRO26LEU	Kallmann syndrome 6(ClinVar)	HYPOGONADOTROPIC HYPOGONADISM 6 WITH ANOSMIA	C4016670	AIGF|HBGF-8|KAL6|MGC149376	3686	P55075:R4GMQ3	NP_006110.1:NP_149353.1:NP_149354.1:NP_149355.1
Matrisome-associated	Secreted Factors	FGF9	fibroblast growth factor 9 (glia-activating factor)	3687	p.SER99ASN	Multiple synostoses syndrome 3(ClinVar)	Multiple synostoses syndrome	C0175700	GAF|HBFG-9|MGC119914|MGC119915|SYNS3	3687	P31371	NP_002001.1
Matrisome-associated	Secreted Factors	FLG	filaggrin	3748	p.ARG501TER	Ichthyosis vulgaris|Dermatitis\x2c atopic\x2c 2\x2c susceptibility to(ClinVar)	DERMATITIS, ATOPIC, 2	C1853965	ATOD2	3748	P20930	NP_002007.1
Matrisome-associated	Secreted Factors	FLG	filaggrin	3748	p.SER2554TER	Ichthyosis vulgaris|Dermatitis\x2c atopic\x2c 2\x2c susceptibility to(ClinVar)	DERMATITIS, ATOPIC, 2	C1853965	ATOD2	3748	P20930	NP_002007.1
Matrisome-associated	Secreted Factors	FRZB	frizzled-related protein	3959	p.ARG200TRP	Osteoarthritis susceptibility 1(ClinVar)	Hip osteoarthritis	C0029410	FRE|FRITZ|FRP-3|FRZB-1|FRZB-PEN|FRZB1|FZRB|OS1|SFR	3959	Q92765	NP_001454.2
Matrisome-associated	Secreted Factors	FRZB	frizzled-related protein	3959	p.ARG324GLY	Osteoarthritis susceptibility 1(ClinVar)	Hip osteoarthritis	C0029410	FRE|FRITZ|FRP-3|FRZB-1|FRZB-PEN|FRZB1|FZRB|OS1|SFR	3959	Q92765	NP_001454.2
Matrisome-associated	Secreted Factors	GDF1	growth differentiation factor 1	4214	p.CYS227TER	Transposition of great arteries\x2c dextro-looped 3(ClinVar)	Congenital heart defects	C0018798;C0152021	-	4214	P27539	NP_001483.3
Matrisome-associated	Secreted Factors	GDF1	growth differentiation factor 1	4214	p.CYS267TYR	Double outlet right ventricle(ClinVar)	Congenital heart defects	C0018798;C0152021	-	4214	P27539	NP_001483.3
Matrisome-associated	Secreted Factors	GDF5	growth differentiation factor 5	4220	p.ARG301TER	Brachydactyly type C(ClinVar)	Brachydactyly type C	C1862103	BMP14|CDMP1|LAP4|OS5|SYNS2	4220	P43026	NP_000548.2
Matrisome-associated	Secreted Factors	GDF5	growth differentiation factor 5	4220	p.ARG378GLN	Fibular hypoplasia and complex brachydactyly(ClinVar)	DPS	C0009474;C1843919;C2986739	BMP14|CDMP1|LAP4|OS5|SYNS2	4220	P43026	NP_000548.2
Matrisome-associated	Secreted Factors	GDF5	growth differentiation factor 5	4220	p.ARG438LEU	Cushing's symphalangism|Multiple synostoses syndrome 2(ClinVar)	Cushing's symphalangism	C1861385	BMP14|CDMP1|LAP4|OS5|SYNS2	4220	P43026	NP_000548.2
Matrisome-associated	Secreted Factors	GDF5	growth differentiation factor 5	4220	p.CYS400TYR	Grebe syndrome(ClinVar)	AMDG	C0265260	BMP14|CDMP1|LAP4|OS5|SYNS2	4220	P43026	NP_000548.2
Matrisome-associated	Secreted Factors	GDF5	growth differentiation factor 5	4220	p.GLU491LYS	Cushing's symphalangism(ClinVar)	Cushing's symphalangism	C1861385	BMP14|CDMP1|LAP4|OS5|SYNS2	4220	P43026	NP_000548.2
Matrisome-associated	Secreted Factors	GDF5	growth differentiation factor 5	4220	p.LEU373ARG	Cushing's symphalangism(ClinVar)	Brachydactyly, type C	C1862103	BMP14|CDMP1|LAP4|OS5|SYNS2	4220	P43026	NP_000548.2
Matrisome-associated	Secreted Factors	GDF5	growth differentiation factor 5	4220	p.LEU441PRO	Fibular hypoplasia and complex brachydactyly|Brachydactyly type A2(ClinVar)	BDA2	C1706894;C1832702	BMP14|CDMP1|LAP4|OS5|SYNS2	4220	P43026	NP_000548.2
Matrisome-associated	Secreted Factors	GDF5	growth differentiation factor 5	4220	p.PRO436THR	Fibular hypoplasia and complex brachydactyly(ClinVar)	DPS	C0009474;C1843919;C2986739	BMP14|CDMP1|LAP4|OS5|SYNS2	4220	P43026	NP_000548.2
Matrisome-associated	Secreted Factors	GDF5	growth differentiation factor 5	4220	p.SER475ASN	Multiple synostoses syndrome 2(ClinVar)	Multiple synostoses syndrome 2	C1832708	BMP14|CDMP1|LAP4|OS5|SYNS2	4220	P43026	NP_000548.2
Matrisome-associated	Secreted Factors	GDF5	growth differentiation factor 5	4220	p.TYR487TER	Brachydactyly type C(ClinVar)	Brachydactyly type C	C1862103	BMP14|CDMP1|LAP4|OS5|SYNS2	4220	P43026	NP_000548.2
Matrisome-associated	Secreted Factors	GDF6	growth differentiation factor 6	4221	p.ALA249GLU	Klippel-Feil syndrome 1\x2c autosomal dominant|Microphthalmia\x2c isolated 4(ClinVar)	Klippel-Feil syndrome	C0022738	BMP13|CDMP2|KFS|KFSL|MCOP4|MGC158100|MGC158101|SCD	4221	Q6KF10	NP_001001557.1
Matrisome-associated	Secreted Factors	GDF6	growth differentiation factor 6	4221	p.GLN253LEU	Microphthalmia\x2c isolated 4(ClinVar)	MCOP4	C2751307	BMP13|CDMP2|KFS|KFSL|MCOP4|MGC158100|MGC158101|SCD	4221	Q6KF10	NP_001001557.1
Matrisome-associated	Secreted Factors	GDF6	growth differentiation factor 6	4221	p.GLY42VAL	Klippel-Feil syndrome 1\x2c autosomal dominant(ClinVar)	KLIPPEL-FEIL SYNDROME 1, AUTOSOMAL DOMINANT	C1861689	BMP13|CDMP2|KFS|KFSL|MCOP4|MGC158100|MGC158101|SCD	4221	Q6KF10	NP_001001557.1
Matrisome-associated	Secreted Factors	GDF6	growth differentiation factor 6	4221	p.LEU289PRO	Klippel-Feil syndrome 1\x2c autosomal dominant(ClinVar)	Klippel-Feil syndrome	C0022738	BMP13|CDMP2|KFS|KFSL|MCOP4|MGC158100|MGC158101|SCD	4221	Q6KF10	NP_001001557.1
Matrisome-associated	Secreted Factors	GDF6	growth differentiation factor 6	4221	p.LYS424ARG	Klippel-Feil syndrome 1\x2c autosomal dominant(ClinVar)	Klippel-Feil syndrome 1, autosomal dominant	C1861689	BMP13|CDMP2|KFS|KFSL|MCOP4|MGC158100|MGC158101|SCD	4221	Q6KF10	NP_001001557.1
Matrisome-associated	Secreted Factors	GDF6	growth differentiation factor 6	4221	p.PRO327HIS	Microphthalmia\x2c isolated 4(ClinVar)	MCOP4	C2751307	BMP13|CDMP2|KFS|KFSL|MCOP4|MGC158100|MGC158101|SCD	4221	Q6KF10	NP_001001557.1
Matrisome-associated	Secreted Factors	GDNF	glial cell derived neurotrophic factor	4232	p.ARG93TRP	Hirschsprung disease 3|Congenital central hypoventilation|Pheochromocytoma\x2c modifier of(ClinVar)	CENTRAL HYPOVENTILATION SYNDROME, CONGENITAL	C1275808	ATF1|ATF2|HFB1-GDNF	4232	P39905	NP_000505.1:NP_001177397.1:NP_001177398.1:NP_001265027.1:NP_954701.1
Matrisome-associated	Secreted Factors	GDNF	glial cell derived neurotrophic factor	4232	p.ASP150ASN	Hirschsprung disease 3(ClinVar)	Hirschsprung disease	C0019569;C3888239	ATF1|ATF2|HFB1-GDNF	4232	P39905	NP_000505.1:NP_001177397.1:NP_001177398.1:NP_001265027.1:NP_954701.1
Matrisome-associated	Secreted Factors	GDNF	glial cell derived neurotrophic factor	4232	p.ILE211MET	Hirschsprung disease 3(ClinVar)	Hirschsprung disease	C0019569;C3888239	ATF1|ATF2|HFB1-GDNF	4232	P39905	NP_000505.1:NP_001177397.1:NP_001177398.1:NP_001265027.1:NP_954701.1
Matrisome-associated	Secreted Factors	GDNF	glial cell derived neurotrophic factor	4232	p.THR154SER	Hirschsprung disease 3(ClinVar)	Hirschsprung disease	C0019569;C3888239	ATF1|ATF2|HFB1-GDNF	4232	P39905	NP_000505.1:NP_001177397.1:NP_001177398.1:NP_001265027.1:NP_954701.1
Matrisome-associated	Secreted Factors	GH1	growth hormone 1	4261	p.ARG209HIS	Autosomal dominant isolated somatotropin deficiency(ClinVar)	Autosomal dominant isolated somatotropin deficiency	C0271567	GH|GH-N|GHN|IGHD1B|hGH-N	4261	B1A4G9:P01241	NP_000506.2:NP_072053.1:NP_072054.1:XP_005257275.1:XP_005257276.1:NP_072055.1
Matrisome-associated	Secreted Factors	GH1	growth hormone 1	4261	p.CYS79PHE	Kowarski syndrome(ClinVar)	Kowarski syndrome	C1849779	GH|GH-N|GHN|IGHD1B|hGH-N	4261	B1A4G9:P01241	NP_000506.2:NP_072053.1:NP_072054.1:XP_005257275.1:XP_005257276.1:NP_072055.1
Matrisome-associated	Secreted Factors	GH1	growth hormone 1	4261	p.TRP20TER	Ateleiotic dwarfism(ClinVar)	Ateleiotic dwarfism	C0342573	GH|GH-N|GHN|IGHD1B|hGH-N	4261	B1A4G9:P01241	NP_000506.2:NP_072053.1:NP_072054.1:XP_005257275.1:XP_005257276.1:NP_072055.1
Matrisome-associated	Secreted Factors	HGF	hepatocyte growth factor (hepapoietin A	NA	p.SER165SER	Deafness\x2c autosomal recessive 39(ClinVar)	DEAFNESS, AUTOSOMAL RECESSIVE 39	C1842342	NA	NA	NA	NA
Matrisome-associated	Secreted Factors	IGF1	insulin-like growth factor 1 (somatomedin C)	5464	p.VAL92MET	Insulin-like growth factor I deficiency(ClinVar)	Growth retardation	C0151686	IGF1A|IGFI	5464	P05019:Q13429	NP_000609.1:NP_001104754.1:NP_001104755.1:NP_001104753.1
Matrisome-associated	Secreted Factors	IL13	interleukin 13	5973	p.GLN144ARG	Asthma\x2c susceptibility to|Allergic rhinitis\x2c susceptibility to(ClinVar)	Asthma, susceptibility to	C1869116	ALRH|BHR1|IL-13|MGC116786|MGC116788|MGC116789|P600	5973	P35225	NP_002179.2
Matrisome-associated	Secreted Factors	IL1RN	interleukin 1 receptor antagonist	6000	p.GLN57TER	Osteomyelitis\x2c sterile multifocal\x2c with periostitis and pustulosis(ClinVar)	Interleukin 1 receptor antagonist deficiency	C2748507	DIRA|ICIL-1RA|IL-1ra3|IL1F3|IL1RA|IRAP|MGC10430|MV	6000	P18510	NP_000568.1:NP_776213.1:NP_776214.1:NP_776215.1:XP_005263718.1:XP_006712560.1
Matrisome-associated	Secreted Factors	IL1RN	interleukin 1 receptor antagonist	6000	p.GLU80TER	Osteomyelitis\x2c sterile multifocal\x2c with periostitis and pustulosis(ClinVar)	Interleukin 1 receptor antagonist deficiency	C2748507	DIRA|ICIL-1RA|IL-1ra3|IL1F3|IL1RA|IRAP|MGC10430|MV	6000	P18510	NP_000568.1:NP_776213.1:NP_776214.1:NP_776215.1:XP_005263718.1:XP_006712560.1
Matrisome-associated	Secreted Factors	INS	insulin	6081	p.ARG46GLN	Maturity-onset diabetes of the young\x2c type 10(ClinVar)	MODY10	C3150617	ILPR|IRDN	6081	A6XGL2:C9JNR5:P01308	NP_000198.1:NP_001172026.1:NP_001172027.1:NP_001278826.1
Matrisome-associated	Secreted Factors	INS	insulin	6081	p.ARG55CYS	Diabetes mellitus\x2c insulin-dependent\x2c 2(ClinVar)	IDDM2	C1852092	ILPR|IRDN	6081	A6XGL2:C9JNR5:P01308	NP_000198.1:NP_001172026.1:NP_001172027.1:NP_001278826.1
Matrisome-associated	Secreted Factors	INS	insulin	6081	p.ARG6CYS	Maturity-onset diabetes of the young\x2c type 10(ClinVar)	MODY10	C3150617	ILPR|IRDN	6081	A6XGL2:C9JNR5:P01308	NP_000198.1:NP_001172026.1:NP_001172027.1:NP_001278826.1
Matrisome-associated	Secreted Factors	INS	insulin	6081	p.ARG89CYS	Permanent neonatal diabetes mellitus(ClinVar)	Diabetes mellitus permanent neonatal	C1833104	ILPR|IRDN	6081	A6XGL2:C9JNR5:P01308	NP_000198.1:NP_001172026.1:NP_001172027.1:NP_001278826.1
Matrisome-associated	Secreted Factors	INS	insulin	6081	p.ARG89LEU	Hyperproinsulinemia\x2c familial|Proinsulin kyoto,Hyperproinsulinemia\x2c familial,Hyperproinsulinemia\x2c familial(ClinVar)	Hyperproinsulinaemia	C0342283	ILPR|IRDN	6081	A6XGL2:C9JNR5:P01308	NP_000198.1:NP_001172026.1:NP_001172027.1:NP_001278826.1
Matrisome-associated	Secreted Factors	INS	insulin	6081	p.CYS43GLY	Permanent neonatal diabetes mellitus|Neonatal diabetes mellitus(ClinVar)	Diabetes mellitus permanent neonatal	C1833104	ILPR|IRDN	6081	A6XGL2:C9JNR5:P01308	NP_000198.1:NP_001172026.1:NP_001172027.1:NP_001278826.1
Matrisome-associated	Secreted Factors	INS	insulin	6081	p.CYS96SER	.,Permanent neonatal diabetes mellitus(ClinVar)	Diabetes mellitus permanent neonatal	C1833104	ILPR|IRDN	6081	A6XGL2:C9JNR5:P01308	NP_000198.1:NP_001172026.1:NP_001172027.1:NP_001278826.1
Matrisome-associated	Secreted Factors	INS	insulin	6081	p.GLY32ARG	Permanent neonatal diabetes mellitus,Permanent neonatal diabetes mellitus|Neonatal diabetes mellitus(ClinVar)	Diabetes mellitus permanent neonatal	C1833104	ILPR|IRDN	6081	A6XGL2:C9JNR5:P01308	NP_000198.1:NP_001172026.1:NP_001172027.1:NP_001278826.1
Matrisome-associated	Secreted Factors	INS	insulin	6081	p.GLY47VAL	Permanent neonatal diabetes mellitus(ClinVar)	Diabetes mellitus permanent neonatal	C1833104	ILPR|IRDN	6081	A6XGL2:C9JNR5:P01308	NP_000198.1:NP_001172026.1:NP_001172027.1:NP_001278826.1
Matrisome-associated	Secreted Factors	INS	insulin	6081	p.GLY90CYS	Permanent neonatal diabetes mellitus(ClinVar)	Diabetes mellitus permanent neonatal	C1833104	ILPR|IRDN	6081	A6XGL2:C9JNR5:P01308	NP_000198.1:NP_001172026.1:NP_001172027.1:NP_001278826.1
Matrisome-associated	Secreted Factors	INS	insulin	6081	p.HIS34ASP	Hyperproinsulinemia\x2c familial|Proinsulin providence(ClinVar)	Hyperproinsulinaemia	C0342283	ILPR|IRDN	6081	A6XGL2:C9JNR5:P01308	NP_000198.1:NP_001172026.1:NP_001172027.1:NP_001278826.1
Matrisome-associated	Secreted Factors	INS	insulin	6081	p.PHE48CYS	Permanent neonatal diabetes mellitus,Insulin los angeles(ClinVar)	Diabetes mellitus permanent neonatal	C1833104	ILPR|IRDN	6081	A6XGL2:C9JNR5:P01308	NP_000198.1:NP_001172026.1:NP_001172027.1:NP_001278826.1
Matrisome-associated	Secreted Factors	INS	insulin	6081	p.TYR108CYS	Permanent neonatal diabetes mellitus(ClinVar)	Diabetes mellitus permanent neonatal	C1833104	ILPR|IRDN	6081	A6XGL2:C9JNR5:P01308	NP_000198.1:NP_001172026.1:NP_001172027.1:NP_001278826.1
Matrisome-associated	Secreted Factors	INS	insulin	6081	p.VAL92LEU	Insulin wakayama|Diabetes mellitus with hyperinsulinemia(ClinVar)	Hyperproinsulinaemia	C0342283	ILPR|IRDN	6081	A6XGL2:C9JNR5:P01308	NP_000198.1:NP_001172026.1:NP_001172027.1:NP_001278826.1
Matrisome-associated	Secreted Factors	INSL3	insulin-like 3 (Leydig cell)	6086	p.ARG102CYS	Cryptorchidism\x2c unilateral or bilateral(ClinVar)	CRYPTORCHIDISM	C0010417	MGC119818|MGC119819|RLF|RLNL	6086	M0QXQ3:P51460	NP_001252516.1:NP_005534.2
Matrisome-associated	Secreted Factors	INSL3	insulin-like 3 (Leydig cell)	6086	p.ARG102HIS	Cryptorchidism\x2c unilateral or bilateral(ClinVar)	CRYPTORCHIDISM	C0010417	MGC119818|MGC119819|RLF|RLNL	6086	M0QXQ3:P51460	NP_001252516.1:NP_005534.2
Matrisome-associated	Secreted Factors	INSL3	insulin-like 3 (Leydig cell)	6086	p.ASN110LYS	Cryptorchidism\x2c unilateral or bilateral(ClinVar)	Cryptorchidism	C0010417	MGC119818|MGC119819|RLF|RLNL	6086	M0QXQ3:P51460	NP_001252516.1:NP_005534.2
Matrisome-associated	Secreted Factors	INSL3	insulin-like 3 (Leydig cell)	6086	p.PRO93LEU	Cryptorchidism\x2c unilateral or bilateral(ClinVar)	Cryptorchidism	C0010417	MGC119818|MGC119819|RLF|RLNL	6086	M0QXQ3:P51460	NP_001252516.1:NP_005534.2
Matrisome-associated	Secreted Factors	KITLG	KIT ligand	6343	p.ASN36SER	Hyperpigmentation\x2c familial progressive\x2c 2(ClinVar)	FPH	C2681535	DKFZp686F2250|FPH2|KL-1|Kitl|MGF|SCF|SF|SHEP7	6343	P21583:S4R384:S4R442	NP_000890.1:NP_003985.2
Matrisome-associated	Secreted Factors	LEFTY2	left-right determination factor 2	3122	p.ARG314TER	Left-right axis malformations(ClinVar)	Left-right axis malformation	C1866091	EBAF|LEFTA|LEFTYA|MGC46222|TGFB4	3122	O00292	NP_001165896.1:NP_003231.2
Matrisome-associated	Secreted Factors	LEP	leptin	6553	p.ARG105TRP	Obesity\x2c severe\x2c due to leptin deficiency(ClinVar)	LEPTIN DEFICIENCY	C3554224	FLJ94114|OB|OBS	6553	P41159	NP_000221.1:XP_005250397.1
Matrisome-associated	Secreted Factors	NGF	nerve growth factor (beta polypeptide)	7808	p.ARG221TRP	Congenital sensory neuropathy with selective loss of small myelinated fibers(ClinVar)	Congenital sensory neuropathy with selective loss of small myelinated fibers	C0020075	Beta-NGF|HSAN5|MGC161426|MGC161428|NGFB	7808	P01138	NP_002497.2:XP_006710726.1:XP_006710727.1:XP_006710728.1
Matrisome-associated	Secreted Factors	NODAL	nodal homolog (mouse)	7865	p.ARG183GLN	Situs inversus(ClinVar)	HETEROTAXY, VISCERAL, 5, AUTOSOMAL	C3495537	MGC138230	7865	H7C0E4:Q96S42	NP_060525.3
Matrisome-associated	Secreted Factors	NODAL	nodal homolog (mouse)	7865	p.GLY260ARG	Situs inversus(ClinVar)	HETEROTAXY, VISCERAL, 5, AUTOSOMAL	C3495537	MGC138230	7865	H7C0E4:Q96S42	NP_060525.3
Matrisome-associated	Secreted Factors	NTF4	neurotrophin 4	8024	p.ALA88VAL	Glaucoma 1\x2c open angle\x2c O(ClinVar)	GLAUCOMA 1, OPEN ANGLE, O	C2751294	GLC10|GLC1O|NT-4/5|NT4|NT5|NTF5	8024	E7EP46:M0QZQ0:M0R0X2:P34130	NP_006170.1:XP_005259019.1:XP_006723295.1
Matrisome-associated	Secreted Factors	NTF4	neurotrophin 4	8024	p.ARG206GLN	Glaucoma 1\x2c open angle\x2c O(ClinVar)	GLAUCOMA 1, OPEN ANGLE, O	C2751294	GLC10|GLC1O|NT-4/5|NT4|NT5|NTF5	8024	E7EP46:M0QZQ0:M0R0X2:P34130	NP_006170.1:XP_005259019.1:XP_006723295.1
Matrisome-associated	Secreted Factors	NTF4	neurotrophin 4	8024	p.ARG206TRP	Glaucoma 1\x2c open angle\x2c O(ClinVar)	GLAUCOMA 1, OPEN ANGLE, O	C2751294	GLC10|GLC1O|NT-4/5|NT4|NT5|NTF5	8024	E7EP46:M0QZQ0:M0R0X2:P34130	NP_006170.1:XP_005259019.1:XP_006723295.1
Matrisome-associated	Secreted Factors	SHH	sonic hedgehog homolog (Drosophila)	10848	p.ALA226THR	Holoprosencephaly 3(ClinVar)	Holoprosencephaly	C0079541	HHG1|HLP3|HPE3|MCOPCB5|SMMCI|TPT|TPTPS	10848	C9JC48:F8WB84:F8WEH4:Q15465	NP_000184.1
Matrisome-associated	Secreted Factors	SHH	sonic hedgehog homolog (Drosophila)	10848	p.ALA383THR	Holoprosencephaly 3(ClinVar)	Holoprosencephaly	C0079541	HHG1|HLP3|HPE3|MCOPCB5|SMMCI|TPT|TPTPS	10848	C9JC48:F8WB84:F8WEH4:Q15465	NP_000184.1
Matrisome-associated	Secreted Factors	SHH	sonic hedgehog homolog (Drosophila)	10848	p.ASN115LYS	Holoprosencephaly 3(ClinVar)	Holoprosencephaly	C0079541	HHG1|HLP3|HPE3|MCOPCB5|SMMCI|TPT|TPTPS	10848	C9JC48:F8WB84:F8WEH4:Q15465	NP_000184.1
Matrisome-associated	Secreted Factors	SHH	sonic hedgehog homolog (Drosophila)	10848	p.ASP88VAL	Holoprosencephaly 3(ClinVar)	Holoprosencephaly	C0079541	HHG1|HLP3|HPE3|MCOPCB5|SMMCI|TPT|TPTPS	10848	C9JC48:F8WB84:F8WEH4:Q15465	NP_000184.1
Matrisome-associated	Secreted Factors	SHH	sonic hedgehog homolog (Drosophila)	10848	p.GLN100TER	Holoprosencephaly 3(ClinVar)	Holoprosencephaly	C0079541	HHG1|HLP3|HPE3|MCOPCB5|SMMCI|TPT|TPTPS	10848	C9JC48:F8WB84:F8WEH4:Q15465	NP_000184.1
Matrisome-associated	Secreted Factors	SHH	sonic hedgehog homolog (Drosophila)	10848	p.GLU256TER	Holoprosencephaly 3(ClinVar)	Holoprosencephaly	C0079541	HHG1|HLP3|HPE3|MCOPCB5|SMMCI|TPT|TPTPS	10848	C9JC48:F8WB84:F8WEH4:Q15465	NP_000184.1
Matrisome-associated	Secreted Factors	SHH	sonic hedgehog homolog (Drosophila)	10848	p.GLU284TER	Holoprosencephaly 3(ClinVar)	Holoprosencephaly	C0079541	HHG1|HLP3|HPE3|MCOPCB5|SMMCI|TPT|TPTPS	10848	C9JC48:F8WB84:F8WEH4:Q15465	NP_000184.1
Matrisome-associated	Secreted Factors	SHH	sonic hedgehog homolog (Drosophila)	10848	p.GLY290ASP	Holoprosencephaly 3|Schizencephaly(ClinVar)	Holoprosencephaly	C0079541	HHG1|HLP3|HPE3|MCOPCB5|SMMCI|TPT|TPTPS	10848	C9JC48:F8WB84:F8WEH4:Q15465	NP_000184.1
Matrisome-associated	Secreted Factors	SHH	sonic hedgehog homolog (Drosophila)	10848	p.GLY31ARG	Holoprosencephaly 3(ClinVar)	Holoprosencephaly	C0079541	HHG1|HLP3|HPE3|MCOPCB5|SMMCI|TPT|TPTPS	10848	C9JC48:F8WB84:F8WEH4:Q15465	NP_000184.1
Matrisome-associated	Secreted Factors	SHH	sonic hedgehog homolog (Drosophila)	10848	p.ILE111PHE	Single upper central incisor(ClinVar)	Single upper central incisor	C1840235	HHG1|HLP3|HPE3|MCOPCB5|SMMCI|TPT|TPTPS	10848	C9JC48:F8WB84:F8WEH4:Q15465	NP_000184.1
Matrisome-associated	Secreted Factors	SHH	sonic hedgehog homolog (Drosophila)	10848	p.LYS105TER	Holoprosencephaly 3(ClinVar)	Holoprosencephaly	C0079541	HHG1|HLP3|HPE3|MCOPCB5|SMMCI|TPT|TPTPS	10848	C9JC48:F8WB84:F8WEH4:Q15465	NP_000184.1
Matrisome-associated	Secreted Factors	SHH	sonic hedgehog homolog (Drosophila)	10848	p.PRO424ALA	Holoprosencephaly 3(ClinVar)	Holoprosencephaly	C0079541	HHG1|HLP3|HPE3|MCOPCB5|SMMCI|TPT|TPTPS	10848	C9JC48:F8WB84:F8WEH4:Q15465	NP_000184.1
Matrisome-associated	Secreted Factors	SHH	sonic hedgehog homolog (Drosophila)	10848	p.TRP117GLY	Holoprosencephaly 3,Holoprosencephaly 3(ClinVar)	Holoprosencephaly	C0079541	HHG1|HLP3|HPE3|MCOPCB5|SMMCI|TPT|TPTPS	10848	C9JC48:F8WB84:F8WEH4:Q15465	NP_000184.1
Matrisome-associated	Secreted Factors	SHH	sonic hedgehog homolog (Drosophila)	10848	p.TRP128TER	Holoprosencephaly 3|Single upper central incisor(ClinVar)	Holoprosencephaly	C0079541	HHG1|HLP3|HPE3|MCOPCB5|SMMCI|TPT|TPTPS	10848	C9JC48:F8WB84:F8WEH4:Q15465	NP_000184.1
Matrisome-associated	Secreted Factors	SHH	sonic hedgehog homolog (Drosophila)	10848	p.VAL224GLU	Holoprosencephaly 3(ClinVar)	Holoprosencephaly	C0079541	HHG1|HLP3|HPE3|MCOPCB5|SMMCI|TPT|TPTPS	10848	C9JC48:F8WB84:F8WEH4:Q15465	NP_000184.1
Matrisome-associated	Secreted Factors	SHH	sonic hedgehog homolog (Drosophila)	10848	p.VAL332ALA	Single upper central incisor(ClinVar)	Holoprosencephaly	C0079541	HHG1|HLP3|HPE3|MCOPCB5|SMMCI|TPT|TPTPS	10848	C9JC48:F8WB84:F8WEH4:Q15465	NP_000184.1
Matrisome-associated	Secreted Factors	TGFB1	transforming growth factor, beta 1	11766	p.ARG156CYS	Diaphyseal dysplasia(ClinVar)	Camurati-Engelmann disease	C0011989;C1366557	CED|DPD1|LAP|TGFB|TGFbeta	11766	M0R2S0:P01137	NP_000651.3
Matrisome-associated	Secreted Factors	TGFB1	transforming growth factor, beta 1	11766	p.ARG218CYS	Diaphyseal dysplasia(ClinVar)	Camurati-Engelmann disease	C0011989;C1366557	CED|DPD1|LAP|TGFB|TGFbeta	11766	M0R2S0:P01137	NP_000651.3
Matrisome-associated	Secreted Factors	TGFB1	transforming growth factor, beta 1	11766	p.ARG218HIS	Diaphyseal dysplasia(ClinVar)	Camurati-Engelmann disease	C0011989;C1366557	CED|DPD1|LAP|TGFB|TGFbeta	11766	M0R2S0:P01137	NP_000651.3
Matrisome-associated	Secreted Factors	TGFB1	transforming growth factor, beta 1	11766	p.CYS223GLY	Diaphyseal dysplasia,Diaphyseal dysplasia,Diaphyseal dysplasia(ClinVar)	Camurati-Engelmann disease	C0011989;C1366557	CED|DPD1|LAP|TGFB|TGFbeta	11766	M0R2S0:P01137	NP_000651.3
Matrisome-associated	Secreted Factors	TGFB1	transforming growth factor, beta 1	11766	p.CYS225ARG	Diaphyseal dysplasia(ClinVar)	Camurati-Engelmann disease	C0011989;C1366557	CED|DPD1|LAP|TGFB|TGFbeta	11766	M0R2S0:P01137	NP_000651.3
Matrisome-associated	Secreted Factors	TGFB1	transforming growth factor, beta 1	11766	p.PRO10LEU	Cystic fibrosis|Breast cancer\x2c invasive\x2c susceptibility to|Diaphyseal dysplasia(ClinVar)	Cystic fibrosis	C0010674	CED|DPD1|LAP|TGFB|TGFbeta	11766	M0R2S0:P01137	NP_000651.3
Matrisome-associated	Secreted Factors	TGFB1	transforming growth factor, beta 1	11766	p.TYR81HIS	Diaphyseal dysplasia(ClinVar)	Camurati-Engelmann disease	C0011989;C1366557	CED|DPD1|LAP|TGFB|TGFbeta	11766	M0R2S0:P01137	NP_000651.3
Matrisome-associated	Secreted Factors	TNFSF11	tumor necrosis factor (ligand) superfamily, member 11	11926	p.MET199LYS	Osteopetrosis autosomal recessive 2(ClinVar)	Osteopetrosis autosomal recessive 2	C1850126	CD254|ODF|OPGL|OPTB2|RANKL|TRANCE|hRANKL2|sOdf	11926	O14788	NP_003692.1:NP_143026.1
Matrisome-associated	Secreted Factors	TPO	thyroid peroxidase	12015	p.ARG540TER	Deficiency of iodide peroxidase(ClinVar)	Deficiency of iodide peroxidase	C1291299	MSA|TDH2A|TPX	12015	C9J511:C9JFW0:E9PFM6:H0Y6H4:H7BZH8:H7C1F5:H7C5B6:P07202	NP_000538.3:NP_001193673.1:NP_001193674.1:NP_783650.1:NP_783652.1:NP_783653.1
Matrisome-associated	Secreted Factors	TPO	thyroid peroxidase	12015	p.ARG648GLN	Deficiency of iodide peroxidase(ClinVar)	Deficiency of iodide peroxidase	C1291299	MSA|TDH2A|TPX	12015	C9J511:C9JFW0:E9PFM6:H0Y6H4:H7BZH8:H7C1F5:H7C5B6:P07202	NP_000538.3:NP_001193673.1:NP_001193674.1:NP_783650.1:NP_783652.1:NP_783653.1
Matrisome-associated	Secreted Factors	TPO	thyroid peroxidase	12015	p.ARG693TRP	Deficiency of iodide peroxidase(ClinVar)	Deficiency of iodide peroxidase	C1291299	MSA|TDH2A|TPX	12015	C9J511:C9JFW0:E9PFM6:H0Y6H4:H7BZH8:H7C1F5:H7C5B6:P07202	NP_000538.3:NP_001193673.1:NP_001193674.1:NP_783650.1:NP_783652.1:NP_783653.1
Matrisome-associated	Secreted Factors	TPO	thyroid peroxidase	12015	p.GLN660GLU	Deficiency of iodide peroxidase(ClinVar)	Deficiency of iodide peroxidase	C1291299	MSA|TDH2A|TPX	12015	C9J511:C9JFW0:E9PFM6:H0Y6H4:H7BZH8:H7C1F5:H7C5B6:P07202	NP_000538.3:NP_001193673.1:NP_001193674.1:NP_783650.1:NP_783652.1:NP_783653.1
Matrisome-associated	Secreted Factors	TPO	thyroid peroxidase	12015	p.GLU799LYS	Deficiency of iodide peroxidase(ClinVar)	Deficiency of iodide peroxidase	C1291299	MSA|TDH2A|TPX	12015	C9J511:C9JFW0:E9PFM6:H0Y6H4:H7BZH8:H7C1F5:H7C5B6:P07202	NP_000538.3:NP_001193673.1:NP_001193674.1:NP_783650.1:NP_783652.1:NP_783653.1
Matrisome-associated	Secreted Factors	TPO	thyroid peroxidase	12015	p.GLY590SER	Deficiency of iodide peroxidase(ClinVar)	Deficiency of iodide peroxidase	C1291299	MSA|TDH2A|TPX	12015	C9J511:C9JFW0:E9PFM6:H0Y6H4:H7BZH8:H7C1F5:H7C5B6:P07202	NP_000538.3:NP_001193673.1:NP_001193674.1:NP_783650.1:NP_783652.1:NP_783653.1
Matrisome-associated	Secreted Factors	TPO	thyroid peroxidase	12015	p.ILE447PHE	Deficiency of iodide peroxidase(ClinVar)	Deficiency of iodide peroxidase	C1291299	MSA|TDH2A|TPX	12015	C9J511:C9JFW0:E9PFM6:H0Y6H4:H7BZH8:H7C1F5:H7C5B6:P07202	NP_000538.3:NP_001193673.1:NP_001193674.1:NP_783650.1:NP_783652.1:NP_783653.1
Matrisome-associated	Secreted Factors	TPO	thyroid peroxidase	12015	p.TYR453ASP	Deficiency of iodide peroxidase(ClinVar)	Deficiency of iodide peroxidase	C1291299	MSA|TDH2A|TPX	12015	C9J511:C9JFW0:E9PFM6:H0Y6H4:H7BZH8:H7C1F5:H7C5B6:P07202	NP_000538.3:NP_001193673.1:NP_001193674.1:NP_783650.1:NP_783652.1:NP_783653.1
Matrisome-associated	Secreted Factors	WNT10A	wingless-type MMTV integration site family, member 10A	13829	p.ARG128GLN	Odontoonychodermal dysplasia|Tooth agenesis\x2c selective\x2c 4(ClinVar)	Ectodermal dysplasia	C0013575	FLJ14301|SSPS	13829	H7BZB8:Q9GZT5	NP_079492.2
Matrisome-associated	Secreted Factors	WNT10A	wingless-type MMTV integration site family, member 10A	13829	p.CYS107TER	Odontoonychodermal dysplasia|Schopf-Schulz-Passarge syndrome|Tooth agenesis\x2c selective\x2c 4(ClinVar)	Ectodermal dysplasia	C0013575	FLJ14301|SSPS	13829	H7BZB8:Q9GZT5	NP_079492.2
Matrisome-associated	Secreted Factors	WNT10A	wingless-type MMTV integration site family, member 10A	13829	p.CYS376TER	Odontoonychodermal dysplasia(ClinVar)	Ectodermal dysplasia	C0013575	FLJ14301|SSPS	13829	H7BZB8:Q9GZT5	NP_079492.2
Matrisome-associated	Secreted Factors	WNT10A	wingless-type MMTV integration site family, member 10A	13829	p.GLU233TER	Odontoonychodermal dysplasia(ClinVar)	ODONTOONYCHODERMAL DYSPLASIA	C0796093	FLJ14301|SSPS	13829	H7BZB8:Q9GZT5	NP_079492.2
Matrisome-associated	Secreted Factors	WNT10A	wingless-type MMTV integration site family, member 10A	13829	p.PHE228ILE	Odontoonychodermal dysplasia|Tooth agenesis\x2c selective\x2c 4(ClinVar)	Ectodermal dysplasia	C0013575	FLJ14301|SSPS	13829	H7BZB8:Q9GZT5	NP_079492.2
Matrisome-associated	Secreted Factors	WNT10A	wingless-type MMTV integration site family, member 10A	13829	p.TRP9TER	Odontoonychodermal dysplasia(ClinVar)	Ectodermal dysplasia	C0013575	FLJ14301|SSPS	13829	H7BZB8:Q9GZT5	NP_079492.2
Matrisome-associated	Secreted Factors	WNT10B	wingless-type MMTV integration site family, member 10B	12775	p.ARG332TRP	Split-hand/foot malformation 6(ClinVar)	Split hand/foot malformation	C2699510	SHFM6|WNT-12	12775	B5MCC8:C9J3H3:C9JCI2:O00744:Q4VAJ4	NP_003385.2
Matrisome-associated	Secreted Factors	WNT3	wingless-type MMTV integration site family, member 3	12782	p.GLN83TER	Tetraamelia\x2c autosomal recessive(ClinVar)	Tetra-amelia	C2931216	INT4|MGC131950|MGC138321|MGC138323	12782	P56703	NP_110380.1
Matrisome-associated	Secreted Factors	WNT4	wingless-type MMTV integration site family, member 4	12783	p.ALA114VAL	Serkal syndrome(ClinVar)	Female sex reversal with dysgenesis of kidneys, adrenals, and lungs	C2678492	SERKAL|WNT-4	12783	B1AJZ6:H0Y663:P56705	NP_110388.2:XP_005245954.1
Matrisome-associated	Secreted Factors	WNT4	wingless-type MMTV integration site family, member 4	12783	p.ARG83TRP	Mullerian aplasia and hyperandrogenism(ClinVar)	Mullerian aplasia and hyperandrogenism	C2675014	SERKAL|WNT-4	12783	B1AJZ6:H0Y663:P56705	NP_110388.2:XP_005245954.1
Matrisome-associated	Secreted Factors	WNT4	wingless-type MMTV integration site family, member 4	12783	p.GLU216GLY	Mullerian aplasia and hyperandrogenism(ClinVar)	Mullerian aplasia and hyperandrogenism	C2675014	SERKAL|WNT-4	12783	B1AJZ6:H0Y663:P56705	NP_110388.2:XP_005245954.1
Matrisome-associated	Secreted Factors	WNT4	wingless-type MMTV integration site family, member 4	12783	p.LEU12PRO	Mullerian aplasia and hyperandrogenism(ClinVar)	MULLERIAN APLASIA AND HYPERANDROGENISM	C2675014	SERKAL|WNT-4	12783	B1AJZ6:H0Y663:P56705	NP_110388.2:XP_005245954.1
Matrisome-associated	Secreted Factors	WNT7A	wingless-type MMTV integration site family, member 7A	12786	p.ARG292CYS	Ulna and fibula absence of with severe limb deficiency(ClinVar)	Fuhrmann syndrome	C1856728	-	12786	O00755	NP_004616.2
