# Supplementary material for: The Human Extracellular Matrix Diseasome Reveals Genotype–Phenotype Associations with Clinical Implications for Age-Related Diseases
Source: Biomedicines. 2023 Apr 19;11(4):1212. doi: 10.3390/biomedicines11041212 (PMC10135578; doi:10.3390/biomedicines11041212)
Supplement: Supplementary file 1 [file biomedicines-11-01212-s001.zip › Table_S7_UKBiobankTop1000_data.csv]

division	category	Gene Symbol	Gene Name	geneid	Top variant in loci	Phenotype	MAF	P-value	Gene	Species	Synonyms	HGNC_IDs Links	UniProt_IDs	Refseq_IDs
Core matrisome	Collagens	COL11A2	collagen, type XI, alpha 2	2187	6:33,144,466 C / A (rs41317098)	Diagnoses - main ICD10: K90 Intestinal malabsorption	0.051	3.3e-83	COL11A2	Homo sapiens	DFNA13|DFNB53|HKE5|PARP|STL3	2187	A2AAS7:H0Y3B3:H0Y3B5:H0Y3M9:H0YHM5:H0YHM9:H0YIS1:P13942:Q4VXY6	NP_001157243.1:NP_542411.2:NP_542412.2:NP_542410.2:NP_542412.2
Core matrisome	Collagens	COL13A1	collagen, type XIII, alpha 1	2190	10:71,656,912 T / G (rs542880628)	Underlying (primary) cause of death: ICD10: C73 Malignant neoplasm of thyroid gland	0.0022	5.4e-59	COL13A1	Homo sapiens	COLXIIIA1|FLJ42485	2190	E7ES46:E7ES47:E7ES49:E7ES50:E7ES51:E7ES55:E7ES56:E7EX21:E9PEG9:G5E987:H7BYT9:H7BZB6:Q5TAT6	NP_001123575.1:NP_542988.3:NP_542990.3:NP_542991.3:NP_542992.3:NP_542995.3
Core matrisome	Collagens	COL15A1	collagen, type XV, alpha 1	2192	9:101,803,934 A / G (rs138724527)	Underlying (primary) cause of death: ICD10: I50.9 Heart failure, unspecified	0.002	1.6e-60	COL15A1	Homo sapiens	FLJ38566	2192	P39059	NP_001846.3
Core matrisome	ECM Glycoproteins	EFEMP1	EGF-containing fibulin-like extracellular matrix protein 1	3218	2:56,106,928 C / T (rs59985551)	Standing height	0.22	5.6e-139	EFEMP1	Homo sapiens	DHRD|DRAD|FBLN3|FBNL|FLJ35535|MGC111353|MLVT|MTLV|	3218	C9J4H7:C9J4J8:C9J8S9:C9JPZ9:C9JQX7:C9JUM4:Q12805:Q580Q6	NP_001034437.1:NP_001034438.1
Core matrisome	ECM Glycoproteins	EFEMP1	EGF-containing fibulin-like extracellular matrix protein 1	3218	2:56,106,928 C / T (rs59985551)	Comparative height size at age 10	0.22	1.3e-84	EFEMP1	Homo sapiens	DHRD|DRAD|FBLN3|FBNL|FLJ35535|MGC111353|MLVT|MTLV|	3218	C9J4H7:C9J4J8:C9J8S9:C9JPZ9:C9JQX7:C9JUM4:Q12805:Q580Q6	NP_001034437.1:NP_001034438.1
Core matrisome	ECM Glycoproteins	EFEMP1	EGF-containing fibulin-like extracellular matrix protein 1	3218	2:56,106,928 C / T (rs59985551)	Forced vital capacity (FVC)	0.22	1.9e-69	EFEMP1	Homo sapiens	DHRD|DRAD|FBLN3|FBNL|FLJ35535|MGC111353|MLVT|MTLV|	3218	C9J4H7:C9J4J8:C9J8S9:C9JPZ9:C9JQX7:C9JUM4:Q12805:Q580Q6	NP_001034437.1:NP_001034438.1
Core matrisome	ECM Glycoproteins	EFEMP1	EGF-containing fibulin-like extracellular matrix protein 1	3218	2:56,106,928 C / T (rs59985551)	Forced vital capacity (FVC), Best measure	0.22	3.9e-60	EFEMP1	Homo sapiens	DHRD|DRAD|FBLN3|FBNL|FLJ35535|MGC111353|MLVT|MTLV|	3218	C9J4H7:C9J4J8:C9J8S9:C9JPZ9:C9JQX7:C9JUM4:Q12805:Q580Q6	NP_001034437.1:NP_001034438.1
Core matrisome	ECM Glycoproteins	EYS	eyes shut homolog (Drosophila)	21555	6:65,728,569 G / T (rs190393018)	Underlying (primary) cause of death: ICD10: I73.9 Peripheral vascular disease, unspecified	8.7e-4	9.3e-98	EYS	Homo sapiens	C6orf178|C6orf179|C6orf180|EGFL10|EGFL11|KIAA0663|	21555	F8WDD3:H0Y3Q4:Q5T1H1	NP_001136272.1:NP_001136273.1:NP_938024.1
Core matrisome	ECM Glycoproteins	EYS	eyes shut homolog (Drosophila)	21555	6:67,330,231 A / G (rs539310509)	Underlying (primary) cause of death: ICD10: J98.8 Other specified respiratory disorders	0.0019	1.4e-78	EYS	Homo sapiens	C6orf178|C6orf179|C6orf180|EGFL10|EGFL11|KIAA0663|	21555	F8WDD3:H0Y3Q4:Q5T1H1	NP_001136272.1:NP_001136273.1:NP_938024.1
Core matrisome	ECM Glycoproteins	EYS	eyes shut homolog (Drosophila)	21555	6:64,646,858 C / T (rs183980052)	Underlying (primary) cause of death: ICD10: I73.9 Peripheral vascular disease, unspecified	0.0012	5.7e-76	EYS	Homo sapiens	C6orf178|C6orf179|C6orf180|EGFL10|EGFL11|KIAA0663|	21555	F8WDD3:H0Y3Q4:Q5T1H1	NP_001136272.1:NP_001136273.1:NP_938024.1
Core matrisome	ECM Glycoproteins	FBN3	fibrillin 3	18794	19:8,233,645 C / T (rs541004896)	Underlying (primary) cause of death: ICD10: X78.0 Home	0.0012	7.9e-87	FBN3	Homo sapiens	KIAA1776	18794	M0QXL8:M0R2Q5:Q75N90	NP_115823.3
Core matrisome	ECM Glycoproteins	IGFBP7	insulin-like growth factor binding protein 7	5476	4:58,780,630 C / A (rs189597825)	Underlying (primary) cause of death: ICD10: C92.1 Chronic myeloid leukaemia	0.0011	2.8e-61	IGFBP7	Homo sapiens	FSTL2|IGFBP-7|IGFBP-7v|IGFBPRP1|MAC25|PSF	5476	Q16270	NP_001240764.1:NP_001544.1
Core matrisome	ECM Glycoproteins	IGFBP7	insulin-like growth factor binding protein 7	5476	4:58,230,398 A / T (rs752899914)	Underlying (primary) cause of death: ICD10: C92.1 Chronic myeloid leukaemia	0.0012	6.3e-60	IGFBP7	Homo sapiens	FSTL2|IGFBP-7|IGFBP-7v|IGFBPRP1|MAC25|PSF	5476	Q16270	NP_001240764.1:NP_001544.1
Core matrisome	ECM Glycoproteins	MATN1	matrilin 1, cartilage matrix protein	6907	1:31,075,969 A / C (rs143518563)	Underlying (primary) cause of death: ICD10: J98.8 Other specified respiratory disorders	0.0017	5.4e-64	MATN1	Homo sapiens	CMP|CRTM	6907	P21941	NP_002370.1
Core matrisome	ECM Glycoproteins	RSPO2	R-spondin 2 homolog (Xenopus laevis)	28583	8:109,145,555 C / T (rs79206101)	Hair/balding pattern: Pattern 4	0.012	1.5e-58	RSPO2	Homo sapiens	CRISTIN2|MGC35555|MGC43342	28583	E5RGU9:E5RH25:E5RHC3:E5RJA2:E5RJU7:Q6UXX9	NP_001269792.1:NP_848660.3:XP_005250963.1
Core matrisome	ECM Glycoproteins	RSPO3	R-spondin 3 homolog (Xenopus laevis)	20866	6:127,468,274 A / C (rs7741021)	Heel bone mineral density (BMD) T-score, automated	0.48	1.8e-137	RSPO3	Homo sapiens	CRISTIN1|FLJ14440|PWTSR|THSD2	20866	Q9BXY4	NP_116173.2
Core matrisome	ECM Glycoproteins	RSPO3	R-spondin 3 homolog (Xenopus laevis)	20866	6:127,459,552 G / C (rs9482773)	Heel bone mineral density (BMD) T-score, automated (left)	0.48	9.4e-93	RSPO3	Homo sapiens	CRISTIN1|FLJ14440|PWTSR|THSD2	20866	Q9BXY4	NP_116173.2
Core matrisome	ECM Glycoproteins	RSPO3	R-spondin 3 homolog (Xenopus laevis)	20866	6:127,459,552 G / C (rs9482773)	Heel bone mineral density (BMD) T-score, automated (right)	0.48	3.3e-91	RSPO3	Homo sapiens	CRISTIN1|FLJ14440|PWTSR|THSD2	20866	Q9BXY4	NP_116173.2
Core matrisome	ECM Glycoproteins	SLIT2	slit homolog 2 (Drosophila)	11086	4:19,873,942 G / A (rs533054011)	Underlying (primary) cause of death: ICD10: C73 Malignant neoplasm of thyroid gland	0.0012	2.4e-91	SLIT2	Homo sapiens	FLJ14420|SLIL3|Slit-2	11086	E9PCX4:F5H0U4:H0Y968:H0Y9Z6:O94813:X6R3P0	NP_001276064.1:NP_001276065.1:NP_004778.1
Core matrisome	ECM Glycoproteins	SMOC2	SPARC related modular calcium binding 2	20323	6:168,941,419 C / T (rs570607430)	Underlying (primary) cause of death: ICD10: X42.0 Home	0.0012	2.1e-152	SMOC2	Homo sapiens	MST117|MSTP117|MSTP140|SMAP2|bA270C4A.1|bA37D8.1|d	20323	H0Y3J4:H0Y5I1:Q9H3U7	NP_001159884.1:NP_071421.1
Core matrisome	ECM Glycoproteins	TGFBI	transforming growth factor, beta-induced, 68kDa	11771	5:135,406,832 C / T (rs537612982)	Underlying (primary) cause of death: ICD10: I33.0 Acute and subacute infective endocarditis	0.0011	2.9e-91	TGFBI	Homo sapiens	BIGH3|CDB1|CDG2|CDGG1|CSD|CSD1|CSD2|CSD3|EBMD|LCD1	11771	D6RBX4:G8JLA8:H0Y8L3:H0Y8M8:H0Y9D7:H0YAB8:H0YAH8:Q15582:S4R3C6	NP_000349.1
Core matrisome	ECM Glycoproteins	THBS3	thrombospondin 3	11787	1:155,175,089 C / T (rs72704117)	Impedance of arm (right)	0.023	1.2e-60	THBS3	Homo sapiens	MGC119564|MGC119565|TSP3	11787	B4DQH6:F5H4Z8:P49746:Q2HIZ1	NP_001239536.1:NP_001239537.1:NP_009043.1
Core matrisome	ECM Glycoproteins	THBS3	thrombospondin 3	11787	1:155,175,089 C / T (rs72704117)	Impedance of arm (left)	0.023	2.2e-58	THBS3	Homo sapiens	MGC119564|MGC119565|TSP3	11787	B4DQH6:F5H4Z8:P49746:Q2HIZ1	NP_001239536.1:NP_001239537.1:NP_009043.1
Core matrisome	ECM Glycoproteins	TNXB	tenascin XB	11976	6:32,028,149 G / C (rs1150758)	Started insulin within one year diagnosis of diabetes	0.19	2.5e-65	TNXB	Homo sapiens	HXBL|TENX|TNX|TNXB1|TNXB2|TNXBS|XB|XBS	11976	C9J7W4:E7EPZ9:P22105	NP_061978.6:NP_115859.2
Core matrisome	ECM Glycoproteins	TNXB	tenascin XB	11976	6:32,028,149 G / C (rs1150758)	Treatment/medication code: insulin product	0.17	1.5e-60	TNXB	Homo sapiens	HXBL|TENX|TNX|TNXB1|TNXB2|TNXBS|XB|XBS	11976	C9J7W4:E7EPZ9:P22105	NP_061978.6:NP_115859.2
Core matrisome	ECM Glycoproteins	ZPLD1	zona pellucida-like domain containing 1	27022	3:101,790,499 T / C (rs536386475)	Underlying (primary) cause of death: ICD10: J98.8 Other specified respiratory disorders	0.0011	2.2e-84	ZPLD1	Homo sapiens	-	27022	Q8TCW7	NP_778226.1:XP_005247167.1
Core matrisome	Proteoglycans	ACAN	aggrecan	319	15:89,397,827 A / G (rs28584580)	Standing height	0.029	2.4e-101	ACAN	Homo sapiens	AGC1|AGCAN|CSPG1|CSPGCP|MSK16|SEDK	319	E7ENV9:E7EX88:H0YK70:H0YM81:H0YMF1:P16112:Q6PID9	NP_001126.3:NP_037359.3
Core matrisome	Proteoglycans	ACAN	aggrecan	319	15:89,397,827 A / G (rs28584580)	Comparative height size at age 10	0.029	3.5e-60	ACAN	Homo sapiens	AGC1|AGCAN|CSPG1|CSPGCP|MSK16|SEDK	319	E7ENV9:E7EX88:H0YK70:H0YM81:H0YMF1:P16112:Q6PID9	NP_001126.3:NP_037359.3
Core matrisome	Proteoglycans	SPOCK1	sparc/osteonectin, cwcv and kazal-like domains proteoglycan (testican) 1	11251	5:136,619,791 T / C (rs147882643)	Underlying (primary) cause of death: ICD10: I38 Endocarditis, valve unspecified	7.4e-4	5.5e-79	SPOCK1	Homo sapiens	FLJ37170|SPOCK|TESTICAN|TIC1	11251	D6RAM7:D6RB21:D6RFX3:Q08629	NP_004589.1
Matrisome-associated	ECM Regulators	ADAM12	ADAM metallopeptidase domain 12	190	10:128,039,035 G / A (rs370223306)	Underlying (primary) cause of death: ICD10: C14.0 Pharynx, unspecified	0.0012	3e-67	ADAM12	Homo sapiens	MCMP|MCMPMltna|MLTN|MLTNA	190	O43184:Q5JRP2	NP_001275903.1:NP_001275904.1:NP_003465.3:NP_067673.2
Matrisome-associated	ECM Regulators	ADAMTS10	ADAM metallopeptidase with thrombospondin type 1 motif, 10	13201	19:8,670,147 C / T (rs62621197)	Standing height	0.036	5.4e-121	ADAMTS10	Homo sapiens	ADAM-TS10|WMS	13201	M0QY12:M0QY36:Q9H324	NP_001269281.1:NP_112219.3
Matrisome-associated	ECM Regulators	ADAMTS10	ADAM metallopeptidase with thrombospondin type 1 motif, 10	13201	19:8,670,147 C / T (rs62621197)	Comparative height size at age 10	0.036	9.7e-75	ADAMTS10	Homo sapiens	ADAM-TS10|WMS	13201	M0QY12:M0QY36:Q9H324	NP_001269281.1:NP_112219.3
Matrisome-associated	ECM Regulators	ADAMTS17	ADAM metallopeptidase with thrombospondin type 1 motif, 17	17109	15:100,692,953 G / A (rs72755233)	Standing height	0.11	1.3e-115	ADAMTS17	Homo sapiens	FLJ16363|FLJ32769	17109	H0YMH1:H3BRA9:H3BV94:Q8TE56	NP_620688.2
Matrisome-associated	ECM Regulators	ADAMTS17	ADAM metallopeptidase with thrombospondin type 1 motif, 17	17109	15:100,692,953 G / A (rs72755233)	Comparative height size at age 10	0.11	8.7e-71	ADAMTS17	Homo sapiens	FLJ16363|FLJ32769	17109	H0YMH1:H3BRA9:H3BV94:Q8TE56	NP_620688.2
Matrisome-associated	ECM Regulators	ADAMTS7	ADAM metallopeptidase with thrombospondin type 1 motif, 7	223	15:79,076,517 C / T (rs113477670)	Underlying (primary) cause of death: ICD10: E85.4 Organ-limited amyloidosis	0.001	4.9e-70	ADAMTS7	Homo sapiens	ADAM-TS7|DKFZp434H204	223	Q9UKP4	NP_055087.2
Matrisome-associated	ECM Regulators	ADAMTSL1	ADAMTS-like 1	14632	9:18,362,515 T / C (rs536957265)	Underlying (primary) cause of death: ICD10: I71.1 Thoracic aortic aneurysm, ruptured	0.0011	1.1e-67	ADAMTSL1	Homo sapiens	ADAMTSR1|C9orf94|DKFZp686L03130|FLJ35283|FLJ41032|	14632	A2A343:A6NIB9:F8WEP3:H7BYE3:Q8N6G6	NP_001035362.3:NP_443098.3
Matrisome-associated	ECM Regulators	ADAMTSL3	ADAMTS-like 3	14633	15:84,580,582 A / C (rs11259936)	Standing height	0.48	6.6e-104	ADAMTSL3	Homo sapiens	KIAA1233|MGC150716|MGC150717	14633	P82987	NP_997400.2:XP_005272492.1
Matrisome-associated	ECM Regulators	ADAMTSL3	ADAMTS-like 3	14633	15:84,583,810 T / A (rs2030838)	Impedance of leg (right)	0.48	2.7e-93	ADAMTSL3	Homo sapiens	KIAA1233|MGC150716|MGC150717	14633	P82987	NP_997400.2:XP_005272492.1
Matrisome-associated	ECM Regulators	ADAMTSL3	ADAMTS-like 3	14633	15:84,583,810 T / A (rs2030838)	Impedance of leg (left)	0.48	1e-84	ADAMTSL3	Homo sapiens	KIAA1233|MGC150716|MGC150717	14633	P82987	NP_997400.2:XP_005272492.1
Matrisome-associated	ECM Regulators	ADAMTSL3	ADAMTS-like 3	14633	15:84,582,124 G / T (rs4842838)	Impedance of whole body	0.48	2.1e-78	ADAMTSL3	Homo sapiens	KIAA1233|MGC150716|MGC150717	14633	P82987	NP_997400.2:XP_005272492.1
Matrisome-associated	ECM Regulators	ADAMTSL3	ADAMTS-like 3	14633	15:84,568,158 T / A (rs10906982)	Comparative height size at age 10	0.48	5.1e-62	ADAMTSL3	Homo sapiens	KIAA1233|MGC150716|MGC150717	14633	P82987	NP_997400.2:XP_005272492.1
Matrisome-associated	ECM Regulators	HTRA1	HtrA serine peptidase 1	9476	10:124,229,828 G / A (rs180899225)	Underlying (primary) cause of death: ICD10: I73.9 Peripheral vascular disease, unspecified	0.0015	2e-65	HTRA1	Homo sapiens	ARMD7|HtrA|L56|ORF480|PRSS11	9476	H0Y7G9:Q92743	NP_002766.1
Matrisome-associated	ECM Regulators	HYAL4	hyaluronoglucosaminidase 4	5323	7:123,488,221 G / A (rs535017542)	Underlying (primary) cause of death: ICD10: X70.8 Other specified place	7.1e-4	1.5e-77	HYAL4	Homo sapiens	CSHY	5323	C9J6F9:C9JU18:F8WDH9:Q2M3T9	NP_036401.2:XP_005250295.1
Matrisome-associated	ECM Regulators	KAZALD1	Kazal-type serine peptidase inhibitor domain 1	25460	10:102,833,783 T / C (rs572241057)	Underlying (primary) cause of death: ICD10: C82.9 Follicular non-Hodgkin's lymphoma, unspecified	9.1e-4	4.6e-78	KAZALD1	Homo sapiens	BONO1|FKSG28|FKSG40|FLJ24094|IGFBP-rP10	25460	Q96I82	NP_112191.2:XP_005270250.1
Matrisome-associated	ECM Regulators	LPA	lipoprotein, Lp(a)	6667	6:161,087,668 T / C (rs557400839)	Underlying (primary) cause of death: ICD10: I33.0 Acute and subacute infective endocarditis	0.0011	1e-80	LPA	Homo sapiens	AK38|APOA|LP	6667	P08519	NP_005568.2
Matrisome-associated	ECM Regulators	MEP1B	meprin A, beta	7020	18:29,784,484 G / C (rs577742544)	Underlying (primary) cause of death: ICD10: J69.0 Pneumonitis due to food and vomit	0.0017	4.6e-79	MEP1B	Homo sapiens	-	7020	J3KRK1:J3QKX5:Q16820	NP_005916.2:XP_005258332.1
Matrisome-associated	ECM Regulators	SERPINA1	serpin peptidase inhibitor, clade A (alpha-1 antiproteinase, antitrypsin), member 1	8941	14:94,844,947 C / T (rs28929474)	Standing height	0.02	6.5e-78	SERPINA1	Homo sapiens	A1A|A1AT|AAT|MGC23330|MGC9222|PI|PI1|PRO2275	8941	G3V2B9:G3V387:G3V4I7:G3V544:G3V5R8:P01009	NP_000286.3:NP_001002235.1:NP_001002236.1:NP_001121172.1:NP_001121173.1:NP_001121174.1:NP_001121175.1:NP_001121176.1:NP_001121177.1:NP_001121178.1:NP_001121179.1
Matrisome-associated	ECM-affiliated Proteins	C1QL2	complement component 1, q subcomponent-like 2	24181	2:119,886,256 G / A (rs768445700)	Underlying (primary) cause of death: ICD10: I73.9 Peripheral vascular disease, unspecified	9.1e-4	5.9e-119	C1QL2	Homo sapiens	C1QTNF10|CTRP10	24181	Q7Z5L3	NP_872334.2
Matrisome-associated	ECM-affiliated Proteins	EMCN	endomucin	16041	4:101,570,058 G / T (rs568689177)	Underlying (primary) cause of death: ICD10: K92.2 Gastro-intestinal haemorrhage, unspecified	0.0013	1.3e-63	EMCN	Homo sapiens	EMCN2|MUC14	16041	D6RHW5:H0YAA7:Q9ULC0	NP_001153166.1:NP_057326.2
Matrisome-associated	ECM-affiliated Proteins	FREM1	FRAS1 related extracellular matrix 1	23399	9:14,884,526 C / G (rs768741502)	Underlying (primary) cause of death: ICD10: C14.0 Pharynx, unspecified	0.0013	5.1e-59	FREM1	Homo sapiens	BNAR|C9orf143|C9orf145|C9orf154|FLJ25461|QBRICK|RP	23399	C9JT55:F8WE85:Q5H8C1	NP_001171175.1:NP_659403.4:XP_005251439.1:XP_005251441.1:XP_006716786.1:XP_006716792.1
Matrisome-associated	ECM-affiliated Proteins	GPC6	glypican 6	4454	13:94,075,165 C / T (rs559398818)	Underlying (primary) cause of death: ICD10: I50.0 Congestive heart failure	9e-4	1.1e-59	GPC6	Homo sapiens	MGC126288|OMIMD1	4454	Q9Y625	NP_005699.1
Matrisome-associated	ECM-affiliated Proteins	MBL2	mannose-binding lectin (protein C) 2, soluble (opsonic defect)	6922	10:54,439,699 A / G (rs7919753)	Heel bone mineral density (BMD) T-score, automated	0.11	5.3e-145	MBL2	Homo sapiens	COLEC1|HSMBPC|MBL|MBP|MBP1|MGC116832|MGC116833	6922	P11226	NP_000233.1:XP_006717924.1
Matrisome-associated	ECM-affiliated Proteins	MBL2	mannose-binding lectin (protein C) 2, soluble (opsonic defect)	6922	10:54,424,356 G / C (rs74133652)	Heel bone mineral density (BMD) T-score, automated (right)	0.11	1.3e-80	MBL2	Homo sapiens	COLEC1|HSMBPC|MBL|MBP|MBP1|MGC116832|MGC116833	6922	P11226	NP_000233.1:XP_006717924.1
Matrisome-associated	ECM-affiliated Proteins	MBL2	mannose-binding lectin (protein C) 2, soluble (opsonic defect)	6922	10:54,424,528 A / G (rs73333526)	Heel bone mineral density (BMD) T-score, automated (left)	0.11	4.6e-79	MBL2	Homo sapiens	COLEC1|HSMBPC|MBL|MBP|MBP1|MGC116832|MGC116833	6922	P11226	NP_000233.1:XP_006717924.1
Matrisome-associated	ECM-affiliated Proteins	MUC16	mucin 16, cell surface associated	15582	19:9,012,454 T / A (rs369453729)	Underlying (primary) cause of death: ICD10: I33.0 Acute and subacute infective endocarditis	0.0018	3.7e-59	MUC16	Homo sapiens	CA125|FLJ14303	15582	B5ME49:F8WE81:M0QZZ9:M0R2S7:M0R2Y5:Q8WXI7	NP_078966.2
Matrisome-associated	ECM-affiliated Proteins	MUC21	mucin 21, cell surface associated	21661	6:30,959,001 G / A (rs13211972)	Non-cancer illness code, self-reported: psoriasis	0.057	0	MUC21	Homo sapiens	C6orf205|KMQK697|MGC125609|bCX31G15.2	21661	Q5SSG8	NP_001010909.2:XP_005275180.1
Matrisome-associated	ECM-affiliated Proteins	MUC22	hypothetical LOC729792	39755	6:31,018,908 T / G (rs3131920)	Non-cancer illness code, self-reported: hyperthyroidism/thyrotoxicosis	0.15	1.5e-72	MUC22	Homo sapiens	LOC729792	39755	E2RYF6	NP_001185744.1
Matrisome-associated	ECM-affiliated Proteins	MUCL1	mucin-like 1	30588	12:55,282,907 G / A (rs547294421)	Underlying (primary) cause of death: ICD10: K83.0 Cholangitis	8.5e-4	1.4e-59	MUCL1	Homo sapiens	SBEM	30588	F8VV13:Q96DR8	NP_477521.1
Matrisome-associated	ECM-affiliated Proteins	REG3G	regenerating islet-derived 3 gamma	29595	2:79,109,945 T / C (rs137998262)	Underlying (primary) cause of death: ICD10: K92.2 Gastro-intestinal haemorrhage, unspecified	0.001	2.1e-66	REG3G	Homo sapiens	MGC118998|MGC118999|MGC119001|PAP1B|PAPIB|REG-III|	29595	Q6UW15	NP_001008388.1:NP_001256969.1:NP_940850.1:XP_005264192.1
Matrisome-associated	ECM-affiliated Proteins	SFTA2	surfactant associated 2	18386	6:30,899,051 G / C (rs3095155)	Non-cancer illness code, self-reported: malabsorption/coeliac disease	0.15	0	SFTA2	Homo sapiens	GSGL541|SFTPG|UNQ541	18386	Q6UW10	NP_995326.1
Matrisome-associated	ECM-affiliated Proteins	SFTPA2	surfactant protein A2	10799	10:81,331,674 C / G (rs776081168)	Underlying (primary) cause of death: ICD10: I71.1 Thoracic aortic aneurysm, ruptured	0.0012	9.4e-63	SFTPA2	Homo sapiens	COLEC5|FLJ50594|FLJ50597|FLJ51953|FLJ79091|FLJ9367	10799	Q8IWL1:R4GMN3:X6REF7	NP_001092138.1:XP_005270188.1:XP_005270189.1
Matrisome-associated	Secreted Factors	BMP2	bone morphogenetic protein 2	1069	20:6,612,832 A / G (rs1884897)	Standing height	0.37	1.7e-95	BMP2	Homo sapiens	BMP2A	1069	P12643	NP_001191.1
Matrisome-associated	Secreted Factors	BMP4	bone morphogenetic protein 4	1071	14:54,419,106 A / C (rs35107139)	Heel bone mineral density (BMD) T-score, automated	0.4	8.8e-67	BMP4	Homo sapiens	BMP2B|BMP2B1|MCOPS6|OFC11|ZYME	1071	H0YLW3:H0YM53:H0YMP9:P12644:V9GYF1	NP_001193.2:NP_570911.2:NP_570912.2:XP_005268072.1
Matrisome-associated	Secreted Factors	BMP6	bone morphogenetic protein 6	1073	6:7,725,760 A / T (rs3812163)	Standing height	0.47	2.8e-85	BMP6	Homo sapiens	VGR|VGR1	1073	P22004	NP_001709.1
Matrisome-associated	Secreted Factors	BRINP3	family with sequence similarity 5, member C	22393	1:190,343,106 G / A (rs557140310)	Underlying (primary) cause of death: ICD10: X78.0 Home	0.0015	5.3e-70	BRINP3	Homo sapiens	BRINP3|DBCCR1L|DBCCR1L1|RP11-445K1.1|FAM5C	22393	B1AMP1:B7Z260:Q76B58	NP_950252.1:XP_005245174.1:XP_005245175.1:XP_005245176.1:XP_005245177.1
Matrisome-associated	Secreted Factors	BRINP3	family with sequence similarity 5, member C	22393	1:190,926,378 A / G (rs528974075)	Underlying (primary) cause of death: ICD10: X78.0 Home	0.0015	4.8e-64	BRINP3	Homo sapiens	BRINP3|DBCCR1L|DBCCR1L1|RP11-445K1.1|FAM5C	22393	B1AMP1:B7Z260:Q76B58	NP_950252.1:XP_005245174.1:XP_005245175.1:XP_005245176.1:XP_005245177.1
Matrisome-associated	Secreted Factors	CSHL1	chorionic somatomammotropin hormone-like 1	2442	17:61,993,137 A / G (rs3020619)	Standing height	0.27	6.3e-89	CSHL1	Homo sapiens	CS-5|CSHP1|CSL|MGC149868|hCS-L	2442	H0YKQ4:H7C3R7:J3QT06:Q14406	NP_072101.1:NP_072102.1:NP_072103.1
Matrisome-associated	Secreted Factors	EREG	epiregulin	3443	4:75,233,100 C / G (rs138708841)	Underlying (primary) cause of death: ICD10: E85.4 Organ-limited amyloidosis	0.0026	8.2e-62	EREG	Homo sapiens	ER	3443	O14944	NP_001423.1
Matrisome-associated	Secreted Factors	FASLG	Fas ligand (TNF superfamily, member 6)	11936	1:172,805,096 G / A (rs181374665)	Underlying (primary) cause of death: ICD10: I33.0 Acute and subacute infective endocarditis	0.0016	2.2e-62	FASLG	Homo sapiens	APT1LG1|CD178|CD95L|FASL|TNFSF6	11936	P48023	NP_000630.1
Matrisome-associated	Secreted Factors	FGF5	fibroblast growth factor 5	3683	4:81,181,072 A / T (rs10857147)	Non-cancer illness code, self-reported: hypertension	0.29	1e-69	FGF5	Homo sapiens	HBGF-5|Smag-82	3683	H0Y9E2:P12034	NP_004455.2:NP_149134.1
Matrisome-associated	Secreted Factors	FGF5	fibroblast growth factor 5	3683	4:81,174,592 G / A (rs13125101)	Vascular/heart problems diagnosed by doctor: High blood pressure	0.29	1.6e-67	FGF5	Homo sapiens	HBGF-5|Smag-82	3683	H0Y9E2:P12034	NP_004455.2:NP_149134.1
Matrisome-associated	Secreted Factors	FGF5	fibroblast growth factor 5	3683	4:81,181,072 A / T (rs10857147)	Vascular/heart problems diagnosed by doctor: None of the above	0.29	2.1e-60	FGF5	Homo sapiens	HBGF-5|Smag-82	3683	H0Y9E2:P12034	NP_004455.2:NP_149134.1
Matrisome-associated	Secreted Factors	FLG	filaggrin	3748	1:152,285,861 G / A (rs61816761)	Non-cancer illness code, self-reported: eczema/dermatitis	0.023	2.5e-86	FLG	Homo sapiens	ATOD2	3748	P20930	NP_002007.1
Matrisome-associated	Secreted Factors	GDF5	growth differentiation factor 5	4220	20:34,025,756 A / G (rs143384)	Standing height	0.4	8.8e-292	GDF5	Homo sapiens	BMP14|CDMP1|LAP4|OS5|SYNS2	4220	P43026	NP_000548.2
Matrisome-associated	Secreted Factors	GDF5	growth differentiation factor 5	4220	20:34,025,756 A / G (rs143384)	Sitting height	0.4	5.8e-251	GDF5	Homo sapiens	BMP14|CDMP1|LAP4|OS5|SYNS2	4220	P43026	NP_000548.2
Matrisome-associated	Secreted Factors	GDF5	growth differentiation factor 5	4220	20:34,025,756 A / G (rs143384)	Comparative height size at age 10	0.4	2.8e-155	GDF5	Homo sapiens	BMP14|CDMP1|LAP4|OS5|SYNS2	4220	P43026	NP_000548.2
Matrisome-associated	Secreted Factors	GDF5	growth differentiation factor 5	4220	20:34,025,756 A / G (rs143384)	Trunk fat-free mass	0.4	5.2e-139	GDF5	Homo sapiens	BMP14|CDMP1|LAP4|OS5|SYNS2	4220	P43026	NP_000548.2
Matrisome-associated	Secreted Factors	GDF5	growth differentiation factor 5	4220	20:34,025,756 A / G (rs143384)	Trunk predicted mass	0.4	1.9e-138	GDF5	Homo sapiens	BMP14|CDMP1|LAP4|OS5|SYNS2	4220	P43026	NP_000548.2
Matrisome-associated	Secreted Factors	GDF5	growth differentiation factor 5	4220	20:34,025,756 A / G (rs143384)	Whole body fat-free mass	0.4	6e-130	GDF5	Homo sapiens	BMP14|CDMP1|LAP4|OS5|SYNS2	4220	P43026	NP_000548.2
Matrisome-associated	Secreted Factors	GDF5	growth differentiation factor 5	4220	20:34,025,756 A / G (rs143384)	Whole body water mass	0.4	1.3e-126	GDF5	Homo sapiens	BMP14|CDMP1|LAP4|OS5|SYNS2	4220	P43026	NP_000548.2
Matrisome-associated	Secreted Factors	GDF5	growth differentiation factor 5	4220	20:34,025,756 A / G (rs143384)	Basal metabolic rate	0.4	2.3e-111	GDF5	Homo sapiens	BMP14|CDMP1|LAP4|OS5|SYNS2	4220	P43026	NP_000548.2
Matrisome-associated	Secreted Factors	GDF5	growth differentiation factor 5	4220	20:34,025,756 A / G (rs143384)	Leg predicted mass (right)	0.4	2.4e-109	GDF5	Homo sapiens	BMP14|CDMP1|LAP4|OS5|SYNS2	4220	P43026	NP_000548.2
Matrisome-associated	Secreted Factors	GDF5	growth differentiation factor 5	4220	20:34,025,756 A / G (rs143384)	Leg fat-free mass (right)	0.4	3.6e-109	GDF5	Homo sapiens	BMP14|CDMP1|LAP4|OS5|SYNS2	4220	P43026	NP_000548.2
Matrisome-associated	Secreted Factors	GDF5	growth differentiation factor 5	4220	20:34,025,756 A / G (rs143384)	Leg predicted mass (left)	0.4	1.8e-104	GDF5	Homo sapiens	BMP14|CDMP1|LAP4|OS5|SYNS2	4220	P43026	NP_000548.2
Matrisome-associated	Secreted Factors	GDF5	growth differentiation factor 5	4220	20:34,025,756 A / G (rs143384)	Leg fat-free mass (left)	0.4	3.4e-104	GDF5	Homo sapiens	BMP14|CDMP1|LAP4|OS5|SYNS2	4220	P43026	NP_000548.2
Matrisome-associated	Secreted Factors	GDF5	growth differentiation factor 5	4220	20:34,025,756 A / G (rs143384)	Arm fat-free mass (right)	0.4	1.7e-98	GDF5	Homo sapiens	BMP14|CDMP1|LAP4|OS5|SYNS2	4220	P43026	NP_000548.2
Matrisome-associated	Secreted Factors	GDF5	growth differentiation factor 5	4220	20:34,025,756 A / G (rs143384)	Arm predicted mass (right)	0.4	2.2e-98	GDF5	Homo sapiens	BMP14|CDMP1|LAP4|OS5|SYNS2	4220	P43026	NP_000548.2
Matrisome-associated	Secreted Factors	GDF5	growth differentiation factor 5	4220	20:34,025,756 A / G (rs143384)	Arm predicted mass (left)	0.4	2.8e-97	GDF5	Homo sapiens	BMP14|CDMP1|LAP4|OS5|SYNS2	4220	P43026	NP_000548.2
Matrisome-associated	Secreted Factors	GDF5	growth differentiation factor 5	4220	20:34,025,756 A / G (rs143384)	Arm fat-free mass (left)	0.4	5e-96	GDF5	Homo sapiens	BMP14|CDMP1|LAP4|OS5|SYNS2	4220	P43026	NP_000548.2
Matrisome-associated	Secreted Factors	HHIP	hedgehog interacting protein	14866	4:145,566,477 T / C (rs1355603)	Standing height	0.17	1.4e-162	HHIP	Homo sapiens	FLJ20992|FLJ90230|HIP	14866	Q96QV1	NP_071920.1
Matrisome-associated	Secreted Factors	HHIP	hedgehog interacting protein	14866	4:145,566,848 C / T (rs13125694)	Sitting height	0.43	3.3e-106	HHIP	Homo sapiens	FLJ20992|FLJ90230|HIP	14866	Q96QV1	NP_071920.1
Matrisome-associated	Secreted Factors	HHIP	hedgehog interacting protein	14866	4:145,566,864 T / C (rs13106087)	Comparative height size at age 10	0.17	1.5e-83	HHIP	Homo sapiens	FLJ20992|FLJ90230|HIP	14866	Q96QV1	NP_071920.1
Matrisome-associated	Secreted Factors	HHIP	hedgehog interacting protein	14866	4:145,437,081 C / A (rs7698984)	Peak expiratory flow (PEF)	0.46	2.7e-63	HHIP	Homo sapiens	FLJ20992|FLJ90230|HIP	14866	Q96QV1	NP_071920.1
Matrisome-associated	Secreted Factors	IL10	interleukin 10	5962	1:206,946,634 A / G (rs1800871)	Mouth/teeth dental problems: Mouth ulcers	0.22	1.5e-58	IL10	Homo sapiens	CSIF|IL-10|IL10A|MGC126450|MGC126451|TGIF	5962	P22301	NP_000563.1
Matrisome-associated	Secreted Factors	KITLG	KIT ligand	6343	12:89,241,149 G / T (rs182465470)	Underlying (primary) cause of death: ICD10: I35.9 Aortic valve disorder, unspecified	8.3e-4	3e-63	KITLG	Homo sapiens	DKFZp686F2250|FPH2|KL-1|Kitl|MGF|SCF|SF|SHEP7	6343	P21583:S4R384:S4R442	NP_000890.1:NP_003985.2
Matrisome-associated	Secreted Factors	NGF	nerve growth factor (beta polypeptide)	7808	1:115,925,042 T / C (rs541881307)	Underlying (primary) cause of death: ICD10: C53.9 Cervix uteri, unspecified	8.9e-4	2e-60	NGF	Homo sapiens	Beta-NGF|HSAN5|MGC161426|MGC161428|NGFB	7808	P01138	NP_002497.2:XP_006710726.1:XP_006710727.1:XP_006710728.1
Matrisome-associated	Secreted Factors	NRG1	neuregulin 1	7997	8:32,173,343 A / C (rs181100524)	Underlying (primary) cause of death: ICD10: J69.0 Pneumonitis due to food and vomit	0.001	6.8e-64	NRG1	Homo sapiens	ARIA|GGF|GGF2|HGL|HRG|HRG1|HRGA|NDF|SMDF	7997	B7Z1E3:E5RHP6:E5RHQ1:E5RIG8:E7EX30:F8W9E3:H0YBA3:H0YCP0:H0YDC2:H7BXY2:Q02297	NP_001153467.1:NP_001153471.1:NP_001153473.1:NP_001153477.1:NP_001153480.1:NP_039250.2:NP_039251.2:NP_039252.2:NP_039253.1:NP_039254.1:NP_039256.2:NP_039258.1
Matrisome-associated	Secreted Factors	PGF	placental growth factor	8893	14:75,435,865 C / T (rs563578866)	Underlying (primary) cause of death: ICD10: C81.9 Hodgkin's disease, unspecified	0.0015	7.9e-139	PGF	Homo sapiens	D12S1900|PGFL|PLGF|PlGF-2|SHGC-10760	8893	G3XA84:P49763	NP_001193941.1:NP_002623.2:XP_005267818.1
Matrisome-associated	Secreted Factors	SFRP4	secreted frizzled-related protein 4	10778	7:38,091,354 T / C (rs1717736)	Heel bone mineral density (BMD) T-score, automated	0.18	6.6e-85	SFRP4	Homo sapiens	FRP-4|FRPHE|MGC26498	10778	C9JMJ2:Q6FHJ7	NP_003005.2
Matrisome-associated	Secreted Factors	WNT16	wingless-type MMTV integration site family, member 16	16267	7:120,962,164 A / G (rs2908007)	Heel bone mineral density (BMD) T-score, automated (left)	0.4	0	WNT16	Homo sapiens	-	16267	E9PH60:Q9UBV4	NP_057171.2:NP_057171.2:NP_476509.1
Matrisome-associated	Secreted Factors	WNT16	wingless-type MMTV integration site family, member 16	16267	7:120,962,164 A / G (rs2908007)	Heel bone mineral density (BMD) T-score, automated (right)	0.4	0	WNT16	Homo sapiens	-	16267	E9PH60:Q9UBV4	NP_057171.2:NP_057171.2:NP_476509.1
Matrisome-associated	Secreted Factors	WNT7B	wingless-type MMTV integration site family, member 7B	12787	22:46,367,144 G / A (rs28971325)	Diagnoses - main ICD10: M72 Fibroblastic disorders	0.23	3.3e-227	WNT7B	Homo sapiens	-	12787	A8K0G1:B8A595:B8A597:B8A598:P56706	NP_478679.1
