# Supplementary material for: The Human Extracellular Matrix Diseasome Reveals Genotype–Phenotype Associations with Clinical Implications for Age-Related Diseases
Source: Biomedicines. 2023 Apr 19;11(4):1212. doi: 10.3390/biomedicines11041212 (PMC10135578; doi:10.3390/biomedicines11041212)
Supplement: Supplementary file 1 [file biomedicines-11-01212-s001.zip › Table_S8_ECM diseasome.csv]

division	category	Gene Symbol	Gene Name	geneid	UniProt_IDs	Refseq_IDs	Disease	Polymorphism
Core matrisome	Collagens	COL10A1	collagen, type X, alpha 1	2185	Q03692:Q5QPC7:Q5QPC8	NP_000484.2:XP_006715395.1:XP_006715396.1	Metaphyseal chondrodysplasia, Schmid	p.CYS591ARG
Core matrisome	Collagens	COL10A1	collagen, type X, alpha 1	2185	Q03692:Q5QPC7:Q5QPC8	NP_000484.2:XP_006715395.1:XP_006715396.1	Metaphyseal chondrodysplasia, Schmid	p.GLY18ARG
Core matrisome	Collagens	COL10A1	collagen, type X, alpha 1	2185	Q03692:Q5QPC7:Q5QPC8	NP_000484.2:XP_006715395.1:XP_006715396.1	Metaphyseal chondrodysplasia, Schmid	p.GLY18GLU
Core matrisome	Collagens	COL10A1	collagen, type X, alpha 1	2185	Q03692:Q5QPC7:Q5QPC8	NP_000484.2:XP_006715395.1:XP_006715396.1	Metaphyseal chondrodysplasia, Schmid	p.GLY595GLU
Core matrisome	Collagens	COL10A1	collagen, type X, alpha 1	2185	Q03692:Q5QPC7:Q5QPC8	NP_000484.2:XP_006715395.1:XP_006715396.1	Metaphyseal chondrodysplasia, Schmid	p.LEU614PRO
Core matrisome	Collagens	COL10A1	collagen, type X, alpha 1	2185	Q03692:Q5QPC7:Q5QPC8	NP_000484.2:XP_006715395.1:XP_006715396.1	Metaphyseal chondrodysplasia, Schmid	p.SER600PRO
Core matrisome	Collagens	COL10A1	collagen, type X, alpha 1	2185	Q03692:Q5QPC7:Q5QPC8	NP_000484.2:XP_006715395.1:XP_006715396.1	Metaphyseal chondrodysplasia, Schmid	p.SER671PRO
Core matrisome	Collagens	COL10A1	collagen, type X, alpha 1	2185	Q03692:Q5QPC7:Q5QPC8	NP_000484.2:XP_006715395.1:XP_006715396.1	Metaphyseal chondrodysplasia, Schmid	p.TRP611TER
Core matrisome	Collagens	COL10A1	collagen, type X, alpha 1	2185	Q03692:Q5QPC7:Q5QPC8	NP_000484.2:XP_006715395.1:XP_006715396.1	Metaphyseal chondrodysplasia, Schmid	p.TRP651ARG
Core matrisome	Collagens	COL10A1	collagen, type X, alpha 1	2185	Q03692:Q5QPC7:Q5QPC8	NP_000484.2:XP_006715395.1:XP_006715396.1	Metaphyseal chondrodysplasia, Schmid	p.TRP651TER
Core matrisome	Collagens	COL10A1	collagen, type X, alpha 1	2185	Q03692:Q5QPC7:Q5QPC8	NP_000484.2:XP_006715395.1:XP_006715396.1	Metaphyseal chondrodysplasia, Schmid	p.TYR597CYS
Core matrisome	Collagens	COL10A1	collagen, type X, alpha 1	2185	Q03692:Q5QPC7:Q5QPC8	NP_000484.2:XP_006715395.1:XP_006715396.1	Metaphyseal chondrodysplasia, Schmid	p.TYR598ASP
Core matrisome	Collagens	COL10A1	collagen, type X, alpha 1	2185	Q03692:Q5QPC7:Q5QPC8	NP_000484.2:XP_006715395.1:XP_006715396.1	Metaphyseal chondrodysplasia, Schmid	p.TYR628TER
Core matrisome	Collagens	COL10A1	collagen, type X, alpha 1	2185	Q03692:Q5QPC7:Q5QPC8	NP_000484.2:XP_006715395.1:XP_006715396.1	Metaphyseal chondrodysplasia, Schmid	p.TYR632TER
Core matrisome	Collagens	COL10A1	collagen, type X, alpha 1	2185	Q03692:Q5QPC7:Q5QPC8	NP_000484.2:XP_006715395.1:XP_006715396.1	Metaphyseal chondrodysplasia, Schmid type (3)	NA
Core matrisome	Collagens	COL10A1	collagen, type X, alpha 1	2185	Q03692:Q5QPC7:Q5QPC8	NP_000484.2:XP_006715395.1:XP_006715396.1	Spondylometaphyseal dysplasia, Japanese type (3)	NA
Core matrisome	Collagens	COL10A1	collagen, type X, alpha 1	2185	Q03692:Q5QPC7:Q5QPC8	NP_000484.2:XP_006715395.1:XP_006715396.1	Schmid metaphyseal chondrodysplasia	NA
Core matrisome	Collagens	COL11A1	collagen, type XI, alpha 1	2186	C9JMN2:H7C381:P12107	NP_001177638.1:NP_001845.3:NP_542196.2:NP_542197.3	Stickler syndrome	p.GLY625VAL
Core matrisome	Collagens	COL11A1	collagen, type XI, alpha 1	2186	C9JMN2:H7C381:P12107	NP_001177638.1:NP_001845.3:NP_542196.2:NP_542197.3	MARSHALL/STICKLER SYNDROME	p.GLY988VAL
Core matrisome	Collagens	COL11A1	collagen, type XI, alpha 1	2186	C9JMN2:H7C381:P12107	NP_001177638.1:NP_001845.3:NP_542196.2:NP_542197.3	Marshall syndrome, 154780 (3)	NA
Core matrisome	Collagens	COL11A1	collagen, type XI, alpha 1	2186	C9JMN2:H7C381:P12107	NP_001177638.1:NP_001845.3:NP_542196.2:NP_542197.3	Stickler syndrome, type II, 604841 (3)	NA
Core matrisome	Collagens	COL11A1	collagen, type XI, alpha 1	2186	C9JMN2:H7C381:P12107	NP_001177638.1:NP_001845.3:NP_542196.2:NP_542197.3	autosomal dominant myopia-midfacial retrusion-sensorineural hearing loss-rhizomelic dysplasia syndrome	NA
Core matrisome	Collagens	COL11A1	collagen, type XI, alpha 1	2186	C9JMN2:H7C381:P12107	NP_001177638.1:NP_001845.3:NP_542196.2:NP_542197.3	autosomal recessive Stickler syndrome	NA
Core matrisome	Collagens	COL11A1	collagen, type XI, alpha 1	2186	C9JMN2:H7C381:P12107	NP_001177638.1:NP_001845.3:NP_542196.2:NP_542197.3	fibrochondrogenesis	NA
Core matrisome	Collagens	COL11A1	collagen, type XI, alpha 1	2186	C9JMN2:H7C381:P12107	NP_001177638.1:NP_001845.3:NP_542196.2:NP_542197.3	fibrochondrogenesis 1	NA
Core matrisome	Collagens	COL11A1	collagen, type XI, alpha 1	2186	C9JMN2:H7C381:P12107	NP_001177638.1:NP_001845.3:NP_542196.2:NP_542197.3	Marshall syndrome	NA
Core matrisome	Collagens	COL11A1	collagen, type XI, alpha 1	2186	C9JMN2:H7C381:P12107	NP_001177638.1:NP_001845.3:NP_542196.2:NP_542197.3	Stickler syndrome type 2	NA
Core matrisome	Collagens	COL11A2	collagen, type XI, alpha 2	2187	A2AAS7:H0Y3B3:H0Y3B5:H0Y3M9:H0YHM5:H0YHM9:H0YIS1:P13942:Q4VXY6	NP_001157243.1:NP_542411.2:NP_542412.2:NP_542410.2:NP_542412.2	Otospondylomegaepiphyseal dysplasia	p.ARG1331TER
Core matrisome	Collagens	COL11A2	collagen, type XI, alpha 2	2187	A2AAS7:H0Y3B3:H0Y3B5:H0Y3M9:H0YHM5:H0YHM9:H0YIS1:P13942:Q4VXY6	NP_001157243.1:NP_542411.2:NP_542412.2:NP_542410.2:NP_542412.2	Stickler syndrome, type 3	p.ARG1379TER
Core matrisome	Collagens	COL11A2	collagen, type XI, alpha 2	2187	A2AAS7:H0Y3B3:H0Y3B5:H0Y3M9:H0YHM5:H0YHM9:H0YIS1:P13942:Q4VXY6	NP_001157243.1:NP_542411.2:NP_542412.2:NP_542410.2:NP_542412.2	WZS	p.GLY1441GLU
Core matrisome	Collagens	COL11A2	collagen, type XI, alpha 2	2187	A2AAS7:H0Y3B3:H0Y3B5:H0Y3M9:H0YHM5:H0YHM9:H0YIS1:P13942:Q4VXY6	NP_001157243.1:NP_542411.2:NP_542412.2:NP_542410.2:NP_542412.2	OSMED	p.GLY661ARG
Core matrisome	Collagens	COL11A2	collagen, type XI, alpha 2	2187	A2AAS7:H0Y3B3:H0Y3B5:H0Y3M9:H0YHM5:H0YHM9:H0YIS1:P13942:Q4VXY6	NP_001157243.1:NP_542411.2:NP_542412.2:NP_542410.2:NP_542412.2	DFNB53	p.PRO621THR
Core matrisome	Collagens	COL11A2	collagen, type XI, alpha 2	2187	A2AAS7:H0Y3B3:H0Y3B5:H0Y3M9:H0YHM5:H0YHM9:H0YIS1:P13942:Q4VXY6	NP_001157243.1:NP_542411.2:NP_542412.2:NP_542410.2:NP_542412.2	Otospondylomegaepiphyseal dysplasia	p.SER831LEU
Core matrisome	Collagens	COL11A2	collagen, type XI, alpha 2	2187	A2AAS7:H0Y3B3:H0Y3B5:H0Y3M9:H0YHM5:H0YHM9:H0YIS1:P13942:Q4VXY6	NP_001157243.1:NP_542411.2:NP_542412.2:NP_542410.2:NP_542412.2	Deafness, autosomal dominant 13, 601868 (3)	NA
Core matrisome	Collagens	COL11A2	collagen, type XI, alpha 2	2187	A2AAS7:H0Y3B3:H0Y3B5:H0Y3M9:H0YHM5:H0YHM9:H0YIS1:P13942:Q4VXY6	NP_001157243.1:NP_542411.2:NP_542412.2:NP_542410.2:NP_542412.2	OSMED syndrome, 215150 (3)	NA
Core matrisome	Collagens	COL11A2	collagen, type XI, alpha 2	2187	A2AAS7:H0Y3B3:H0Y3B5:H0Y3M9:H0YHM5:H0YHM9:H0YIS1:P13942:Q4VXY6	NP_001157243.1:NP_542411.2:NP_542412.2:NP_542410.2:NP_542412.2	Stickler syndrome, type III, 184840 (3)	NA
Core matrisome	Collagens	COL11A2	collagen, type XI, alpha 2	2187	A2AAS7:H0Y3B3:H0Y3B5:H0Y3M9:H0YHM5:H0YHM9:H0YIS1:P13942:Q4VXY6	NP_001157243.1:NP_542411.2:NP_542412.2:NP_542410.2:NP_542412.2	Weissenbacher-Zweymuller syndrome, 277610 (3)	NA
Core matrisome	Collagens	COL11A2	collagen, type XI, alpha 2	2187	A2AAS7:H0Y3B3:H0Y3B5:H0Y3M9:H0YHM5:H0YHM9:H0YIS1:P13942:Q4VXY6	NP_001157243.1:NP_542411.2:NP_542412.2:NP_542410.2:NP_542412.2	autosomal dominant nonsyndromic deafness	NA
Core matrisome	Collagens	COL11A2	collagen, type XI, alpha 2	2187	A2AAS7:H0Y3B3:H0Y3B5:H0Y3M9:H0YHM5:H0YHM9:H0YIS1:P13942:Q4VXY6	NP_001157243.1:NP_542411.2:NP_542412.2:NP_542410.2:NP_542412.2	autosomal dominant nonsyndromic deafness 13	NA
Core matrisome	Collagens	COL11A2	collagen, type XI, alpha 2	2187	A2AAS7:H0Y3B3:H0Y3B5:H0Y3M9:H0YHM5:H0YHM9:H0YIS1:P13942:Q4VXY6	NP_001157243.1:NP_542411.2:NP_542412.2:NP_542410.2:NP_542412.2	autosomal recessive nonsyndromic deafness	NA
Core matrisome	Collagens	COL11A2	collagen, type XI, alpha 2	2187	A2AAS7:H0Y3B3:H0Y3B5:H0Y3M9:H0YHM5:H0YHM9:H0YIS1:P13942:Q4VXY6	NP_001157243.1:NP_542411.2:NP_542412.2:NP_542410.2:NP_542412.2	autosomal recessive nonsyndromic deafness 53	NA
Core matrisome	Collagens	COL11A2	collagen, type XI, alpha 2	2187	A2AAS7:H0Y3B3:H0Y3B5:H0Y3M9:H0YHM5:H0YHM9:H0YIS1:P13942:Q4VXY6	NP_001157243.1:NP_542411.2:NP_542412.2:NP_542410.2:NP_542412.2	fibrochondrogenesis	NA
Core matrisome	Collagens	COL11A2	collagen, type XI, alpha 2	2187	A2AAS7:H0Y3B3:H0Y3B5:H0Y3M9:H0YHM5:H0YHM9:H0YIS1:P13942:Q4VXY6	NP_001157243.1:NP_542411.2:NP_542412.2:NP_542410.2:NP_542412.2	fibrochondrogenesis 2	NA
Core matrisome	Collagens	COL11A2	collagen, type XI, alpha 2	2187	A2AAS7:H0Y3B3:H0Y3B5:H0Y3M9:H0YHM5:H0YHM9:H0YIS1:P13942:Q4VXY6	NP_001157243.1:NP_542411.2:NP_542412.2:NP_542410.2:NP_542412.2	otospondylomegaepiphyseal dysplasia	NA
Core matrisome	Collagens	COL11A2	collagen, type XI, alpha 2	2187	A2AAS7:H0Y3B3:H0Y3B5:H0Y3M9:H0YHM5:H0YHM9:H0YIS1:P13942:Q4VXY6	NP_001157243.1:NP_542411.2:NP_542412.2:NP_542410.2:NP_542412.2	otospondylomegaepiphyseal dysplasia, autosomal recessive	NA
Core matrisome	Collagens	COL11A2	collagen, type XI, alpha 2	2187	A2AAS7:H0Y3B3:H0Y3B5:H0Y3M9:H0YHM5:H0YHM9:H0YIS1:P13942:Q4VXY6	NP_001157243.1:NP_542411.2:NP_542412.2:NP_542410.2:NP_542412.2	Stickler syndrome type 3	NA
Core matrisome	Collagens	COL11A2	collagen, type XI, alpha 2	2187	A2AAS7:H0Y3B3:H0Y3B5:H0Y3M9:H0YHM5:H0YHM9:H0YIS1:P13942:Q4VXY6	NP_001157243.1:NP_542411.2:NP_542412.2:NP_542410.2:NP_542412.2	Weissenbacher-Zweymuller syndrome	NA
Core matrisome	Collagens	COL12A1	collagen, type XII, alpha 1	2188	D6RGG3:H0Y4P7:H0Y5N9:H0Y991:Q99715	NP_004361.3:NP_542376.2	Bethlem myopathy	NA
Core matrisome	Collagens	COL12A1	collagen, type XII, alpha 1	2188	D6RGG3:H0Y4P7:H0Y5N9:H0Y991:Q99715	NP_004361.3:NP_542376.2	Bethlem myopathy 2	NA
Core matrisome	Collagens	COL12A1	collagen, type XII, alpha 1	2188	D6RGG3:H0Y4P7:H0Y5N9:H0Y991:Q99715	NP_004361.3:NP_542376.2	Ullrich congenital muscular dystrophy	NA
Core matrisome	Collagens	COL13A1	collagen, type XIII, alpha 1	2190	E7ES46:E7ES47:E7ES49:E7ES50:E7ES51:E7ES55:E7ES56:E7EX21:E9PEG9:G5E987:H7BYT9:H7BZB6:Q5TAT6	NP_001123575.1:NP_542988.3:NP_542990.3:NP_542991.3:NP_542992.3:NP_542995.3	congenital myasthenic syndrome 19	NA
Core matrisome	Collagens	COL13A1	collagen, type XIII, alpha 1	2190	E7ES46:E7ES47:E7ES49:E7ES50:E7ES51:E7ES55:E7ES56:E7EX21:E9PEG9:G5E987:H7BYT9:H7BZB6:Q5TAT6	NP_001123575.1:NP_542988.3:NP_542990.3:NP_542991.3:NP_542992.3:NP_542995.3	postsynaptic congenital myasthenic syndrome	NA
Core matrisome	Collagens	COL13A1	collagen, type XIII, alpha 1	2190	E7ES46:E7ES47:E7ES49:E7ES50:E7ES51:E7ES55:E7ES56:E7EX21:E9PEG9:G5E987:H7BYT9:H7BZB6:Q5TAT6	NP_001123575.1:NP_542988.3:NP_542990.3:NP_542991.3:NP_542992.3:NP_542995.3	presynaptic congenital myasthenic syndrome	NA
Core matrisome	Collagens	COL14A1	collagen, type XIV, alpha 1	2191	H0YBB2:J3QT75:J3QT83:Q05707:Q4G0W3	NP_066933.1:XP_005251116.1:XP_006716714.1	punctate palmoplantar keratoderma type 1	NA
Core matrisome	Collagens	COL17A1	collagen, type XVII, alpha 1	2194	A2A2Y8:H0Y420:Q9UMD9	NP_000485.3	Adult junctional epidermolysis bullosa	p.ARG1226TER
Core matrisome	Collagens	COL17A1	collagen, type XVII, alpha 1	2194	A2A2Y8:H0Y420:Q9UMD9	NP_000485.3	Epidermolysis bullosa, junctional	p.ARG1303GLN
Core matrisome	Collagens	COL17A1	collagen, type XVII, alpha 1	2194	A2A2Y8:H0Y420:Q9UMD9	NP_000485.3	Adult junctional epidermolysis bullosa	p.ARG145TER
Core matrisome	Collagens	COL17A1	collagen, type XVII, alpha 1	2194	A2A2Y8:H0Y420:Q9UMD9	NP_000485.3	Adult junctional epidermolysis bullosa	p.GLN1023TER
Core matrisome	Collagens	COL17A1	collagen, type XVII, alpha 1	2194	A2A2Y8:H0Y420:Q9UMD9	NP_000485.3	Adult junctional epidermolysis bullosa	p.GLY633ASP
Core matrisome	Collagens	COL17A1	collagen, type XVII, alpha 1	2194	A2A2Y8:H0Y420:Q9UMD9	NP_000485.3	Adult junctional epidermolysis bullosa	p.LEU855TER
Core matrisome	Collagens	COL17A1	collagen, type XVII, alpha 1	2194	A2A2Y8:H0Y420:Q9UMD9	NP_000485.3	Epidermolysis bullosa, generalized atrophic benign, 226650 (3)	NA
Core matrisome	Collagens	COL17A1	collagen, type XVII, alpha 1	2194	A2A2Y8:H0Y420:Q9UMD9	NP_000485.3	epithelial recurrent erosion dystrophy	NA
Core matrisome	Collagens	COL17A1	collagen, type XVII, alpha 1	2194	A2A2Y8:H0Y420:Q9UMD9	NP_000485.3	generalized junctional epidermolysis bullosa non-Herlitz type	NA
Core matrisome	Collagens	COL17A1	collagen, type XVII, alpha 1	2194	A2A2Y8:H0Y420:Q9UMD9	NP_000485.3	junctional epidermolysis bullosa, non-Herlitz type	NA
Core matrisome	Collagens	COL17A1	collagen, type XVII, alpha 1	2194	A2A2Y8:H0Y420:Q9UMD9	NP_000485.3	late-onset junctional epidermolysis bullosa	NA
Core matrisome	Collagens	COL17A1	collagen, type XVII, alpha 1	2194	A2A2Y8:H0Y420:Q9UMD9	NP_000485.3	localized junctional epidermolysis bullosa, non-Herlitz type	NA
Core matrisome	Collagens	COL18A1	collagen, type XVIII, alpha 1	2195	H7BXV5:H7C457:P39060	NP_085059.2:NP_569712.2	Knobloch syndrome 1	p.ASP1437ASN
Core matrisome	Collagens	COL18A1	collagen, type XVIII, alpha 1	2195	H7BXV5:H7C457:P39060	NP_085059.2:NP_569712.2	Knobloch syndrome, 267750 (3)	NA
Core matrisome	Collagens	COL18A1	collagen, type XVIII, alpha 1	2195	H7BXV5:H7C457:P39060	NP_085059.2:NP_569712.2	Knobloch syndrome	NA
Core matrisome	Collagens	COL1A1	collagen, type I, alpha 1	2197	I3L3H7:P02452	NP_000079.2	Osteogenesis imperfecta	p.ALA348THR
Core matrisome	Collagens	COL1A1	collagen, type I, alpha 1	2197	I3L3H7:P02452	NP_000079.2	Caffey disease	p.ARG1014CYS
Core matrisome	Collagens	COL1A1	collagen, type I, alpha 1	2197	I3L3H7:P02452	NP_000079.2	Osteogenesis imperfecta type I	p.ARG1141TER
Core matrisome	Collagens	COL1A1	collagen, type I, alpha 1	2197	I3L3H7:P02452	NP_000079.2	Ehlers-Danlos syndrome	p.ARG312CYS
Core matrisome	Collagens	COL1A1	collagen, type I, alpha 1	2197	I3L3H7:P02452	NP_000079.2	Osteogenesis imperfecta	p.ARG528HIS
Core matrisome	Collagens	COL1A1	collagen, type I, alpha 1	2197	I3L3H7:P02452	NP_000079.2	Osteogenesis imperfecta	p.ARG865HIS
Core matrisome	Collagens	COL1A1	collagen, type I, alpha 1	2197	I3L3H7:P02452	NP_000079.2	Osteogenesis imperfecta	p.GLN688TER
Core matrisome	Collagens	COL1A1	collagen, type I, alpha 1	2197	I3L3H7:P02452	NP_000079.2	Osteogenesis imperfecta	p.GLN721TER
Core matrisome	Collagens	COL1A1	collagen, type I, alpha 1	2197	I3L3H7:P02452	NP_000079.2	Osteogenesis imperfecta	p.GLN966ARG
Core matrisome	Collagens	COL1A1	collagen, type I, alpha 1	2197	I3L3H7:P02452	NP_000079.2	OI4	p.GLY1010SER
Core matrisome	Collagens	COL1A1	collagen, type I, alpha 1	2197	I3L3H7:P02452	NP_000079.2	Osteogenesis imperfecta III	p.GLY1022SER
Core matrisome	Collagens	COL1A1	collagen, type I, alpha 1	2197	I3L3H7:P02452	NP_000079.2	OI2	p.GLY1025ARG
Core matrisome	Collagens	COL1A1	collagen, type I, alpha 1	2197	I3L3H7:P02452	NP_000079.2	OI2	p.GLY1040SER
Core matrisome	Collagens	COL1A1	collagen, type I, alpha 1	2197	I3L3H7:P02452	NP_000079.2	OI2	p.GLY1061ASP
Core matrisome	Collagens	COL1A1	collagen, type I, alpha 1	2197	I3L3H7:P02452	NP_000079.2	OI1	p.GLY1079SER
Core matrisome	Collagens	COL1A1	collagen, type I, alpha 1	2197	I3L3H7:P02452	NP_000079.2	OI2	p.GLY1082CYS
Core matrisome	Collagens	COL1A1	collagen, type I, alpha 1	2197	I3L3H7:P02452	NP_000079.2	OI2	p.GLY1091SER
Core matrisome	Collagens	COL1A1	collagen, type I, alpha 1	2197	I3L3H7:P02452	NP_000079.2	OI2	p.GLY1151VAL
Core matrisome	Collagens	COL1A1	collagen, type I, alpha 1	2197	I3L3H7:P02452	NP_000079.2	OI2	p.GLY1166CYS
Core matrisome	Collagens	COL1A1	collagen, type I, alpha 1	2197	I3L3H7:P02452	NP_000079.2	Osteogenesis imperfecta III	p.GLY1181SER
Core matrisome	Collagens	COL1A1	collagen, type I, alpha 1	2197	I3L3H7:P02452	NP_000079.2	OI2	p.GLY1184VAL
Core matrisome	Collagens	COL1A1	collagen, type I, alpha 1	2197	I3L3H7:P02452	NP_000079.2	Osteogenesis imperfecta III	p.GLY1187SER
Core matrisome	Collagens	COL1A1	collagen, type I, alpha 1	2197	I3L3H7:P02452	NP_000079.2	Osteogenesis imperfecta	p.GLY173TER
Core matrisome	Collagens	COL1A1	collagen, type I, alpha 1	2197	I3L3H7:P02452	NP_000079.2	OI1	p.GLY221CYS
Core matrisome	Collagens	COL1A1	collagen, type I, alpha 1	2197	I3L3H7:P02452	NP_000079.2	Osteogenesis imperfecta III	p.GLY254GLU
Core matrisome	Collagens	COL1A1	collagen, type I, alpha 1	2197	I3L3H7:P02452	NP_000079.2	OI1	p.GLY272CYS
Core matrisome	Collagens	COL1A1	collagen, type I, alpha 1	2197	I3L3H7:P02452	NP_000079.2	OI2	p.GLY275ASP
Core matrisome	Collagens	COL1A1	collagen, type I, alpha 1	2197	I3L3H7:P02452	NP_000079.2	Osteogenesis imperfecta III	p.GLY332ARG
Core matrisome	Collagens	COL1A1	collagen, type I, alpha 1	2197	I3L3H7:P02452	NP_000079.2	Osteogenesis imperfecta	p.GLY341CYS
Core matrisome	Collagens	COL1A1	collagen, type I, alpha 1	2197	I3L3H7:P02452	NP_000079.2	OI4	p.GLY353CYS
Core matrisome	Collagens	COL1A1	collagen, type I, alpha 1	2197	I3L3H7:P02452	NP_000079.2	OI4	p.GLY356CYS
Core matrisome	Collagens	COL1A1	collagen, type I, alpha 1	2197	I3L3H7:P02452	NP_000079.2	OI2	p.GLY434VAL
Core matrisome	Collagens	COL1A1	collagen, type I, alpha 1	2197	I3L3H7:P02452	NP_000079.2	Osteogenesis imperfecta	p.GLY515ALA
Core matrisome	Collagens	COL1A1	collagen, type I, alpha 1	2197	I3L3H7:P02452	NP_000079.2	Osteogenesis imperfecta type III	p.GLY530CYS
Core matrisome	Collagens	COL1A1	collagen, type I, alpha 1	2197	I3L3H7:P02452	NP_000079.2	OI2	p.GLY533ASP
Core matrisome	Collagens	COL1A1	collagen, type I, alpha 1	2197	I3L3H7:P02452	NP_000079.2	OI2	p.GLY569ARG
Core matrisome	Collagens	COL1A1	collagen, type I, alpha 1	2197	I3L3H7:P02452	NP_000079.2	OI3	p.GLY593CYS
Core matrisome	Collagens	COL1A1	collagen, type I, alpha 1	2197	I3L3H7:P02452	NP_000079.2	Osteogenesis imperfecta III	p.GLY704CYS
Core matrisome	Collagens	COL1A1	collagen, type I, alpha 1	2197	I3L3H7:P02452	NP_000079.2	OI2	p.GLY719ASP
Core matrisome	Collagens	COL1A1	collagen, type I, alpha 1	2197	I3L3H7:P02452	NP_000079.2	OI2	p.GLY737ASP
Core matrisome	Collagens	COL1A1	collagen, type I, alpha 1	2197	I3L3H7:P02452	NP_000079.2	OI2	p.GLY743VAL
Core matrisome	Collagens	COL1A1	collagen, type I, alpha 1	2197	I3L3H7:P02452	NP_000079.2	OI2	p.GLY764VAL
Core matrisome	Collagens	COL1A1	collagen, type I, alpha 1	2197	I3L3H7:P02452	NP_000079.2	OI2	p.GLY815VAL
Core matrisome	Collagens	COL1A1	collagen, type I, alpha 1	2197	I3L3H7:P02452	NP_000079.2	OI2	p.GLY839SER
Core matrisome	Collagens	COL1A1	collagen, type I, alpha 1	2197	I3L3H7:P02452	NP_000079.2	OI2	p.GLY845ARG
Core matrisome	Collagens	COL1A1	collagen, type I, alpha 1	2197	I3L3H7:P02452	NP_000079.2	OI2	p.GLY851ASP
Core matrisome	Collagens	COL1A1	collagen, type I, alpha 1	2197	I3L3H7:P02452	NP_000079.2	OI2	p.GLY869CYS
Core matrisome	Collagens	COL1A1	collagen, type I, alpha 1	2197	I3L3H7:P02452	NP_000079.2	OI2	p.GLY896CYS
Core matrisome	Collagens	COL1A1	collagen, type I, alpha 1	2197	I3L3H7:P02452	NP_000079.2	OI2	p.GLY926CYS
Core matrisome	Collagens	COL1A1	collagen, type I, alpha 1	2197	I3L3H7:P02452	NP_000079.2	OI2	p.GLY980VAL
Core matrisome	Collagens	COL1A1	collagen, type I, alpha 1	2197	I3L3H7:P02452	NP_000079.2	Osteogenesis imperfecta III	p.LEU1464PRO
Core matrisome	Collagens	COL1A1	collagen, type I, alpha 1	2197	I3L3H7:P02452	NP_000079.2	Osteogenesis imperfecta	p.PRO412ARG
Core matrisome	Collagens	COL1A1	collagen, type I, alpha 1	2197	I3L3H7:P02452	NP_000079.2	Osteogenesis imperfecta	p.PRO978SER
Core matrisome	Collagens	COL1A1	collagen, type I, alpha 1	2197	I3L3H7:P02452	NP_000079.2	OI2	p.TRP1312CYS
Core matrisome	Collagens	COL1A1	collagen, type I, alpha 1	2197	I3L3H7:P02452	NP_000079.2	Caffey disease, 114000 (3)	NA
Core matrisome	Collagens	COL1A1	collagen, type I, alpha 1	2197	I3L3H7:P02452	NP_000079.2	Dissection of cervical arteries (3)	NA
Core matrisome	Collagens	COL1A1	collagen, type I, alpha 1	2197	I3L3H7:P02452	NP_000079.2	Ehlers-Danlos syndrome, type I, 130000 (3)	NA
Core matrisome	Collagens	COL1A1	collagen, type I, alpha 1	2197	I3L3H7:P02452	NP_000079.2	Ehlers-Danlos syndrome, type VII, 130060 (3)	NA
Core matrisome	Collagens	COL1A1	collagen, type I, alpha 1	2197	I3L3H7:P02452	NP_000079.2	Osteogenesis imperfecta, type I, 166200 (3)	NA
Core matrisome	Collagens	COL1A1	collagen, type I, alpha 1	2197	I3L3H7:P02452	NP_000079.2	Osteogenesis imperfecta, type II, 166210 (3)	NA
Core matrisome	Collagens	COL1A1	collagen, type I, alpha 1	2197	I3L3H7:P02452	NP_000079.2	Osteogenesis imperfecta, type III, 259420 (3)	NA
Core matrisome	Collagens	COL1A1	collagen, type I, alpha 1	2197	I3L3H7:P02452	NP_000079.2	Osteogenesis imperfecta, type IV, 166220 (3)	NA
Core matrisome	Collagens	COL1A1	collagen, type I, alpha 1	2197	I3L3H7:P02452	NP_000079.2	Osteoporosis, 166710 (3)	NA
Core matrisome	Collagens	COL1A1	collagen, type I, alpha 1	2197	I3L3H7:P02452	NP_000079.2	Caffey disease	NA
Core matrisome	Collagens	COL1A1	collagen, type I, alpha 1	2197	I3L3H7:P02452	NP_000079.2	Ehlers-Danlos syndrome, arthrochalasis type	NA
Core matrisome	Collagens	COL1A1	collagen, type I, alpha 1	2197	I3L3H7:P02452	NP_000079.2	Ehlers-Danlos syndrome, classic type	NA
Core matrisome	Collagens	COL1A1	collagen, type I, alpha 1	2197	I3L3H7:P02452	NP_000079.2	Ehlers-Danlos/osteogenesis imperfecta syndrome	NA
Core matrisome	Collagens	COL1A1	collagen, type I, alpha 1	2197	I3L3H7:P02452	NP_000079.2	high bone mass osteogenesis imperfecta	NA
Core matrisome	Collagens	COL1A1	collagen, type I, alpha 1	2197	I3L3H7:P02452	NP_000079.2	osteogenesis imperfecta type 1	NA
Core matrisome	Collagens	COL1A1	collagen, type I, alpha 1	2197	I3L3H7:P02452	NP_000079.2	osteogenesis imperfecta type 2	NA
Core matrisome	Collagens	COL1A1	collagen, type I, alpha 1	2197	I3L3H7:P02452	NP_000079.2	osteogenesis imperfecta type 3	NA
Core matrisome	Collagens	COL1A1	collagen, type I, alpha 1	2197	I3L3H7:P02452	NP_000079.2	osteogenesis imperfecta type 4	NA
Core matrisome	Collagens	COL1A2	collagen, type I, alpha 2	2198	P08123	NP_000080.2	Osteogenesis imperfecta	p.ALA1119PRO
Core matrisome	Collagens	COL1A2	collagen, type I, alpha 2	2198	P08123	NP_000080.2	Osteogenesis imperfecta	p.ARG432GLN
Core matrisome	Collagens	COL1A2	collagen, type I, alpha 2	2198	P08123	NP_000080.2	EHLERS-DANLOS SYNDROME, AUTOSOMAL RECESSIVE, CARDIAC VALVULAR FORM	p.GLU1201TER
Core matrisome	Collagens	COL1A2	collagen, type I, alpha 2	2198	P08123	NP_000080.2	Osteogenesis imperfecta type III	p.GLY1006ALA
Core matrisome	Collagens	COL1A2	collagen, type I, alpha 2	2198	P08123	NP_000080.2	OI3	p.GLY1012SER
Core matrisome	Collagens	COL1A2	collagen, type I, alpha 2	2198	P08123	NP_000080.2	Osteogenesis imperfecta III	p.GLY1090ASP
Core matrisome	Collagens	COL1A2	collagen, type I, alpha 2	2198	P08123	NP_000080.2	Osteogenesis imperfecta III	p.GLY1099ARG
Core matrisome	Collagens	COL1A2	collagen, type I, alpha 2	2198	P08123	NP_000080.2	Osteogenesis imperfecta	p.GLY226ASP
Core matrisome	Collagens	COL1A2	collagen, type I, alpha 2	2198	P08123	NP_000080.2	Osteogenesis imperfecta, recessive perinatal lethal	p.GLY259CYS
Core matrisome	Collagens	COL1A2	collagen, type I, alpha 2	2198	P08123	NP_000080.2	Osteogenesis imperfecta III	p.GLY367TRP
Core matrisome	Collagens	COL1A2	collagen, type I, alpha 2	2198	P08123	NP_000080.2	Osteogenesis imperfecta with normal sclerae, dominant form	p.GLY379ALA
Core matrisome	Collagens	COL1A2	collagen, type I, alpha 2	2198	P08123	NP_000080.2	Osteogenesis imperfecta, recessive perinatal lethal	p.GLY421ASP
Core matrisome	Collagens	COL1A2	collagen, type I, alpha 2	2198	P08123	NP_000080.2	Osteogenesis imperfecta, recessive perinatal lethal	p.GLY472CYS
Core matrisome	Collagens	COL1A2	collagen, type I, alpha 2	2198	P08123	NP_000080.2	Osteogenesis imperfecta, recessive perinatal lethal	p.GLY502SER
Core matrisome	Collagens	COL1A2	collagen, type I, alpha 2	2198	P08123	NP_000080.2	Osteogenesis imperfecta, recessive perinatal lethal	p.GLY547ASP
Core matrisome	Collagens	COL1A2	collagen, type I, alpha 2	2198	P08123	NP_000080.2	Osteogenesis imperfecta, recessive perinatal lethal	p.GLY580ASP
Core matrisome	Collagens	COL1A2	collagen, type I, alpha 2	2198	P08123	NP_000080.2	Osteogenesis imperfecta with normal sclerae, dominant form	p.GLY586VAL
Core matrisome	Collagens	COL1A2	collagen, type I, alpha 2	2198	P08123	NP_000080.2	Osteogenesis imperfecta	p.GLY625SER
Core matrisome	Collagens	COL1A2	collagen, type I, alpha 2	2198	P08123	NP_000080.2	Osteogenesis imperfecta with normal sclerae, dominant form	p.GLY646CYS
Core matrisome	Collagens	COL1A2	collagen, type I, alpha 2	2198	P08123	NP_000080.2	Osteoporosis	p.GLY661SER
Core matrisome	Collagens	COL1A2	collagen, type I, alpha 2	2198	P08123	NP_000080.2	Osteogenesis imperfecta, recessive perinatal lethal	p.GLY694ARG
Core matrisome	Collagens	COL1A2	collagen, type I, alpha 2	2198	P08123	NP_000080.2	OI4	p.GLY751SER
Core matrisome	Collagens	COL1A2	collagen, type I, alpha 2	2198	P08123	NP_000080.2	Osteogenesis imperfecta, recessive perinatal lethal	p.GLY805ASP
Core matrisome	Collagens	COL1A2	collagen, type I, alpha 2	2198	P08123	NP_000080.2	Osteogenesis imperfecta type III	p.GLY859SER
Core matrisome	Collagens	COL1A2	collagen, type I, alpha 2	2198	P08123	NP_000080.2	Osteogenesis imperfecta, recessive perinatal lethal	p.GLY865SER
Core matrisome	Collagens	COL1A2	collagen, type I, alpha 2	2198	P08123	NP_000080.2	Osteogenesis imperfecta, recessive perinatal lethal	p.GLY907ASP
Core matrisome	Collagens	COL1A2	collagen, type I, alpha 2	2198	P08123	NP_000080.2	Osteogenesis imperfecta	p.GLY943ARG
Core matrisome	Collagens	COL1A2	collagen, type I, alpha 2	2198	P08123	NP_000080.2	Osteogenesis imperfecta	p.PRO383HIS
Core matrisome	Collagens	COL1A2	collagen, type I, alpha 2	2198	P08123	NP_000080.2	Ehlers-Danlos syndrome, type VIIA2, 130060 (3)	NA
Core matrisome	Collagens	COL1A2	collagen, type I, alpha 2	2198	P08123	NP_000080.2	Marfan syndrome, atypical (3)	NA
Core matrisome	Collagens	COL1A2	collagen, type I, alpha 2	2198	P08123	NP_000080.2	Osteogenesis imperfecta, 3 clinical forms, 166200, 166210, 259420 (3)	NA
Core matrisome	Collagens	COL1A2	collagen, type I, alpha 2	2198	P08123	NP_000080.2	Osteoporosis, idiopathic, 166710 (3)	NA
Core matrisome	Collagens	COL1A2	collagen, type I, alpha 2	2198	P08123	NP_000080.2	ehlers-danlos syndrome, arthrochalasia type, 2	NA
Core matrisome	Collagens	COL1A2	collagen, type I, alpha 2	2198	P08123	NP_000080.2	Ehlers-Danlos syndrome, arthrochalasis type	NA
Core matrisome	Collagens	COL1A2	collagen, type I, alpha 2	2198	P08123	NP_000080.2	Ehlers-Danlos syndrome, cardiac valvular type	NA
Core matrisome	Collagens	COL1A2	collagen, type I, alpha 2	2198	P08123	NP_000080.2	Ehlers-Danlos/osteogenesis imperfecta syndrome	NA
Core matrisome	Collagens	COL1A2	collagen, type I, alpha 2	2198	P08123	NP_000080.2	high bone mass osteogenesis imperfecta	NA
Core matrisome	Collagens	COL1A2	collagen, type I, alpha 2	2198	P08123	NP_000080.2	osteogenesis imperfecta type 1	NA
Core matrisome	Collagens	COL1A2	collagen, type I, alpha 2	2198	P08123	NP_000080.2	osteogenesis imperfecta type 2	NA
Core matrisome	Collagens	COL1A2	collagen, type I, alpha 2	2198	P08123	NP_000080.2	osteogenesis imperfecta type 3	NA
Core matrisome	Collagens	COL1A2	collagen, type I, alpha 2	2198	P08123	NP_000080.2	osteogenesis imperfecta type 4	NA
Core matrisome	Collagens	COL25A1	collagen, type XXV, alpha 1	18603	A8MWQ5:D6R8Y2:E9PNV9:H0YAE1:Q9BXS0	NP_001243003.1:NP_115907.2:NP_942014.1	congenital ptosis (disease)	NA
Core matrisome	Collagens	COL25A1	collagen, type XXV, alpha 1	18603	A8MWQ5:D6R8Y2:E9PNV9:H0YAE1:Q9BXS0	NP_001243003.1:NP_115907.2:NP_942014.1	Duane retraction syndrome	NA
Core matrisome	Collagens	COL25A1	collagen, type XXV, alpha 1	18603	A8MWQ5:D6R8Y2:E9PNV9:H0YAE1:Q9BXS0	NP_001243003.1:NP_115907.2:NP_942014.1	fibrosis of extraocular muscles, congenital, 5	NA
Core matrisome	Collagens	COL27A1	collagen, type XXVII, alpha 1	22986	H0YD40:Q5T1U7:Q8IZC6	NP_116277.2	Steel syndrome	NA
Core matrisome	Collagens	COL2A1	collagen, type II, alpha 1	2200	P02458	NP_001835.3:NP_149162.2	Stickler syndrome	p.ARG209TER
Core matrisome	Collagens	COL2A1	collagen, type II, alpha 1	2200	P02458	NP_001835.3:NP_149162.2	Czech dysplasia	p.ARG275CYS
Core matrisome	Collagens	COL2A1	collagen, type II, alpha 1	2200	P02458	NP_001835.3:NP_149162.2	Stickler syndrome	p.ARG653TER
Core matrisome	Collagens	COL2A1	collagen, type II, alpha 1	2200	P02458	NP_001835.3:NP_149162.2	Osteoarthritis	p.ARG719CYS
Core matrisome	Collagens	COL2A1	collagen, type II, alpha 1	2200	P02458	NP_001835.3:NP_149162.2	Epiphyseal dysplasia, multiple, with myopia and conductive deafness	p.ARG904CYS
Core matrisome	Collagens	COL2A1	collagen, type II, alpha 1	2200	P02458	NP_001835.3:NP_149162.2	Stickler syndrome	p.ARG932TER
Core matrisome	Collagens	COL2A1	collagen, type II, alpha 1	2200	P02458	NP_001835.3:NP_149162.2	Spondyloepimetaphyseal dysplasia Strudwick type	p.ARG992GLY
Core matrisome	Collagens	COL2A1	collagen, type II, alpha 1	2200	P02458	NP_001835.3:NP_149162.2	AVASCULAR NECROSIS OF THE FEMORAL HEAD, PRIMARY	p.GLY1170SER
Core matrisome	Collagens	COL2A1	collagen, type II, alpha 1	2200	P02458	NP_001835.3:NP_149162.2	Stickler syndrome	p.GLY267ASP
Core matrisome	Collagens	COL2A1	collagen, type II, alpha 1	2200	P02458	NP_001835.3:NP_149162.2	Rhegmatogenous retinal detachment	p.GLY318ARG
Core matrisome	Collagens	COL2A1	collagen, type II, alpha 1	2200	P02458	NP_001835.3:NP_149162.2	Osteochondrodysplasia	p.GLY354ARG
Core matrisome	Collagens	COL2A1	collagen, type II, alpha 1	2200	P02458	NP_001835.3:NP_149162.2	Achondrogenesis type 2	p.GLY477VAL
Core matrisome	Collagens	COL2A1	collagen, type II, alpha 1	2200	P02458	NP_001835.3:NP_149162.2	Spondyloepimetaphyseal dysplasia Strudwick type	p.GLY492VAL
Core matrisome	Collagens	COL2A1	collagen, type II, alpha 1	2200	P02458	NP_001835.3:NP_149162.2	Spondyloepimetaphyseal dysplasia Strudwick type	p.GLY504CYS
Core matrisome	Collagens	COL2A1	collagen, type II, alpha 1	2200	P02458	NP_001835.3:NP_149162.2	Achondrogenesis type 2	p.GLY516ASP
Core matrisome	Collagens	COL2A1	collagen, type II, alpha 1	2200	P02458	NP_001835.3:NP_149162.2	AVASCULAR NECROSIS OF THE FEMORAL HEAD, PRIMARY	p.GLY717SER
Core matrisome	Collagens	COL2A1	collagen, type II, alpha 1	2200	P02458	NP_001835.3:NP_149162.2	Spondyloepimetaphyseal dysplasia Strudwick type	p.GLY909CYS
Core matrisome	Collagens	COL2A1	collagen, type II, alpha 1	2200	P02458	NP_001835.3:NP_149162.2	DRRD	p.LEU667PHE
Core matrisome	Collagens	COL2A1	collagen, type II, alpha 1	2200	P02458	NP_001835.3:NP_149162.2	Spondyloepiphyseal dysplasia congenita	p.THR1370MET
Core matrisome	Collagens	COL2A1	collagen, type II, alpha 1	2200	P02458	NP_001835.3:NP_149162.2	Platyspondylic lethal skeletal dysplasia Torrance type	p.TYR1391CYS
Core matrisome	Collagens	COL2A1	collagen, type II, alpha 1	2200	P02458	NP_001835.3:NP_149162.2	Achondrogenesis-hypochondrogenesis, type II, 200610 (3)	NA
Core matrisome	Collagens	COL2A1	collagen, type II, alpha 1	2200	P02458	NP_001835.3:NP_149162.2	Kniest dysplasia, 156550 (3)	NA
Core matrisome	Collagens	COL2A1	collagen, type II, alpha 1	2200	P02458	NP_001835.3:NP_149162.2	Osteoarthrosis, 165720 (3)	NA
Core matrisome	Collagens	COL2A1	collagen, type II, alpha 1	2200	P02458	NP_001835.3:NP_149162.2	SMED Strudwick type, 184250 (3)	NA
Core matrisome	Collagens	COL2A1	collagen, type II, alpha 1	2200	P02458	NP_001835.3:NP_149162.2	Stickler syndrome, type I, 108300 (3)	NA
Core matrisome	Collagens	COL2A1	collagen, type II, alpha 1	2200	P02458	NP_001835.3:NP_149162.2	Wagner syndrome, 143200 (3)	NA
Core matrisome	Collagens	COL2A1	collagen, type II, alpha 1	2200	P02458	NP_001835.3:NP_149162.2	achondrogenesis type II	NA
Core matrisome	Collagens	COL2A1	collagen, type II, alpha 1	2200	P02458	NP_001835.3:NP_149162.2	autosomal dominant rhegmatogenous retinal detachment	NA
Core matrisome	Collagens	COL2A1	collagen, type II, alpha 1	2200	P02458	NP_001835.3:NP_149162.2	avascular necrosis of femoral head, primary, 1	NA
Core matrisome	Collagens	COL2A1	collagen, type II, alpha 1	2200	P02458	NP_001835.3:NP_149162.2	Czech dysplasia, metatarsal type	NA
Core matrisome	Collagens	COL2A1	collagen, type II, alpha 1	2200	P02458	NP_001835.3:NP_149162.2	dysspondyloenchondromatosis	NA
Core matrisome	Collagens	COL2A1	collagen, type II, alpha 1	2200	P02458	NP_001835.3:NP_149162.2	familial avascular necrosis of femoral head	NA
Core matrisome	Collagens	COL2A1	collagen, type II, alpha 1	2200	P02458	NP_001835.3:NP_149162.2	hypochondrogenesis	NA
Core matrisome	Collagens	COL2A1	collagen, type II, alpha 1	2200	P02458	NP_001835.3:NP_149162.2	Kniest dysplasia	NA
Core matrisome	Collagens	COL2A1	collagen, type II, alpha 1	2200	P02458	NP_001835.3:NP_149162.2	Legg-Calve-Perthes disease	NA
Core matrisome	Collagens	COL2A1	collagen, type II, alpha 1	2200	P02458	NP_001835.3:NP_149162.2	mild spondyloepiphyseal dysplasia due to COL2A1 mutation with early-onset osteoarthritis	NA
Core matrisome	Collagens	COL2A1	collagen, type II, alpha 1	2200	P02458	NP_001835.3:NP_149162.2	multiple epiphyseal dysplasia, Beighton type	NA
Core matrisome	Collagens	COL2A1	collagen, type II, alpha 1	2200	P02458	NP_001835.3:NP_149162.2	platyspondylic dysplasia, Torrance type	NA
Core matrisome	Collagens	COL2A1	collagen, type II, alpha 1	2200	P02458	NP_001835.3:NP_149162.2	spondyloepimetaphyseal dysplasia, Strudwick type	NA
Core matrisome	Collagens	COL2A1	collagen, type II, alpha 1	2200	P02458	NP_001835.3:NP_149162.2	spondyloepiphyseal dysplasia congenita	NA
Core matrisome	Collagens	COL2A1	collagen, type II, alpha 1	2200	P02458	NP_001835.3:NP_149162.2	spondyloepiphyseal dysplasia, Stanescu type	NA
Core matrisome	Collagens	COL2A1	collagen, type II, alpha 1	2200	P02458	NP_001835.3:NP_149162.2	spondylometaphyseal dysplasia, Schmidt type	NA
Core matrisome	Collagens	COL2A1	collagen, type II, alpha 1	2200	P02458	NP_001835.3:NP_149162.2	spondyloperipheral dysplasia-short ulna syndrome	NA
Core matrisome	Collagens	COL2A1	collagen, type II, alpha 1	2200	P02458	NP_001835.3:NP_149162.2	Stickler syndrome type 1	NA
Core matrisome	Collagens	COL2A1	collagen, type II, alpha 1	2200	P02458	NP_001835.3:NP_149162.2	Stickler syndrome, type I, nonsyndromic ocular	NA
Core matrisome	Collagens	COL3A1	collagen, type III, alpha 1	2201	E7ENY8:H7C435:P02461	NP_000081.1	EDS4	p.GLY1014GLU
Core matrisome	Collagens	COL3A1	collagen, type III, alpha 1	2201	E7ENY8:H7C435:P02461	NP_000081.1	EDS4	p.GLY1077VAL
Core matrisome	Collagens	COL3A1	collagen, type III, alpha 1	2201	E7ENY8:H7C435:P02461	NP_000081.1	EDS4	p.GLY1101GLU
Core matrisome	Collagens	COL3A1	collagen, type III, alpha 1	2201	E7ENY8:H7C435:P02461	NP_000081.1	EDS4	p.GLY1173GLU
Core matrisome	Collagens	COL3A1	collagen, type III, alpha 1	2201	E7ENY8:H7C435:P02461	NP_000081.1	EDS4	p.GLY1185ASP
Core matrisome	Collagens	COL3A1	collagen, type III, alpha 1	2201	E7ENY8:H7C435:P02461	NP_000081.1	EDS4	p.GLY1188GLU
Core matrisome	Collagens	COL3A1	collagen, type III, alpha 1	2201	E7ENY8:H7C435:P02461	NP_000081.1	EDS4	p.GLY183SER
Core matrisome	Collagens	COL3A1	collagen, type III, alpha 1	2201	E7ENY8:H7C435:P02461	NP_000081.1	EDS4	p.GLY249ASP
Core matrisome	Collagens	COL3A1	collagen, type III, alpha 1	2201	E7ENY8:H7C435:P02461	NP_000081.1	Aortic aneurysm	p.GLY303ARG
Core matrisome	Collagens	COL3A1	collagen, type III, alpha 1	2201	E7ENY8:H7C435:P02461	NP_000081.1	EDS4	p.GLY552GLU
Core matrisome	Collagens	COL3A1	collagen, type III, alpha 1	2201	E7ENY8:H7C435:P02461	NP_000081.1	EDS4	p.GLY582SER
Core matrisome	Collagens	COL3A1	collagen, type III, alpha 1	2201	E7ENY8:H7C435:P02461	NP_000081.1	EDS4	p.GLY666ASP
Core matrisome	Collagens	COL3A1	collagen, type III, alpha 1	2201	E7ENY8:H7C435:P02461	NP_000081.1	EDS4	p.GLY738SER
Core matrisome	Collagens	COL3A1	collagen, type III, alpha 1	2201	E7ENY8:H7C435:P02461	NP_000081.1	Aortic aneurysm	p.GLY786ARG
Core matrisome	Collagens	COL3A1	collagen, type III, alpha 1	2201	E7ENY8:H7C435:P02461	NP_000081.1	EDS3	p.GLY804SER
Core matrisome	Collagens	COL3A1	collagen, type III, alpha 1	2201	E7ENY8:H7C435:P02461	NP_000081.1	EDS4	p.GLY957SER
Core matrisome	Collagens	COL3A1	collagen, type III, alpha 1	2201	E7ENY8:H7C435:P02461	NP_000081.1	EDS4	p.GLY960VAL
Core matrisome	Collagens	COL3A1	collagen, type III, alpha 1	2201	E7ENY8:H7C435:P02461	NP_000081.1	Ehlers-Danlos syndrome, type III, 130020 (3)	NA
Core matrisome	Collagens	COL3A1	collagen, type III, alpha 1	2201	E7ENY8:H7C435:P02461	NP_000081.1	Ehlers-Danlos syndrome, type IV, 130050 (3)	NA
Core matrisome	Collagens	COL3A1	collagen, type III, alpha 1	2201	E7ENY8:H7C435:P02461	NP_000081.1	Aneurysm, familial arterial (3)	NA
Core matrisome	Collagens	COL3A1	collagen, type III, alpha 1	2201	E7ENY8:H7C435:P02461	NP_000081.1	acrogeria	NA
Core matrisome	Collagens	COL3A1	collagen, type III, alpha 1	2201	E7ENY8:H7C435:P02461	NP_000081.1	autosomal dominant Ehlers-Danlos syndrome, vascular type	NA
Core matrisome	Collagens	COL3A1	collagen, type III, alpha 1	2201	E7ENY8:H7C435:P02461	NP_000081.1	Ehlers-Danlos syndrome, vascular type	NA
Core matrisome	Collagens	COL4A1	collagen, type IV, alpha 1	2202	F5H5K0:P02462	NP_001836.2	ANGIOPATHY, HEREDITARY, WITH NEPHROPATHY, ANEURYSMS, AND MUSCLE CRAMPS	p.GLY498ARG
Core matrisome	Collagens	COL4A1	collagen, type IV, alpha 1	2202	F5H5K0:P02462	NP_001836.2	ANGIOPATHY, HEREDITARY, WITH NEPHROPATHY, ANEURYSMS, AND MUSCLE CRAMPS	p.GLY498VAL
Core matrisome	Collagens	COL4A1	collagen, type IV, alpha 1	2202	F5H5K0:P02462	NP_001836.2	ANGIOPATHY, HEREDITARY, WITH NEPHROPATHY, ANEURYSMS, AND MUSCLE CRAMPS	p.GLY510ARG
Core matrisome	Collagens	COL4A1	collagen, type IV, alpha 1	2202	F5H5K0:P02462	NP_001836.2	ANGIOPATHY, HEREDITARY, WITH NEPHROPATHY, ANEURYSMS, AND MUSCLE CRAMPS	p.GLY519ARG
Core matrisome	Collagens	COL4A1	collagen, type IV, alpha 1	2202	F5H5K0:P02462	NP_001836.2	ANGIOPATHY, HEREDITARY, WITH NEPHROPATHY, ANEURYSMS, AND MUSCLE CRAMPS	p.GLY528GLU
Core matrisome	Collagens	COL4A1	collagen, type IV, alpha 1	2202	F5H5K0:P02462	NP_001836.2	Brain small vessel disease with hemorrhage	p.GLY590GLU
Core matrisome	Collagens	COL4A1	collagen, type IV, alpha 1	2202	F5H5K0:P02462	NP_001836.2	Axenfeld-Rieger anomaly	p.GLY720ASP
Core matrisome	Collagens	COL4A1	collagen, type IV, alpha 1	2202	F5H5K0:P02462	NP_001836.2	Familial porencephaly	p.MET1LEU
Core matrisome	Collagens	COL4A1	collagen, type IV, alpha 1	2202	F5H5K0:P02462	NP_001836.2	Porencephaly, 175780 (3)	NA
Core matrisome	Collagens	COL4A1	collagen, type IV, alpha 1	2202	F5H5K0:P02462	NP_001836.2	autosomal dominant familial hematuria-retinal arteriolar tortuosity-contractures syndrome	NA
Core matrisome	Collagens	COL4A1	collagen, type IV, alpha 1	2202	F5H5K0:P02462	NP_001836.2	COL4A1-related familial vascular leukoencephalopathy	NA
Core matrisome	Collagens	COL4A1	collagen, type IV, alpha 1	2202	F5H5K0:P02462	NP_001836.2	familial porencephaly	NA
Core matrisome	Collagens	COL4A1	collagen, type IV, alpha 1	2202	F5H5K0:P02462	NP_001836.2	familial schizencephaly	NA
Core matrisome	Collagens	COL4A1	collagen, type IV, alpha 1	2202	F5H5K0:P02462	NP_001836.2	pontine autosomal dominant microangiopathy with leukoencephalopathy	NA
Core matrisome	Collagens	COL4A1	collagen, type IV, alpha 1	2202	F5H5K0:P02462	NP_001836.2	porencephaly 1	NA
Core matrisome	Collagens	COL4A1	collagen, type IV, alpha 1	2202	F5H5K0:P02462	NP_001836.2	retinal arterial tortuosity (disease)	NA
Core matrisome	Collagens	COL4A1	collagen, type IV, alpha 1	2202	F5H5K0:P02462	NP_001836.2	Walker-Warburg syndrome	NA
Core matrisome	Collagens	COL4A2	collagen, type IV, alpha 2	2203	A2A352:P08572	NP_001837.2	familial porencephaly	NA
Core matrisome	Collagens	COL4A2	collagen, type IV, alpha 2	2203	A2A352:P08572	NP_001837.2	porencephaly 2	NA
Core matrisome	Collagens	COL4A3	collagen, type IV, alpha 3 (Goodpasture antigen)	2204	H7BXM4:Q01955	NP_000082.2	Alport syndrome	p.ARG1481TER
Core matrisome	Collagens	COL4A3	collagen, type IV, alpha 3 (Goodpasture antigen)	2204	H7BXM4:Q01955	NP_000082.2	Alport syndrome	p.GLY1167ARG
Core matrisome	Collagens	COL4A3	collagen, type IV, alpha 3 (Goodpasture antigen)	2204	H7BXM4:Q01955	NP_000082.2	Alport syndrome	p.SER1524TER
Core matrisome	Collagens	COL4A3	collagen, type IV, alpha 3 (Goodpasture antigen)	2204	H7BXM4:Q01955	NP_000082.2	Alport syndrome, autosomal recessive, 203780 (3)	NA
Core matrisome	Collagens	COL4A3	collagen, type IV, alpha 3 (Goodpasture antigen)	2204	H7BXM4:Q01955	NP_000082.2	autosomal dominant Alport syndrome	NA
Core matrisome	Collagens	COL4A3	collagen, type IV, alpha 3 (Goodpasture antigen)	2204	H7BXM4:Q01955	NP_000082.2	autosomal recessive Alport syndrome	NA
Core matrisome	Collagens	COL4A3	collagen, type IV, alpha 3 (Goodpasture antigen)	2204	H7BXM4:Q01955	NP_000082.2	hematuria, benign familial	NA
Core matrisome	Collagens	COL4A4	collagen, type IV, alpha 4	2206	J3KNM7:P53420	NP_000083.3:XP_005246338.1	Alport syndrome	p.ARG1377TER
Core matrisome	Collagens	COL4A4	collagen, type IV, alpha 4	2206	J3KNM7:P53420	NP_000083.3:XP_005246338.1	Alport syndrome	p.CYS1641TER
Core matrisome	Collagens	COL4A4	collagen, type IV, alpha 4	2206	J3KNM7:P53420	NP_000083.3:XP_005246338.1	Alport syndrome	p.GLY1201SER
Core matrisome	Collagens	COL4A4	collagen, type IV, alpha 4	2206	J3KNM7:P53420	NP_000083.3:XP_005246338.1	Alport syndrome	p.PRO1572LEU
Core matrisome	Collagens	COL4A4	collagen, type IV, alpha 4	2206	J3KNM7:P53420	NP_000083.3:XP_005246338.1	Alport syndrome	p.SER1238TER
Core matrisome	Collagens	COL4A4	collagen, type IV, alpha 4	2206	J3KNM7:P53420	NP_000083.3:XP_005246338.1	Alport syndrome, autosomal recessive, 203780 (3)	NA
Core matrisome	Collagens	COL4A4	collagen, type IV, alpha 4	2206	J3KNM7:P53420	NP_000083.3:XP_005246338.1	Hematuria, familial benign (3)	NA
Core matrisome	Collagens	COL4A4	collagen, type IV, alpha 4	2206	J3KNM7:P53420	NP_000083.3:XP_005246338.1	autosomal dominant Alport syndrome	NA
Core matrisome	Collagens	COL4A4	collagen, type IV, alpha 4	2206	J3KNM7:P53420	NP_000083.3:XP_005246338.1	autosomal recessive Alport syndrome	NA
Core matrisome	Collagens	COL4A4	collagen, type IV, alpha 4	2206	J3KNM7:P53420	NP_000083.3:XP_005246338.1	hematuria, benign familial	NA
Core matrisome	Collagens	COL4A5	collagen, type IV, alpha 5	2207	H0Y998:H0Y9H0:H0Y9R8:P29400	NP_000486.1:NP_203699.1:XP_006724679.1	Alport syndrome	p.ALA1498ASP
Core matrisome	Collagens	COL4A5	collagen, type IV, alpha 5	2207	H0Y998:H0Y9H0:H0Y9R8:P29400	NP_000486.1:NP_203699.1:XP_006724679.1	Alport syndrome	p.ARG1410CYS
Core matrisome	Collagens	COL4A5	collagen, type IV, alpha 5	2207	H0Y998:H0Y9H0:H0Y9R8:P29400	NP_000486.1:NP_203699.1:XP_006724679.1	Alport syndrome	p.ARG1422CYS
Core matrisome	Collagens	COL4A5	collagen, type IV, alpha 5	2207	H0Y998:H0Y9H0:H0Y9R8:P29400	NP_000486.1:NP_203699.1:XP_006724679.1	Alport syndrome	p.ARG1563TER
Core matrisome	Collagens	COL4A5	collagen, type IV, alpha 5	2207	H0Y998:H0Y9H0:H0Y9R8:P29400	NP_000486.1:NP_203699.1:XP_006724679.1	Alport syndrome	p.ARG1677GLN
Core matrisome	Collagens	COL4A5	collagen, type IV, alpha 5	2207	H0Y998:H0Y9H0:H0Y9R8:P29400	NP_000486.1:NP_203699.1:XP_006724679.1	Alport syndrome	p.ARG1677TER
Core matrisome	Collagens	COL4A5	collagen, type IV, alpha 5	2207	H0Y998:H0Y9H0:H0Y9R8:P29400	NP_000486.1:NP_203699.1:XP_006724679.1	Alport syndrome	p.ARG266TER
Core matrisome	Collagens	COL4A5	collagen, type IV, alpha 5	2207	H0Y998:H0Y9H0:H0Y9R8:P29400	NP_000486.1:NP_203699.1:XP_006724679.1	Alport syndrome	p.ARG373TER
Core matrisome	Collagens	COL4A5	collagen, type IV, alpha 5	2207	H0Y998:H0Y9H0:H0Y9R8:P29400	NP_000486.1:NP_203699.1:XP_006724679.1	Alport syndrome	p.CYS1521TER
Core matrisome	Collagens	COL4A5	collagen, type IV, alpha 5	2207	H0Y998:H0Y9H0:H0Y9R8:P29400	NP_000486.1:NP_203699.1:XP_006724679.1	Alport syndrome	p.CYS1567ARG
Core matrisome	Collagens	COL4A5	collagen, type IV, alpha 5	2207	H0Y998:H0Y9H0:H0Y9R8:P29400	NP_000486.1:NP_203699.1:XP_006724679.1	Alport syndrome	p.CYS1586ARG
Core matrisome	Collagens	COL4A5	collagen, type IV, alpha 5	2207	H0Y998:H0Y9H0:H0Y9R8:P29400	NP_000486.1:NP_203699.1:XP_006724679.1	Alport syndrome	p.CYS1586PHE
Core matrisome	Collagens	COL4A5	collagen, type IV, alpha 5	2207	H0Y998:H0Y9H0:H0Y9R8:P29400	NP_000486.1:NP_203699.1:XP_006724679.1	Alport syndrome	p.CYS1638TYR
Core matrisome	Collagens	COL4A5	collagen, type IV, alpha 5	2207	H0Y998:H0Y9H0:H0Y9R8:P29400	NP_000486.1:NP_203699.1:XP_006724679.1	Alport syndrome	p.CYS1678TRP
Core matrisome	Collagens	COL4A5	collagen, type IV, alpha 5	2207	H0Y998:H0Y9H0:H0Y9R8:P29400	NP_000486.1:NP_203699.1:XP_006724679.1	Alport syndrome	p.CYS29TER
Core matrisome	Collagens	COL4A5	collagen, type IV, alpha 5	2207	H0Y998:H0Y9H0:H0Y9R8:P29400	NP_000486.1:NP_203699.1:XP_006724679.1	Alport syndrome	p.GLN1016TER
Core matrisome	Collagens	COL4A5	collagen, type IV, alpha 5	2207	H0Y998:H0Y9H0:H0Y9R8:P29400	NP_000486.1:NP_203699.1:XP_006724679.1	Alport syndrome	p.GLN1061TER
Core matrisome	Collagens	COL4A5	collagen, type IV, alpha 5	2207	H0Y998:H0Y9H0:H0Y9R8:P29400	NP_000486.1:NP_203699.1:XP_006724679.1	Alport syndrome	p.GLN1180TER
Core matrisome	Collagens	COL4A5	collagen, type IV, alpha 5	2207	H0Y998:H0Y9H0:H0Y9R8:P29400	NP_000486.1:NP_203699.1:XP_006724679.1	Alport syndrome	p.GLN1393TER
Core matrisome	Collagens	COL4A5	collagen, type IV, alpha 5	2207	H0Y998:H0Y9H0:H0Y9R8:P29400	NP_000486.1:NP_203699.1:XP_006724679.1	Alport syndrome	p.GLN930TER
Core matrisome	Collagens	COL4A5	collagen, type IV, alpha 5	2207	H0Y998:H0Y9H0:H0Y9R8:P29400	NP_000486.1:NP_203699.1:XP_006724679.1	Alport syndrome	p.GLU130TER
Core matrisome	Collagens	COL4A5	collagen, type IV, alpha 5	2207	H0Y998:H0Y9H0:H0Y9R8:P29400	NP_000486.1:NP_203699.1:XP_006724679.1	Alport syndrome	p.GLU287TER
Core matrisome	Collagens	COL4A5	collagen, type IV, alpha 5	2207	H0Y998:H0Y9H0:H0Y9R8:P29400	NP_000486.1:NP_203699.1:XP_006724679.1	Alport syndrome	p.GLU305TER
Core matrisome	Collagens	COL4A5	collagen, type IV, alpha 5	2207	H0Y998:H0Y9H0:H0Y9R8:P29400	NP_000486.1:NP_203699.1:XP_006724679.1	Alport syndrome	p.GLU633LYS
Core matrisome	Collagens	COL4A5	collagen, type IV, alpha 5	2207	H0Y998:H0Y9H0:H0Y9R8:P29400	NP_000486.1:NP_203699.1:XP_006724679.1	Alport syndrome	p.GLU700TER
Core matrisome	Collagens	COL4A5	collagen, type IV, alpha 5	2207	H0Y998:H0Y9H0:H0Y9R8:P29400	NP_000486.1:NP_203699.1:XP_006724679.1	Alport syndrome	p.GLY1006VAL
Core matrisome	Collagens	COL4A5	collagen, type IV, alpha 5	2207	H0Y998:H0Y9H0:H0Y9R8:P29400	NP_000486.1:NP_203699.1:XP_006724679.1	Alport syndrome	p.GLY1015VAL
Core matrisome	Collagens	COL4A5	collagen, type IV, alpha 5	2207	H0Y998:H0Y9H0:H0Y9R8:P29400	NP_000486.1:NP_203699.1:XP_006724679.1	Alport syndrome	p.GLY1027VAL
Core matrisome	Collagens	COL4A5	collagen, type IV, alpha 5	2207	H0Y998:H0Y9H0:H0Y9R8:P29400	NP_000486.1:NP_203699.1:XP_006724679.1	Alport syndrome	p.GLY1030SER
Core matrisome	Collagens	COL4A5	collagen, type IV, alpha 5	2207	H0Y998:H0Y9H0:H0Y9R8:P29400	NP_000486.1:NP_203699.1:XP_006724679.1	Alport syndrome	p.GLY1036VAL
Core matrisome	Collagens	COL4A5	collagen, type IV, alpha 5	2207	H0Y998:H0Y9H0:H0Y9R8:P29400	NP_000486.1:NP_203699.1:XP_006724679.1	Alport syndrome	p.GLY1039SER
Core matrisome	Collagens	COL4A5	collagen, type IV, alpha 5	2207	H0Y998:H0Y9H0:H0Y9R8:P29400	NP_000486.1:NP_203699.1:XP_006724679.1	Alport syndrome	p.GLY1045GLU
Core matrisome	Collagens	COL4A5	collagen, type IV, alpha 5	2207	H0Y998:H0Y9H0:H0Y9R8:P29400	NP_000486.1:NP_203699.1:XP_006724679.1	Alport syndrome	p.GLY1057TER
Core matrisome	Collagens	COL4A5	collagen, type IV, alpha 5	2207	H0Y998:H0Y9H0:H0Y9R8:P29400	NP_000486.1:NP_203699.1:XP_006724679.1	Alport syndrome	p.GLY1060TER
Core matrisome	Collagens	COL4A5	collagen, type IV, alpha 5	2207	H0Y998:H0Y9H0:H0Y9R8:P29400	NP_000486.1:NP_203699.1:XP_006724679.1	Alport syndrome	p.GLY1063VAL
Core matrisome	Collagens	COL4A5	collagen, type IV, alpha 5	2207	H0Y998:H0Y9H0:H0Y9R8:P29400	NP_000486.1:NP_203699.1:XP_006724679.1	Alport syndrome	p.GLY1066ALA
Core matrisome	Collagens	COL4A5	collagen, type IV, alpha 5	2207	H0Y998:H0Y9H0:H0Y9R8:P29400	NP_000486.1:NP_203699.1:XP_006724679.1	Alport syndrome	p.GLY1066SER
Core matrisome	Collagens	COL4A5	collagen, type IV, alpha 5	2207	H0Y998:H0Y9H0:H0Y9R8:P29400	NP_000486.1:NP_203699.1:XP_006724679.1	Alport syndrome	p.GLY1083SER
Core matrisome	Collagens	COL4A5	collagen, type IV, alpha 5	2207	H0Y998:H0Y9H0:H0Y9R8:P29400	NP_000486.1:NP_203699.1:XP_006724679.1	Alport syndrome	p.GLY1086ARG
Core matrisome	Collagens	COL4A5	collagen, type IV, alpha 5	2207	H0Y998:H0Y9H0:H0Y9R8:P29400	NP_000486.1:NP_203699.1:XP_006724679.1	Alport syndrome	p.GLY1086ASP
Core matrisome	Collagens	COL4A5	collagen, type IV, alpha 5	2207	H0Y998:H0Y9H0:H0Y9R8:P29400	NP_000486.1:NP_203699.1:XP_006724679.1	Alport syndrome	p.GLY1104VAL
Core matrisome	Collagens	COL4A5	collagen, type IV, alpha 5	2207	H0Y998:H0Y9H0:H0Y9R8:P29400	NP_000486.1:NP_203699.1:XP_006724679.1	Alport syndrome	p.GLY1107ARG
Core matrisome	Collagens	COL4A5	collagen, type IV, alpha 5	2207	H0Y998:H0Y9H0:H0Y9R8:P29400	NP_000486.1:NP_203699.1:XP_006724679.1	Alport syndrome	p.GLY1143ASP
Core matrisome	Collagens	COL4A5	collagen, type IV, alpha 5	2207	H0Y998:H0Y9H0:H0Y9R8:P29400	NP_000486.1:NP_203699.1:XP_006724679.1	Alport syndrome	p.GLY1143SER
Core matrisome	Collagens	COL4A5	collagen, type IV, alpha 5	2207	H0Y998:H0Y9H0:H0Y9R8:P29400	NP_000486.1:NP_203699.1:XP_006724679.1	Alport syndrome	p.GLY1161ARG
Core matrisome	Collagens	COL4A5	collagen, type IV, alpha 5	2207	H0Y998:H0Y9H0:H0Y9R8:P29400	NP_000486.1:NP_203699.1:XP_006724679.1	Alport syndrome	p.GLY1167SER
Core matrisome	Collagens	COL4A5	collagen, type IV, alpha 5	2207	H0Y998:H0Y9H0:H0Y9R8:P29400	NP_000486.1:NP_203699.1:XP_006724679.1	Alport syndrome	p.GLY1170SER
Core matrisome	Collagens	COL4A5	collagen, type IV, alpha 5	2207	H0Y998:H0Y9H0:H0Y9R8:P29400	NP_000486.1:NP_203699.1:XP_006724679.1	Alport syndrome	p.GLY1179ARG
Core matrisome	Collagens	COL4A5	collagen, type IV, alpha 5	2207	H0Y998:H0Y9H0:H0Y9R8:P29400	NP_000486.1:NP_203699.1:XP_006724679.1	Alport syndrome	p.GLY1182ARG
Core matrisome	Collagens	COL4A5	collagen, type IV, alpha 5	2207	H0Y998:H0Y9H0:H0Y9R8:P29400	NP_000486.1:NP_203699.1:XP_006724679.1	Alport syndrome	p.GLY1196ARG
Core matrisome	Collagens	COL4A5	collagen, type IV, alpha 5	2207	H0Y998:H0Y9H0:H0Y9R8:P29400	NP_000486.1:NP_203699.1:XP_006724679.1	Alport syndrome	p.GLY1205SER
Core matrisome	Collagens	COL4A5	collagen, type IV, alpha 5	2207	H0Y998:H0Y9H0:H0Y9R8:P29400	NP_000486.1:NP_203699.1:XP_006724679.1	Alport syndrome	p.GLY1211ARG
Core matrisome	Collagens	COL4A5	collagen, type IV, alpha 5	2207	H0Y998:H0Y9H0:H0Y9R8:P29400	NP_000486.1:NP_203699.1:XP_006724679.1	Alport syndrome	p.GLY1211GLU
Core matrisome	Collagens	COL4A5	collagen, type IV, alpha 5	2207	H0Y998:H0Y9H0:H0Y9R8:P29400	NP_000486.1:NP_203699.1:XP_006724679.1	Alport syndrome	p.GLY1214GLU
Core matrisome	Collagens	COL4A5	collagen, type IV, alpha 5	2207	H0Y998:H0Y9H0:H0Y9R8:P29400	NP_000486.1:NP_203699.1:XP_006724679.1	Alport syndrome	p.GLY1220ASP
Core matrisome	Collagens	COL4A5	collagen, type IV, alpha 5	2207	H0Y998:H0Y9H0:H0Y9R8:P29400	NP_000486.1:NP_203699.1:XP_006724679.1	Alport syndrome	p.GLY1223VAL
Core matrisome	Collagens	COL4A5	collagen, type IV, alpha 5	2207	H0Y998:H0Y9H0:H0Y9R8:P29400	NP_000486.1:NP_203699.1:XP_006724679.1	Alport syndrome	p.GLY1229ASP
Core matrisome	Collagens	COL4A5	collagen, type IV, alpha 5	2207	H0Y998:H0Y9H0:H0Y9R8:P29400	NP_000486.1:NP_203699.1:XP_006724679.1	Alport syndrome	p.GLY1232SER
Core matrisome	Collagens	COL4A5	collagen, type IV, alpha 5	2207	H0Y998:H0Y9H0:H0Y9R8:P29400	NP_000486.1:NP_203699.1:XP_006724679.1	Alport syndrome	p.GLY1241CYS
Core matrisome	Collagens	COL4A5	collagen, type IV, alpha 5	2207	H0Y998:H0Y9H0:H0Y9R8:P29400	NP_000486.1:NP_203699.1:XP_006724679.1	Alport syndrome	p.GLY1244ASP
Core matrisome	Collagens	COL4A5	collagen, type IV, alpha 5	2207	H0Y998:H0Y9H0:H0Y9R8:P29400	NP_000486.1:NP_203699.1:XP_006724679.1	Alport syndrome	p.GLY1252SER
Core matrisome	Collagens	COL4A5	collagen, type IV, alpha 5	2207	H0Y998:H0Y9H0:H0Y9R8:P29400	NP_000486.1:NP_203699.1:XP_006724679.1	Alport syndrome	p.GLY1255ARG
Core matrisome	Collagens	COL4A5	collagen, type IV, alpha 5	2207	H0Y998:H0Y9H0:H0Y9R8:P29400	NP_000486.1:NP_203699.1:XP_006724679.1	Alport syndrome	p.GLY1261GLU
Core matrisome	Collagens	COL4A5	collagen, type IV, alpha 5	2207	H0Y998:H0Y9H0:H0Y9R8:P29400	NP_000486.1:NP_203699.1:XP_006724679.1	Alport syndrome	p.GLY1270SER
Core matrisome	Collagens	COL4A5	collagen, type IV, alpha 5	2207	H0Y998:H0Y9H0:H0Y9R8:P29400	NP_000486.1:NP_203699.1:XP_006724679.1	Alport syndrome	p.GLY1333SER
Core matrisome	Collagens	COL4A5	collagen, type IV, alpha 5	2207	H0Y998:H0Y9H0:H0Y9R8:P29400	NP_000486.1:NP_203699.1:XP_006724679.1	Alport syndrome	p.GLY1357SER
Core matrisome	Collagens	COL4A5	collagen, type IV, alpha 5	2207	H0Y998:H0Y9H0:H0Y9R8:P29400	NP_000486.1:NP_203699.1:XP_006724679.1	Alport syndrome	p.GLY1421TRP
Core matrisome	Collagens	COL4A5	collagen, type IV, alpha 5	2207	H0Y998:H0Y9H0:H0Y9R8:P29400	NP_000486.1:NP_203699.1:XP_006724679.1	Alport syndrome	p.GLY1442ARG
Core matrisome	Collagens	COL4A5	collagen, type IV, alpha 5	2207	H0Y998:H0Y9H0:H0Y9R8:P29400	NP_000486.1:NP_203699.1:XP_006724679.1	Alport syndrome	p.GLY1442ASP
Core matrisome	Collagens	COL4A5	collagen, type IV, alpha 5	2207	H0Y998:H0Y9H0:H0Y9R8:P29400	NP_000486.1:NP_203699.1:XP_006724679.1	Alport syndrome	p.GLY1448SER
Core matrisome	Collagens	COL4A5	collagen, type IV, alpha 5	2207	H0Y998:H0Y9H0:H0Y9R8:P29400	NP_000486.1:NP_203699.1:XP_006724679.1	Alport syndrome	p.GLY144SER
Core matrisome	Collagens	COL4A5	collagen, type IV, alpha 5	2207	H0Y998:H0Y9H0:H0Y9R8:P29400	NP_000486.1:NP_203699.1:XP_006724679.1	Alport syndrome	p.GLY1451SER
Core matrisome	Collagens	COL4A5	collagen, type IV, alpha 5	2207	H0Y998:H0Y9H0:H0Y9R8:P29400	NP_000486.1:NP_203699.1:XP_006724679.1	Alport syndrome	p.GLY1486ALA
Core matrisome	Collagens	COL4A5	collagen, type IV, alpha 5	2207	H0Y998:H0Y9H0:H0Y9R8:P29400	NP_000486.1:NP_203699.1:XP_006724679.1	Alport syndrome	p.GLY1596ASP
Core matrisome	Collagens	COL4A5	collagen, type IV, alpha 5	2207	H0Y998:H0Y9H0:H0Y9R8:P29400	NP_000486.1:NP_203699.1:XP_006724679.1	Alport syndrome	p.GLY174ARG
Core matrisome	Collagens	COL4A5	collagen, type IV, alpha 5	2207	H0Y998:H0Y9H0:H0Y9R8:P29400	NP_000486.1:NP_203699.1:XP_006724679.1	Alport syndrome	p.GLY177ARG
Core matrisome	Collagens	COL4A5	collagen, type IV, alpha 5	2207	H0Y998:H0Y9H0:H0Y9R8:P29400	NP_000486.1:NP_203699.1:XP_006724679.1	Alport syndrome	p.GLY183VAL
Core matrisome	Collagens	COL4A5	collagen, type IV, alpha 5	2207	H0Y998:H0Y9H0:H0Y9R8:P29400	NP_000486.1:NP_203699.1:XP_006724679.1	Alport syndrome	p.GLY192ARG
Core matrisome	Collagens	COL4A5	collagen, type IV, alpha 5	2207	H0Y998:H0Y9H0:H0Y9R8:P29400	NP_000486.1:NP_203699.1:XP_006724679.1	Alport syndrome	p.GLY195ASP
Core matrisome	Collagens	COL4A5	collagen, type IV, alpha 5	2207	H0Y998:H0Y9H0:H0Y9R8:P29400	NP_000486.1:NP_203699.1:XP_006724679.1	Alport syndrome	p.GLY198GLU
Core matrisome	Collagens	COL4A5	collagen, type IV, alpha 5	2207	H0Y998:H0Y9H0:H0Y9R8:P29400	NP_000486.1:NP_203699.1:XP_006724679.1	Alport syndrome	p.GLY201VAL
Core matrisome	Collagens	COL4A5	collagen, type IV, alpha 5	2207	H0Y998:H0Y9H0:H0Y9R8:P29400	NP_000486.1:NP_203699.1:XP_006724679.1	Alport syndrome	p.GLY213GLU
Core matrisome	Collagens	COL4A5	collagen, type IV, alpha 5	2207	H0Y998:H0Y9H0:H0Y9R8:P29400	NP_000486.1:NP_203699.1:XP_006724679.1	Alport syndrome	p.GLY216ARG
Core matrisome	Collagens	COL4A5	collagen, type IV, alpha 5	2207	H0Y998:H0Y9H0:H0Y9R8:P29400	NP_000486.1:NP_203699.1:XP_006724679.1	Alport syndrome	p.GLY216VAL
Core matrisome	Collagens	COL4A5	collagen, type IV, alpha 5	2207	H0Y998:H0Y9H0:H0Y9R8:P29400	NP_000486.1:NP_203699.1:XP_006724679.1	Alport syndrome	p.GLY219SER
Core matrisome	Collagens	COL4A5	collagen, type IV, alpha 5	2207	H0Y998:H0Y9H0:H0Y9R8:P29400	NP_000486.1:NP_203699.1:XP_006724679.1	Alport syndrome	p.GLY230ARG
Core matrisome	Collagens	COL4A5	collagen, type IV, alpha 5	2207	H0Y998:H0Y9H0:H0Y9R8:P29400	NP_000486.1:NP_203699.1:XP_006724679.1	Alport syndrome	p.GLY239GLU
Core matrisome	Collagens	COL4A5	collagen, type IV, alpha 5	2207	H0Y998:H0Y9H0:H0Y9R8:P29400	NP_000486.1:NP_203699.1:XP_006724679.1	Alport syndrome	p.GLY264ARG
Core matrisome	Collagens	COL4A5	collagen, type IV, alpha 5	2207	H0Y998:H0Y9H0:H0Y9R8:P29400	NP_000486.1:NP_203699.1:XP_006724679.1	Alport syndrome	p.GLY264ASP
Core matrisome	Collagens	COL4A5	collagen, type IV, alpha 5	2207	H0Y998:H0Y9H0:H0Y9R8:P29400	NP_000486.1:NP_203699.1:XP_006724679.1	Alport syndrome	p.GLY289VAL
Core matrisome	Collagens	COL4A5	collagen, type IV, alpha 5	2207	H0Y998:H0Y9H0:H0Y9R8:P29400	NP_000486.1:NP_203699.1:XP_006724679.1	Alport syndrome	p.GLY292ARG
Core matrisome	Collagens	COL4A5	collagen, type IV, alpha 5	2207	H0Y998:H0Y9H0:H0Y9R8:P29400	NP_000486.1:NP_203699.1:XP_006724679.1	Alport syndrome	p.GLY292VAL
Core matrisome	Collagens	COL4A5	collagen, type IV, alpha 5	2207	H0Y998:H0Y9H0:H0Y9R8:P29400	NP_000486.1:NP_203699.1:XP_006724679.1	Alport syndrome	p.GLY295ASP
Core matrisome	Collagens	COL4A5	collagen, type IV, alpha 5	2207	H0Y998:H0Y9H0:H0Y9R8:P29400	NP_000486.1:NP_203699.1:XP_006724679.1	Alport syndrome	p.GLY298SER
Core matrisome	Collagens	COL4A5	collagen, type IV, alpha 5	2207	H0Y998:H0Y9H0:H0Y9R8:P29400	NP_000486.1:NP_203699.1:XP_006724679.1	Alport syndrome	p.GLY310ARG
Core matrisome	Collagens	COL4A5	collagen, type IV, alpha 5	2207	H0Y998:H0Y9H0:H0Y9R8:P29400	NP_000486.1:NP_203699.1:XP_006724679.1	Alport syndrome	p.GLY313SER
Core matrisome	Collagens	COL4A5	collagen, type IV, alpha 5	2207	H0Y998:H0Y9H0:H0Y9R8:P29400	NP_000486.1:NP_203699.1:XP_006724679.1	Alport syndrome	p.GLY319ARG
Core matrisome	Collagens	COL4A5	collagen, type IV, alpha 5	2207	H0Y998:H0Y9H0:H0Y9R8:P29400	NP_000486.1:NP_203699.1:XP_006724679.1	Alport syndrome	p.GLY319ASP
Core matrisome	Collagens	COL4A5	collagen, type IV, alpha 5	2207	H0Y998:H0Y9H0:H0Y9R8:P29400	NP_000486.1:NP_203699.1:XP_006724679.1	Alport syndrome	p.GLY325ARG
Core matrisome	Collagens	COL4A5	collagen, type IV, alpha 5	2207	H0Y998:H0Y9H0:H0Y9R8:P29400	NP_000486.1:NP_203699.1:XP_006724679.1	Alport syndrome	p.GLY325GLU
Core matrisome	Collagens	COL4A5	collagen, type IV, alpha 5	2207	H0Y998:H0Y9H0:H0Y9R8:P29400	NP_000486.1:NP_203699.1:XP_006724679.1	Alport syndrome	p.GLY331VAL
Core matrisome	Collagens	COL4A5	collagen, type IV, alpha 5	2207	H0Y998:H0Y9H0:H0Y9R8:P29400	NP_000486.1:NP_203699.1:XP_006724679.1	Alport syndrome	p.GLY334VAL
Core matrisome	Collagens	COL4A5	collagen, type IV, alpha 5	2207	H0Y998:H0Y9H0:H0Y9R8:P29400	NP_000486.1:NP_203699.1:XP_006724679.1	Alport syndrome	p.GLY365GLU
Core matrisome	Collagens	COL4A5	collagen, type IV, alpha 5	2207	H0Y998:H0Y9H0:H0Y9R8:P29400	NP_000486.1:NP_203699.1:XP_006724679.1	Alport syndrome	p.GLY371GLU
Core matrisome	Collagens	COL4A5	collagen, type IV, alpha 5	2207	H0Y998:H0Y9H0:H0Y9R8:P29400	NP_000486.1:NP_203699.1:XP_006724679.1	Alport syndrome	p.GLY374ALA
Core matrisome	Collagens	COL4A5	collagen, type IV, alpha 5	2207	H0Y998:H0Y9H0:H0Y9R8:P29400	NP_000486.1:NP_203699.1:XP_006724679.1	Alport syndrome	p.GLY380ASP
Core matrisome	Collagens	COL4A5	collagen, type IV, alpha 5	2207	H0Y998:H0Y9H0:H0Y9R8:P29400	NP_000486.1:NP_203699.1:XP_006724679.1	Alport syndrome	p.GLY383ASP
Core matrisome	Collagens	COL4A5	collagen, type IV, alpha 5	2207	H0Y998:H0Y9H0:H0Y9R8:P29400	NP_000486.1:NP_203699.1:XP_006724679.1	Alport syndrome	p.GLY400GLU
Core matrisome	Collagens	COL4A5	collagen, type IV, alpha 5	2207	H0Y998:H0Y9H0:H0Y9R8:P29400	NP_000486.1:NP_203699.1:XP_006724679.1	Alport syndrome	p.GLY403VAL
Core matrisome	Collagens	COL4A5	collagen, type IV, alpha 5	2207	H0Y998:H0Y9H0:H0Y9R8:P29400	NP_000486.1:NP_203699.1:XP_006724679.1	Alport syndrome	p.GLY406VAL
Core matrisome	Collagens	COL4A5	collagen, type IV, alpha 5	2207	H0Y998:H0Y9H0:H0Y9R8:P29400	NP_000486.1:NP_203699.1:XP_006724679.1	Alport syndrome	p.GLY409ASP
Core matrisome	Collagens	COL4A5	collagen, type IV, alpha 5	2207	H0Y998:H0Y9H0:H0Y9R8:P29400	NP_000486.1:NP_203699.1:XP_006724679.1	Alport syndrome	p.GLY412VAL
Core matrisome	Collagens	COL4A5	collagen, type IV, alpha 5	2207	H0Y998:H0Y9H0:H0Y9R8:P29400	NP_000486.1:NP_203699.1:XP_006724679.1	Alport syndrome	p.GLY415ARG
Core matrisome	Collagens	COL4A5	collagen, type IV, alpha 5	2207	H0Y998:H0Y9H0:H0Y9R8:P29400	NP_000486.1:NP_203699.1:XP_006724679.1	Alport syndrome	p.GLY423GLU
Core matrisome	Collagens	COL4A5	collagen, type IV, alpha 5	2207	H0Y998:H0Y9H0:H0Y9R8:P29400	NP_000486.1:NP_203699.1:XP_006724679.1	Alport syndrome	p.GLY426ARG
Core matrisome	Collagens	COL4A5	collagen, type IV, alpha 5	2207	H0Y998:H0Y9H0:H0Y9R8:P29400	NP_000486.1:NP_203699.1:XP_006724679.1	Alport syndrome	p.GLY429GLU
Core matrisome	Collagens	COL4A5	collagen, type IV, alpha 5	2207	H0Y998:H0Y9H0:H0Y9R8:P29400	NP_000486.1:NP_203699.1:XP_006724679.1	Alport syndrome	p.GLY466GLU
Core matrisome	Collagens	COL4A5	collagen, type IV, alpha 5	2207	H0Y998:H0Y9H0:H0Y9R8:P29400	NP_000486.1:NP_203699.1:XP_006724679.1	Alport syndrome	p.GLY469GLU
Core matrisome	Collagens	COL4A5	collagen, type IV, alpha 5	2207	H0Y998:H0Y9H0:H0Y9R8:P29400	NP_000486.1:NP_203699.1:XP_006724679.1	Alport syndrome	p.GLY472ARG
Core matrisome	Collagens	COL4A5	collagen, type IV, alpha 5	2207	H0Y998:H0Y9H0:H0Y9R8:P29400	NP_000486.1:NP_203699.1:XP_006724679.1	Alport syndrome	p.GLY491GLU
Core matrisome	Collagens	COL4A5	collagen, type IV, alpha 5	2207	H0Y998:H0Y9H0:H0Y9R8:P29400	NP_000486.1:NP_203699.1:XP_006724679.1	Alport syndrome	p.GLY494ASP
Core matrisome	Collagens	COL4A5	collagen, type IV, alpha 5	2207	H0Y998:H0Y9H0:H0Y9R8:P29400	NP_000486.1:NP_203699.1:XP_006724679.1	Alport syndrome	p.GLY497CYS
Core matrisome	Collagens	COL4A5	collagen, type IV, alpha 5	2207	H0Y998:H0Y9H0:H0Y9R8:P29400	NP_000486.1:NP_203699.1:XP_006724679.1	Alport syndrome	p.GLY521ASP
Core matrisome	Collagens	COL4A5	collagen, type IV, alpha 5	2207	H0Y998:H0Y9H0:H0Y9R8:P29400	NP_000486.1:NP_203699.1:XP_006724679.1	Alport syndrome	p.GLY521CYS
Core matrisome	Collagens	COL4A5	collagen, type IV, alpha 5	2207	H0Y998:H0Y9H0:H0Y9R8:P29400	NP_000486.1:NP_203699.1:XP_006724679.1	Alport syndrome	p.GLY524ASP
Core matrisome	Collagens	COL4A5	collagen, type IV, alpha 5	2207	H0Y998:H0Y9H0:H0Y9R8:P29400	NP_000486.1:NP_203699.1:XP_006724679.1	Alport syndrome	p.GLY536ASP
Core matrisome	Collagens	COL4A5	collagen, type IV, alpha 5	2207	H0Y998:H0Y9H0:H0Y9R8:P29400	NP_000486.1:NP_203699.1:XP_006724679.1	Alport syndrome	p.GLY545ARG
Core matrisome	Collagens	COL4A5	collagen, type IV, alpha 5	2207	H0Y998:H0Y9H0:H0Y9R8:P29400	NP_000486.1:NP_203699.1:XP_006724679.1	Alport syndrome	p.GLY545VAL
Core matrisome	Collagens	COL4A5	collagen, type IV, alpha 5	2207	H0Y998:H0Y9H0:H0Y9R8:P29400	NP_000486.1:NP_203699.1:XP_006724679.1	Alport syndrome	p.GLY54ASP
Core matrisome	Collagens	COL4A5	collagen, type IV, alpha 5	2207	H0Y998:H0Y9H0:H0Y9R8:P29400	NP_000486.1:NP_203699.1:XP_006724679.1	Alport syndrome	p.GLY558ARG
Core matrisome	Collagens	COL4A5	collagen, type IV, alpha 5	2207	H0Y998:H0Y9H0:H0Y9R8:P29400	NP_000486.1:NP_203699.1:XP_006724679.1	Alport syndrome	p.GLY561ARG
Core matrisome	Collagens	COL4A5	collagen, type IV, alpha 5	2207	H0Y998:H0Y9H0:H0Y9R8:P29400	NP_000486.1:NP_203699.1:XP_006724679.1	Alport syndrome	p.GLY567ALA
Core matrisome	Collagens	COL4A5	collagen, type IV, alpha 5	2207	H0Y998:H0Y9H0:H0Y9R8:P29400	NP_000486.1:NP_203699.1:XP_006724679.1	Alport syndrome	p.GLY573ASP
Core matrisome	Collagens	COL4A5	collagen, type IV, alpha 5	2207	H0Y998:H0Y9H0:H0Y9R8:P29400	NP_000486.1:NP_203699.1:XP_006724679.1	Alport syndrome	p.GLY579ARG
Core matrisome	Collagens	COL4A5	collagen, type IV, alpha 5	2207	H0Y998:H0Y9H0:H0Y9R8:P29400	NP_000486.1:NP_203699.1:XP_006724679.1	Alport syndrome	p.GLY579GLU
Core matrisome	Collagens	COL4A5	collagen, type IV, alpha 5	2207	H0Y998:H0Y9H0:H0Y9R8:P29400	NP_000486.1:NP_203699.1:XP_006724679.1	Alport syndrome	p.GLY594SER
Core matrisome	Collagens	COL4A5	collagen, type IV, alpha 5	2207	H0Y998:H0Y9H0:H0Y9R8:P29400	NP_000486.1:NP_203699.1:XP_006724679.1	Alport syndrome	p.GLY595ARG
Core matrisome	Collagens	COL4A5	collagen, type IV, alpha 5	2207	H0Y998:H0Y9H0:H0Y9R8:P29400	NP_000486.1:NP_203699.1:XP_006724679.1	Alport syndrome	p.GLY5TER
Core matrisome	Collagens	COL4A5	collagen, type IV, alpha 5	2207	H0Y998:H0Y9H0:H0Y9R8:P29400	NP_000486.1:NP_203699.1:XP_006724679.1	Alport syndrome	p.GLY603VAL
Core matrisome	Collagens	COL4A5	collagen, type IV, alpha 5	2207	H0Y998:H0Y9H0:H0Y9R8:P29400	NP_000486.1:NP_203699.1:XP_006724679.1	Alport syndrome	p.GLY609ARG
Core matrisome	Collagens	COL4A5	collagen, type IV, alpha 5	2207	H0Y998:H0Y9H0:H0Y9R8:P29400	NP_000486.1:NP_203699.1:XP_006724679.1	Alport syndrome	p.GLY609VAL
Core matrisome	Collagens	COL4A5	collagen, type IV, alpha 5	2207	H0Y998:H0Y9H0:H0Y9R8:P29400	NP_000486.1:NP_203699.1:XP_006724679.1	Alport syndrome	p.GLY621CYS
Core matrisome	Collagens	COL4A5	collagen, type IV, alpha 5	2207	H0Y998:H0Y9H0:H0Y9R8:P29400	NP_000486.1:NP_203699.1:XP_006724679.1	Alport syndrome	p.GLY624ASP
Core matrisome	Collagens	COL4A5	collagen, type IV, alpha 5	2207	H0Y998:H0Y9H0:H0Y9R8:P29400	NP_000486.1:NP_203699.1:XP_006724679.1	Alport syndrome	p.GLY626ALA
Core matrisome	Collagens	COL4A5	collagen, type IV, alpha 5	2207	H0Y998:H0Y9H0:H0Y9R8:P29400	NP_000486.1:NP_203699.1:XP_006724679.1	Alport syndrome	p.GLY629ASP
Core matrisome	Collagens	COL4A5	collagen, type IV, alpha 5	2207	H0Y998:H0Y9H0:H0Y9R8:P29400	NP_000486.1:NP_203699.1:XP_006724679.1	Alport syndrome	p.GLY632ASP
Core matrisome	Collagens	COL4A5	collagen, type IV, alpha 5	2207	H0Y998:H0Y9H0:H0Y9R8:P29400	NP_000486.1:NP_203699.1:XP_006724679.1	Alport syndrome, X-linked	p.GLY638ASP
Core matrisome	Collagens	COL4A5	collagen, type IV, alpha 5	2207	H0Y998:H0Y9H0:H0Y9R8:P29400	NP_000486.1:NP_203699.1:XP_006724679.1	Alport syndrome	p.GLY638SER
Core matrisome	Collagens	COL4A5	collagen, type IV, alpha 5	2207	H0Y998:H0Y9H0:H0Y9R8:P29400	NP_000486.1:NP_203699.1:XP_006724679.1	Alport syndrome	p.GLY653ARG
Core matrisome	Collagens	COL4A5	collagen, type IV, alpha 5	2207	H0Y998:H0Y9H0:H0Y9R8:P29400	NP_000486.1:NP_203699.1:XP_006724679.1	Alport syndrome	p.GLY666ASP
Core matrisome	Collagens	COL4A5	collagen, type IV, alpha 5	2207	H0Y998:H0Y9H0:H0Y9R8:P29400	NP_000486.1:NP_203699.1:XP_006724679.1	Alport syndrome	p.GLY669ALA
Core matrisome	Collagens	COL4A5	collagen, type IV, alpha 5	2207	H0Y998:H0Y9H0:H0Y9R8:P29400	NP_000486.1:NP_203699.1:XP_006724679.1	Alport syndrome	p.GLY675SER
Core matrisome	Collagens	COL4A5	collagen, type IV, alpha 5	2207	H0Y998:H0Y9H0:H0Y9R8:P29400	NP_000486.1:NP_203699.1:XP_006724679.1	Alport syndrome	p.GLY681ASP
Core matrisome	Collagens	COL4A5	collagen, type IV, alpha 5	2207	H0Y998:H0Y9H0:H0Y9R8:P29400	NP_000486.1:NP_203699.1:XP_006724679.1	Alport syndrome	p.GLY684TER
Core matrisome	Collagens	COL4A5	collagen, type IV, alpha 5	2207	H0Y998:H0Y9H0:H0Y9R8:P29400	NP_000486.1:NP_203699.1:XP_006724679.1	Alport syndrome	p.GLY684VAL
Core matrisome	Collagens	COL4A5	collagen, type IV, alpha 5	2207	H0Y998:H0Y9H0:H0Y9R8:P29400	NP_000486.1:NP_203699.1:XP_006724679.1	Alport syndrome	p.GLY687GLU
Core matrisome	Collagens	COL4A5	collagen, type IV, alpha 5	2207	H0Y998:H0Y9H0:H0Y9R8:P29400	NP_000486.1:NP_203699.1:XP_006724679.1	Alport syndrome	p.GLY722GLU
Core matrisome	Collagens	COL4A5	collagen, type IV, alpha 5	2207	H0Y998:H0Y9H0:H0Y9R8:P29400	NP_000486.1:NP_203699.1:XP_006724679.1	Alport syndrome	p.GLY740GLU
Core matrisome	Collagens	COL4A5	collagen, type IV, alpha 5	2207	H0Y998:H0Y9H0:H0Y9R8:P29400	NP_000486.1:NP_203699.1:XP_006724679.1	Alport syndrome	p.GLY743ASP
Core matrisome	Collagens	COL4A5	collagen, type IV, alpha 5	2207	H0Y998:H0Y9H0:H0Y9R8:P29400	NP_000486.1:NP_203699.1:XP_006724679.1	Alport syndrome	p.GLY763ARG
Core matrisome	Collagens	COL4A5	collagen, type IV, alpha 5	2207	H0Y998:H0Y9H0:H0Y9R8:P29400	NP_000486.1:NP_203699.1:XP_006724679.1	Alport syndrome	p.GLY766ASP
Core matrisome	Collagens	COL4A5	collagen, type IV, alpha 5	2207	H0Y998:H0Y9H0:H0Y9R8:P29400	NP_000486.1:NP_203699.1:XP_006724679.1	Alport syndrome	p.GLY772ASP
Core matrisome	Collagens	COL4A5	collagen, type IV, alpha 5	2207	H0Y998:H0Y9H0:H0Y9R8:P29400	NP_000486.1:NP_203699.1:XP_006724679.1	Alport syndrome	p.GLY778SER
Core matrisome	Collagens	COL4A5	collagen, type IV, alpha 5	2207	H0Y998:H0Y9H0:H0Y9R8:P29400	NP_000486.1:NP_203699.1:XP_006724679.1	Alport syndrome	p.GLY787VAL
Core matrisome	Collagens	COL4A5	collagen, type IV, alpha 5	2207	H0Y998:H0Y9H0:H0Y9R8:P29400	NP_000486.1:NP_203699.1:XP_006724679.1	Alport syndrome	p.GLY796ARG
Core matrisome	Collagens	COL4A5	collagen, type IV, alpha 5	2207	H0Y998:H0Y9H0:H0Y9R8:P29400	NP_000486.1:NP_203699.1:XP_006724679.1	Alport syndrome	p.GLY802ARG
Core matrisome	Collagens	COL4A5	collagen, type IV, alpha 5	2207	H0Y998:H0Y9H0:H0Y9R8:P29400	NP_000486.1:NP_203699.1:XP_006724679.1	Alport syndrome	p.GLY808GLU
Core matrisome	Collagens	COL4A5	collagen, type IV, alpha 5	2207	H0Y998:H0Y9H0:H0Y9R8:P29400	NP_000486.1:NP_203699.1:XP_006724679.1	Alport syndrome	p.GLY811ARG
Core matrisome	Collagens	COL4A5	collagen, type IV, alpha 5	2207	H0Y998:H0Y9H0:H0Y9R8:P29400	NP_000486.1:NP_203699.1:XP_006724679.1	Alport syndrome	p.GLY811VAL
Core matrisome	Collagens	COL4A5	collagen, type IV, alpha 5	2207	H0Y998:H0Y9H0:H0Y9R8:P29400	NP_000486.1:NP_203699.1:XP_006724679.1	Alport syndrome	p.GLY822ARG
Core matrisome	Collagens	COL4A5	collagen, type IV, alpha 5	2207	H0Y998:H0Y9H0:H0Y9R8:P29400	NP_000486.1:NP_203699.1:XP_006724679.1	Alport syndrome	p.GLY852ARG
Core matrisome	Collagens	COL4A5	collagen, type IV, alpha 5	2207	H0Y998:H0Y9H0:H0Y9R8:P29400	NP_000486.1:NP_203699.1:XP_006724679.1	Alport syndrome	p.GLY852GLU
Core matrisome	Collagens	COL4A5	collagen, type IV, alpha 5	2207	H0Y998:H0Y9H0:H0Y9R8:P29400	NP_000486.1:NP_203699.1:XP_006724679.1	Alport syndrome	p.GLY866GLU
Core matrisome	Collagens	COL4A5	collagen, type IV, alpha 5	2207	H0Y998:H0Y9H0:H0Y9R8:P29400	NP_000486.1:NP_203699.1:XP_006724679.1	Alport syndrome	p.GLY869ARG
Core matrisome	Collagens	COL4A5	collagen, type IV, alpha 5	2207	H0Y998:H0Y9H0:H0Y9R8:P29400	NP_000486.1:NP_203699.1:XP_006724679.1	Alport syndrome	p.GLY872ARG
Core matrisome	Collagens	COL4A5	collagen, type IV, alpha 5	2207	H0Y998:H0Y9H0:H0Y9R8:P29400	NP_000486.1:NP_203699.1:XP_006724679.1	Alport syndrome	p.GLY875GLU
Core matrisome	Collagens	COL4A5	collagen, type IV, alpha 5	2207	H0Y998:H0Y9H0:H0Y9R8:P29400	NP_000486.1:NP_203699.1:XP_006724679.1	Alport syndrome	p.GLY878VAL
Core matrisome	Collagens	COL4A5	collagen, type IV, alpha 5	2207	H0Y998:H0Y9H0:H0Y9R8:P29400	NP_000486.1:NP_203699.1:XP_006724679.1	Alport syndrome	p.GLY887VAL
Core matrisome	Collagens	COL4A5	collagen, type IV, alpha 5	2207	H0Y998:H0Y9H0:H0Y9R8:P29400	NP_000486.1:NP_203699.1:XP_006724679.1	Alport syndrome, X-linked	p.GLY902GLU
Core matrisome	Collagens	COL4A5	collagen, type IV, alpha 5	2207	H0Y998:H0Y9H0:H0Y9R8:P29400	NP_000486.1:NP_203699.1:XP_006724679.1	Alport syndrome	p.GLY911GLU
Core matrisome	Collagens	COL4A5	collagen, type IV, alpha 5	2207	H0Y998:H0Y9H0:H0Y9R8:P29400	NP_000486.1:NP_203699.1:XP_006724679.1	Alport syndrome	p.GLY935ASP
Core matrisome	Collagens	COL4A5	collagen, type IV, alpha 5	2207	H0Y998:H0Y9H0:H0Y9R8:P29400	NP_000486.1:NP_203699.1:XP_006724679.1	Alport syndrome	p.GLY941CYS
Core matrisome	Collagens	COL4A5	collagen, type IV, alpha 5	2207	H0Y998:H0Y9H0:H0Y9R8:P29400	NP_000486.1:NP_203699.1:XP_006724679.1	Alport syndrome	p.GLY947ASP
Core matrisome	Collagens	COL4A5	collagen, type IV, alpha 5	2207	H0Y998:H0Y9H0:H0Y9R8:P29400	NP_000486.1:NP_203699.1:XP_006724679.1	Alport syndrome	p.GLY953VAL
Core matrisome	Collagens	COL4A5	collagen, type IV, alpha 5	2207	H0Y998:H0Y9H0:H0Y9R8:P29400	NP_000486.1:NP_203699.1:XP_006724679.1	Alport syndrome	p.LEU1649ARG
Core matrisome	Collagens	COL4A5	collagen, type IV, alpha 5	2207	H0Y998:H0Y9H0:H0Y9R8:P29400	NP_000486.1:NP_203699.1:XP_006724679.1	Alport syndrome	p.LYS1097TER
Core matrisome	Collagens	COL4A5	collagen, type IV, alpha 5	2207	H0Y998:H0Y9H0:H0Y9R8:P29400	NP_000486.1:NP_203699.1:XP_006724679.1	Alport syndrome	p.LYS1320TER
Core matrisome	Collagens	COL4A5	collagen, type IV, alpha 5	2207	H0Y998:H0Y9H0:H0Y9R8:P29400	NP_000486.1:NP_203699.1:XP_006724679.1	Alport syndrome	p.MET1VAL
Core matrisome	Collagens	COL4A5	collagen, type IV, alpha 5	2207	H0Y998:H0Y9H0:H0Y9R8:P29400	NP_000486.1:NP_203699.1:XP_006724679.1	Alport syndrome	p.MET898VAL
Core matrisome	Collagens	COL4A5	collagen, type IV, alpha 5	2207	H0Y998:H0Y9H0:H0Y9R8:P29400	NP_000486.1:NP_203699.1:XP_006724679.1	Alport syndrome, X-linked	p.PRO739ALA
Core matrisome	Collagens	COL4A5	collagen, type IV, alpha 5	2207	H0Y998:H0Y9H0:H0Y9R8:P29400	NP_000486.1:NP_203699.1:XP_006724679.1	Alport syndrome	p.SER1071TER
Core matrisome	Collagens	COL4A5	collagen, type IV, alpha 5	2207	H0Y998:H0Y9H0:H0Y9R8:P29400	NP_000486.1:NP_203699.1:XP_006724679.1	Alport syndrome	p.SER1488PHE
Core matrisome	Collagens	COL4A5	collagen, type IV, alpha 5	2207	H0Y998:H0Y9H0:H0Y9R8:P29400	NP_000486.1:NP_203699.1:XP_006724679.1	Alport syndrome, X-linked	p.SER1659ASN
Core matrisome	Collagens	COL4A5	collagen, type IV, alpha 5	2207	H0Y998:H0Y9H0:H0Y9R8:P29400	NP_000486.1:NP_203699.1:XP_006724679.1	Alport syndrome	p.SER916GLY
Core matrisome	Collagens	COL4A5	collagen, type IV, alpha 5	2207	H0Y998:H0Y9H0:H0Y9R8:P29400	NP_000486.1:NP_203699.1:XP_006724679.1	Alport syndrome	p.TRP1538TER
Core matrisome	Collagens	COL4A5	collagen, type IV, alpha 5	2207	H0Y998:H0Y9H0:H0Y9R8:P29400	NP_000486.1:NP_203699.1:XP_006724679.1	Alport syndrome	p.TRP1590GLY
Core matrisome	Collagens	COL4A5	collagen, type IV, alpha 5	2207	H0Y998:H0Y9H0:H0Y9R8:P29400	NP_000486.1:NP_203699.1:XP_006724679.1	Alport syndrome	p.TYR1597TER
Core matrisome	Collagens	COL4A5	collagen, type IV, alpha 5	2207	H0Y998:H0Y9H0:H0Y9R8:P29400	NP_000486.1:NP_203699.1:XP_006724679.1	Alport syndrome	p.TYR30TER
Core matrisome	Collagens	COL4A5	collagen, type IV, alpha 5	2207	H0Y998:H0Y9H0:H0Y9R8:P29400	NP_000486.1:NP_203699.1:XP_006724679.1	Alport syndrome, 301050 (3)	NA
Core matrisome	Collagens	COL4A5	collagen, type IV, alpha 5	2207	H0Y998:H0Y9H0:H0Y9R8:P29400	NP_000486.1:NP_203699.1:XP_006724679.1	X-linked Alport syndrome	NA
Core matrisome	Collagens	COL4A6	collagen, type IV, alpha 6	2208	A8MXH5:B4DZ39:F5H3Q5:F5H851:Q14031	NP_001274688.1:NP_001274689.1:NP_001274689.1:NP_001838.2:NP_378667.1	Leiomyomatosis, diffuse, with Alport syndrome, 308940 (3)	NA
Core matrisome	Collagens	COL4A6	collagen, type IV, alpha 6	2208	A8MXH5:B4DZ39:F5H3Q5:F5H851:Q14031	NP_001274688.1:NP_001274689.1:NP_001274689.1:NP_001838.2:NP_378667.1	X-linked nonsyndromic deafness	NA
Core matrisome	Collagens	COL5A1	collagen, type V, alpha 1	2209	H7BY82:P20908	NP_000084.3	Ehlers-Danlos syndrome, type 1	p.ARG792TER
Core matrisome	Collagens	COL5A1	collagen, type V, alpha 1	2209	H7BY82:P20908	NP_000084.3	Ehlers-Danlos syndrome	p.CYS1639SER
Core matrisome	Collagens	COL5A1	collagen, type V, alpha 1	2209	H7BY82:P20908	NP_000084.3	Ehlers-Danlos syndrome	p.GLY1489GLU
Core matrisome	Collagens	COL5A1	collagen, type V, alpha 1	2209	H7BY82:P20908	NP_000084.3	Ehlers-Danlos syndrome	p.GLY530SER
Core matrisome	Collagens	COL5A1	collagen, type V, alpha 1	2209	H7BY82:P20908	NP_000084.3	Ehlers-Danlos syndrome, type I, 130000 (3)	NA
Core matrisome	Collagens	COL5A1	collagen, type V, alpha 1	2209	H7BY82:P20908	NP_000084.3	Ehlers-Danlos syndrome, type II, 130010 (3)	NA
Core matrisome	Collagens	COL5A1	collagen, type V, alpha 1	2209	H7BY82:P20908	NP_000084.3	Ehlers-Danlos syndrome, classic type	NA
Core matrisome	Collagens	COL5A2	collagen, type V, alpha 2	2210	P05997	NP_000384.2	Ehlers-Danlos syndrome, type 2	p.GLY1149ARG
Core matrisome	Collagens	COL5A2	collagen, type V, alpha 2	2210	P05997	NP_000384.2	Ehlers-Danlos syndrome, type I, 130000 (3)	NA
Core matrisome	Collagens	COL5A2	collagen, type V, alpha 2	2210	P05997	NP_000384.2	Ehlers-Danlos syndrome type 2	NA
Core matrisome	Collagens	COL5A2	collagen, type V, alpha 2	2210	P05997	NP_000384.2	Ehlers-Danlos syndrome, classic type	NA
Core matrisome	Collagens	COL6A1	collagen, type VI, alpha 1	2211	P12109	NP_001839.2	Ullrich congenital muscular dystrophy	p.GLY281ARG
Core matrisome	Collagens	COL6A1	collagen, type VI, alpha 1	2211	P12109	NP_001839.2	Ullrich congenital muscular dystrophy	p.GLY284ARG
Core matrisome	Collagens	COL6A1	collagen, type VI, alpha 1	2211	P12109	NP_001839.2	Bethlem myopathy	p.GLY290ARG
Core matrisome	Collagens	COL6A1	collagen, type VI, alpha 1	2211	P12109	NP_001839.2	Bethlem myopathy	p.GLY526VAL
Core matrisome	Collagens	COL6A1	collagen, type VI, alpha 1	2211	P12109	NP_001839.2	Ullrich congenital muscular dystrophy	p.TYR659TER
Core matrisome	Collagens	COL6A1	collagen, type VI, alpha 1	2211	P12109	NP_001839.2	Bethlem myopathy, 158810 (3)	NA
Core matrisome	Collagens	COL6A1	collagen, type VI, alpha 1	2211	P12109	NP_001839.2	Ullrich congenital muscular dystrophy, 254090 (3)	NA
Core matrisome	Collagens	COL6A1	collagen, type VI, alpha 1	2211	P12109	NP_001839.2	Bethlem myopathy	NA
Core matrisome	Collagens	COL6A1	collagen, type VI, alpha 1	2211	P12109	NP_001839.2	Bethlem myopathy 1	NA
Core matrisome	Collagens	COL6A1	collagen, type VI, alpha 1	2211	P12109	NP_001839.2	Ullrich congenital muscular dystrophy	NA
Core matrisome	Collagens	COL6A1	collagen, type VI, alpha 1	2211	P12109	NP_001839.2	Ullrich congenital muscular dystrophy 1	NA
Core matrisome	Collagens	COL6A2	collagen, type VI, alpha 2	2212	C9JH44:H7C0M5:P12110	NP_001840.3:NP_478054.2:NP_478055.2	Ullrich congenital muscular dystrophy	p.ARG498HIS
Core matrisome	Collagens	COL6A2	collagen, type VI, alpha 2	2212	C9JH44:H7C0M5:P12110	NP_001840.3:NP_478054.2:NP_478055.2	BM	p.CYS777ARG
Core matrisome	Collagens	COL6A2	collagen, type VI, alpha 2	2212	C9JH44:H7C0M5:P12110	NP_001840.3:NP_478054.2:NP_478055.2	BETHLEM MYOPATHY, AUTOSOMAL RECESSIVE	p.GLN819TER
Core matrisome	Collagens	COL6A2	collagen, type VI, alpha 2	2212	C9JH44:H7C0M5:P12110	NP_001840.3:NP_478054.2:NP_478055.2	Ullrich congenital muscular dystrophy	p.GLY283ARG
Core matrisome	Collagens	COL6A2	collagen, type VI, alpha 2	2212	C9JH44:H7C0M5:P12110	NP_001840.3:NP_478054.2:NP_478055.2	Bethlem myopathy, 158810 (3)	NA
Core matrisome	Collagens	COL6A2	collagen, type VI, alpha 2	2212	C9JH44:H7C0M5:P12110	NP_001840.3:NP_478054.2:NP_478055.2	Ullrich scleroatonic muscular dystrophy, 254090 (3)	NA
Core matrisome	Collagens	COL6A2	collagen, type VI, alpha 2	2212	C9JH44:H7C0M5:P12110	NP_001840.3:NP_478054.2:NP_478055.2	Bethlem myopathy	NA
Core matrisome	Collagens	COL6A2	collagen, type VI, alpha 2	2212	C9JH44:H7C0M5:P12110	NP_001840.3:NP_478054.2:NP_478055.2	Bethlem myopathy 1	NA
Core matrisome	Collagens	COL6A2	collagen, type VI, alpha 2	2212	C9JH44:H7C0M5:P12110	NP_001840.3:NP_478054.2:NP_478055.2	myosclerosis	NA
Core matrisome	Collagens	COL6A2	collagen, type VI, alpha 2	2212	C9JH44:H7C0M5:P12110	NP_001840.3:NP_478054.2:NP_478055.2	Ullrich congenital muscular dystrophy	NA
Core matrisome	Collagens	COL6A2	collagen, type VI, alpha 2	2212	C9JH44:H7C0M5:P12110	NP_001840.3:NP_478054.2:NP_478055.2	Ullrich congenital muscular dystrophy 1	NA
Core matrisome	Collagens	COL6A3	collagen, type VI, alpha 3	2213	C9JNG9:E7ENL6:E9PCV6:I3L392:P12111	NP_004360.2:NP_476505.3:NP_476506.3:NP_476507.3:NP_476508.2:XP_005246122.1	Ullrich congenital muscular dystrophy	p.ARG465TER
Core matrisome	Collagens	COL6A3	collagen, type VI, alpha 3	2213	C9JNG9:E7ENL6:E9PCV6:I3L392:P12111	NP_004360.2:NP_476505.3:NP_476506.3:NP_476507.3:NP_476508.2:XP_005246122.1	Bethlem myopathy, 158810 (3)	NA
Core matrisome	Collagens	COL6A3	collagen, type VI, alpha 3	2213	C9JNG9:E7ENL6:E9PCV6:I3L392:P12111	NP_004360.2:NP_476505.3:NP_476506.3:NP_476507.3:NP_476508.2:XP_005246122.1	Ullrich congenital muscular dystrophy, 254090 (3)	NA
Core matrisome	Collagens	COL6A3	collagen, type VI, alpha 3	2213	C9JNG9:E7ENL6:E9PCV6:I3L392:P12111	NP_004360.2:NP_476505.3:NP_476506.3:NP_476507.3:NP_476508.2:XP_005246122.1	Bethlem myopathy	NA
Core matrisome	Collagens	COL6A3	collagen, type VI, alpha 3	2213	C9JNG9:E7ENL6:E9PCV6:I3L392:P12111	NP_004360.2:NP_476505.3:NP_476506.3:NP_476507.3:NP_476508.2:XP_005246122.1	Bethlem myopathy 1	NA
Core matrisome	Collagens	COL6A3	collagen, type VI, alpha 3	2213	C9JNG9:E7ENL6:E9PCV6:I3L392:P12111	NP_004360.2:NP_476505.3:NP_476506.3:NP_476507.3:NP_476508.2:XP_005246122.1	dystonia 27	NA
Core matrisome	Collagens	COL6A3	collagen, type VI, alpha 3	2213	C9JNG9:E7ENL6:E9PCV6:I3L392:P12111	NP_004360.2:NP_476505.3:NP_476506.3:NP_476507.3:NP_476508.2:XP_005246122.1	Ullrich congenital muscular dystrophy	NA
Core matrisome	Collagens	COL6A3	collagen, type VI, alpha 3	2213	C9JNG9:E7ENL6:E9PCV6:I3L392:P12111	NP_004360.2:NP_476505.3:NP_476506.3:NP_476507.3:NP_476508.2:XP_005246122.1	Ullrich congenital muscular dystrophy 1	NA
Core matrisome	Collagens	COL7A1	collagen, type VII, alpha 1	2214	C9JBL3:Q02388	NP_000085.1	Epidermolysis bullosa	p.ARG1630TER
Core matrisome	Collagens	COL7A1	collagen, type VII, alpha 1	2214	C9JBL3:Q02388	NP_000085.1	Epidermolysis bullosa dystrophica	p.ARG2063TRP
Core matrisome	Collagens	COL7A1	collagen, type VII, alpha 1	2214	C9JBL3:Q02388	NP_000085.1	Epidermolysis bullosa dystrophica	p.ARG2069CYS
Core matrisome	Collagens	COL7A1	collagen, type VII, alpha 1	2214	C9JBL3:Q02388	NP_000085.1	Epidermolysis bullosa	p.ARG236TER
Core matrisome	Collagens	COL7A1	collagen, type VII, alpha 1	2214	C9JBL3:Q02388	NP_000085.1	Epidermolysis bullosa dystrophica	p.ARG2471TER
Core matrisome	Collagens	COL7A1	collagen, type VII, alpha 1	2214	C9JBL3:Q02388	NP_000085.1	Epidermolysis bullosa dystrophica	p.GLY1347ARG
Core matrisome	Collagens	COL7A1	collagen, type VII, alpha 1	2214	C9JBL3:Q02388	NP_000085.1	Epidermolysis bullosa dystrophica	p.GLY1595ARG
Core matrisome	Collagens	COL7A1	collagen, type VII, alpha 1	2214	C9JBL3:Q02388	NP_000085.1	Epidermolysis bullosa dystrophica	p.GLY1815ARG
Core matrisome	Collagens	COL7A1	collagen, type VII, alpha 1	2214	C9JBL3:Q02388	NP_000085.1	Dominant dystrophic epidermolysis bullosa with absence of skin	p.GLY2003ARG
Core matrisome	Collagens	COL7A1	collagen, type VII, alpha 1	2214	C9JBL3:Q02388	NP_000085.1	Epidermolysis bullosa dystrophica	p.GLY2006ASP
Core matrisome	Collagens	COL7A1	collagen, type VII, alpha 1	2214	C9JBL3:Q02388	NP_000085.1	Epidermolysis bullosa dystrophica	p.GLY2015GLU
Core matrisome	Collagens	COL7A1	collagen, type VII, alpha 1	2214	C9JBL3:Q02388	NP_000085.1	Epidermolysis bullosa dystrophica	p.GLY2031SER
Core matrisome	Collagens	COL7A1	collagen, type VII, alpha 1	2214	C9JBL3:Q02388	NP_000085.1	Epidermolysis bullosa dystrophica	p.GLY2034ARG
Core matrisome	Collagens	COL7A1	collagen, type VII, alpha 1	2214	C9JBL3:Q02388	NP_000085.1	Epidermolysis bullosa dystrophica	p.GLY2037GLU
Core matrisome	Collagens	COL7A1	collagen, type VII, alpha 1	2214	C9JBL3:Q02388	NP_000085.1	Epidermolysis bullosa	p.GLY2040SER
Core matrisome	Collagens	COL7A1	collagen, type VII, alpha 1	2214	C9JBL3:Q02388	NP_000085.1	Epidermolysis bullosa dystrophica	p.GLY2043ARG
Core matrisome	Collagens	COL7A1	collagen, type VII, alpha 1	2214	C9JBL3:Q02388	NP_000085.1	Epidermolysis bullosa dystrophica	p.GLY2073VAL
Core matrisome	Collagens	COL7A1	collagen, type VII, alpha 1	2214	C9JBL3:Q02388	NP_000085.1	Epidermolysis bullosa dystrophica	p.GLY2076ASP
Core matrisome	Collagens	COL7A1	collagen, type VII, alpha 1	2214	C9JBL3:Q02388	NP_000085.1	Epidermolysis bullosa dystrophica	p.GLY2242ARG
Core matrisome	Collagens	COL7A1	collagen, type VII, alpha 1	2214	C9JBL3:Q02388	NP_000085.1	EPIDERMOLYSIS BULLOSA PRURIGINOSA, AUTOSOMAL DOMINANT	p.GLY2251GLU
Core matrisome	Collagens	COL7A1	collagen, type VII, alpha 1	2214	C9JBL3:Q02388	NP_000085.1	Epidermolysis bullosa dystrophica	p.GLY2287ARG
Core matrisome	Collagens	COL7A1	collagen, type VII, alpha 1	2214	C9JBL3:Q02388	NP_000085.1	Epidermolysis bullosa	p.GLY2623CYS
Core matrisome	Collagens	COL7A1	collagen, type VII, alpha 1	2214	C9JBL3:Q02388	NP_000085.1	Epidermolysis bullosa dystrophica	p.GLY2653ARG
Core matrisome	Collagens	COL7A1	collagen, type VII, alpha 1	2214	C9JBL3:Q02388	NP_000085.1	Recessive dystrophic epidermolysis bullosa	p.GLY2749TER
Core matrisome	Collagens	COL7A1	collagen, type VII, alpha 1	2214	C9JBL3:Q02388	NP_000085.1	Epidermolysis bullosa dystrophica autosomal recessive	p.LYS142ARG
Core matrisome	Collagens	COL7A1	collagen, type VII, alpha 1	2214	C9JBL3:Q02388	NP_000085.1	Epidermolysis bullosa	p.MET2798LYS
Core matrisome	Collagens	COL7A1	collagen, type VII, alpha 1	2214	C9JBL3:Q02388	NP_000085.1	Epidermolysis bullosa dystrophica	p.PRO1699LEU
Core matrisome	Collagens	COL7A1	collagen, type VII, alpha 1	2214	C9JBL3:Q02388	NP_000085.1	Recessive dystrophic epidermolysis bullosa	p.TYR311TYR
Core matrisome	Collagens	COL7A1	collagen, type VII, alpha 1	2214	C9JBL3:Q02388	NP_000085.1	EBD, Bart type, 132000 (3)	NA
Core matrisome	Collagens	COL7A1	collagen, type VII, alpha 1	2214	C9JBL3:Q02388	NP_000085.1	EBD, localisata variant (3)	NA
Core matrisome	Collagens	COL7A1	collagen, type VII, alpha 1	2214	C9JBL3:Q02388	NP_000085.1	Epidermolysis bullosa dystrophica, AD, 131750 (3)	NA
Core matrisome	Collagens	COL7A1	collagen, type VII, alpha 1	2214	C9JBL3:Q02388	NP_000085.1	Epidermolysis bullosa dystrophica, AR, 226600 (3)	NA
Core matrisome	Collagens	COL7A1	collagen, type VII, alpha 1	2214	C9JBL3:Q02388	NP_000085.1	Epidermolysis bullosa, pretibial, 131850 (3)	NA
Core matrisome	Collagens	COL7A1	collagen, type VII, alpha 1	2214	C9JBL3:Q02388	NP_000085.1	Epidermolysis bullosa pruriginosa, 604129 (3)	NA
Core matrisome	Collagens	COL7A1	collagen, type VII, alpha 1	2214	C9JBL3:Q02388	NP_000085.1	Toenail dystrophy, isolated, 607523 (3)	NA
Core matrisome	Collagens	COL7A1	collagen, type VII, alpha 1	2214	C9JBL3:Q02388	NP_000085.1	Transient bullous of the newborn, 131705 (3)	NA
Core matrisome	Collagens	COL7A1	collagen, type VII, alpha 1	2214	C9JBL3:Q02388	NP_000085.1	acral dystrophic epidermolysis bullosa	NA
Core matrisome	Collagens	COL7A1	collagen, type VII, alpha 1	2214	C9JBL3:Q02388	NP_000085.1	centripetalis recessive dystrophic epidermolysis bullosa	NA
Core matrisome	Collagens	COL7A1	collagen, type VII, alpha 1	2214	C9JBL3:Q02388	NP_000085.1	dystrophic epidermolysis bullosa pruriginosa	NA
Core matrisome	Collagens	COL7A1	collagen, type VII, alpha 1	2214	C9JBL3:Q02388	NP_000085.1	dystrophic epidermolysis bullosa, nails only	NA
Core matrisome	Collagens	COL7A1	collagen, type VII, alpha 1	2214	C9JBL3:Q02388	NP_000085.1	epidermolysis bullosa simplex superficialis	NA
Core matrisome	Collagens	COL7A1	collagen, type VII, alpha 1	2214	C9JBL3:Q02388	NP_000085.1	epidermolysis bullosa with congenital localized absence of skin and deformity of nails	NA
Core matrisome	Collagens	COL7A1	collagen, type VII, alpha 1	2214	C9JBL3:Q02388	NP_000085.1	generalized dominant dystrophic epidermolysis bullosa	NA
Core matrisome	Collagens	COL7A1	collagen, type VII, alpha 1	2214	C9JBL3:Q02388	NP_000085.1	nonsyndromic congenital nail disorder 8	NA
Core matrisome	Collagens	COL7A1	collagen, type VII, alpha 1	2214	C9JBL3:Q02388	NP_000085.1	pretibial dystrophic epidermolysis bullosa	NA
Core matrisome	Collagens	COL7A1	collagen, type VII, alpha 1	2214	C9JBL3:Q02388	NP_000085.1	recessive dystrophic epidermolysis bullosa	NA
Core matrisome	Collagens	COL7A1	collagen, type VII, alpha 1	2214	C9JBL3:Q02388	NP_000085.1	recessive dystrophic epidermolysis bullosa inversa	NA
Core matrisome	Collagens	COL7A1	collagen, type VII, alpha 1	2214	C9JBL3:Q02388	NP_000085.1	recessive dystrophic epidermolysis bullosa-generalized other	NA
Core matrisome	Collagens	COL7A1	collagen, type VII, alpha 1	2214	C9JBL3:Q02388	NP_000085.1	transient bullous dermolysis of the newborn	NA
Core matrisome	Collagens	COL8A2	collagen, type VIII, alpha 2	2216	E9PP49:P25067	NP_005193.1:XP_005270535.1:XP_005270536.1	Corneal dystrophy Fuchs endothelial 1	p.GLN455LYS
Core matrisome	Collagens	COL8A2	collagen, type VIII, alpha 2	2216	E9PP49:P25067	NP_005193.1:XP_005270535.1:XP_005270536.1	Corneal dystrophy Fuchs endothelial 1	p.LEU450TRP
Core matrisome	Collagens	COL8A2	collagen, type VIII, alpha 2	2216	E9PP49:P25067	NP_005193.1:XP_005270535.1:XP_005270536.1	Corneal dystrophy, hereditary polymorphous posterior, 2, 122000 (3)	NA
Core matrisome	Collagens	COL8A2	collagen, type VIII, alpha 2	2216	E9PP49:P25067	NP_005193.1:XP_005270535.1:XP_005270536.1	Fuchs endothelial corneal dystrophy, 136800 (3)	NA
Core matrisome	Collagens	COL8A2	collagen, type VIII, alpha 2	2216	E9PP49:P25067	NP_005193.1:XP_005270535.1:XP_005270536.1	corneal dystrophy, Fuchs endothelial, 1	NA
Core matrisome	Collagens	COL8A2	collagen, type VIII, alpha 2	2216	E9PP49:P25067	NP_005193.1:XP_005270535.1:XP_005270536.1	Fuchs' endothelial dystrophy	NA
Core matrisome	Collagens	COL8A2	collagen, type VIII, alpha 2	2216	E9PP49:P25067	NP_005193.1:XP_005270535.1:XP_005270536.1	posterior polymorphous corneal dystrophy	NA
Core matrisome	Collagens	COL8A2	collagen, type VIII, alpha 2	2216	E9PP49:P25067	NP_005193.1:XP_005270535.1:XP_005270536.1	posterior polymorphous corneal dystrophy 2	NA
Core matrisome	Collagens	COL9A1	collagen, type IX, alpha 1	2217	A6NEQ6:P20849	NP_001842.3:NP_511040.2	Stickler syndrome, type IV	p.ARG295TER
Core matrisome	Collagens	COL9A1	collagen, type IX, alpha 1	2217	A6NEQ6:P20849	NP_001842.3:NP_511040.2	Epiphyseal dysplasia, multiple, COL9A1-related (3)	NA
Core matrisome	Collagens	COL9A1	collagen, type IX, alpha 1	2217	A6NEQ6:P20849	NP_001842.3:NP_511040.2	autosomal recessive Stickler syndrome	NA
Core matrisome	Collagens	COL9A1	collagen, type IX, alpha 1	2217	A6NEQ6:P20849	NP_001842.3:NP_511040.2	multiple epiphyseal dysplasia due to collagen 9 anomaly	NA
Core matrisome	Collagens	COL9A1	collagen, type IX, alpha 1	2217	A6NEQ6:P20849	NP_001842.3:NP_511040.2	Stickler syndrome, type 4	NA
Core matrisome	Collagens	COL9A2	collagen, type IX, alpha 2	2218	B1AKJ1:B1AKJ3:H0Y409:Q14055	NP_001843.1:XP_006710428.1	Epiphyseal dysplasia, multiple, type 2, 600204 (3)	NA
Core matrisome	Collagens	COL9A2	collagen, type IX, alpha 2	2218	B1AKJ1:B1AKJ3:H0Y409:Q14055	NP_001843.1:XP_006710428.1	Intervertebral disc disease, susceptibility to, 603932 (3)	NA
Core matrisome	Collagens	COL9A2	collagen, type IX, alpha 2	2218	B1AKJ1:B1AKJ3:H0Y409:Q14055	NP_001843.1:XP_006710428.1	autosomal recessive Stickler syndrome	NA
Core matrisome	Collagens	COL9A2	collagen, type IX, alpha 2	2218	B1AKJ1:B1AKJ3:H0Y409:Q14055	NP_001843.1:XP_006710428.1	epiphyseal dysplasia, multiple, 2	NA
Core matrisome	Collagens	COL9A2	collagen, type IX, alpha 2	2218	B1AKJ1:B1AKJ3:H0Y409:Q14055	NP_001843.1:XP_006710428.1	multiple epiphyseal dysplasia due to collagen 9 anomaly	NA
Core matrisome	Collagens	COL9A3	collagen, type IX, alpha 3	2219	Q14050:Q4VXW1	NP_001844.3	INTERVERTEBRAL DISC DISEASE, SUSCEPTIBILITY TO	p.ARG103TRP
Core matrisome	Collagens	COL9A3	collagen, type IX, alpha 3	2219	Q14050:Q4VXW1	NP_001844.3	Epiphyseal dysplasia, multiple, 3, 600969 (3)	NA
Core matrisome	Collagens	COL9A3	collagen, type IX, alpha 3	2219	Q14050:Q4VXW1	NP_001844.3	Epiphyseal dysplasia, multiple, with myopathy (3)	NA
Core matrisome	Collagens	COL9A3	collagen, type IX, alpha 3	2219	Q14050:Q4VXW1	NP_001844.3	Intervertebral disc disease, susceptibility to, 603932 (3)	NA
Core matrisome	Collagens	COL9A3	collagen, type IX, alpha 3	2219	Q14050:Q4VXW1	NP_001844.3	autosomal recessive Stickler syndrome	NA
Core matrisome	Collagens	COL9A3	collagen, type IX, alpha 3	2219	Q14050:Q4VXW1	NP_001844.3	epiphyseal dysplasia, multiple, 3	NA
Core matrisome	Collagens	COL9A3	collagen, type IX, alpha 3	2219	Q14050:Q4VXW1	NP_001844.3	multiple epiphyseal dysplasia due to collagen 9 anomaly	NA
Core matrisome	ECM Glycoproteins	ADIPOQ	adiponectin, C1Q and collagen domain containing	13633	Q15848	NP_001171271.1:NP_004788.1	ADIPONECTIN DEFICIENCY	p.ARG112CYS
Core matrisome	ECM Glycoproteins	AEBP1	AE binding protein 1	NA	NA	NA	ehlers-danlos syndrome, classic-like, 2	NA
Core matrisome	ECM Glycoproteins	AGRN	agrin	329	H0Y5U1:O00468	NP_940978.2:XP_005244806.1:XP_006710696.1	congenital myasthenic syndrome 8	NA
Core matrisome	ECM Glycoproteins	AGRN	agrin	329	H0Y5U1:O00468	NP_940978.2:XP_005244806.1:XP_006710696.1	postsynaptic congenital myasthenic syndrome	NA
Core matrisome	ECM Glycoproteins	AGRN	agrin	329	H0Y5U1:O00468	NP_940978.2:XP_005244806.1:XP_006710696.1	presynaptic congenital myasthenic syndrome	NA
Core matrisome	ECM Glycoproteins	AMBN	ameloblastin (enamel matrix protein)	452	Q9NP70	NP_057603.1	amelogenesis imperfecta type 1	NA
Core matrisome	ECM Glycoproteins	AMBN	ameloblastin (enamel matrix protein)	452	Q9NP70	NP_057603.1	amelogenesis imperfecta type 1F	NA
Core matrisome	ECM Glycoproteins	AMELX	amelogenin (amelogenesis imperfecta 1, X-linked)	461	Q99217	NP_001133.1:NP_872621.1:NP_872622.1	Amelogenesis imperfecta	p.GLU191TER
Core matrisome	ECM Glycoproteins	AMELX	amelogenin (amelogenesis imperfecta 1, X-linked)	461	Q99217	NP_001133.1:NP_872621.1:NP_872622.1	Amelogenesis imperfecta	p.MET1THR
Core matrisome	ECM Glycoproteins	AMELX	amelogenin (amelogenesis imperfecta 1, X-linked)	461	Q99217	NP_001133.1:NP_872621.1:NP_872622.1	Amelogenesis imperfecta	p.PRO70THR
Core matrisome	ECM Glycoproteins	AMELX	amelogenin (amelogenesis imperfecta 1, X-linked)	461	Q99217	NP_001133.1:NP_872621.1:NP_872622.1	Amelogenesis imperfecta	p.THR51ILE
Core matrisome	ECM Glycoproteins	AMELX	amelogenin (amelogenesis imperfecta 1, X-linked)	461	Q99217	NP_001133.1:NP_872621.1:NP_872622.1	Amelogenesis imperfecta	p.TRP4SER
Core matrisome	ECM Glycoproteins	AMELX	amelogenin (amelogenesis imperfecta 1, X-linked)	461	Q99217	NP_001133.1:NP_872621.1:NP_872622.1	Amelogenesis imperfecta, 301200 (3)	NA
Core matrisome	ECM Glycoproteins	AMELX	amelogenin (amelogenesis imperfecta 1, X-linked)	461	Q99217	NP_001133.1:NP_872621.1:NP_872622.1	amelogenesis imperfecta type 1E	NA
Core matrisome	ECM Glycoproteins	AMELX	amelogenin (amelogenesis imperfecta 1, X-linked)	461	Q99217	NP_001133.1:NP_872621.1:NP_872622.1	amelogenesis imperfecta type 2	NA
Core matrisome	ECM Glycoproteins	BMPER	BMP binding endothelial regulator	24154	C9JY72:F8WDG9:G5E9K4:Q8N8U9	NP_597725.1	diaphanospondylodysostosis	NA
Core matrisome	ECM Glycoproteins	BMPER	BMP binding endothelial regulator	24154	C9JY72:F8WDG9:G5E9K4:Q8N8U9	NP_597725.1	ischio-vertebral syndrome	NA
Core matrisome	ECM Glycoproteins	CILP	cartilage intermediate layer protein, nucleotide pyrophosphohydrolase	1980	O75339	NP_003604.3	Lumbar disc disease	p.ILE395THR
Core matrisome	ECM Glycoproteins	CILP	cartilage intermediate layer protein, nucleotide pyrophosphohydrolase	1980	O75339	NP_003604.3	Lumbar disc disease, susceptibility to, 603932 (3)	NA
Core matrisome	ECM Glycoproteins	COCH	coagulation factor C homolog, cochlin (Limulus polyphemus)	2180	E7EN67:G3V4C4:G3V5G6:G3V5V4:G3V5X3:H0YJJ0:H0YJW4:O43405:Q96IU6	NP_001128530.1:NP_004077.1:XP_006720136.1	DFNA9	p.ALA119THR
Core matrisome	ECM Glycoproteins	COCH	coagulation factor C homolog, cochlin (Limulus polyphemus)	2180	E7EN67:G3V4C4:G3V5G6:G3V5V4:G3V5X3:H0YJJ0:H0YJW4:O43405:Q96IU6	NP_001128530.1:NP_004077.1:XP_006720136.1	DEAFNESS, AUTOSOMAL DOMINANT 9	p.CYS542TYR
Core matrisome	ECM Glycoproteins	COCH	coagulation factor C homolog, cochlin (Limulus polyphemus)	2180	E7EN67:G3V4C4:G3V5G6:G3V5V4:G3V5X3:H0YJJ0:H0YJW4:O43405:Q96IU6	NP_001128530.1:NP_004077.1:XP_006720136.1	DFNA9	p.GLY88GLU
Core matrisome	ECM Glycoproteins	COCH	coagulation factor C homolog, cochlin (Limulus polyphemus)	2180	E7EN67:G3V4C4:G3V5G6:G3V5V4:G3V5X3:H0YJJ0:H0YJW4:O43405:Q96IU6	NP_001128530.1:NP_004077.1:XP_006720136.1	DFNA9	p.ILE109ASN
Core matrisome	ECM Glycoproteins	COCH	coagulation factor C homolog, cochlin (Limulus polyphemus)	2180	E7EN67:G3V4C4:G3V5G6:G3V5V4:G3V5X3:H0YJJ0:H0YJW4:O43405:Q96IU6	NP_001128530.1:NP_004077.1:XP_006720136.1	DEAFNESS, AUTOSOMAL DOMINANT 9	p.MET512THR
Core matrisome	ECM Glycoproteins	COCH	coagulation factor C homolog, cochlin (Limulus polyphemus)	2180	E7EN67:G3V4C4:G3V5G6:G3V5V4:G3V5X3:H0YJJ0:H0YJW4:O43405:Q96IU6	NP_001128530.1:NP_004077.1:XP_006720136.1	DFNA9	p.PRO51SER
Core matrisome	ECM Glycoproteins	COCH	coagulation factor C homolog, cochlin (Limulus polyphemus)	2180	E7EN67:G3V4C4:G3V5G6:G3V5V4:G3V5X3:H0YJJ0:H0YJW4:O43405:Q96IU6	NP_001128530.1:NP_004077.1:XP_006720136.1	DFNA9	p.TRP117ARG
Core matrisome	ECM Glycoproteins	COCH	coagulation factor C homolog, cochlin (Limulus polyphemus)	2180	E7EN67:G3V4C4:G3V5G6:G3V5V4:G3V5X3:H0YJJ0:H0YJW4:O43405:Q96IU6	NP_001128530.1:NP_004077.1:XP_006720136.1	DFNA9	p.VAL66GLY
Core matrisome	ECM Glycoproteins	COCH	coagulation factor C homolog, cochlin (Limulus polyphemus)	2180	E7EN67:G3V4C4:G3V5G6:G3V5V4:G3V5X3:H0YJJ0:H0YJW4:O43405:Q96IU6	NP_001128530.1:NP_004077.1:XP_006720136.1	Deafness, autosomal dominant 9, 601369 (3)	NA
Core matrisome	ECM Glycoproteins	COCH	coagulation factor C homolog, cochlin (Limulus polyphemus)	2180	E7EN67:G3V4C4:G3V5G6:G3V5V4:G3V5X3:H0YJJ0:H0YJW4:O43405:Q96IU6	NP_001128530.1:NP_004077.1:XP_006720136.1	Meniere disease 156000 (3) ()	NA
Core matrisome	ECM Glycoproteins	COCH	coagulation factor C homolog, cochlin (Limulus polyphemus)	2180	E7EN67:G3V4C4:G3V5G6:G3V5V4:G3V5X3:H0YJJ0:H0YJW4:O43405:Q96IU6	NP_001128530.1:NP_004077.1:XP_006720136.1	autosomal dominant nonsyndromic deafness	NA
Core matrisome	ECM Glycoproteins	COCH	coagulation factor C homolog, cochlin (Limulus polyphemus)	2180	E7EN67:G3V4C4:G3V5G6:G3V5V4:G3V5X3:H0YJJ0:H0YJW4:O43405:Q96IU6	NP_001128530.1:NP_004077.1:XP_006720136.1	autosomal dominant nonsyndromic deafness 9	NA
Core matrisome	ECM Glycoproteins	COLQ	collagen-like tail subunit (single strand of homotrimer) of asymmetric acetylcholinesterase	2226	C9JBB2:F8WA67:Q9Y215:S4R408	NP_005668.2:NP_536799.1:NP_536800.2	Endplate acetylcholinesterase deficiency, 603034 (3)	NA
Core matrisome	ECM Glycoproteins	COLQ	collagen-like tail subunit (single strand of homotrimer) of asymmetric acetylcholinesterase	2226	C9JBB2:F8WA67:Q9Y215:S4R408	NP_005668.2:NP_536799.1:NP_536800.2	congenital myasthenic syndrome 5	NA
Core matrisome	ECM Glycoproteins	COLQ	collagen-like tail subunit (single strand of homotrimer) of asymmetric acetylcholinesterase	2226	C9JBB2:F8WA67:Q9Y215:S4R408	NP_005668.2:NP_536799.1:NP_536800.2	synaptic congenital myasthenic syndrome	NA
Core matrisome	ECM Glycoproteins	COMP	cartilage oligomeric matrix protein	2227	B4DKJ3:G3XAP6:P49747	NP_000086.2	EPIPHYSEAL DYSPLASIA, MULTIPLE, 1	p.ARG718TRP
Core matrisome	ECM Glycoproteins	COMP	cartilage oligomeric matrix protein	2227	B4DKJ3:G3XAP6:P49747	NP_000086.2	EPIPHYSEAL DYSPLASIA, MULTIPLE, 1, SEVERE	p.ASN453SER
Core matrisome	ECM Glycoproteins	COMP	cartilage oligomeric matrix protein	2227	B4DKJ3:G3XAP6:P49747	NP_000086.2	Multiple epiphyseal dysplasia	p.ASN523LYS
Core matrisome	ECM Glycoproteins	COMP	cartilage oligomeric matrix protein	2227	B4DKJ3:G3XAP6:P49747	NP_000086.2	EPIPHYSEAL DYSPLASIA, MULTIPLE, 1, SEVERE	p.ASP342TYR
Core matrisome	ECM Glycoproteins	COMP	cartilage oligomeric matrix protein	2227	B4DKJ3:G3XAP6:P49747	NP_000086.2	PSEUDOACHONDROPLASIA	p.ASP472TYR
Core matrisome	ECM Glycoproteins	COMP	cartilage oligomeric matrix protein	2227	B4DKJ3:G3XAP6:P49747	NP_000086.2	Pseudoachondroplasia	p.ASP473GLY
Core matrisome	ECM Glycoproteins	COMP	cartilage oligomeric matrix protein	2227	B4DKJ3:G3XAP6:P49747	NP_000086.2	PSEUDOACHONDROPLASIA	p.CYS328ARG
Core matrisome	ECM Glycoproteins	COMP	cartilage oligomeric matrix protein	2227	B4DKJ3:G3XAP6:P49747	NP_000086.2	PSEUDOACHONDROPLASIA	p.CYS348ARG
Core matrisome	ECM Glycoproteins	COMP	cartilage oligomeric matrix protein	2227	B4DKJ3:G3XAP6:P49747	NP_000086.2	PSEUDOACHONDROPLASIA	p.CYS468TYR
Core matrisome	ECM Glycoproteins	COMP	cartilage oligomeric matrix protein	2227	B4DKJ3:G3XAP6:P49747	NP_000086.2	Pseudoachondroplasia	p.GLY719ASP
Core matrisome	ECM Glycoproteins	COMP	cartilage oligomeric matrix protein	2227	B4DKJ3:G3XAP6:P49747	NP_000086.2	Epiphyseal dysplasia, multiple 1, 132400 (3)	NA
Core matrisome	ECM Glycoproteins	COMP	cartilage oligomeric matrix protein	2227	B4DKJ3:G3XAP6:P49747	NP_000086.2	Pseudoachondroplasia, 177170 (3)	NA
Core matrisome	ECM Glycoproteins	COMP	cartilage oligomeric matrix protein	2227	B4DKJ3:G3XAP6:P49747	NP_000086.2	multiple epiphyseal dysplasia type 1	NA
Core matrisome	ECM Glycoproteins	COMP	cartilage oligomeric matrix protein	2227	B4DKJ3:G3XAP6:P49747	NP_000086.2	pseudoachondroplasia	NA
Core matrisome	ECM Glycoproteins	CRELD1	cysteine-rich with EGF-like domains 1	14630	F8WBY3:H7C2L3:Q96HD1	NP_001026887.1:NP_001070883.1:NP_056328.2:XP_006713391.1	Atrioventricular septal defect, partial, with heterotaxy syndrome	p.ARG107HIS
Core matrisome	ECM Glycoproteins	CRELD1	cysteine-rich with EGF-like domains 1	14630	F8WBY3:H7C2L3:Q96HD1	NP_001026887.1:NP_001070883.1:NP_056328.2:XP_006713391.1	ATRIOVENTRICULAR SEPTAL DEFECT, SUSCEPTIBILITY TO, 2	p.ARG329CYS
Core matrisome	ECM Glycoproteins	CRELD1	cysteine-rich with EGF-like domains 1	14630	F8WBY3:H7C2L3:Q96HD1	NP_001026887.1:NP_001070883.1:NP_056328.2:XP_006713391.1	ATRIOVENTRICULAR SEPTAL DEFECT, SUSCEPTIBILITY TO, 2	p.GLU414LYS
Core matrisome	ECM Glycoproteins	CRELD1	cysteine-rich with EGF-like domains 1	14630	F8WBY3:H7C2L3:Q96HD1	NP_001026887.1:NP_001070883.1:NP_056328.2:XP_006713391.1	ATRIOVENTRICULAR SEPTAL DEFECT, SUSCEPTIBILITY TO, 2	p.PRO162ALA
Core matrisome	ECM Glycoproteins	CRELD1	cysteine-rich with EGF-like domains 1	14630	F8WBY3:H7C2L3:Q96HD1	NP_001026887.1:NP_001070883.1:NP_056328.2:XP_006713391.1	ATRIOVENTRICULAR SEPTAL DEFECT, SUSCEPTIBILITY TO, 2	p.THR311ILE
Core matrisome	ECM Glycoproteins	CRELD1	cysteine-rich with EGF-like domains 1	14630	F8WBY3:H7C2L3:Q96HD1	NP_001026887.1:NP_001070883.1:NP_056328.2:XP_006713391.1	Atrioventricular septal defect, partial, with heterotaxy syndrome, 606217 (3)	NA
Core matrisome	ECM Glycoproteins	CRELD1	cysteine-rich with EGF-like domains 1	14630	F8WBY3:H7C2L3:Q96HD1	NP_001026887.1:NP_001070883.1:NP_056328.2:XP_006713391.1	Atrioventricular septal defect, susceptibility to, 2, 606217 (3)	NA
Core matrisome	ECM Glycoproteins	CRELD1	cysteine-rich with EGF-like domains 1	14630	F8WBY3:H7C2L3:Q96HD1	NP_001026887.1:NP_001070883.1:NP_056328.2:XP_006713391.1	atrioventricular septal defect, susceptibility to, 2	NA
Core matrisome	ECM Glycoproteins	CRELD1	cysteine-rich with EGF-like domains 1	14630	F8WBY3:H7C2L3:Q96HD1	NP_001026887.1:NP_001070883.1:NP_056328.2:XP_006713391.1	partial atrioventricular canal	NA
Core matrisome	ECM Glycoproteins	CRIM1	cysteine rich transmembrane BMP regulator 1 (chordin-like)	2359	H7C1Z0:H7C2T6:H7C458:Q9NZV1	NP_057525.1	colobomatous macrophthalmia-microcornea syndrome	NA
Core matrisome	ECM Glycoproteins	CTHRC1	collagen triple helix repeat containing 1	18831	E5RK99:E7EVQ5:Q96CG8	NP_001243028.1:NP_612464.1	Barrett esophagus	NA
Core matrisome	ECM Glycoproteins	DMBT1	deleted in malignant brain tumors 1	2926	Q9UGM3	NP_004397.2:NP_015568.2:NP_060049.2	Glioblastoma multiforme, somatic, 137800 (3)	NA
Core matrisome	ECM Glycoproteins	DMP1	dentin matrix acidic phosphoprotein 1	2932	Q13316	NP_001073380.1:NP_004398.1	Autosomal recessive hypophosphatemic vitamin D refractory rickets	p.MET1VAL
Core matrisome	ECM Glycoproteins	DMP1	dentin matrix acidic phosphoprotein 1	2932	Q13316	NP_001073380.1:NP_004398.1	autosomal recessive hypophosphatemic rickets	NA
Core matrisome	ECM Glycoproteins	DMP1	dentin matrix acidic phosphoprotein 1	2932	Q13316	NP_001073380.1:NP_004398.1	hypophosphatemic rickets, autosomal recessive, 1	NA
Core matrisome	ECM Glycoproteins	DSPP	dentin sialophosphoprotein	3054	Q9NZW4	NP_055023.2	Dentinogenesis imperfecta - Shield's type II	p.ALA15VAL
Core matrisome	ECM Glycoproteins	DSPP	dentin sialophosphoprotein	3054	Q9NZW4	NP_055023.2	Dentinogenesis imperfecta - Shield's type II	p.ARG68TRP
Core matrisome	ECM Glycoproteins	DSPP	dentin sialophosphoprotein	3054	Q9NZW4	NP_055023.2	Dentinogenesis imperfecta - Shield's type II	p.GLN45TER
Core matrisome	ECM Glycoproteins	DSPP	dentin sialophosphoprotein	3054	Q9NZW4	NP_055023.2	Deafness, autosomal dominant nonsyndromic sensorineural 39, with dentinogenesis imperfecta 1	p.PRO17THR
Core matrisome	ECM Glycoproteins	DSPP	dentin sialophosphoprotein	3054	Q9NZW4	NP_055023.2	Denticles	p.TYR6ASP
Core matrisome	ECM Glycoproteins	DSPP	dentin sialophosphoprotein	3054	Q9NZW4	NP_055023.2	Deafness, autosomal dominant nonsyndromic sensorineural 39, with dentinogenesis imperfecta 1	p.VAL18PHE
Core matrisome	ECM Glycoproteins	DSPP	dentin sialophosphoprotein	3054	Q9NZW4	NP_055023.2	Deafness, autosomal dominant 36, with dentinogenesis, 605594 (3)	NA
Core matrisome	ECM Glycoproteins	DSPP	dentin sialophosphoprotein	3054	Q9NZW4	NP_055023.2	Dentin dysplasia, type II, 125420 (3)	NA
Core matrisome	ECM Glycoproteins	DSPP	dentin sialophosphoprotein	3054	Q9NZW4	NP_055023.2	Dentinogenesis imperfecta, Shields type II, 125490 (3)	NA
Core matrisome	ECM Glycoproteins	DSPP	dentin sialophosphoprotein	3054	Q9NZW4	NP_055023.2	Dentinogenesis imperfecta, Shields type III, 125500 (3)	NA
Core matrisome	ECM Glycoproteins	DSPP	dentin sialophosphoprotein	3054	Q9NZW4	NP_055023.2	deafness, autosomal dominant 39, with dentinogenesis imperfecta 1	NA
Core matrisome	ECM Glycoproteins	DSPP	dentin sialophosphoprotein	3054	Q9NZW4	NP_055023.2	dentin dysplasia type I	NA
Core matrisome	ECM Glycoproteins	DSPP	dentin sialophosphoprotein	3054	Q9NZW4	NP_055023.2	dentin dysplasia type II	NA
Core matrisome	ECM Glycoproteins	DSPP	dentin sialophosphoprotein	3054	Q9NZW4	NP_055023.2	dentinogenesis imperfecta type 2	NA
Core matrisome	ECM Glycoproteins	DSPP	dentin sialophosphoprotein	3054	Q9NZW4	NP_055023.2	dentinogenesis imperfecta type 3	NA
Core matrisome	ECM Glycoproteins	ECM1	extracellular matrix protein 1	3153	Q16610	NP_001189787.1:NP_004416.2:NP_073155.2	Lipid proteinosis	p.ARG53TER
Core matrisome	ECM Glycoproteins	ECM1	extracellular matrix protein 1	3153	Q16610	NP_001189787.1:NP_004416.2:NP_073155.2	Lipid proteinosis	p.GLN346TER
Core matrisome	ECM Glycoproteins	ECM1	extracellular matrix protein 1	3153	Q16610	NP_001189787.1:NP_004416.2:NP_073155.2	Lipid proteinosis	p.PHE167ILE
Core matrisome	ECM Glycoproteins	ECM1	extracellular matrix protein 1	3153	Q16610	NP_001189787.1:NP_004416.2:NP_073155.2	Lipoid proteinosis, 247100 (3)	NA
Core matrisome	ECM Glycoproteins	ECM1	extracellular matrix protein 1	3153	Q16610	NP_001189787.1:NP_004416.2:NP_073155.2	lipoid proteinosis	NA
Core matrisome	ECM Glycoproteins	EFEMP1	EGF-containing fibulin-like extracellular matrix protein 1	3218	C9J4H7:C9J4J8:C9J8S9:C9JPZ9:C9JQX7:C9JUM4:Q12805:Q580Q6	NP_001034437.1:NP_001034438.1	DHRD	p.ARG345TRP
Core matrisome	ECM Glycoproteins	EFEMP1	EGF-containing fibulin-like extracellular matrix protein 1	3218	C9J4H7:C9J4J8:C9J8S9:C9JPZ9:C9JQX7:C9JUM4:Q12805:Q580Q6	NP_001034437.1:NP_001034438.1	Doyne honeycomb degeneration of retina, 126600 (3)	NA
Core matrisome	ECM Glycoproteins	EFEMP1	EGF-containing fibulin-like extracellular matrix protein 1	3218	C9J4H7:C9J4J8:C9J8S9:C9JPZ9:C9JQX7:C9JUM4:Q12805:Q580Q6	NP_001034437.1:NP_001034438.1	Doyne honeycomb retinal dystrophy	NA
Core matrisome	ECM Glycoproteins	EFEMP2	EGF-containing fibulin-like extracellular matrix protein 2	3219	E9PI47:E9PKA3:E9PNB8:E9PRQ8:E9PRU1:E9PSC1:H0YCB5:H0YCR9:H0YET5:H0YEU0:O95967	NP_058634.4	Autosomal recessive cutis laxa type IA	p.ALA397THR
Core matrisome	ECM Glycoproteins	EFEMP2	EGF-containing fibulin-like extracellular matrix protein 2	3219	E9PI47:E9PKA3:E9PNB8:E9PRQ8:E9PRU1:E9PSC1:H0YCB5:H0YCR9:H0YET5:H0YEU0:O95967	NP_058634.4	Autosomal recessive cutis laxa type 1B	p.ARG279CYS
Core matrisome	ECM Glycoproteins	EFEMP2	EGF-containing fibulin-like extracellular matrix protein 2	3219	E9PI47:E9PKA3:E9PNB8:E9PRQ8:E9PRU1:E9PSC1:H0YCB5:H0YCR9:H0YET5:H0YEU0:O95967	NP_058634.4	Autosomal recessive cutis laxa type IA	p.ASP203ALA
Core matrisome	ECM Glycoproteins	EFEMP2	EGF-containing fibulin-like extracellular matrix protein 2	3219	E9PI47:E9PKA3:E9PNB8:E9PRQ8:E9PRU1:E9PSC1:H0YCB5:H0YCR9:H0YET5:H0YEU0:O95967	NP_058634.4	Autosomal recessive cutis laxa type 1B	p.CYS267TYR
Core matrisome	ECM Glycoproteins	EFEMP2	EGF-containing fibulin-like extracellular matrix protein 2	3219	E9PI47:E9PKA3:E9PNB8:E9PRQ8:E9PRU1:E9PSC1:H0YCB5:H0YCR9:H0YET5:H0YEU0:O95967	NP_058634.4	Autosomal recessive cutis laxa type IA	p.GLU126LYS
Core matrisome	ECM Glycoproteins	EFEMP2	EGF-containing fibulin-like extracellular matrix protein 2	3219	E9PI47:E9PKA3:E9PNB8:E9PRQ8:E9PRU1:E9PSC1:H0YCB5:H0YCR9:H0YET5:H0YEU0:O95967	NP_058634.4	Autosomal recessive cutis laxa type IA	p.GLU126VAL
Core matrisome	ECM Glycoproteins	EFEMP2	EGF-containing fibulin-like extracellular matrix protein 2	3219	E9PI47:E9PKA3:E9PNB8:E9PRQ8:E9PRU1:E9PSC1:H0YCB5:H0YCR9:H0YET5:H0YEU0:O95967	NP_058634.4	Autosomal recessive cutis laxa type 1B	p.GLU57LYS
Core matrisome	ECM Glycoproteins	EFEMP2	EGF-containing fibulin-like extracellular matrix protein 2	3219	E9PI47:E9PKA3:E9PNB8:E9PRQ8:E9PRU1:E9PSC1:H0YCB5:H0YCR9:H0YET5:H0YEU0:O95967	NP_058634.4	autosomal recessive cutis laxa type 1	NA
Core matrisome	ECM Glycoproteins	EFEMP2	EGF-containing fibulin-like extracellular matrix protein 2	3219	E9PI47:E9PKA3:E9PNB8:E9PRQ8:E9PRU1:E9PSC1:H0YCB5:H0YCR9:H0YET5:H0YEU0:O95967	NP_058634.4	cutis laxa, autosomal recessive, type 1B	NA
Core matrisome	ECM Glycoproteins	EFEMP2	EGF-containing fibulin-like extracellular matrix protein 2	3219	E9PI47:E9PKA3:E9PNB8:E9PRQ8:E9PRU1:E9PSC1:H0YCB5:H0YCR9:H0YET5:H0YEU0:O95967	NP_058634.4	lethal arteriopathy syndrome due to fibulin-4 deficiency	NA
Core matrisome	ECM Glycoproteins	ELN	elastin	3327	E7EN51:E7EN65:E7ENM0:E7ENW7:E7EP82:E7EQH8:E7ETP7:E7EWS8:E9PGX4:F8WAH6:G3V0G6:G5E950:H7C3K0:P15502	NP_000492.2:NP_001075221.1:NP_001075222.1:NP_001075223.1:NP_001075224.1:NP_001265844.1:NP_001265845.1:NP_001265841.1:NP_001265842.1:NP_001265843.1:NP_001265846.1	Supravalvar aortic stenosis	p.ARG527TER
Core matrisome	ECM Glycoproteins	ELN	elastin	3327	E7EN51:E7EN65:E7ENM0:E7ENW7:E7EP82:E7EQH8:E7ETP7:E7EWS8:E9PGX4:F8WAH6:G3V0G6:G5E950:H7C3K0:P15502	NP_000492.2:NP_001075221.1:NP_001075222.1:NP_001075223.1:NP_001075224.1:NP_001265844.1:NP_001265845.1:NP_001265841.1:NP_001265842.1:NP_001265843.1:NP_001265846.1	Williams syndrome	p.CYS682TYR
Core matrisome	ECM Glycoproteins	ELN	elastin	3327	E7EN51:E7EN65:E7ENM0:E7ENW7:E7EP82:E7EQH8:E7ETP7:E7EWS8:E9PGX4:F8WAH6:G3V0G6:G5E950:H7C3K0:P15502	NP_000492.2:NP_001075221.1:NP_001075222.1:NP_001075223.1:NP_001075224.1:NP_001265844.1:NP_001265845.1:NP_001265841.1:NP_001265842.1:NP_001265843.1:NP_001265846.1	Supravalvar aortic stenosis	p.GLN442TER
Core matrisome	ECM Glycoproteins	ELN	elastin	3327	E7EN51:E7EN65:E7ENM0:E7ENW7:E7EP82:E7EQH8:E7ETP7:E7EWS8:E9PGX4:F8WAH6:G3V0G6:G5E950:H7C3K0:P15502	NP_000492.2:NP_001075221.1:NP_001075222.1:NP_001075223.1:NP_001075224.1:NP_001265844.1:NP_001265845.1:NP_001265841.1:NP_001265842.1:NP_001265843.1:NP_001265846.1	Supravalvar aortic stenosis	p.LYS176TER
Core matrisome	ECM Glycoproteins	ELN	elastin	3327	E7EN51:E7EN65:E7ENM0:E7ENW7:E7EP82:E7EQH8:E7ETP7:E7EWS8:E9PGX4:F8WAH6:G3V0G6:G5E950:H7C3K0:P15502	NP_000492.2:NP_001075221.1:NP_001075222.1:NP_001075223.1:NP_001075224.1:NP_001265844.1:NP_001265845.1:NP_001265841.1:NP_001265842.1:NP_001265843.1:NP_001265846.1	Supravalvar aortic stenosis	p.TYR150TER
Core matrisome	ECM Glycoproteins	ELN	elastin	3327	E7EN51:E7EN65:E7ENM0:E7ENW7:E7EP82:E7EQH8:E7ETP7:E7EWS8:E9PGX4:F8WAH6:G3V0G6:G5E950:H7C3K0:P15502	NP_000492.2:NP_001075221.1:NP_001075222.1:NP_001075223.1:NP_001075224.1:NP_001265844.1:NP_001265845.1:NP_001265841.1:NP_001265842.1:NP_001265843.1:NP_001265846.1	Cutis laxa, AD, 123700 (3)	NA
Core matrisome	ECM Glycoproteins	ELN	elastin	3327	E7EN51:E7EN65:E7ENM0:E7ENW7:E7EP82:E7EQH8:E7ETP7:E7EWS8:E9PGX4:F8WAH6:G3V0G6:G5E950:H7C3K0:P15502	NP_000492.2:NP_001075221.1:NP_001075222.1:NP_001075223.1:NP_001075224.1:NP_001265844.1:NP_001265845.1:NP_001265841.1:NP_001265842.1:NP_001265843.1:NP_001265846.1	Supravalvar aortic stenosis, 185500 (3)	NA
Core matrisome	ECM Glycoproteins	ELN	elastin	3327	E7EN51:E7EN65:E7ENM0:E7ENW7:E7EP82:E7EQH8:E7ETP7:E7EWS8:E9PGX4:F8WAH6:G3V0G6:G5E950:H7C3K0:P15502	NP_000492.2:NP_001075221.1:NP_001075222.1:NP_001075223.1:NP_001075224.1:NP_001265844.1:NP_001265845.1:NP_001265841.1:NP_001265842.1:NP_001265843.1:NP_001265846.1	Williams-Beuren syndrome, 194050 (3)	NA
Core matrisome	ECM Glycoproteins	ELN	elastin	3327	E7EN51:E7EN65:E7ENM0:E7ENW7:E7EP82:E7EQH8:E7ETP7:E7EWS8:E9PGX4:F8WAH6:G3V0G6:G5E950:H7C3K0:P15502	NP_000492.2:NP_001075221.1:NP_001075222.1:NP_001075223.1:NP_001075224.1:NP_001265844.1:NP_001265845.1:NP_001265841.1:NP_001265842.1:NP_001265843.1:NP_001265846.1	autosomal dominant cutis laxa	NA
Core matrisome	ECM Glycoproteins	ELN	elastin	3327	E7EN51:E7EN65:E7ENM0:E7ENW7:E7EP82:E7EQH8:E7ETP7:E7EWS8:E9PGX4:F8WAH6:G3V0G6:G5E950:H7C3K0:P15502	NP_000492.2:NP_001075221.1:NP_001075222.1:NP_001075223.1:NP_001075224.1:NP_001265844.1:NP_001265845.1:NP_001265841.1:NP_001265842.1:NP_001265843.1:NP_001265846.1	cutis laxa, autosomal dominant 1	NA
Core matrisome	ECM Glycoproteins	ELN	elastin	3327	E7EN51:E7EN65:E7ENM0:E7ENW7:E7EP82:E7EQH8:E7ETP7:E7EWS8:E9PGX4:F8WAH6:G3V0G6:G5E950:H7C3K0:P15502	NP_000492.2:NP_001075221.1:NP_001075222.1:NP_001075223.1:NP_001075224.1:NP_001265844.1:NP_001265845.1:NP_001265841.1:NP_001265842.1:NP_001265843.1:NP_001265846.1	supravalvular aortic stenosis (disease)	NA
Core matrisome	ECM Glycoproteins	EMILIN1	elastin microfibril interfacer 1	19880	H0Y7A0:Q9Y6C2	NP_008977.1	EMILIN-1-related connective tissue disease	NA
Core matrisome	ECM Glycoproteins	EYS	eyes shut homolog (Drosophila)	21555	F8WDD3:H0Y3Q4:Q5T1H1	NP_001136272.1:NP_001136273.1:NP_938024.1	Retinitis pigmentosa	p.GLU1953TER
Core matrisome	ECM Glycoproteins	EYS	eyes shut homolog (Drosophila)	21555	F8WDD3:H0Y3Q4:Q5T1H1	NP_001136272.1:NP_001136273.1:NP_938024.1	Retinitis pigmentosa	p.TYR3135TER
Core matrisome	ECM Glycoproteins	EYS	eyes shut homolog (Drosophila)	21555	F8WDD3:H0Y3Q4:Q5T1H1	NP_001136272.1:NP_001136273.1:NP_938024.1	retinitis pigmentosa	NA
Core matrisome	ECM Glycoproteins	EYS	eyes shut homolog (Drosophila)	21555	F8WDD3:H0Y3Q4:Q5T1H1	NP_001136272.1:NP_001136273.1:NP_938024.1	retinitis pigmentosa 25	NA
Core matrisome	ECM Glycoproteins	FBLN1	fibulin 1	3600	B1AHL2:B1AHM4:B1AHM5:B1AHM6:B1AHM7:B1AHM8:B1AHM9:B1AHN3:F8W7M9:H7C1M6:P23142	NP_001987.2:NP_006476.2:NP_006477.2:NP_006478.2	Synpolydactyly, 3/3'4, associated with metacarpal and metatarsal synostoses, 608180	NA
Core matrisome	ECM Glycoproteins	FBLN1	fibulin 1	3600	B1AHL2:B1AHM4:B1AHM5:B1AHM6:B1AHM7:B1AHM8:B1AHM9:B1AHN3:F8W7M9:H7C1M6:P23142	NP_001987.2:NP_006476.2:NP_006477.2:NP_006478.2	FBLN1-related developmental delay-central nervous system anomaly-syndactyly syndrome	NA
Core matrisome	ECM Glycoproteins	FBLN1	fibulin 1	3600	B1AHL2:B1AHM4:B1AHM5:B1AHM6:B1AHM7:B1AHM8:B1AHM9:B1AHN3:F8W7M9:H7C1M6:P23142	NP_001987.2:NP_006476.2:NP_006477.2:NP_006478.2	synpolydactyly type 2	NA
Core matrisome	ECM Glycoproteins	FBLN5	fibulin 5	3602	G3V2P8:G3V329:G3V3Y2:G3V4U0:G3XA98:H0YJ31:Q9UBX5	NP_006320.2	Age-related macular degeneration	p.ALA363THR
Core matrisome	ECM Glycoproteins	FBLN5	fibulin 5	3602	G3V2P8:G3V329:G3V3Y2:G3V4U0:G3XA98:H0YJ31:Q9UBX5	NP_006320.2	Age-related macular degeneration	p.ARG351TRP
Core matrisome	ECM Glycoproteins	FBLN5	fibulin 5	3602	G3V2P8:G3V329:G3V3Y2:G3V4U0:G3XA98:H0YJ31:Q9UBX5	NP_006320.2	Age-related macular degeneration	p.ARG71GLN
Core matrisome	ECM Glycoproteins	FBLN5	fibulin 5	3602	G3V2P8:G3V329:G3V3Y2:G3V4U0:G3XA98:H0YJ31:Q9UBX5	NP_006320.2	Autosomal recessive cutis laxa type IA	p.CYS217ARG
Core matrisome	ECM Glycoproteins	FBLN5	fibulin 5	3602	G3V2P8:G3V329:G3V3Y2:G3V4U0:G3XA98:H0YJ31:Q9UBX5	NP_006320.2	Autosomal recessive cutis laxa type IA	p.GLU391TER
Core matrisome	ECM Glycoproteins	FBLN5	fibulin 5	3602	G3V2P8:G3V329:G3V3Y2:G3V4U0:G3XA98:H0YJ31:Q9UBX5	NP_006320.2	Autosomal recessive cutis laxa type IA	p.GLY202ARG
Core matrisome	ECM Glycoproteins	FBLN5	fibulin 5	3602	G3V2P8:G3V329:G3V3Y2:G3V4U0:G3XA98:H0YJ31:Q9UBX5	NP_006320.2	Age-related macular degeneration	p.GLY412GLU
Core matrisome	ECM Glycoproteins	FBLN5	fibulin 5	3602	G3V2P8:G3V329:G3V3Y2:G3V4U0:G3XA98:H0YJ31:Q9UBX5	NP_006320.2	Age-related macular degeneration	p.ILE169THR
Core matrisome	ECM Glycoproteins	FBLN5	fibulin 5	3602	G3V2P8:G3V329:G3V3Y2:G3V4U0:G3XA98:H0YJ31:Q9UBX5	NP_006320.2	Age-related macular degeneration	p.PRO87SER
Core matrisome	ECM Glycoproteins	FBLN5	fibulin 5	3602	G3V2P8:G3V329:G3V3Y2:G3V4U0:G3XA98:H0YJ31:Q9UBX5	NP_006320.2	Autosomal recessive cutis laxa type IA	p.SER227PRO
Core matrisome	ECM Glycoproteins	FBLN5	fibulin 5	3602	G3V2P8:G3V329:G3V3Y2:G3V4U0:G3XA98:H0YJ31:Q9UBX5	NP_006320.2	Age-related macular degeneration	p.VAL60LEU
Core matrisome	ECM Glycoproteins	FBLN5	fibulin 5	3602	G3V2P8:G3V329:G3V3Y2:G3V4U0:G3XA98:H0YJ31:Q9UBX5	NP_006320.2	Cutis laxa, autosomal dominant, 123700 (3)	NA
Core matrisome	ECM Glycoproteins	FBLN5	fibulin 5	3602	G3V2P8:G3V329:G3V3Y2:G3V4U0:G3XA98:H0YJ31:Q9UBX5	NP_006320.2	Cutis laxa, autosomal recessive, 219100 (3)	NA
Core matrisome	ECM Glycoproteins	FBLN5	fibulin 5	3602	G3V2P8:G3V329:G3V3Y2:G3V4U0:G3XA98:H0YJ31:Q9UBX5	NP_006320.2	Macular degeneration, age-related, 3, 608895 (3)	NA
Core matrisome	ECM Glycoproteins	FBLN5	fibulin 5	3602	G3V2P8:G3V329:G3V3Y2:G3V4U0:G3XA98:H0YJ31:Q9UBX5	NP_006320.2	autosomal dominant cutis laxa	NA
Core matrisome	ECM Glycoproteins	FBLN5	fibulin 5	3602	G3V2P8:G3V329:G3V3Y2:G3V4U0:G3XA98:H0YJ31:Q9UBX5	NP_006320.2	autosomal recessive cutis laxa type 1	NA
Core matrisome	ECM Glycoproteins	FBLN5	fibulin 5	3602	G3V2P8:G3V329:G3V3Y2:G3V4U0:G3XA98:H0YJ31:Q9UBX5	NP_006320.2	cutis laxa, autosomal recessive, type 1A	NA
Core matrisome	ECM Glycoproteins	FBLN5	fibulin 5	3602	G3V2P8:G3V329:G3V3Y2:G3V4U0:G3XA98:H0YJ31:Q9UBX5	NP_006320.2	hereditary sensorimotor neuropathy with hyperelastic skin	NA
Core matrisome	ECM Glycoproteins	FBLN5	fibulin 5	3602	G3V2P8:G3V329:G3V3Y2:G3V4U0:G3XA98:H0YJ31:Q9UBX5	NP_006320.2	macular degeneration, age-related, 3	NA
Core matrisome	ECM Glycoproteins	FBN1	fibrillin 1	3603	F6U495:H0YN80:H0YND0:P35555	NP_000129.3	Marfan's syndrome	p.ALA162THR
Core matrisome	ECM Glycoproteins	FBN1	fibrillin 1	3603	F6U495:H0YN80:H0YND0:P35555	NP_000129.3	Marfan's syndrome	p.ALA2324THR
Core matrisome	ECM Glycoproteins	FBN1	fibrillin 1	3603	F6U495:H0YN80:H0YND0:P35555	NP_000129.3	Marfan syndrome	p.ALA686ASP
Core matrisome	ECM Glycoproteins	FBN1	fibrillin 1	3603	F6U495:H0YN80:H0YND0:P35555	NP_000129.3	Marfan syndrome	p.ARG1137PRO
Core matrisome	ECM Glycoproteins	FBN1	fibrillin 1	3603	F6U495:H0YN80:H0YND0:P35555	NP_000129.3	Marfan syndrome	p.ARG1170HIS
Core matrisome	ECM Glycoproteins	FBN1	fibrillin 1	3603	F6U495:H0YN80:H0YND0:P35555	NP_000129.3	Marfan syndrome	p.ARG122CYS
Core matrisome	ECM Glycoproteins	FBN1	fibrillin 1	3603	F6U495:H0YN80:H0YND0:P35555	NP_000129.3	Ectopia lentis	p.ARG1530CYS
Core matrisome	ECM Glycoproteins	FBN1	fibrillin 1	3603	F6U495:H0YN80:H0YND0:P35555	NP_000129.3	Marfan syndrome	p.ARG1596TER
Core matrisome	ECM Glycoproteins	FBN1	fibrillin 1	3603	F6U495:H0YN80:H0YND0:P35555	NP_000129.3	ECTOPIA LENTIS 1, ISOLATED, AUTOSOMAL DOMINANT	p.ARG240CYS
Core matrisome	ECM Glycoproteins	FBN1	fibrillin 1	3603	F6U495:H0YN80:H0YND0:P35555	NP_000129.3	Marfan's syndrome	p.ARG2576CYS
Core matrisome	ECM Glycoproteins	FBN1	fibrillin 1	3603	F6U495:H0YN80:H0YND0:P35555	NP_000129.3	Marfan syndrome	p.ARG2726TRP
Core matrisome	ECM Glycoproteins	FBN1	fibrillin 1	3603	F6U495:H0YN80:H0YND0:P35555	NP_000129.3	Marfan syndrome	p.ARG2776TER
Core matrisome	ECM Glycoproteins	FBN1	fibrillin 1	3603	F6U495:H0YN80:H0YND0:P35555	NP_000129.3	Marfan syndrome	p.ARG485CYS
Core matrisome	ECM Glycoproteins	FBN1	fibrillin 1	3603	F6U495:H0YN80:H0YND0:P35555	NP_000129.3	Marfan syndrome	p.ARG529TER
Core matrisome	ECM Glycoproteins	FBN1	fibrillin 1	3603	F6U495:H0YN80:H0YND0:P35555	NP_000129.3	Marfan's syndrome	p.ARG545HIS
Core matrisome	ECM Glycoproteins	FBN1	fibrillin 1	3603	F6U495:H0YN80:H0YND0:P35555	NP_000129.3	Marfan syndrome	p.ARG650CYS
Core matrisome	ECM Glycoproteins	FBN1	fibrillin 1	3603	F6U495:H0YN80:H0YND0:P35555	NP_000129.3	Marfan syndrome	p.ASN1131TYR
Core matrisome	ECM Glycoproteins	FBN1	fibrillin 1	3603	F6U495:H0YN80:H0YND0:P35555	NP_000129.3	Marfan syndrome	p.ASN1489LYS
Core matrisome	ECM Glycoproteins	FBN1	fibrillin 1	3603	F6U495:H0YN80:H0YND0:P35555	NP_000129.3	Marfan's syndrome	p.ASN1851SER
Core matrisome	ECM Glycoproteins	FBN1	fibrillin 1	3603	F6U495:H0YN80:H0YND0:P35555	NP_000129.3	Marfan syndrome	p.ASN2144SER
Core matrisome	ECM Glycoproteins	FBN1	fibrillin 1	3603	F6U495:H0YN80:H0YND0:P35555	NP_000129.3	Marfan's syndrome	p.ASN2740SER
Core matrisome	ECM Glycoproteins	FBN1	fibrillin 1	3603	F6U495:H0YN80:H0YND0:P35555	NP_000129.3	Marfan's syndrome	p.ASN28SER
Core matrisome	ECM Glycoproteins	FBN1	fibrillin 1	3603	F6U495:H0YN80:H0YND0:P35555	NP_000129.3	Marfan syndrome	p.ASN548ILE
Core matrisome	ECM Glycoproteins	FBN1	fibrillin 1	3603	F6U495:H0YN80:H0YND0:P35555	NP_000129.3	Marfan syndrome	p.ASP1891HIS
Core matrisome	ECM Glycoproteins	FBN1	fibrillin 1	3603	F6U495:H0YN80:H0YND0:P35555	NP_000129.3	Marfan's syndrome	p.ASP2129TYR
Core matrisome	ECM Glycoproteins	FBN1	fibrillin 1	3603	F6U495:H0YN80:H0YND0:P35555	NP_000129.3	Marfan syndrome	p.ASP723ALA
Core matrisome	ECM Glycoproteins	FBN1	fibrillin 1	3603	F6U495:H0YN80:H0YND0:P35555	NP_000129.3	Marfan's syndrome	p.ASP893HIS
Core matrisome	ECM Glycoproteins	FBN1	fibrillin 1	3603	F6U495:H0YN80:H0YND0:P35555	NP_000129.3	Marfan syndrome	p.CYS1032TYR
Core matrisome	ECM Glycoproteins	FBN1	fibrillin 1	3603	F6U495:H0YN80:H0YND0:P35555	NP_000129.3	Marfan syndrome	p.CYS1074ARG
Core matrisome	ECM Glycoproteins	FBN1	fibrillin 1	3603	F6U495:H0YN80:H0YND0:P35555	NP_000129.3	Marfan syndrome	p.CYS1086TYR
Core matrisome	ECM Glycoproteins	FBN1	fibrillin 1	3603	F6U495:H0YN80:H0YND0:P35555	NP_000129.3	Marfan syndrome	p.CYS1117TYR
Core matrisome	ECM Glycoproteins	FBN1	fibrillin 1	3603	F6U495:H0YN80:H0YND0:P35555	NP_000129.3	Marfan syndrome	p.CYS1129TYR
Core matrisome	ECM Glycoproteins	FBN1	fibrillin 1	3603	F6U495:H0YN80:H0YND0:P35555	NP_000129.3	MARFAN SYNDROME	p.CYS1221TYR
Core matrisome	ECM Glycoproteins	FBN1	fibrillin 1	3603	F6U495:H0YN80:H0YND0:P35555	NP_000129.3	Marfan syndrome	p.CYS1223TYR
Core matrisome	ECM Glycoproteins	FBN1	fibrillin 1	3603	F6U495:H0YN80:H0YND0:P35555	NP_000129.3	Marfan syndrome	p.CYS1242TYR
Core matrisome	ECM Glycoproteins	FBN1	fibrillin 1	3603	F6U495:H0YN80:H0YND0:P35555	NP_000129.3	Marfan syndrome	p.CYS1249SER
Core matrisome	ECM Glycoproteins	FBN1	fibrillin 1	3603	F6U495:H0YN80:H0YND0:P35555	NP_000129.3	Marfan syndrome	p.CYS1265ARG
Core matrisome	ECM Glycoproteins	FBN1	fibrillin 1	3603	F6U495:H0YN80:H0YND0:P35555	NP_000129.3	Marfan syndrome	p.CYS129GLY
Core matrisome	ECM Glycoproteins	FBN1	fibrillin 1	3603	F6U495:H0YN80:H0YND0:P35555	NP_000129.3	Marfan's syndrome	p.CYS1389GLY
Core matrisome	ECM Glycoproteins	FBN1	fibrillin 1	3603	F6U495:H0YN80:H0YND0:P35555	NP_000129.3	Marfan's syndrome	p.CYS1562SER
Core matrisome	ECM Glycoproteins	FBN1	fibrillin 1	3603	F6U495:H0YN80:H0YND0:P35555	NP_000129.3	Marfan syndrome	p.CYS1663ARG
Core matrisome	ECM Glycoproteins	FBN1	fibrillin 1	3603	F6U495:H0YN80:H0YND0:P35555	NP_000129.3	Marfan's syndrome	p.CYS186ARG
Core matrisome	ECM Glycoproteins	FBN1	fibrillin 1	3603	F6U495:H0YN80:H0YND0:P35555	NP_000129.3	Marfan syndrome	p.CYS2221SER
Core matrisome	ECM Glycoproteins	FBN1	fibrillin 1	3603	F6U495:H0YN80:H0YND0:P35555	NP_000129.3	Marfan syndrome	p.CYS2307SER
Core matrisome	ECM Glycoproteins	FBN1	fibrillin 1	3603	F6U495:H0YN80:H0YND0:P35555	NP_000129.3	Marfan's syndrome	p.CYS2633SER
Core matrisome	ECM Glycoproteins	FBN1	fibrillin 1	3603	F6U495:H0YN80:H0YND0:P35555	NP_000129.3	Marfan's syndrome	p.CYS570TER
Core matrisome	ECM Glycoproteins	FBN1	fibrillin 1	3603	F6U495:H0YN80:H0YND0:P35555	NP_000129.3	Marfan syndrome	p.CYS790SER
Core matrisome	ECM Glycoproteins	FBN1	fibrillin 1	3603	F6U495:H0YN80:H0YND0:P35555	NP_000129.3	Marfan syndrome	p.CYS89PHE
Core matrisome	ECM Glycoproteins	FBN1	fibrillin 1	3603	F6U495:H0YN80:H0YND0:P35555	NP_000129.3	Marfan syndrome	p.GLU1073LYS
Core matrisome	ECM Glycoproteins	FBN1	fibrillin 1	3603	F6U495:H0YN80:H0YND0:P35555	NP_000129.3	Marfan's syndrome	p.GLU1160TER
Core matrisome	ECM Glycoproteins	FBN1	fibrillin 1	3603	F6U495:H0YN80:H0YND0:P35555	NP_000129.3	Marfan's syndrome	p.GLU2667LYS
Core matrisome	ECM Glycoproteins	FBN1	fibrillin 1	3603	F6U495:H0YN80:H0YND0:P35555	NP_000129.3	Marfan syndrome	p.GLY1013ARG
Core matrisome	ECM Glycoproteins	FBN1	fibrillin 1	3603	F6U495:H0YN80:H0YND0:P35555	NP_000129.3	Aortic aneurysm	p.GLY1127SER
Core matrisome	ECM Glycoproteins	FBN1	fibrillin 1	3603	F6U495:H0YN80:H0YND0:P35555	NP_000129.3	Marfan syndrome	p.GLY2627ARG
Core matrisome	ECM Glycoproteins	FBN1	fibrillin 1	3603	F6U495:H0YN80:H0YND0:P35555	NP_000129.3	Marfan syndrome	p.GLY985GLU
Core matrisome	ECM Glycoproteins	FBN1	fibrillin 1	3603	F6U495:H0YN80:H0YND0:P35555	NP_000129.3	Marfan's syndrome	p.HIS1187ARG
Core matrisome	ECM Glycoproteins	FBN1	fibrillin 1	3603	F6U495:H0YN80:H0YND0:P35555	NP_000129.3	Marfan's syndrome	p.HIS2410PRO
Core matrisome	ECM Glycoproteins	FBN1	fibrillin 1	3603	F6U495:H0YN80:H0YND0:P35555	NP_000129.3	Marfan syndrome	p.ILE2269THR
Core matrisome	ECM Glycoproteins	FBN1	fibrillin 1	3603	F6U495:H0YN80:H0YND0:P35555	NP_000129.3	Marfan syndrome	p.LYS1043ARG
Core matrisome	ECM Glycoproteins	FBN1	fibrillin 1	3603	F6U495:H0YN80:H0YND0:P35555	NP_000129.3	Marfan's syndrome	p.PHE2556VAL
Core matrisome	ECM Glycoproteins	FBN1	fibrillin 1	3603	F6U495:H0YN80:H0YND0:P35555	NP_000129.3	Marfan's syndrome	p.PRO1009ARG
Core matrisome	ECM Glycoproteins	FBN1	fibrillin 1	3603	F6U495:H0YN80:H0YND0:P35555	NP_000129.3	Marfan's syndrome	p.PRO2471ARG
Core matrisome	ECM Glycoproteins	FBN1	fibrillin 1	3603	F6U495:H0YN80:H0YND0:P35555	NP_000129.3	Marfan's syndrome	p.SER152CYS
Core matrisome	ECM Glycoproteins	FBN1	fibrillin 1	3603	F6U495:H0YN80:H0YND0:P35555	NP_000129.3	Marfan's syndrome	p.SER19PHE
Core matrisome	ECM Glycoproteins	FBN1	fibrillin 1	3603	F6U495:H0YN80:H0YND0:P35555	NP_000129.3	Marfan's syndrome	p.SER827PRO
Core matrisome	ECM Glycoproteins	FBN1	fibrillin 1	3603	F6U495:H0YN80:H0YND0:P35555	NP_000129.3	Marfan's syndrome	p.SER836ARG
Core matrisome	ECM Glycoproteins	FBN1	fibrillin 1	3603	F6U495:H0YN80:H0YND0:P35555	NP_000129.3	Marfan's syndrome	p.THR848PRO
Core matrisome	ECM Glycoproteins	FBN1	fibrillin 1	3603	F6U495:H0YN80:H0YND0:P35555	NP_000129.3	Marfan syndrome	p.TRP217GLY
Core matrisome	ECM Glycoproteins	FBN1	fibrillin 1	3603	F6U495:H0YN80:H0YND0:P35555	NP_000129.3	Marfan syndrome	p.TRP2602TER
Core matrisome	ECM Glycoproteins	FBN1	fibrillin 1	3603	F6U495:H0YN80:H0YND0:P35555	NP_000129.3	Marfan syndrome	p.TRP2756TER
Core matrisome	ECM Glycoproteins	FBN1	fibrillin 1	3603	F6U495:H0YN80:H0YND0:P35555	NP_000129.3	Marfan syndrome	p.TYR2113TER
Core matrisome	ECM Glycoproteins	FBN1	fibrillin 1	3603	F6U495:H0YN80:H0YND0:P35555	NP_000129.3	Marfan syndrome	p.TYR754CYS
Core matrisome	ECM Glycoproteins	FBN1	fibrillin 1	3603	F6U495:H0YN80:H0YND0:P35555	NP_000129.3	Marfan syndrome	p.VAL2234MET
Core matrisome	ECM Glycoproteins	FBN1	fibrillin 1	3603	F6U495:H0YN80:H0YND0:P35555	NP_000129.3	Marfan's syndrome	p.VAL2358ILE
Core matrisome	ECM Glycoproteins	FBN1	fibrillin 1	3603	F6U495:H0YN80:H0YND0:P35555	NP_000129.3	Aortic aneurysm, ascending, and dissection (3)	NA
Core matrisome	ECM Glycoproteins	FBN1	fibrillin 1	3603	F6U495:H0YN80:H0YND0:P35555	NP_000129.3	Ectopia lentis, familial, 129600 (3)	NA
Core matrisome	ECM Glycoproteins	FBN1	fibrillin 1	3603	F6U495:H0YN80:H0YND0:P35555	NP_000129.3	Marfan syndrome, 154700 (3)	NA
Core matrisome	ECM Glycoproteins	FBN1	fibrillin 1	3603	F6U495:H0YN80:H0YND0:P35555	NP_000129.3	MASS syndrome, 604308 (3)	NA
Core matrisome	ECM Glycoproteins	FBN1	fibrillin 1	3603	F6U495:H0YN80:H0YND0:P35555	NP_000129.3	Shprintzen-Goldberg syndrome, 182212 (3)	NA
Core matrisome	ECM Glycoproteins	FBN1	fibrillin 1	3603	F6U495:H0YN80:H0YND0:P35555	NP_000129.3	Weill-Marchesani syndrome, dominant, 608328 (3)	NA
Core matrisome	ECM Glycoproteins	FBN1	fibrillin 1	3603	F6U495:H0YN80:H0YND0:P35555	NP_000129.3	acromicric dysplasia	NA
Core matrisome	ECM Glycoproteins	FBN1	fibrillin 1	3603	F6U495:H0YN80:H0YND0:P35555	NP_000129.3	ectopia lentis 1, isolated, autosomal dominant	NA
Core matrisome	ECM Glycoproteins	FBN1	fibrillin 1	3603	F6U495:H0YN80:H0YND0:P35555	NP_000129.3	familial thoracic aortic aneurysm and aortic dissection	NA
Core matrisome	ECM Glycoproteins	FBN1	fibrillin 1	3603	F6U495:H0YN80:H0YND0:P35555	NP_000129.3	geleophysic dysplasia	NA
Core matrisome	ECM Glycoproteins	FBN1	fibrillin 1	3603	F6U495:H0YN80:H0YND0:P35555	NP_000129.3	Geleophysic dysplasia 2	NA
Core matrisome	ECM Glycoproteins	FBN1	fibrillin 1	3603	F6U495:H0YN80:H0YND0:P35555	NP_000129.3	glaucoma-ectopia-microspherophakia-stiff joints-short stature syndrome	NA
Core matrisome	ECM Glycoproteins	FBN1	fibrillin 1	3603	F6U495:H0YN80:H0YND0:P35555	NP_000129.3	isolated ectopia lentis	NA
Core matrisome	ECM Glycoproteins	FBN1	fibrillin 1	3603	F6U495:H0YN80:H0YND0:P35555	NP_000129.3	Marfan syndrome	NA
Core matrisome	ECM Glycoproteins	FBN1	fibrillin 1	3603	F6U495:H0YN80:H0YND0:P35555	NP_000129.3	MASS syndrome	NA
Core matrisome	ECM Glycoproteins	FBN1	fibrillin 1	3603	F6U495:H0YN80:H0YND0:P35555	NP_000129.3	neonatal Marfan syndrome	NA
Core matrisome	ECM Glycoproteins	FBN1	fibrillin 1	3603	F6U495:H0YN80:H0YND0:P35555	NP_000129.3	progeroid and marfanoid aspect-lipodystrophy syndrome	NA
Core matrisome	ECM Glycoproteins	FBN1	fibrillin 1	3603	F6U495:H0YN80:H0YND0:P35555	NP_000129.3	stiff skin syndrome	NA
Core matrisome	ECM Glycoproteins	FBN1	fibrillin 1	3603	F6U495:H0YN80:H0YND0:P35555	NP_000129.3	Weill-Marchesani syndrome	NA
Core matrisome	ECM Glycoproteins	FBN2	fibrillin 2	3604	D6REJ2:D6RJI3:E9PHW4:P35556	NP_001990.2	Congenital contractural arachnodactyly	p.ASN1259LYS
Core matrisome	ECM Glycoproteins	FBN2	fibrillin 2	3604	D6REJ2:D6RJI3:E9PHW4:P35556	NP_001990.2	Congenital contractural arachnodactyly	p.ASP1115HIS
Core matrisome	ECM Glycoproteins	FBN2	fibrillin 2	3604	D6REJ2:D6RJI3:E9PHW4:P35556	NP_001990.2	Congenital contractural arachnodactyly	p.CYS1142PHE
Core matrisome	ECM Glycoproteins	FBN2	fibrillin 2	3604	D6REJ2:D6RJI3:E9PHW4:P35556	NP_001990.2	Congenital contractural arachnodactyly	p.CYS1253TRP
Core matrisome	ECM Glycoproteins	FBN2	fibrillin 2	3604	D6REJ2:D6RJI3:E9PHW4:P35556	NP_001990.2	Congenital contractural arachnodactyly	p.CYS1253TYR
Core matrisome	ECM Glycoproteins	FBN2	fibrillin 2	3604	D6REJ2:D6RJI3:E9PHW4:P35556	NP_001990.2	Congenital contractural arachnodactyly	p.GLU391LYS
Core matrisome	ECM Glycoproteins	FBN2	fibrillin 2	3604	D6REJ2:D6RJI3:E9PHW4:P35556	NP_001990.2	Contractural arachnodactyly, congenital (3)	NA
Core matrisome	ECM Glycoproteins	FBN2	fibrillin 2	3604	D6REJ2:D6RJI3:E9PHW4:P35556	NP_001990.2	congenital contractural arachnodactyly	NA
Core matrisome	ECM Glycoproteins	FBN2	fibrillin 2	3604	D6REJ2:D6RJI3:E9PHW4:P35556	NP_001990.2	macular degeneration, early-onset	NA
Core matrisome	ECM Glycoproteins	FGA	fibrinogen alpha chain	3661	P02671	NP_000499.1:NP_068657.1	Dysfibrinogenaemia	p.ARG35CYS
Core matrisome	ECM Glycoproteins	FGA	fibrinogen alpha chain	3661	P02671	NP_000499.1:NP_068657.1	Dysfibrinogenaemia	p.ARG35HIS
Core matrisome	ECM Glycoproteins	FGA	fibrinogen alpha chain	3661	P02671	NP_000499.1:NP_068657.1	Dysfibrinogenaemia	p.ARG38GLY
Core matrisome	ECM Glycoproteins	FGA	fibrinogen alpha chain	3661	P02671	NP_000499.1:NP_068657.1	Dysfibrinogenaemia	p.ARG573CYS
Core matrisome	ECM Glycoproteins	FGA	fibrinogen alpha chain	3661	P02671	NP_000499.1:NP_068657.1	Amyloidosis, renal	p.ARG573LEU
Core matrisome	ECM Glycoproteins	FGA	fibrinogen alpha chain	3661	P02671	NP_000499.1:NP_068657.1	Dysfibrinogenaemia	p.ASP26ASN
Core matrisome	ECM Glycoproteins	FGA	fibrinogen alpha chain	3661	P02671	NP_000499.1:NP_068657.1	FIBRINOGEN KEOKUK	p.GLN347TER
Core matrisome	ECM Glycoproteins	FGA	fibrinogen alpha chain	3661	P02671	NP_000499.1:NP_068657.1	Amyloidosis, renal	p.GLU545VAL
Core matrisome	ECM Glycoproteins	FGA	fibrinogen alpha chain	3661	P02671	NP_000499.1:NP_068657.1	FIBRINOGEN ROUEN 1	p.GLY31VAL
Core matrisome	ECM Glycoproteins	FGA	fibrinogen alpha chain	3661	P02671	NP_000499.1:NP_068657.1	Dysfibrinogenaemia	p.LYS480TER
Core matrisome	ECM Glycoproteins	FGA	fibrinogen alpha chain	3661	P02671	NP_000499.1:NP_068657.1	Dysfibrinogenaemia	p.PRO37LEU
Core matrisome	ECM Glycoproteins	FGA	fibrinogen alpha chain	3661	P02671	NP_000499.1:NP_068657.1	Dysfibrinogenaemia	p.SER453ASN
Core matrisome	ECM Glycoproteins	FGA	fibrinogen alpha chain	3661	P02671	NP_000499.1:NP_068657.1	Venous thromboembolism, susceptibility to	p.THR331ALA
Core matrisome	ECM Glycoproteins	FGA	fibrinogen alpha chain	3661	P02671	NP_000499.1:NP_068657.1	Dysfibrinogenaemia	p.VAL39ASP
Core matrisome	ECM Glycoproteins	FGA	fibrinogen alpha chain	3661	P02671	NP_000499.1:NP_068657.1	Afibrinogenemia, 202400 (3)	NA
Core matrisome	ECM Glycoproteins	FGA	fibrinogen alpha chain	3661	P02671	NP_000499.1:NP_068657.1	Amyloidosis, hereditary renal, 105200 (3)	NA
Core matrisome	ECM Glycoproteins	FGA	fibrinogen alpha chain	3661	P02671	NP_000499.1:NP_068657.1	Dysfibrinogenemia, alpha type, causing bleeding diathesis (3)	NA
Core matrisome	ECM Glycoproteins	FGA	fibrinogen alpha chain	3661	P02671	NP_000499.1:NP_068657.1	Dysfibrinogenemia, alpha type, causing recurrent thrombosis (3)	NA
Core matrisome	ECM Glycoproteins	FGA	fibrinogen alpha chain	3661	P02671	NP_000499.1:NP_068657.1	AFib amyloidosis	NA
Core matrisome	ECM Glycoproteins	FGA	fibrinogen alpha chain	3661	P02671	NP_000499.1:NP_068657.1	congenital afibrinogenemia	NA
Core matrisome	ECM Glycoproteins	FGA	fibrinogen alpha chain	3661	P02671	NP_000499.1:NP_068657.1	familial dysfibrinogenemia	NA
Core matrisome	ECM Glycoproteins	FGA	fibrinogen alpha chain	3661	P02671	NP_000499.1:NP_068657.1	familial hypodysfibrinogenemia	NA
Core matrisome	ECM Glycoproteins	FGA	fibrinogen alpha chain	3661	P02671	NP_000499.1:NP_068657.1	familial hypofibrinogenemia	NA
Core matrisome	ECM Glycoproteins	FGA	fibrinogen alpha chain	3661	P02671	NP_000499.1:NP_068657.1	familial visceral amyloidosis	NA
Core matrisome	ECM Glycoproteins	FGB	fibrinogen beta chain	3662	D6REL8:F8W6P4:P02675	NP_001171670.1:NP_005132.2	FIBRINOGEN PONTOISE 2	p.ALA365THR
Core matrisome	ECM Glycoproteins	FGB	fibrinogen beta chain	3662	D6REL8:F8W6P4:P02675	NP_001171670.1:NP_005132.2	Dysfibrinogenaemia	p.ALA98THR
Core matrisome	ECM Glycoproteins	FGB	fibrinogen beta chain	3662	D6REL8:F8W6P4:P02675	NP_001171670.1:NP_005132.2	Congenital afibrinogenemia	p.ARG196CYS
Core matrisome	ECM Glycoproteins	FGB	fibrinogen beta chain	3662	D6REL8:F8W6P4:P02675	NP_001171670.1:NP_005132.2	Dysfibrinogenaemia	p.ARG44CYS
Core matrisome	ECM Glycoproteins	FGB	fibrinogen beta chain	3662	D6REL8:F8W6P4:P02675	NP_001171670.1:NP_005132.2	FIBRINOGEN BALTIMORE 2	p.ARG478LYS
Core matrisome	ECM Glycoproteins	FGB	fibrinogen beta chain	3662	D6REL8:F8W6P4:P02675	NP_001171670.1:NP_005132.2	Afibrinogenaemia	p.ARG47TER
Core matrisome	ECM Glycoproteins	FGB	fibrinogen beta chain	3662	D6REL8:F8W6P4:P02675	NP_001171670.1:NP_005132.2	Afibrinogenaemia	p.GLY430ASP
Core matrisome	ECM Glycoproteins	FGB	fibrinogen beta chain	3662	D6REL8:F8W6P4:P02675	NP_001171670.1:NP_005132.2	Dysfibrinogenaemia	p.GLY45CYS
Core matrisome	ECM Glycoproteins	FGB	fibrinogen beta chain	3662	D6REL8:F8W6P4:P02675	NP_001171670.1:NP_005132.2	Afibrinogenaemia	p.LEU202GLN
Core matrisome	ECM Glycoproteins	FGB	fibrinogen beta chain	3662	D6REL8:F8W6P4:P02675	NP_001171670.1:NP_005132.2	Afibrinogenaemia	p.LEU383ARG
Core matrisome	ECM Glycoproteins	FGB	fibrinogen beta chain	3662	D6REL8:F8W6P4:P02675	NP_001171670.1:NP_005132.2	Afibrinogenemia, congenital, 202400 (3)	NA
Core matrisome	ECM Glycoproteins	FGB	fibrinogen beta chain	3662	D6REL8:F8W6P4:P02675	NP_001171670.1:NP_005132.2	Dysfibrinogenemia, beta type (3)	NA
Core matrisome	ECM Glycoproteins	FGB	fibrinogen beta chain	3662	D6REL8:F8W6P4:P02675	NP_001171670.1:NP_005132.2	Thrombophilia, dysfibrinogenemic (3)	NA
Core matrisome	ECM Glycoproteins	FGB	fibrinogen beta chain	3662	D6REL8:F8W6P4:P02675	NP_001171670.1:NP_005132.2	congenital afibrinogenemia	NA
Core matrisome	ECM Glycoproteins	FGB	fibrinogen beta chain	3662	D6REL8:F8W6P4:P02675	NP_001171670.1:NP_005132.2	familial dysfibrinogenemia	NA
Core matrisome	ECM Glycoproteins	FGB	fibrinogen beta chain	3662	D6REL8:F8W6P4:P02675	NP_001171670.1:NP_005132.2	familial hypodysfibrinogenemia	NA
Core matrisome	ECM Glycoproteins	FGB	fibrinogen beta chain	3662	D6REL8:F8W6P4:P02675	NP_001171670.1:NP_005132.2	familial hypofibrinogenemia	NA
Core matrisome	ECM Glycoproteins	FGG	fibrinogen gamma chain	3694	C9JC84:C9JEU5:C9JPQ9:C9JU00:P02679	NP_000500.2:NP_068656.2	Dysfibrinogenaemia	p.ARG301CYS
Core matrisome	ECM Glycoproteins	FGG	fibrinogen gamma chain	3694	C9JC84:C9JEU5:C9JPQ9:C9JU00:P02679	NP_000500.2:NP_068656.2	Dysfibrinogenaemia	p.ARG301HIS
Core matrisome	ECM Glycoproteins	FGG	fibrinogen gamma chain	3694	C9JC84:C9JEU5:C9JPQ9:C9JU00:P02679	NP_000500.2:NP_068656.2	FIBRINOGEN OSAKA 5	p.ARG401TRP
Core matrisome	ECM Glycoproteins	FGG	fibrinogen gamma chain	3694	C9JC84:C9JEU5:C9JPQ9:C9JU00:P02679	NP_000500.2:NP_068656.2	Dysfibrinogenaemia	p.ASN334ILE
Core matrisome	ECM Glycoproteins	FGG	fibrinogen gamma chain	3694	C9JC84:C9JEU5:C9JPQ9:C9JU00:P02679	NP_000500.2:NP_068656.2	Dysfibrinogenaemia	p.ASP356TYR
Core matrisome	ECM Glycoproteins	FGG	fibrinogen gamma chain	3694	C9JC84:C9JEU5:C9JPQ9:C9JU00:P02679	NP_000500.2:NP_068656.2	Dysfibrinogenaemia	p.ASP356VAL
Core matrisome	ECM Glycoproteins	FGG	fibrinogen gamma chain	3694	C9JC84:C9JEU5:C9JPQ9:C9JU00:P02679	NP_000500.2:NP_068656.2	Dysfibrinogenaemia	p.ASP390HIS
Core matrisome	ECM Glycoproteins	FGG	fibrinogen gamma chain	3694	C9JC84:C9JEU5:C9JPQ9:C9JU00:P02679	NP_000500.2:NP_068656.2	Dysfibrinogenaemia	p.GLN355ARG
Core matrisome	ECM Glycoproteins	FGG	fibrinogen gamma chain	3694	C9JC84:C9JEU5:C9JPQ9:C9JU00:P02679	NP_000500.2:NP_068656.2	Fibrinogen milano xii, digenic	p.GLY191ARG
Core matrisome	ECM Glycoproteins	FGG	fibrinogen gamma chain	3694	C9JC84:C9JEU5:C9JPQ9:C9JU00:P02679	NP_000500.2:NP_068656.2	FIBRINOGEN GIESSEN 4	p.GLY318ARG
Core matrisome	ECM Glycoproteins	FGG	fibrinogen gamma chain	3694	C9JC84:C9JEU5:C9JPQ9:C9JU00:P02679	NP_000500.2:NP_068656.2	Dysfibrinogenaemia	p.GLY318VAL
Core matrisome	ECM Glycoproteins	FGG	fibrinogen gamma chain	3694	C9JC84:C9JEU5:C9JPQ9:C9JU00:P02679	NP_000500.2:NP_068656.2	Dysfibrinogenaemia	p.MET336THR
Core matrisome	ECM Glycoproteins	FGG	fibrinogen gamma chain	3694	C9JC84:C9JEU5:C9JPQ9:C9JU00:P02679	NP_000500.2:NP_068656.2	Dysfibrinogenemia, gamma type (3)	NA
Core matrisome	ECM Glycoproteins	FGG	fibrinogen gamma chain	3694	C9JC84:C9JEU5:C9JPQ9:C9JU00:P02679	NP_000500.2:NP_068656.2	Hypofibrinogenemia, gamma type (3)	NA
Core matrisome	ECM Glycoproteins	FGG	fibrinogen gamma chain	3694	C9JC84:C9JEU5:C9JPQ9:C9JU00:P02679	NP_000500.2:NP_068656.2	Thrombophilia, dysfibrinogenemic (3)	NA
Core matrisome	ECM Glycoproteins	FGG	fibrinogen gamma chain	3694	C9JC84:C9JEU5:C9JPQ9:C9JU00:P02679	NP_000500.2:NP_068656.2	congenital afibrinogenemia	NA
Core matrisome	ECM Glycoproteins	FGG	fibrinogen gamma chain	3694	C9JC84:C9JEU5:C9JPQ9:C9JU00:P02679	NP_000500.2:NP_068656.2	familial dysfibrinogenemia	NA
Core matrisome	ECM Glycoproteins	FGG	fibrinogen gamma chain	3694	C9JC84:C9JEU5:C9JPQ9:C9JU00:P02679	NP_000500.2:NP_068656.2	familial hypodysfibrinogenemia	NA
Core matrisome	ECM Glycoproteins	FGG	fibrinogen gamma chain	3694	C9JC84:C9JEU5:C9JPQ9:C9JU00:P02679	NP_000500.2:NP_068656.2	familial hypofibrinogenemia	NA
Core matrisome	ECM Glycoproteins	FN1	fibronectin 1	3778	F8W7G7:H0Y4K8:H0Y7Z1:P02751	NP_002017.1:NP_473375.2:NP_997639.1:NP_997641.1:NP_997643.1:NP_997647.1:XP_005246457.1:XP_005246463.1:XP_005246470.1:XP_005246472.1:XP_005246474.1	Glomerulopathy with fibronectin deposits 2	p.LEU1883ARG
Core matrisome	ECM Glycoproteins	FN1	fibronectin 1	3778	F8W7G7:H0Y4K8:H0Y7Z1:P02751	NP_002017.1:NP_473375.2:NP_997639.1:NP_997641.1:NP_997643.1:NP_997647.1:XP_005246457.1:XP_005246463.1:XP_005246470.1:XP_005246472.1:XP_005246474.1	Glomerulopathy with fibronectin deposits 2	p.TRP1834ARG
Core matrisome	ECM Glycoproteins	FN1	fibronectin 1	3778	F8W7G7:H0Y4K8:H0Y7Z1:P02751	NP_002017.1:NP_473375.2:NP_997639.1:NP_997641.1:NP_997643.1:NP_997647.1:XP_005246457.1:XP_005246463.1:XP_005246470.1:XP_005246472.1:XP_005246474.1	Glomerulopathy with fibronectin deposits	p.TYR973CYS
Core matrisome	ECM Glycoproteins	FRAS1	Fraser syndrome 1	19185	D6RCP6:H0Y8V2:H0Y930:H0Y9A6:H0Y9C9:Q86XX4	NP_001159605.1:NP_079350.5	Cryptophthalmos syndrome	p.GLN1267TER
Core matrisome	ECM Glycoproteins	FRAS1	Fraser syndrome 1	19185	D6RCP6:H0Y8V2:H0Y930:H0Y9A6:H0Y9C9:Q86XX4	NP_001159605.1:NP_079350.5	Cryptophthalmos syndrome	p.GLN2868TER
Core matrisome	ECM Glycoproteins	FRAS1	Fraser syndrome 1	19185	D6RCP6:H0Y8V2:H0Y930:H0Y9A6:H0Y9C9:Q86XX4	NP_001159605.1:NP_079350.5	Cryptophthalmos syndrome	p.GLN3005TER
Core matrisome	ECM Glycoproteins	FRAS1	Fraser syndrome 1	19185	D6RCP6:H0Y8V2:H0Y930:H0Y9A6:H0Y9C9:Q86XX4	NP_001159605.1:NP_079350.5	Cryptophthalmos syndrome	p.SER1424TER
Core matrisome	ECM Glycoproteins	FRAS1	Fraser syndrome 1	19185	D6RCP6:H0Y8V2:H0Y930:H0Y9A6:H0Y9C9:Q86XX4	NP_001159605.1:NP_079350.5	Fraser syndrome, 219000 (3)	NA
Core matrisome	ECM Glycoproteins	FRAS1	Fraser syndrome 1	19185	D6RCP6:H0Y8V2:H0Y930:H0Y9A6:H0Y9C9:Q86XX4	NP_001159605.1:NP_079350.5	Fraser syndrome	NA
Core matrisome	ECM Glycoproteins	FRAS1	Fraser syndrome 1	19185	D6RCP6:H0Y8V2:H0Y930:H0Y9A6:H0Y9C9:Q86XX4	NP_001159605.1:NP_079350.5	Fraser syndrome 1	NA
Core matrisome	ECM Glycoproteins	FRAS1	Fraser syndrome 1	19185	D6RCP6:H0Y8V2:H0Y930:H0Y9A6:H0Y9C9:Q86XX4	NP_001159605.1:NP_079350.5	renal agenesis, unilateral	NA
Core matrisome	ECM Glycoproteins	GLDN	gliomedin	29514	H0YM22:Q6ZMI3	NP_861454.2:XP_006720545.1:XP_006720546.1	lethal congenital contracture syndrome 11	NA
Core matrisome	ECM Glycoproteins	HMCN1	hemicentin 1	19194	Q5TCP6:Q96RW7	NP_114141.2	Macular degeneration, age-related, 1, 603075 (3)	NA
Core matrisome	ECM Glycoproteins	IGFALS	insulin-like growth factor binding protein, acid labile subunit	5468	H3BSX8:P35858	NP_001139478.1:NP_004961.1	Acid-labile subunit, deficiency of (3)	NA
Core matrisome	ECM Glycoproteins	IGFALS	insulin-like growth factor binding protein, acid labile subunit	5468	H3BSX8:P35858	NP_001139478.1:NP_004961.1	short stature due to primary acid-labile subunit deficiency	NA
Core matrisome	ECM Glycoproteins	IGFBP7	insulin-like growth factor binding protein 7	5476	Q16270	NP_001240764.1:NP_001544.1	familial retinal arterial macroaneurysm	NA
Core matrisome	ECM Glycoproteins	KAL1	Kallmann syndrome 1 sequence	6211	P23352	NP_000207.2	HYPOGONADOTROPIC HYPOGONADISM 1 WITH ANOSMIA	p.ARG257TER
Core matrisome	ECM Glycoproteins	KAL1	Kallmann syndrome 1 sequence	6211	P23352	NP_000207.2	HYPOGONADOTROPIC HYPOGONADISM 1 WITH ANOSMIA	p.ARG262TER
Core matrisome	ECM Glycoproteins	KAL1	Kallmann syndrome 1 sequence	6211	P23352	NP_000207.2	HYPOGONADOTROPIC HYPOGONADISM 1 WITH ANOSMIA	p.GLU514LYS
Core matrisome	ECM Glycoproteins	KAL1	Kallmann syndrome 1 sequence	6211	P23352	NP_000207.2	HYPOGONADOTROPIC HYPOGONADISM 1 WITH ANOSMIA	p.SER396LEU
Core matrisome	ECM Glycoproteins	KAL1	Kallmann syndrome 1 sequence	6211	P23352	NP_000207.2	HYPOGONADOTROPIC HYPOGONADISM 1 WITH ANOSMIA	p.TRP237TER
Core matrisome	ECM Glycoproteins	KAL1	Kallmann syndrome 1 sequence	6211	P23352	NP_000207.2	HYPOGONADOTROPIC HYPOGONADISM 1 WITH ANOSMIA	p.TRP258TER
Core matrisome	ECM Glycoproteins	KAL1	Kallmann syndrome 1 sequence	6211	P23352	NP_000207.2	Kallmann syndrome (3)	NA
Core matrisome	ECM Glycoproteins	LAMA1	laminin, alpha 1	6481	P25391	NP_005550.2	ataxia - intellectual disability - oculomotor apraxia - cerebellar cysts syndrome	NA
Core matrisome	ECM Glycoproteins	LAMA2	laminin, alpha 2	6482	P24043	NP_000417.2:NP_001073291.1	Congenital muscular dystrophy due to partial LAMA2 deficiency	p.ARG1549TER
Core matrisome	ECM Glycoproteins	LAMA2	laminin, alpha 2	6482	P24043	NP_000417.2:NP_001073291.1	Congenital muscular dystrophy due to partial LAMA2 deficiency	p.ARG2383TER
Core matrisome	ECM Glycoproteins	LAMA2	laminin, alpha 2	6482	P24043	NP_000417.2:NP_001073291.1	Merosin deficient congenital muscular dystrophy	p.ARG2578TER
Core matrisome	ECM Glycoproteins	LAMA2	laminin, alpha 2	6482	P24043	NP_000417.2:NP_001073291.1	Merosin deficient congenital muscular dystrophy	p.ARG3085TER
Core matrisome	ECM Glycoproteins	LAMA2	laminin, alpha 2	6482	P24043	NP_000417.2:NP_001073291.1	Congenital muscular dystrophy due to partial LAMA2 deficiency	p.CYS527TYR
Core matrisome	ECM Glycoproteins	LAMA2	laminin, alpha 2	6482	P24043	NP_000417.2:NP_001073291.1	Congenital muscular dystrophy due to partial LAMA2 deficiency	p.CYS862ARG
Core matrisome	ECM Glycoproteins	LAMA2	laminin, alpha 2	6482	P24043	NP_000417.2:NP_001073291.1	Merosin deficient congenital muscular dystrophy	p.CYS967TER
Core matrisome	ECM Glycoproteins	LAMA2	laminin, alpha 2	6482	P24043	NP_000417.2:NP_001073291.1	Merosin deficient congenital muscular dystrophy	p.GLN1240TER
Core matrisome	ECM Glycoproteins	LAMA2	laminin, alpha 2	6482	P24043	NP_000417.2:NP_001073291.1	Merosin deficient congenital muscular dystrophy	p.HIS2627GLN
Core matrisome	ECM Glycoproteins	LAMA2	laminin, alpha 2	6482	P24043	NP_000417.2:NP_001073291.1	Merosin deficient congenital muscular dystrophy	p.LEU2564PRO
Core matrisome	ECM Glycoproteins	LAMA2	laminin, alpha 2	6482	P24043	NP_000417.2:NP_001073291.1	Muscular dystrophy, congenital, due to partial LAMA2 deficiency, 607855 (3)	NA
Core matrisome	ECM Glycoproteins	LAMA2	laminin, alpha 2	6482	P24043	NP_000417.2:NP_001073291.1	Muscular dystrophy, congenital merosin-deficient, 607855 (3)	NA
Core matrisome	ECM Glycoproteins	LAMA2	laminin, alpha 2	6482	P24043	NP_000417.2:NP_001073291.1	congenital merosin-deficient muscular dystrophy 1A	NA
Core matrisome	ECM Glycoproteins	LAMA2	laminin, alpha 2	6482	P24043	NP_000417.2:NP_001073291.1	muscular dystrophy, limb-girdle, autosomal recessive 23	NA
Core matrisome	ECM Glycoproteins	LAMA3	laminin, alpha 3	6483	K7EIP4:K7EMU9:K7EPP3:K7EQ42:K7ERM0:Q16787	NP_000218.2:NP_001121189.1:NP_001121190.1:NP_937762.1	EPIDERMOLYSIS BULLOSA, JUNCTIONAL, HERLITZ TYPE	p.ARG650TER
Core matrisome	ECM Glycoproteins	LAMA3	laminin, alpha 3	6483	K7EIP4:K7EMU9:K7EPP3:K7EQ42:K7ERM0:Q16787	NP_000218.2:NP_001121189.1:NP_001121190.1:NP_937762.1	Epidermolysis bullosa, Herlitz	p.ARG661TER
Core matrisome	ECM Glycoproteins	LAMA3	laminin, alpha 3	6483	K7EIP4:K7EMU9:K7EPP3:K7EQ42:K7ERM0:Q16787	NP_000218.2:NP_001121189.1:NP_001121190.1:NP_937762.1	Adult junctional epidermolysis bullosa	p.GLN1379TER
Core matrisome	ECM Glycoproteins	LAMA3	laminin, alpha 3	6483	K7EIP4:K7EMU9:K7EPP3:K7EQ42:K7ERM0:Q16787	NP_000218.2:NP_001121189.1:NP_001121190.1:NP_937762.1	Epidermolysis bullosa, generalized atrophic benign, 226650 (3)	NA
Core matrisome	ECM Glycoproteins	LAMA3	laminin, alpha 3	6483	K7EIP4:K7EMU9:K7EPP3:K7EQ42:K7ERM0:Q16787	NP_000218.2:NP_001121189.1:NP_001121190.1:NP_937762.1	Epidermolysis bullosa, junctional, Herlitz type, 226700 (3)	NA
Core matrisome	ECM Glycoproteins	LAMA3	laminin, alpha 3	6483	K7EIP4:K7EMU9:K7EPP3:K7EQ42:K7ERM0:Q16787	NP_000218.2:NP_001121189.1:NP_001121190.1:NP_937762.1	Laryngoonychocutaneous syndrome, 245660 (3)	NA
Core matrisome	ECM Glycoproteins	LAMA3	laminin, alpha 3	6483	K7EIP4:K7EMU9:K7EPP3:K7EQ42:K7ERM0:Q16787	NP_000218.2:NP_001121189.1:NP_001121190.1:NP_937762.1	generalized junctional epidermolysis bullosa non-Herlitz type	NA
Core matrisome	ECM Glycoproteins	LAMA3	laminin, alpha 3	6483	K7EIP4:K7EMU9:K7EPP3:K7EQ42:K7ERM0:Q16787	NP_000218.2:NP_001121189.1:NP_001121190.1:NP_937762.1	junctional epidermolysis bullosa Herlitz type	NA
Core matrisome	ECM Glycoproteins	LAMA3	laminin, alpha 3	6483	K7EIP4:K7EMU9:K7EPP3:K7EQ42:K7ERM0:Q16787	NP_000218.2:NP_001121189.1:NP_001121190.1:NP_937762.1	junctional epidermolysis bullosa, non-Herlitz type	NA
Core matrisome	ECM Glycoproteins	LAMA3	laminin, alpha 3	6483	K7EIP4:K7EMU9:K7EPP3:K7EQ42:K7ERM0:Q16787	NP_000218.2:NP_001121189.1:NP_001121190.1:NP_937762.1	laryngo-onycho-cutaneous syndrome	NA
Core matrisome	ECM Glycoproteins	LAMA4	laminin, alpha 4	6484	E5RFD7:E5RFQ2:E5RHF3:E5RK79:H0Y351:H0YAP9:H0YAQ5:Q16363:Q6LET9	NP_001098676.2:NP_001098677.2:NP_001098678.1:NP_001098679.1:NP_002281.3	dilated cardiomyopathy 1JJ	NA
Core matrisome	ECM Glycoproteins	LAMA4	laminin, alpha 4	6484	E5RFD7:E5RFQ2:E5RHF3:E5RK79:H0Y351:H0YAP9:H0YAQ5:Q16363:Q6LET9	NP_001098676.2:NP_001098677.2:NP_001098678.1:NP_001098679.1:NP_002281.3	familial isolated dilated cardiomyopathy	NA
Core matrisome	ECM Glycoproteins	LAMB1	laminin, beta 1	6486	C9J296:E7EPA6:E9PCS6:G3XAI2:P07942	NP_002282.2	cobblestone lissencephaly without muscular or ocular involvement	NA
Core matrisome	ECM Glycoproteins	LAMB2	laminin, beta 2 (laminin S)	6487	F5H520:P55268	NP_002283.3:XP_005265184.1	Nephrotic syndrome	p.ARG246GLN
Core matrisome	ECM Glycoproteins	LAMB2	laminin, beta 2 (laminin S)	6487	F5H520:P55268	NP_002283.3:XP_005265184.1	NEPHROTIC SYNDROME, TYPE 5, WITH OCULAR ABNORMALITIES	p.ASN1380LYS
Core matrisome	ECM Glycoproteins	LAMB2	laminin, beta 2 (laminin S)	6487	F5H520:P55268	NP_002283.3:XP_005265184.1	Nephrotic syndrome	p.CYS321ARG
Core matrisome	ECM Glycoproteins	LAMB2	laminin, beta 2 (laminin S)	6487	F5H520:P55268	NP_002283.3:XP_005265184.1	Nephrotic syndrome	p.LEU1393PHE
Core matrisome	ECM Glycoproteins	LAMB2	laminin, beta 2 (laminin S)	6487	F5H520:P55268	NP_002283.3:XP_005265184.1	Microcoria-congenital nephrosis syndrome, 609049 (3)	NA
Core matrisome	ECM Glycoproteins	LAMB2	laminin, beta 2 (laminin S)	6487	F5H520:P55268	NP_002283.3:XP_005265184.1	LAMB2-related infantile-onset nephrotic syndrome	NA
Core matrisome	ECM Glycoproteins	LAMB2	laminin, beta 2 (laminin S)	6487	F5H520:P55268	NP_002283.3:XP_005265184.1	Pierson syndrome	NA
Core matrisome	ECM Glycoproteins	LAMB2	laminin, beta 2 (laminin S)	6487	F5H520:P55268	NP_002283.3:XP_005265184.1	synaptic congenital myasthenic syndrome	NA
Core matrisome	ECM Glycoproteins	LAMB3	laminin, beta 3	6490	Q13751:Q5THA1:X1WI29	NP_000219.2:NP_001017402.1:NP_001121113.1:XP_005273181.1	Epidermolysis bullosa, junctional	p.ARG42TER
Core matrisome	ECM Glycoproteins	LAMB3	laminin, beta 3	6490	Q13751:Q5THA1:X1WI29	NP_000219.2:NP_001017402.1:NP_001121113.1:XP_005273181.1	Epidermolysis bullosa, Herlitz	p.ARG635TER
Core matrisome	ECM Glycoproteins	LAMB3	laminin, beta 3	6490	Q13751:Q5THA1:X1WI29	NP_000219.2:NP_001017402.1:NP_001121113.1:XP_005273181.1	Epidermolysis bullosa, Herlitz	p.GLN166TER
Core matrisome	ECM Glycoproteins	LAMB3	laminin, beta 3	6490	Q13751:Q5THA1:X1WI29	NP_000219.2:NP_001017402.1:NP_001121113.1:XP_005273181.1	Epidermolysis bullosa, Herlitz	p.GLN243TER
Core matrisome	ECM Glycoproteins	LAMB3	laminin, beta 3	6490	Q13751:Q5THA1:X1WI29	NP_000219.2:NP_001017402.1:NP_001121113.1:XP_005273181.1	Epidermolysis bullosa, Herlitz	p.GLN936TER
Core matrisome	ECM Glycoproteins	LAMB3	laminin, beta 3	6490	Q13751:Q5THA1:X1WI29	NP_000219.2:NP_001017402.1:NP_001121113.1:XP_005273181.1	Adult junctional epidermolysis bullosa	p.GLU210LYS
Core matrisome	ECM Glycoproteins	LAMB3	laminin, beta 3	6490	Q13751:Q5THA1:X1WI29	NP_000219.2:NP_001017402.1:NP_001121113.1:XP_005273181.1	Epidermolysis bullosa, Herlitz	p.TRP610TER
Core matrisome	ECM Glycoproteins	LAMB3	laminin, beta 3	6490	Q13751:Q5THA1:X1WI29	NP_000219.2:NP_001017402.1:NP_001121113.1:XP_005273181.1	Epidermolysis bullosa, generalized atrophic benign, 226650 (3)	NA
Core matrisome	ECM Glycoproteins	LAMB3	laminin, beta 3	6490	Q13751:Q5THA1:X1WI29	NP_000219.2:NP_001017402.1:NP_001121113.1:XP_005273181.1	Epidermolysis bullosa, Herlitz junctional type, 226700 (3)	NA
Core matrisome	ECM Glycoproteins	LAMB3	laminin, beta 3	6490	Q13751:Q5THA1:X1WI29	NP_000219.2:NP_001017402.1:NP_001121113.1:XP_005273181.1	amelogenesis imperfecta type 1	NA
Core matrisome	ECM Glycoproteins	LAMB3	laminin, beta 3	6490	Q13751:Q5THA1:X1WI29	NP_000219.2:NP_001017402.1:NP_001121113.1:XP_005273181.1	amelogenesis imperfecta type 1A	NA
Core matrisome	ECM Glycoproteins	LAMB3	laminin, beta 3	6490	Q13751:Q5THA1:X1WI29	NP_000219.2:NP_001017402.1:NP_001121113.1:XP_005273181.1	generalized junctional epidermolysis bullosa non-Herlitz type	NA
Core matrisome	ECM Glycoproteins	LAMB3	laminin, beta 3	6490	Q13751:Q5THA1:X1WI29	NP_000219.2:NP_001017402.1:NP_001121113.1:XP_005273181.1	junctional epidermolysis bullosa Herlitz type	NA
Core matrisome	ECM Glycoproteins	LAMB3	laminin, beta 3	6490	Q13751:Q5THA1:X1WI29	NP_000219.2:NP_001017402.1:NP_001121113.1:XP_005273181.1	junctional epidermolysis bullosa, non-Herlitz type	NA
Core matrisome	ECM Glycoproteins	LAMC2	laminin, gamma 2	6493	Q13753	NP_005553.2:NP_061486.2	Adult junctional epidermolysis bullosa	p.ARG245TER
Core matrisome	ECM Glycoproteins	LAMC2	laminin, gamma 2	6493	Q13753	NP_005553.2:NP_061486.2	Epidermolysis bullosa, Herlitz	p.ARG95TER
Core matrisome	ECM Glycoproteins	LAMC2	laminin, gamma 2	6493	Q13753	NP_005553.2:NP_061486.2	Epidermolysis bullosa, Herlitz	p.CYS553TER
Core matrisome	ECM Glycoproteins	LAMC2	laminin, gamma 2	6493	Q13753	NP_005553.2:NP_061486.2	Epidermolysis bullosa, Herlitz	p.TYR355TER
Core matrisome	ECM Glycoproteins	LAMC2	laminin, gamma 2	6493	Q13753	NP_005553.2:NP_061486.2	Epidermolysis bullosa, generalized atrophic benign, 226650 (3)	NA
Core matrisome	ECM Glycoproteins	LAMC2	laminin, gamma 2	6493	Q13753	NP_005553.2:NP_061486.2	Epidermolysis bullosa, Herlitz junctional type, 226700 (3)	NA
Core matrisome	ECM Glycoproteins	LAMC2	laminin, gamma 2	6493	Q13753	NP_005553.2:NP_061486.2	generalized junctional epidermolysis bullosa non-Herlitz type	NA
Core matrisome	ECM Glycoproteins	LAMC2	laminin, gamma 2	6493	Q13753	NP_005553.2:NP_061486.2	junctional epidermolysis bullosa Herlitz type	NA
Core matrisome	ECM Glycoproteins	LAMC2	laminin, gamma 2	6493	Q13753	NP_005553.2:NP_061486.2	junctional epidermolysis bullosa, non-Herlitz type	NA
Core matrisome	ECM Glycoproteins	LAMC3	laminin, gamma 3	6494	H7BY04:Q5JTC4:Q9Y6N6	NP_006050.3	occipital pachygyria and polymicrogyria	NA
Core matrisome	ECM Glycoproteins	LGI1	leucine-rich, glioma inactivated 1	6572	O95970	NP_005088.1:XP_005270329.1	ETL1	p.ARG136TRP
Core matrisome	ECM Glycoproteins	LGI1	leucine-rich, glioma inactivated 1	6572	O95970	NP_005088.1:XP_005270329.1	ETL1	p.CYS46ARG
Core matrisome	ECM Glycoproteins	LGI1	leucine-rich, glioma inactivated 1	6572	O95970	NP_005088.1:XP_005270329.1	ETL1	p.GLU383ALA
Core matrisome	ECM Glycoproteins	LGI1	leucine-rich, glioma inactivated 1	6572	O95970	NP_005088.1:XP_005270329.1	ETL1	p.PHE318CYS
Core matrisome	ECM Glycoproteins	LGI1	leucine-rich, glioma inactivated 1	6572	O95970	NP_005088.1:XP_005270329.1	Epilepsy, partial, with auditory features, 600512 (3)	NA
Core matrisome	ECM Glycoproteins	LGI1	leucine-rich, glioma inactivated 1	6572	O95970	NP_005088.1:XP_005270329.1	Glioblastoma, somatic, 137800 (3)	NA
Core matrisome	ECM Glycoproteins	LGI1	leucine-rich, glioma inactivated 1	6572	O95970	NP_005088.1:XP_005270329.1	familial temporal lobe epilepsy 1	NA
Core matrisome	ECM Glycoproteins	LGI4	leucine-rich repeat LGI family, member 4	18712	A8MVC2:K7ENQ0:Q8N135	NP_644813.1	arthrogryposis multiplex congenita, neurogenic, with myelin defect	NA
Core matrisome	ECM Glycoproteins	LGI4	leucine-rich repeat LGI family, member 4	18712	A8MVC2:K7ENQ0:Q8N135	NP_644813.1	hypomyelination neuropathy-arthrogryposis syndrome	NA
Core matrisome	ECM Glycoproteins	LTBP2	latent transforming growth factor beta binding protein 2	6715	G3V254:G3V3X5:G3V511:H0YJ20:Q14767	NP_000419.1	GLAUCOMA 3, PRIMARY CONGENITAL, D	p.ARG299TER
Core matrisome	ECM Glycoproteins	LTBP2	latent transforming growth factor beta binding protein 2	6715	G3V254:G3V3X5:G3V511:H0YJ20:Q14767	NP_000419.1	Primary open angle glaucoma	p.ARG495GLN
Core matrisome	ECM Glycoproteins	LTBP2	latent transforming growth factor beta binding protein 2	6715	G3V254:G3V3X5:G3V511:H0YJ20:Q14767	NP_000419.1	Marfan syndrome	p.ARG548TER
Core matrisome	ECM Glycoproteins	LTBP2	latent transforming growth factor beta binding protein 2	6715	G3V254:G3V3X5:G3V511:H0YJ20:Q14767	NP_000419.1	Glaucoma 3, primary congenital, d	p.GLN111TER
Core matrisome	ECM Glycoproteins	LTBP2	latent transforming growth factor beta binding protein 2	6715	G3V254:G3V3X5:G3V511:H0YJ20:Q14767	NP_000419.1	Primary open angle glaucoma	p.GLN1417ARG
Core matrisome	ECM Glycoproteins	LTBP2	latent transforming growth factor beta binding protein 2	6715	G3V254:G3V3X5:G3V511:H0YJ20:Q14767	NP_000419.1	Primary open angle glaucoma	p.GLU1191LYS
Core matrisome	ECM Glycoproteins	LTBP2	latent transforming growth factor beta binding protein 2	6715	G3V254:G3V3X5:G3V511:H0YJ20:Q14767	NP_000419.1	Pseudoexfoliation glaucoma	p.ILE667LEU
Core matrisome	ECM Glycoproteins	LTBP2	latent transforming growth factor beta binding protein 2	6715	G3V254:G3V3X5:G3V511:H0YJ20:Q14767	NP_000419.1	Pseudoexfoliation glaucoma	p.MET1567VAL
Core matrisome	ECM Glycoproteins	LTBP2	latent transforming growth factor beta binding protein 2	6715	G3V254:G3V3X5:G3V511:H0YJ20:Q14767	NP_000419.1	Pseudoexfoliation glaucoma	p.PRO432LEU
Core matrisome	ECM Glycoproteins	LTBP2	latent transforming growth factor beta binding protein 2	6715	G3V254:G3V3X5:G3V511:H0YJ20:Q14767	NP_000419.1	Primary open angle glaucoma	p.VAL1638MET
Core matrisome	ECM Glycoproteins	LTBP2	latent transforming growth factor beta binding protein 2	6715	G3V254:G3V3X5:G3V511:H0YJ20:Q14767	NP_000419.1	congenital glaucoma	NA
Core matrisome	ECM Glycoproteins	LTBP2	latent transforming growth factor beta binding protein 2	6715	G3V254:G3V3X5:G3V511:H0YJ20:Q14767	NP_000419.1	glaucoma 3, primary congenital, d	NA
Core matrisome	ECM Glycoproteins	LTBP2	latent transforming growth factor beta binding protein 2	6715	G3V254:G3V3X5:G3V511:H0YJ20:Q14767	NP_000419.1	glaucoma secondary to spherophakia/ectopia lentis and megalocornea	NA
Core matrisome	ECM Glycoproteins	LTBP2	latent transforming growth factor beta binding protein 2	6715	G3V254:G3V3X5:G3V511:H0YJ20:Q14767	NP_000419.1	microspherophakia and/or megalocornea, with ectopia lentis and with or without secondary glaucoma	NA
Core matrisome	ECM Glycoproteins	LTBP2	latent transforming growth factor beta binding protein 2	6715	G3V254:G3V3X5:G3V511:H0YJ20:Q14767	NP_000419.1	Weill-Marchesani syndrome	NA
Core matrisome	ECM Glycoproteins	LTBP3	latent transforming growth factor beta binding protein 3	6716	E9PJR2:E9PKW1:E9PPT7:E9PQR0:E9PR75:E9PR84:E9PRF2:F5GWC4:H0YC99:H0YCQ2:H0YCX6:H0YE75:Q9NS15	NP_001123616.1:NP_001157738.1:NP_066548.2	Oligodontia	p.TYR774TER
Core matrisome	ECM Glycoproteins	LTBP3	latent transforming growth factor beta binding protein 3	6716	E9PJR2:E9PKW1:E9PPT7:E9PQR0:E9PR75:E9PR84:E9PRF2:F5GWC4:H0YC99:H0YCQ2:H0YCX6:H0YE75:Q9NS15	NP_001123616.1:NP_001157738.1:NP_066548.2	acromicric dysplasia	NA
Core matrisome	ECM Glycoproteins	LTBP3	latent transforming growth factor beta binding protein 3	6716	E9PJR2:E9PKW1:E9PPT7:E9PQR0:E9PR75:E9PR84:E9PRF2:F5GWC4:H0YC99:H0YCQ2:H0YCX6:H0YE75:Q9NS15	NP_001123616.1:NP_001157738.1:NP_066548.2	brachyolmia-amelogenesis imperfecta syndrome	NA
Core matrisome	ECM Glycoproteins	LTBP3	latent transforming growth factor beta binding protein 3	6716	E9PJR2:E9PKW1:E9PPT7:E9PQR0:E9PR75:E9PR84:E9PRF2:F5GWC4:H0YC99:H0YCQ2:H0YCX6:H0YE75:Q9NS15	NP_001123616.1:NP_001157738.1:NP_066548.2	geleophysic dysplasia	NA
Core matrisome	ECM Glycoproteins	LTBP3	latent transforming growth factor beta binding protein 3	6716	E9PJR2:E9PKW1:E9PPT7:E9PQR0:E9PR75:E9PR84:E9PRF2:F5GWC4:H0YC99:H0YCQ2:H0YCX6:H0YE75:Q9NS15	NP_001123616.1:NP_001157738.1:NP_066548.2	geleophysic dysplasia 3	NA
Core matrisome	ECM Glycoproteins	LTBP4	latent transforming growth factor beta binding protein 4	6717	E7ENG9:E7EUU1:F5GXC9:F8WAA0:M0QXV3:M0QYE9:M0QZX0:M0R351:Q8N2S1	NP_001036009.1:NP_001036010.1:NP_003564.2	Cutis laxa with severe pulmonary, gastrointestinal, and urinary abnormalities	p.CYS311GLY
Core matrisome	ECM Glycoproteins	LTBP4	latent transforming growth factor beta binding protein 4	6717	E7ENG9:E7EUU1:F5GXC9:F8WAA0:M0QXV3:M0QYE9:M0QZX0:M0R351:Q8N2S1	NP_001036009.1:NP_001036010.1:NP_003564.2	Cutis laxa with severe pulmonary, gastrointestinal, and urinary abnormalities	p.CYS857TER
Core matrisome	ECM Glycoproteins	LTBP4	latent transforming growth factor beta binding protein 4	6717	E7ENG9:E7EUU1:F5GXC9:F8WAA0:M0QXV3:M0QYE9:M0QZX0:M0R351:Q8N2S1	NP_001036009.1:NP_001036010.1:NP_003564.2	cutis laxa with severe pulmonary, gastrointestinal and urinary anomalies	NA
Core matrisome	ECM Glycoproteins	MATN3	matrilin 3	6909	O15232	NP_002372.1	EPIPHYSEAL DYSPLASIA, MULTIPLE, 5	p.ALA128PRO
Core matrisome	ECM Glycoproteins	MATN3	matrilin 3	6909	O15232	NP_002372.1	EPIPHYSEAL DYSPLASIA, MULTIPLE, 5	p.ALA219ASP
Core matrisome	ECM Glycoproteins	MATN3	matrilin 3	6909	O15232	NP_002372.1	EPIPHYSEAL DYSPLASIA, MULTIPLE, 5	p.ARG121TRP
Core matrisome	ECM Glycoproteins	MATN3	matrilin 3	6909	O15232	NP_002372.1	EPIPHYSEAL DYSPLASIA, MULTIPLE, 5	p.ARG70HIS
Core matrisome	ECM Glycoproteins	MATN3	matrilin 3	6909	O15232	NP_002372.1	Osteoarthritis of distal interphalangeal joint	p.THR303MET
Core matrisome	ECM Glycoproteins	MATN3	matrilin 3	6909	O15232	NP_002372.1	EPIPHYSEAL DYSPLASIA, MULTIPLE, 5	p.VAL194ASP
Core matrisome	ECM Glycoproteins	MATN3	matrilin 3	6909	O15232	NP_002372.1	Epiphyseal dysplasia, multiple, 5, 607078 (3)	NA
Core matrisome	ECM Glycoproteins	MATN3	matrilin 3	6909	O15232	NP_002372.1	Osteoarthritis, hand, susceptibility to, 607850 (3)	NA
Core matrisome	ECM Glycoproteins	MATN3	matrilin 3	6909	O15232	NP_002372.1	Spondyloepimetaphyseal dysplasia, 608728 (3)	NA
Core matrisome	ECM Glycoproteins	MATN3	matrilin 3	6909	O15232	NP_002372.1	multiple epiphyseal dysplasia type 5	NA
Core matrisome	ECM Glycoproteins	MATN3	matrilin 3	6909	O15232	NP_002372.1	spondyloepimetaphyseal dysplasia, matrilin-3 type	NA
Core matrisome	ECM Glycoproteins	MFAP5	microfibrillar associated protein 5	29673	B3KW70:F5GYX4:F5H1C0:F5H2W4:F5H413:F5H7Z2:H0YG03:H0YGS3:Q13361:Q7Z490	NP_003471.1:XP_005253542.1	aortic aneurysm, familial thoracic 9	NA
Core matrisome	ECM Glycoproteins	MFAP5	microfibrillar associated protein 5	29673	B3KW70:F5GYX4:F5H1C0:F5H2W4:F5H413:F5H7Z2:H0YG03:H0YGS3:Q13361:Q7Z490	NP_003471.1:XP_005253542.1	familial thoracic aortic aneurysm and aortic dissection	NA
Core matrisome	ECM Glycoproteins	MGP	matrix Gla protein	7060	H0YGZ6:P08493	NP_000891.2:NP_001177768.1	Keutel syndrome, 245150 (3)	NA
Core matrisome	ECM Glycoproteins	MGP	matrix Gla protein	7060	H0YGZ6:P08493	NP_000891.2:NP_001177768.1	Keutel syndrome	NA
Core matrisome	ECM Glycoproteins	NID1	nidogen 1	7821	P14543	NP_002499.2	Dandy-Walker syndrome	NA
Core matrisome	ECM Glycoproteins	NTN1	netrin 1	8029	H7BZF4:O95631	NP_004813.2:XP_006721658.1	familial congenital mirror movements	NA
Core matrisome	ECM Glycoproteins	NTNG1	netrin G1	23319	A6NK56:B4DKF0:F5GYT0:F8WEB5:Q9Y2I2	NP_001106697.1:NP_001106699.1:NP_055732.2:XP_006710519.1	atypical Rett syndrome	NA
Core matrisome	ECM Glycoproteins	OTOG	otogelin	8516	C9IZ84:H9KVB3:Q6ZRI0	NP_001264198.1	autosomal recessive nonsyndromic deafness	NA
Core matrisome	ECM Glycoproteins	OTOG	otogelin	8516	C9IZ84:H9KVB3:Q6ZRI0	NP_001264198.1	autosomal recessive nonsyndromic deafness 18B	NA
Core matrisome	ECM Glycoproteins	PXDN	peroxidasin homolog (Drosophila)	14966	C9J4I9:H7C1W1:H7C300:H7C3W2:Q92626	NP_036425.1	anterior segment dysgenesis 7	NA
Core matrisome	ECM Glycoproteins	RELN	reelin	9957	H7C2B0:J3KQ66:P78509	NP_005036.2:NP_774959.1	Lissencephaly syndrome, Norman-Roberts type, 257320 (3)	NA
Core matrisome	ECM Glycoproteins	RELN	reelin	9957	H7C2B0:J3KQ66:P78509	NP_005036.2:NP_774959.1	familial temporal lobe epilepsy 1	NA
Core matrisome	ECM Glycoproteins	RELN	reelin	9957	H7C2B0:J3KQ66:P78509	NP_005036.2:NP_774959.1	Norman-Roberts syndrome	NA
Core matrisome	ECM Glycoproteins	RSPO1	R-spondin homolog (Xenopus laevis)	21679	Q2MKA7	NP_001033722.1:NP_001229837.1:NP_001229838.1:NP_001229839.1:XP_006710646.1	palmoplantar keratoderma-XX sex reversal-predisposition to squamous cell carcinoma syndrome	NA
Core matrisome	ECM Glycoproteins	RSPO2	R-spondin 2 homolog (Xenopus laevis)	28583	E5RGU9:E5RH25:E5RHC3:E5RJA2:E5RJU7:Q6UXX9	NP_001269792.1:NP_848660.3:XP_005250963.1	tetraamelia syndrome 2	NA
Core matrisome	ECM Glycoproteins	RSPO2	R-spondin 2 homolog (Xenopus laevis)	28583	E5RGU9:E5RH25:E5RHC3:E5RJA2:E5RJU7:Q6UXX9	NP_001269792.1:NP_848660.3:XP_005250963.1	tetraamelia-multiple malformations syndrome	NA
Core matrisome	ECM Glycoproteins	RSPO4	R-spondin family, member 4	16175	Q2I0M5	NP_001025042.2:NP_001035096.1	nonsyndromic congenital nail disorder 4	NA
Core matrisome	ECM Glycoproteins	SMOC1	SPARC related modular calcium binding 1	20318	Q9H4F8	NP_001030024.1:NP_071420.1	microphthalmia with limb anomalies	NA
Core matrisome	ECM Glycoproteins	SMOC2	SPARC related modular calcium binding 2	20323	H0Y3J4:H0Y5I1:Q9H3U7	NP_001159884.1:NP_071421.1	atypical dentin dysplasia due to SMOC2 deficiency	NA
Core matrisome	ECM Glycoproteins	SMOC2	SPARC related modular calcium binding 2	20323	H0Y3J4:H0Y5I1:Q9H3U7	NP_001159884.1:NP_071421.1	dentin dysplasia type I	NA
Core matrisome	ECM Glycoproteins	SPARC	secreted protein, acidic, cysteine-rich (osteonectin)	11219	E5RJA5:E5RK62:F5GY03:F5H4E2:P09486	NP_003109.1	osteogenesis imperfecta type 17	NA
Core matrisome	ECM Glycoproteins	SPARC	secreted protein, acidic, cysteine-rich (osteonectin)	11219	E5RJA5:E5RK62:F5GY03:F5H4E2:P09486	NP_003109.1	osteogenesis imperfecta type 4	NA
Core matrisome	ECM Glycoproteins	SRPX2	sushi-repeat-containing protein, X-linked 2	30668	O60687	NP_055282.1:XP_005262178.1	RESDX	p.ASN327SER
Core matrisome	ECM Glycoproteins	SRPX2	sushi-repeat-containing protein, X-linked 2	30668	O60687	NP_055282.1:XP_005262178.1	BPP	p.TYR72SER
Core matrisome	ECM Glycoproteins	SRPX2	sushi-repeat-containing protein, X-linked 2	30668	O60687	NP_055282.1:XP_005262178.1	rolandic epilepsy-speech dyspraxia syndrome	NA
Core matrisome	ECM Glycoproteins	TECTA	tectorin alpha	11720	O75443	NP_005413.2	DFNA12	p.ARG1890CYS
Core matrisome	ECM Glycoproteins	TECTA	tectorin alpha	11720	O75443	NP_005413.2	Deafness	p.ARG2021HIS
Core matrisome	ECM Glycoproteins	TECTA	tectorin alpha	11720	O75443	NP_005413.2	Deafness	p.CYS1837ARG
Core matrisome	ECM Glycoproteins	TECTA	tectorin alpha	11720	O75443	NP_005413.2	DFNA12	p.TYR1870CYS
Core matrisome	ECM Glycoproteins	TECTA	tectorin alpha	11720	O75443	NP_005413.2	Deafness, autosomal dominant 12, 601842 (3)	NA
Core matrisome	ECM Glycoproteins	TECTA	tectorin alpha	11720	O75443	NP_005413.2	Deafness, autosomal dominant 8, 601543 (3)	NA
Core matrisome	ECM Glycoproteins	TECTA	tectorin alpha	11720	O75443	NP_005413.2	Deafness, autosomal recessive 21, 603629 (3)	NA
Core matrisome	ECM Glycoproteins	TECTA	tectorin alpha	11720	O75443	NP_005413.2	autosomal dominant nonsyndromic deafness	NA
Core matrisome	ECM Glycoproteins	TECTA	tectorin alpha	11720	O75443	NP_005413.2	autosomal dominant nonsyndromic deafness 12	NA
Core matrisome	ECM Glycoproteins	TECTA	tectorin alpha	11720	O75443	NP_005413.2	autosomal recessive nonsyndromic deafness	NA
Core matrisome	ECM Glycoproteins	TECTA	tectorin alpha	11720	O75443	NP_005413.2	autosomal recessive nonsyndromic deafness 21	NA
Core matrisome	ECM Glycoproteins	TGFBI	transforming growth factor, beta-induced, 68kDa	11771	D6RBX4:G8JLA8:H0Y8L3:H0Y8M8:H0Y9D7:H0YAB8:H0YAH8:Q15582:S4R3C6	NP_000349.1	CDL1	p.ALA546ASP
Core matrisome	ECM Glycoproteins	TGFBI	transforming growth factor, beta-induced, 68kDa	11771	D6RBX4:G8JLA8:H0Y8L3:H0Y8M8:H0Y9D7:H0YAB8:H0YAH8:Q15582:S4R3C6	NP_000349.1	ACD	p.ARG124HIS
Core matrisome	ECM Glycoproteins	TGFBI	transforming growth factor, beta-induced, 68kDa	11771	D6RBX4:G8JLA8:H0Y8L3:H0Y8M8:H0Y9D7:H0YAB8:H0YAH8:Q15582:S4R3C6	NP_000349.1	CDGG1	p.ARG124SER
Core matrisome	ECM Glycoproteins	TGFBI	transforming growth factor, beta-induced, 68kDa	11771	D6RBX4:G8JLA8:H0Y8L3:H0Y8M8:H0Y9D7:H0YAB8:H0YAH8:Q15582:S4R3C6	NP_000349.1	CDTB	p.ARG555GLN
Core matrisome	ECM Glycoproteins	TGFBI	transforming growth factor, beta-induced, 68kDa	11771	D6RBX4:G8JLA8:H0Y8L3:H0Y8M8:H0Y9D7:H0YAB8:H0YAH8:Q15582:S4R3C6	NP_000349.1	CORNEAL DYSTROPHY, EPITHELIAL BASEMENT MEMBRANE	p.ARG666SER
Core matrisome	ECM Glycoproteins	TGFBI	transforming growth factor, beta-induced, 68kDa	11771	D6RBX4:G8JLA8:H0Y8L3:H0Y8M8:H0Y9D7:H0YAB8:H0YAH8:Q15582:S4R3C6	NP_000349.1	CDL1	p.GLY623ASP
Core matrisome	ECM Glycoproteins	TGFBI	transforming growth factor, beta-induced, 68kDa	11771	D6RBX4:G8JLA8:H0Y8L3:H0Y8M8:H0Y9D7:H0YAB8:H0YAH8:Q15582:S4R3C6	NP_000349.1	CORNEAL DYSTROPHY, EPITHELIAL BASEMENT MEMBRANE	p.LEU509ARG
Core matrisome	ECM Glycoproteins	TGFBI	transforming growth factor, beta-induced, 68kDa	11771	D6RBX4:G8JLA8:H0Y8L3:H0Y8M8:H0Y9D7:H0YAB8:H0YAH8:Q15582:S4R3C6	NP_000349.1	CDL1	p.PRO551GLN
Core matrisome	ECM Glycoproteins	TGFBI	transforming growth factor, beta-induced, 68kDa	11771	D6RBX4:G8JLA8:H0Y8L3:H0Y8M8:H0Y9D7:H0YAB8:H0YAH8:Q15582:S4R3C6	NP_000349.1	Corneal dystrophy, Avellino type, 607541 (3)	NA
Core matrisome	ECM Glycoproteins	TGFBI	transforming growth factor, beta-induced, 68kDa	11771	D6RBX4:G8JLA8:H0Y8L3:H0Y8M8:H0Y9D7:H0YAB8:H0YAH8:Q15582:S4R3C6	NP_000349.1	Corneal dystrophy, Groenouw type I, 121900 (3)	NA
Core matrisome	ECM Glycoproteins	TGFBI	transforming growth factor, beta-induced, 68kDa	11771	D6RBX4:G8JLA8:H0Y8L3:H0Y8M8:H0Y9D7:H0YAB8:H0YAH8:Q15582:S4R3C6	NP_000349.1	Corneal dystrophy, lattice type I, 122200 (3)	NA
Core matrisome	ECM Glycoproteins	TGFBI	transforming growth factor, beta-induced, 68kDa	11771	D6RBX4:G8JLA8:H0Y8L3:H0Y8M8:H0Y9D7:H0YAB8:H0YAH8:Q15582:S4R3C6	NP_000349.1	Corneal dystrophy, lattice type IIIA, 608471 (3)	NA
Core matrisome	ECM Glycoproteins	TGFBI	transforming growth factor, beta-induced, 68kDa	11771	D6RBX4:G8JLA8:H0Y8L3:H0Y8M8:H0Y9D7:H0YAB8:H0YAH8:Q15582:S4R3C6	NP_000349.1	Corneal dystrophy, Reis-Bucklers type, 608470 (3)	NA
Core matrisome	ECM Glycoproteins	TGFBI	transforming growth factor, beta-induced, 68kDa	11771	D6RBX4:G8JLA8:H0Y8L3:H0Y8M8:H0Y9D7:H0YAB8:H0YAH8:Q15582:S4R3C6	NP_000349.1	Corneal dystrophy, Thiel-Behnke type, 602082 (3)	NA
Core matrisome	ECM Glycoproteins	TGFBI	transforming growth factor, beta-induced, 68kDa	11771	D6RBX4:G8JLA8:H0Y8L3:H0Y8M8:H0Y9D7:H0YAB8:H0YAH8:Q15582:S4R3C6	NP_000349.1	corneal dystrophy, lattice type 3A	NA
Core matrisome	ECM Glycoproteins	TGFBI	transforming growth factor, beta-induced, 68kDa	11771	D6RBX4:G8JLA8:H0Y8L3:H0Y8M8:H0Y9D7:H0YAB8:H0YAH8:Q15582:S4R3C6	NP_000349.1	epithelial basement membrane dystrophy	NA
Core matrisome	ECM Glycoproteins	TGFBI	transforming growth factor, beta-induced, 68kDa	11771	D6RBX4:G8JLA8:H0Y8L3:H0Y8M8:H0Y9D7:H0YAB8:H0YAH8:Q15582:S4R3C6	NP_000349.1	granular corneal dystrophy type I	NA
Core matrisome	ECM Glycoproteins	TGFBI	transforming growth factor, beta-induced, 68kDa	11771	D6RBX4:G8JLA8:H0Y8L3:H0Y8M8:H0Y9D7:H0YAB8:H0YAH8:Q15582:S4R3C6	NP_000349.1	granular corneal dystrophy type II	NA
Core matrisome	ECM Glycoproteins	TGFBI	transforming growth factor, beta-induced, 68kDa	11771	D6RBX4:G8JLA8:H0Y8L3:H0Y8M8:H0Y9D7:H0YAB8:H0YAH8:Q15582:S4R3C6	NP_000349.1	lattice corneal dystrophy type I	NA
Core matrisome	ECM Glycoproteins	TGFBI	transforming growth factor, beta-induced, 68kDa	11771	D6RBX4:G8JLA8:H0Y8L3:H0Y8M8:H0Y9D7:H0YAB8:H0YAH8:Q15582:S4R3C6	NP_000349.1	Reis-Bucklers corneal dystrophy	NA
Core matrisome	ECM Glycoproteins	TGFBI	transforming growth factor, beta-induced, 68kDa	11771	D6RBX4:G8JLA8:H0Y8L3:H0Y8M8:H0Y9D7:H0YAB8:H0YAH8:Q15582:S4R3C6	NP_000349.1	Thiel-Behnke corneal dystrophy	NA
Core matrisome	ECM Glycoproteins	TNC	tenascin C	5318	E9PC84:F5H5D6:F5H7V9:H0YGZ3:J3QSU6:P24821	NP_002151.2:XP_005252029.1:XP_005252031.1:XP_005252032.1:XP_006717161.1:XP_006717163.1	autosomal dominant nonsyndromic deafness	NA
Core matrisome	ECM Glycoproteins	TNC	tenascin C	5318	E9PC84:F5H5D6:F5H7V9:H0YGZ3:J3QSU6:P24821	NP_002151.2:XP_005252029.1:XP_005252031.1:XP_005252032.1:XP_006717161.1:XP_006717163.1	autosomal dominant nonsyndromic deafness 56	NA
Core matrisome	ECM Glycoproteins	TNXB	tenascin XB	11976	C9J7W4:E7EPZ9:P22105	NP_061978.6:NP_115859.2	Ehlers-Danlos syndrome, type 3	p.VAL1108MET
Core matrisome	ECM Glycoproteins	TNXB	tenascin XB	11976	C9J7W4:E7EPZ9:P22105	NP_061978.6:NP_115859.2	Ehlers-Danlos due to tenascin X deficiency, 606408 (3)	NA
Core matrisome	ECM Glycoproteins	TNXB	tenascin XB	11976	C9J7W4:E7EPZ9:P22105	NP_061978.6:NP_115859.2	Ehlers-Danlos syndrome, hypermobility type, 130020 (3)	NA
Core matrisome	ECM Glycoproteins	TNXB	tenascin XB	11976	C9J7W4:E7EPZ9:P22105	NP_061978.6:NP_115859.2	Ehlers-Danlos syndrome due to tenascin-X deficiency	NA
Core matrisome	ECM Glycoproteins	TNXB	tenascin XB	11976	C9J7W4:E7EPZ9:P22105	NP_061978.6:NP_115859.2	familial vesicoureteral reflux	NA
Core matrisome	ECM Glycoproteins	TNXB	tenascin XB	11976	C9J7W4:E7EPZ9:P22105	NP_061978.6:NP_115859.2	vesicoureteral reflux 8	NA
Core matrisome	ECM Glycoproteins	TSPEAR	chromosome 21 open reading frame 29	1268	A8MW19:Q8WU66	NP_001258966.1:NP_659428.2:XP_005261214.1	autosomal recessive nonsyndromic deafness	NA
Core matrisome	ECM Glycoproteins	VWF	von Willebrand factor	12726	I3L4K4:P04275:Q8TCE8	NP_000543.2	Von Willebrand disease	p.ARG1205LEU
Core matrisome	ECM Glycoproteins	VWF	von Willebrand factor	12726	I3L4K4:P04275:Q8TCE8	NP_000543.2	VWD2	p.ARG1306TRP
Core matrisome	ECM Glycoproteins	VWF	von Willebrand factor	12726	I3L4K4:P04275:Q8TCE8	NP_000543.2	VWD2	p.ARG1308CYS
Core matrisome	ECM Glycoproteins	VWF	von Willebrand factor	12726	I3L4K4:P04275:Q8TCE8	NP_000543.2	von Willebrand disease, type 2b	p.ARG1341LEU
Core matrisome	ECM Glycoproteins	VWF	von Willebrand factor	12726	I3L4K4:P04275:Q8TCE8	NP_000543.2	VWD2	p.ARG1597TRP
Core matrisome	ECM Glycoproteins	VWF	von Willebrand factor	12726	I3L4K4:P04275:Q8TCE8	NP_000543.2	von Willebrand disease type 3	p.ARG1659TER
Core matrisome	ECM Glycoproteins	VWF	von Willebrand factor	12726	I3L4K4:P04275:Q8TCE8	NP_000543.2	von Willebrand disease type 3	p.ARG1853TER
Core matrisome	ECM Glycoproteins	VWF	von Willebrand factor	12726	I3L4K4:P04275:Q8TCE8	NP_000543.2	von Willebrand disease type 3	p.ARG2535TER
Core matrisome	ECM Glycoproteins	VWF	von Willebrand factor	12726	I3L4K4:P04275:Q8TCE8	NP_000543.2	von Willebrand disease type 1	p.ARG760HIS
Core matrisome	ECM Glycoproteins	VWF	von Willebrand factor	12726	I3L4K4:P04275:Q8TCE8	NP_000543.2	VWD2	p.ARG816TRP
Core matrisome	ECM Glycoproteins	VWF	von Willebrand factor	12726	I3L4K4:P04275:Q8TCE8	NP_000543.2	VWD2	p.ARG854GLN
Core matrisome	ECM Glycoproteins	VWF	von Willebrand factor	12726	I3L4K4:P04275:Q8TCE8	NP_000543.2	VWD2	p.ASN528SER
Core matrisome	ECM Glycoproteins	VWF	von Willebrand factor	12726	I3L4K4:P04275:Q8TCE8	NP_000543.2	VWD2	p.CYS1060ARG
Core matrisome	ECM Glycoproteins	VWF	von Willebrand factor	12726	I3L4K4:P04275:Q8TCE8	NP_000543.2	von Willebrand disease type 1	p.CYS1149ARG
Core matrisome	ECM Glycoproteins	VWF	von Willebrand factor	12726	I3L4K4:P04275:Q8TCE8	NP_000543.2	von Willebrand disease, type 2a	p.CYS1272GLY
Core matrisome	ECM Glycoproteins	VWF	von Willebrand factor	12726	I3L4K4:P04275:Q8TCE8	NP_000543.2	von Willebrand disease type 3	p.CYS2362PHE
Core matrisome	ECM Glycoproteins	VWF	von Willebrand factor	12726	I3L4K4:P04275:Q8TCE8	NP_000543.2	VWD2	p.CYS2773ARG
Core matrisome	ECM Glycoproteins	VWF	von Willebrand factor	12726	I3L4K4:P04275:Q8TCE8	NP_000543.2	von Willebrand disease type 2N	p.CYS804PHE
Core matrisome	ECM Glycoproteins	VWF	von Willebrand factor	12726	I3L4K4:P04275:Q8TCE8	NP_000543.2	VWD2	p.GLY1324SER
Core matrisome	ECM Glycoproteins	VWF	von Willebrand factor	12726	I3L4K4:P04275:Q8TCE8	NP_000543.2	VWD2	p.GLY550ARG
Core matrisome	ECM Glycoproteins	VWF	von Willebrand factor	12726	I3L4K4:P04275:Q8TCE8	NP_000543.2	VWD2	p.ILE1628THR
Core matrisome	ECM Glycoproteins	VWF	von Willebrand factor	12726	I3L4K4:P04275:Q8TCE8	NP_000543.2	VWD2	p.PHE1514CYS
Core matrisome	ECM Glycoproteins	VWF	von Willebrand factor	12726	I3L4K4:P04275:Q8TCE8	NP_000543.2	VWD2	p.PRO1266LEU
Core matrisome	ECM Glycoproteins	VWF	von Willebrand factor	12726	I3L4K4:P04275:Q8TCE8	NP_000543.2	von Willebrand disease type 2M	p.SER1285PHE
Core matrisome	ECM Glycoproteins	VWF	von Willebrand factor	12726	I3L4K4:P04275:Q8TCE8	NP_000543.2	VWD2	p.SER1613PRO
Core matrisome	ECM Glycoproteins	VWF	von Willebrand factor	12726	I3L4K4:P04275:Q8TCE8	NP_000543.2	von Willebrand disease type 2	p.SER1783ALA
Core matrisome	ECM Glycoproteins	VWF	von Willebrand factor	12726	I3L4K4:P04275:Q8TCE8	NP_000543.2	VWD2	p.THR791MET
Core matrisome	ECM Glycoproteins	VWF	von Willebrand factor	12726	I3L4K4:P04275:Q8TCE8	NP_000543.2	VWD2	p.TRP1313CYS
Core matrisome	ECM Glycoproteins	VWF	von Willebrand factor	12726	I3L4K4:P04275:Q8TCE8	NP_000543.2	von Willebrand disease type 2	p.TYR1146CYS
Core matrisome	ECM Glycoproteins	VWF	von Willebrand factor	12726	I3L4K4:P04275:Q8TCE8	NP_000543.2	von Willebrand disease, type 1, susceptibility to	p.TYR1584CYS
Core matrisome	ECM Glycoproteins	VWF	von Willebrand factor	12726	I3L4K4:P04275:Q8TCE8	NP_000543.2	von Willebrand disease type 2N	p.TYR357TER
Core matrisome	ECM Glycoproteins	VWF	von Willebrand factor	12726	I3L4K4:P04275:Q8TCE8	NP_000543.2	von Willebrand disease type 2N	p.TYR795CYS
Core matrisome	ECM Glycoproteins	VWF	von Willebrand factor	12726	I3L4K4:P04275:Q8TCE8	NP_000543.2	von Willebrand disease, type 2b	p.VAL1314PHE
Core matrisome	ECM Glycoproteins	VWF	von Willebrand factor	12726	I3L4K4:P04275:Q8TCE8	NP_000543.2	VWD2	p.VAL1316MET
Core matrisome	ECM Glycoproteins	VWF	von Willebrand factor	12726	I3L4K4:P04275:Q8TCE8	NP_000543.2	VWD2	p.VAL1607ASP
Core matrisome	ECM Glycoproteins	VWF	von Willebrand factor	12726	I3L4K4:P04275:Q8TCE8	NP_000543.2	von Willebrand disease (3)	NA
Core matrisome	ECM Glycoproteins	WISP3	WNT1 inducible signaling pathway protein 3	12771	F8WC24:G3V0J1:O95389:O95958:Q3T1A9	NP_003871.1:NP_937882.1:XP_005267252.1	ARTHROPATHY, PROGRESSIVE PSEUDORHEUMATOID, OF CHILDHOOD	p.CYS145TYR
Core matrisome	ECM Glycoproteins	WISP3	WNT1 inducible signaling pathway protein 3	12771	F8WC24:G3V0J1:O95389:O95958:Q3T1A9	NP_003871.1:NP_937882.1:XP_005267252.1	ARTHROPATHY, PROGRESSIVE PSEUDORHEUMATOID, OF CHILDHOOD	p.CYS52TER
Core matrisome	ECM Glycoproteins	WISP3	WNT1 inducible signaling pathway protein 3	12771	F8WC24:G3V0J1:O95389:O95958:Q3T1A9	NP_003871.1:NP_937882.1:XP_005267252.1	ARTHROPATHY, PROGRESSIVE PSEUDORHEUMATOID, OF CHILDHOOD	p.CYS78ARG
Core matrisome	ECM Glycoproteins	WISP3	WNT1 inducible signaling pathway protein 3	12771	F8WC24:G3V0J1:O95389:O95958:Q3T1A9	NP_003871.1:NP_937882.1:XP_005267252.1	Progressive pseudorheumatoid dysplasia	p.SER334PRO
Core matrisome	ECM Glycoproteins	WISP3	WNT1 inducible signaling pathway protein 3	12771	F8WC24:G3V0J1:O95389:O95958:Q3T1A9	NP_003871.1:NP_937882.1:XP_005267252.1	ARTHROPATHY, PROGRESSIVE PSEUDORHEUMATOID, OF CHILDHOOD	p.TRP331TER
Core matrisome	ECM Glycoproteins	WISP3	WNT1 inducible signaling pathway protein 3	12771	F8WC24:G3V0J1:O95389:O95958:Q3T1A9	NP_003871.1:NP_937882.1:XP_005267252.1	Arthropathy, progressive pseudorheumatoid, of childhood, 208230 (3)	NA
Core matrisome	ECM Glycoproteins	WISP3	WNT1 inducible signaling pathway protein 3	12771	F8WC24:G3V0J1:O95389:O95958:Q3T1A9	NP_003871.1:NP_937882.1:XP_005267252.1	Spondyloepiphyseal dysplasia tarda with progressive arthropathy, 208230 (3)	NA
Core matrisome	ECM Glycoproteins	ZP1	zona pellucida glycoprotein 1 (sperm receptor)	13187	H0YG11:P60852	NP_997224.2	female infertility due to zona pellucida defect	NA
Core matrisome	ECM Glycoproteins	ZP2	zona pellucida glycoprotein 2 (sperm receptor)	13188	Q05996	NP_001277033.1:NP_003451.1	female infertility due to zona pellucida defect	NA
Core matrisome	ECM Glycoproteins	ZP3	zona pellucida glycoprotein 3 (sperm receptor)	13189	E9PFI9:H0Y3M4:P21754	NP_001103824.1:NP_009086.4	female infertility due to zona pellucida defect	NA
Core matrisome	ECM Glycoproteins	ZP3	zona pellucida glycoprotein 3 (sperm receptor)	13189	E9PFI9:H0Y3M4:P21754	NP_001103824.1:NP_009086.4	oocyte maturation defect 3	NA
Core matrisome	Proteoglycans	ACAN	aggrecan	319	E7ENV9:E7EX88:H0YK70:H0YM81:H0YMF1:P16112:Q6PID9	NP_001126.3:NP_037359.3	Spondyloepimetaphyseal dysplasia	p.ASP2381ASN
Core matrisome	Proteoglycans	ACAN	aggrecan	319	E7ENV9:E7EX88:H0YK70:H0YM81:H0YMF1:P16112:Q6PID9	NP_001126.3:NP_037359.3	osteochondritis dissecans (disease)	NA
Core matrisome	Proteoglycans	ACAN	aggrecan	319	E7ENV9:E7EX88:H0YK70:H0YM81:H0YMF1:P16112:Q6PID9	NP_001126.3:NP_037359.3	short stature-advanced bone age-early-onset osteoarthritis syndrome	NA
Core matrisome	Proteoglycans	ACAN	aggrecan	319	E7ENV9:E7EX88:H0YK70:H0YM81:H0YMF1:P16112:Q6PID9	NP_001126.3:NP_037359.3	spondyloepimetaphyseal dysplasia, aggrecan type	NA
Core matrisome	Proteoglycans	ACAN	aggrecan	319	E7ENV9:E7EX88:H0YK70:H0YM81:H0YMF1:P16112:Q6PID9	NP_001126.3:NP_037359.3	spondyloepiphyseal dysplasia, Kimberley type	NA
Core matrisome	Proteoglycans	ASPN	asporin	14872	C9JGC9:Q05CQ6:Q5TBF2:Q9BXN1	NP_001180264.1:NP_060150.4	Osteoarthritis, susceptibility to, 165720 (3)	NA
Core matrisome	Proteoglycans	BGN	biglycan	1044	C9JKG1:P21810	NP_001702.1	Meester-Loeys syndrome	NA
Core matrisome	Proteoglycans	BGN	biglycan	1044	C9JKG1:P21810	NP_001702.1	X-linked spondyloepimetaphyseal dysplasia	NA
Core matrisome	Proteoglycans	DCN	decorin	2705	F8VNV6:F8VNW0:F8VSI3:F8VU58:F8VUF6:F8VWU0:F8VX58:F8VXZ8:H0YI87:H0YIH3:P07585	NP_001911.1:NP_598010.1:NP_598011.1:NP_598012.1:NP_598013.1:NP_598014.1:XP_005268750.1:XP_006719333.1	congenital stromal corneal dystrophy	NA
Core matrisome	Proteoglycans	HSPG2	heparan sulfate proteoglycan 2	5273	H0Y5A9:H7BYA5:H7C4A6:P98160:Q5SZI5:Q5SZI9:Q5SZJ1:Q5SZJ2	NP_001278789.1:NP_005520.4	Schwartz Jampel syndrome type 1	p.CYS1532TYR
Core matrisome	Proteoglycans	HSPG2	heparan sulfate proteoglycan 2	5273	H0Y5A9:H7BYA5:H7C4A6:P98160:Q5SZI5:Q5SZI9:Q5SZJ1:Q5SZJ2	NP_001278789.1:NP_005520.4	Dyssegmental dysplasia, Silverman-Handmaker type, 224410 (3)	NA
Core matrisome	Proteoglycans	HSPG2	heparan sulfate proteoglycan 2	5273	H0Y5A9:H7BYA5:H7C4A6:P98160:Q5SZI5:Q5SZI9:Q5SZJ1:Q5SZJ2	NP_001278789.1:NP_005520.4	Schwartz-Jampel syndrome, type 1, 255800 (3)	NA
Core matrisome	Proteoglycans	HSPG2	heparan sulfate proteoglycan 2	5273	H0Y5A9:H7BYA5:H7C4A6:P98160:Q5SZI5:Q5SZI9:Q5SZJ1:Q5SZJ2	NP_001278789.1:NP_005520.4	Schwartz-Jampel syndrome	NA
Core matrisome	Proteoglycans	HSPG2	heparan sulfate proteoglycan 2	5273	H0Y5A9:H7BYA5:H7C4A6:P98160:Q5SZI5:Q5SZI9:Q5SZJ1:Q5SZJ2	NP_001278789.1:NP_005520.4	Silverman-Handmaker type dyssegmental dysplasia	NA
Core matrisome	Proteoglycans	IMPG1	interphotoreceptor matrix proteoglycan 1	6055	Q17R60:Q5JSC4:Q68D53	NP_001269297.1:NP_001554.2	adult-onset foveomacular vitelliform dystrophy	NA
Core matrisome	Proteoglycans	IMPG1	interphotoreceptor matrix proteoglycan 1	6055	Q17R60:Q5JSC4:Q68D53	NP_001269297.1:NP_001554.2	vitelliform macular dystrophy 4	NA
Core matrisome	Proteoglycans	IMPG2	interphotoreceptor matrix proteoglycan 2	18362	Q9BZV3	NP_057331.2	RETINITIS PIGMENTOSA 56	p.ARG906TER
Core matrisome	Proteoglycans	IMPG2	interphotoreceptor matrix proteoglycan 2	18362	Q9BZV3	NP_057331.2	RETINITIS PIGMENTOSA 56	p.ARG964TER
Core matrisome	Proteoglycans	IMPG2	interphotoreceptor matrix proteoglycan 2	18362	Q9BZV3	NP_057331.2	RETINITIS PIGMENTOSA 56	p.SER212TER
Core matrisome	Proteoglycans	IMPG2	interphotoreceptor matrix proteoglycan 2	18362	Q9BZV3	NP_057331.2	adult-onset foveomacular vitelliform dystrophy	NA
Core matrisome	Proteoglycans	IMPG2	interphotoreceptor matrix proteoglycan 2	18362	Q9BZV3	NP_057331.2	retinitis pigmentosa	NA
Core matrisome	Proteoglycans	IMPG2	interphotoreceptor matrix proteoglycan 2	18362	Q9BZV3	NP_057331.2	retinitis pigmentosa 56	NA
Core matrisome	Proteoglycans	IMPG2	interphotoreceptor matrix proteoglycan 2	18362	Q9BZV3	NP_057331.2	vitelliform macular dystrophy 5	NA
Core matrisome	Proteoglycans	KERA	keratocan	6309	O60938	NP_008966.1	Cornea plana congenita, recessive, 217300 (3)	NA
Core matrisome	Proteoglycans	KERA	keratocan	6309	O60938	NP_008966.1	congenital cornea plana	NA
Core matrisome	Proteoglycans	KERA	keratocan	6309	O60938	NP_008966.1	cornea plana 2	NA
Core matrisome	Proteoglycans	NYX	nyctalopin	8082	Q9GZU5	NP_072089.1:XP_005272689.1	Congenital stationary night blindness, type 1A	p.ARG94PRO
Core matrisome	Proteoglycans	NYX	nyctalopin	8082	Q9GZU5	NP_072089.1:XP_005272689.1	Congenital stationary night blindness, type 1A	p.CYS35TER
Core matrisome	Proteoglycans	NYX	nyctalopin	8082	Q9GZU5	NP_072089.1:XP_005272689.1	Congenital stationary night blindness, type 1A	p.ILE101THR
Core matrisome	Proteoglycans	NYX	nyctalopin	8082	Q9GZU5	NP_072089.1:XP_005272689.1	Congenital stationary night blindness, type 1A	p.TRP350TER
Core matrisome	Proteoglycans	NYX	nyctalopin	8082	Q9GZU5	NP_072089.1:XP_005272689.1	Night blindness, congenital stationary, type 1, 310500 (3)	NA
Core matrisome	Proteoglycans	NYX	nyctalopin	8082	Q9GZU5	NP_072089.1:XP_005272689.1	congenital stationary night blindness	NA
Core matrisome	Proteoglycans	NYX	nyctalopin	8082	Q9GZU5	NP_072089.1:XP_005272689.1	congenital stationary night blindness 1A	NA
Core matrisome	Proteoglycans	PRG4	p53-responsive gene 4	9364	E7EQ48:E9PLR3:J3KP74:Q92954	NP_001121180.1:NP_001121181.1:NP_001121182.1:NP_005798.2	Camptodactyly-arthropathy-coxa vara-pericarditis syndrome, 208250 (3)	NA
Core matrisome	Proteoglycans	PRG4	p53-responsive gene 4	9364	E7EQ48:E9PLR3:J3KP74:Q92954	NP_001121180.1:NP_001121181.1:NP_001121182.1:NP_005798.2	camptodactyly-arthropathy-coxa vara-pericarditis syndrome	NA
Core matrisome	Proteoglycans	VCAN	versican	2464	D6RGZ6:E9PF17:P13611:Q86W61	NP_001119808.1:NP_001119808.1:NP_001157569.1:NP_001157570.1:NP_004376.2	Wagner disease	NA
Matrisome-associated	ECM Regulators	A2M	alpha-2-macroglobulin	7	F5H1E8:F8W7L3:H0YFH1:H0YGH6:P01023	NP_000005.2	ALPHA-2-MACROGLOBULIN POLYMORPHISM	p.ILE1000VAL
Matrisome-associated	ECM Regulators	A2M	alpha-2-macroglobulin	7	F5H1E8:F8W7L3:H0YFH1:H0YGH6:P01023	NP_000005.2	Alzheimer disease, susceptibility to (3)	NA
Matrisome-associated	ECM Regulators	A2ML1	alpha-2-macroglobulin-like 1	23336	A8K2U0:F5GXP1:F5GYG7:F5H2Z2:H0YGG5:H0YH14	NP_653271.2	Noonan syndrome	NA
Matrisome-associated	ECM Regulators	ADAM10	ADAM metallopeptidase domain 10	188	B4DU28:B5MC71:C9J9B4:H0YK32:H0YK87:H0YNC5:H3BS53:O14672	NP_001101.1	reticulate acropigmentation of Kitamura	NA
Matrisome-associated	ECM Regulators	ADAM17	ADAM metallopeptidase domain 17	195	E7EUI5:P78536	NP_003174.3	neonatal inflammatory skin and bowel disease	NA
Matrisome-associated	ECM Regulators	ADAM9	ADAM metallopeptidase domain 9 (meltrin gamma)	216	A0AVL1:C9J6H5:C9JPM3:F8WC54:Q13443	NP_003807.1	Cone-rod dystrophy	p.ARG164TER
Matrisome-associated	ECM Regulators	ADAM9	ADAM metallopeptidase domain 9 (meltrin gamma)	216	A0AVL1:C9J6H5:C9JPM3:F8WC54:Q13443	NP_003807.1	Cone-rod dystrophy	p.ARG256TER
Matrisome-associated	ECM Regulators	ADAM9	ADAM metallopeptidase domain 9 (meltrin gamma)	216	A0AVL1:C9J6H5:C9JPM3:F8WC54:Q13443	NP_003807.1	cone-rod dystrophy	NA
Matrisome-associated	ECM Regulators	ADAM9	ADAM metallopeptidase domain 9 (meltrin gamma)	216	A0AVL1:C9J6H5:C9JPM3:F8WC54:Q13443	NP_003807.1	cone-rod dystrophy 9	NA
Matrisome-associated	ECM Regulators	ADAMTS10	ADAM metallopeptidase with thrombospondin type 1 motif, 10	13201	M0QY12:M0QY36:Q9H324	NP_001269281.1:NP_112219.3	Weill-Marchesani syndrome	p.ARG237TER
Matrisome-associated	ECM Regulators	ADAMTS10	ADAM metallopeptidase with thrombospondin type 1 motif, 10	13201	M0QY12:M0QY36:Q9H324	NP_001269281.1:NP_112219.3	Weill-Marchesani syndrome	p.GLN318TER
Matrisome-associated	ECM Regulators	ADAMTS10	ADAM metallopeptidase with thrombospondin type 1 motif, 10	13201	M0QY12:M0QY36:Q9H324	NP_001269281.1:NP_112219.3	Weill-Marchesani syndrome	p.GLY518ASP
Matrisome-associated	ECM Regulators	ADAMTS10	ADAM metallopeptidase with thrombospondin type 1 motif, 10	13201	M0QY12:M0QY36:Q9H324	NP_001269281.1:NP_112219.3	Weill-Marchesani syndrome	p.GLY700CYS
Matrisome-associated	ECM Regulators	ADAMTS10	ADAM metallopeptidase with thrombospondin type 1 motif, 10	13201	M0QY12:M0QY36:Q9H324	NP_001269281.1:NP_112219.3	Weill-Marchesani syndrome, recessive, 277600 (3)	NA
Matrisome-associated	ECM Regulators	ADAMTS10	ADAM metallopeptidase with thrombospondin type 1 motif, 10	13201	M0QY12:M0QY36:Q9H324	NP_001269281.1:NP_112219.3	Weill-Marchesani syndrome	NA
Matrisome-associated	ECM Regulators	ADAMTS10	ADAM metallopeptidase with thrombospondin type 1 motif, 10	13201	M0QY12:M0QY36:Q9H324	NP_001269281.1:NP_112219.3	Weill-Marchesani syndrome 1	NA
Matrisome-associated	ECM Regulators	ADAMTS13	ADAM metallopeptidase with thrombospondin type 1 motif, 13	1366	E7EV88:Q76LX8:Q9UGQ1	NP_620594.1:NP_620595.1:NP_620596.2	Thrombotic thrombocytopaenic purpura	p.ALA250VAL
Matrisome-associated	ECM Regulators	ADAMTS13	ADAM metallopeptidase with thrombospondin type 1 motif, 13	1366	E7EV88:Q76LX8:Q9UGQ1	NP_620594.1:NP_620595.1:NP_620596.2	Thrombotic thrombocytopaenic purpura	p.ARG102CYS
Matrisome-associated	ECM Regulators	ADAMTS13	ADAM metallopeptidase with thrombospondin type 1 motif, 13	1366	E7EV88:Q76LX8:Q9UGQ1	NP_620594.1:NP_620595.1:NP_620596.2	Thrombotic thrombocytopaenic purpura	p.ARG268PRO
Matrisome-associated	ECM Regulators	ADAMTS13	ADAM metallopeptidase with thrombospondin type 1 motif, 13	1366	E7EV88:Q76LX8:Q9UGQ1	NP_620594.1:NP_620595.1:NP_620596.2	Thrombotic thrombocytopaenic purpura	p.ARG398HIS
Matrisome-associated	ECM Regulators	ADAMTS13	ADAM metallopeptidase with thrombospondin type 1 motif, 13	1366	E7EV88:Q76LX8:Q9UGQ1	NP_620594.1:NP_620595.1:NP_620596.2	Thrombotic thrombocytopaenic purpura	p.ARG528GLY
Matrisome-associated	ECM Regulators	ADAMTS13	ADAM metallopeptidase with thrombospondin type 1 motif, 13	1366	E7EV88:Q76LX8:Q9UGQ1	NP_620594.1:NP_620595.1:NP_620596.2	Thrombotic thrombocytopaenic purpura	p.ARG692CYS
Matrisome-associated	ECM Regulators	ADAMTS13	ADAM metallopeptidase with thrombospondin type 1 motif, 13	1366	E7EV88:Q76LX8:Q9UGQ1	NP_620594.1:NP_620595.1:NP_620596.2	Thrombotic thrombocytopaenic purpura	p.CYS1024GLY
Matrisome-associated	ECM Regulators	ADAMTS13	ADAM metallopeptidase with thrombospondin type 1 motif, 13	1366	E7EV88:Q76LX8:Q9UGQ1	NP_620594.1:NP_620595.1:NP_620596.2	Thrombotic thrombocytopaenic purpura	p.CYS1213TYR
Matrisome-associated	ECM Regulators	ADAMTS13	ADAM metallopeptidase with thrombospondin type 1 motif, 13	1366	E7EV88:Q76LX8:Q9UGQ1	NP_620594.1:NP_620595.1:NP_620596.2	Thrombotic thrombocytopaenic purpura	p.CYS951GLY
Matrisome-associated	ECM Regulators	ADAMTS13	ADAM metallopeptidase with thrombospondin type 1 motif, 13	1366	E7EV88:Q76LX8:Q9UGQ1	NP_620594.1:NP_620595.1:NP_620596.2	THROMBOTIC THROMBOCYTOPENIC PURPURA, CONGENITAL	p.GLN448GLU
Matrisome-associated	ECM Regulators	ADAMTS13	ADAM metallopeptidase with thrombospondin type 1 motif, 13	1366	E7EV88:Q76LX8:Q9UGQ1	NP_620594.1:NP_620595.1:NP_620596.2	Thrombotic thrombocytopaenic purpura	p.GLN449TER
Matrisome-associated	ECM Regulators	ADAMTS13	ADAM metallopeptidase with thrombospondin type 1 motif, 13	1366	E7EV88:Q76LX8:Q9UGQ1	NP_620594.1:NP_620595.1:NP_620596.2	Thrombotic thrombocytopaenic purpura	p.HIS96ASP
Matrisome-associated	ECM Regulators	ADAMTS13	ADAM metallopeptidase with thrombospondin type 1 motif, 13	1366	E7EV88:Q76LX8:Q9UGQ1	NP_620594.1:NP_620595.1:NP_620596.2	THROMBOTIC THROMBOCYTOPENIC PURPURA, CONGENITAL	p.PRO475SER
Matrisome-associated	ECM Regulators	ADAMTS13	ADAM metallopeptidase with thrombospondin type 1 motif, 13	1366	E7EV88:Q76LX8:Q9UGQ1	NP_620594.1:NP_620595.1:NP_620596.2	Thrombotic thrombocytopaenic purpura	p.THR196ILE
Matrisome-associated	ECM Regulators	ADAMTS13	ADAM metallopeptidase with thrombospondin type 1 motif, 13	1366	E7EV88:Q76LX8:Q9UGQ1	NP_620594.1:NP_620595.1:NP_620596.2	Thrombotic thrombocytopenic purpura, familial, 274150 (3)	NA
Matrisome-associated	ECM Regulators	ADAMTS13	ADAM metallopeptidase with thrombospondin type 1 motif, 13	1366	E7EV88:Q76LX8:Q9UGQ1	NP_620594.1:NP_620595.1:NP_620596.2	congenital thrombotic thrombocytopenic purpura	NA
Matrisome-associated	ECM Regulators	ADAMTS17	ADAM metallopeptidase with thrombospondin type 1 motif, 17	17109	H0YMH1:H3BRA9:H3BV94:Q8TE56	NP_620688.2	ichthyosis-short stature-brachydactyly-microspherophakia syndrome	NA
Matrisome-associated	ECM Regulators	ADAMTS18	ADAM metallopeptidase with thrombospondin type 1 motif, 18	17110	B4DEX3:H3BMG1:H3BTZ3:Q8TE60	NP_955387.1	microcornea-myopic chorioretinal atrophy-telecanthus syndrome	NA
Matrisome-associated	ECM Regulators	ADAMTS2	ADAM metallopeptidase with thrombospondin type 1 motif, 2	218	O95450	NP_055059.2:NP_067610.1	Ehlers-Danlos syndrome, type VIIC	p.GLN225TER
Matrisome-associated	ECM Regulators	ADAMTS2	ADAM metallopeptidase with thrombospondin type 1 motif, 2	218	O95450	NP_055059.2:NP_067610.1	Ehlers-Danlos syndrome, type VIIC	p.TRP795TER
Matrisome-associated	ECM Regulators	ADAMTS2	ADAM metallopeptidase with thrombospondin type 1 motif, 2	218	O95450	NP_055059.2:NP_067610.1	Ehlers-Danlos syndrome, type VIIC, 225410 (3)	NA
Matrisome-associated	ECM Regulators	ADAMTS2	ADAM metallopeptidase with thrombospondin type 1 motif, 2	218	O95450	NP_055059.2:NP_067610.1	Ehlers-Danlos syndrome, dermatosparaxis type	NA
Matrisome-associated	ECM Regulators	ADAMTS3	ADAM metallopeptidase with thrombospondin type 1 motif, 3	219	O15072	NP_055058.2	Hennekam syndrome	NA
Matrisome-associated	ECM Regulators	ADAMTS9	ADAM metallopeptidase with thrombospondin type 1 motif, 9	13202	C9JWI2:H0Y859:Q9P2N4	NP_891550.1:XP_005265386.1	nephronophthisis 1	NA
Matrisome-associated	ECM Regulators	ADAMTSL2	ADAMTS-like 2	14631	B1B0D4:Q86TH1	NP_001138792.1:NP_055509.2:XP_005272296.1:XP_006717400.1:XP_005272294.1	geleophysic dysplasia	NA
Matrisome-associated	ECM Regulators	ADAMTSL2	ADAMTS-like 2	14631	B1B0D4:Q86TH1	NP_001138792.1:NP_055509.2:XP_005272296.1:XP_006717400.1:XP_005272294.1	geleophysic dysplasia 1	NA
Matrisome-associated	ECM Regulators	ADAMTSL4	ADAMTS-like 4	19706	F8WAD0:Q6UY14	NP_001275536.1:NP_001275537.1:NP_061905.2:NP_079284.2:NP_001275537.1	ECTOPIA LENTIS 2, ISOLATED, AUTOSOMAL RECESSIVE	p.TYR595TER
Matrisome-associated	ECM Regulators	ADAMTSL4	ADAMTS-like 4	19706	F8WAD0:Q6UY14	NP_001275536.1:NP_001275537.1:NP_061905.2:NP_079284.2:NP_001275537.1	ectopia lentis 2, isolated, autosomal recessive	NA
Matrisome-associated	ECM Regulators	ADAMTSL4	ADAMTS-like 4	19706	F8WAD0:Q6UY14	NP_001275536.1:NP_001275537.1:NP_061905.2:NP_079284.2:NP_001275537.1	ectopia lentis et pupillae	NA
Matrisome-associated	ECM Regulators	ADAMTSL4	ADAMTS-like 4	19706	F8WAD0:Q6UY14	NP_001275536.1:NP_001275537.1:NP_061905.2:NP_079284.2:NP_001275537.1	isolated ectopia lentis	NA
Matrisome-associated	ECM Regulators	AGT	angiotensinogen (serpin peptidase inhibitor, clade A, member 8)	333	P01019	NP_000020.1	Renal dysplasia	p.ARG375GLN
Matrisome-associated	ECM Regulators	AGT	angiotensinogen (serpin peptidase inhibitor, clade A, member 8)	333	P01019	NP_000020.1	Renal dysplasia	p.GLN202TER
Matrisome-associated	ECM Regulators	AGT	angiotensinogen (serpin peptidase inhibitor, clade A, member 8)	333	P01019	NP_000020.1	Essential hypertension	p.MET10LEU
Matrisome-associated	ECM Regulators	AGT	angiotensinogen (serpin peptidase inhibitor, clade A, member 8)	333	P01019	NP_000020.1	Hypertension	p.MET268THR
Matrisome-associated	ECM Regulators	AGT	angiotensinogen (serpin peptidase inhibitor, clade A, member 8)	333	P01019	NP_000020.1	Hypertension, essential, susceptibility to, 145500 (3)	NA
Matrisome-associated	ECM Regulators	AGT	angiotensinogen (serpin peptidase inhibitor, clade A, member 8)	333	P01019	NP_000020.1	Preeclampsia, susceptibility to (3)	NA
Matrisome-associated	ECM Regulators	AGT	angiotensinogen (serpin peptidase inhibitor, clade A, member 8)	333	P01019	NP_000020.1	Renal tubular dysgenesis, 267430 (3)	NA
Matrisome-associated	ECM Regulators	BMP1	bone morphogenetic protein 1	1067	B7ZKR5:E5RH22:P13497:Q3MIM8	NP_001190.1:NP_006120.1	high bone mass osteogenesis imperfecta	NA
Matrisome-associated	ECM Regulators	BMP1	bone morphogenetic protein 1	1067	B7ZKR5:E5RH22:P13497:Q3MIM8	NP_001190.1:NP_006120.1	osteogenesis imperfecta type 13	NA
Matrisome-associated	ECM Regulators	BMP1	bone morphogenetic protein 1	1067	B7ZKR5:E5RH22:P13497:Q3MIM8	NP_001190.1:NP_006120.1	osteogenesis imperfecta type 3	NA
Matrisome-associated	ECM Regulators	CPAMD8	C3 and PZP-like, alpha-2-macroglobulin domain containing 8	23228	F8W7D1:M0QXH3:M0R0Z5:M0R3G7:Q8IZJ3	NP_056507.2	anterior segment dysgenesis 8	NA
Matrisome-associated	ECM Regulators	CST3	cystatin C	2475	P01034	NP_000090.1:NP_001275543.1	Age-related macular degeneration 11	p.ALA25THR
Matrisome-associated	ECM Regulators	CST3	cystatin C	2475	P01034	NP_000090.1:NP_001275543.1	Hereditary cerebral amyloid angiopathy, Icelandic type	p.LEU94GLN
Matrisome-associated	ECM Regulators	CST3	cystatin C	2475	P01034	NP_000090.1:NP_001275543.1	Cerebral amyloid angiopathy, 105150 (3)	NA
Matrisome-associated	ECM Regulators	CST3	cystatin C	2475	P01034	NP_000090.1:NP_001275543.1	ACys amyloidosis	NA
Matrisome-associated	ECM Regulators	CSTA	cystatin A (stefin A)	2481	C9J0E4:P01040	NP_005204.1	acral peeling skin syndrome	NA
Matrisome-associated	ECM Regulators	CSTA	cystatin A (stefin A)	2481	C9J0E4:P01040	NP_005204.1	exfoliative ichthyosis	NA
Matrisome-associated	ECM Regulators	CSTA	cystatin A (stefin A)	2481	C9J0E4:P01040	NP_005204.1	peeling skin syndrome 4	NA
Matrisome-associated	ECM Regulators	CSTB	cystatin B (stefin B)	2482	P04080	NP_000091.1	Epilepsy, progressive myoclonus	p.ARG68TER
Matrisome-associated	ECM Regulators	CSTB	cystatin B (stefin B)	2482	P04080	NP_000091.1	Epilepsy, progressive myoclonus	p.GLN71PRO
Matrisome-associated	ECM Regulators	CSTB	cystatin B (stefin B)	2482	P04080	NP_000091.1	Epilepsy, progressive myoclonus	p.GLY4ARG
Matrisome-associated	ECM Regulators	CSTB	cystatin B (stefin B)	2482	P04080	NP_000091.1	Epilepsy, progressive myoclonic 1, 254800 (3)	NA
Matrisome-associated	ECM Regulators	CSTB	cystatin B (stefin B)	2482	P04080	NP_000091.1	Unverricht-Lundborg syndrome	NA
Matrisome-associated	ECM Regulators	CTSA	cathepsin A	9251	P10619:Q5JZG9:Q5JZH0:U3KQ41:U3KQF1:U3KQU6:X6R5C5:X6R8A1	NP_000299.2:NP_000299.2:NP_001121167.1:NP_001161066.1:NP_001161066.1	Combined deficiency of sialidase AND beta galactosidase	p.GLN49ARG
Matrisome-associated	ECM Regulators	CTSA	cathepsin A	9251	P10619:Q5JZG9:Q5JZH0:U3KQ41:U3KQF1:U3KQU6:X6R5C5:X6R8A1	NP_000299.2:NP_000299.2:NP_001121167.1:NP_001161066.1:NP_001161066.1	Galactosialidosis (GSL)	p.GLY439SER
Matrisome-associated	ECM Regulators	CTSA	cathepsin A	9251	P10619:Q5JZG9:Q5JZH0:U3KQ41:U3KQF1:U3KQU6:X6R5C5:X6R8A1	NP_000299.2:NP_000299.2:NP_001121167.1:NP_001161066.1:NP_001161066.1	Galactosialidosis (GSL)	p.LEU236PRO
Matrisome-associated	ECM Regulators	CTSA	cathepsin A	9251	P10619:Q5JZG9:Q5JZH0:U3KQ41:U3KQF1:U3KQU6:X6R5C5:X6R8A1	NP_000299.2:NP_000299.2:NP_001121167.1:NP_001161066.1:NP_001161066.1	Galactosialidosis (GSL)	p.LYS453GLU
Matrisome-associated	ECM Regulators	CTSA	cathepsin A	9251	P10619:Q5JZG9:Q5JZH0:U3KQ41:U3KQF1:U3KQU6:X6R5C5:X6R8A1	NP_000299.2:NP_000299.2:NP_001121167.1:NP_001161066.1:NP_001161066.1	Galactosialidosis (GSL)	p.MET406THR
Matrisome-associated	ECM Regulators	CTSA	cathepsin A	9251	P10619:Q5JZG9:Q5JZH0:U3KQ41:U3KQF1:U3KQU6:X6R5C5:X6R8A1	NP_000299.2:NP_000299.2:NP_001121167.1:NP_001161066.1:NP_001161066.1	Galactosialidosis (GSL)	p.PHE440VAL
Matrisome-associated	ECM Regulators	CTSA	cathepsin A	9251	P10619:Q5JZG9:Q5JZH0:U3KQ41:U3KQF1:U3KQU6:X6R5C5:X6R8A1	NP_000299.2:NP_000299.2:NP_001121167.1:NP_001161066.1:NP_001161066.1	Combined deficiency of sialidase AND beta galactosidase	p.SER90LEU
Matrisome-associated	ECM Regulators	CTSA	cathepsin A	9251	P10619:Q5JZG9:Q5JZH0:U3KQ41:U3KQF1:U3KQU6:X6R5C5:X6R8A1	NP_000299.2:NP_000299.2:NP_001121167.1:NP_001161066.1:NP_001161066.1	Combined deficiency of sialidase AND beta galactosidase	p.TRP65ARG
Matrisome-associated	ECM Regulators	CTSA	cathepsin A	9251	P10619:Q5JZG9:Q5JZH0:U3KQ41:U3KQF1:U3KQU6:X6R5C5:X6R8A1	NP_000299.2:NP_000299.2:NP_001121167.1:NP_001161066.1:NP_001161066.1	Combined deficiency of sialidase AND beta galactosidase	p.TYR249ASN
Matrisome-associated	ECM Regulators	CTSA	cathepsin A	9251	P10619:Q5JZG9:Q5JZH0:U3KQ41:U3KQF1:U3KQU6:X6R5C5:X6R8A1	NP_000299.2:NP_000299.2:NP_001121167.1:NP_001161066.1:NP_001161066.1	Combined deficiency of sialidase AND beta galactosidase	p.TYR395CYS
Matrisome-associated	ECM Regulators	CTSA	cathepsin A	9251	P10619:Q5JZG9:Q5JZH0:U3KQ41:U3KQF1:U3KQU6:X6R5C5:X6R8A1	NP_000299.2:NP_000299.2:NP_001121167.1:NP_001161066.1:NP_001161066.1	Galactosialidosis (GSL)	p.VAL132MET
Matrisome-associated	ECM Regulators	CTSA	cathepsin A	9251	P10619:Q5JZG9:Q5JZH0:U3KQ41:U3KQF1:U3KQU6:X6R5C5:X6R8A1	NP_000299.2:NP_000299.2:NP_001121167.1:NP_001161066.1:NP_001161066.1	Galactosialidosis (3)	NA
Matrisome-associated	ECM Regulators	CTSA	cathepsin A	9251	P10619:Q5JZG9:Q5JZH0:U3KQ41:U3KQF1:U3KQU6:X6R5C5:X6R8A1	NP_000299.2:NP_000299.2:NP_001121167.1:NP_001161066.1:NP_001161066.1	galactosialidosis	NA
Matrisome-associated	ECM Regulators	CTSB	cathepsin B	2527	E9PCB3:E9PHZ5:E9PID0:E9PIS1:E9PJ67:E9PKQ7:E9PKX0:E9PL32:E9PLY3:E9PNL5:E9PQM1:E9PR00:E9PR54:E9PS78:E9PSG5:P07858:R4GMQ5	NP_001899.1:NP_680090.1:NP_680091.1:NP_680092.1:NP_680093.1:XP_006716307.1:XP_006716308.1	keratolytic winter erythema	NA
Matrisome-associated	ECM Regulators	CTSC	cathepsin C	2528	H0YCY8:H0YDA2:P53634	NP_001107645.1:NP_001805.3:NP_680475.1	Papillon-Lefevre syndrome	p.ARG210TER
Matrisome-associated	ECM Regulators	CTSC	cathepsin C	2528	H0YCY8:H0YDA2:P53634	NP_001107645.1:NP_001805.3:NP_680475.1	Papillon-Lefevre syndrome	p.GLN252LEU
Matrisome-associated	ECM Regulators	CTSC	cathepsin C	2528	H0YCY8:H0YDA2:P53634	NP_001107645.1:NP_001805.3:NP_680475.1	Papillon-Lefevre syndrome	p.GLN286TER
Matrisome-associated	ECM Regulators	CTSC	cathepsin C	2528	H0YCY8:H0YDA2:P53634	NP_001107645.1:NP_001805.3:NP_680475.1	Papillon-Lefevre syndrome	p.GLY301SER
Matrisome-associated	ECM Regulators	CTSC	cathepsin C	2528	H0YCY8:H0YDA2:P53634	NP_001107645.1:NP_001805.3:NP_680475.1	Papillon-Lefevre syndrome	p.HIS127PRO
Matrisome-associated	ECM Regulators	CTSC	cathepsin C	2528	H0YCY8:H0YDA2:P53634	NP_001107645.1:NP_001805.3:NP_680475.1	Papillon-Lefevre syndrome	p.LEU68ARG
Matrisome-associated	ECM Regulators	CTSC	cathepsin C	2528	H0YCY8:H0YDA2:P53634	NP_001107645.1:NP_001805.3:NP_680475.1	Papillon-Lefevre syndrome	p.TRP39SER
Matrisome-associated	ECM Regulators	CTSC	cathepsin C	2528	H0YCY8:H0YDA2:P53634	NP_001107645.1:NP_001805.3:NP_680475.1	Papillon-Lefevre syndrome	p.TRP429CYS
Matrisome-associated	ECM Regulators	CTSC	cathepsin C	2528	H0YCY8:H0YDA2:P53634	NP_001107645.1:NP_001805.3:NP_680475.1	AP1	p.TYR347CYS
Matrisome-associated	ECM Regulators	CTSC	cathepsin C	2528	H0YCY8:H0YDA2:P53634	NP_001107645.1:NP_001805.3:NP_680475.1	AP1	p.TYR412CYS
Matrisome-associated	ECM Regulators	CTSC	cathepsin C	2528	H0YCY8:H0YDA2:P53634	NP_001107645.1:NP_001805.3:NP_680475.1	Haim-Munk syndrome, 245010 (3)	NA
Matrisome-associated	ECM Regulators	CTSC	cathepsin C	2528	H0YCY8:H0YDA2:P53634	NP_001107645.1:NP_001805.3:NP_680475.1	Papillon-Lefevre syndrome, 245000 (3)	NA
Matrisome-associated	ECM Regulators	CTSC	cathepsin C	2528	H0YCY8:H0YDA2:P53634	NP_001107645.1:NP_001805.3:NP_680475.1	Periodontitis, juvenile, 170650 (3)	NA
Matrisome-associated	ECM Regulators	CTSC	cathepsin C	2528	H0YCY8:H0YDA2:P53634	NP_001107645.1:NP_001805.3:NP_680475.1	aggressive periodontitis	NA
Matrisome-associated	ECM Regulators	CTSC	cathepsin C	2528	H0YCY8:H0YDA2:P53634	NP_001107645.1:NP_001805.3:NP_680475.1	Haim-Munk syndrome	NA
Matrisome-associated	ECM Regulators	CTSC	cathepsin C	2528	H0YCY8:H0YDA2:P53634	NP_001107645.1:NP_001805.3:NP_680475.1	Papillon-Lefevre disease	NA
Matrisome-associated	ECM Regulators	CTSD	cathepsin D	2529	C9JH19:F8W787:F8WD96:H7C1V0:P07339	NP_001900.1	Ceroid lipofuscinosis neuronal 10	p.PHE229ILE
Matrisome-associated	ECM Regulators	CTSD	cathepsin D	2529	C9JH19:F8W787:F8WD96:H7C1V0:P07339	NP_001900.1	Ceroid lipofuscinosis neuronal 10	p.TRP383CYS
Matrisome-associated	ECM Regulators	CTSD	cathepsin D	2529	C9JH19:F8W787:F8WD96:H7C1V0:P07339	NP_001900.1	neuronal ceroid lipofuscinosis 10	NA
Matrisome-associated	ECM Regulators	CTSF	cathepsin F	2531	E9PSC2:H0YD65:H0YE42:Q9UBX1	NP_003784.2	neuronal ceroid lipofuscinosis 13	NA
Matrisome-associated	ECM Regulators	CTSK	cathepsin K	2536	P43235:Q5QP40	NP_000387.1	PYCNODYSOSTOSIS	p.ALA277VAL
Matrisome-associated	ECM Regulators	CTSK	cathepsin K	2536	P43235:Q5QP40	NP_000387.1	PYCNODYSOSTOSIS	p.ARG241TER
Matrisome-associated	ECM Regulators	CTSK	cathepsin K	2536	P43235:Q5QP40	NP_000387.1	PYCNODYSOSTOSIS	p.GLY146ARG
Matrisome-associated	ECM Regulators	CTSK	cathepsin K	2536	P43235:Q5QP40	NP_000387.1	PYCNODYSOSTOSIS	p.GLY79GLU
Matrisome-associated	ECM Regulators	CTSK	cathepsin K	2536	P43235:Q5QP40	NP_000387.1	PYCNODYSOSTOSIS	p.LEU309PRO
Matrisome-associated	ECM Regulators	CTSK	cathepsin K	2536	P43235:Q5QP40	NP_000387.1	PYCNODYSOSTOSIS	p.LYS52TER
Matrisome-associated	ECM Regulators	CTSK	cathepsin K	2536	P43235:Q5QP40	NP_000387.1	PYCNODYSOSTOSIS	p.TER330TRP
Matrisome-associated	ECM Regulators	CTSK	cathepsin K	2536	P43235:Q5QP40	NP_000387.1	Pycnodysostosis, 265800 (3)	NA
Matrisome-associated	ECM Regulators	EGLN1	egl nine homolog 1 (C. elegans)	1232	Q9GZT9	NP_071334.1	Erythrocytosis	p.ARG371HIS
Matrisome-associated	ECM Regulators	EGLN1	egl nine homolog 1 (C. elegans)	1232	Q9GZT9	NP_071334.1	Erythrocytosis, familial, 3	p.HIS374ARG
Matrisome-associated	ECM Regulators	EGLN1	egl nine homolog 1 (C. elegans)	1232	Q9GZT9	NP_071334.1	autosomal dominant secondary polycythemia	NA
Matrisome-associated	ECM Regulators	EGLN1	egl nine homolog 1 (C. elegans)	1232	Q9GZT9	NP_071334.1	erythrocytosis, familial, 3	NA
Matrisome-associated	ECM Regulators	ELANE	elastase, neutrophil expressed	3309	P08246	NP_001963.1:XP_005259574.1:XP_006725460.1	Cyclical neutropenia	p.ALA61VAL
Matrisome-associated	ECM Regulators	ELANE	elastase, neutrophil expressed	3309	P08246	NP_001963.1:XP_005259574.1:XP_006725460.1	Cyclical neutropenia	p.ARG220GLN
Matrisome-associated	ECM Regulators	ELANE	elastase, neutrophil expressed	3309	P08246	NP_001963.1:XP_005259574.1:XP_006725460.1	Neutropaenia, congenital	p.CYS71ARG
Matrisome-associated	ECM Regulators	ELANE	elastase, neutrophil expressed	3309	P08246	NP_001963.1:XP_005259574.1:XP_006725460.1	Neutropaenia, congenital	p.GLY214ARG
Matrisome-associated	ECM Regulators	ELANE	elastase, neutrophil expressed	3309	P08246	NP_001963.1:XP_005259574.1:XP_006725460.1	Cyclical neutropenia	p.LEU206PHE
Matrisome-associated	ECM Regulators	ELANE	elastase, neutrophil expressed	3309	P08246	NP_001963.1:XP_005259574.1:XP_006725460.1	Neutropaenia, congenital	p.PRO139LEU
Matrisome-associated	ECM Regulators	ELANE	elastase, neutrophil expressed	3309	P08246	NP_001963.1:XP_005259574.1:XP_006725460.1	Neutropaenia, congenital	p.SER126LEU
Matrisome-associated	ECM Regulators	ELANE	elastase, neutrophil expressed	3309	P08246	NP_001963.1:XP_005259574.1:XP_006725460.1	Neutropaenia, congenital	p.VAL101MET
Matrisome-associated	ECM Regulators	ELANE	elastase, neutrophil expressed	3309	P08246	NP_001963.1:XP_005259574.1:XP_006725460.1	autosomal dominant severe congenital neutropenia	NA
Matrisome-associated	ECM Regulators	ELANE	elastase, neutrophil expressed	3309	P08246	NP_001963.1:XP_005259574.1:XP_006725460.1	cyclic hematopoiesis	NA
Matrisome-associated	ECM Regulators	ELANE	elastase, neutrophil expressed	3309	P08246	NP_001963.1:XP_005259574.1:XP_006725460.1	neutropenia, severe congenital, 1, autosomal dominant	NA
Matrisome-associated	ECM Regulators	F10	coagulation factor X	3528	B7ZBK1:F8WBM7:P00742:Q5JVE8	NP_000495.1:XP_005268355.1	Factor X deficiency	p.ARG287TRP
Matrisome-associated	ECM Regulators	F10	coagulation factor X	3528	B7ZBK1:F8WBM7:P00742:Q5JVE8	NP_000495.1:XP_005268355.1	Factor X deficiency (3)	NA
Matrisome-associated	ECM Regulators	F10	coagulation factor X	3528	B7ZBK1:F8WBM7:P00742:Q5JVE8	NP_000495.1:XP_005268355.1	congenital factor X deficiency	NA
Matrisome-associated	ECM Regulators	F12	coagulation factor XII (Hageman factor)	3530	P00748	NP_000496.2	FACTOR XII (LOCARNO)	p.ARG372PRO
Matrisome-associated	ECM Regulators	F12	coagulation factor XII (Hageman factor)	3530	P00748	NP_000496.2	Angioedema, hereditary	p.THR328ARG
Matrisome-associated	ECM Regulators	F12	coagulation factor XII (Hageman factor)	3530	P00748	NP_000496.2	FACTOR XII (TENRI)	p.TYR53CYS
Matrisome-associated	ECM Regulators	F12	coagulation factor XII (Hageman factor)	3530	P00748	NP_000496.2	Factor XII deficiency (3)	NA
Matrisome-associated	ECM Regulators	F13A1	coagulation factor XIII, A1 polypeptide	3531	A6PVK5:H0Y4W5:H0Y796:P00488:Q9NQP5	NP_000120.2:XP_006715073.1	Factor XIII deficiency	p.ARG172TER
Matrisome-associated	ECM Regulators	F13A1	coagulation factor XIII, A1 polypeptide	3531	A6PVK5:H0Y4W5:H0Y796:P00488:Q9NQP5	NP_000120.2:XP_006715073.1	Factor XIII deficiency	p.ARG261HIS
Matrisome-associated	ECM Regulators	F13A1	coagulation factor XIII, A1 polypeptide	3531	A6PVK5:H0Y4W5:H0Y796:P00488:Q9NQP5	NP_000120.2:XP_006715073.1	Factor XIII deficiency	p.ARG327GLN
Matrisome-associated	ECM Regulators	F13A1	coagulation factor XIII, A1 polypeptide	3531	A6PVK5:H0Y4W5:H0Y796:P00488:Q9NQP5	NP_000120.2:XP_006715073.1	Factor XIII deficiency	p.ARG662TER
Matrisome-associated	ECM Regulators	F13A1	coagulation factor XIII, A1 polypeptide	3531	A6PVK5:H0Y4W5:H0Y796:P00488:Q9NQP5	NP_000120.2:XP_006715073.1	Factor XIII subunit A deficiency	p.ARG682HIS
Matrisome-associated	ECM Regulators	F13A1	coagulation factor XIII, A1 polypeptide	3531	A6PVK5:H0Y4W5:H0Y796:P00488:Q9NQP5	NP_000120.2:XP_006715073.1	Factor XIII deficiency	p.ARG704TRP
Matrisome-associated	ECM Regulators	F13A1	coagulation factor XIII, A1 polypeptide	3531	A6PVK5:H0Y4W5:H0Y796:P00488:Q9NQP5	NP_000120.2:XP_006715073.1	Factor XIII deficiency	p.ASN61LYS
Matrisome-associated	ECM Regulators	F13A1	coagulation factor XIII, A1 polypeptide	3531	A6PVK5:H0Y4W5:H0Y796:P00488:Q9NQP5	NP_000120.2:XP_006715073.1	Factor XIII deficiency	p.GLY502ARG
Matrisome-associated	ECM Regulators	F13A1	coagulation factor XIII, A1 polypeptide	3531	A6PVK5:H0Y4W5:H0Y796:P00488:Q9NQP5	NP_000120.2:XP_006715073.1	Factor XIII deficiency	p.GLY563ARG
Matrisome-associated	ECM Regulators	F13A1	coagulation factor XIII, A1 polypeptide	3531	A6PVK5:H0Y4W5:H0Y796:P00488:Q9NQP5	NP_000120.2:XP_006715073.1	Factor XIII deficiency	p.MET243THR
Matrisome-associated	ECM Regulators	F13A1	coagulation factor XIII, A1 polypeptide	3531	A6PVK5:H0Y4W5:H0Y796:P00488:Q9NQP5	NP_000120.2:XP_006715073.1	Factor XIII deficiency	p.TYR284CYS
Matrisome-associated	ECM Regulators	F13A1	coagulation factor XIII, A1 polypeptide	3531	A6PVK5:H0Y4W5:H0Y796:P00488:Q9NQP5	NP_000120.2:XP_006715073.1	Factor XIII deficiency	p.TYR442TER
Matrisome-associated	ECM Regulators	F13A1	coagulation factor XIII, A1 polypeptide	3531	A6PVK5:H0Y4W5:H0Y796:P00488:Q9NQP5	NP_000120.2:XP_006715073.1	Factor XIII deficiency	p.VAL317PHE
Matrisome-associated	ECM Regulators	F13A1	coagulation factor XIII, A1 polypeptide	3531	A6PVK5:H0Y4W5:H0Y796:P00488:Q9NQP5	NP_000120.2:XP_006715073.1	Myocardial infarction, protection against	p.VAL35LEU
Matrisome-associated	ECM Regulators	F13A1	coagulation factor XIII, A1 polypeptide	3531	A6PVK5:H0Y4W5:H0Y796:P00488:Q9NQP5	NP_000120.2:XP_006715073.1	Factor XIII deficiency	p.VAL415PHE
Matrisome-associated	ECM Regulators	F13A1	coagulation factor XIII, A1 polypeptide	3531	A6PVK5:H0Y4W5:H0Y796:P00488:Q9NQP5	NP_000120.2:XP_006715073.1	Factor XIIIA deficiency (3)	NA
Matrisome-associated	ECM Regulators	F13A1	coagulation factor XIII, A1 polypeptide	3531	A6PVK5:H0Y4W5:H0Y796:P00488:Q9NQP5	NP_000120.2:XP_006715073.1	congenital factor XIII deficiency	NA
Matrisome-associated	ECM Regulators	F13A1	coagulation factor XIII, A1 polypeptide	3531	A6PVK5:H0Y4W5:H0Y796:P00488:Q9NQP5	NP_000120.2:XP_006715073.1	factor XIII, A subunit, deficiency of	NA
Matrisome-associated	ECM Regulators	F13B	coagulation factor XIII, B polypeptide	3534	P05160	NP_001985.2	Venous thrombosis, susceptibility to	p.ARG115HIS
Matrisome-associated	ECM Regulators	F13B	coagulation factor XIII, B polypeptide	3534	P05160	NP_001985.2	Factor XIII deficiency	p.CYS450PHE
Matrisome-associated	ECM Regulators	F13B	coagulation factor XIII, B polypeptide	3534	P05160	NP_001985.2	Factor XIIIB deficiency (3)	NA
Matrisome-associated	ECM Regulators	F13B	coagulation factor XIII, B polypeptide	3534	P05160	NP_001985.2	congenital factor XIII deficiency	NA
Matrisome-associated	ECM Regulators	F13B	coagulation factor XIII, B polypeptide	3534	P05160	NP_001985.2	factor XIII, b subunit, deficiency of	NA
Matrisome-associated	ECM Regulators	F2	coagulation factor II (thrombin)	3535	C9JV37:E9PIT3:P00734	NP_000497.1	Factor II deficiency	p.ARG314CYS
Matrisome-associated	ECM Regulators	F2	coagulation factor II (thrombin)	3535	C9JV37:E9PIT3:P00734	NP_000497.1	Factor II deficiency	p.ARG425CYS
Matrisome-associated	ECM Regulators	F2	coagulation factor II (thrombin)	3535	C9JV37:E9PIT3:P00734	NP_000497.1	Hereditary factor II deficiency disease	p.ARG425HIS
Matrisome-associated	ECM Regulators	F2	coagulation factor II (thrombin)	3535	C9JV37:E9PIT3:P00734	NP_000497.1	DYSPROTHROMBINEMIA PROTHROMBIN HIMI-II	p.ARG431HIS
Matrisome-associated	ECM Regulators	F2	coagulation factor II (thrombin)	3535	C9JV37:E9PIT3:P00734	NP_000497.1	Factor II deficiency	p.ARG461TRP
Matrisome-associated	ECM Regulators	F2	coagulation factor II (thrombin)	3535	C9JV37:E9PIT3:P00734	NP_000497.1	Hereditary factor II deficiency disease	p.ASP595GLU
Matrisome-associated	ECM Regulators	F2	coagulation factor II (thrombin)	3535	C9JV37:E9PIT3:P00734	NP_000497.1	Factor II deficiency	p.GLU200LYS
Matrisome-associated	ECM Regulators	F2	coagulation factor II (thrombin)	3535	C9JV37:E9PIT3:P00734	NP_000497.1	Hereditary factor II deficiency disease	p.GLU343LYS
Matrisome-associated	ECM Regulators	F2	coagulation factor II (thrombin)	3535	C9JV37:E9PIT3:P00734	NP_000497.1	Hereditary factor II deficiency disease	p.GLU352LYS
Matrisome-associated	ECM Regulators	F2	coagulation factor II (thrombin)	3535	C9JV37:E9PIT3:P00734	NP_000497.1	Factor II deficiency	p.GLY601VAL
Matrisome-associated	ECM Regulators	F2	coagulation factor II (thrombin)	3535	C9JV37:E9PIT3:P00734	NP_000497.1	Factor II deficiency	p.MET380THR
Matrisome-associated	ECM Regulators	F2	coagulation factor II (thrombin)	3535	C9JV37:E9PIT3:P00734	NP_000497.1	Dysprothrombinemia (3)	NA
Matrisome-associated	ECM Regulators	F2	coagulation factor II (thrombin)	3535	C9JV37:E9PIT3:P00734	NP_000497.1	Hyperprothrombinemia (3)	NA
Matrisome-associated	ECM Regulators	F2	coagulation factor II (thrombin)	3535	C9JV37:E9PIT3:P00734	NP_000497.1	Hypoprothrombinemia (3)	NA
Matrisome-associated	ECM Regulators	F7	coagulation factor VII (serum prothrombin conversion accelerator)	3544	E9PH36:F5H8B0:P08709	NP_000122.1:NP_062562.1	Factor 7 deficiency	p.ARG413GLN
Matrisome-associated	ECM Regulators	F7	coagulation factor VII (serum prothrombin conversion accelerator)	3544	E9PH36:F5H8B0:P08709	NP_000122.1:NP_062562.1	Factor VII deficiency	p.GLN188TER
Matrisome-associated	ECM Regulators	F7	coagulation factor VII (serum prothrombin conversion accelerator)	3544	E9PH36:F5H8B0:P08709	NP_000122.1:NP_062562.1	Factor VII deficiency (3)	NA
Matrisome-associated	ECM Regulators	F7	coagulation factor VII (serum prothrombin conversion accelerator)	3544	E9PH36:F5H8B0:P08709	NP_000122.1:NP_062562.1	Myocardial infarction, decreased susceptibility to (3)	NA
Matrisome-associated	ECM Regulators	F7	coagulation factor VII (serum prothrombin conversion accelerator)	3544	E9PH36:F5H8B0:P08709	NP_000122.1:NP_062562.1	congenital factor VII deficiency	NA
Matrisome-associated	ECM Regulators	F9	coagulation factor IX	3551	P00740	NP_000124.1	Haemophilia B	p.ALA279THR
Matrisome-associated	ECM Regulators	F9	coagulation factor IX	3551	P00740	NP_000124.1	Haemophilia B	p.ALA337PRO
Matrisome-associated	ECM Regulators	F9	coagulation factor IX	3551	P00740	NP_000124.1	Haemophilia B	p.ALA397PRO
Matrisome-associated	ECM Regulators	F9	coagulation factor IX	3551	P00740	NP_000124.1	Haemophilia B	p.ARG162TER
Matrisome-associated	ECM Regulators	F9	coagulation factor IX	3551	P00740	NP_000124.1	Haemophilia B	p.ARG191CYS
Matrisome-associated	ECM Regulators	F9	coagulation factor IX	3551	P00740	NP_000124.1	Haemophilia B	p.ARG191HIS
Matrisome-associated	ECM Regulators	F9	coagulation factor IX	3551	P00740	NP_000124.1	Haemophilia B	p.ARG226GLN
Matrisome-associated	ECM Regulators	F9	coagulation factor IX	3551	P00740	NP_000124.1	Haemophilia B	p.ARG226TRP
Matrisome-associated	ECM Regulators	F9	coagulation factor IX	3551	P00740	NP_000124.1	Haemophilia B	p.ARG294GLN
Matrisome-associated	ECM Regulators	F9	coagulation factor IX	3551	P00740	NP_000124.1	Haemophilia B	p.ARG294TER
Matrisome-associated	ECM Regulators	F9	coagulation factor IX	3551	P00740	NP_000124.1	Haemophilia B	p.ARG298TER
Matrisome-associated	ECM Regulators	F9	coagulation factor IX	3551	P00740	NP_000124.1	Haemophilia B	p.ARG379GLN
Matrisome-associated	ECM Regulators	F9	coagulation factor IX	3551	P00740	NP_000124.1	Haemophilia B	p.ARG379TER
Matrisome-associated	ECM Regulators	F9	coagulation factor IX	3551	P00740	NP_000124.1	Haemophilia B	p.ARG384TER
Matrisome-associated	ECM Regulators	F9	coagulation factor IX	3551	P00740	NP_000124.1	Haemophilia B	p.ARG75GLN
Matrisome-associated	ECM Regulators	F9	coagulation factor IX	3551	P00740	NP_000124.1	Haemophilia B	p.ARG75TER
Matrisome-associated	ECM Regulators	F9	coagulation factor IX	3551	P00740	NP_000124.1	Haemophilia B	p.ASN166TYR
Matrisome-associated	ECM Regulators	F9	coagulation factor IX	3551	P00740	NP_000124.1	Haemophilia B	p.ASN306SER
Matrisome-associated	ECM Regulators	F9	coagulation factor IX	3551	P00740	NP_000124.1	Haemophilia B	p.ASP110ASN
Matrisome-associated	ECM Regulators	F9	coagulation factor IX	3551	P00740	NP_000124.1	Haemophilia B	p.ASP110GLY
Matrisome-associated	ECM Regulators	F9	coagulation factor IX	3551	P00740	NP_000124.1	Haemophilia B	p.ASP410HIS
Matrisome-associated	ECM Regulators	F9	coagulation factor IX	3551	P00740	NP_000124.1	Haemophilia B	p.ASP93GLY
Matrisome-associated	ECM Regulators	F9	coagulation factor IX	3551	P00740	NP_000124.1	Haemophilia B	p.CYS252SER
Matrisome-associated	ECM Regulators	F9	coagulation factor IX	3551	P00740	NP_000124.1	Haemophilia B	p.CYS268TRP
Matrisome-associated	ECM Regulators	F9	coagulation factor IX	3551	P00740	NP_000124.1	Haemophilia B	p.CYS396SER
Matrisome-associated	ECM Regulators	F9	coagulation factor IX	3551	P00740	NP_000124.1	Haemophilia B	p.CYS64ARG
Matrisome-associated	ECM Regulators	F9	coagulation factor IX	3551	P00740	NP_000124.1	Haemophilia B	p.GLN219TER
Matrisome-associated	ECM Regulators	F9	coagulation factor IX	3551	P00740	NP_000124.1	Hereditary factor IX deficiency disease	p.GLN237LEU
Matrisome-associated	ECM Regulators	F9	coagulation factor IX	3551	P00740	NP_000124.1	Haemophilia B	p.GLN237TER
Matrisome-associated	ECM Regulators	F9	coagulation factor IX	3551	P00740	NP_000124.1	Haemophilia B	p.GLN57TER
Matrisome-associated	ECM Regulators	F9	coagulation factor IX	3551	P00740	NP_000124.1	Haemophilia B	p.GLN96PRO
Matrisome-associated	ECM Regulators	F9	coagulation factor IX	3551	P00740	NP_000124.1	Haemophilia B	p.GLU291VAL
Matrisome-associated	ECM Regulators	F9	coagulation factor IX	3551	P00740	NP_000124.1	Haemophilia B	p.GLU73LYS
Matrisome-associated	ECM Regulators	F9	coagulation factor IX	3551	P00740	NP_000124.1	Haemophilia B	p.GLU73VAL
Matrisome-associated	ECM Regulators	F9	coagulation factor IX	3551	P00740	NP_000124.1	Haemophilia B	p.GLU79ASP
Matrisome-associated	ECM Regulators	F9	coagulation factor IX	3551	P00740	NP_000124.1	Haemophilia B	p.GLY106SER
Matrisome-associated	ECM Regulators	F9	coagulation factor IX	3551	P00740	NP_000124.1	Haemophilia B	p.GLY160ALA
Matrisome-associated	ECM Regulators	F9	coagulation factor IX	3551	P00740	NP_000124.1	Haemophilia B	p.GLY355VAL
Matrisome-associated	ECM Regulators	F9	coagulation factor IX	3551	P00740	NP_000124.1	Haemophilia B	p.GLY357ARG
Matrisome-associated	ECM Regulators	F9	coagulation factor IX	3551	P00740	NP_000124.1	Haemophilia B	p.GLY357GLU
Matrisome-associated	ECM Regulators	F9	coagulation factor IX	3551	P00740	NP_000124.1	Haemophilia B	p.GLY409VAL
Matrisome-associated	ECM Regulators	F9	coagulation factor IX	3551	P00740	NP_000124.1	Haemophilia B	p.GLY442ARG
Matrisome-associated	ECM Regulators	F9	coagulation factor IX	3551	P00740	NP_000124.1	Haemophilia B	p.ILE390THR
Matrisome-associated	ECM Regulators	F9	coagulation factor IX	3551	P00740	NP_000124.1	Haemophilia B	p.ILE443THR
Matrisome-associated	ECM Regulators	F9	coagulation factor IX	3551	P00740	NP_000124.1	Haemophilia B	p.LYS457TER
Matrisome-associated	ECM Regulators	F9	coagulation factor IX	3551	P00740	NP_000124.1	Haemophilia B	p.MET394VAL
Matrisome-associated	ECM Regulators	F9	coagulation factor IX	3551	P00740	NP_000124.1	Haemophilia B	p.PRO101ALA
Matrisome-associated	ECM Regulators	F9	coagulation factor IX	3551	P00740	NP_000124.1	Haemophilia B	p.PRO333LEU
Matrisome-associated	ECM Regulators	F9	coagulation factor IX	3551	P00740	NP_000124.1	Haemophilia B	p.PRO414THR
Matrisome-associated	ECM Regulators	F9	coagulation factor IX	3551	P00740	NP_000124.1	Haemophilia B	p.SER406LEU
Matrisome-associated	ECM Regulators	F9	coagulation factor IX	3551	P00740	NP_000124.1	Haemophilia B	p.SER411GLY
Matrisome-associated	ECM Regulators	F9	coagulation factor IX	3551	P00740	NP_000124.1	Haemophilia B	p.SER411ILE
Matrisome-associated	ECM Regulators	F9	coagulation factor IX	3551	P00740	NP_000124.1	Deep venous thrombosis, protection against	p.THR194ALA
Matrisome-associated	ECM Regulators	F9	coagulation factor IX	3551	P00740	NP_000124.1	Haemophilia B	p.THR342MET
Matrisome-associated	ECM Regulators	F9	coagulation factor IX	3551	P00740	NP_000124.1	Haemophilia B	p.TRP453ARG
Matrisome-associated	ECM Regulators	F9	coagulation factor IX	3551	P00740	NP_000124.1	Haemophilia B	p.VAL227PHE
Matrisome-associated	ECM Regulators	F9	coagulation factor IX	3551	P00740	NP_000124.1	Haemophilia B	p.VAL353ALA
Matrisome-associated	ECM Regulators	F9	coagulation factor IX	3551	P00740	NP_000124.1	Haemophilia B	p.VAL374PHE
Matrisome-associated	ECM Regulators	F9	coagulation factor IX	3551	P00740	NP_000124.1	Haemophilia B	p.VAL419GLU
Matrisome-associated	ECM Regulators	F9	coagulation factor IX	3551	P00740	NP_000124.1	Hemophilia B (3)	NA
Matrisome-associated	ECM Regulators	F9	coagulation factor IX	3551	P00740	NP_000124.1	Warfarin sensitivity (3)	NA
Matrisome-associated	ECM Regulators	F9	coagulation factor IX	3551	P00740	NP_000124.1	hemophilia B	NA
Matrisome-associated	ECM Regulators	F9	coagulation factor IX	3551	P00740	NP_000124.1	mild hemophilia B	NA
Matrisome-associated	ECM Regulators	F9	coagulation factor IX	3551	P00740	NP_000124.1	moderately severe hemophilia B	NA
Matrisome-associated	ECM Regulators	F9	coagulation factor IX	3551	P00740	NP_000124.1	severe hemophilia B	NA
Matrisome-associated	ECM Regulators	F9	coagulation factor IX	3551	P00740	NP_000124.1	symptomatic form of hemophilia B in female carriers	NA
Matrisome-associated	ECM Regulators	F9	coagulation factor IX	3551	P00740	NP_000124.1	thrombophilia, X-linked, due to factor 9 defect	NA
Matrisome-associated	ECM Regulators	FAM20A	family with sequence similarity 20, member A	23015	K7EIV7:K7EQL5:Q96MK3	NP_001230675.1:NP_060035.2	amelogenesis imperfecta type 1G	NA
Matrisome-associated	ECM Regulators	FAM20C	family with sequence similarity 20, member C	22140	Q8IXL6	NP_064608.2:XP_005249871.1	RAINE SYNDROME	p.GLY365ARG
Matrisome-associated	ECM Regulators	FAM20C	family with sequence similarity 20, member C	22140	Q8IXL6	NP_064608.2:XP_005249871.1	lethal osteosclerotic bone dysplasia	NA
Matrisome-associated	ECM Regulators	HABP2	hyaluronan binding protein 2	4798	B7Z8Q5:F5H475:Q14520	NP_001171131.1:NP_004123.1	Carotid stenosis	p.GLY534GLU
Matrisome-associated	ECM Regulators	HABP2	hyaluronan binding protein 2	4798	B7Z8Q5:F5H475:Q14520	NP_001171131.1:NP_004123.1	familial papillary or follicular thyroid carcinoma	NA
Matrisome-associated	ECM Regulators	HPSE2	heparanase 2	18374	Q8WWQ2	NP_001159716.1:NP_001159717.1:NP_001159718.1:NP_068600.4	Ochoa syndrome	p.ARG153TER
Matrisome-associated	ECM Regulators	HPSE2	heparanase 2	18374	Q8WWQ2	NP_001159716.1:NP_001159717.1:NP_001159718.1:NP_068600.4	Ochoa syndrome	p.ARG472TER
Matrisome-associated	ECM Regulators	HPSE2	heparanase 2	18374	Q8WWQ2	NP_001159716.1:NP_001159717.1:NP_001159718.1:NP_068600.4	Ochoa syndrome	p.ARG506TER
Matrisome-associated	ECM Regulators	HPSE2	heparanase 2	18374	Q8WWQ2	NP_001159716.1:NP_001159717.1:NP_001159718.1:NP_068600.4	Ochoa syndrome	NA
Matrisome-associated	ECM Regulators	HPSE2	heparanase 2	18374	Q8WWQ2	NP_001159716.1:NP_001159717.1:NP_001159718.1:NP_068600.4	urofacial syndrome type 1	NA
Matrisome-associated	ECM Regulators	HRG	histidine-rich glycoprotein	5181	P04196	NP_000403.1	THPH11	p.GLY103GLU
Matrisome-associated	ECM Regulators	HRG	histidine-rich glycoprotein	5181	P04196	NP_000403.1	Thrombophilia due to HRG deficiency (3)	NA
Matrisome-associated	ECM Regulators	HRG	histidine-rich glycoprotein	5181	P04196	NP_000403.1	hereditary thrombophilia due to congenital histidine-rich (poly-L) glycoprotein deficiency	NA
Matrisome-associated	ECM Regulators	HTRA1	HtrA serine peptidase 1	9476	H0Y7G9:Q92743	NP_002766.1	AND LEUKOENCEPHALOPATHY	p.ARG302TER
Matrisome-associated	ECM Regulators	HTRA1	HtrA serine peptidase 1	9476	H0Y7G9:Q92743	NP_002766.1	AND LEUKOENCEPHALOPATHY	p.ARG370TER
Matrisome-associated	ECM Regulators	HTRA1	HtrA serine peptidase 1	9476	H0Y7G9:Q92743	NP_002766.1	CARASIL	NA
Matrisome-associated	ECM Regulators	HTRA1	HtrA serine peptidase 1	9476	H0Y7G9:Q92743	NP_002766.1	cerebral arteriopathy, autosomal dominant, with subcortical infarcts and leukoencephalopathy, type 2	NA
Matrisome-associated	ECM Regulators	HTRA1	HtrA serine peptidase 1	9476	H0Y7G9:Q92743	NP_002766.1	HTRA1-related autosomal dominant cerebral small vessel disease	NA
Matrisome-associated	ECM Regulators	HYAL1	hyaluronoglucosaminidase 1	5320	C9JB49:C9JRK1:Q12794	NP_149349.2:NP_695013.1:NP_695014.1:NP_695015.1:NP_695017.1	Deficiency of hyaluronoglucosaminidase	p.GLU268LYS
Matrisome-associated	ECM Regulators	HYAL1	hyaluronoglucosaminidase 1	5320	C9JB49:C9JRK1:Q12794	NP_149349.2:NP_695013.1:NP_695014.1:NP_695015.1:NP_695017.1	Mucopolysaccharidosis type IX, 601492 (3)	NA
Matrisome-associated	ECM Regulators	HYAL1	hyaluronoglucosaminidase 1	5320	C9JB49:C9JRK1:Q12794	NP_149349.2:NP_695013.1:NP_695014.1:NP_695015.1:NP_695017.1	mucopolysaccharidosis type 9	NA
Matrisome-associated	ECM Regulators	ITIH4	inter-alpha (globulin) inhibitor H4 (plasma Kallikrein-sensitive glycoprotein)	6169	B7ZKJ8:F5GXQ1:H7C0L5:Q14624	NP_001159921.1:NP_002209.2	Hypercholesterolemia, susceptibility to, 143890 (3)	NA
Matrisome-associated	ECM Regulators	KNG1	kininogen 1	6383	P01042	NP_000884.1:NP_001095886.1:NP_001159923.1	Kininogen deficiency	p.ARG196TER
Matrisome-associated	ECM Regulators	KY	kyphoscoliosis peptidase	26576	B4DGA7:Q8NBH2	NP_848649.3	kyphoscoliosis-lateral tongue atrophy-hereditary spastic paraplegia syndrome	NA
Matrisome-associated	ECM Regulators	KY	kyphoscoliosis peptidase	26576	B4DGA7:Q8NBH2	NP_848649.3	kyphosis-lateral tongue atrophy-myofibrillar myopathy syndrome	NA
Matrisome-associated	ECM Regulators	KY	kyphoscoliosis peptidase	26576	B4DGA7:Q8NBH2	NP_848649.3	myofibrillar myopathy 7	NA
Matrisome-associated	ECM Regulators	LEPRE1	leucine proline-enriched proteoglycan (leprecan) 1	19316	E2QRI1:H7C0D1:H7C2W6:Q32P28	NP_001139761.1:NP_001230175.1:NP_071751.3	Osteogenesis imperfecta type VIII	p.ARG368TER
Matrisome-associated	ECM Regulators	LEPRE1	leucine proline-enriched proteoglycan (leprecan) 1	19316	E2QRI1:H7C0D1:H7C2W6:Q32P28	NP_001139761.1:NP_001230175.1:NP_071751.3	Osteogenesis imperfecta type VIII	p.TYR552TER
Matrisome-associated	ECM Regulators	LOX	lysyl oxidase	6664	H0YAL3:P28300	NP_002308.2	aortic aneurysm, familial thoracic 10	NA
Matrisome-associated	ECM Regulators	LOX	lysyl oxidase	6664	H0YAL3:P28300	NP_002308.2	familial thoracic aortic aneurysm and aortic dissection	NA
Matrisome-associated	ECM Regulators	LOXL1	lysyl oxidase-like 1	6665	H3BUV8:Q08397	NP_005567.2	Exfoliation syndrome, susceptibility to	p.ARG141LEU
Matrisome-associated	ECM Regulators	LOXL1	lysyl oxidase-like 1	6665	H3BUV8:Q08397	NP_005567.2	Exfoliation syndrome, susceptibility to	p.GLY153ASP
Matrisome-associated	ECM Regulators	LOXL3	lysyl oxidase-like 3	13869	B8ZZT6:B9A025:C9J5M1:E7END4:H7C248:P58215	NP_001276093.1:NP_001276094.1:NP_115992.1	autosomal recessive Stickler syndrome	NA
Matrisome-associated	ECM Regulators	LPA	lipoprotein, Lp(a)	6667	P08519	NP_005568.2	LIPOPROTEIN(a) DEFICIENCY, CONGENITAL	p.ARG37TER
Matrisome-associated	ECM Regulators	LPA	lipoprotein, Lp(a)	6667	P08519	NP_005568.2	LPA deficiency, congenital (3)	NA
Matrisome-associated	ECM Regulators	MASP1	mannan-binding lectin serine peptidase 1 (C4/C2 activating component of Ra-reactive factor)	6901	C9J1C7:C9JLU5:C9JMA2:F8W876:P48740	NP_001027019.1:NP_001870.3:NP_624302.1:XP_006713764.1	MC syndrome	NA
Matrisome-associated	ECM Regulators	MASP1	mannan-binding lectin serine peptidase 1 (C4/C2 activating component of Ra-reactive factor)	6901	C9J1C7:C9JLU5:C9JMA2:F8W876:P48740	NP_001027019.1:NP_001870.3:NP_624302.1:XP_006713764.1	MC syndrome 1	NA
Matrisome-associated	ECM Regulators	MASP2	mannan-binding lectin serine peptidase 2	6902	O00187	NP_006601.2:NP_631947.1	Masp2 deficiency	p.ASP120GLY
Matrisome-associated	ECM Regulators	MASP2	mannan-binding lectin serine peptidase 2	6902	O00187	NP_006601.2:NP_631947.1	MASP2 deficiency (3)	NA
Matrisome-associated	ECM Regulators	MASP2	mannan-binding lectin serine peptidase 2	6902	O00187	NP_006601.2:NP_631947.1	immunodeficiency due to MASP-2 deficiency	NA
Matrisome-associated	ECM Regulators	MMP1	matrix metallopeptidase 1 (interstitial collagenase)	7155	P03956	NP_002412.1	COPD, rate of decline of lung function in, 606963 (3)	NA
Matrisome-associated	ECM Regulators	MMP1	matrix metallopeptidase 1 (interstitial collagenase)	7155	P03956	NP_002412.1	COPD, severe early onset	NA
Matrisome-associated	ECM Regulators	MMP13	matrix metallopeptidase 13 (collagenase 3)	7159	G5E971:P45452	NP_002418.1	Metaphyseal anadysplasia	p.HIS232ASN
Matrisome-associated	ECM Regulators	MMP13	matrix metallopeptidase 13 (collagenase 3)	7159	G5E971:P45452	NP_002418.1	Metaphyseal anadysplasia	p.MET91THR
Matrisome-associated	ECM Regulators	MMP13	matrix metallopeptidase 13 (collagenase 3)	7159	G5E971:P45452	NP_002418.1	Metaphyseal anadysplasia	p.PHE74SER
Matrisome-associated	ECM Regulators	MMP13	matrix metallopeptidase 13 (collagenase 3)	7159	G5E971:P45452	NP_002418.1	Spondyloepimetaphyseal dysplasia, missouri type	p.PHE75SER
Matrisome-associated	ECM Regulators	MMP13	matrix metallopeptidase 13 (collagenase 3)	7159	G5E971:P45452	NP_002418.1	metaphyseal anadysplasia	NA
Matrisome-associated	ECM Regulators	MMP13	matrix metallopeptidase 13 (collagenase 3)	7159	G5E971:P45452	NP_002418.1	metaphyseal chondrodysplasia, Spahr type	NA
Matrisome-associated	ECM Regulators	MMP13	matrix metallopeptidase 13 (collagenase 3)	7159	G5E971:P45452	NP_002418.1	spondyloepimetaphyseal dysplasia, Missouri type	NA
Matrisome-associated	ECM Regulators	MMP14	matrix metallopeptidase 14 (membrane-inserted)	7160	F8VP90:F8W1B7:P50281	NP_004986.1	multicentric osteolysis-nodulosis-arthropathy spectrum	NA
Matrisome-associated	ECM Regulators	MMP19	matrix metallopeptidase 19	7165	A6ND33:B4DNP3:F8W1C3:Q99542	NP_001259030.1:NP_002420.1	familial cavitary optic disc anomaly	NA
Matrisome-associated	ECM Regulators	MMP2	matrix metallopeptidase 2 (gelatinase A, 72kDa gelatinase, 72kDa type IV collagenase)	7166	H3BR66:H3BS34:H3BV48:J3KRB7:P08253	NP_001121363.1:NP_004521.1	Torg Winchester syndrome	p.ARG101HIS
Matrisome-associated	ECM Regulators	MMP2	matrix metallopeptidase 2 (gelatinase A, 72kDa gelatinase, 72kDa type IV collagenase)	7166	H3BR66:H3BS34:H3BV48:J3KRB7:P08253	NP_001121363.1:NP_004521.1	Torg Winchester syndrome	p.GLU404LYS
Matrisome-associated	ECM Regulators	MMP2	matrix metallopeptidase 2 (gelatinase A, 72kDa gelatinase, 72kDa type IV collagenase)	7166	H3BR66:H3BS34:H3BV48:J3KRB7:P08253	NP_001121363.1:NP_004521.1	Torg Winchester syndrome	p.TYR244TER
Matrisome-associated	ECM Regulators	MMP2	matrix metallopeptidase 2 (gelatinase A, 72kDa gelatinase, 72kDa type IV collagenase)	7166	H3BR66:H3BS34:H3BV48:J3KRB7:P08253	NP_001121363.1:NP_004521.1	Osteolysis, idiopathic, Saudi type, 605156 (3)	NA
Matrisome-associated	ECM Regulators	MMP2	matrix metallopeptidase 2 (gelatinase A, 72kDa gelatinase, 72kDa type IV collagenase)	7166	H3BR66:H3BS34:H3BV48:J3KRB7:P08253	NP_001121363.1:NP_004521.1	multicentric osteolysis-nodulosis-arthropathy spectrum	NA
Matrisome-associated	ECM Regulators	MMP2	matrix metallopeptidase 2 (gelatinase A, 72kDa gelatinase, 72kDa type IV collagenase)	7166	H3BR66:H3BS34:H3BV48:J3KRB7:P08253	NP_001121363.1:NP_004521.1	multicentric osteolysis, nodulosis, and arthropathy	NA
Matrisome-associated	ECM Regulators	MMP20	matrix metallopeptidase 20	7167	O60882	NP_004762.2	amelogenesis imperfecta hypomaturation type 2A2	NA
Matrisome-associated	ECM Regulators	MMP20	matrix metallopeptidase 20	7167	O60882	NP_004762.2	amelogenesis imperfecta type 2	NA
Matrisome-associated	ECM Regulators	MMP21	matrix metallopeptidase 21	14357	Q8N119	NP_671724.1	heterotaxy, visceral, 7, autosomal	NA
Matrisome-associated	ECM Regulators	MMP21	matrix metallopeptidase 21	14357	Q8N119	NP_671724.1	situs ambiguus	NA
Matrisome-associated	ECM Regulators	MMP21	matrix metallopeptidase 21	14357	Q8N119	NP_671724.1	situs inversus	NA
Matrisome-associated	ECM Regulators	MMP3	matrix metallopeptidase 3 (stromelysin 1, progelatinase)	7173	E9PKX2:H7C139:P08254	NP_002413.1	Coronary heart disease, susceptibility to (3)	NA
Matrisome-associated	ECM Regulators	MMP9	matrix metallopeptidase 9 (gelatinase B, 92kDa gelatinase, 92kDa type IV collagenase)	7176	P14780	NP_004985.2	Metaphyseal anadysplasia	p.MET1LYS
Matrisome-associated	ECM Regulators	MMP9	matrix metallopeptidase 9 (gelatinase B, 92kDa gelatinase, 92kDa type IV collagenase)	7176	P14780	NP_004985.2	metaphyseal anadysplasia	NA
Matrisome-associated	ECM Regulators	MMP9	matrix metallopeptidase 9 (gelatinase B, 92kDa gelatinase, 92kDa type IV collagenase)	7176	P14780	NP_004985.2	metaphyseal anadysplasia 2	NA
Matrisome-associated	ECM Regulators	NGLY1	N-glycanase 1	17646	C9JU75:H0Y2P2:Q96IV0:Q9NV10	NP_001138765.1:NP_001138766.1:NP_001138767.1:NP_060767.2	NGLY1-deficiency	NA
Matrisome-associated	ECM Regulators	P4HA2	prolyl 4-hydroxylase, alpha polypeptide II	8547	A8MXE0:C9JCP0:C9JFJ1:C9JIG4:C9JN43:C9JX45:E7ENX0:E7EPI9:E7ERI1:O15460	NP_001017973.1:NP_001017974.1:NP_001136070.1:NP_001136071.1:NP_004190.1:XP_005272173.1:XP_005272174.1:XP_005272175.1:XP_005272176.1:XP_005272177.1:XP_006714791.1:XP_006714792.1:XP_006714793.1	myopia 25, autosomal dominant	NA
Matrisome-associated	ECM Regulators	PLAT	plasminogen activator, tissue	9051	B4DN26:B4DNJ1:E5RGA1:E5RHG4:E7ESF4:H0YBH9:K4DI88:P00750	NP_000921.1:NP_127509.1	lethal hydranencephaly-diaphragmatic hernia syndrome	NA
Matrisome-associated	ECM Regulators	PLAT	plasminogen activator, tissue	9051	B4DN26:B4DNJ1:E5RGA1:E5RHG4:E7ESF4:H0YBH9:K4DI88:P00750	NP_000921.1:NP_127509.1	THPH9	NA
Matrisome-associated	ECM Regulators	PLAU	plasminogen activator, urokinase	9052	E7ESM2:E7ET40:P00749:S4R3G7	NP_001138503.1:NP_002649.1	Alzheimer disease, late-onset, susceptibility to, 104300 (3)	NA
Matrisome-associated	ECM Regulators	PLAU	plasminogen activator, urokinase	9052	E7ESM2:E7ET40:P00749:S4R3G7	NP_001138503.1:NP_002649.1	Quebec platelet disorder	NA
Matrisome-associated	ECM Regulators	PLG	plasminogen	9071	A6PVI2:P00747:Q5TEH5	NP_000292.1:NP_001161810.1	Dysplasminogenemia	p.ALA620THR
Matrisome-associated	ECM Regulators	PLG	plasminogen	9071	A6PVI2:P00747:Q5TEH5	NP_000292.1:NP_001161810.1	Plasminogen deficiency	p.ARG235HIS
Matrisome-associated	ECM Regulators	PLG	plasminogen	9071	A6PVI2:P00747:Q5TEH5	NP_000292.1:NP_001161810.1	Plasminogen deficiency	p.GLU479TER
Matrisome-associated	ECM Regulators	PLG	plasminogen	9071	A6PVI2:P00747:Q5TEH5	NP_000292.1:NP_001161810.1	Dysplasminogenemia	p.GLY751ARG
Matrisome-associated	ECM Regulators	PLG	plasminogen	9071	A6PVI2:P00747:Q5TEH5	NP_000292.1:NP_001161810.1	Plasminogen deficiency	p.LYS38GLU
Matrisome-associated	ECM Regulators	PLG	plasminogen	9071	A6PVI2:P00747:Q5TEH5	NP_000292.1:NP_001161810.1	Dysplasminogenemia	p.SER591PRO
Matrisome-associated	ECM Regulators	PLG	plasminogen	9071	A6PVI2:P00747:Q5TEH5	NP_000292.1:NP_001161810.1	Plasminogen deficiency	p.TRP616TER
Matrisome-associated	ECM Regulators	PLG	plasminogen	9071	A6PVI2:P00747:Q5TEH5	NP_000292.1:NP_001161810.1	Dysplasminogenemia	p.VAL374PHE
Matrisome-associated	ECM Regulators	PLG	plasminogen	9071	A6PVI2:P00747:Q5TEH5	NP_000292.1:NP_001161810.1	Conjunctivitis, ligneous, 217090 (3)	NA
Matrisome-associated	ECM Regulators	PLG	plasminogen	9071	A6PVI2:P00747:Q5TEH5	NP_000292.1:NP_001161810.1	Plasminogen Tochigi disease (3)	NA
Matrisome-associated	ECM Regulators	PLG	plasminogen	9071	A6PVI2:P00747:Q5TEH5	NP_000292.1:NP_001161810.1	hypoplasminogenemia	NA
Matrisome-associated	ECM Regulators	PLG	plasminogen	9071	A6PVI2:P00747:Q5TEH5	NP_000292.1:NP_001161810.1	ligneous conjunctivitis	NA
Matrisome-associated	ECM Regulators	PLOD1	procollagen-lysine 1, 2-oxoglutarate 5-dioxygenase 1	9081	B4DR87:Q02809:Q5JXB7:Q5JXB8:Q5JXB9	NP_000293.2	Ehlers-Danlos syndrome, hydroxylysine-deficient	p.ARG670TER
Matrisome-associated	ECM Regulators	PLOD1	procollagen-lysine 1, 2-oxoglutarate 5-dioxygenase 1	9081	B4DR87:Q02809:Q5JXB7:Q5JXB8:Q5JXB9	NP_000293.2	EDS6	p.GLY678ARG
Matrisome-associated	ECM Regulators	PLOD1	procollagen-lysine 1, 2-oxoglutarate 5-dioxygenase 1	9081	B4DR87:Q02809:Q5JXB7:Q5JXB8:Q5JXB9	NP_000293.2	EDS6	p.TRP612CYS
Matrisome-associated	ECM Regulators	PLOD1	procollagen-lysine 1, 2-oxoglutarate 5-dioxygenase 1	9081	B4DR87:Q02809:Q5JXB7:Q5JXB8:Q5JXB9	NP_000293.2	Ehlers-Danlos syndrome, hydroxylysine-deficient	p.TYR511TER
Matrisome-associated	ECM Regulators	PLOD1	procollagen-lysine 1, 2-oxoglutarate 5-dioxygenase 1	9081	B4DR87:Q02809:Q5JXB7:Q5JXB8:Q5JXB9	NP_000293.2	Ehlers-Danlos syndrome, type VI, 225400 (3)	NA
Matrisome-associated	ECM Regulators	PLOD1	procollagen-lysine 1, 2-oxoglutarate 5-dioxygenase 1	9081	B4DR87:Q02809:Q5JXB7:Q5JXB8:Q5JXB9	NP_000293.2	Nevo syndrome, 601451 (3)	NA
Matrisome-associated	ECM Regulators	PLOD1	procollagen-lysine 1, 2-oxoglutarate 5-dioxygenase 1	9081	B4DR87:Q02809:Q5JXB7:Q5JXB8:Q5JXB9	NP_000293.2	Ehlers-Danlos syndrome, kyphoscoliotic type	NA
Matrisome-associated	ECM Regulators	PLOD2	procollagen-lysine, 2-oxoglutarate 5-dioxygenase 2	9082	B3KWS3:C9JXZ0:E7ETU9:F8WEW3:O00469	NP_000926.2:NP_891988.1	Bruck syndrome	p.ARG619HIS
Matrisome-associated	ECM Regulators	PLOD2	procollagen-lysine, 2-oxoglutarate 5-dioxygenase 2	9082	B3KWS3:C9JXZ0:E7ETU9:F8WEW3:O00469	NP_000926.2:NP_891988.1	Bruck syndrome	p.GLY622VAL
Matrisome-associated	ECM Regulators	PLOD2	procollagen-lysine, 2-oxoglutarate 5-dioxygenase 2	9082	B3KWS3:C9JXZ0:E7ETU9:F8WEW3:O00469	NP_000926.2:NP_891988.1	Bruck syndrome	p.THR629ILE
Matrisome-associated	ECM Regulators	PLOD2	procollagen-lysine, 2-oxoglutarate 5-dioxygenase 2	9082	B3KWS3:C9JXZ0:E7ETU9:F8WEW3:O00469	NP_000926.2:NP_891988.1	Bruck syndrome 2, 609220 (3)	NA
Matrisome-associated	ECM Regulators	PLOD2	procollagen-lysine, 2-oxoglutarate 5-dioxygenase 2	9082	B3KWS3:C9JXZ0:E7ETU9:F8WEW3:O00469	NP_000926.2:NP_891988.1	Bruck syndrome	NA
Matrisome-associated	ECM Regulators	PLOD2	procollagen-lysine, 2-oxoglutarate 5-dioxygenase 2	9082	B3KWS3:C9JXZ0:E7ETU9:F8WEW3:O00469	NP_000926.2:NP_891988.1	Bruck syndrome 2	NA
Matrisome-associated	ECM Regulators	PLOD3	procollagen-lysine, 2-oxoglutarate 5-dioxygenase 3	9083	C9JIX5:C9JU11:H7C0B8:H7C2A8:H7C2S8:H7C2V1:O60568	NP_001075.1	Bone fragility with contractures, arterial rupture, and deafness	p.ASN223SER
Matrisome-associated	ECM Regulators	PLOD3	procollagen-lysine, 2-oxoglutarate 5-dioxygenase 3	9083	C9JIX5:C9JU11:H7C0B8:H7C2A8:H7C2S8:H7C2V1:O60568	NP_001075.1	connective tissue disorder due to lysyl hydroxylase-3 deficiency	NA
Matrisome-associated	ECM Regulators	PRSS1	protease, serine, 1 (trypsin 1)	9475	E7EQ64:H0Y8D1:P07477	NP_002760.1	Hereditary pancreatitis	p.ARG122CYS
Matrisome-associated	ECM Regulators	PRSS1	protease, serine, 1 (trypsin 1)	9475	E7EQ64:H0Y8D1:P07477	NP_002760.1	Hereditary pancreatitis	p.ARG122HIS
Matrisome-associated	ECM Regulators	PRSS1	protease, serine, 1 (trypsin 1)	9475	E7EQ64:H0Y8D1:P07477	NP_002760.1	Hereditary pancreatitis	p.ASN29ILE
Matrisome-associated	ECM Regulators	PRSS1	protease, serine, 1 (trypsin 1)	9475	E7EQ64:H0Y8D1:P07477	NP_002760.1	Hereditary pancreatitis	p.ASN54SER
Matrisome-associated	ECM Regulators	PRSS1	protease, serine, 1 (trypsin 1)	9475	E7EQ64:H0Y8D1:P07477	NP_002760.1	Hereditary pancreatitis	p.GLU79LYS
Matrisome-associated	ECM Regulators	PRSS1	protease, serine, 1 (trypsin 1)	9475	E7EQ64:H0Y8D1:P07477	NP_002760.1	Hereditary pancreatitis	p.LYS23ARG
Matrisome-associated	ECM Regulators	PRSS1	protease, serine, 1 (trypsin 1)	9475	E7EQ64:H0Y8D1:P07477	NP_002760.1	Hereditary pancreatitis	p.PRO133ARG
Matrisome-associated	ECM Regulators	PRSS1	protease, serine, 1 (trypsin 1)	9475	E7EQ64:H0Y8D1:P07477	NP_002760.1	Hereditary pancreatitis	p.THR130ILE
Matrisome-associated	ECM Regulators	PRSS1	protease, serine, 1 (trypsin 1)	9475	E7EQ64:H0Y8D1:P07477	NP_002760.1	Pancreatitis, hereditary, 167800 (3)	NA
Matrisome-associated	ECM Regulators	PRSS1	protease, serine, 1 (trypsin 1)	9475	E7EQ64:H0Y8D1:P07477	NP_002760.1	hereditary chronic pancreatitis	NA
Matrisome-associated	ECM Regulators	PRSS1	protease, serine, 1 (trypsin 1)	9475	E7EQ64:H0Y8D1:P07477	NP_002760.1	recurrent acute pancreatitis	NA
Matrisome-associated	ECM Regulators	PRSS1	protease, serine, 1 (trypsin 1)	9475	E7EQ64:H0Y8D1:P07477	NP_002760.1	trypsinogen deficiency	NA
Matrisome-associated	ECM Regulators	PRSS12	protease, serine, 12 (neurotrypsin, motopsin)	9477	P56730	NP_003610.2	Mental retardation, nonsyndromic, autosomal recessive, 249500 (3)	NA
Matrisome-associated	ECM Regulators	PRSS12	protease, serine, 12 (neurotrypsin, motopsin)	9477	P56730	NP_003610.2	autosomal recessive non-syndromic intellectual disability	NA
Matrisome-associated	ECM Regulators	PRSS12	protease, serine, 12 (neurotrypsin, motopsin)	9477	P56730	NP_003610.2	intellectual disability, autosomal recessive 1	NA
Matrisome-associated	ECM Regulators	SERPINA1	serpin peptidase inhibitor, clade A (alpha-1 antiproteinase, antitrypsin), member 1	8941	G3V2B9:G3V387:G3V4I7:G3V544:G3V5R8:P01009	NP_000286.3:NP_001002235.1:NP_001002236.1:NP_001121172.1:NP_001121173.1:NP_001121174.1:NP_001121175.1:NP_001121176.1:NP_001121177.1:NP_001121178.1:NP_001121179.1	Antitrypsin alpha 1 deficiency	p.ALA360THR
Matrisome-associated	ECM Regulators	SERPINA1	serpin peptidase inhibitor, clade A (alpha-1 antiproteinase, antitrypsin), member 1	8941	G3V2B9:G3V387:G3V4I7:G3V544:G3V5R8:P01009	NP_000286.3:NP_001002235.1:NP_001002236.1:NP_001121172.1:NP_001121173.1:NP_001121174.1:NP_001121175.1:NP_001121176.1:NP_001121177.1:NP_001121178.1:NP_001121179.1	PI M2	p.ARG125HIS
Matrisome-associated	ECM Regulators	SERPINA1	serpin peptidase inhibitor, clade A (alpha-1 antiproteinase, antitrypsin), member 1	8941	G3V2B9:G3V387:G3V4I7:G3V544:G3V5R8:P01009	NP_000286.3:NP_001002235.1:NP_001002236.1:NP_001121172.1:NP_001121173.1:NP_001121174.1:NP_001121175.1:NP_001121176.1:NP_001121177.1:NP_001121178.1:NP_001121179.1	Antitrypsin alpha 1 deficiency	p.ARG247CYS
Matrisome-associated	ECM Regulators	SERPINA1	serpin peptidase inhibitor, clade A (alpha-1 antiproteinase, antitrypsin), member 1	8941	G3V2B9:G3V387:G3V4I7:G3V544:G3V5R8:P01009	NP_000286.3:NP_001002235.1:NP_001002236.1:NP_001121172.1:NP_001121173.1:NP_001121174.1:NP_001121175.1:NP_001121176.1:NP_001121177.1:NP_001121178.1:NP_001121179.1	Antitrypsin alpha 1 deficiency	p.ARG63CYS
Matrisome-associated	ECM Regulators	SERPINA1	serpin peptidase inhibitor, clade A (alpha-1 antiproteinase, antitrypsin), member 1	8941	G3V2B9:G3V387:G3V4I7:G3V544:G3V5R8:P01009	NP_000286.3:NP_001002235.1:NP_001002236.1:NP_001121172.1:NP_001121173.1:NP_001121174.1:NP_001121175.1:NP_001121176.1:NP_001121177.1:NP_001121178.1:NP_001121179.1	PI V(MUNICH)	p.ASP26ALA
Matrisome-associated	ECM Regulators	SERPINA1	serpin peptidase inhibitor, clade A (alpha-1 antiproteinase, antitrypsin), member 1	8941	G3V2B9:G3V387:G3V4I7:G3V544:G3V5R8:P01009	NP_000286.3:NP_001002235.1:NP_001002236.1:NP_001121172.1:NP_001121173.1:NP_001121174.1:NP_001121175.1:NP_001121176.1:NP_001121177.1:NP_001121178.1:NP_001121179.1	Antitrypsin alpha 1 deficiency	p.ASP280VAL
Matrisome-associated	ECM Regulators	SERPINA1	serpin peptidase inhibitor, clade A (alpha-1 antiproteinase, antitrypsin), member 1	8941	G3V2B9:G3V387:G3V4I7:G3V544:G3V5R8:P01009	NP_000286.3:NP_001002235.1:NP_001002236.1:NP_001121172.1:NP_001121173.1:NP_001121174.1:NP_001121175.1:NP_001121176.1:NP_001121177.1:NP_001121178.1:NP_001121179.1	Antitrypsin alpha 1 deficiency	p.GLU228LYS
Matrisome-associated	ECM Regulators	SERPINA1	serpin peptidase inhibitor, clade A (alpha-1 antiproteinase, antitrypsin), member 1	8941	G3V2B9:G3V387:G3V4I7:G3V544:G3V5R8:P01009	NP_000286.3:NP_001002235.1:NP_001002236.1:NP_001121172.1:NP_001121173.1:NP_001121174.1:NP_001121175.1:NP_001121176.1:NP_001121177.1:NP_001121178.1:NP_001121179.1	Antitrypsin alpha 1 deficiency	p.GLU288VAL
Matrisome-associated	ECM Regulators	SERPINA1	serpin peptidase inhibitor, clade A (alpha-1 antiproteinase, antitrypsin), member 1	8941	G3V2B9:G3V387:G3V4I7:G3V544:G3V5R8:P01009	NP_000286.3:NP_001002235.1:NP_001002236.1:NP_001121172.1:NP_001121173.1:NP_001121174.1:NP_001121175.1:NP_001121176.1:NP_001121177.1:NP_001121178.1:NP_001121179.1	Antitrypsin alpha 1 deficiency	p.GLU366LYS
Matrisome-associated	ECM Regulators	SERPINA1	serpin peptidase inhibitor, clade A (alpha-1 antiproteinase, antitrypsin), member 1	8941	G3V2B9:G3V387:G3V4I7:G3V544:G3V5R8:P01009	NP_000286.3:NP_001002235.1:NP_001002236.1:NP_001121172.1:NP_001121173.1:NP_001121174.1:NP_001121175.1:NP_001121176.1:NP_001121177.1:NP_001121178.1:NP_001121179.1	PI CHRISTCHURCH	p.GLU387LYS
Matrisome-associated	ECM Regulators	SERPINA1	serpin peptidase inhibitor, clade A (alpha-1 antiproteinase, antitrypsin), member 1	8941	G3V2B9:G3V387:G3V4I7:G3V544:G3V5R8:P01009	NP_000286.3:NP_001002235.1:NP_001002236.1:NP_001121172.1:NP_001121173.1:NP_001121174.1:NP_001121175.1:NP_001121176.1:NP_001121177.1:NP_001121178.1:NP_001121179.1	PI M3	p.GLU400ASP
Matrisome-associated	ECM Regulators	SERPINA1	serpin peptidase inhibitor, clade A (alpha-1 antiproteinase, antitrypsin), member 1	8941	G3V2B9:G3V387:G3V4I7:G3V544:G3V5R8:P01009	NP_000286.3:NP_001002235.1:NP_001002236.1:NP_001121172.1:NP_001121173.1:NP_001121174.1:NP_001121175.1:NP_001121176.1:NP_001121177.1:NP_001121178.1:NP_001121179.1	Antitrypsin alpha 1 deficiency	p.GLY139SER
Matrisome-associated	ECM Regulators	SERPINA1	serpin peptidase inhibitor, clade A (alpha-1 antiproteinase, antitrypsin), member 1	8941	G3V2B9:G3V387:G3V4I7:G3V544:G3V5R8:P01009	NP_000286.3:NP_001002235.1:NP_001002236.1:NP_001121172.1:NP_001121173.1:NP_001121174.1:NP_001121175.1:NP_001121176.1:NP_001121177.1:NP_001121178.1:NP_001121179.1	Antitrypsin alpha 1 deficiency	p.GLY91GLU
Matrisome-associated	ECM Regulators	SERPINA1	serpin peptidase inhibitor, clade A (alpha-1 antiproteinase, antitrypsin), member 1	8941	G3V2B9:G3V387:G3V4I7:G3V544:G3V5R8:P01009	NP_000286.3:NP_001002235.1:NP_001002236.1:NP_001121172.1:NP_001121173.1:NP_001121174.1:NP_001121175.1:NP_001121176.1:NP_001121177.1:NP_001121178.1:NP_001121179.1	Antitrypsin alpha 1 deficiency	p.ILE116ASN
Matrisome-associated	ECM Regulators	SERPINA1	serpin peptidase inhibitor, clade A (alpha-1 antiproteinase, antitrypsin), member 1	8941	G3V2B9:G3V387:G3V4I7:G3V544:G3V5R8:P01009	NP_000286.3:NP_001002235.1:NP_001002236.1:NP_001121172.1:NP_001121173.1:NP_001121174.1:NP_001121175.1:NP_001121176.1:NP_001121177.1:NP_001121178.1:NP_001121179.1	PI NULL(MATTAWA)	p.LEU377PHE
Matrisome-associated	ECM Regulators	SERPINA1	serpin peptidase inhibitor, clade A (alpha-1 antiproteinase, antitrypsin), member 1	8941	G3V2B9:G3V387:G3V4I7:G3V544:G3V5R8:P01009	NP_000286.3:NP_001002235.1:NP_001002236.1:NP_001121172.1:NP_001121173.1:NP_001121174.1:NP_001121175.1:NP_001121176.1:NP_001121177.1:NP_001121178.1:NP_001121179.1	Antitrypsin alpha 1 deficiency	p.LEU65PRO
Matrisome-associated	ECM Regulators	SERPINA1	serpin peptidase inhibitor, clade A (alpha-1 antiproteinase, antitrypsin), member 1	8941	G3V2B9:G3V387:G3V4I7:G3V544:G3V5R8:P01009	NP_000286.3:NP_001002235.1:NP_001002236.1:NP_001121172.1:NP_001121173.1:NP_001121174.1:NP_001121175.1:NP_001121176.1:NP_001121177.1:NP_001121178.1:NP_001121179.1	Antitrypsin alpha 1 deficiency	p.LYS241TER
Matrisome-associated	ECM Regulators	SERPINA1	serpin peptidase inhibitor, clade A (alpha-1 antiproteinase, antitrypsin), member 1	8941	G3V2B9:G3V387:G3V4I7:G3V544:G3V5R8:P01009	NP_000286.3:NP_001002235.1:NP_001002236.1:NP_001121172.1:NP_001121173.1:NP_001121174.1:NP_001121175.1:NP_001121176.1:NP_001121177.1:NP_001121178.1:NP_001121179.1	Antitrypsin alpha 1 deficiency	p.MET382ARG
Matrisome-associated	ECM Regulators	SERPINA1	serpin peptidase inhibitor, clade A (alpha-1 antiproteinase, antitrypsin), member 1	8941	G3V2B9:G3V387:G3V4I7:G3V544:G3V5R8:P01009	NP_000286.3:NP_001002235.1:NP_001002236.1:NP_001121172.1:NP_001121173.1:NP_001121174.1:NP_001121175.1:NP_001121176.1:NP_001121177.1:NP_001121178.1:NP_001121179.1	Antitrypsin alpha 1 deficiency	p.PRO393LEU
Matrisome-associated	ECM Regulators	SERPINA1	serpin peptidase inhibitor, clade A (alpha-1 antiproteinase, antitrypsin), member 1	8941	G3V2B9:G3V387:G3V4I7:G3V544:G3V5R8:P01009	NP_000286.3:NP_001002235.1:NP_001002236.1:NP_001121172.1:NP_001121173.1:NP_001121174.1:NP_001121175.1:NP_001121176.1:NP_001121177.1:NP_001121178.1:NP_001121179.1	Antitrypsin alpha 1 deficiency	p.SER77PHE
Matrisome-associated	ECM Regulators	SERPINA1	serpin peptidase inhibitor, clade A (alpha-1 antiproteinase, antitrypsin), member 1	8941	G3V2B9:G3V387:G3V4I7:G3V544:G3V5R8:P01009	NP_000286.3:NP_001002235.1:NP_001002236.1:NP_001121172.1:NP_001121173.1:NP_001121174.1:NP_001121175.1:NP_001121176.1:NP_001121177.1:NP_001121178.1:NP_001121179.1	Antitrypsin alpha 1 deficiency	p.THR109MET
Matrisome-associated	ECM Regulators	SERPINA1	serpin peptidase inhibitor, clade A (alpha-1 antiproteinase, antitrypsin), member 1	8941	G3V2B9:G3V387:G3V4I7:G3V544:G3V5R8:P01009	NP_000286.3:NP_001002235.1:NP_001002236.1:NP_001121172.1:NP_001121173.1:NP_001121174.1:NP_001121175.1:NP_001121176.1:NP_001121177.1:NP_001121178.1:NP_001121179.1	PI M1-ALA213	p.VAL237ALA
Matrisome-associated	ECM Regulators	SERPINA1	serpin peptidase inhibitor, clade A (alpha-1 antiproteinase, antitrypsin), member 1	8941	G3V2B9:G3V387:G3V4I7:G3V544:G3V5R8:P01009	NP_000286.3:NP_001002235.1:NP_001002236.1:NP_001121172.1:NP_001121173.1:NP_001121174.1:NP_001121175.1:NP_001121176.1:NP_001121177.1:NP_001121178.1:NP_001121179.1	alpha 1-antitrypsin deficiency	NA
Matrisome-associated	ECM Regulators	SERPINA1	serpin peptidase inhibitor, clade A (alpha-1 antiproteinase, antitrypsin), member 1	8941	G3V2B9:G3V387:G3V4I7:G3V544:G3V5R8:P01009	NP_000286.3:NP_001002235.1:NP_001002236.1:NP_001121172.1:NP_001121173.1:NP_001121174.1:NP_001121175.1:NP_001121176.1:NP_001121177.1:NP_001121178.1:NP_001121179.1	hemorrhagic disease due to alpha-1-antitrypsin Pittsburgh mutation	NA
Matrisome-associated	ECM Regulators	SERPINA10	serpin peptidase inhibitor, clade A (alpha-1 antiproteinase, antitrypsin), member 10	15996	G3V2W1:Q9UK55	NP_001094077.1:NP_057270.1:XP_005267790.1:XP_006725227.1:XP_006720222.1:XP_006725226.1	Venous thromboembolic disease	p.TRP324TER
Matrisome-associated	ECM Regulators	SERPINA10	serpin peptidase inhibitor, clade A (alpha-1 antiproteinase, antitrypsin), member 10	15996	G3V2W1:Q9UK55	NP_001094077.1:NP_057270.1:XP_005267790.1:XP_006725227.1:XP_006720222.1:XP_006725226.1	Venous thrombosis, susceptibility to (3)	NA
Matrisome-associated	ECM Regulators	SERPINA3	serpin peptidase inhibitor, clade A (alpha-1 antiproteinase, antitrypsin), member 3	16	G3V3A0:G3V595:P01011	NP_001076.2	Antichymotrypsin Bochum 1	p.LEU78PRO
Matrisome-associated	ECM Regulators	SERPINA3	serpin peptidase inhibitor, clade A (alpha-1 antiproteinase, antitrypsin), member 3	16	G3V3A0:G3V595:P01011	NP_001076.2	Antichymotrypsin Isehara 1	p.MET414VAL
Matrisome-associated	ECM Regulators	SERPINA3	serpin peptidase inhibitor, clade A (alpha-1 antiproteinase, antitrypsin), member 3	16	G3V3A0:G3V595:P01011	NP_001076.2	Antichymotrypsin bonn 1	p.PRO252ALA
Matrisome-associated	ECM Regulators	SERPINA3	serpin peptidase inhibitor, clade A (alpha-1 antiproteinase, antitrypsin), member 3	16	G3V3A0:G3V595:P01011	NP_001076.2	Alpha-1-antichymotrypsin deficiency (3)	NA
Matrisome-associated	ECM Regulators	SERPINA3	serpin peptidase inhibitor, clade A (alpha-1 antiproteinase, antitrypsin), member 3	16	G3V3A0:G3V595:P01011	NP_001076.2	Cerebrovascular disease, occlusive (3)	NA
Matrisome-associated	ECM Regulators	SERPINA6	serpin peptidase inhibitor, clade A (alpha-1 antiproteinase, antitrypsin), member 6	1540	G3V350:G3V4V7:P08185	NP_001747.2	corticosteroid-binding globulin deficiency	NA
Matrisome-associated	ECM Regulators	SERPINA7	serpin peptidase inhibitor, clade A (alpha-1 antiproteinase, antitrypsin), member 7	11583	P05543	NP_000345.2	Thyroxine-binding globulin deficiency	p.ALA133PRO
Matrisome-associated	ECM Regulators	SERPINA7	serpin peptidase inhibitor, clade A (alpha-1 antiproteinase, antitrypsin), member 7	11583	P05543	NP_000345.2	Thyroxine-binding globulin deficiency	p.ALA211THR
Matrisome-associated	ECM Regulators	SERPINA7	serpin peptidase inhibitor, clade A (alpha-1 antiproteinase, antitrypsin), member 7	11583	P05543	NP_000345.2	Thyroxine-binding globulin, slow	p.ASP191ASN
Matrisome-associated	ECM Regulators	SERPINA7	serpin peptidase inhibitor, clade A (alpha-1 antiproteinase, antitrypsin), member 7	11583	P05543	NP_000345.2	Thyroxine-binding globulin deficiency	p.HIS351TYR
Matrisome-associated	ECM Regulators	SERPINA7	serpin peptidase inhibitor, clade A (alpha-1 antiproteinase, antitrypsin), member 7	11583	P05543	NP_000345.2	Thyroxine-binding globulin deficiency	p.ILE116ASN
Matrisome-associated	ECM Regulators	SERPINA7	serpin peptidase inhibitor, clade A (alpha-1 antiproteinase, antitrypsin), member 7	11583	P05543	NP_000345.2	Thyroxine-binding globulin deficiency	p.LEU247PRO
Matrisome-associated	ECM Regulators	SERPINA7	serpin peptidase inhibitor, clade A (alpha-1 antiproteinase, antitrypsin), member 7	11583	P05543	NP_000345.2	Thyroxine-binding globulin deficiency	p.LEU303PHE
Matrisome-associated	ECM Regulators	SERPINA7	serpin peptidase inhibitor, clade A (alpha-1 antiproteinase, antitrypsin), member 7	11583	P05543	NP_000345.2	Thyroxine-binding globulin deficiency	p.PRO383LEU
Matrisome-associated	ECM Regulators	SERPINA7	serpin peptidase inhibitor, clade A (alpha-1 antiproteinase, antitrypsin), member 7	11583	P05543	NP_000345.2	Thyroxine-binding globulin deficiency	p.TRP300TER
Matrisome-associated	ECM Regulators	SERPINA7	serpin peptidase inhibitor, clade A (alpha-1 antiproteinase, antitrypsin), member 7	11583	P05543	NP_000345.2	Thyroxine-binding globulin deficiency	p.TYR329PHE
Matrisome-associated	ECM Regulators	SERPINB6	serpin peptidase inhibitor, clade B (ovalbumin), member 6	8950	P35237	NP_001182220.2:NP_001258751.1:NP_001258752.1:NP_001258753.1:NP_001258754.1:NP_004559.4	DEAFNESS, AUTOSOMAL RECESSIVE 91	p.GLU245TER
Matrisome-associated	ECM Regulators	SERPINB6	serpin peptidase inhibitor, clade B (ovalbumin), member 6	8950	P35237	NP_001182220.2:NP_001258751.1:NP_001258752.1:NP_001258753.1:NP_001258754.1:NP_004559.4	autosomal recessive nonsyndromic deafness	NA
Matrisome-associated	ECM Regulators	SERPINB7	serpin peptidase inhibitor, clade B (ovalbumin), member 7	13902	C9JA68:C9JM00:C9JZR8:O75635	NP_001035237.1:NP_001248759.1:NP_001248760.1:NP_003775.1:XP_006722625.1	palmoplantar keratoderma, Nagashima type	NA
Matrisome-associated	ECM Regulators	SERPINB8	serpin peptidase inhibitor, clade B (ovalbumin), member 8	8952	C9JTJ8:C9JVA8:H7BXK7:P50452	NP_001027018.1:NP_001263419.1:NP_002631.3:NP_942130.1	exfoliative ichthyosis	NA
Matrisome-associated	ECM Regulators	SERPINB8	serpin peptidase inhibitor, clade B (ovalbumin), member 8	8952	C9JTJ8:C9JVA8:H7BXK7:P50452	NP_001027018.1:NP_001263419.1:NP_002631.3:NP_942130.1	peeling skin syndrome 5	NA
Matrisome-associated	ECM Regulators	SERPINC1	serpin peptidase inhibitor, clade C (antithrombin), member 1	775	P01008	NP_000479.1	Antithrombin deficiency	p.ALA416SER
Matrisome-associated	ECM Regulators	SERPINC1	serpin peptidase inhibitor, clade C (antithrombin), member 1	775	P01008	NP_000479.1	Antithrombin deficiency	p.ARG161TER
Matrisome-associated	ECM Regulators	SERPINC1	serpin peptidase inhibitor, clade C (antithrombin), member 1	775	P01008	NP_000479.1	Antithrombin deficiency	p.ARG425PRO
Matrisome-associated	ECM Regulators	SERPINC1	serpin peptidase inhibitor, clade C (antithrombin), member 1	775	P01008	NP_000479.1	Antithrombin deficiency	p.ARG79CYS
Matrisome-associated	ECM Regulators	SERPINC1	serpin peptidase inhibitor, clade C (antithrombin), member 1	775	P01008	NP_000479.1	Antithrombin deficiency	p.ASN167THR
Matrisome-associated	ECM Regulators	SERPINC1	serpin peptidase inhibitor, clade C (antithrombin), member 1	775	P01008	NP_000479.1	antithrombin III deficiency	NA
Matrisome-associated	ECM Regulators	SERPIND1	serpin peptidase inhibitor, clade D (heparin cofactor), member 1	4838	P05546	NP_000176.2:XP_005261654.1	Heparin cofactor II deficiency	p.ARG208HIS
Matrisome-associated	ECM Regulators	SERPIND1	serpin peptidase inhibitor, clade D (heparin cofactor), member 1	4838	P05546	NP_000176.2:XP_005261654.1	Heparin cofactor II deficiency	p.PRO462LEU
Matrisome-associated	ECM Regulators	SERPIND1	serpin peptidase inhibitor, clade D (heparin cofactor), member 1	4838	P05546	NP_000176.2:XP_005261654.1	Thrombophilia due to heparin cofactor II deficiency (3)	NA
Matrisome-associated	ECM Regulators	SERPIND1	serpin peptidase inhibitor, clade D (heparin cofactor), member 1	4838	P05546	NP_000176.2:XP_005261654.1	heparin cofactor 2 deficiency	NA
Matrisome-associated	ECM Regulators	SERPINE1	serpin peptidase inhibitor, clade E (nexin, plasminogen activator inhibitor type 1), member 1	8583	P05121	NP_000593.1	PLASMINOGEN ACTIVATOR INHIBITOR-1 DEFICIENCY	p.ALA15THR
Matrisome-associated	ECM Regulators	SERPINE1	serpin peptidase inhibitor, clade E (nexin, plasminogen activator inhibitor type 1), member 1	8583	P05121	NP_000593.1	congenital plasminogen activator inhibitor type 1 deficiency	NA
Matrisome-associated	ECM Regulators	SERPINF1	serpin peptidase inhibitor, clade F (alpha-2 antiplasmin, pigment epithelium derived factor), member 1	8824	I3L107:I3L1U4:I3L2R7:I3L3Z3:I3L425:I3L4F9:I3L4N7:I3L4Z0:P36955	NP_002606.3	Osteogenesis imperfecta	p.GLN378TER
Matrisome-associated	ECM Regulators	SERPINF1	serpin peptidase inhibitor, clade F (alpha-2 antiplasmin, pigment epithelium derived factor), member 1	8824	I3L107:I3L1U4:I3L2R7:I3L3Z3:I3L425:I3L4F9:I3L4N7:I3L4Z0:P36955	NP_002606.3	Osteogenesis imperfecta	p.TYR232TER
Matrisome-associated	ECM Regulators	SERPINF1	serpin peptidase inhibitor, clade F (alpha-2 antiplasmin, pigment epithelium derived factor), member 1	8824	I3L107:I3L1U4:I3L2R7:I3L3Z3:I3L425:I3L4F9:I3L4N7:I3L4Z0:P36955	NP_002606.3	osteogenesis imperfecta type 3	NA
Matrisome-associated	ECM Regulators	SERPINF1	serpin peptidase inhibitor, clade F (alpha-2 antiplasmin, pigment epithelium derived factor), member 1	8824	I3L107:I3L1U4:I3L2R7:I3L3Z3:I3L425:I3L4F9:I3L4N7:I3L4Z0:P36955	NP_002606.3	osteogenesis imperfecta type 4	NA
Matrisome-associated	ECM Regulators	SERPINF1	serpin peptidase inhibitor, clade F (alpha-2 antiplasmin, pigment epithelium derived factor), member 1	8824	I3L107:I3L1U4:I3L2R7:I3L3Z3:I3L425:I3L4F9:I3L4N7:I3L4Z0:P36955	NP_002606.3	osteogenesis imperfecta type 6	NA
Matrisome-associated	ECM Regulators	SERPINF2	serpin peptidase inhibitor, clade F (alpha-2 antiplasmin, pigment epithelium derived factor), member 2	9075	C9JMH6:C9JPV4:P08697	NP_000925.2:NP_001159392.1:NP_001159393.1:XP_005256758.1	Alpha-2-plasmin inhibitor deficiency	p.VAL411MET
Matrisome-associated	ECM Regulators	SERPINF2	serpin peptidase inhibitor, clade F (alpha-2 antiplasmin, pigment epithelium derived factor), member 2	9075	C9JMH6:C9JPV4:P08697	NP_000925.2:NP_001159392.1:NP_001159393.1:XP_005256758.1	Plasmin inhibitor deficiency (3)	NA
Matrisome-associated	ECM Regulators	SERPINF2	serpin peptidase inhibitor, clade F (alpha-2 antiplasmin, pigment epithelium derived factor), member 2	9075	C9JMH6:C9JPV4:P08697	NP_000925.2:NP_001159392.1:NP_001159393.1:XP_005256758.1	alpha-2-plasmin inhibitor deficiency	NA
Matrisome-associated	ECM Regulators	SERPING1	serpin peptidase inhibitor, clade G (C1 inhibitor), member 1	1228	B4E1F0:B4E1H2:B5MCB9:C9JZJ9:E9PGN7:E9PK97:H0YCA1:H9KV48:P05155	NP_000053.2:NP_001027466.1	Angioneurotic oedema	p.ALA458THR
Matrisome-associated	ECM Regulators	SERPING1	serpin peptidase inhibitor, clade G (C1 inhibitor), member 1	1228	B4E1F0:B4E1H2:B5MCB9:C9JZJ9:E9PGN7:E9PK97:H0YCA1:H9KV48:P05155	NP_000053.2:NP_001027466.1	Angioneurotic oedema	p.ALA465VAL
Matrisome-associated	ECM Regulators	SERPING1	serpin peptidase inhibitor, clade G (C1 inhibitor), member 1	1228	B4E1F0:B4E1H2:B5MCB9:C9JZJ9:E9PGN7:E9PK97:H0YCA1:H9KV48:P05155	NP_000053.2:NP_001027466.1	Angioneurotic oedema	p.ARG466HIS
Matrisome-associated	ECM Regulators	SERPING1	serpin peptidase inhibitor, clade G (C1 inhibitor), member 1	1228	B4E1F0:B4E1H2:B5MCB9:C9JZJ9:E9PGN7:E9PK97:H0YCA1:H9KV48:P05155	NP_000053.2:NP_001027466.1	Angioneurotic oedema	p.ARG466SER
Matrisome-associated	ECM Regulators	SERPING1	serpin peptidase inhibitor, clade G (C1 inhibitor), member 1	1228	B4E1F0:B4E1H2:B5MCB9:C9JZJ9:E9PGN7:E9PK97:H0YCA1:H9KV48:P05155	NP_000053.2:NP_001027466.1	ANGIOEDEMA, HEREDITARY, TYPE I	p.TYR199TER
Matrisome-associated	ECM Regulators	SERPING1	serpin peptidase inhibitor, clade G (C1 inhibitor), member 1	1228	B4E1F0:B4E1H2:B5MCB9:C9JZJ9:E9PGN7:E9PK97:H0YCA1:H9KV48:P05155	NP_000053.2:NP_001027466.1	Angioneurotic oedema	p.VAL454GLU
Matrisome-associated	ECM Regulators	SERPING1	serpin peptidase inhibitor, clade G (C1 inhibitor), member 1	1228	B4E1F0:B4E1H2:B5MCB9:C9JZJ9:E9PGN7:E9PK97:H0YCA1:H9KV48:P05155	NP_000053.2:NP_001027466.1	Angioedema, hereditary, 106100 (3)	NA
Matrisome-associated	ECM Regulators	SERPING1	serpin peptidase inhibitor, clade G (C1 inhibitor), member 1	1228	B4E1F0:B4E1H2:B5MCB9:C9JZJ9:E9PGN7:E9PK97:H0YCA1:H9KV48:P05155	NP_000053.2:NP_001027466.1	angioedema, hereditary, type 1/2	NA
Matrisome-associated	ECM Regulators	SERPING1	serpin peptidase inhibitor, clade G (C1 inhibitor), member 1	1228	B4E1F0:B4E1H2:B5MCB9:C9JZJ9:E9PGN7:E9PK97:H0YCA1:H9KV48:P05155	NP_000053.2:NP_001027466.1	C1 inhibitor deficiency	NA
Matrisome-associated	ECM Regulators	SERPING1	serpin peptidase inhibitor, clade G (C1 inhibitor), member 1	1228	B4E1F0:B4E1H2:B5MCB9:C9JZJ9:E9PGN7:E9PK97:H0YCA1:H9KV48:P05155	NP_000053.2:NP_001027466.1	hereditary angioedema type 1	NA
Matrisome-associated	ECM Regulators	SERPING1	serpin peptidase inhibitor, clade G (C1 inhibitor), member 1	1228	B4E1F0:B4E1H2:B5MCB9:C9JZJ9:E9PGN7:E9PK97:H0YCA1:H9KV48:P05155	NP_000053.2:NP_001027466.1	hereditary angioedema type 2	NA
Matrisome-associated	ECM Regulators	SERPINH1	serpin peptidase inhibitor, clade H (heat shock protein 47), member 1, (collagen binding protein 1)	1546	E9PIG2:E9PJH8:E9PK86:E9PKH2:E9PLA6:E9PMI5:E9PNX1:E9PPV6:E9PQ34:E9PR70:E9PRS3:H0YEP8:P50454	NP_001193943.1:NP_001226.2:XP_006718790.1:XP_006718791.1:XP_006718792.1	osteogenesis imperfecta type 10	NA
Matrisome-associated	ECM Regulators	SERPINH1	serpin peptidase inhibitor, clade H (heat shock protein 47), member 1, (collagen binding protein 1)	1546	E9PIG2:E9PJH8:E9PK86:E9PKH2:E9PLA6:E9PMI5:E9PNX1:E9PPV6:E9PQ34:E9PR70:E9PRS3:H0YEP8:P50454	NP_001193943.1:NP_001226.2:XP_006718790.1:XP_006718791.1:XP_006718792.1	osteogenesis imperfecta type 3	NA
Matrisome-associated	ECM Regulators	SERPINI1	serpin peptidase inhibitor, clade I (neuroserpin), member 1	8943	C9JDY5:C9JQU8:H7C5T9:Q99574	NP_001116224.1:NP_005016.1:XP_006713720.1	ENCEPHALOPATHY, FAMILIAL, WITH NEUROSERPIN INCLUSION BODIES	p.GLY392ARG
Matrisome-associated	ECM Regulators	SERPINI1	serpin peptidase inhibitor, clade I (neuroserpin), member 1	8943	C9JDY5:C9JQU8:H7C5T9:Q99574	NP_001116224.1:NP_005016.1:XP_006713720.1	Dementia, familial	p.GLY392GLU
Matrisome-associated	ECM Regulators	SERPINI1	serpin peptidase inhibitor, clade I (neuroserpin), member 1	8943	C9JDY5:C9JQU8:H7C5T9:Q99574	NP_001116224.1:NP_005016.1:XP_006713720.1	Dementia, familial	p.HIS338ARG
Matrisome-associated	ECM Regulators	SERPINI1	serpin peptidase inhibitor, clade I (neuroserpin), member 1	8943	C9JDY5:C9JQU8:H7C5T9:Q99574	NP_001116224.1:NP_005016.1:XP_006713720.1	Encephalopathy, familial, with neuroserpin inclusion bodies, 604218 (3)	NA
Matrisome-associated	ECM Regulators	SERPINI1	serpin peptidase inhibitor, clade I (neuroserpin), member 1	8943	C9JDY5:C9JQU8:H7C5T9:Q99574	NP_001116224.1:NP_005016.1:XP_006713720.1	familial encephalopathy with neuroserpin inclusion bodies	NA
Matrisome-associated	ECM Regulators	ST14	suppression of tumorigenicity 14 (colon carcinoma)	11344	Q9Y5Y6	NP_068813.1	ARIH	p.GLY827ARG
Matrisome-associated	ECM Regulators	ST14	suppression of tumorigenicity 14 (colon carcinoma)	11344	Q9Y5Y6	NP_068813.1	Ichthyosis with hypotrichosis, autosomal recessive	p.MET1ILE
Matrisome-associated	ECM Regulators	ST14	suppression of tumorigenicity 14 (colon carcinoma)	11344	Q9Y5Y6	NP_068813.1	autosomal recessive congenital ichthyosis 11	NA
Matrisome-associated	ECM Regulators	TGM1	transglutaminase 1 (K polypeptide epidermal type I, protein-glutamine-gamma-glutamyltransferase)	11777	B4DWR7:H0YKI6:H0YLJ6:H0YLT9:H0YMQ8:H0YN27:H0YNM4:P22735	NP_000350.1	Congenital ichthyosis of skin	p.ARG142CYS
Matrisome-associated	ECM Regulators	TGM1	transglutaminase 1 (K polypeptide epidermal type I, protein-glutamine-gamma-glutamyltransferase)	11777	B4DWR7:H0YKI6:H0YLJ6:H0YLT9:H0YMQ8:H0YN27:H0YNM4:P22735	NP_000350.1	Congenital ichthyosis of skin	p.ARG142HIS
Matrisome-associated	ECM Regulators	TGM1	transglutaminase 1 (K polypeptide epidermal type I, protein-glutamine-gamma-glutamyltransferase)	11777	B4DWR7:H0YKI6:H0YLJ6:H0YLT9:H0YMQ8:H0YN27:H0YNM4:P22735	NP_000350.1	Congenital ichthyosis of skin	p.ARG143HIS
Matrisome-associated	ECM Regulators	TGM1	transglutaminase 1 (K polypeptide epidermal type I, protein-glutamine-gamma-glutamyltransferase)	11777	B4DWR7:H0YKI6:H0YLJ6:H0YLT9:H0YMQ8:H0YN27:H0YNM4:P22735	NP_000350.1	Congenital ichthyosis of skin	p.ARG286GLN
Matrisome-associated	ECM Regulators	TGM1	transglutaminase 1 (K polypeptide epidermal type I, protein-glutamine-gamma-glutamyltransferase)	11777	B4DWR7:H0YKI6:H0YLJ6:H0YLT9:H0YMQ8:H0YN27:H0YNM4:P22735	NP_000350.1	Congenital ichthyosis of skin	p.ARG307TRP
Matrisome-associated	ECM Regulators	TGM1	transglutaminase 1 (K polypeptide epidermal type I, protein-glutamine-gamma-glutamyltransferase)	11777	B4DWR7:H0YKI6:H0YLJ6:H0YLT9:H0YMQ8:H0YN27:H0YNM4:P22735	NP_000350.1	Congenital ichthyosis of skin	p.ARG323GLN
Matrisome-associated	ECM Regulators	TGM1	transglutaminase 1 (K polypeptide epidermal type I, protein-glutamine-gamma-glutamyltransferase)	11777	B4DWR7:H0YKI6:H0YLJ6:H0YLT9:H0YMQ8:H0YN27:H0YNM4:P22735	NP_000350.1	Congenital ichthyosis of skin	p.ARG389HIS
Matrisome-associated	ECM Regulators	TGM1	transglutaminase 1 (K polypeptide epidermal type I, protein-glutamine-gamma-glutamyltransferase)	11777	B4DWR7:H0YKI6:H0YLJ6:H0YLT9:H0YMQ8:H0YN27:H0YNM4:P22735	NP_000350.1	Congenital ichthyosis of skin	p.ARG396LEU
Matrisome-associated	ECM Regulators	TGM1	transglutaminase 1 (K polypeptide epidermal type I, protein-glutamine-gamma-glutamyltransferase)	11777	B4DWR7:H0YKI6:H0YLJ6:H0YLT9:H0YMQ8:H0YN27:H0YNM4:P22735	NP_000350.1	Congenital ichthyosis of skin	p.ASN289SER
Matrisome-associated	ECM Regulators	TGM1	transglutaminase 1 (K polypeptide epidermal type I, protein-glutamine-gamma-glutamyltransferase)	11777	B4DWR7:H0YKI6:H0YLJ6:H0YLT9:H0YMQ8:H0YN27:H0YNM4:P22735	NP_000350.1	Congenital ichthyosis of skin	p.ASP490GLY
Matrisome-associated	ECM Regulators	TGM1	transglutaminase 1 (K polypeptide epidermal type I, protein-glutamine-gamma-glutamyltransferase)	11777	B4DWR7:H0YKI6:H0YLJ6:H0YLT9:H0YMQ8:H0YN27:H0YNM4:P22735	NP_000350.1	Congenital ichthyosis of skin	p.GLY218SER
Matrisome-associated	ECM Regulators	TGM1	transglutaminase 1 (K polypeptide epidermal type I, protein-glutamine-gamma-glutamyltransferase)	11777	B4DWR7:H0YKI6:H0YLJ6:H0YLT9:H0YMQ8:H0YN27:H0YNM4:P22735	NP_000350.1	Congenital ichthyosis of skin	p.GLY278ARG
Matrisome-associated	ECM Regulators	TGM1	transglutaminase 1 (K polypeptide epidermal type I, protein-glutamine-gamma-glutamyltransferase)	11777	B4DWR7:H0YKI6:H0YLJ6:H0YLT9:H0YMQ8:H0YN27:H0YNM4:P22735	NP_000350.1	Congenital ichthyosis of skin	p.GLY392ASP
Matrisome-associated	ECM Regulators	TGM1	transglutaminase 1 (K polypeptide epidermal type I, protein-glutamine-gamma-glutamyltransferase)	11777	B4DWR7:H0YKI6:H0YLJ6:H0YLT9:H0YMQ8:H0YN27:H0YNM4:P22735	NP_000350.1	Congenital ichthyosis of skin	p.GLY94ASP
Matrisome-associated	ECM Regulators	TGM1	transglutaminase 1 (K polypeptide epidermal type I, protein-glutamine-gamma-glutamyltransferase)	11777	B4DWR7:H0YKI6:H0YLJ6:H0YLT9:H0YMQ8:H0YN27:H0YNM4:P22735	NP_000350.1	Congenital ichthyosis of skin	p.SER160CYS
Matrisome-associated	ECM Regulators	TGM1	transglutaminase 1 (K polypeptide epidermal type I, protein-glutamine-gamma-glutamyltransferase)	11777	B4DWR7:H0YKI6:H0YLJ6:H0YLT9:H0YMQ8:H0YN27:H0YNM4:P22735	NP_000350.1	Congenital ichthyosis of skin	p.SER42TYR
Matrisome-associated	ECM Regulators	TGM1	transglutaminase 1 (K polypeptide epidermal type I, protein-glutamine-gamma-glutamyltransferase)	11777	B4DWR7:H0YKI6:H0YLJ6:H0YLT9:H0YMQ8:H0YN27:H0YNM4:P22735	NP_000350.1	Congenital ichthyosis of skin	p.VAL379LEU
Matrisome-associated	ECM Regulators	TGM1	transglutaminase 1 (K polypeptide epidermal type I, protein-glutamine-gamma-glutamyltransferase)	11777	B4DWR7:H0YKI6:H0YLJ6:H0YLT9:H0YMQ8:H0YN27:H0YNM4:P22735	NP_000350.1	Congenital ichthyosis of skin	p.VAL383MET
Matrisome-associated	ECM Regulators	TGM1	transglutaminase 1 (K polypeptide epidermal type I, protein-glutamine-gamma-glutamyltransferase)	11777	B4DWR7:H0YKI6:H0YLJ6:H0YLT9:H0YMQ8:H0YN27:H0YNM4:P22735	NP_000350.1	Congenital ichthyosis of skin	p.VAL518MET
Matrisome-associated	ECM Regulators	TGM1	transglutaminase 1 (K polypeptide epidermal type I, protein-glutamine-gamma-glutamyltransferase)	11777	B4DWR7:H0YKI6:H0YLJ6:H0YLT9:H0YMQ8:H0YN27:H0YNM4:P22735	NP_000350.1	Ichthyosiform erythroderma, congenital, 242100 (3)	NA
Matrisome-associated	ECM Regulators	TGM1	transglutaminase 1 (K polypeptide epidermal type I, protein-glutamine-gamma-glutamyltransferase)	11777	B4DWR7:H0YKI6:H0YLJ6:H0YLT9:H0YMQ8:H0YN27:H0YNM4:P22735	NP_000350.1	Ichthyosis, lamellar, autosomal recessive, 242300 (3)	NA
Matrisome-associated	ECM Regulators	TGM1	transglutaminase 1 (K polypeptide epidermal type I, protein-glutamine-gamma-glutamyltransferase)	11777	B4DWR7:H0YKI6:H0YLJ6:H0YLT9:H0YMQ8:H0YN27:H0YNM4:P22735	NP_000350.1	Self-healing collodion baby, 242300 (3)	NA
Matrisome-associated	ECM Regulators	TGM1	transglutaminase 1 (K polypeptide epidermal type I, protein-glutamine-gamma-glutamyltransferase)	11777	B4DWR7:H0YKI6:H0YLJ6:H0YLT9:H0YMQ8:H0YN27:H0YNM4:P22735	NP_000350.1	acral self-healing collodion baby	NA
Matrisome-associated	ECM Regulators	TGM1	transglutaminase 1 (K polypeptide epidermal type I, protein-glutamine-gamma-glutamyltransferase)	11777	B4DWR7:H0YKI6:H0YLJ6:H0YLT9:H0YMQ8:H0YN27:H0YNM4:P22735	NP_000350.1	autosomal recessive congenital ichthyosis 1	NA
Matrisome-associated	ECM Regulators	TGM1	transglutaminase 1 (K polypeptide epidermal type I, protein-glutamine-gamma-glutamyltransferase)	11777	B4DWR7:H0YKI6:H0YLJ6:H0YLT9:H0YMQ8:H0YN27:H0YNM4:P22735	NP_000350.1	bathing suit ichthyosis	NA
Matrisome-associated	ECM Regulators	TGM1	transglutaminase 1 (K polypeptide epidermal type I, protein-glutamine-gamma-glutamyltransferase)	11777	B4DWR7:H0YKI6:H0YLJ6:H0YLT9:H0YMQ8:H0YN27:H0YNM4:P22735	NP_000350.1	congenital non-bullous ichthyosiform erythroderma	NA
Matrisome-associated	ECM Regulators	TGM1	transglutaminase 1 (K polypeptide epidermal type I, protein-glutamine-gamma-glutamyltransferase)	11777	B4DWR7:H0YKI6:H0YLJ6:H0YLT9:H0YMQ8:H0YN27:H0YNM4:P22735	NP_000350.1	lamellar ichthyosis	NA
Matrisome-associated	ECM Regulators	TGM1	transglutaminase 1 (K polypeptide epidermal type I, protein-glutamine-gamma-glutamyltransferase)	11777	B4DWR7:H0YKI6:H0YLJ6:H0YLT9:H0YMQ8:H0YN27:H0YNM4:P22735	NP_000350.1	self-healing collodion baby	NA
Matrisome-associated	ECM Regulators	TGM3	transglutaminase 3 (E polypeptide, protein-glutamine-gamma-glutamyltransferase)	11779	Q08188	NP_003236.3	uncombable hair syndrome	NA
Matrisome-associated	ECM Regulators	TGM5	transglutaminase 5	11781	O43548	NP_004236.1:NP_963925.2	Acral peeling skin syndrome	p.GLY113CYS
Matrisome-associated	ECM Regulators	TGM5	transglutaminase 5	11781	O43548	NP_004236.1:NP_963925.2	acral peeling skin syndrome	NA
Matrisome-associated	ECM Regulators	TGM6	transglutaminase 6	16255	O95932	NP_001241663.1:NP_945345.2	inherited acute myeloid leukemia	NA
Matrisome-associated	ECM Regulators	TGM6	transglutaminase 6	16255	O95932	NP_001241663.1:NP_945345.2	spinocerebellar ataxia type 35	NA
Matrisome-associated	ECM Regulators	TIMP3	TIMP metallopeptidase inhibitor 3	11822	P35625	NP_000353.1	Fundus dystrophy, Sorsby	p.GLU162TER
Matrisome-associated	ECM Regulators	TIMP3	TIMP metallopeptidase inhibitor 3	11822	P35625	NP_000353.1	Fundus dystrophy, Sorsby	p.GLY189CYS
Matrisome-associated	ECM Regulators	TIMP3	TIMP metallopeptidase inhibitor 3	11822	P35625	NP_000353.1	Sorsby fundus dystrophy, 136900 (3)	NA
Matrisome-associated	ECM Regulators	TIMP3	TIMP metallopeptidase inhibitor 3	11822	P35625	NP_000353.1	Sorsby's fundus dystrophy	NA
Matrisome-associated	ECM Regulators	TLL1	tolloid-like 1	11843	D6RAK5:D6RBI6:D6RCE0:E9PD25:O43897	NP_001191689.1:NP_036596.3	Atrial septal defect	p.ILE629VAL
Matrisome-associated	ECM Regulators	TLL1	tolloid-like 1	11843	D6RAK5:D6RBI6:D6RCE0:E9PD25:O43897	NP_001191689.1:NP_036596.3	Atrial septal defect	p.MET182LEU
Matrisome-associated	ECM Regulators	TLL1	tolloid-like 1	11843	D6RAK5:D6RBI6:D6RCE0:E9PD25:O43897	NP_001191689.1:NP_036596.3	Atrial septal defect	p.VAL238ALA
Matrisome-associated	ECM Regulators	TLL1	tolloid-like 1	11843	D6RAK5:D6RBI6:D6RCE0:E9PD25:O43897	NP_001191689.1:NP_036596.3	atrial heart septal defect 6	NA
Matrisome-associated	ECM Regulators	TLL1	tolloid-like 1	11843	D6RAK5:D6RBI6:D6RCE0:E9PD25:O43897	NP_001191689.1:NP_036596.3	atrial septal defect, ostium primum type	NA
Matrisome-associated	ECM Regulators	TLL1	tolloid-like 1	11843	D6RAK5:D6RBI6:D6RCE0:E9PD25:O43897	NP_001191689.1:NP_036596.3	atrial septal defect, ostium secundum type	NA
Matrisome-associated	ECM Regulators	TMPRSS15	protease, serine, 7 (enterokinase)	9490	E9PG70:P98073	NP_002763.2	ENTEROKINASE DEFICIENCY	p.ARG857TER
Matrisome-associated	ECM Regulators	TMPRSS15	protease, serine, 7 (enterokinase)	9490	E9PG70:P98073	NP_002763.2	ENTEROKINASE DEFICIENCY	p.GLN261TER
Matrisome-associated	ECM Regulators	TMPRSS15	protease, serine, 7 (enterokinase)	9490	E9PG70:P98073	NP_002763.2	ENTEROKINASE DEFICIENCY	p.SER712TER
Matrisome-associated	ECM Regulators	TMPRSS15	protease, serine, 7 (enterokinase)	9490	E9PG70:P98073	NP_002763.2	congenital enteropathy due to enteropeptidase deficiency	NA
Matrisome-associated	ECM-affiliated Proteins	ANXA11	annexin A11	535	H0Y6E1:P50995:Q5T0G7:Q5T0G9	NP_001148.1:NP_001265336.1:NP_001265337.1:NP_001265338.1:NP_665875.1:NP_665876.1	amyotrophic lateral sclerosis	NA
Matrisome-associated	ECM-affiliated Proteins	ANXA11	annexin A11	535	H0Y6E1:P50995:Q5T0G7:Q5T0G9	NP_001148.1:NP_001265336.1:NP_001265337.1:NP_001265338.1:NP_665875.1:NP_665876.1	amyotrophic lateral sclerosis type 23	NA
Matrisome-associated	ECM-affiliated Proteins	C1QA	complement component 1, q subcomponent, A chain	1241	P02745:X6RLJ0	NP_057075.1	C1q deficiency	p.GLN208TER
Matrisome-associated	ECM-affiliated Proteins	C1QA	complement component 1, q subcomponent, A chain	1241	P02745:X6RLJ0	NP_057075.1	C1q deficiency, type A (3)	NA
Matrisome-associated	ECM-affiliated Proteins	C1QA	complement component 1, q subcomponent, A chain	1241	P02745:X6RLJ0	NP_057075.1	C1Q deficiency	NA
Matrisome-associated	ECM-affiliated Proteins	C1QA	complement component 1, q subcomponent, A chain	1241	P02745:X6RLJ0	NP_057075.1	immunodeficiency due to a classical component pathway complement deficiency	NA
Matrisome-associated	ECM-affiliated Proteins	C1QA	complement component 1, q subcomponent, A chain	1241	P02745:X6RLJ0	NP_057075.1	pediatric systemic lupus erythematosus	NA
Matrisome-associated	ECM-affiliated Proteins	C1QB	complement component 1, q subcomponent, B chain	1242	D6R934:D6RGJ1:P02746	NP_000482.3:XP_005246039.1	C1q deficiency, type B (3)	NA
Matrisome-associated	ECM-affiliated Proteins	C1QB	complement component 1, q subcomponent, B chain	1242	D6R934:D6RGJ1:P02746	NP_000482.3:XP_005246039.1	C1Q deficiency	NA
Matrisome-associated	ECM-affiliated Proteins	C1QB	complement component 1, q subcomponent, B chain	1242	D6R934:D6RGJ1:P02746	NP_000482.3:XP_005246039.1	immunodeficiency due to a classical component pathway complement deficiency	NA
Matrisome-associated	ECM-affiliated Proteins	C1QC	complement component 1, q subcomponent, C chain	1245	P02747	NP_001107573.1:NP_758957.2	C1Q deficiency	NA
Matrisome-associated	ECM-affiliated Proteins	C1QC	complement component 1, q subcomponent, C chain	1245	P02747	NP_001107573.1:NP_758957.2	immunodeficiency due to a classical component pathway complement deficiency	NA
Matrisome-associated	ECM-affiliated Proteins	C1QTNF5	C1q and tumor necrosis factor related protein 5	14344	Q9BXJ0	NP_001265360.1:NP_056460.1	Retinal degeneration, late-onset, autosomal dominant, 605670 (3)	NA
Matrisome-associated	ECM-affiliated Proteins	C1QTNF5	C1q and tumor necrosis factor related protein 5	14344	Q9BXJ0	NP_001265360.1:NP_056460.1	late-onset retinal degeneration	NA
Matrisome-associated	ECM-affiliated Proteins	CD209	CD209 molecule	1641	M0QZG5:M0R0P0:Q9NNX6:X6RB12	NP_001138365.1:NP_001138365.1:NP_001138366.1:NP_001138367.1:NP_001138368.1:NP_001138369.1:NP_066978.1:NP_001138371.1	Dengue fever, protection against (3)	NA
Matrisome-associated	ECM-affiliated Proteins	CLEC7A	C-type lectin domain family 7, member A	14558	Q68D78:Q9BXN2	NP_072092.2:NP_922938.1:NP_922939.1:NP_922940.1:NP_922941.1:NP_072092.2:NP_922938.1:NP_922939.1:NP_922940.1:NP_922941.1:NP_922945.1:XP_005253524.1:XP_005253525.1:XP_006719198.1:XP_006719199.1	ASPERGILLOSIS	p.TYR238TER
Matrisome-associated	ECM-affiliated Proteins	CLEC7A	C-type lectin domain family 7, member A	14558	Q68D78:Q9BXN2	NP_072092.2:NP_922938.1:NP_922939.1:NP_922940.1:NP_922941.1:NP_072092.2:NP_922938.1:NP_922939.1:NP_922940.1:NP_922941.1:NP_922945.1:XP_005253524.1:XP_005253525.1:XP_006719198.1:XP_006719199.1	candidiasis, familial, 4	NA
Matrisome-associated	ECM-affiliated Proteins	CLEC7A	C-type lectin domain family 7, member A	14558	Q68D78:Q9BXN2	NP_072092.2:NP_922938.1:NP_922939.1:NP_922940.1:NP_922941.1:NP_072092.2:NP_922938.1:NP_922939.1:NP_922940.1:NP_922941.1:NP_922945.1:XP_005253524.1:XP_005253525.1:XP_006719198.1:XP_006719199.1	chronic mucocutaneous candidiasis (disease)	NA
Matrisome-associated	ECM-affiliated Proteins	COLEC10	collectin sub-family member 10 (C-type lectin)	2220	Q9Y6Z7	NP_006429.2	MC syndrome	NA
Matrisome-associated	ECM-affiliated Proteins	COLEC10	collectin sub-family member 10 (C-type lectin)	2220	Q9Y6Z7	NP_006429.2	MC syndrome 3	NA
Matrisome-associated	ECM-affiliated Proteins	COLEC11	collectin sub-family member 11	17213	C9JWT5:F8WB29:Q9BWP8	NP_001242911.1:NP_001242912.1:NP_001242913.1:NP_001242914.1:NP_001242915.1:NP_001242916.1:NP_001242917.1:NP_001242918.1:NP_076932.1:NP_954705.1	MC syndrome	NA
Matrisome-associated	ECM-affiliated Proteins	COLEC11	collectin sub-family member 11	17213	C9JWT5:F8WB29:Q9BWP8	NP_001242911.1:NP_001242912.1:NP_001242913.1:NP_001242914.1:NP_001242915.1:NP_001242916.1:NP_001242917.1:NP_001242918.1:NP_076932.1:NP_954705.1	MC syndrome 2	NA
Matrisome-associated	ECM-affiliated Proteins	FCN3	ficolin (collagen/fibrinogen domain containing) 3 (Hakata antigen)	3625	O75636:Q5SSB9	NP_003656.2:NP_775628.1	immunodeficiency due to ficolin3 deficiency	NA
Matrisome-associated	ECM-affiliated Proteins	FREM1	FRAS1 related extracellular matrix 1	23399	C9JT55:F8WE85:Q5H8C1	NP_001171175.1:NP_659403.4:XP_005251439.1:XP_005251441.1:XP_006716786.1:XP_006716792.1	BNAR syndrome	NA
Matrisome-associated	ECM-affiliated Proteins	FREM1	FRAS1 related extracellular matrix 1	23399	C9JT55:F8WE85:Q5H8C1	NP_001171175.1:NP_659403.4:XP_005251439.1:XP_005251441.1:XP_006716786.1:XP_006716792.1	isolated trigonocephaly	NA
Matrisome-associated	ECM-affiliated Proteins	FREM1	FRAS1 related extracellular matrix 1	23399	C9JT55:F8WE85:Q5H8C1	NP_001171175.1:NP_659403.4:XP_005251439.1:XP_005251441.1:XP_006716786.1:XP_006716792.1	oculotrichoanal syndrome	NA
Matrisome-associated	ECM-affiliated Proteins	FREM1	FRAS1 related extracellular matrix 1	23399	C9JT55:F8WE85:Q5H8C1	NP_001171175.1:NP_659403.4:XP_005251439.1:XP_005251441.1:XP_006716786.1:XP_006716792.1	renal agenesis, unilateral	NA
Matrisome-associated	ECM-affiliated Proteins	FREM1	FRAS1 related extracellular matrix 1	23399	C9JT55:F8WE85:Q5H8C1	NP_001171175.1:NP_659403.4:XP_005251439.1:XP_005251441.1:XP_006716786.1:XP_006716792.1	trigonocephaly 2	NA
Matrisome-associated	ECM-affiliated Proteins	FREM2	FRAS1 related extracellular matrix protein 2	25396	Q5SZK8	NP_997244.4	Cryptophthalmos syndrome	p.GLU1972LYS
Matrisome-associated	ECM-affiliated Proteins	FREM2	FRAS1 related extracellular matrix protein 2	25396	Q5SZK8	NP_997244.4	Cryptophthalmos syndrome	p.GLU1974LYS
Matrisome-associated	ECM-affiliated Proteins	FREM2	FRAS1 related extracellular matrix protein 2	25396	Q5SZK8	NP_997244.4	Fraser syndrome, 219000 (3)	NA
Matrisome-associated	ECM-affiliated Proteins	FREM2	FRAS1 related extracellular matrix protein 2	25396	Q5SZK8	NP_997244.4	complete cryptophthalmia	NA
Matrisome-associated	ECM-affiliated Proteins	FREM2	FRAS1 related extracellular matrix protein 2	25396	Q5SZK8	NP_997244.4	Fraser syndrome	NA
Matrisome-associated	ECM-affiliated Proteins	FREM2	FRAS1 related extracellular matrix protein 2	25396	Q5SZK8	NP_997244.4	Fraser syndrome 2	NA
Matrisome-associated	ECM-affiliated Proteins	FREM2	FRAS1 related extracellular matrix protein 2	25396	Q5SZK8	NP_997244.4	isolated cryptophthalmia	NA
Matrisome-associated	ECM-affiliated Proteins	FREM2	FRAS1 related extracellular matrix protein 2	25396	Q5SZK8	NP_997244.4	renal agenesis, unilateral	NA
Matrisome-associated	ECM-affiliated Proteins	GPC3	glypican 3	4451	H0Y3U6:P51654	NP_001158089.1:NP_001158091.1:NP_004475.1	Simpson-Golabi-Behmel syndrome, type 1, 312870 (3)	NA
Matrisome-associated	ECM-affiliated Proteins	GPC3	glypican 3	4451	H0Y3U6:P51654	NP_001158089.1:NP_001158091.1:NP_004475.1	Wilms tumor, somatic, 194070 (3)	NA
Matrisome-associated	ECM-affiliated Proteins	GPC3	glypican 3	4451	H0Y3U6:P51654	NP_001158089.1:NP_001158091.1:NP_004475.1	Simpson-Golabi-Behmel syndrome	NA
Matrisome-associated	ECM-affiliated Proteins	GPC3	glypican 3	4451	H0Y3U6:P51654	NP_001158089.1:NP_001158091.1:NP_004475.1	Simpson-Golabi-Behmel syndrome type 1	NA
Matrisome-associated	ECM-affiliated Proteins	GPC3	glypican 3	4451	H0Y3U6:P51654	NP_001158089.1:NP_001158091.1:NP_004475.1	Wilms tumor type 1	NA
Matrisome-associated	ECM-affiliated Proteins	GPC4	glypican 4	4452	B4E2C0:O75487	NP_001439.2	Keipert syndrome	NA
Matrisome-associated	ECM-affiliated Proteins	GPC6	glypican 6	4454	Q9Y625	NP_005699.1	OMODYSPLASIA 1	p.ARG234TER
Matrisome-associated	ECM-affiliated Proteins	GPC6	glypican 6	4454	Q9Y625	NP_005699.1	autosomal recessive omodysplasia	NA
Matrisome-associated	ECM-affiliated Proteins	GREM1	gremlin 1, cysteine knot superfamily, homolog (Xenopus laevis)	2001	H0YLY2:O60565	NP_001178252.1:NP_037504.1	hereditary mixed polyposis syndrome	NA
Matrisome-associated	ECM-affiliated Proteins	LGALS2	lectin, galactoside-binding, soluble, 2	6562	B0QYC9:P05162	NP_006489.1	Myocardial infarction, susceptibility to (3)	NA
Matrisome-associated	ECM-affiliated Proteins	LMAN1	lectin, mannose-binding, 1	6631	P49257	NP_005561.1	Combined deficiency of factor V and factor VIII, 1	p.MET1THR
Matrisome-associated	ECM-affiliated Proteins	LMAN1	lectin, mannose-binding, 1	6631	P49257	NP_005561.1	Combined factor V and VIII deficiency, 227300 (3)	NA
Matrisome-associated	ECM-affiliated Proteins	LMAN1	lectin, mannose-binding, 1	6631	P49257	NP_005561.1	combined deficiency of factor V and factor VIII	NA
Matrisome-associated	ECM-affiliated Proteins	LMAN1	lectin, mannose-binding, 1	6631	P49257	NP_005561.1	factor V and factor VIII, combined deficiency of, type 1	NA
Matrisome-associated	ECM-affiliated Proteins	MBL2	mannose-binding lectin (protein C) 2, soluble (opsonic defect)	6922	P11226	NP_000233.1:XP_006717924.1	Meningococcal disease, susceptibility to (3)	NA
Matrisome-associated	ECM-affiliated Proteins	MBL2	mannose-binding lectin (protein C) 2, soluble (opsonic defect)	6922	P11226	NP_000233.1:XP_006717924.1	Chronic infections, due to opsonin defect (3)	NA
Matrisome-associated	ECM-affiliated Proteins	MUC1	mucin 1, cell surface associated	7508	B1AVQ5:B1AVQ7:P15941	NP_001018016.1:NP_001018017.1:NP_001037855.1:NP_001037856.1:NP_001037857.1:NP_001037858.1:NP_001191214.1:NP_001191215.1:NP_001191216.1:NP_001191217.1:NP_001191218.1:NP_001191219.1:NP_001191220.1:NP_001191221.1:NP_001191222.1:NP_001191223.1:NP_001191224.1:NP_001191225.1:NP_001191226.1:NP_002447.4:NP_001191214.1	autosomal dominant medullary cystic kidney disease without hyperuricemia	NA
Matrisome-associated	ECM-affiliated Proteins	MUC1	mucin 1, cell surface associated	7508	B1AVQ5:B1AVQ7:P15941	NP_001018016.1:NP_001018017.1:NP_001037855.1:NP_001037856.1:NP_001037857.1:NP_001037858.1:NP_001191214.1:NP_001191215.1:NP_001191216.1:NP_001191217.1:NP_001191218.1:NP_001191219.1:NP_001191220.1:NP_001191221.1:NP_001191222.1:NP_001191223.1:NP_001191224.1:NP_001191225.1:NP_001191226.1:NP_002447.4:NP_001191214.1	medullary cystic kidney disease 1	NA
Matrisome-associated	ECM-affiliated Proteins	PLXND1	plexin D1	9107	D6RH25:H0Y9D1:H0YA64:H0YAB2:H0YAM9:Q9Y4D7	NP_055918.2	Mobius syndrome	NA
Matrisome-associated	ECM-affiliated Proteins	PLXND1	plexin D1	9107	D6RH25:H0Y9D1:H0YA64:H0YAB2:H0YAM9:Q9Y4D7	NP_055918.2	persistent truncus arteriosus	NA
Matrisome-associated	ECM-affiliated Proteins	SDC3	syndecan 3	10660	D3DPN2:O75056	NP_055469.3	Obesity, association with	p.VAL208LEU
Matrisome-associated	ECM-affiliated Proteins	SEMA3A	sema domain, immunoglobulin domain (Ig), short basic domain, secreted, (semaphorin) 3A	10723	C9J9C4:C9JD25:Q14563	NP_006071.1:XP_005250167.1:XP_005250168.1:XP_006715901.1:XP_006715902.1	Kallmann syndrome	NA
Matrisome-associated	ECM-affiliated Proteins	SEMA3E	sema domain, immunoglobulin domain (Ig), short basic domain, secreted, (semaphorin) 3E	10727	C9JVH5:F8WCZ5:O15041	NP_001171600.1:NP_036563.1	CHARGE association	p.SER703LEU
Matrisome-associated	ECM-affiliated Proteins	SEMA4A	sema domain, immunoglobulin domain (Ig), transmembrane domain (TM) and short cytoplasmic domain, (semaphorin) 4A	10729	Q5TCI4:Q5TCI6:Q5TCJ5:Q5TCJ7:Q9H3S1	NP_001180229.1:NP_001180230.1:NP_001180231.1:NP_071762.2	Retinitis pigmentosa	p.ARG713GLN
Matrisome-associated	ECM-affiliated Proteins	SEMA4A	sema domain, immunoglobulin domain (Ig), transmembrane domain (TM) and short cytoplasmic domain, (semaphorin) 4A	10729	Q5TCI4:Q5TCI6:Q5TCJ5:Q5TCJ7:Q9H3S1	NP_001180229.1:NP_001180230.1:NP_001180231.1:NP_071762.2	CONE-ROD DYSTROPHY 10	p.ASP345HIS
Matrisome-associated	ECM-affiliated Proteins	SEMA4A	sema domain, immunoglobulin domain (Ig), transmembrane domain (TM) and short cytoplasmic domain, (semaphorin) 4A	10729	Q5TCI4:Q5TCI6:Q5TCJ5:Q5TCJ7:Q9H3S1	NP_001180229.1:NP_001180230.1:NP_001180231.1:NP_071762.2	CONE-ROD DYSTROPHY 10	p.PHE350CYS
Matrisome-associated	ECM-affiliated Proteins	SEMA4A	sema domain, immunoglobulin domain (Ig), transmembrane domain (TM) and short cytoplasmic domain, (semaphorin) 4A	10729	Q5TCI4:Q5TCI6:Q5TCJ5:Q5TCJ7:Q9H3S1	NP_001180229.1:NP_001180230.1:NP_001180231.1:NP_071762.2	cone-rod dystrophy	NA
Matrisome-associated	ECM-affiliated Proteins	SEMA4A	sema domain, immunoglobulin domain (Ig), transmembrane domain (TM) and short cytoplasmic domain, (semaphorin) 4A	10729	Q5TCI4:Q5TCI6:Q5TCJ5:Q5TCJ7:Q9H3S1	NP_001180229.1:NP_001180230.1:NP_001180231.1:NP_071762.2	cone-rod dystrophy 10	NA
Matrisome-associated	ECM-affiliated Proteins	SEMA4A	sema domain, immunoglobulin domain (Ig), transmembrane domain (TM) and short cytoplasmic domain, (semaphorin) 4A	10729	Q5TCI4:Q5TCI6:Q5TCJ5:Q5TCJ7:Q9H3S1	NP_001180229.1:NP_001180230.1:NP_001180231.1:NP_071762.2	familial colorectal cancer type X	NA
Matrisome-associated	ECM-affiliated Proteins	SEMA4A	sema domain, immunoglobulin domain (Ig), transmembrane domain (TM) and short cytoplasmic domain, (semaphorin) 4A	10729	Q5TCI4:Q5TCI6:Q5TCJ5:Q5TCJ7:Q9H3S1	NP_001180229.1:NP_001180230.1:NP_001180231.1:NP_071762.2	retinitis pigmentosa	NA
Matrisome-associated	ECM-affiliated Proteins	SEMA4A	sema domain, immunoglobulin domain (Ig), transmembrane domain (TM) and short cytoplasmic domain, (semaphorin) 4A	10729	Q5TCI4:Q5TCI6:Q5TCJ5:Q5TCJ7:Q9H3S1	NP_001180229.1:NP_001180230.1:NP_001180231.1:NP_071762.2	retinitis pigmentosa 35	NA
Matrisome-associated	ECM-affiliated Proteins	SFTPA1	surfactant protein A1	10798	B4DNW5:J3KPA7:Q8IWL2	NP_001087239.2:NP_001158116.1:NP_001158119.1:NP_005402.3:XP_005270119.1:XP_006718016.1	Idiopathic pulmonary fibrosis	p.ARG219TRP
Matrisome-associated	ECM-affiliated Proteins	SFTPA1	surfactant protein A1	10798	B4DNW5:J3KPA7:Q8IWL2	NP_001087239.2:NP_001158116.1:NP_001158119.1:NP_005402.3:XP_005270119.1:XP_006718016.1	Pulmonary fibrosis, idiopathic, susceptibility to, 178500 (3)	NA
Matrisome-associated	ECM-affiliated Proteins	SFTPA2	surfactant protein A2	10799	Q8IWL1:R4GMN3:X6REF7	NP_001092138.1:XP_005270188.1:XP_005270189.1	Idiopathic fibrosing alveolitis, chronic form	p.GLY231VAL
Matrisome-associated	ECM-affiliated Proteins	SFTPA2	surfactant protein A2	10799	Q8IWL1:R4GMN3:X6REF7	NP_001092138.1:XP_005270188.1:XP_005270189.1	Idiopathic fibrosing alveolitis, chronic form	p.PHE198SER
Matrisome-associated	ECM-affiliated Proteins	SFTPA2	surfactant protein A2	10799	Q8IWL1:R4GMN3:X6REF7	NP_001092138.1:XP_005270188.1:XP_005270189.1	idiopathic pulmonary fibrosis	NA
Matrisome-associated	ECM-affiliated Proteins	SFTPB	surfactant protein B	10801	D6W5L6:H0Y7V6:P07988:U3KQT2	NP_000533.3:NP_942140.2:NP_000533.3:NP_942140.2:XP_005264544.1	Surfactant metabolism dysfunction, pulmonary, 1	p.ARG248CYS
Matrisome-associated	ECM-affiliated Proteins	SFTPB	surfactant protein B	10801	D6W5L6:H0Y7V6:P07988:U3KQT2	NP_000533.3:NP_942140.2:NP_000533.3:NP_942140.2:XP_005264544.1	Pulmonary alveolar proteinosis, congenital, 265120 (3)	NA
Matrisome-associated	ECM-affiliated Proteins	SFTPB	surfactant protein B	10801	D6W5L6:H0Y7V6:P07988:U3KQT2	NP_000533.3:NP_942140.2:NP_000533.3:NP_942140.2:XP_005264544.1	neonatal acute respiratory distress due to SP-B deficiency	NA
Matrisome-associated	ECM-affiliated Proteins	SFTPC	surfactant protein C	10802	C9JYF6:E5RG20:E5RG93:E5RHW5:E5RI64:E5RI92:P11686	NP_001165828.1:NP_001165881.1:NP_003009.2	SMDP2	p.ALA116ASP
Matrisome-associated	ECM-affiliated Proteins	SFTPC	surfactant protein C	10802	C9JYF6:E5RG20:E5RG93:E5RHW5:E5RI64:E5RI92:P11686	NP_001165828.1:NP_001165881.1:NP_003009.2	Interstitial lung disease	p.ARG167GLN
Matrisome-associated	ECM-affiliated Proteins	SFTPC	surfactant protein C	10802	C9JYF6:E5RG20:E5RG93:E5RHW5:E5RI64:E5RI92:P11686	NP_001165828.1:NP_001165881.1:NP_003009.2	Interstitial lung disease	p.GLU66LYS
Matrisome-associated	ECM-affiliated Proteins	SFTPC	surfactant protein C	10802	C9JYF6:E5RG20:E5RG93:E5RHW5:E5RI64:E5RI92:P11686	NP_001165828.1:NP_001165881.1:NP_003009.2	Interstitial lung disease	p.ILE73THR
Matrisome-associated	ECM-affiliated Proteins	SFTPC	surfactant protein C	10802	C9JYF6:E5RG20:E5RG93:E5RHW5:E5RI64:E5RI92:P11686	NP_001165828.1:NP_001165881.1:NP_003009.2	Interstitial lung disease	p.LEU188GLN
Matrisome-associated	ECM-affiliated Proteins	SFTPC	surfactant protein C	10802	C9JYF6:E5RG20:E5RG93:E5RHW5:E5RI64:E5RI92:P11686	NP_001165828.1:NP_001165881.1:NP_003009.2	Interstitial lung disease	p.LEU188PRO
Matrisome-associated	ECM-affiliated Proteins	SFTPC	surfactant protein C	10802	C9JYF6:E5RG20:E5RG93:E5RHW5:E5RI64:E5RI92:P11686	NP_001165828.1:NP_001165881.1:NP_003009.2	Pneumonitis, desquamative interstitial, 263000 (3)	NA
Matrisome-associated	ECM-affiliated Proteins	SFTPC	surfactant protein C	10802	C9JYF6:E5RG20:E5RG93:E5RHW5:E5RI64:E5RI92:P11686	NP_001165828.1:NP_001165881.1:NP_003009.2	Pulmonary alveolar proteinosis, 265120 (3)	NA
Matrisome-associated	ECM-affiliated Proteins	SFTPC	surfactant protein C	10802	C9JYF6:E5RG20:E5RG93:E5RHW5:E5RI64:E5RI92:P11686	NP_001165828.1:NP_001165881.1:NP_003009.2	Pulmonary fibrosis, idiopathic, familial, 178500 (3)	NA
Matrisome-associated	ECM-affiliated Proteins	SFTPC	surfactant protein C	10802	C9JYF6:E5RG20:E5RG93:E5RHW5:E5RI64:E5RI92:P11686	NP_001165828.1:NP_001165881.1:NP_003009.2	Surfactant protein C deficiency (3)	NA
Matrisome-associated	ECM-affiliated Proteins	SFTPC	surfactant protein C	10802	C9JYF6:E5RG20:E5RG93:E5RHW5:E5RI64:E5RI92:P11686	NP_001165828.1:NP_001165881.1:NP_003009.2	chronic respiratory distress with surfactant metabolism deficiency	NA
Matrisome-associated	ECM-affiliated Proteins	SFTPC	surfactant protein C	10802	C9JYF6:E5RG20:E5RG93:E5RHW5:E5RI64:E5RI92:P11686	NP_001165828.1:NP_001165881.1:NP_003009.2	interstitial lung disease due to SP-c deficiency	NA
Matrisome-associated	ECM-affiliated Proteins	SFTPC	surfactant protein C	10802	C9JYF6:E5RG20:E5RG93:E5RHW5:E5RI64:E5RI92:P11686	NP_001165828.1:NP_001165881.1:NP_003009.2	surfactant metabolism dysfunction, pulmonary, 2	NA
Matrisome-associated	Secreted Factors	AMH	anti-Mullerian hormone	464	K7EJU5:P03971	NP_000470.2	PERSISTENT MULLERIAN DUCT SYNDROME, TYPE I	p.GLU382TER
Matrisome-associated	Secreted Factors	AMH	anti-Mullerian hormone	464	K7EJU5:P03971	NP_000470.2	Persistent Mullerian duct syndrome, type I, 261550 (3)	NA
Matrisome-associated	Secreted Factors	AMH	anti-Mullerian hormone	464	K7EJU5:P03971	NP_000470.2	persistent Mullerian duct syndrome	NA
Matrisome-associated	Secreted Factors	ANGPTL3	angiopoietin-like 3	491	Q9Y5C1	NP_055310.1	Hypobetalipoproteinemia, familial, 2	p.GLU129TER
Matrisome-associated	Secreted Factors	ANGPTL3	angiopoietin-like 3	491	Q9Y5C1	NP_055310.1	familial hypobetalipoproteinemia 2	NA
Matrisome-associated	Secreted Factors	ANGPTL4	angiopoietin-like 4	16039	M0QZ51:M0R0N8:M0R2X8:M0R369:M0R3A2:Q9BY76	NP_001034756.1:NP_647475.1	Lower plasma triglyceride level	p.GLU40LYS
Matrisome-associated	Secreted Factors	ANGPTL6	angiopoietin-like 6	23140	K7EKF6:Q8NI99	NP_114123.2	intracranial berry aneurysm	NA
Matrisome-associated	Secreted Factors	BDNF	brain-derived neurotrophic factor	1033	E9PMP3:P23560	NP_001137277.1:NP_001137278.1:NP_001137279.1:NP_001137280.1:NP_001137281.1:NP_001137282.1:NP_001137283.1:NP_001137284.1:NP_001137285.1:NP_001137286.1:NP_001137288.1:NP_001700.2:NP_733927.1:NP_733928.1:NP_733929.1:NP_733930.1:NP_733931.1	ANOREXIA NERVOSA, SUSCEPTIBILITY TO, 2	p.VAL66MET
Matrisome-associated	Secreted Factors	BDNF	brain-derived neurotrophic factor	1033	E9PMP3:P23560	NP_001137277.1:NP_001137278.1:NP_001137279.1:NP_001137280.1:NP_001137281.1:NP_001137282.1:NP_001137283.1:NP_001137284.1:NP_001137285.1:NP_001137286.1:NP_001137288.1:NP_001700.2:NP_733927.1:NP_733928.1:NP_733929.1:NP_733930.1:NP_733931.1	Central hypoventilation syndrome, congenital, 209880 (3)	NA
Matrisome-associated	Secreted Factors	BDNF	brain-derived neurotrophic factor	1033	E9PMP3:P23560	NP_001137277.1:NP_001137278.1:NP_001137279.1:NP_001137280.1:NP_001137281.1:NP_001137282.1:NP_001137283.1:NP_001137284.1:NP_001137285.1:NP_001137286.1:NP_001137288.1:NP_001700.2:NP_733927.1:NP_733928.1:NP_733929.1:NP_733930.1:NP_733931.1	Memory impairment, susceptibility to (3)	NA
Matrisome-associated	Secreted Factors	BDNF	brain-derived neurotrophic factor	1033	E9PMP3:P23560	NP_001137277.1:NP_001137278.1:NP_001137279.1:NP_001137280.1:NP_001137281.1:NP_001137282.1:NP_001137283.1:NP_001137284.1:NP_001137285.1:NP_001137286.1:NP_001137288.1:NP_001700.2:NP_733927.1:NP_733928.1:NP_733929.1:NP_733930.1:NP_733931.1	Obsessive-compulsive disorder, protection against, 164230 (3)	NA
Matrisome-associated	Secreted Factors	BMP15	bone morphogenetic protein 15	1068	O95972	NP_005439.2	Premature ovarian failure & amenorrhoea	p.ALA180THR
Matrisome-associated	Secreted Factors	BMP15	bone morphogenetic protein 15	1068	O95972	NP_005439.2	Premature ovarian failure	p.ARG68TRP
Matrisome-associated	Secreted Factors	BMP15	bone morphogenetic protein 15	1068	O95972	NP_005439.2	Premature ovarian failure & amenorrhoea	p.ARG76CYS
Matrisome-associated	Secreted Factors	BMP15	bone morphogenetic protein 15	1068	O95972	NP_005439.2	Premature ovarian failure	p.GLN211TER
Matrisome-associated	Secreted Factors	BMP15	bone morphogenetic protein 15	1068	O95972	NP_005439.2	Ovarian dysgenesis 2	p.TYR235CYS
Matrisome-associated	Secreted Factors	BMP15	bone morphogenetic protein 15	1068	O95972	NP_005439.2	Ovarian dysgenesis 2, 300510 (3)	NA
Matrisome-associated	Secreted Factors	BMP15	bone morphogenetic protein 15	1068	O95972	NP_005439.2	ovarian dysgenesis 2	NA
Matrisome-associated	Secreted Factors	BMP15	bone morphogenetic protein 15	1068	O95972	NP_005439.2	XX gonadal dysgenesis	NA
Matrisome-associated	Secreted Factors	BMP2	bone morphogenetic protein 2	1069	P12643	NP_001191.1	brachydactyly type A2	NA
Matrisome-associated	Secreted Factors	BMP2	bone morphogenetic protein 2	1069	P12643	NP_001191.1	short stature, facial dysmorphism, and skeletal anomalies with or without cardiac anomalies	NA
Matrisome-associated	Secreted Factors	BMP4	bone morphogenetic protein 4	1071	H0YLW3:H0YM53:H0YMP9:P12644:V9GYF1	NP_001193.2:NP_570911.2:NP_570912.2:XP_005268072.1	OFC11	p.ALA346VAL
Matrisome-associated	Secreted Factors	BMP4	bone morphogenetic protein 4	1071	H0YLW3:H0YM53:H0YMP9:P12644:V9GYF1	NP_001193.2:NP_570911.2:NP_570912.2:XP_005268072.1	OFC11	p.ARG287HIS
Matrisome-associated	Secreted Factors	BMP4	bone morphogenetic protein 4	1071	H0YLW3:H0YM53:H0YMP9:P12644:V9GYF1	NP_001193.2:NP_570911.2:NP_570912.2:XP_005268072.1	Microphthalmia syndromic 6	p.GLU93GLY
Matrisome-associated	Secreted Factors	BMP4	bone morphogenetic protein 4	1071	H0YLW3:H0YM53:H0YMP9:P12644:V9GYF1	NP_001193.2:NP_570911.2:NP_570912.2:XP_005268072.1	OFC11	p.SER91CYS
Matrisome-associated	Secreted Factors	BMP4	bone morphogenetic protein 4	1071	H0YLW3:H0YM53:H0YMP9:P12644:V9GYF1	NP_001193.2:NP_570911.2:NP_570912.2:XP_005268072.1	microphthalmia with brain and digit anomalies	NA
Matrisome-associated	Secreted Factors	BMP4	bone morphogenetic protein 4	1071	H0YLW3:H0YM53:H0YMP9:P12644:V9GYF1	NP_001193.2:NP_570911.2:NP_570912.2:XP_005268072.1	orofacial cleft 11	NA
Matrisome-associated	Secreted Factors	BMP4	bone morphogenetic protein 4	1071	H0YLW3:H0YM53:H0YMP9:P12644:V9GYF1	NP_001193.2:NP_570911.2:NP_570912.2:XP_005268072.1	renal agenesis, unilateral	NA
Matrisome-associated	Secreted Factors	BMP6	bone morphogenetic protein 6	1073	P22004	NP_001709.1	hemochromatosis type 5	NA
Matrisome-associated	Secreted Factors	CCBE1	collagen and calcium binding EGF domains 1	29426	K7EQ81:Q6UXH8	NP_597716.1:XP_005266705.1:XP_005266706.1:XP_006722456.1	Hennekam lymphangiectasia-lymphedema syndrome 1	NA
Matrisome-associated	Secreted Factors	CCBE1	collagen and calcium binding EGF domains 1	29426	K7EQ81:Q6UXH8	NP_597716.1:XP_005266705.1:XP_005266706.1:XP_006722456.1	Hennekam syndrome	NA
Matrisome-associated	Secreted Factors	CCL5	chemokine (C-C motif) ligand 5	10632	K7EJM0:P13501	NP_002976.2	HIV-1 disease, delayed progression of (3)	NA
Matrisome-associated	Secreted Factors	CCL5	chemokine (C-C motif) ligand 5	10632	K7EJM0:P13501	NP_002976.2	HIV-1 disease, rapid progression of (3)	NA
Matrisome-associated	Secreted Factors	CFC1	cripto, FRL-1, cryptic family 1	18292	P0CG37	NP_001257349.1:NP_001257350.1:NP_115934.1	HETEROTAXY, VISCERAL, 2, AUTOSOMAL	p.ARG112CYS
Matrisome-associated	Secreted Factors	CFC1	cripto, FRL-1, cryptic family 1	18292	P0CG37	NP_001257349.1:NP_001257350.1:NP_115934.1	Double-outlet right ventricle, 217095 (3)	NA
Matrisome-associated	Secreted Factors	CFC1	cripto, FRL-1, cryptic family 1	18292	P0CG37	NP_001257349.1:NP_001257350.1:NP_115934.1	Heterotaxy, visceral, 605376 (3)	NA
Matrisome-associated	Secreted Factors	CFC1	cripto, FRL-1, cryptic family 1	18292	P0CG37	NP_001257349.1:NP_001257350.1:NP_115934.1	Transposition of great arteries, dextro-looped, 217095 (3)	NA
Matrisome-associated	Secreted Factors	CFC1	cripto, FRL-1, cryptic family 1	18292	P0CG37	NP_001257349.1:NP_001257350.1:NP_115934.1	heterotaxy, visceral, 2, autosomal	NA
Matrisome-associated	Secreted Factors	CHRDL1	chordin-like 1	29861	D3YTA8:Q9BU40	NP_001137453.1:NP_001137454.1:NP_001137455.2:NP_660277.2:XP_005262278.1:XP_005262279.1	isolated congenital megalocornea	NA
Matrisome-associated	Secreted Factors	CLCF1	cardiotrophin-like cytokine factor 1	17412	Q9UBD9	NP_001159684.1:NP_037378.1	Cold-induced sweating syndrome	p.ARG197LEU
Matrisome-associated	Secreted Factors	CLCF1	cardiotrophin-like cytokine factor 1	17412	Q9UBD9	NP_001159684.1:NP_037378.1	COLD-INDUCED SWEATING SYNDROME 2	p.CYS16ARG
Matrisome-associated	Secreted Factors	CLCF1	cardiotrophin-like cytokine factor 1	17412	Q9UBD9	NP_001159684.1:NP_037378.1	Cold-induced sweating syndrome 2	p.TER216ARG
Matrisome-associated	Secreted Factors	CLCF1	cardiotrophin-like cytokine factor 1	17412	Q9UBD9	NP_001159684.1:NP_037378.1	Cold-induced sweating syndrome	p.TYR107TER
Matrisome-associated	Secreted Factors	CLCF1	cardiotrophin-like cytokine factor 1	17412	Q9UBD9	NP_001159684.1:NP_037378.1	cold-induced sweating syndrome	NA
Matrisome-associated	Secreted Factors	CLCF1	cardiotrophin-like cytokine factor 1	17412	Q9UBD9	NP_001159684.1:NP_037378.1	cold-induced sweating syndrome 2	NA
Matrisome-associated	Secreted Factors	CLCF1	cardiotrophin-like cytokine factor 1	17412	Q9UBD9	NP_001159684.1:NP_037378.1	Crisponi syndrome	NA
Matrisome-associated	Secreted Factors	CRLF1	cytokine receptor-like factor 1	2364	M0QZL6:O75462	NP_004741.1	COLD-INDUCED SWEATING SYNDROME 1	p.ARG277TER
Matrisome-associated	Secreted Factors	CRLF1	cytokine receptor-like factor 1	2364	M0QZL6:O75462	NP_004741.1	Cold-induced sweating syndrome 1	p.ARG312HIS
Matrisome-associated	Secreted Factors	CRLF1	cytokine receptor-like factor 1	2364	M0QZL6:O75462	NP_004741.1	Cold Induced Sweating Syndrome	p.ARG81HIS
Matrisome-associated	Secreted Factors	CRLF1	cytokine receptor-like factor 1	2364	M0QZL6:O75462	NP_004741.1	Cold Induced Sweating Syndrome	p.GLN180TER
Matrisome-associated	Secreted Factors	CRLF1	cytokine receptor-like factor 1	2364	M0QZL6:O75462	NP_004741.1	Cold Induced Sweating Syndrome	p.LEU374ARG
Matrisome-associated	Secreted Factors	CRLF1	cytokine receptor-like factor 1	2364	M0QZL6:O75462	NP_004741.1	COLD-INDUCED SWEATING SYNDROME 1	p.LYS368TER
Matrisome-associated	Secreted Factors	CRLF1	cytokine receptor-like factor 1	2364	M0QZL6:O75462	NP_004741.1	Cold Induced Sweating Syndrome	p.PRO138LEU
Matrisome-associated	Secreted Factors	CRLF1	cytokine receptor-like factor 1	2364	M0QZL6:O75462	NP_004741.1	Cold Induced Sweating Syndrome	p.TRP284CYS
Matrisome-associated	Secreted Factors	CRLF1	cytokine receptor-like factor 1	2364	M0QZL6:O75462	NP_004741.1	COLD-INDUCED SWEATING SYNDROME 1	p.TRP76GLY
Matrisome-associated	Secreted Factors	CRLF1	cytokine receptor-like factor 1	2364	M0QZL6:O75462	NP_004741.1	Cold-induced sweating syndrome, 272430 (3)	NA
Matrisome-associated	Secreted Factors	CRLF1	cytokine receptor-like factor 1	2364	M0QZL6:O75462	NP_004741.1	cold-induced sweating syndrome	NA
Matrisome-associated	Secreted Factors	CRLF1	cytokine receptor-like factor 1	2364	M0QZL6:O75462	NP_004741.1	Crisponi syndrome	NA
Matrisome-associated	Secreted Factors	CRLF1	cytokine receptor-like factor 1	2364	M0QZL6:O75462	NP_004741.1	idiopathic achalasia	NA
Matrisome-associated	Secreted Factors	CXCL12	chemokine (C-X-C motif) ligand 12 (stromal cell-derived factor 1)	10672	P48061	NP_000600.1:NP_001029058.1:NP_001171605.1:NP_001264919.1:NP_954637.1	AIDS, resistance to (3)	NA
Matrisome-associated	Secreted Factors	DHH	desert hedgehog homolog (Drosophila)	2865	O43323	NP_066382.1	46,XY gonadal dysgenesis, complete, dhh-related	p.LEU162PRO
Matrisome-associated	Secreted Factors	DHH	desert hedgehog homolog (Drosophila)	2865	O43323	NP_066382.1	46,XY GONADAL DYSGENESIS, PARTIAL, WITH MINIFASCICULAR NEUROPATHY	p.MET1THR
Matrisome-associated	Secreted Factors	DHH	desert hedgehog homolog (Drosophila)	2865	O43323	NP_066382.1	Gonadal dysgenesis, 46XY, partial, with minifascicular neuropathy, 607080 (3)	NA
Matrisome-associated	Secreted Factors	DHH	desert hedgehog homolog (Drosophila)	2865	O43323	NP_066382.1	,XY complete gonadal dysgenesis	NA
Matrisome-associated	Secreted Factors	DHH	desert hedgehog homolog (Drosophila)	2865	O43323	NP_066382.1	,XY gonadal dysgenesis-motor and sensory neuropathy syndrome	NA
Matrisome-associated	Secreted Factors	DHH	desert hedgehog homolog (Drosophila)	2865	O43323	NP_066382.1	,XY sex reversal 7	NA
Matrisome-associated	Secreted Factors	EDA	ectodysplasin A	3157	D6RA95:Q92838	NP_001005609.1:NP_001005610.2:NP_001005612.2:NP_001005613.1:NP_001390.1	Ectodermal dysplasia 1, hypohidrotic, X-linked	p.ALA349THR
Matrisome-associated	Secreted Factors	EDA	ectodysplasin A	3157	D6RA95:Q92838	NP_001005609.1:NP_001005610.2:NP_001005612.2:NP_001005613.1:NP_001390.1	Ectodermal dysplasia	p.ARG155CYS
Matrisome-associated	Secreted Factors	EDA	ectodysplasin A	3157	D6RA95:Q92838	NP_001005609.1:NP_001005610.2:NP_001005612.2:NP_001005613.1:NP_001390.1	Ectodermal dysplasia	p.ARG156CYS
Matrisome-associated	Secreted Factors	EDA	ectodysplasin A	3157	D6RA95:Q92838	NP_001005609.1:NP_001005610.2:NP_001005612.2:NP_001005613.1:NP_001390.1	Ectodermal dysplasia	p.ARG69LEU
Matrisome-associated	Secreted Factors	EDA	ectodysplasin A	3157	D6RA95:Q92838	NP_001005609.1:NP_001005610.2:NP_001005612.2:NP_001005613.1:NP_001390.1	Ectodermal dysplasia	p.GLN23TER
Matrisome-associated	Secreted Factors	EDA	ectodysplasin A	3157	D6RA95:Q92838	NP_001005609.1:NP_001005610.2:NP_001005612.2:NP_001005613.1:NP_001390.1	Ectodermal dysplasia	p.GLU63LYS
Matrisome-associated	Secreted Factors	EDA	ectodysplasin A	3157	D6RA95:Q92838	NP_001005609.1:NP_001005610.2:NP_001005612.2:NP_001005613.1:NP_001390.1	Ectodermal dysplasia	p.GLY224ALA
Matrisome-associated	Secreted Factors	EDA	ectodysplasin A	3157	D6RA95:Q92838	NP_001005609.1:NP_001005610.2:NP_001005612.2:NP_001005613.1:NP_001390.1	Ectodermal dysplasia	p.PRO209LEU
Matrisome-associated	Secreted Factors	EDA	ectodysplasin A	3157	D6RA95:Q92838	NP_001005609.1:NP_001005610.2:NP_001005612.2:NP_001005613.1:NP_001390.1	Ectodermal dysplasia	p.TYR61HIS
Matrisome-associated	Secreted Factors	EDA	ectodysplasin A	3157	D6RA95:Q92838	NP_001005609.1:NP_001005610.2:NP_001005612.2:NP_001005613.1:NP_001390.1	Ectodermal dysplasia	p.TYR61TER
Matrisome-associated	Secreted Factors	EDA	ectodysplasin A	3157	D6RA95:Q92838	NP_001005609.1:NP_001005610.2:NP_001005612.2:NP_001005613.1:NP_001390.1	Ectodermal dysplasia-1, anhidrotic, 305100 (3)	NA
Matrisome-associated	Secreted Factors	EDA	ectodysplasin A	3157	D6RA95:Q92838	NP_001005609.1:NP_001005610.2:NP_001005612.2:NP_001005613.1:NP_001390.1	tooth agenesis	NA
Matrisome-associated	Secreted Factors	EDA	ectodysplasin A	3157	D6RA95:Q92838	NP_001005609.1:NP_001005610.2:NP_001005612.2:NP_001005613.1:NP_001390.1	tooth agenesis, selective, X-linked, 1	NA
Matrisome-associated	Secreted Factors	EDA	ectodysplasin A	3157	D6RA95:Q92838	NP_001005609.1:NP_001005610.2:NP_001005612.2:NP_001005613.1:NP_001390.1	X-linked hypohidrotic ectodermal dysplasia	NA
Matrisome-associated	Secreted Factors	EGF	epidermal growth factor (beta-urogastrone)	3229	P01133	NP_001171601.1:NP_001171602.1:NP_001954.2	Hypomagnesemia 4, renal	p.PRO1070LEU
Matrisome-associated	Secreted Factors	EGF	epidermal growth factor (beta-urogastrone)	3229	P01133	NP_001171601.1:NP_001171602.1:NP_001954.2	familial primary hypomagnesemia with normocalciuria and normocalcemia	NA
Matrisome-associated	Secreted Factors	EGF	epidermal growth factor (beta-urogastrone)	3229	P01133	NP_001171601.1:NP_001171602.1:NP_001954.2	renal hypomagnesemia 4	NA
Matrisome-associated	Secreted Factors	EPO	erythropoietin	3415	P01588	NP_000790.2	autosomal dominant secondary polycythemia	NA
Matrisome-associated	Secreted Factors	EPO	erythropoietin	3415	P01588	NP_000790.2	erythrocytosis, familial, 5	NA
Matrisome-associated	Secreted Factors	FASLG	Fas ligand (TNF superfamily, member 6)	11936	P48023	NP_000630.1	autoimmune lymphoproliferative syndrome	NA
Matrisome-associated	Secreted Factors	FASLG	Fas ligand (TNF superfamily, member 6)	11936	P48023	NP_000630.1	autoimmune lymphoproliferative syndrome type 1	NA
Matrisome-associated	Secreted Factors	FGF10	fibroblast growth factor 10	3666	D6RG33:O15520	NP_004456.1:XP_005248321.1	Aplasia of lacrimal and salivary glands	p.ARG193TER
Matrisome-associated	Secreted Factors	FGF10	fibroblast growth factor 10	3666	D6RG33:O15520	NP_004456.1:XP_005248321.1	Aplasia of lacrimal and salivary glands	p.ARG80SER
Matrisome-associated	Secreted Factors	FGF10	fibroblast growth factor 10	3666	D6RG33:O15520	NP_004456.1:XP_005248321.1	Lacrimo-auriculo-dento-digital syndrome	p.CYS106PHE
Matrisome-associated	Secreted Factors	FGF10	fibroblast growth factor 10	3666	D6RG33:O15520	NP_004456.1:XP_005248321.1	Aplasia of lacrimal and salivary glands	p.GLY138GLU
Matrisome-associated	Secreted Factors	FGF10	fibroblast growth factor 10	3666	D6RG33:O15520	NP_004456.1:XP_005248321.1	Lacrimo-auriculo-dento-digital syndrome	p.ILE156ARG
Matrisome-associated	Secreted Factors	FGF10	fibroblast growth factor 10	3666	D6RG33:O15520	NP_004456.1:XP_005248321.1	APLASIA OF LACRIMAL AND SALIVARY GLANDS	p.LYS137TER
Matrisome-associated	Secreted Factors	FGF10	fibroblast growth factor 10	3666	D6RG33:O15520	NP_004456.1:XP_005248321.1	Aplasia of lacrimal and salivary glands, 180920 (3)	NA
Matrisome-associated	Secreted Factors	FGF10	fibroblast growth factor 10	3666	D6RG33:O15520	NP_004456.1:XP_005248321.1	aplasia of lacrimal and salivary glands	NA
Matrisome-associated	Secreted Factors	FGF10	fibroblast growth factor 10	3666	D6RG33:O15520	NP_004456.1:XP_005248321.1	LADD syndrome	NA
Matrisome-associated	Secreted Factors	FGF12	fibroblast growth factor 12	3668	C9JEN8:C9JIN3:C9JUK8:H7C1L8:P61328	NP_004104.3:NP_066360.1	epileptic encephalopathy, early infantile, 47	NA
Matrisome-associated	Secreted Factors	FGF12	fibroblast growth factor 12	3668	C9JEN8:C9JIN3:C9JUK8:H7C1L8:P61328	NP_004104.3:NP_066360.1	undetermined early-onset epileptic encephalopathy	NA
Matrisome-associated	Secreted Factors	FGF14	fibroblast growth factor 14	3671	Q92915	NP_004106.1:NP_787125.1	SPINOCEREBELLAR ATAXIA 27	p.PHE145SER
Matrisome-associated	Secreted Factors	FGF14	fibroblast growth factor 14	3671	Q92915	NP_004106.1:NP_787125.1	Spinocerebellar ataxia-27, 609307 (3)	NA
Matrisome-associated	Secreted Factors	FGF14	fibroblast growth factor 14	3671	Q92915	NP_004106.1:NP_787125.1	spinocerebellar ataxia type 27	NA
Matrisome-associated	Secreted Factors	FGF16	fibroblast growth factor 16	3672	H0Y5L6:O43320	NP_003859.1	syndactyly type 8	NA
Matrisome-associated	Secreted Factors	FGF17	fibroblast growth factor 17	3673	O60258	NP_003858.1:XP_005273733.1	hypogonadotropic hypogonadism	NA
Matrisome-associated	Secreted Factors	FGF17	fibroblast growth factor 17	3673	O60258	NP_003858.1:XP_005273733.1	hypogonadotropic hypogonadism 20 with or without anosmia	NA
Matrisome-associated	Secreted Factors	FGF17	fibroblast growth factor 17	3673	O60258	NP_003858.1:XP_005273733.1	Kallmann syndrome	NA
Matrisome-associated	Secreted Factors	FGF20	fibroblast growth factor 20	3677	H0YAT9:Q9NP95	NP_062825.1	bilateral renal agenesis	NA
Matrisome-associated	Secreted Factors	FGF23	fibroblast growth factor 23	3680	Q9GZV9	NP_065689.1	ADHR	p.ARG176GLN
Matrisome-associated	Secreted Factors	FGF23	fibroblast growth factor 23	3680	Q9GZV9	NP_065689.1	ADHR	p.ARG179GLN
Matrisome-associated	Secreted Factors	FGF23	fibroblast growth factor 23	3680	Q9GZV9	NP_065689.1	ADHR	p.ARG179TRP
Matrisome-associated	Secreted Factors	FGF23	fibroblast growth factor 23	3680	Q9GZV9	NP_065689.1	Autosomal dominant hypophosphatemic rickets	p.GLN54HIS
Matrisome-associated	Secreted Factors	FGF23	fibroblast growth factor 23	3680	Q9GZV9	NP_065689.1	Tumoral calcinosis, familial, hyperphosphatemic	p.MET96THR
Matrisome-associated	Secreted Factors	FGF23	fibroblast growth factor 23	3680	Q9GZV9	NP_065689.1	Tumoral calcinosis, familial, hyperphosphatemic	p.SER129PHE
Matrisome-associated	Secreted Factors	FGF23	fibroblast growth factor 23	3680	Q9GZV9	NP_065689.1	HFTC	p.SER71GLY
Matrisome-associated	Secreted Factors	FGF23	fibroblast growth factor 23	3680	Q9GZV9	NP_065689.1	Calcinosis, tumoral, 211900 (3)	NA
Matrisome-associated	Secreted Factors	FGF23	fibroblast growth factor 23	3680	Q9GZV9	NP_065689.1	Hypophosphatemic rickets, autosomal dominant, 193100 (3)	NA
Matrisome-associated	Secreted Factors	FGF23	fibroblast growth factor 23	3680	Q9GZV9	NP_065689.1	autosomal dominant hypophosphatemic rickets	NA
Matrisome-associated	Secreted Factors	FGF23	fibroblast growth factor 23	3680	Q9GZV9	NP_065689.1	hyperphosphatemic familial tumoral calcinosis	NA
Matrisome-associated	Secreted Factors	FGF23	fibroblast growth factor 23	3680	Q9GZV9	NP_065689.1	tumoral calcinosis, hyperphosphatemic, familial, 2	NA
Matrisome-associated	Secreted Factors	FGF3	fibroblast growth factor 3 (murine mammary tumor virus integration site (v-int-2) oncogene homolog)	3681	P11487	NP_005238.1	Deafness with labyrinthine aplasia microtia and microdontia (LAMM)	p.ARG104TER
Matrisome-associated	Secreted Factors	FGF3	fibroblast growth factor 3 (murine mammary tumor virus integration site (v-int-2) oncogene homolog)	3681	P11487	NP_005238.1	Deafness with labyrinthine aplasia microtia and microdontia (LAMM)	p.ARG95TRP
Matrisome-associated	Secreted Factors	FGF3	fibroblast growth factor 3 (murine mammary tumor virus integration site (v-int-2) oncogene homolog)	3681	P11487	NP_005238.1	Deafness with labyrinthine aplasia microtia and microdontia (LAMM)	p.CYS50TER
Matrisome-associated	Secreted Factors	FGF3	fibroblast growth factor 3 (murine mammary tumor virus integration site (v-int-2) oncogene homolog)	3681	P11487	NP_005238.1	Deafness with labyrinthine aplasia microtia and microdontia (LAMM)	p.GLY66CYS
Matrisome-associated	Secreted Factors	FGF3	fibroblast growth factor 3 (murine mammary tumor virus integration site (v-int-2) oncogene homolog)	3681	P11487	NP_005238.1	Deafness with labyrinthine aplasia microtia and microdontia (LAMM)	p.LEU6PRO
Matrisome-associated	Secreted Factors	FGF3	fibroblast growth factor 3 (murine mammary tumor virus integration site (v-int-2) oncogene homolog)	3681	P11487	NP_005238.1	Deafness with labyrinthine aplasia microtia and microdontia (LAMM)	p.SER156PRO
Matrisome-associated	Secreted Factors	FGF3	fibroblast growth factor 3 (murine mammary tumor virus integration site (v-int-2) oncogene homolog)	3681	P11487	NP_005238.1	Deafness with labyrinthine aplasia microtia and microdontia (LAMM)	p.TYR106CYS
Matrisome-associated	Secreted Factors	FGF3	fibroblast growth factor 3 (murine mammary tumor virus integration site (v-int-2) oncogene homolog)	3681	P11487	NP_005238.1	Deafness with labyrinthine aplasia microtia and microdontia (LAMM)	p.TYR49CYS
Matrisome-associated	Secreted Factors	FGF3	fibroblast growth factor 3 (murine mammary tumor virus integration site (v-int-2) oncogene homolog)	3681	P11487	NP_005238.1	deafness with labyrinthine aplasia, microtia, and microdontia	NA
Matrisome-associated	Secreted Factors	FGF5	fibroblast growth factor 5	3683	H0Y9E2:P12034	NP_004455.2:NP_149134.1	familial isolated trichomegaly	NA
Matrisome-associated	Secreted Factors	FGF5	fibroblast growth factor 5	3683	H0Y9E2:P12034	NP_004455.2:NP_149134.1	trichomegaly	NA
Matrisome-associated	Secreted Factors	FGF8	fibroblast growth factor 8 (androgen-induced)	3686	P55075:R4GMQ3	NP_006110.1:NP_149353.1:NP_149354.1:NP_149355.1	HH6	p.ARG116GLY
Matrisome-associated	Secreted Factors	FGF8	fibroblast growth factor 8 (androgen-induced)	3686	P55075:R4GMQ3	NP_006110.1:NP_149353.1:NP_149354.1:NP_149355.1	HH6	p.HIS14ASN
Matrisome-associated	Secreted Factors	FGF8	fibroblast growth factor 8 (androgen-induced)	3686	P55075:R4GMQ3	NP_006110.1:NP_149353.1:NP_149354.1:NP_149355.1	HH6	p.LYS89GLU
Matrisome-associated	Secreted Factors	FGF8	fibroblast growth factor 8 (androgen-induced)	3686	P55075:R4GMQ3	NP_006110.1:NP_149353.1:NP_149354.1:NP_149355.1	HH6	p.PHE40LEU
Matrisome-associated	Secreted Factors	FGF8	fibroblast growth factor 8 (androgen-induced)	3686	P55075:R4GMQ3	NP_006110.1:NP_149353.1:NP_149354.1:NP_149355.1	HYPOGONADOTROPIC HYPOGONADISM 6 WITH ANOSMIA	p.PRO26LEU
Matrisome-associated	Secreted Factors	FGF8	fibroblast growth factor 8 (androgen-induced)	3686	P55075:R4GMQ3	NP_006110.1:NP_149353.1:NP_149354.1:NP_149355.1	alobar holoprosencephaly	NA
Matrisome-associated	Secreted Factors	FGF8	fibroblast growth factor 8 (androgen-induced)	3686	P55075:R4GMQ3	NP_006110.1:NP_149353.1:NP_149354.1:NP_149355.1	hypogonadotropic hypogonadism	NA
Matrisome-associated	Secreted Factors	FGF8	fibroblast growth factor 8 (androgen-induced)	3686	P55075:R4GMQ3	NP_006110.1:NP_149353.1:NP_149354.1:NP_149355.1	hypogonadotropic hypogonadism 6 with or without anosmia	NA
Matrisome-associated	Secreted Factors	FGF8	fibroblast growth factor 8 (androgen-induced)	3686	P55075:R4GMQ3	NP_006110.1:NP_149353.1:NP_149354.1:NP_149355.1	Kallmann syndrome	NA
Matrisome-associated	Secreted Factors	FGF8	fibroblast growth factor 8 (androgen-induced)	3686	P55075:R4GMQ3	NP_006110.1:NP_149353.1:NP_149354.1:NP_149355.1	lobar holoprosencephaly	NA
Matrisome-associated	Secreted Factors	FGF8	fibroblast growth factor 8 (androgen-induced)	3686	P55075:R4GMQ3	NP_006110.1:NP_149353.1:NP_149354.1:NP_149355.1	microform holoprosencephaly	NA
Matrisome-associated	Secreted Factors	FGF8	fibroblast growth factor 8 (androgen-induced)	3686	P55075:R4GMQ3	NP_006110.1:NP_149353.1:NP_149354.1:NP_149355.1	midline interhemispheric variant of holoprosencephaly	NA
Matrisome-associated	Secreted Factors	FGF8	fibroblast growth factor 8 (androgen-induced)	3686	P55075:R4GMQ3	NP_006110.1:NP_149353.1:NP_149354.1:NP_149355.1	semilobar holoprosencephaly	NA
Matrisome-associated	Secreted Factors	FGF8	fibroblast growth factor 8 (androgen-induced)	3686	P55075:R4GMQ3	NP_006110.1:NP_149353.1:NP_149354.1:NP_149355.1	septopreoptic holoprosencephaly	NA
Matrisome-associated	Secreted Factors	FGF9	fibroblast growth factor 9 (glia-activating factor)	3687	P31371	NP_002001.1	Multiple synostoses syndrome	p.SER99ASN
Matrisome-associated	Secreted Factors	FGF9	fibroblast growth factor 9 (glia-activating factor)	3687	P31371	NP_002001.1	multiple synostoses syndrome	NA
Matrisome-associated	Secreted Factors	FGF9	fibroblast growth factor 9 (glia-activating factor)	3687	P31371	NP_002001.1	multiple synostoses syndrome 3	NA
Matrisome-associated	Secreted Factors	FLG	filaggrin	3748	P20930	NP_002007.1	DERMATITIS, ATOPIC, 2	p.ARG501TER
Matrisome-associated	Secreted Factors	FLG	filaggrin	3748	P20930	NP_002007.1	DERMATITIS, ATOPIC, 2	p.SER2554TER
Matrisome-associated	Secreted Factors	FLG	filaggrin	3748	P20930	NP_002007.1	autosomal dominant ichthyosis vulgaris	NA
Matrisome-associated	Secreted Factors	FLG2	filaggrin family member 2	33276	Q5D862	NP_001014364.1	peeling skin syndrome 6	NA
Matrisome-associated	Secreted Factors	FLG2	filaggrin family member 2	33276	Q5D862	NP_001014364.1	peeling skin syndrome type A	NA
Matrisome-associated	Secreted Factors	FRZB	frizzled-related protein	3959	Q92765	NP_001454.2	Hip osteoarthritis	p.ARG200TRP
Matrisome-associated	Secreted Factors	FRZB	frizzled-related protein	3959	Q92765	NP_001454.2	Hip osteoarthritis	p.ARG324GLY
Matrisome-associated	Secreted Factors	FRZB	frizzled-related protein	3959	Q92765	NP_001454.2	Osteoarthritis of hip, female-specific, susceptibility to, 165720 (3)	NA
Matrisome-associated	Secreted Factors	GDF1	growth differentiation factor 1	4214	P27539	NP_001483.3	Congenital heart defects	p.CYS227TER
Matrisome-associated	Secreted Factors	GDF1	growth differentiation factor 1	4214	P27539	NP_001483.3	Congenital heart defects	p.CYS267TYR
Matrisome-associated	Secreted Factors	GDF1	growth differentiation factor 1	4214	P27539	NP_001483.3	dextro-looped transposition of the great arteries 3	NA
Matrisome-associated	Secreted Factors	GDF1	growth differentiation factor 1	4214	P27539	NP_001483.3	right atrial isomerism (disease)	NA
Matrisome-associated	Secreted Factors	GDF2	growth differentiation factor 2	4217	Q9UK05	NP_057288.1	hereditary hemorrhagic telangiectasia	NA
Matrisome-associated	Secreted Factors	GDF2	growth differentiation factor 2	4217	Q9UK05	NP_057288.1	telangiectasia, hereditary hemorrhagic, type 5	NA
Matrisome-associated	Secreted Factors	GDF3	growth differentiation factor 3	4218	Q9NR23	NP_065685.1	colobomatous microphthalmia	NA
Matrisome-associated	Secreted Factors	GDF3	growth differentiation factor 3	4218	Q9NR23	NP_065685.1	isolated anophthalmia-microphthalmia syndrome	NA
Matrisome-associated	Secreted Factors	GDF3	growth differentiation factor 3	4218	Q9NR23	NP_065685.1	isolated Klippel-Feil syndrome	NA
Matrisome-associated	Secreted Factors	GDF3	growth differentiation factor 3	4218	Q9NR23	NP_065685.1	isolated microphthalmia 7	NA
Matrisome-associated	Secreted Factors	GDF3	growth differentiation factor 3	4218	Q9NR23	NP_065685.1	Klippel-Feil syndrome 3, autosomal dominant	NA
Matrisome-associated	Secreted Factors	GDF3	growth differentiation factor 3	4218	Q9NR23	NP_065685.1	microphthalmia, isolated, with coloboma 6	NA
Matrisome-associated	Secreted Factors	GDF5	growth differentiation factor 5	4220	P43026	NP_000548.2	Brachydactyly type C	p.ARG301TER
Matrisome-associated	Secreted Factors	GDF5	growth differentiation factor 5	4220	P43026	NP_000548.2	DPS	p.ARG378GLN
Matrisome-associated	Secreted Factors	GDF5	growth differentiation factor 5	4220	P43026	NP_000548.2	Cushing's symphalangism	p.ARG438LEU
Matrisome-associated	Secreted Factors	GDF5	growth differentiation factor 5	4220	P43026	NP_000548.2	AMDG	p.CYS400TYR
Matrisome-associated	Secreted Factors	GDF5	growth differentiation factor 5	4220	P43026	NP_000548.2	Cushing's symphalangism	p.GLU491LYS
Matrisome-associated	Secreted Factors	GDF5	growth differentiation factor 5	4220	P43026	NP_000548.2	Brachydactyly, type C	p.LEU373ARG
Matrisome-associated	Secreted Factors	GDF5	growth differentiation factor 5	4220	P43026	NP_000548.2	BDA2	p.LEU441PRO
Matrisome-associated	Secreted Factors	GDF5	growth differentiation factor 5	4220	P43026	NP_000548.2	DPS	p.PRO436THR
Matrisome-associated	Secreted Factors	GDF5	growth differentiation factor 5	4220	P43026	NP_000548.2	Multiple synostoses syndrome 2	p.SER475ASN
Matrisome-associated	Secreted Factors	GDF5	growth differentiation factor 5	4220	P43026	NP_000548.2	Brachydactyly type C	p.TYR487TER
Matrisome-associated	Secreted Factors	GDF5	growth differentiation factor 5	4220	P43026	NP_000548.2	Acromesomelic dysplasia, Hunter-Thompson type, 201250 (3)	NA
Matrisome-associated	Secreted Factors	GDF5	growth differentiation factor 5	4220	P43026	NP_000548.2	Brachydactyly, type C, 113100 (3)	NA
Matrisome-associated	Secreted Factors	GDF5	growth differentiation factor 5	4220	P43026	NP_000548.2	Fibular hypoplasia and complex brachydactyly, 228900 (3)	NA
Matrisome-associated	Secreted Factors	GDF5	growth differentiation factor 5	4220	P43026	NP_000548.2	Chondrodysplasia, Grebe type, 200700 (3)	NA
Matrisome-associated	Secreted Factors	GDF5	growth differentiation factor 5	4220	P43026	NP_000548.2	acromesomelic dysplasia, Grebe type	NA
Matrisome-associated	Secreted Factors	GDF5	growth differentiation factor 5	4220	P43026	NP_000548.2	acromesomelic dysplasia, Hunter-Thompson type	NA
Matrisome-associated	Secreted Factors	GDF5	growth differentiation factor 5	4220	P43026	NP_000548.2	angel-shaped phalango-epiphyseal dysplasia	NA
Matrisome-associated	Secreted Factors	GDF5	growth differentiation factor 5	4220	P43026	NP_000548.2	brachydactyly type A1	NA
Matrisome-associated	Secreted Factors	GDF5	growth differentiation factor 5	4220	P43026	NP_000548.2	brachydactyly type A1C	NA
Matrisome-associated	Secreted Factors	GDF5	growth differentiation factor 5	4220	P43026	NP_000548.2	brachydactyly type A2	NA
Matrisome-associated	Secreted Factors	GDF5	growth differentiation factor 5	4220	P43026	NP_000548.2	brachydactyly type C	NA
Matrisome-associated	Secreted Factors	GDF5	growth differentiation factor 5	4220	P43026	NP_000548.2	fibular hypoplasia and complex brachydactyly	NA
Matrisome-associated	Secreted Factors	GDF5	growth differentiation factor 5	4220	P43026	NP_000548.2	multiple synostoses syndrome	NA
Matrisome-associated	Secreted Factors	GDF5	growth differentiation factor 5	4220	P43026	NP_000548.2	multiple synostoses syndrome 2	NA
Matrisome-associated	Secreted Factors	GDF5	growth differentiation factor 5	4220	P43026	NP_000548.2	proximal symphalangism (disease)	NA
Matrisome-associated	Secreted Factors	GDF5	growth differentiation factor 5	4220	P43026	NP_000548.2	symphalangism, proximal, 1B	NA
Matrisome-associated	Secreted Factors	GDF6	growth differentiation factor 6	4221	Q6KF10	NP_001001557.1	Klippel-Feil syndrome	p.ALA249GLU
Matrisome-associated	Secreted Factors	GDF6	growth differentiation factor 6	4221	Q6KF10	NP_001001557.1	MCOP4	p.GLN253LEU
Matrisome-associated	Secreted Factors	GDF6	growth differentiation factor 6	4221	Q6KF10	NP_001001557.1	KLIPPEL-FEIL SYNDROME 1, AUTOSOMAL DOMINANT	p.GLY42VAL
Matrisome-associated	Secreted Factors	GDF6	growth differentiation factor 6	4221	Q6KF10	NP_001001557.1	Klippel-Feil syndrome	p.LEU289PRO
Matrisome-associated	Secreted Factors	GDF6	growth differentiation factor 6	4221	Q6KF10	NP_001001557.1	Klippel-Feil syndrome 1, autosomal dominant	p.LYS424ARG
Matrisome-associated	Secreted Factors	GDF6	growth differentiation factor 6	4221	Q6KF10	NP_001001557.1	MCOP4	p.PRO327HIS
Matrisome-associated	Secreted Factors	GDF6	growth differentiation factor 6	4221	Q6KF10	NP_001001557.1	isolated Klippel-Feil syndrome	NA
Matrisome-associated	Secreted Factors	GDF6	growth differentiation factor 6	4221	Q6KF10	NP_001001557.1	isolated microphthalmia 4	NA
Matrisome-associated	Secreted Factors	GDF6	growth differentiation factor 6	4221	Q6KF10	NP_001001557.1	Klippel-Feil syndrome 1, autosomal dominant	NA
Matrisome-associated	Secreted Factors	GDF6	growth differentiation factor 6	4221	Q6KF10	NP_001001557.1	Leber congenital amaurosis	NA
Matrisome-associated	Secreted Factors	GDF6	growth differentiation factor 6	4221	Q6KF10	NP_001001557.1	Leber congenital amaurosis 17	NA
Matrisome-associated	Secreted Factors	GDF6	growth differentiation factor 6	4221	Q6KF10	NP_001001557.1	microphthalmia, isolated, with coloboma 6	NA
Matrisome-associated	Secreted Factors	GDF6	growth differentiation factor 6	4221	Q6KF10	NP_001001557.1	multiple synostoses syndrome 4	NA
Matrisome-associated	Secreted Factors	GDNF	glial cell derived neurotrophic factor	4232	P39905	NP_000505.1:NP_001177397.1:NP_001177398.1:NP_001265027.1:NP_954701.1	CENTRAL HYPOVENTILATION SYNDROME, CONGENITAL	p.ARG93TRP
Matrisome-associated	Secreted Factors	GDNF	glial cell derived neurotrophic factor	4232	P39905	NP_000505.1:NP_001177397.1:NP_001177398.1:NP_001265027.1:NP_954701.1	Hirschsprung disease	p.ASP150ASN
Matrisome-associated	Secreted Factors	GDNF	glial cell derived neurotrophic factor	4232	P39905	NP_000505.1:NP_001177397.1:NP_001177398.1:NP_001265027.1:NP_954701.1	Hirschsprung disease	p.ILE211MET
Matrisome-associated	Secreted Factors	GDNF	glial cell derived neurotrophic factor	4232	P39905	NP_000505.1:NP_001177397.1:NP_001177398.1:NP_001265027.1:NP_954701.1	Hirschsprung disease	p.THR154SER
Matrisome-associated	Secreted Factors	GDNF	glial cell derived neurotrophic factor	4232	P39905	NP_000505.1:NP_001177397.1:NP_001177398.1:NP_001265027.1:NP_954701.1	Central hypoventilation syndrome, 209880 (3)	NA
Matrisome-associated	Secreted Factors	GDNF	glial cell derived neurotrophic factor	4232	P39905	NP_000505.1:NP_001177397.1:NP_001177398.1:NP_001265027.1:NP_954701.1	Hirschsprung disease, 142623 (3)	NA
Matrisome-associated	Secreted Factors	GDNF	glial cell derived neurotrophic factor	4232	P39905	NP_000505.1:NP_001177397.1:NP_001177398.1:NP_001265027.1:NP_954701.1	congenital central hypoventilation syndrome	NA
Matrisome-associated	Secreted Factors	GH1	growth hormone 1	4261	B1A4G9:P01241	NP_000506.2:NP_072053.1:NP_072054.1:XP_005257275.1:XP_005257276.1:NP_072055.1	Autosomal dominant isolated somatotropin deficiency	p.ARG209HIS
Matrisome-associated	Secreted Factors	GH1	growth hormone 1	4261	B1A4G9:P01241	NP_000506.2:NP_072053.1:NP_072054.1:XP_005257275.1:XP_005257276.1:NP_072055.1	Kowarski syndrome	p.CYS79PHE
Matrisome-associated	Secreted Factors	GH1	growth hormone 1	4261	B1A4G9:P01241	NP_000506.2:NP_072053.1:NP_072054.1:XP_005257275.1:XP_005257276.1:NP_072055.1	Ateleiotic dwarfism	p.TRP20TER
Matrisome-associated	Secreted Factors	GH1	growth hormone 1	4261	B1A4G9:P01241	NP_000506.2:NP_072053.1:NP_072054.1:XP_005257275.1:XP_005257276.1:NP_072055.1	Isolated growth hormone deficiency, Illig type with absent GH and Kowarski type with bioinactive GH (3)	NA
Matrisome-associated	Secreted Factors	GH1	growth hormone 1	4261	B1A4G9:P01241	NP_000506.2:NP_072053.1:NP_072054.1:XP_005257275.1:XP_005257276.1:NP_072055.1	isolated growth hormone deficiency type IA	NA
Matrisome-associated	Secreted Factors	GH1	growth hormone 1	4261	B1A4G9:P01241	NP_000506.2:NP_072053.1:NP_072054.1:XP_005257275.1:XP_005257276.1:NP_072055.1	isolated growth hormone deficiency type IB	NA
Matrisome-associated	Secreted Factors	GH1	growth hormone 1	4261	B1A4G9:P01241	NP_000506.2:NP_072053.1:NP_072054.1:XP_005257275.1:XP_005257276.1:NP_072055.1	isolated growth hormone deficiency type II	NA
Matrisome-associated	Secreted Factors	GH1	growth hormone 1	4261	B1A4G9:P01241	NP_000506.2:NP_072053.1:NP_072054.1:XP_005257275.1:XP_005257276.1:NP_072055.1	short stature due to growth hormone qualitative anomaly	NA
Matrisome-associated	Secreted Factors	HCFC1	host cell factor C1 (VP16-accessory protein)	4839	A6NEM2:H7C1C4:P51610	NP_005325.2:XP_006724879.1:XP_006724878.1	methylmalonic acidemia with homocystinuria, type cblX	NA
Matrisome-associated	Secreted Factors	HCFC1	host cell factor C1 (VP16-accessory protein)	4839	A6NEM2:H7C1C4:P51610	NP_005325.2:XP_006724879.1:XP_006724878.1	non-syndromic X-linked intellectual disability	NA
Matrisome-associated	Secreted Factors	HGF	hepatocyte growth factor (hepapoietin A	NA	NA	NA	DEAFNESS, AUTOSOMAL RECESSIVE 39	p.SER165SER
Matrisome-associated	Secreted Factors	HGF	hepatocyte growth factor (hepapoietin A	NA	NA	NA	Fibromatosis, gingival, 135300 (3)	NA
Matrisome-associated	Secreted Factors	HGF	hepatocyte growth factor (hepapoietin A	NA	NA	NA	autosomal recessive nonsyndromic deafness	NA
Matrisome-associated	Secreted Factors	HGF	hepatocyte growth factor (hepapoietin A	NA	NA	NA	autosomal recessive nonsyndromic deafness 39	NA
Matrisome-associated	Secreted Factors	IFNG	interferon, gamma	5438	P01579	NP_000610.2	AIDS, rapid progression to, 609423 (3)	NA
Matrisome-associated	Secreted Factors	IFNG	interferon, gamma	5438	P01579	NP_000610.2	Aplastic anemia, 609135 (3)	NA
Matrisome-associated	Secreted Factors	IFNG	interferon, gamma	5438	P01579	NP_000610.2	Tuberculosis, susceptibility to, 607948 (3)	NA
Matrisome-associated	Secreted Factors	IFNG	interferon, gamma	5438	P01579	NP_000610.2	TSC2 angiomyolipomas, renal, modifier of, 191100 (3)	NA
Matrisome-associated	Secreted Factors	IGF1	insulin-like growth factor 1 (somatomedin C)	5464	P05019:Q13429	NP_000609.1:NP_001104754.1:NP_001104755.1:NP_001104753.1	Growth retardation	p.VAL92MET
Matrisome-associated	Secreted Factors	IGF1	insulin-like growth factor 1 (somatomedin C)	5464	P05019:Q13429	NP_000609.1:NP_001104754.1:NP_001104755.1:NP_001104753.1	Growth retardation with deafness and mental retardation due to IGF1 deficiency,	NA
Matrisome-associated	Secreted Factors	IGF2	insulin-like growth factor 2 (somatomedin A)	5466	P01344	NP_000603.1:NP_001007140.2:NP_001121070.1:NP_001278790.1:NP_001278791.1	Intrauterine and postnatal growth retardation (3)	NA
Matrisome-associated	Secreted Factors	IGF2	insulin-like growth factor 2 (somatomedin A)	5466	P01344	NP_000603.1:NP_001007140.2:NP_001121070.1:NP_001278790.1:NP_001278791.1	isolated hemihyperplasia	NA
Matrisome-associated	Secreted Factors	IGF2	insulin-like growth factor 2 (somatomedin A)	5466	P01344	NP_000603.1:NP_001007140.2:NP_001121070.1:NP_001278790.1:NP_001278791.1	Silver-Russell syndrome due to a point mutation	NA
Matrisome-associated	Secreted Factors	IHH	Indian hedgehog homolog (Drosophila)	5956	Q14623	NP_002172.2	Acrocapitofemoral dysplasia, 607778 (3)	NA
Matrisome-associated	Secreted Factors	IHH	Indian hedgehog homolog (Drosophila)	5956	Q14623	NP_002172.2	Brachydactyly, type A1, 112500 (3)	NA
Matrisome-associated	Secreted Factors	IHH	Indian hedgehog homolog (Drosophila)	5956	Q14623	NP_002172.2	acrocapitofemoral dysplasia	NA
Matrisome-associated	Secreted Factors	IHH	Indian hedgehog homolog (Drosophila)	5956	Q14623	NP_002172.2	brachydactyly type A1	NA
Matrisome-associated	Secreted Factors	IHH	Indian hedgehog homolog (Drosophila)	5956	Q14623	NP_002172.2	brachydactyly type A1A	NA
Matrisome-associated	Secreted Factors	IL10	interleukin 10	5962	P22301	NP_000563.1	Graft-versus-host disease, protection against (3)	NA
Matrisome-associated	Secreted Factors	IL10	interleukin 10	5962	P22301	NP_000563.1	HIV-1, susceptibility to (3)	NA
[truncated: 191 more rows]
