# Supplementary material for: The Human Extracellular Matrix Diseasome Reveals Genotype–Phenotype Associations with Clinical Implications for Age-Related Diseases
Source: Biomedicines. 2023 Apr 19;11(4):1212. doi: 10.3390/biomedicines11041212 (PMC10135578; doi:10.3390/biomedicines11041212)
Supplement: Supplementary file 1 [file biomedicines-11-01212-s001.zip › Table_S9_SNP and Matrisome Diseasome.xlsx]

## Sheet: Disease Category
Disease category	Description	Regex terms	Notes on regex terms
A	ECM-associated diseases	"Ehler", "Osteogenesis imperfecta, OI type", "Lupus", "Marfan", "Alpert", "Fraser", "Willebrand", "platelet", "diabetes mellitus, insulin-dependent, 2"	each line corresponds to a search query, queries assembled to lists much each occur in the target string, all queries are case-insensitive
B	Common diseases	list("diabetes", "insipidus"), list("monogenic", "diabetes"), list("neonatal", "diabetes"), list("young", "diabetes"), list("premature", "diabetes"), list("mody", "diabetes"), list("type 1", "diabetes"), "asthma", "autism", "Lissencephaly", "Schizophrenia", "seizures", "Muscular dystrophy", "Obesity", "stroke"	each line corresponds to a search query, queries assembled to lists much each occur in the target string, all queries are case-insensitive
C	Age-related diseases	"Osteoarthritis", "Osteoporosis", "Rheumatoid arthritis", "Alzheimer", "cancer", "tumor", "Carcinoma", "Melanoma", "brca", list("Diabetes", "type 2"), list("Diabetes", "age-related"), "Chronic obstructive pulmonary disease", "mortality", "age-related", "hearing loss", "fibrosis", "Cirrhosis", "Parkinson", "Hypertension", "cardiovascular", "heart", "coronary", "Atherosclerosis", "arrhythmia", "dem…	each line corresponds to a search query, queries assembled to lists much each occur in the target string, all queries are case-insensitive

## Sheet: Matri_Gene_CUI_Assignments_Dise
pre_processed_disease_term	gene	hgsv	ref	source	processed_disease_term	OMIM	all_cui	Disease categories
galactosialidosis, late infantile	CTSA	p.phe458val	NA	ClinVar/OMIM	galactosialidosis, late infantile	0	C4017292;C0268233
galactosialidosis, late infantile	CTSA	p.phe191fs	NA	ClinVar/OMIM	galactosialidosis, late infantile	0	C4017292;C0268233
raine syndrome	FAM20C	p.leu388arg	NA	ClinVar/OMIM	raine syndrome	0	C1850106
raine syndrome	FAM20C	p.arg549trp	NA	ClinVar/OMIM	raine syndrome	0	C1850106
raine syndrome	FAM20C	p.gly379glu	NA	ClinVar/OMIM	raine syndrome	0	C1850106
weill-marchesani syndrome 1	ADAMTS10	p.arg237ter	NA	ClinVar/OMIM	weill-marchesani syndrome 1	0	C1869114;C0265313
weill-marchesani syndrome 1	ADAMTS10	p.gln318ter	NA	ClinVar/OMIM	weill-marchesani syndrome 1	0	C1869114;C0265313
weill-marchesani syndrome 1	ADAMTS10	p.gly518asp	NA	ClinVar/OMIM	weill-marchesani syndrome 1	0	C1869114;C0265313
weill-marchesani syndrome 1	ADAMTS10	p.gly700cys	NA	ClinVar/OMIM	weill-marchesani syndrome 1	0	C1869114;C0265313
fraser syndrome 1	FRAS1	p.val2322fs	NA	ClinVar/OMIM	fraser syndrome 1	0	C4551480	A
atrioventricular septal defect, susceptibility to, 2	CRELD1	p.pro162ala	NA	ClinVar/OMIM	atrioventricular septal defect, susceptibility to, 2	0	C1853508
mucopolysaccharidosis, type ix (1 patient)	HYAL1	p.val251fs	NA	ClinVar/OMIM	mucopolysaccharidosis, type ix	0	C1291490
cutis laxa, autosomal recessive, type ic	LTBP4	p.gln1185fs	NA	ClinVar/OMIM	cutis laxa, autosomal recessive, type ic	0	C0268351;C2750804
cutis laxa, autosomal recessive, type ic	LTBP4	p.pro264fs	NA	ClinVar/OMIM	cutis laxa, autosomal recessive, type ic	0	C0268351;C2750804
epilepsy, lateral temporal lobe, autosomal dominant	LGI1	p.cys46arg	NA	ClinVar/OMIM	epilepsy, lateral temporal lobe, autosomal dominant	0	C1838062
omodysplasia 1	GPC6	p.leu260fs	NA	ClinVar/OMIM	omodysplasia 1	0	C1850318
camptodactyly-arthropathy-coxa vara-pericarditis syndrome	PRG4	p.ser1397ter	NA	ClinVar/OMIM	camptodactyly-arthropathy-coxa vara-pericarditis syndrome	0	C1859690
myasthenic syndrome, congenital, 5	COLQ	p.pro265fs	NA	ClinVar/OMIM	myasthenic syndrome, congenital, 5	0	C0751882
osteopetrosis, autosomal recessive 2	TNFSF11	p.val204fs	NA	ClinVar/OMIM	osteopetrosis, autosomal recessive 2	0	C4272578;C1850126
factor v and factor viii, combined deficiency of, 1, middle eastern jewish type	LMAN1	p.asp31fs	NA	ClinVar/OMIM	factor v and factor viii, combined deficiency of, 1, middle eastern jewish type	0	C1856883
acid-labile subunit deficiency	IGFALS	p.glu35fs	NA	ClinVar/OMIM	acid-labile subunit deficiency	0	C3900122
acid-labile subunit deficiency	IGFALS	p.ser195_arg197dup	NA	ClinVar/OMIM	acid-labile subunit deficiency	0	C3900122
brachydactyly, type c	GDF5	p.arg301ter	NA	ClinVar/OMIM	brachydactyly, type c	0	C3714899;C1861385;C1862103
chondrodysplasia, grebe type	GDF5	p.cys400tyr	NA	ClinVar/OMIM	chondrodysplasia, grebe type	0	C0265260
fibular hypoplasia and complex brachydactyly	GDF5	p.leu441pro	NA	ClinVar/OMIM	fibular hypoplasia and complex brachydactyly	0	C1856738
brachydactyly, type c	GDF5	p.met173val	NA	ClinVar/OMIM	brachydactyly, type c	0	C3714899;C1861385;C1862103
symphalangism, proximal, 1b	GDF5	p.arg438leu	NA	ClinVar/OMIM	symphalangism, proximal, 1b	0	C0039075
multiple synostoses syndrome 2	GDF5	p.ser475asn	NA	ClinVar/OMIM	multiple synostoses syndrome 2	0	C1832708;C0175700
symphalangism, proximal, 1b	GDF5	p.glu491lys	NA	ClinVar/OMIM	symphalangism, proximal, 1b	0	C0039075
brachydactyly, type c	GDF5	p.tyr487ter	NA	ClinVar/OMIM	brachydactyly, type c	0	C3714899;C1861385;C1862103
symphalangism, proximal, 1b	GDF5	p.leu373arg	NA	ClinVar/OMIM	symphalangism, proximal, 1b	0	C0039075
fibular hypoplasia and complex brachydactyly	GDF5	p.arg378gln	NA	ClinVar/OMIM	fibular hypoplasia and complex brachydactyly	0	C1856738
fibular hypoplasia and complex brachydactyly	GDF5	p.pro436thr	NA	ClinVar/OMIM	fibular hypoplasia and complex brachydactyly	0	C1856738
ehlers-danlos syndrome, classic-like, 1	TNXB	p.val706_glu707inster	NA	ClinVar/OMIM	ehlers-danlos syndrome, classic-like, 1	0	C1848029	A
persistent mullerian duct syndrome, type i	AMH	p.glu382ter	NA	ClinVar/OMIM	persistent mullerian duct syndrome, type i	0	C1849930;C3897939
persistent mullerian duct syndrome, type i	AMH	p.arg191ter	NA	ClinVar/OMIM	persistent mullerian duct syndrome, type i	0	C1849930;C3897939
persistent mullerian duct syndrome, type i	AMH	p.glu474delinsserseralater	NA	ClinVar/OMIM	persistent mullerian duct syndrome, type i	0	C1849930;C3897939
epidermolysis bullosa, junctional, herlitz type	LAMA3	p.arg2270ter	NA	ClinVar/OMIM	epidermolysis bullosa, junctional, herlitz type	0	C0079683
epidermolysis bullosa, junctional, non-herlitz type	LAMA3	p.gln2988ter	NA	ClinVar/OMIM	epidermolysis bullosa, junctional, non-herlitz type	0	C2608084;C0268374;C0014527
epiphyseal dysplasia, multiple, 1, mild	COMP	p.asn742fs	NA	ClinVar/OMIM	epiphyseal dysplasia, multiple, 1, mild	0	C4310950;C1838280;C0026760
camurati-engelmann disease	TGFB1	p.cys225arg	NA	ClinVar/OMIM	camurati-engelmann disease	0	C0011989
camurati-engelmann disease	TGFB1	p.arg218his	NA	ClinVar/OMIM	camurati-engelmann disease	0	C0011989
camurati-engelmann disease	TGFB1	p.cys223gly	NA	ClinVar/OMIM	camurati-engelmann disease	0	C0011989
camurati-engelmann disease	TGFB1	p.arg218cys	NA	ClinVar/OMIM	camurati-engelmann disease	0	C0011989
camurati-engelmann disease	TGFB1	p.tyr81his	NA	ClinVar/OMIM	camurati-engelmann disease	0	C0011989
camurati-engelmann disease	TGFB1	p.cys223arg	NA	ClinVar/OMIM	camurati-engelmann disease	0	C0011989
deafness, autosomal recessive 91 (1 family)	SERPINB6	p.glu249ter	NA	ClinVar/OMIM	deafness, autosomal recessive 91	0	C0011053;C0018772
spondyloepiphyseal dysplasia, kimberley type (1 family)	ACAN	p.gly1254fs	NA	ClinVar/OMIM	spondyloepiphyseal dysplasia, kimberley type	0	C1842149
keutel syndrome	MGP	p.ala14_val15inster	NA	ClinVar/OMIM	keutel syndrome	0	C1855607
keutel syndrome	MGP	p.tyr54ter	NA	ClinVar/OMIM	keutel syndrome	0	C1855607
heparin cofactor ii deficiency	SERPIND1	p.val108fs	NA	ClinVar/OMIM	heparin cofactor ii deficiency	0	C0398626
corticosteroid-binding globulin deficiency	SERPINA6	p.asp389asn	NA	ClinVar/OMIM	corticosteroid-binding globulin deficiency	0	C1852529
knobloch syndrome 1	COL18A1	p.gly1122fs	NA	ClinVar/OMIM	knobloch syndrome 1	0	C1849409
otospondylomegaepiphyseal dysplasia, autosomal dominant	COL11A2	p.glu834_pro843delinsala	NA	ClinVar/OMIM	otospondylomegaepiphyseal dysplasia, autosomal dominant	0	C1848488
stickler syndrome, type iv	COL9A1	p.arg295ter	NA	ClinVar/OMIM	stickler syndrome, type iv	0	C3279941
brain small vessel disease 1 without ocular anomalies	COL4A1	p.gly1236arg	NA	ClinVar/OMIM	brain small vessel disease 1 without ocular anomalies	0	C5193157
brain small vessel disease 1 without ocular anomalies	COL4A1	p.gly749ser	NA	ClinVar/OMIM	brain small vessel disease 1 without ocular anomalies	0	C5193157
brain small vessel disease 1 without ocular anomalies	COL4A1	p.gly562glu	NA	ClinVar/OMIM	brain small vessel disease 1 without ocular anomalies	0	C5193157
brain small vessel disease 1 without ocular anomalies	COL4A1	p.met1leu	NA	ClinVar/OMIM	brain small vessel disease 1 without ocular anomalies	0	C5193157
brain small vessel disease 1 without ocular anomalies	COL4A1	p.gly1130asp	NA	ClinVar/OMIM	brain small vessel disease 1 without ocular anomalies	0	C5193157
brain small vessel disease 1 without ocular anomalies	COL4A1	p.gly1423arg	NA	ClinVar/OMIM	brain small vessel disease 1 without ocular anomalies	0	C5193157
angiopathy, hereditary, with nephropathy, aneurysms, and muscle cramps	COL4A1	p.gly498val	NA	ClinVar/OMIM	angiopathy, hereditary, with nephropathy, aneurysms, and muscle cramps	0	C2673195
angiopathy, hereditary, with nephropathy, aneurysms, and muscle cramps	COL4A1	p.gly519arg	NA	ClinVar/OMIM	angiopathy, hereditary, with nephropathy, aneurysms, and muscle cramps	0	C2673195
angiopathy, hereditary, with nephropathy, aneurysms, and muscle cramps	COL4A1	p.gly528glu	NA	ClinVar/OMIM	angiopathy, hereditary, with nephropathy, aneurysms, and muscle cramps	0	C2673195
brain small vessel disease 1 with ocular anomalies	COL4A1	p.gly720asp	NA	ClinVar/OMIM	brain small vessel disease 1 with ocular anomalies	0	C5193158
brain small vessel disease 1 with ocular anomalies	COL4A1	p.gly1580arg	NA	ClinVar/OMIM	brain small vessel disease 1 with ocular anomalies	0	C5193158
ceroid lipofuscinosis, neuronal, 10	CTSD	p.tyr255ter	NA	ClinVar/OMIM	ceroid lipofuscinosis, neuronal, 10	0	C1864669
angiopathy, hereditary, with nephropathy, aneurysms, and muscle cramps	COL4A1	p.gly498arg	NA	ClinVar/OMIM	angiopathy, hereditary, with nephropathy, aneurysms, and muscle cramps	0	C2673195
angiopathy, hereditary, with nephropathy, aneurysms, and muscle cramps	COL4A1	p.gly510arg	NA	ClinVar/OMIM	angiopathy, hereditary, with nephropathy, aneurysms, and muscle cramps	0	C2673195
angiopathy, hereditary, with nephropathy, aneurysms, and muscle cramps	COL4A1	p.gly525leu	NA	ClinVar/OMIM	angiopathy, hereditary, with nephropathy, aneurysms, and muscle cramps	0	C2673195
alport syndrome	COL4A5	p.gly48arg	NA	ClinVar/OMIM	alport syndrome	0	C1567743;C1567741
alport syndrome	COL4A5	p.gly96arg	NA	ClinVar/OMIM	alport syndrome	0	C1567743;C1567741
alport syndrome	COL4A5	p.pro118_gly120del	NA	ClinVar/OMIM	alport syndrome	0	C1567743;C1567741
alport syndrome	COL4A5	p.gly129arg	NA	ClinVar/OMIM	alport syndrome	0	C1567743;C1567741
alport syndrome	COL4A5	p.gly129glu	NA	ClinVar/OMIM	alport syndrome	0	C1567743;C1567741
alport syndrome	COL4A5	p.gly129val	NA	ClinVar/OMIM	alport syndrome	0	C1567743;C1567741
alport syndrome	COL4A5	p.gly144asp	NA	ClinVar/OMIM	alport syndrome	0	C1567743;C1567741
alport syndrome	COL4A5	p.gly180arg	NA	ClinVar/OMIM	alport syndrome	0	C1567743;C1567741
alport syndrome	COL4A5	p.leu184profs	NA	ClinVar/OMIM	alport syndrome	0	C1567743;C1567741
alport syndrome	COL4A5	p.gly230asp	NA	ClinVar/OMIM	alport syndrome	0	C1567743;C1567741
alport syndrome	COL4A5	p.tyr320ter	NA	ClinVar/OMIM	alport syndrome	0	C1567743;C1567741
alport syndrome	COL4A5	p.gly362arg	NA	ClinVar/OMIM	alport syndrome	0	C1567743;C1567741
alport syndrome	COL4A5	p.gln407fs	NA	ClinVar/OMIM	alport syndrome	0	C1567743;C1567741
alport syndrome	COL4A5	p.lys408ter	NA	ClinVar/OMIM	alport syndrome	0	C1567743;C1567741
alport syndrome	COL4A5	p.gly420glu	NA	ClinVar/OMIM	alport syndrome	0	C1567743;C1567741
alport syndrome	COL4A5	p.gly475ser	NA	ClinVar/OMIM	alport syndrome	0	C1567743;C1567741
alport syndrome	COL4A5	p.gly500arg	NA	ClinVar/OMIM	alport syndrome	0	C1567743;C1567741
alport syndrome	COL4A5	p.gly533glu	NA	ClinVar/OMIM	alport syndrome	0	C1567743;C1567741
alport syndrome	COL4A5	p.gly548asp	NA	ClinVar/OMIM	alport syndrome	0	C1567743;C1567741
alport syndrome	COL4A5	p.gly564cys	NA	ClinVar/OMIM	alport syndrome	0	C1567743;C1567741
alport syndrome	COL4A5	p.gly576ser	NA	ClinVar/OMIM	alport syndrome	0	C1567743;C1567741
alport syndrome	COL4A5	p.pro619leu	NA	ClinVar/OMIM	alport syndrome	0	C1567743;C1567741
alport syndrome	COL4A5	p.gly635asp	NA	ClinVar/OMIM	alport syndrome	0	C1567743;C1567741
alport syndrome	COL4A5	p.gly719arg	NA	ClinVar/OMIM	alport syndrome	0	C1567743;C1567741
alport syndrome	COL4A5	p.gly769arg	NA	ClinVar/OMIM	alport syndrome	0	C1567743;C1567741
alport syndrome	COL4A5	p.gly772ala	NA	ClinVar/OMIM	alport syndrome	0	C1567743;C1567741
alport syndrome	COL4A5	p.lys798=	NA	ClinVar/OMIM	alport syndrome	0	C1567743;C1567741
alport syndrome	COL4A5	p.gly825ter	NA	ClinVar/OMIM	alport syndrome	0	C1567743;C1567741
alport syndrome	COL4A5	p.gly834arg	NA	ClinVar/OMIM	alport syndrome	0	C1567743;C1567741
alport syndrome	COL4A5	p.gly837ser	NA	ClinVar/OMIM	alport syndrome	0	C1567743;C1567741
alport syndrome	COL4A5	p.gly860arg	NA	ClinVar/OMIM	alport syndrome	0	C1567743;C1567741
alport syndrome	COL4A5	p.gly887arg	NA	ClinVar/OMIM	alport syndrome	0	C1567743;C1567741
alport syndrome	COL4A5	p.gly908arg	NA	ClinVar/OMIM	alport syndrome	0	C1567743;C1567741
alport syndrome	COL4A5	p.gly911arg	NA	ClinVar/OMIM	alport syndrome	0	C1567743;C1567741
alport syndrome	COL4A5	p.gln928ter	NA	ClinVar/OMIM	alport syndrome	0	C1567743;C1567741
alport syndrome	COL4A5	p.gly1000val	NA	ClinVar/OMIM	alport syndrome	0	C1567743;C1567741
alport syndrome	COL4A5	p.gly1069val	NA	ClinVar/OMIM	alport syndrome	0	C1567743;C1567741
alport syndrome	COL4A5	p.gly1158trp	NA	ClinVar/OMIM	alport syndrome	0	C1567743;C1567741
alport syndrome	COL4A5	p.gly1196glu	NA	ClinVar/OMIM	alport syndrome	0	C1567743;C1567741
alport syndrome	COL4A5	p.gly1205ser	NA	ClinVar/OMIM	alport syndrome	0	C1567743;C1567741
alport syndrome	COL4A5	p.gln1234ter	NA	ClinVar/OMIM	alport syndrome	0	C1567743;C1567741
alport syndrome	COL4A5	p.gly1241val	NA	ClinVar/OMIM	alport syndrome	0	C1567743;C1567741
alport syndrome	COL4A5	p.gln1308his	NA	ClinVar/OMIM	alport syndrome	0	C1567743;C1567741
alport syndrome	COL4A5	p.gly1336ter	NA	ClinVar/OMIM	alport syndrome	0	C1567743;C1567741
alport syndrome	COL4A5	p.gly1357ser	NA	ClinVar/OMIM	alport syndrome	0	C1567743;C1567741
alport syndrome	COL4A5	p.gln1383ter	NA	ClinVar/OMIM	alport syndrome	0	C1567743;C1567741
alport syndrome	COL4A5	p.gly1388fs	NA	ClinVar/OMIM	alport syndrome	0	C1567743;C1567741
alport syndrome	COL4A5	p.gly1391ter	NA	ClinVar/OMIM	alport syndrome	0	C1567743;C1567741
alport syndrome	COL4A5	p.gln1393fs	NA	ClinVar/OMIM	alport syndrome	0	C1567743;C1567741
alport syndrome	COL4A5	p.gly1421trp	NA	ClinVar/OMIM	alport syndrome	0	C1567743;C1567741
alport syndrome	COL4A5	p.gly1427val	NA	ClinVar/OMIM	alport syndrome	0	C1567743;C1567741
alport syndrome	COL4A5	p.gly1442ala	NA	ClinVar/OMIM	alport syndrome	0	C1567743;C1567741
alport syndrome	COL4A5	p.gly1442asp	NA	ClinVar/OMIM	alport syndrome	0	C1567743;C1567741
alport syndrome	COL4A5	p.gln1501ter	NA	ClinVar/OMIM	alport syndrome	0	C1567743;C1567741
alport syndrome	COL4A5	p.cys1564arg	NA	ClinVar/OMIM	alport syndrome	0	C1567743;C1567741
alport syndrome	COL4A5	p.glu1568lys	NA	ClinVar/OMIM	alport syndrome	0	C1567743;C1567741
alport syndrome	COL4A5	p.pro1584leu	NA	ClinVar/OMIM	alport syndrome	0	C1567743;C1567741
alport syndrome	COL4A5	p.cys1632gly	NA	ClinVar/OMIM	alport syndrome	0	C1567743;C1567741
alport syndrome	COL4A5	p.arg1677pro	NA	ClinVar/OMIM	alport syndrome	0	C1567743;C1567741
alport syndrome	COL4A5	p.cys1681phe	NA	ClinVar/OMIM	alport syndrome	0	C1567743;C1567741
orofacial cleft 11	BMP4	p.arg198ter	NA	ClinVar/OMIM	orofacial cleft 11	0	C2677434;C1864689;C0158646
fibrochondrogenesis	COL11A1	p.ala608fs	NA	ClinVar/OMIM	fibrochondrogenesis	0	C0265282
fibrochondrogenesis	COL11A1	p.gly1093arg	NA	ClinVar/OMIM	fibrochondrogenesis	0	C0265282
fibrochondrogenesis	COL11A1	p.gly796arg	NA	ClinVar/OMIM	fibrochondrogenesis	0	C0265282
nephrotic syndrome, type 5, with ocular abnormalities	LAMB2	p.his147arg	NA	ClinVar/OMIM	nephrotic syndrome, type 5, with ocular abnormalities	0	C1836876;C3280113;C4016240
robinow syndrome, autosomal dominant 1	WNT5A	p.cys182arg	NA	ClinVar/OMIM	robinow syndrome, autosomal dominant 1	0	C0265205
robinow syndrome, autosomal dominant 1	WNT5A	p.cys83ser	NA	ClinVar/OMIM	robinow syndrome, autosomal dominant 1	0	C0265205
peeling skin syndrome 4	CSTA	p.gln86ter	NA	ClinVar/OMIM	peeling skin syndrome 4	0	C4225407
megalocornea	CHRDL1	p.cys261phe	NA	ClinVar/OMIM	megalocornea	0	C0344530
megalocornea	CHRDL1	p.arg218ter	NA	ClinVar/OMIM	megalocornea	0	C0344530
osteogenesis imperfecta, type x	SERPINH1	p.leu78pro	NA	ClinVar/OMIM	osteogenesis imperfecta, type x	0	C3151211;C0029434
microphthalmia, isolated, with coloboma 6	GDF6	p.ala199thr	NA	ClinVar/OMIM	microphthalmia, isolated, with coloboma 6	0	C3150968
cortical malformations, occipital	LAMC3	p.gln386ter	NA	ClinVar/OMIM	cortical malformations, occipital	0	C3279875;C3279878
reclassified - variant of unknown significance	ADAMTS18	p.ser179leu	NA	ClinVar/OMIM	reclassified - variant of unknown significance	0	C4015968;C0265970;C1867981
microphthalmia and limb anomalies	SMOC1	p.gln240ter	NA	ClinVar/OMIM	microphthalmia and limb anomalies	0	C0599973
diaphanospondylodysostosis	BMPER	p.pro370leu	NA	ClinVar/OMIM	diaphanospondylodysostosis	0	C1842691
diaphanospondylodysostosis	BMPER	p.cys546ter	NA	ClinVar/OMIM	diaphanospondylodysostosis	0	C1842691
barrett esophagus/esophageal adenocarcinoma	CTHRC1	p.gln44pro	NA	ClinVar/OMIM	barrett esophagus/esophageal adenocarcinoma	0	C3277074	C
raine syndrome	FAM20C	p.ile246asn	NA	ClinVar/OMIM	raine syndrome	0	C1850106
raine syndrome	FAM20C	p.gly266arg	NA	ClinVar/OMIM	raine syndrome	0	C1850106
geleophysic dysplasia 1	ADAMTSL2	p.arg72gln	NA	ClinVar/OMIM	geleophysic dysplasia 1	0	C3278147
geleophysic dysplasia 1	ADAMTSL2	p.arg221cys	NA	ClinVar/OMIM	geleophysic dysplasia 1	0	C3278147
myopathy, areflexia, respiratory distress, and dysphagia, early-onset	MEGF10	p.cys774arg	NA	ClinVar/OMIM	myopathy, areflexia, respiratory distress, and dysphagia, early-onset	0	C3280679
myopathy, areflexia, respiratory distress, and dysphagia, early-onset, mild variant	MEGF10	p.cys326arg	NA	ClinVar/OMIM	myopathy, areflexia, respiratory distress, and dysphagia, early-onset, mild variant	0	C0026848
myopathy, areflexia, respiratory distress, and dysphagia, early-onset, mild variant	MEGF10	p.arg71trp	NA	ClinVar/OMIM	myopathy, areflexia, respiratory distress, and dysphagia, early-onset, mild variant	0	C0026848
aml - acute myeloid leukemia	TGM6	p.leu517trp	NA	ClinVar/OMIM	aml - acute myeloid leukemia	0	C0023467
microspherophakia and/or megalocornea, with ectopia lentis and with or without secondary glaucoma	LTBP2	p.gln1619ter	NA	ClinVar/OMIM	microspherophakia and/or megalocornea, with ectopia lentis and with or without secondary glaucoma	0	C1562061	C
microspherophakia and/or megalocornea, with ectopia lentis and with or without secondary glaucoma	LTBP2	p.cys1438tyr	NA	ClinVar/OMIM	microspherophakia and/or megalocornea, with ectopia lentis and with or without secondary glaucoma	0	C1562061	C
osteogenesis imperfecta, type vi	SERPINF1	p.tyr232ter	NA	ClinVar/OMIM	osteogenesis imperfecta, type vi	0	C3279564;C0029434
osteogenesis imperfecta, type vi	SERPINF1	p.gln378ter	NA	ClinVar/OMIM	osteogenesis imperfecta, type vi	0	C3279564;C0029434
loeys-dietz syndrome 4	TGFB2	p.pro338his	NA	ClinVar/OMIM	loeys-dietz syndrome 4	0	C3553762
loeys-dietz syndrome 4	TGFB2	p.ala100_tyr104del	NA	ClinVar/OMIM	loeys-dietz syndrome 4	0	C3553762
loeys-dietz syndrome 4	TGFB2	p.cys229ter	NA	ClinVar/OMIM	loeys-dietz syndrome 4	0	C3553762
alport syndrome	COL4A5	p.gly144arg	NA	ClinVar/OMIM	alport syndrome	0	C1567743;C1567741
alport syndrome	COL4A5	p.phe222cys	NA	ClinVar/OMIM	alport syndrome	0	C1567743;C1567741
alport syndrome	COL4A5	p.glu228ter	NA	ClinVar/OMIM	alport syndrome	0	C1567743;C1567741
alport syndrome	COL4A5	p.gln379ter	NA	ClinVar/OMIM	alport syndrome	0	C1567743;C1567741
alport syndrome	COL4A5	p.gly406ser	NA	ClinVar/OMIM	alport syndrome	0	C1567743;C1567741
alport syndrome	COL4A5	p.gly530asp	NA	ClinVar/OMIM	alport syndrome	0	C1567743;C1567741
alport syndrome	COL4A5	p.gly582arg	NA	ClinVar/OMIM	alport syndrome	0	C1567743;C1567741
alport syndrome	COL4A5	p.gly612asp	NA	ClinVar/OMIM	alport syndrome	0	C1567743;C1567741
alport syndrome	COL4A5	p.pro628leu	NA	ClinVar/OMIM	alport syndrome	0	C1567743;C1567741
alport syndrome	COL4A5	p.gly672arg	NA	ClinVar/OMIM	alport syndrome	0	C1567743;C1567741
alport syndrome	COL4A5	p.gly722arg	NA	ClinVar/OMIM	alport syndrome	0	C1567743;C1567741
alport syndrome	COL4A5	p.gly828glu	NA	ClinVar/OMIM	alport syndrome	0	C1567743;C1567741
alport syndrome	COL4A5	p.gly875arg	NA	ClinVar/OMIM	alport syndrome	0	C1567743;C1567741
alport syndrome	COL4A5	p.gly893val	NA	ClinVar/OMIM	alport syndrome	0	C1567743;C1567741
alport syndrome	COL4A5	p.gly899val	NA	ClinVar/OMIM	alport syndrome	0	C1567743;C1567741
alport syndrome	COL4A5	p.gly1424glu	NA	ClinVar/OMIM	alport syndrome	0	C1567743;C1567741
alport syndrome	COL4A5	p.gly1427ala	NA	ClinVar/OMIM	alport syndrome	0	C1567743;C1567741
alport syndrome	COL4A5	p.gly1433val	NA	ClinVar/OMIM	alport syndrome	0	C1567743;C1567741
alport syndrome	COL4A5	p.thr1480arg	NA	ClinVar/OMIM	alport syndrome	0	C1567743;C1567741
alport syndrome	COL4A5	p.arg1677leu	NA	ClinVar/OMIM	alport syndrome	0	C1567743;C1567741
diaphyseal dysplasia	TGFB1	p.arg156cys	NA	ClinVar/OMIM	diaphyseal dysplasia	0	C0011989
diaphyseal dysplasia	TGFB1	p.glu169lys	NA	ClinVar/OMIM	diaphyseal dysplasia	0	C0011989
diaphyseal dysplasia	TGFB1	p.his222asp	NA	ClinVar/OMIM	diaphyseal dysplasia	0	C0011989
diaphyseal dysplasia	TGFB1	p.cys223ser	NA	ClinVar/OMIM	diaphyseal dysplasia	0	C0011989
col4a1-related disorders	COL4A1	p.gly590glu	NA	ClinVar/OMIM	col4a1-related disorders	0	C1413582
brachydactyly, type a1, c	GDF5	p.arg399cys	NA	ClinVar/OMIM	brachydactyly, type a1, c	0	C1862151;C3554446
ichthyosis, congenital, autosomal recessive 1	TGM1	p.asp102val	NA	ClinVar/OMIM	ichthyosis, congenital, autosomal recessive 1	0	C0079154;C0020758
ichthyosis, congenital, autosomal recessive 1, with bathing suit distribution	TGM1	p.tyr276asn	NA	ClinVar/OMIM	ichthyosis, congenital, autosomal recessive 1, with bathing suit distribution	0	C0020758
ichthyosis, congenital, autosomal recessive 1	TGM1	p.arg445fs	NA	ClinVar/OMIM	ichthyosis, congenital, autosomal recessive 1	0	C0079154;C0020758
ectopia lentis 2, isolated, autosomal recessive	ADAMTSL4	p.arg276fs	NA	ClinVar/OMIM	ectopia lentis 2, isolated, autosomal recessive	0	C3541474
ectopia lentis 2, isolated, autosomal recessive	ADAMTSL4	p.arg670ter	NA	ClinVar/OMIM	ectopia lentis 2, isolated, autosomal recessive	0	C3541474
ectopia lentis 2, isolated, autosomal recessive	ADAMTSL4	p.pro80fs	NA	ClinVar/OMIM	ectopia lentis 2, isolated, autosomal recessive	0	C3541474
variant of unknown significance	COL14A1	p.pro1502leu	NA	ClinVar/OMIM	variant of unknown significance	0	C2986382
carpenter syndrome 2	MEGF8	p.arg448ter	NA	ClinVar/OMIM	carpenter syndrome 2	0	C3554247;C1275078
hemorrhage, intracerebral, susceptibility to	COL4A1	p.arg538gly	NA	ClinVar/OMIM	hemorrhage, intracerebral, susceptibility to	0	C3281105
cutis laxa, autosomal recessive, type ic	LTBP4	p.tyr1373fs	NA	ClinVar/OMIM	cutis laxa, autosomal recessive, type ic	0	C0268351;C2750804
ulna and fibula, absence of, with severe limb deficiency	WNT7A	p.arg222trp	NA	ClinVar/OMIM	ulna and fibula, absence of, with severe limb deficiency	0	C1848651
ulna and fibula, absence of, with severe limb deficiency	WNT7A	p.glu72lys	NA	ClinVar/OMIM	ulna and fibula, absence of, with severe limb deficiency	0	C1848651
brachydactyly, type a2	GDF5	p.arg380gln	NA	ClinVar/OMIM	brachydactyly, type a2	0	C1832702
osteogenesis imperfecta, type xv	WNT1	p.his287fs	NA	ClinVar/OMIM	osteogenesis imperfecta, type xv	0	C0029434
hypogonadotropic hypogonadism 20 with anosmia, susceptibility to	FGF17	p.ile108thr	NA	ClinVar/OMIM	hypogonadotropic hypogonadism 20 with anosmia, susceptibility to	0	C4016854
hypogonadotropic hypogonadism 20 with anosmia	FGF17	p.asn187ser	NA	ClinVar/OMIM	hypogonadotropic hypogonadism 20 with anosmia	0	C4016856
osteoporosis, early-onset, susceptibility to	WNT1	p.cys218gly	NA	ClinVar/OMIM	osteoporosis, early-onset, susceptibility to	0	C0029456	C
ceroid lipofuscinosis, neuronal, 13	CTSF	p.gly458ala	NA	ClinVar/OMIM	ceroid lipofuscinosis, neuronal, 13	0	C0027877
ceroid lipofuscinosis, neuronal, 13	CTSF	p.ser480leu	NA	ClinVar/OMIM	ceroid lipofuscinosis, neuronal, 13	0	C0027877
urofacial syndrome 1	HPSE2	p.asn543ile	NA	ClinVar/OMIM	urofacial syndrome 1	0	C0403555
right atrial isomerism	GDF1	p.val304fs	NA	ClinVar/OMIM	right atrial isomerism	0	C3178806
winchester syndrome (1 family)	MMP14	p.thr17arg	NA	ClinVar/OMIM	winchester syndrome	0	C0432289
corneal dystrophy, congenital stromal	DCN	p.gly316fs	NA	ClinVar/OMIM	corneal dystrophy, congenital stromal	0	C1864738
holoprosencephaly	SHH	p.leu4fs	NA	ClinVar/OMIM	holoprosencephaly	0	C1835819;C0079541
holoprosencephaly	SHH	p.gln100his	NA	ClinVar/OMIM	holoprosencephaly	0	C1835819;C0079541
holoprosencephaly	SHH	p.tyr158ter	NA	ClinVar/OMIM	holoprosencephaly	0	C1835819;C0079541
holoprosencephaly	SHH	p.glu188gln	NA	ClinVar/OMIM	holoprosencephaly	0	C1835819;C0079541
holoprosencephaly	SHH	p.ser195=	NA	ClinVar/OMIM	holoprosencephaly	0	C1835819;C0079541
holoprosencephaly	SHH	p.gln209ter	NA	ClinVar/OMIM	holoprosencephaly	0	C1835819;C0079541
holoprosencephaly	SHH	p.asp222asn	NA	ClinVar/OMIM	holoprosencephaly	0	C1835819;C0079541
holoprosencephaly	SHH	p.ser236arg	NA	ClinVar/OMIM	holoprosencephaly	0	C1835819;C0079541
microcornea, myopic chorioretinal atrophy, and telecanthus	ADAMTS18	p.cys577trp	NA	ClinVar/OMIM	microcornea, myopic chorioretinal atrophy, and telecanthus	0	C0266544
microcornea, myopic chorioretinal atrophy, and telecanthus	ADAMTS18	p.glu689ter	NA	ClinVar/OMIM	microcornea, myopic chorioretinal atrophy, and telecanthus	0	C0266544
microcornea, myopic chorioretinal atrophy, and telecanthus	ADAMTS18	p.leu202pro	NA	ClinVar/OMIM	microcornea, myopic chorioretinal atrophy, and telecanthus	0	C0266544
microcornea, myopic chorioretinal atrophy, and telecanthus	ADAMTS18	p.gln33ter	NA	ClinVar/OMIM	microcornea, myopic chorioretinal atrophy, and telecanthus	0	C0266544
variant of unknown significance	NID1	p.gln388ter	NA	ClinVar/OMIM	variant of unknown significance	0	C2986382
variant of unknown significance	LAMC1	p.thr746met	NA	ClinVar/OMIM	variant of unknown significance	0	C2986382
metacarpal 4-5 fusion	FGF16	p.arg179ter	NA	ClinVar/OMIM	metacarpal 4-5 fusion	0	C1839728
metacarpal 4-5 fusion	FGF16	p.ser157ter	NA	ClinVar/OMIM	metacarpal 4-5 fusion	0	C1839728
methylmalonic acidemia and homocysteinemia, cblx type	HCFC1	p.ala115val	NA	ClinVar/OMIM	methylmalonic acidemia and homocysteinemia, cblx type	0	C0796208
methylmalonic acidemia and homocysteinemia, cblx type	HCFC1	p.ala73thr	NA	ClinVar/OMIM	methylmalonic acidemia and homocysteinemia, cblx type	0	C0796208
basal ganglia calcification, idiopathic, 5	PDGFB	p.gln145ter	NA	ClinVar/OMIM	basal ganglia calcification, idiopathic, 5	0	C3809645	C
basal ganglia calcification, idiopathic, 5	PDGFB	p.leu119pro	NA	ClinVar/OMIM	basal ganglia calcification, idiopathic, 5	0	C3809645	C
basal ganglia calcification, idiopathic, 5	PDGFB	p.arg149ter	NA	ClinVar/OMIM	basal ganglia calcification, idiopathic, 5	0	C3809645	C
basal ganglia calcification, idiopathic, 5	PDGFB	p.met1ile	NA	ClinVar/OMIM	basal ganglia calcification, idiopathic, 5	0	C3809645	C
nonsyndromic hearing loss, recessive	TECTA	p.glu2035lys	NA	ClinVar/OMIM	nonsyndromic hearing loss, recessive	0	C3711374	C
telangiectasia, hereditary hemorrhagic, type 5	GDF2	p.pro85leu	NA	ClinVar/OMIM	telangiectasia, hereditary hemorrhagic, type 5	0	C0039445
telangiectasia, hereditary hemorrhagic, type 5	GDF2	p.arg68leu	NA	ClinVar/OMIM	telangiectasia, hereditary hemorrhagic, type 5	0	C0039445
telangiectasia, hereditary hemorrhagic, type 5	GDF2	p.arg333trp	NA	ClinVar/OMIM	telangiectasia, hereditary hemorrhagic, type 5	0	C0039445
reticulate acropigmentation of kitamura	ADAM10	p.pro139ser	NA	ClinVar/OMIM	reticulate acropigmentation of kitamura	0	C3714534;C0406811
reticulate acropigmentation of kitamura	ADAM10	p.ser504asn	NA	ClinVar/OMIM	reticulate acropigmentation of kitamura	0	C3714534;C0406811
reticulate acropigmentation of kitamura	ADAM10	p.tyr143ter	NA	ClinVar/OMIM	reticulate acropigmentation of kitamura	0	C3714534;C0406811
reticulate acropigmentation of kitamura	ADAM10	p.thr422fs	NA	ClinVar/OMIM	reticulate acropigmentation of kitamura	0	C3714534;C0406811
reticulate acropigmentation of kitamura	ADAM10	p.cys524tyr	NA	ClinVar/OMIM	reticulate acropigmentation of kitamura	0	C3714534;C0406811
alzheimer disease 18, susceptibility to	ADAM10	p.arg181gly	NA	ClinVar/OMIM	alzheimer disease 18, susceptibility to	0	C4016772	C
von willebrand disorder	VWF	p.pro1266gln	NA	ClinVar/OMIM	von willebrand disorder	0	C0042974	A
von willebrand disorder	VWF	p.ile1309val	NA	ClinVar/OMIM	von willebrand disorder	0	C0042974	A
von willebrand disorder	VWF	p.arg1379cys	NA	ClinVar/OMIM	von willebrand disorder	0	C0042974	A
von willebrand disorder	VWF	p.pro2145ser	NA	ClinVar/OMIM	von willebrand disorder	0	C0042974	A
combined deficiency of sialidase and beta galactosidase	CTSA	p.pro95fs	NA	ClinVar/OMIM	combined deficiency of sialidase and beta galactosidase	0	C0268233
deafness, x-linked 6 (1 family)	COL4A6	p.gly590ser	NA	ClinVar/OMIM	deafness, x-linked 6	0	C0011053;C0018772
corneal dystrophy, congenital stromal	DCN	p.lys321fs	NA	ClinVar/OMIM	corneal dystrophy, congenital stromal	0	C1864738
congenital disorder of deglycosylation	NGLY1	p.arg360del	NA	ClinVar/OMIM	congenital disorder of deglycosylation	0	C3808991
tooth agenesis, selective, x-linked, 1	EDA	p.ser319ile	NA	ClinVar/OMIM	tooth agenesis, selective, x-linked, 1	0	C1970757;C0020608
variant of unknown significance	SPOCK1	p.asp80val	NA	ClinVar/OMIM	variant of unknown significance	0	C2986382
insulin-like growth factor i deficiency	IGF1	p.arg98trp	NA	ClinVar/OMIM	insulin-like growth factor i deficiency	0	C1837475;C0151686
hereditary pancreatitis	PRSS1	p.cys139ser	NA	ClinVar/OMIM	hereditary pancreatitis	0	C0030305;C0238339
brain small vessel disease 1 without ocular anomalies	COL4A1	p.gly1326arg	NA	ClinVar/OMIM	brain small vessel disease 1 without ocular anomalies	0	C5193157
plasma triglyceride level quantitative trait locus, low	ANGPTL4	p.lys217ter	NA	ClinVar/OMIM	plasma triglyceride level quantitative trait locus, low	0	C4016952
isolated hypogonadotropic hypogonadism	FGF8	p.gly151ser	NA	ClinVar/OMIM	isolated hypogonadotropic hypogonadism	0	C3489396
isolated hypogonadotropic hypogonadism	FGF8	p.leu79=	NA	ClinVar/OMIM	isolated hypogonadotropic hypogonadism	0	C3489396
isolated hypogonadotropic hypogonadism	KAL1	p.met1val	NA	ClinVar/OMIM	isolated hypogonadotropic hypogonadism	0	C3489396
lymphatic malformation 4	VEGFC	p.arg210ter	NA	ClinVar/OMIM	lymphatic malformation 4	0	C4747769
anterior segment dysgenesis 7	PXDN	p.arg880cys	NA	ClinVar/OMIM	anterior segment dysgenesis 7	0	C3151617
anterior segment dysgenesis 7	PXDN	p.arg341ter	NA	ClinVar/OMIM	anterior segment dysgenesis 7	0	C3151617
trichomegaly	FGF5	p.met54fs	NA	ClinVar/OMIM	trichomegaly	0	C0854699
trichomegaly	FGF5	p.tyr174his	NA	ClinVar/OMIM	trichomegaly	0	C0854699
fibrinogen philadelphia	FGG	p.ser404pro	NA	ClinVar/OMIM	fibrinogen philadelphia	0	C0314561
robinow syndrome	WNT5A	p.thr135=	NA	ClinVar/OMIM	robinow syndrome	0	C0265205
robinow syndrome, autosomal dominant 1	WNT5A	p.gly163arg	NA	ClinVar/OMIM	robinow syndrome, autosomal dominant 1	0	C0265205
brain small vessel disease 1 without ocular anomalies	COL4A1	p.gly696fs	NA	ClinVar/OMIM	brain small vessel disease 1 without ocular anomalies	0	C5193157
stickler syndrome, type iv	COL9A1	p.arg507ter	NA	ClinVar/OMIM	stickler syndrome, type iv	0	C3279941
malignant tumor of prostate	SERPINB4	p.ile159asn	NA	ClinVar/OMIM	malignant tumor of prostate	0	C0376358;C0034341	C
malignant tumor of prostate	GDF10	p.ala406val	NA	ClinVar/OMIM	malignant tumor of prostate	0	C0376358;C0034341	C
malignant tumor of prostate	LAMA5	p.arg827cys	NA	ClinVar/OMIM	malignant tumor of prostate	0	C0376358;C0034341	C
malignant tumor of prostate	NELL1	p.gly584ter	NA	ClinVar/OMIM	malignant tumor of prostate	0	C0376358;C0034341	C
malignant tumor of prostate	THBS3	p.gln480his	NA	ClinVar/OMIM	malignant tumor of prostate	0	C0376358;C0034341	C
malignant tumor of prostate	SCUBE3	p.pro821leu	NA	ClinVar/OMIM	malignant tumor of prostate	0	C0376358;C0034341	C
variant of unknown significance	SFTPA1	p.gln238lys	NA	ClinVar/OMIM	variant of unknown significance	0	C2986382
leptin dysfunction	LEP	p.asp100tyr	NA	ClinVar/OMIM	leptin dysfunction	0	C4016279
robinow syndrome, autosomal dominant 1	WNT5A	p.tyr86cys	NA	ClinVar/OMIM	robinow syndrome, autosomal dominant 1	0	C0265205
robinow syndrome, autosomal dominant 1	WNT5A	p.cys69tyr	NA	ClinVar/OMIM	robinow syndrome, autosomal dominant 1	0	C0265205
amelogenesis imperfecta, type ia	LAMB3	p.glu1132fs	NA	ClinVar/OMIM	amelogenesis imperfecta, type ia	0	C0002452
variant of unknown significance	LOXL3	p.cys676tyr	NA	ClinVar/OMIM	variant of unknown significance	0	C2986382
hirschsprung disease 1	THBS4	p.gln538ter	NA	ClinVar/OMIM	hirschsprung disease 1	0	C0019569;C2931876;C3888239
hirschsprung disease 1	NTF3	p.gly89arg	NA	ClinVar/OMIM	hirschsprung disease 1	0	C0019569;C2931876;C3888239
non-immune hydrops fetalis	CTSA	p.leu217fs	NA	ClinVar/OMIM	non-immune hydrops fetalis	0	C0455988
larsen syndrome, autosomal recessive	COL11A2	p.arg429gln	NA	ClinVar/OMIM	larsen syndrome, autosomal recessive	0	C2931649;C1837657
glomerulopathy with fibronectin deposits 2	FN1	p.trp1925cys	NA	ClinVar/OMIM	glomerulopathy with fibronectin deposits 2	0	C1866075
glomerulopathy with fibronectin deposits 2	FN1	p.leu1974pro	NA	ClinVar/OMIM	glomerulopathy with fibronectin deposits 2	0	C1866075
glomerulopathy with fibronectin deposits 2	FN1	p.pro1472del	NA	ClinVar/OMIM	glomerulopathy with fibronectin deposits 2	0	C1866075
variant of unknown significance	A2ML1	p.arg802leu	NA	ClinVar/OMIM	variant of unknown significance	0	C2986382
bethlem myopathy 2	COL12A1	p.gly2786asp	NA	ClinVar/OMIM	bethlem myopathy 2	0	C4225313
dental anomalies and short stature	LTBP3	p.gln141ter	NA	ClinVar/OMIM	dental anomalies and short stature	0	C1832594
dental anomalies and short stature	LTBP3	p.gly739fs	NA	ClinVar/OMIM	dental anomalies and short stature	0	C1832594
dental anomalies and short stature	LTBP3	p.val786fs	NA	ClinVar/OMIM	dental anomalies and short stature	0	C1832594
long qt syndrome	SDC1	p.ser63phe	NA	ClinVar/OMIM	long qt syndrome	0	C2678484;C0023976
epilepsy, lateral temporal lobe, autosomal dominant	LGI1	p.phe338ser	NA	ClinVar/OMIM	epilepsy, lateral temporal lobe, autosomal dominant	0	C1838062
dyssegmental dysplasia	HSPG2	p.tyr1411=	NA	ClinVar/OMIM	dyssegmental dysplasia	0	C1857100
childhood onset schizophrenia	PLXNA3	p.arg616gln	NA	ClinVar/OMIM	childhood onset schizophrenia	0	C0036346	B
peeling skin syndrome 4	CSTA	p.lys22ter	NA	ClinVar/OMIM	peeling skin syndrome 4	0	C4225407
epilepsy, lateral temporal lobe, autosomal dominant	LGI1	p.cys42arg	NA	ClinVar/OMIM	epilepsy, lateral temporal lobe, autosomal dominant	0	C1838062
epilepsy, lateral temporal lobe, autosomal dominant	LGI1	p.cys42gly	NA	ClinVar/OMIM	epilepsy, lateral temporal lobe, autosomal dominant	0	C1838062
epilepsy, lateral temporal lobe, autosomal dominant	LGI1	p.ala253fs	NA	ClinVar/OMIM	epilepsy, lateral temporal lobe, autosomal dominant	0	C1838062
epilepsy, lateral temporal lobe, autosomal dominant	LGI1	p.arg474ter	NA	ClinVar/OMIM	epilepsy, lateral temporal lobe, autosomal dominant	0	C1838062
epilepsy, lateral temporal lobe, autosomal dominant	LGI1	p.ser473leu	NA	ClinVar/OMIM	epilepsy, lateral temporal lobe, autosomal dominant	0	C1838062
inborn genetic diseases	COL4A1	p.gly832arg	NA	ClinVar/OMIM	inborn genetic diseases	0	C0950123
inborn genetic diseases	SLIT2	p.asp1407gly	NA	ClinVar/OMIM	inborn genetic diseases	0	C0950123
inborn genetic diseases	FN1	p.trp1017cys	NA	ClinVar/OMIM	inborn genetic diseases	0	C0950123
hereditary disease	NTF4	p.gln174arg	NA	ClinVar/OMIM	hereditary disease	0	C0019247
ceroid lipofuscinosis, neuronal, 10	CTSD	p.gly149val	NA	ClinVar/OMIM	ceroid lipofuscinosis, neuronal, 10	0	C1864669
ceroid lipofuscinosis, neuronal, 10	CTSD	p.arg399his	NA	ClinVar/OMIM	ceroid lipofuscinosis, neuronal, 10	0	C1864669
malformation of cortical development	ADAM19	p.pro855ser	NA	ClinVar/OMIM	malformation of cortical development	0	C1955869
malformation of cortical development	MUC16	p.ala8727val	NA	ClinVar/OMIM	malformation of cortical development	0	C1955869
malformation of cortical development	MUC16	p.ser3434pro	NA	ClinVar/OMIM	malformation of cortical development	0	C1955869
malformation of cortical development	MUC16	p.pro8789leu	NA	ClinVar/OMIM	malformation of cortical development	0	C1955869
malformation of cortical development	MUC16	p.ser834_pro835inster	NA	ClinVar/OMIM	malformation of cortical development	0	C1955869
familial porencephaly	COL4A1	p.gly888arg	NA	ClinVar/OMIM	familial porencephaly	0	C1867983
otitis media, susceptibility to	A2ML1	p.ser829fs	NA	ClinVar/OMIM	otitis media, susceptibility to	0	C0029882
nonsyndromic otitis media	A2ML1	p.gln255ter	NA	ClinVar/OMIM	nonsyndromic otitis media	0	0
nonsyndromic otitis media	A2ML1	p.pro356arg	NA	ClinVar/OMIM	nonsyndromic otitis media	0	0
nonsyndromic otitis media	A2ML1	p.ala810thr	NA	ClinVar/OMIM	nonsyndromic otitis media	0	0
nonsyndromic otitis media	A2ML1	p.glu972ter	NA	ClinVar/OMIM	nonsyndromic otitis media	0	0
nonsyndromic otitis media	A2ML1	p.arg1001trp	NA	ClinVar/OMIM	nonsyndromic otitis media	0	0
nonsyndromic otitis media	A2ML1	p.ala1431val	NA	ClinVar/OMIM	nonsyndromic otitis media	0	0
prostate cancer	SERPINB13	p.ala298val	NA	ClinVar/OMIM	prostate cancer	0	C0376358;C0034341	C
prostate cancer	EMILIN1	p.arg66gln	NA	ClinVar/OMIM	prostate cancer	0	C0376358;C0034341	C
progressive sensorineural hearing impairment	SEMA3D	p.pro580ser	NA	ClinVar/OMIM	progressive sensorineural hearing impairment	0	C1843156
loeys-dietz syndrome 4	TGFB2	p.tyr341fs	NA	ClinVar/OMIM	loeys-dietz syndrome 4	0	C3553762
inborn genetic diseases	ACAN	p.thr985ala	NA	ClinVar/OMIM	inborn genetic diseases	0	C0950123
erythrocytosis, familial, 3	EGLN1	p.ala107ser	NA	ClinVar/OMIM	erythrocytosis, familial, 3	0	C1853286
peeling skin syndrome 5	SERPINB8	p.met1thr	NA	ClinVar/OMIM	peeling skin syndrome 5	0	C4310710
ovarian dysgenesis	BMP15	p.leu263dup	NA	ClinVar/OMIM	ovarian dysgenesis	0	C0342510
meester-loeys syndrome	BGN	p.trp2ter	NA	ClinVar/OMIM	meester-loeys syndrome	0	C4310811
meester-loeys syndrome	BGN	p.gln303pro	NA	ClinVar/OMIM	meester-loeys syndrome	0	C4310811
meester-loeys syndrome	BGN	p.gly80ser	NA	ClinVar/OMIM	meester-loeys syndrome	0	C4310811
acute aortic dissections	LOX	p.trp42ter	NA	ClinVar/OMIM	acute aortic dissections	0	C0241868
lethal congenital contracture syndrome 11	GLDN	p.ala475pro	NA	ClinVar/OMIM	lethal congenital contracture syndrome 11	0	C4310670
lethal congenital contracture syndrome 11	GLDN	p.arg414ter	NA	ClinVar/OMIM	lethal congenital contracture syndrome 11	0	C4310670
lissencephaly 2	RELN	p.asp1452asn	NA	ClinVar/OMIM	lissencephaly 2	0	C0796089	B
ectopia lentis	ADAMTSL4	p.ser177=	NA	ClinVar/OMIM	ectopia lentis	0	C0024796;C0013581
ectopia lentis	ADAMTSL4	p.ala337thr	NA	ClinVar/OMIM	ectopia lentis	0	C0024796;C0013581
ectopia lentis	ADAMTSL4	p.ala377=	NA	ClinVar/OMIM	ectopia lentis	0	C0024796;C0013581
ectopia lentis	ADAMTSL4	p.arg387gly	NA	ClinVar/OMIM	ectopia lentis	0	C0024796;C0013581
ectopia lentis	ADAMTSL4	p.ser488=	NA	ClinVar/OMIM	ectopia lentis	0	C0024796;C0013581
ectopia lentis	ADAMTSL4	p.arg519trp	NA	ClinVar/OMIM	ectopia lentis	0	C0024796;C0013581
ectopia lentis	ADAMTSL4	p.gly592=	NA	ClinVar/OMIM	ectopia lentis	0	C0024796;C0013581
ectopia lentis	ADAMTSL4	p.val593ile	NA	ClinVar/OMIM	ectopia lentis	0	C0024796;C0013581
ectopia lentis	ADAMTSL4	p.pro620=	NA	ClinVar/OMIM	ectopia lentis	0	C0024796;C0013581
ectopia lentis	ADAMTSL4	p.gly662glu	NA	ClinVar/OMIM	ectopia lentis	0	C0024796;C0013581
ectopia lentis	ADAMTSL4	p.ser29=	NA	ClinVar/OMIM	ectopia lentis	0	C0024796;C0013581
ectopia lentis	ADAMTSL4	p.gly755=	NA	ClinVar/OMIM	ectopia lentis	0	C0024796;C0013581
ectopia lentis	ADAMTSL4	p.pro763arg	NA	ClinVar/OMIM	ectopia lentis	0	C0024796;C0013581
ectopia lentis	ADAMTSL4	p.pro763leu	NA	ClinVar/OMIM	ectopia lentis	0	C0024796;C0013581
ectopia lentis	ADAMTSL4	p.arg798trp	NA	ClinVar/OMIM	ectopia lentis	0	C0024796;C0013581
ectopia lentis	ADAMTSL4	p.arg901=	NA	ClinVar/OMIM	ectopia lentis	0	C0024796;C0013581
ectopia lentis	ADAMTSL4	p.arg932his	NA	ClinVar/OMIM	ectopia lentis	0	C0024796;C0013581
ectopia lentis	ADAMTSL4	p.ala961val	NA	ClinVar/OMIM	ectopia lentis	0	C0024796;C0013581
ectopia lentis	ADAMTSL4	p.gly988ala	NA	ClinVar/OMIM	ectopia lentis	0	C0024796;C0013581
ectopia lentis	ADAMTSL4	p.pro1010del	NA	ClinVar/OMIM	ectopia lentis	0	C0024796;C0013581
loeys-dietz syndrome	TGFB2	p.his13asn	NA	ClinVar/OMIM	loeys-dietz syndrome	0	C2697932
loeys-dietz syndrome	TGFB2	p.ala18thr	NA	ClinVar/OMIM	loeys-dietz syndrome	0	C2697932
loeys-dietz syndrome	TGFB2	p.ala18=	NA	ClinVar/OMIM	loeys-dietz syndrome	0	C2697932
holt-oram syndrome	TGFB2	p.glu197lys	NA	ClinVar/OMIM	holt-oram syndrome	0	C1623209;C0265264
loeys-dietz syndrome	TGFB2	p.leu224val	NA	ClinVar/OMIM	loeys-dietz syndrome	0	C2697932
loeys-dietz syndrome	TGFB2	p.ala343=	NA	ClinVar/OMIM	loeys-dietz syndrome	0	C2697932
loeys-dietz syndrome	TGFB2	p.ile394thr	NA	ClinVar/OMIM	loeys-dietz syndrome	0	C2697932
dyssegmental dysplasia	HSPG2	p.asn4385asp	NA	ClinVar/OMIM	dyssegmental dysplasia	0	C1857100
schwartz-jampel syndrome	HSPG2	p.ile4334val	NA	ClinVar/OMIM	schwartz-jampel syndrome	0	C0036391
schwartz-jampel syndrome	HSPG2	p.thr4118met	NA	ClinVar/OMIM	schwartz-jampel syndrome	0	C0036391
dyssegmental dysplasia	HSPG2	p.arg4003trp	NA	ClinVar/OMIM	dyssegmental dysplasia	0	C1857100
dyssegmental dysplasia	HSPG2	p.ser3883trp	NA	ClinVar/OMIM	dyssegmental dysplasia	0	C1857100
schwartz-jampel syndrome	HSPG2	p.pro3808ser	NA	ClinVar/OMIM	schwartz-jampel syndrome	0	C0036391
schwartz-jampel syndrome	HSPG2	p.val3729=	NA	ClinVar/OMIM	schwartz-jampel syndrome	0	C0036391
dyssegmental dysplasia	HSPG2	p.leu3621=	NA	ClinVar/OMIM	dyssegmental dysplasia	0	C1857100
schwartz-jampel syndrome	HSPG2	p.val3540ile	NA	ClinVar/OMIM	schwartz-jampel syndrome	0	C0036391
schwartz-jampel syndrome	HSPG2	p.pro3424=	NA	ClinVar/OMIM	schwartz-jampel syndrome	0	C0036391
schwartz-jampel syndrome	HSPG2	p.arg3354his	NA	ClinVar/OMIM	schwartz-jampel syndrome	0	C0036391
schwartz-jampel syndrome	HSPG2	p.thr3303met	NA	ClinVar/OMIM	schwartz-jampel syndrome	0	C0036391
schwartz-jampel syndrome	HSPG2	p.arg3059gln	NA	ClinVar/OMIM	schwartz-jampel syndrome	0	C0036391
dyssegmental dysplasia	HSPG2	p.arg3059trp	NA	ClinVar/OMIM	dyssegmental dysplasia	0	C1857100
dyssegmental dysplasia	HSPG2	p.val2838=	NA	ClinVar/OMIM	dyssegmental dysplasia	0	C1857100
schwartz-jampel syndrome	HSPG2	p.glu2811lys	NA	ClinVar/OMIM	schwartz-jampel syndrome	0	C0036391
dyssegmental dysplasia	HSPG2	p.ser2788=	NA	ClinVar/OMIM	dyssegmental dysplasia	0	C1857100
dyssegmental dysplasia	HSPG2	p.glu2742lys	NA	ClinVar/OMIM	dyssegmental dysplasia	0	C1857100
schwartz-jampel syndrome	HSPG2	p.his2624=	NA	ClinVar/OMIM	schwartz-jampel syndrome	0	C0036391
dyssegmental dysplasia	HSPG2	p.arg2537his	NA	ClinVar/OMIM	dyssegmental dysplasia	0	C1857100
schwartz-jampel syndrome	HSPG2	p.his2471tyr	NA	ClinVar/OMIM	schwartz-jampel syndrome	0	C0036391
schwartz-jampel syndrome	HSPG2	p.ala2449=	NA	ClinVar/OMIM	schwartz-jampel syndrome	0	C0036391
dyssegmental dysplasia	HSPG2	p.ala2449val	NA	ClinVar/OMIM	dyssegmental dysplasia	0	C1857100
dyssegmental dysplasia	HSPG2	p.his2369=	NA	ClinVar/OMIM	dyssegmental dysplasia	0	C1857100
dyssegmental dysplasia	HSPG2	p.glu2346lys	NA	ClinVar/OMIM	dyssegmental dysplasia	0	C1857100
dyssegmental dysplasia	HSPG2	p.thr2322=	NA	ClinVar/OMIM	dyssegmental dysplasia	0	C1857100
dyssegmental dysplasia	HSPG2	p.val2220=	NA	ClinVar/OMIM	dyssegmental dysplasia	0	C1857100
schwartz-jampel syndrome	HSPG2	p.tyr2216=	NA	ClinVar/OMIM	schwartz-jampel syndrome	0	C0036391
schwartz-jampel syndrome	HSPG2	p.arg2103=	NA	ClinVar/OMIM	schwartz-jampel syndrome	0	C0036391
schwartz-jampel syndrome	HSPG2	p.val2026leu	NA	ClinVar/OMIM	schwartz-jampel syndrome	0	C0036391
schwartz-jampel syndrome	HSPG2	p.leu2010pro	NA	ClinVar/OMIM	schwartz-jampel syndrome	0	C0036391
dyssegmental dysplasia	HSPG2	p.thr1972=	NA	ClinVar/OMIM	dyssegmental dysplasia	0	C1857100
dyssegmental dysplasia	HSPG2	p.gly1916asp	NA	ClinVar/OMIM	dyssegmental dysplasia	0	C1857100
schwartz-jampel syndrome	HSPG2	p.arg1886his	NA	ClinVar/OMIM	schwartz-jampel syndrome	0	C0036391
dyssegmental dysplasia	HSPG2	p.pro1872leu	NA	ClinVar/OMIM	dyssegmental dysplasia	0	C1857100
schwartz-jampel syndrome	HSPG2	p.arg1828leu	NA	ClinVar/OMIM	schwartz-jampel syndrome	0	C0036391
schwartz-jampel syndrome	HSPG2	p.gly1632ala	NA	ClinVar/OMIM	schwartz-jampel syndrome	0	C0036391
schwartz-jampel syndrome	HSPG2	p.glu1629=	NA	ClinVar/OMIM	schwartz-jampel syndrome	0	C0036391
schwartz-jampel syndrome	HSPG2	p.glu1561lys	NA	ClinVar/OMIM	schwartz-jampel syndrome	0	C0036391
schwartz-jampel syndrome	HSPG2	p.glu1526lys	NA	ClinVar/OMIM	schwartz-jampel syndrome	0	C0036391
dyssegmental dysplasia	HSPG2	p.leu1525=	NA	ClinVar/OMIM	dyssegmental dysplasia	0	C1857100
schwartz-jampel syndrome	HSPG2	p.asn1360asp	NA	ClinVar/OMIM	schwartz-jampel syndrome	0	C0036391
dyssegmental dysplasia	HSPG2	p.arg1244=	NA	ClinVar/OMIM	dyssegmental dysplasia	0	C1857100
dyssegmental dysplasia	HSPG2	p.ala1217pro	NA	ClinVar/OMIM	dyssegmental dysplasia	0	C1857100
dyssegmental dysplasia	HSPG2	p.cys1190=	NA	ClinVar/OMIM	dyssegmental dysplasia	0	C1857100
dyssegmental dysplasia	HSPG2	p.arg1186trp	NA	ClinVar/OMIM	dyssegmental dysplasia	0	C1857100
dyssegmental dysplasia	HSPG2	p.arg1146cys	NA	ClinVar/OMIM	dyssegmental dysplasia	0	C1857100
dyssegmental dysplasia	HSPG2	p.ala1044=	NA	ClinVar/OMIM	dyssegmental dysplasia	0	C1857100
schwartz-jampel syndrome	HSPG2	p.ala1044val	NA	ClinVar/OMIM	schwartz-jampel syndrome	0	C0036391
schwartz-jampel syndrome	HSPG2	p.gly1034ser	NA	ClinVar/OMIM	schwartz-jampel syndrome	0	C0036391
dyssegmental dysplasia	HSPG2	p.leu984his	NA	ClinVar/OMIM	dyssegmental dysplasia	0	C1857100
schwartz-jampel syndrome	HSPG2	p.arg931his	NA	ClinVar/OMIM	schwartz-jampel syndrome	0	C0036391
schwartz-jampel syndrome	HSPG2	p.tyr698his	NA	ClinVar/OMIM	schwartz-jampel syndrome	0	C0036391
dyssegmental dysplasia	HSPG2	p.pro676leu	NA	ClinVar/OMIM	dyssegmental dysplasia	0	C1857100
schwartz-jampel syndrome	HSPG2	p.arg675trp	NA	ClinVar/OMIM	schwartz-jampel syndrome	0	C0036391
dyssegmental dysplasia	HSPG2	p.arg534his	NA	ClinVar/OMIM	dyssegmental dysplasia	0	C1857100
dyssegmental dysplasia	HSPG2	p.arg467cys	NA	ClinVar/OMIM	dyssegmental dysplasia	0	C1857100
dyssegmental dysplasia	HSPG2	p.gly459val	NA	ClinVar/OMIM	dyssegmental dysplasia	0	C1857100
dyssegmental dysplasia	HSPG2	p.asn379ser	NA	ClinVar/OMIM	dyssegmental dysplasia	0	C1857100
dyssegmental dysplasia	HSPG2	p.gly320=	NA	ClinVar/OMIM	dyssegmental dysplasia	0	C1857100
schwartz-jampel syndrome	HSPG2	p.arg257pro	NA	ClinVar/OMIM	schwartz-jampel syndrome	0	C0036391
schwartz-jampel syndrome	HSPG2	p.ser253cys	NA	ClinVar/OMIM	schwartz-jampel syndrome	0	C0036391
dyssegmental dysplasia	HSPG2	p.ala156=	NA	ClinVar/OMIM	dyssegmental dysplasia	0	C1857100
schwartz-jampel syndrome	HSPG2	p.leu148=	NA	ClinVar/OMIM	schwartz-jampel syndrome	0	C0036391
heterotaxy syndrome	LEFTY2	p.ile270=	NA	ClinVar/OMIM	heterotaxy syndrome	0	C3178805
heterotaxy syndrome	LEFTY2	p.gln142glu	NA	ClinVar/OMIM	heterotaxy syndrome	0	C3178805
familial erythrocytosis	EGLN1	p.thr325=	NA	ClinVar/OMIM	familial erythrocytosis	0	C0152264
familial erythrocytosis	EGLN1	p.asp278asn	NA	ClinVar/OMIM	familial erythrocytosis	0	C0152264
familial erythrocytosis	EGLN1	p.ser247ala	NA	ClinVar/OMIM	familial erythrocytosis	0	C0152264
familial erythrocytosis	EGLN1	p.pro144=	NA	ClinVar/OMIM	familial erythrocytosis	0	C0152264
familial erythrocytosis	EGLN1	p.pro85ala	NA	ClinVar/OMIM	familial erythrocytosis	0	C0152264
familial erythrocytosis	EGLN1	p.arg18gln	NA	ClinVar/OMIM	familial erythrocytosis	0	C0152264
familial erythrocytosis	EGLN1	p.ser174=	NA	ClinVar/OMIM	familial erythrocytosis	0	C0152264
factor vii marburg i variant thrombophilia	HABP2	p.ala21=	NA	ClinVar/OMIM	factor vii marburg i variant thrombophilia	0	0
factor vii marburg i variant thrombophilia	HABP2	p.glu53gly	NA	ClinVar/OMIM	factor vii marburg i variant thrombophilia	0	0
factor vii marburg i variant thrombophilia	HABP2	p.leu89=	NA	ClinVar/OMIM	factor vii marburg i variant thrombophilia	0	0
factor vii marburg i variant thrombophilia	HABP2	p.tyr134=	NA	ClinVar/OMIM	factor vii marburg i variant thrombophilia	0	0
factor vii marburg i variant thrombophilia	HABP2	p.gly302glu	NA	ClinVar/OMIM	factor vii marburg i variant thrombophilia	0	0
factor vii marburg i variant thrombophilia	HABP2	p.lys310=	NA	ClinVar/OMIM	factor vii marburg i variant thrombophilia	0	0
factor vii marburg i variant thrombophilia	HABP2	p.gly344ser	NA	ClinVar/OMIM	factor vii marburg i variant thrombophilia	0	0
factor vii marburg i variant thrombophilia	HABP2	p.ala350=	NA	ClinVar/OMIM	factor vii marburg i variant thrombophilia	0	0
factor vii marburg i variant thrombophilia	HABP2	p.his386tyr	NA	ClinVar/OMIM	factor vii marburg i variant thrombophilia	0	0
factor vii marburg i variant thrombophilia	HABP2	p.thr514=	NA	ClinVar/OMIM	factor vii marburg i variant thrombophilia	0	0
factor vii marburg i variant thrombophilia	HABP2	p.gly519ser	NA	ClinVar/OMIM	factor vii marburg i variant thrombophilia	0	0
factor vii marburg i variant thrombophilia	HABP2	p.tyr521his	NA	ClinVar/OMIM	factor vii marburg i variant thrombophilia	0	0
partial epilepsy with auditory features	LGI1	p.arg273gln	NA	ClinVar/OMIM	partial epilepsy with auditory features	0	C1838062
partial epilepsy with auditory features	LGI1	p.ala375=	NA	ClinVar/OMIM	partial epilepsy with auditory features	0	C1838062
epilepsy, lateral temporal lobe, autosomal dominant	LGI1	p.ile446leu	NA	ClinVar/OMIM	epilepsy, lateral temporal lobe, autosomal dominant	0	C1838062
seizures	LGI1	p.ser464=	NA	ClinVar/OMIM	seizures	0	C0036572	B
nonsyndromic hearing loss, recessive	TECTA	p.tyr176=	NA	ClinVar/OMIM	nonsyndromic hearing loss, recessive	0	C3711374	C
nonsyndromic hearing loss, recessive	TECTA	p.phe178cys	NA	ClinVar/OMIM	nonsyndromic hearing loss, recessive	0	C3711374	C
nonsyndromic hearing loss, recessive	TECTA	p.gly196=	NA	ClinVar/OMIM	nonsyndromic hearing loss, recessive	0	C3711374	C
nonsyndromic hearing loss, recessive	TECTA	p.ile254=	NA	ClinVar/OMIM	nonsyndromic hearing loss, recessive	0	C3711374	C
nonsyndromic hearing loss, dominant	TECTA	p.arg284his	NA	ClinVar/OMIM	nonsyndromic hearing loss, dominant	0	C3711374	C
nonsyndromic hearing loss, dominant	TECTA	p.arg350gln	NA	ClinVar/OMIM	nonsyndromic hearing loss, dominant	0	C3711374	C
nonsyndromic hearing loss, recessive	TECTA	p.val429met	NA	ClinVar/OMIM	nonsyndromic hearing loss, recessive	0	C3711374	C
nonsyndromic hearing loss, recessive	TECTA	p.ser452=	NA	ClinVar/OMIM	nonsyndromic hearing loss, recessive	0	C3711374	C
nonsyndromic hearing loss, dominant	TECTA	p.arg474cys	NA	ClinVar/OMIM	nonsyndromic hearing loss, dominant	0	C3711374	C
nonsyndromic hearing loss, recessive	TECTA	p.cys565tyr	NA	ClinVar/OMIM	nonsyndromic hearing loss, recessive	0	C3711374	C
nonsyndromic hearing loss, dominant	TECTA	p.gln635his	NA	ClinVar/OMIM	nonsyndromic hearing loss, dominant	0	C3711374	C
nonsyndromic hearing loss, dominant	TECTA	p.ala727pro	NA	ClinVar/OMIM	nonsyndromic hearing loss, dominant	0	C3711374	C
nonsyndromic hearing loss, recessive	TECTA	p.leu862=	NA	ClinVar/OMIM	nonsyndromic hearing loss, recessive	0	C3711374	C
nonsyndromic hearing loss, recessive	TECTA	p.arg959gln	NA	ClinVar/OMIM	nonsyndromic hearing loss, recessive	0	C3711374	C
nonsyndromic hearing loss, dominant	TECTA	p.gln1044his	NA	ClinVar/OMIM	nonsyndromic hearing loss, dominant	0	C3711374	C
nonsyndromic hearing loss, recessive	TECTA	p.ala1046=	NA	ClinVar/OMIM	nonsyndromic hearing loss, recessive	0	C3711374	C
nonsyndromic hearing loss, dominant	TECTA	p.cys1072=	NA	ClinVar/OMIM	nonsyndromic hearing loss, dominant	0	C3711374	C
nonsyndromic hearing loss, recessive	TECTA	p.arg1186=	NA	ClinVar/OMIM	nonsyndromic hearing loss, recessive	0	C3711374	C
nonsyndromic hearing loss, recessive	TECTA	p.arg1243his	NA	ClinVar/OMIM	nonsyndromic hearing loss, recessive	0	C3711374	C
nonsyndromic hearing loss, recessive	TECTA	p.met1254val	NA	ClinVar/OMIM	nonsyndromic hearing loss, recessive	0	C3711374	C
nonsyndromic hearing loss, recessive	TECTA	p.met1254ile	NA	ClinVar/OMIM	nonsyndromic hearing loss, recessive	0	C3711374	C
nonsyndromic hearing loss, recessive	TECTA	p.thr1354ser	NA	ClinVar/OMIM	nonsyndromic hearing loss, recessive	0	C3711374	C
nonsyndromic hearing loss, recessive	TECTA	p.cys1402ser	NA	ClinVar/OMIM	nonsyndromic hearing loss, recessive	0	C3711374	C
nonsyndromic hearing loss, recessive	TECTA	p.asp1430gly	NA	ClinVar/OMIM	nonsyndromic hearing loss, recessive	0	C3711374	C
nonsyndromic hearing loss, dominant	TECTA	p.thr1446arg	NA	ClinVar/OMIM	nonsyndromic hearing loss, dominant	0	C3711374	C
nonsyndromic hearing loss, recessive	TECTA	p.leu1614=	NA	ClinVar/OMIM	nonsyndromic hearing loss, recessive	0	C3711374	C
nonsyndromic hearing loss, dominant	TECTA	p.gly1655=	NA	ClinVar/OMIM	nonsyndromic hearing loss, dominant	0	C3711374	C
nonsyndromic hearing loss, dominant	TECTA	p.met1697ile	NA	ClinVar/OMIM	nonsyndromic hearing loss, dominant	0	C3711374	C
nonsyndromic hearing loss, recessive	TECTA	p.tyr1705cys	NA	ClinVar/OMIM	nonsyndromic hearing loss, recessive	0	C3711374	C
nonsyndromic hearing loss, dominant	TECTA	p.ile1832met	NA	ClinVar/OMIM	nonsyndromic hearing loss, dominant	0	C3711374	C
nonsyndromic hearing loss, dominant	TECTA	p.ile1850met	NA	ClinVar/OMIM	nonsyndromic hearing loss, dominant	0	C3711374	C
nonsyndromic hearing loss, dominant	TECTA	p.val1861=	NA	ClinVar/OMIM	nonsyndromic hearing loss, dominant	0	C3711374	C
nonsyndromic hearing loss, recessive	TECTA	p.pro1924thr	NA	ClinVar/OMIM	nonsyndromic hearing loss, recessive	0	C3711374	C
nonsyndromic hearing loss, dominant	TECTA	p.lys1943=	NA	ClinVar/OMIM	nonsyndromic hearing loss, dominant	0	C3711374	C
nonsyndromic hearing loss, dominant	TECTA	p.thr1971=	NA	ClinVar/OMIM	nonsyndromic hearing loss, dominant	0	C3711374	C
nonsyndromic hearing loss, dominant	TECTA	p.cys2045=	NA	ClinVar/OMIM	nonsyndromic hearing loss, dominant	0	C3711374	C
keutel syndrome	MGP	p.cys104=	NA	ClinVar/OMIM	keutel syndrome	0	C1855607
keutel syndrome	MGP	p.val16ile	NA	ClinVar/OMIM	keutel syndrome	0	C1855607
46,xy dsd/46,xy cgd	DHH	p.arg309leu	NA	ClinVar/OMIM	46,xy dsd/46,xy cgd	0	C2751824
46,xy dsd/46,xy cgd	DHH	p.phe242=	NA	ClinVar/OMIM	46,xy dsd/46,xy cgd	0	C2751824
46,xy dsd/46,xy cgd	DHH	p.ala196glu	NA	ClinVar/OMIM	46,xy dsd/46,xy cgd	0	C2751824
46,xy dsd/46,xy cgd	DHH	p.leu123=	NA	ClinVar/OMIM	46,xy dsd/46,xy cgd	0	C2751824
von willebrand disease	VWF	p.thr2789ser	NA	ClinVar/OMIM	von willebrand disease	0	C1264040;C0042974	A
von willebrand disease	VWF	p.his2699arg	NA	ClinVar/OMIM	von willebrand disease	0	C1264040;C0042974	A
von willebrand disease	VWF	p.cys2649=	NA	ClinVar/OMIM	von willebrand disease	0	C1264040;C0042974	A
von willebrand disease	VWF	p.ile2597asn	NA	ClinVar/OMIM	von willebrand disease	0	C1264040;C0042974	A
von willebrand disease	VWF	p.ala2414thr	NA	ClinVar/OMIM	von willebrand disease	0	C1264040;C0042974	A
von willebrand disease	VWF	p.pro2336leu	NA	ClinVar/OMIM	von willebrand disease	0	C1264040;C0042974	A
von willebrand disease	VWF	p.val2191ala	NA	ClinVar/OMIM	von willebrand disease	0	C1264040;C0042974	A
von willebrand disease	VWF	p.asn2066asp	NA	ClinVar/OMIM	von willebrand disease	0	C1264040;C0042974	A
von willebrand disease	VWF	p.glu2015lys	NA	ClinVar/OMIM	von willebrand disease	0	C1264040;C0042974	A
von willebrand disease	VWF	p.val1959gly	NA	ClinVar/OMIM	von willebrand disease	0	C1264040;C0042974	A
von willebrand disease	VWF	p.tyr1831=	NA	ClinVar/OMIM	von willebrand disease	0	C1264040;C0042974	A
von willebrand disease	VWF	p.ile1368thr	NA	ClinVar/OMIM	von willebrand disease	0	C1264040;C0042974	A
von willebrand disease	VWF	p.arg1336gln	NA	ClinVar/OMIM	von willebrand disease	0	C1264040;C0042974	A
von willebrand disease	VWF	p.pro1240=	NA	ClinVar/OMIM	von willebrand disease	0	C1264040;C0042974	A
von willebrand disease	VWF	p.thr1054=	NA	ClinVar/OMIM	von willebrand disease	0	C1264040;C0042974	A
von willebrand disease	VWF	p.arg763=	NA	ClinVar/OMIM	von willebrand disease	0	C1264040;C0042974	A
von willebrand disease	VWF	p.pro675=	NA	ClinVar/OMIM	von willebrand disease	0	C1264040;C0042974	A
von willebrand disease	VWF	p.cys621ser	NA	ClinVar/OMIM	von willebrand disease	0	C1264040;C0042974	A
von willebrand disease	VWF	p.cys584=	NA	ClinVar/OMIM	von willebrand disease	0	C1264040;C0042974	A
von willebrand disease	VWF	p.asn381ser	NA	ClinVar/OMIM	von willebrand disease	0	C1264040;C0042974	A
von willebrand disease	VWF	p.val351met	NA	ClinVar/OMIM	von willebrand disease	0	C1264040;C0042974	A
von willebrand disease	VWF	p.thr286=	NA	ClinVar/OMIM	von willebrand disease	0	C1264040;C0042974	A
congenital stromal corneal dystrophy	DCN	p.gln354his	NA	ClinVar/OMIM	congenital stromal corneal dystrophy	0	C1864738
congenital stromal corneal dystrophy	DCN	p.val306ala	NA	ClinVar/OMIM	congenital stromal corneal dystrophy	0	C1864738
congenital stromal corneal dystrophy	DCN	p.ile177phe	NA	ClinVar/OMIM	congenital stromal corneal dystrophy	0	C1864738
congenital stromal corneal dystrophy	DCN	p.pro18=	NA	ClinVar/OMIM	congenital stromal corneal dystrophy	0	C1864738
spinocerebellar ataxia, dominant	FGF14	p.ala236=	NA	ClinVar/OMIM	spinocerebellar ataxia, dominant	0	C0087012
spinocerebellar ataxia, dominant	FGF14	p.gly227arg	NA	ClinVar/OMIM	spinocerebellar ataxia, dominant	0	C0087012
spinocerebellar ataxia, dominant	FGF14	p.thr222=	NA	ClinVar/OMIM	spinocerebellar ataxia, dominant	0	C0087012
spinocerebellar ataxia, dominant	FGF14	p.arg212gln	NA	ClinVar/OMIM	spinocerebellar ataxia, dominant	0	C0087012
spinocerebellar ataxia, dominant	FGF14	p.ser164=	NA	ClinVar/OMIM	spinocerebellar ataxia, dominant	0	C0087012
brain small vessel disease with hemorrhage	COL4A1	p.ala1553val	NA	ClinVar/OMIM	brain small vessel disease with hemorrhage	0	C1843512;C3810309
brain small vessel disease with hemorrhage	COL4A1	p.pro1424leu	NA	ClinVar/OMIM	brain small vessel disease with hemorrhage	0	C1843512;C3810309
porencephaly	COL4A1	p.pro1346=	NA	ClinVar/OMIM	porencephaly	0	C0151860
hereditary angiopathy with nephropathy, aneurysms, and muscle cramps	COL4A1	p.leu1324=	NA	ClinVar/OMIM	hereditary angiopathy with nephropathy, aneurysms, and muscle cramps	0	C2673195
hereditary angiopathy with nephropathy, aneurysms, and muscle cramps	COL4A1	p.thr1144arg	NA	ClinVar/OMIM	hereditary angiopathy with nephropathy, aneurysms, and muscle cramps	0	C2673195
porencephaly	COL4A1	p.lys1081glu	NA	ClinVar/OMIM	porencephaly	0	C0151860
porencephaly	COL4A1	p.pro1055leu	NA	ClinVar/OMIM	porencephaly	0	C0151860
porencephaly	COL4A1	p.leu1006=	NA	ClinVar/OMIM	porencephaly	0	C0151860
porencephaly	COL4A1	p.pro911leu	NA	ClinVar/OMIM	porencephaly	0	C0151860
porencephaly	COL4A1	p.pro902=	NA	ClinVar/OMIM	porencephaly	0	C0151860
brain small vessel disease with hemorrhage	COL4A1	p.pro875arg	NA	ClinVar/OMIM	brain small vessel disease with hemorrhage	0	C1843512;C3810309
brain small vessel disease with hemorrhage	COL4A1	p.pro754=	NA	ClinVar/OMIM	brain small vessel disease with hemorrhage	0	C1843512;C3810309
brain small vessel disease with hemorrhage	COL4A1	p.pro709leu	NA	ClinVar/OMIM	brain small vessel disease with hemorrhage	0	C1843512;C3810309
brain small vessel disease with hemorrhage	COL4A1	p.gln462arg	NA	ClinVar/OMIM	brain small vessel disease with hemorrhage	0	C1843512;C3810309
brain small vessel disease with hemorrhage	COL4A1	p.thr256ala	NA	ClinVar/OMIM	brain small vessel disease with hemorrhage	0	C1843512;C3810309
brain small vessel disease with hemorrhage	COL4A1	p.gly127val	NA	ClinVar/OMIM	brain small vessel disease with hemorrhage	0	C1843512;C3810309
brain small vessel disease with hemorrhage	COL4A1	p.lys28glu	NA	ClinVar/OMIM	brain small vessel disease with hemorrhage	0	C1843512;C3810309
porencephaly	COL4A2	p.pro132leu	NA	ClinVar/OMIM	porencephaly	0	C0151860
porencephaly	COL4A2	p.gly139arg	NA	ClinVar/OMIM	porencephaly	0	C0151860
porencephaly	COL4A2	p.thr156=	NA	ClinVar/OMIM	porencephaly	0	C0151860
porencephaly	COL4A2	p.ile261=	NA	ClinVar/OMIM	porencephaly	0	C0151860
porencephaly	COL4A2	p.leu303=	NA	ClinVar/OMIM	porencephaly	0	C0151860
porencephaly	COL4A2	p.asp331gly	NA	ClinVar/OMIM	porencephaly	0	C0151860
porencephaly	COL4A2	p.pro365leu	NA	ClinVar/OMIM	porencephaly	0	C0151860
porencephaly	COL4A2	p.pro403leu	NA	ClinVar/OMIM	porencephaly	0	C0151860
porencephaly	COL4A2	p.ala419val	NA	ClinVar/OMIM	porencephaly	0	C0151860
porencephaly	COL4A2	p.arg484thr	NA	ClinVar/OMIM	porencephaly	0	C0151860
porencephaly	COL4A2	p.gly569glu	NA	ClinVar/OMIM	porencephaly	0	C0151860
porencephaly	COL4A2	p.asp580asn	NA	ClinVar/OMIM	porencephaly	0	C0151860
porencephaly	COL4A2	p.pro591arg	NA	ClinVar/OMIM	porencephaly	0	C0151860
porencephaly	COL4A2	p.pro649ser	NA	ClinVar/OMIM	porencephaly	0	C0151860
porencephaly	COL4A2	p.pro773ser	NA	ClinVar/OMIM	porencephaly	0	C0151860
porencephaly	COL4A2	p.ser810asn	NA	ClinVar/OMIM	porencephaly	0	C0151860
porencephaly	COL4A2	p.gly815ala	NA	ClinVar/OMIM	porencephaly	0	C0151860
porencephaly	COL4A2	p.pro1029=	NA	ClinVar/OMIM	porencephaly	0	C0151860
porencephaly	COL4A2	p.thr1096ala	NA	ClinVar/OMIM	porencephaly	0	C0151860
porencephaly	COL4A2	p.thr1111ile	NA	ClinVar/OMIM	porencephaly	0	C0151860
porencephaly	COL4A2	p.pro1286ser	NA	ClinVar/OMIM	porencephaly	0	C0151860
porencephaly	COL4A2	p.ala1305=	NA	ClinVar/OMIM	porencephaly	0	C0151860
porencephaly	COL4A2	p.asp1366asn	NA	ClinVar/OMIM	porencephaly	0	C0151860
porencephaly	COL4A2	p.pro1476=	NA	ClinVar/OMIM	porencephaly	0	C0151860
porencephaly	COL4A2	p.pro1479leu	NA	ClinVar/OMIM	porencephaly	0	C0151860
porencephaly	COL4A2	p.glu1521lys	NA	ClinVar/OMIM	porencephaly	0	C0151860
porencephaly	COL4A2	p.asn1561=	NA	ClinVar/OMIM	porencephaly	0	C0151860
porencephaly	COL4A2	p.pro1577=	NA	ClinVar/OMIM	porencephaly	0	C0151860
porencephaly	COL4A2	p.ile1656=	NA	ClinVar/OMIM	porencephaly	0	C0151860
porencephaly	COL4A2	p.ala1695=	NA	ClinVar/OMIM	porencephaly	0	C0151860
porencephaly	COL4A2	p.arg1704leu	NA	ClinVar/OMIM	porencephaly	0	C0151860
omodysplasia	GPC6	p.leu17ile	NA	ClinVar/OMIM	omodysplasia	0	C1850318
omodysplasia	GPC6	p.asp195=	NA	ClinVar/OMIM	omodysplasia	0	C1850318
omodysplasia	GPC6	p.arg363his	NA	ClinVar/OMIM	omodysplasia	0	C1850318
omodysplasia	GPC6	p.thr379=	NA	ClinVar/OMIM	omodysplasia	0	C1850318
omodysplasia	GPC6	p.ile406val	NA	ClinVar/OMIM	omodysplasia	0	C1850318
omodysplasia	GPC6	p.ser499asn	NA	ClinVar/OMIM	omodysplasia	0	C1850318
omodysplasia	GPC6	p.thr508=	NA	ClinVar/OMIM	omodysplasia	0	C1850318
omodysplasia	GPC6	p.arg524trp	NA	ClinVar/OMIM	omodysplasia	0	C1850318
bmp4-related syndromic microphthalmia	BMP4	p.glu96=	NA	ClinVar/OMIM	bmp4-related syndromic microphthalmia	0	C1568257;C1412805;C0530979
weill-marchesani-like syndrome	ADAMTS17	p.ser1095=	NA	ClinVar/OMIM	weill-marchesani-like syndrome	0	C2750787
weill-marchesani-like syndrome	ADAMTS17	p.thr1055=	NA	ClinVar/OMIM	weill-marchesani-like syndrome	0	C2750787
weill-marchesani-like syndrome	ADAMTS17	p.lys1048=	NA	ClinVar/OMIM	weill-marchesani-like syndrome	0	C2750787
weill-marchesani-like syndrome	ADAMTS17	p.thr1046=	NA	ClinVar/OMIM	weill-marchesani-like syndrome	0	C2750787
weill-marchesani-like syndrome	ADAMTS17	p.ile1037=	NA	ClinVar/OMIM	weill-marchesani-like syndrome	0	C2750787
weill-marchesani-like syndrome	ADAMTS17	p.cys1023tyr	NA	ClinVar/OMIM	weill-marchesani-like syndrome	0	C2750787
weill-marchesani-like syndrome	ADAMTS17	p.glu975lys	NA	ClinVar/OMIM	weill-marchesani-like syndrome	0	C2750787
weill-marchesani-like syndrome	ADAMTS17	p.pro961=	NA	ClinVar/OMIM	weill-marchesani-like syndrome	0	C2750787
weill-marchesani-like syndrome	ADAMTS17	p.ala911pro	NA	ClinVar/OMIM	weill-marchesani-like syndrome	0	C2750787
weill-marchesani-like syndrome	ADAMTS17	p.his668=	NA	ClinVar/OMIM	weill-marchesani-like syndrome	0	C2750787
weill-marchesani-like syndrome	ADAMTS17	p.tyr661his	NA	ClinVar/OMIM	weill-marchesani-like syndrome	0	C2750787
weill-marchesani-like syndrome	ADAMTS17	p.gly641=	NA	ClinVar/OMIM	weill-marchesani-like syndrome	0	C2750787
weill-marchesani-like syndrome	ADAMTS17	p.pro602ser	NA	ClinVar/OMIM	weill-marchesani-like syndrome	0	C2750787
weill-marchesani-like syndrome	ADAMTS17	p.arg566=	NA	ClinVar/OMIM	weill-marchesani-like syndrome	0	C2750787
weill-marchesani-like syndrome	ADAMTS17	p.ala529=	NA	ClinVar/OMIM	weill-marchesani-like syndrome	0	C2750787
weill-marchesani-like syndrome	ADAMTS17	p.gln477his	NA	ClinVar/OMIM	weill-marchesani-like syndrome	0	C2750787
weill-marchesani-like syndrome	ADAMTS17	p.thr446ile	NA	ClinVar/OMIM	weill-marchesani-like syndrome	0	C2750787
weill-marchesani-like syndrome	ADAMTS17	p.glu416=	NA	ClinVar/OMIM	weill-marchesani-like syndrome	0	C2750787
weill-marchesani-like syndrome	ADAMTS17	p.his403arg	NA	ClinVar/OMIM	weill-marchesani-like syndrome	0	C2750787
weill-marchesani-like syndrome	ADAMTS17	p.asn382ser	NA	ClinVar/OMIM	weill-marchesani-like syndrome	0	C2750787
weill-marchesani-like syndrome	ADAMTS17	p.val336=	NA	ClinVar/OMIM	weill-marchesani-like syndrome	0	C2750787
weill-marchesani-like syndrome	ADAMTS17	p.leu237=	NA	ClinVar/OMIM	weill-marchesani-like syndrome	0	C2750787
weill-marchesani-like syndrome	ADAMTS17	p.ser174arg	NA	ClinVar/OMIM	weill-marchesani-like syndrome	0	C2750787
weill-marchesani-like syndrome	ADAMTS17	p.arg75leu	NA	ClinVar/OMIM	weill-marchesani-like syndrome	0	C2750787
weill-marchesani-like syndrome	ADAMTS17	p.ala56=	NA	ClinVar/OMIM	weill-marchesani-like syndrome	0	C2750787
acid-labile subunit deficiency	IGFALS	p.ile565thr	NA	ClinVar/OMIM	acid-labile subunit deficiency	0	C3900122
acid-labile subunit deficiency	IGFALS	p.arg548trp	NA	ClinVar/OMIM	acid-labile subunit deficiency	0	C3900122
acid-labile subunit deficiency	IGFALS	p.val489ala	NA	ClinVar/OMIM	acid-labile subunit deficiency	0	C3900122
acid-labile subunit deficiency	IGFALS	p.leu391=	NA	ClinVar/OMIM	acid-labile subunit deficiency	0	C3900122
acid-labile subunit deficiency	IGFALS	p.thr344met	NA	ClinVar/OMIM	acid-labile subunit deficiency	0	C3900122
acid-labile subunit deficiency	IGFALS	p.gly291asp	NA	ClinVar/OMIM	acid-labile subunit deficiency	0	C3900122
acid-labile subunit deficiency	IGFALS	p.pro259=	NA	ClinVar/OMIM	acid-labile subunit deficiency	0	C3900122
acid-labile subunit deficiency	IGFALS	p.asn228=	NA	ClinVar/OMIM	acid-labile subunit deficiency	0	C3900122
acid-labile subunit deficiency	IGFALS	p.gly216ser	NA	ClinVar/OMIM	acid-labile subunit deficiency	0	C3900122
acid-labile subunit deficiency	IGFALS	p.glu114lys	NA	ClinVar/OMIM	acid-labile subunit deficiency	0	C3900122
acid-labile subunit deficiency	IGFALS	p.gln77lys	NA	ClinVar/OMIM	acid-labile subunit deficiency	0	C3900122
acid-labile subunit deficiency	IGFALS	p.ala36=	NA	ClinVar/OMIM	acid-labile subunit deficiency	0	C3900122
acid-labile subunit deficiency	IGFALS	p.gly31arg	NA	ClinVar/OMIM	acid-labile subunit deficiency	0	C3900122
multicentric osteolysis-nodulosis-arthropathy (mona) spectrum disorders	MMP2	p.ala196=	NA	ClinVar/OMIM	multicentric osteolysis-nodulosis-arthropathy	0	C0917715
multicentric osteolysis-nodulosis-arthropathy (mona) spectrum disorders	MMP2	p.asp382asn	NA	ClinVar/OMIM	multicentric osteolysis-nodulosis-arthropathy	0	C0917715
multicentric osteolysis-nodulosis-arthropathy (mona) spectrum disorders	MMP2	p.val523leu	NA	ClinVar/OMIM	multicentric osteolysis-nodulosis-arthropathy	0	C0917715
multicentric osteolysis-nodulosis-arthropathy (mona) spectrum disorders	MMP2	p.tyr524=	NA	ClinVar/OMIM	multicentric osteolysis-nodulosis-arthropathy	0	C0917715
multicentric osteolysis-nodulosis-arthropathy (mona) spectrum disorders	MMP2	p.glu593=	NA	ClinVar/OMIM	multicentric osteolysis-nodulosis-arthropathy	0	C0917715
osteogenesis imperfecta, recessive	SERPINF1	p.thr371ile	NA	ClinVar/OMIM	osteogenesis imperfecta, recessive	0	C2931095;C1853162
osteogenesis imperfecta, recessive	SERPINF1	p.ile409thr	NA	ClinVar/OMIM	osteogenesis imperfecta, recessive	0	C2931095;C1853162
osteogenesis imperfecta, recessive	SERPINF1	p.leu280=	NA	ClinVar/OMIM	osteogenesis imperfecta, recessive	0	C2931095;C1853162
osteogenesis imperfecta, recessive	SERPINF1	p.thr238ile	NA	ClinVar/OMIM	osteogenesis imperfecta, recessive	0	C2931095;C1853162
osteogenesis imperfecta, recessive	SERPINF1	p.thr196ile	NA	ClinVar/OMIM	osteogenesis imperfecta, recessive	0	C2931095;C1853162
osteogenesis imperfecta, recessive	SERPINF1	p.ser115=	NA	ClinVar/OMIM	osteogenesis imperfecta, recessive	0	C2931095;C1853162
osteogenesis imperfecta, recessive	SERPINF1	p.ala86val	NA	ClinVar/OMIM	osteogenesis imperfecta, recessive	0	C2931095;C1853162
osteogenesis imperfecta, recessive	SERPINF1	p.pro45leu	NA	ClinVar/OMIM	osteogenesis imperfecta, recessive	0	C2931095;C1853162
isolated growth hormone deficiency	GH1	p.leu188pro	NA	ClinVar/OMIM	isolated growth hormone deficiency	0	C0013338;C4016761;C2826280;C0338503
isolated growth hormone deficiency	GH1	p.arg160trp	NA	ClinVar/OMIM	isolated growth hormone deficiency	0	C0013338;C4016761;C2826280;C0338503
isolated growth hormone deficiency	GH1	p.arg103=	NA	ClinVar/OMIM	isolated growth hormone deficiency	0	C0013338;C4016761;C2826280;C0338503
isolated growth hormone deficiency	GH1	p.ala43thr	NA	ClinVar/OMIM	isolated growth hormone deficiency	0	C0013338;C4016761;C2826280;C0338503
isolated growth hormone deficiency	GH1	p.gln22=	NA	ClinVar/OMIM	isolated growth hormone deficiency	0	C0013338;C4016761;C2826280;C0338503
cutis laxa with severe pulmonary, gastrointestinal, and urinary abnormalities	LTBP4	p.arg65lys	NA	ClinVar/OMIM	cutis laxa with severe pulmonary, gastrointestinal, and urinary abnormalities	0	C2750804
cutis laxa with severe pulmonary, gastrointestinal, and urinary abnormalities	LTBP4	p.leu71=	NA	ClinVar/OMIM	cutis laxa with severe pulmonary, gastrointestinal, and urinary abnormalities	0	C2750804
cutis laxa with severe pulmonary, gastrointestinal, and urinary abnormalities	LTBP4	p.tyr243=	NA	ClinVar/OMIM	cutis laxa with severe pulmonary, gastrointestinal, and urinary abnormalities	0	C2750804
cutis laxa with severe pulmonary, gastrointestinal, and urinary abnormalities	LTBP4	p.ser263phe	NA	ClinVar/OMIM	cutis laxa with severe pulmonary, gastrointestinal, and urinary abnormalities	0	C2750804
cutis laxa with severe pulmonary, gastrointestinal, and urinary abnormalities	LTBP4	p.val576met	NA	ClinVar/OMIM	cutis laxa with severe pulmonary, gastrointestinal, and urinary abnormalities	0	C2750804
cutis laxa with severe pulmonary, gastrointestinal, and urinary abnormalities	LTBP4	p.pro642leu	NA	ClinVar/OMIM	cutis laxa with severe pulmonary, gastrointestinal, and urinary abnormalities	0	C2750804
cutis laxa with severe pulmonary, gastrointestinal, and urinary abnormalities	LTBP4	p.arg730trp	NA	ClinVar/OMIM	cutis laxa with severe pulmonary, gastrointestinal, and urinary abnormalities	0	C2750804
cutis laxa with severe pulmonary, gastrointestinal, and urinary abnormalities	LTBP4	p.asn749lys	NA	ClinVar/OMIM	cutis laxa with severe pulmonary, gastrointestinal, and urinary abnormalities	0	C2750804
cutis laxa with severe pulmonary, gastrointestinal, and urinary abnormalities	LTBP4	p.gly837arg	NA	ClinVar/OMIM	cutis laxa with severe pulmonary, gastrointestinal, and urinary abnormalities	0	C2750804
cutis laxa with severe pulmonary, gastrointestinal, and urinary abnormalities	LTBP4	p.asn943=	NA	ClinVar/OMIM	cutis laxa with severe pulmonary, gastrointestinal, and urinary abnormalities	0	C2750804
cutis laxa with severe pulmonary, gastrointestinal, and urinary abnormalities	LTBP4	p.tyr975=	NA	ClinVar/OMIM	cutis laxa with severe pulmonary, gastrointestinal, and urinary abnormalities	0	C2750804
cutis laxa with severe pulmonary, gastrointestinal, and urinary abnormalities	LTBP4	p.gly1008=	NA	ClinVar/OMIM	cutis laxa with severe pulmonary, gastrointestinal, and urinary abnormalities	0	C2750804
cutis laxa with severe pulmonary, gastrointestinal, and urinary abnormalities	LTBP4	p.gly1140glu	NA	ClinVar/OMIM	cutis laxa with severe pulmonary, gastrointestinal, and urinary abnormalities	0	C2750804
cutis laxa with severe pulmonary, gastrointestinal, and urinary abnormalities	LTBP4	p.pro1371arg	NA	ClinVar/OMIM	cutis laxa with severe pulmonary, gastrointestinal, and urinary abnormalities	0	C2750804
cutis laxa with severe pulmonary, gastrointestinal, and urinary abnormalities	LTBP4	p.pro1375ala	NA	ClinVar/OMIM	cutis laxa with severe pulmonary, gastrointestinal, and urinary abnormalities	0	C2750804
cutis laxa with severe pulmonary, gastrointestinal, and urinary abnormalities	LTBP4	p.gly1420glu	NA	ClinVar/OMIM	cutis laxa with severe pulmonary, gastrointestinal, and urinary abnormalities	0	C2750804
weill-marchesani syndrome	ADAMTS10	p.ala1090thr	NA	ClinVar/OMIM	weill-marchesani syndrome	0	C0265313
weill-marchesani syndrome	ADAMTS10	p.cys1053=	NA	ClinVar/OMIM	weill-marchesani syndrome	0	C0265313
weill-marchesani syndrome	ADAMTS10	p.asn740=	NA	ClinVar/OMIM	weill-marchesani syndrome	0	C0265313
weill-marchesani syndrome	ADAMTS10	p.val669leu	NA	ClinVar/OMIM	weill-marchesani syndrome	0	C0265313
weill-marchesani syndrome	ADAMTS10	p.pro663thr	NA	ClinVar/OMIM	weill-marchesani syndrome	0	C0265313
weill-marchesani syndrome	ADAMTS10	p.lys627thr	NA	ClinVar/OMIM	weill-marchesani syndrome	0	C0265313
weill-marchesani syndrome	ADAMTS10	p.thr523=	NA	ClinVar/OMIM	weill-marchesani syndrome	0	C0265313
weill-marchesani syndrome	ADAMTS10	p.thr510=	NA	ClinVar/OMIM	weill-marchesani syndrome	0	C0265313
weill-marchesani syndrome	ADAMTS10	p.his392=	NA	ClinVar/OMIM	weill-marchesani syndrome	0	C0265313
weill-marchesani syndrome	ADAMTS10	p.ser278=	NA	ClinVar/OMIM	weill-marchesani syndrome	0	C0265313
ehlers-danlos syndrome, type viia	COL5A2	p.val1445ile	NA	ClinVar/OMIM	ehlers-danlos syndrome, type viia	0	C0013720	A
ehlers-danlos syndrome, type viia	COL5A2	p.pro1223leu	NA	ClinVar/OMIM	ehlers-danlos syndrome, type viia	0	C0013720	A
ehlers-danlos syndrome, type viia	COL5A2	p.arg1127cys	NA	ClinVar/OMIM	ehlers-danlos syndrome, type viia	0	C0013720	A
ehlers-danlos syndrome, type viia	COL5A2	p.asn1040ser	NA	ClinVar/OMIM	ehlers-danlos syndrome, type viia	0	C0013720	A
ehlers-danlos syndrome, type viia	COL5A2	p.leu823ser	NA	ClinVar/OMIM	ehlers-danlos syndrome, type viia	0	C0013720	A
ehlers-danlos syndrome, type viia	COL5A2	p.gly450=	NA	ClinVar/OMIM	ehlers-danlos syndrome, type viia	0	C0013720	A
ehlers-danlos syndrome, type viia	COL5A2	p.pro184=	NA	ClinVar/OMIM	ehlers-danlos syndrome, type viia	0	C0013720	A
ehlers-danlos syndrome, type viia	COL5A2	p.his178tyr	NA	ClinVar/OMIM	ehlers-danlos syndrome, type viia	0	C0013720	A
acromesomelic dysplasia	GDF5	p.thr368=	NA	ClinVar/OMIM	acromesomelic dysplasia	0	C2930970
brachydactyly	GDF5	p.arg334gly	NA	ClinVar/OMIM	brachydactyly	0	C0221357
chondrodysplasia	GDF5	p.arg318pro	NA	ClinVar/OMIM	chondrodysplasia	0	C0343284
brachydactyly	GDF5	p.asn56lys	NA	ClinVar/OMIM	brachydactyly	0	C0221357
galactosialidosis	CTSA	p.gly125ser	NA	ClinVar/OMIM	galactosialidosis	0	C0268233
galactosialidosis	CTSA	p.arg283cys	NA	ClinVar/OMIM	galactosialidosis	0	C0268233
galactosialidosis	CTSA	p.pro298leu	NA	ClinVar/OMIM	galactosialidosis	0	C0268233
galactosialidosis	CTSA	p.val364met	NA	ClinVar/OMIM	galactosialidosis	0	C0268233
galactosialidosis	CTSA	p.gly474ser	NA	ClinVar/OMIM	galactosialidosis	0	C0268233
knobloch syndrome	COL18A1	p.arg217his	NA	ClinVar/OMIM	knobloch syndrome	0	C1849409
knobloch syndrome	COL18A1	p.val385met	NA	ClinVar/OMIM	knobloch syndrome	0	C1849409
knobloch syndrome	COL18A1	p.ala388=	NA	ClinVar/OMIM	knobloch syndrome	0	C1849409
knobloch syndrome	COL18A1	p.arg439leu	NA	ClinVar/OMIM	knobloch syndrome	0	C1849409
knobloch syndrome	COL18A1	p.glu440asp	NA	ClinVar/OMIM	knobloch syndrome	0	C1849409
knobloch syndrome	COL18A1	p.arg512=	NA	ClinVar/OMIM	knobloch syndrome	0	C1849409
knobloch syndrome	COL18A1	p.arg533=	NA	ClinVar/OMIM	knobloch syndrome	0	C1849409
knobloch syndrome	COL18A1	p.gly615=	NA	ClinVar/OMIM	knobloch syndrome	0	C1849409
knobloch syndrome	COL18A1	p.arg707=	NA	ClinVar/OMIM	knobloch syndrome	0	C1849409
knobloch syndrome	COL18A1	p.val826=	NA	ClinVar/OMIM	knobloch syndrome	0	C1849409
knobloch syndrome	COL18A1	p.pro842=	NA	ClinVar/OMIM	knobloch syndrome	0	C1849409
knobloch syndrome	COL18A1	p.arg863=	NA	ClinVar/OMIM	knobloch syndrome	0	C1849409
knobloch syndrome	COL18A1	p.arg990gln	NA	ClinVar/OMIM	knobloch syndrome	0	C1849409
knobloch syndrome	COL18A1	p.pro1058ser	NA	ClinVar/OMIM	knobloch syndrome	0	C1849409
knobloch syndrome	COL18A1	p.gly1110ser	NA	ClinVar/OMIM	knobloch syndrome	0	C1849409
knobloch syndrome	COL18A1	p.pro1121=	NA	ClinVar/OMIM	knobloch syndrome	0	C1849409
knobloch syndrome	COL18A1	p.pro1124=	NA	ClinVar/OMIM	knobloch syndrome	0	C1849409
knobloch syndrome	COL18A1	p.pro1163ser	NA	ClinVar/OMIM	knobloch syndrome	0	C1849409
knobloch syndrome	COL18A1	p.gly1187=	NA	ClinVar/OMIM	knobloch syndrome	0	C1849409
knobloch syndrome	COL18A1	p.pro1257=	NA	ClinVar/OMIM	knobloch syndrome	0	C1849409
knobloch syndrome	COL18A1	p.ala1300thr	NA	ClinVar/OMIM	knobloch syndrome	0	C1849409
knobloch syndrome	COL18A1	p.asp1363=	NA	ClinVar/OMIM	knobloch syndrome	0	C1849409
knobloch syndrome	COL18A1	p.ala1397thr	NA	ClinVar/OMIM	knobloch syndrome	0	C1849409
knobloch syndrome	COL18A1	p.arg1432=	NA	ClinVar/OMIM	knobloch syndrome	0	C1849409
knobloch syndrome	COL18A1	p.asp1440asn	NA	ClinVar/OMIM	knobloch syndrome	0	C1849409
knobloch syndrome	COL18A1	p.gly1455cys	NA	ClinVar/OMIM	knobloch syndrome	0	C1849409
bruck syndrome	PLOD2	p.asp102glu	NA	ClinVar/OMIM	bruck syndrome	0	C0432253
bruck syndrome	PLOD2	p.lys486arg	NA	ClinVar/OMIM	bruck syndrome	0	C0432253
familial encephalopathy with neuroserpin inclusion bodies	SERPINI1	p.ala54val	NA	ClinVar/OMIM	familial encephalopathy with neuroserpin inclusion bodies	0	C1858680
familial encephalopathy with neuroserpin inclusion bodies	SERPINI1	p.ala135val	NA	ClinVar/OMIM	familial encephalopathy with neuroserpin inclusion bodies	0	C1858680
familial encephalopathy with neuroserpin inclusion bodies	SERPINI1	p.asn137ser	NA	ClinVar/OMIM	familial encephalopathy with neuroserpin inclusion bodies	0	C1858680
familial encephalopathy with neuroserpin inclusion bodies	SERPINI1	p.ala320gly	NA	ClinVar/OMIM	familial encephalopathy with neuroserpin inclusion bodies	0	C1858680
mucopolysaccharidosis, type ix	HYAL1	p.arg431gln	NA	ClinVar/OMIM	mucopolysaccharidosis, type ix	0	C1291490
mucopolysaccharidosis, type ix	HYAL1	p.pro282=	NA	ClinVar/OMIM	mucopolysaccharidosis, type ix	0	C1291490
mucopolysaccharidosis, type ix	HYAL1	p.tyr210=	NA	ClinVar/OMIM	mucopolysaccharidosis, type ix	0	C1291490
robinow syndrome	WNT5A	p.thr328met	NA	ClinVar/OMIM	robinow syndrome	0	C0265205
robinow syndrome	WNT5A	p.thr229ala	NA	ClinVar/OMIM	robinow syndrome	0	C0265205
robinow syndrome	WNT5A	p.leu14ser	NA	ClinVar/OMIM	robinow syndrome	0	C0265205
renal hypomagnesemia, recessive	EGF	p.tyr696=	NA	ClinVar/OMIM	renal hypomagnesemia, recessive	0	0
renal hypomagnesemia, recessive	EGF	p.pro705=	NA	ClinVar/OMIM	renal hypomagnesemia, recessive	0	0
renal hypomagnesemia, recessive	EGF	p.asp914=	NA	ClinVar/OMIM	renal hypomagnesemia, recessive	0	0
renal hypomagnesemia, recessive	EGF	p.gly919arg	NA	ClinVar/OMIM	renal hypomagnesemia, recessive	0	0
renal hypomagnesemia, recessive	EGF	p.ala1025ser	NA	ClinVar/OMIM	renal hypomagnesemia, recessive	0	0
renal hypomagnesemia, recessive	EGF	p.ala1037val	NA	ClinVar/OMIM	renal hypomagnesemia, recessive	0	0
renal hypomagnesemia, recessive	EGF	p.ala1054=	NA	ClinVar/OMIM	renal hypomagnesemia, recessive	0	0
renal hypomagnesemia, recessive	EGF	p.gly1116cys	NA	ClinVar/OMIM	renal hypomagnesemia, recessive	0	0
renal hypomagnesemia, recessive	EGF	p.gln1136fs	NA	ClinVar/OMIM	renal hypomagnesemia, recessive	0	0
renal hypomagnesemia, recessive	EGF	p.his606=	NA	ClinVar/OMIM	renal hypomagnesemia, recessive	0	0
renal hypomagnesemia, recessive	EGF	p.cys380=	NA	ClinVar/OMIM	renal hypomagnesemia, recessive	0	0
renal hypomagnesemia, recessive	EGF	p.asp186his	NA	ClinVar/OMIM	renal hypomagnesemia, recessive	0	0
congenital afibrinogenemia	FGG	p.gly429trp	NA	ClinVar/OMIM	congenital afibrinogenemia	0	C2584774
congenital afibrinogenemia	FGG	p.ile413val	NA	ClinVar/OMIM	congenital afibrinogenemia	0	C2584774
congenital afibrinogenemia	FGG	p.thr168ala	NA	ClinVar/OMIM	congenital afibrinogenemia	0	C2584774
congenital afibrinogenemia	FGG	p.pro7ser	NA	ClinVar/OMIM	congenital afibrinogenemia	0	C2584774
diaphanospondylodysostosis	BMPER	p.pro85leu	NA	ClinVar/OMIM	diaphanospondylodysostosis	0	C1842691
diaphanospondylodysostosis	BMPER	p.pro124=	NA	ClinVar/OMIM	diaphanospondylodysostosis	0	C1842691
diaphanospondylodysostosis	BMPER	p.gly136ser	NA	ClinVar/OMIM	diaphanospondylodysostosis	0	C1842691
diaphanospondylodysostosis	BMPER	p.cys286phe	NA	ClinVar/OMIM	diaphanospondylodysostosis	0	C1842691
diaphanospondylodysostosis	BMPER	p.gln335lys	NA	ClinVar/OMIM	diaphanospondylodysostosis	0	C1842691
diaphanospondylodysostosis	BMPER	p.val403met	NA	ClinVar/OMIM	diaphanospondylodysostosis	0	C1842691
diaphanospondylodysostosis	BMPER	p.asn441=	NA	ClinVar/OMIM	diaphanospondylodysostosis	0	C1842691
diaphanospondylodysostosis	BMPER	p.val575ala	NA	ClinVar/OMIM	diaphanospondylodysostosis	0	C1842691
diaphanospondylodysostosis	BMPER	p.ile643phe	NA	ClinVar/OMIM	diaphanospondylodysostosis	0	C1842691
diaphanospondylodysostosis	BMPER	p.thr645=	NA	ClinVar/OMIM	diaphanospondylodysostosis	0	C1842691
nonsyndromic hearing loss, mixed	HGF	p.tyr635cys	NA	ClinVar/OMIM	nonsyndromic hearing loss, mixed	0	C3711374	C
nonsyndromic hearing loss, mixed	HGF	p.tyr572cys	NA	ClinVar/OMIM	nonsyndromic hearing loss, mixed	0	C3711374	C
nonsyndromic hearing loss, mixed	HGF	p.gln307his	NA	ClinVar/OMIM	nonsyndromic hearing loss, mixed	0	C3711374	C
nonsyndromic hearing loss, mixed	HGF	p.pro267leu	NA	ClinVar/OMIM	nonsyndromic hearing loss, mixed	0	C3711374	C
nonsyndromic hearing loss, mixed	HGF	p.gly146=	NA	ClinVar/OMIM	nonsyndromic hearing loss, mixed	0	C3711374	C
nonsyndromic hearing loss, mixed	HGF	p.thr49=	NA	ClinVar/OMIM	nonsyndromic hearing loss, mixed	0	C3711374	C
nonsyndromic hearing loss, mixed	HGF	p.trp2arg	NA	ClinVar/OMIM	nonsyndromic hearing loss, mixed	0	C3711374	C
klippel-feil syndrome	GDF6	p.asp411=	NA	ClinVar/OMIM	klippel-feil syndrome	0	C1861689;C2751307;C0022738
klippel-feil syndrome	GDF6	p.ala319=	NA	ClinVar/OMIM	klippel-feil syndrome	0	C1861689;C2751307;C0022738
klippel-feil syndrome	GDF6	p.phe290=	NA	ClinVar/OMIM	klippel-feil syndrome	0	C1861689;C2751307;C0022738
klippel-feil syndrome	GDF6	p.pro257leu	NA	ClinVar/OMIM	klippel-feil syndrome	0	C1861689;C2751307;C0022738
klippel-feil syndrome	GDF6	p.arg248ser	NA	ClinVar/OMIM	klippel-feil syndrome	0	C1861689;C2751307;C0022738
klippel-feil syndrome	GDF6	p.ala247=	NA	ClinVar/OMIM	klippel-feil syndrome	0	C1861689;C2751307;C0022738
klippel-feil syndrome	GDF6	p.arg167trp	NA	ClinVar/OMIM	klippel-feil syndrome	0	C1861689;C2751307;C0022738
manitoba oculotrichoanal syndrome	FREM1	p.val2152ile	NA	ClinVar/OMIM	manitoba oculotrichoanal syndrome	0	C1855425
manitoba oculotrichoanal syndrome	FREM1	p.lys2029arg	NA	ClinVar/OMIM	manitoba oculotrichoanal syndrome	0	C1855425
manitoba oculotrichoanal syndrome	FREM1	p.ser1972=	NA	ClinVar/OMIM	manitoba oculotrichoanal syndrome	0	C1855425
manitoba oculotrichoanal syndrome	FREM1	p.his1866tyr	NA	ClinVar/OMIM	manitoba oculotrichoanal syndrome	0	C1855425
manitoba oculotrichoanal syndrome	FREM1	p.ser1741phe	NA	ClinVar/OMIM	manitoba oculotrichoanal syndrome	0	C1855425
manitoba oculotrichoanal syndrome	FREM1	p.leu1641=	NA	ClinVar/OMIM	manitoba oculotrichoanal syndrome	0	C1855425
manitoba oculotrichoanal syndrome	FREM1	p.asp1585gly	NA	ClinVar/OMIM	manitoba oculotrichoanal syndrome	0	C1855425
manitoba oculotrichoanal syndrome	FREM1	p.thr1415ser	NA	ClinVar/OMIM	manitoba oculotrichoanal syndrome	0	C1855425
manitoba oculotrichoanal syndrome	FREM1	p.pro1334his	NA	ClinVar/OMIM	manitoba oculotrichoanal syndrome	0	C1855425
manitoba oculotrichoanal syndrome	FREM1	p.ile1302val	NA	ClinVar/OMIM	manitoba oculotrichoanal syndrome	0	C1855425
manitoba oculotrichoanal syndrome	FREM1	p.thr1291ser	NA	ClinVar/OMIM	manitoba oculotrichoanal syndrome	0	C1855425
manitoba oculotrichoanal syndrome	FREM1	p.val1268phe	NA	ClinVar/OMIM	manitoba oculotrichoanal syndrome	0	C1855425
manitoba oculotrichoanal syndrome	FREM1	p.arg940gly	NA	ClinVar/OMIM	manitoba oculotrichoanal syndrome	0	C1855425
manitoba oculotrichoanal syndrome	FREM1	p.val929leu	NA	ClinVar/OMIM	manitoba oculotrichoanal syndrome	0	C1855425
manitoba oculotrichoanal syndrome	FREM1	p.ser705gly	NA	ClinVar/OMIM	manitoba oculotrichoanal syndrome	0	C1855425
manitoba oculotrichoanal syndrome	FREM1	p.ile605met	NA	ClinVar/OMIM	manitoba oculotrichoanal syndrome	0	C1855425
manitoba oculotrichoanal syndrome	FREM1	p.pro373=	NA	ClinVar/OMIM	manitoba oculotrichoanal syndrome	0	C1855425
manitoba oculotrichoanal syndrome	FREM1	p.pro295leu	NA	ClinVar/OMIM	manitoba oculotrichoanal syndrome	0	C1855425
manitoba oculotrichoanal syndrome	FREM1	p.gln202arg	NA	ClinVar/OMIM	manitoba oculotrichoanal syndrome	0	C1855425
manitoba oculotrichoanal syndrome	FREM1	p.his185tyr	NA	ClinVar/OMIM	manitoba oculotrichoanal syndrome	0	C1855425
manitoba oculotrichoanal syndrome	FREM1	p.thr172=	NA	ClinVar/OMIM	manitoba oculotrichoanal syndrome	0	C1855425
manitoba oculotrichoanal syndrome	FREM1	p.leu108=	NA	ClinVar/OMIM	manitoba oculotrichoanal syndrome	0	C1855425
manitoba oculotrichoanal syndrome	FREM1	p.val34leu	NA	ClinVar/OMIM	manitoba oculotrichoanal syndrome	0	C1855425
manitoba oculotrichoanal syndrome	FREM1	p.thr24ala	NA	ClinVar/OMIM	manitoba oculotrichoanal syndrome	0	C1855425
manitoba oculotrichoanal syndrome	FREM1	p.ser3phe	NA	ClinVar/OMIM	manitoba oculotrichoanal syndrome	0	C1855425
ovarian dysgenesis	BMP15	p.his200tyr	NA	ClinVar/OMIM	ovarian dysgenesis	0	C0342510
junctional epidermolysis bullosa gravis of herlitz	LAMA3	p.arg2735ter	NA	ClinVar/OMIM	junctional epidermolysis bullosa gravis of herlitz	0	C0079683
junctional epidermolysis bullosa gravis of herlitz	LAMA3	p.val2169fs	NA	ClinVar/OMIM	junctional epidermolysis bullosa gravis of herlitz	0	C0079683
junctional epidermolysis bullosa gravis of herlitz	LAMA3	p.gly2560fs	NA	ClinVar/OMIM	junctional epidermolysis bullosa gravis of herlitz	0	C0079683
junctional epidermolysis bullosa gravis of herlitz	LAMA3	p.glu1993_ala1994inster	NA	ClinVar/OMIM	junctional epidermolysis bullosa gravis of herlitz	0	C0079683
junctional epidermolysis bullosa gravis of herlitz	LAMA3	p.cys1684fs	NA	ClinVar/OMIM	junctional epidermolysis bullosa gravis of herlitz	0	C0079683
junctional epidermolysis bullosa gravis of herlitz	LAMA3	p.trp2812ter	NA	ClinVar/OMIM	junctional epidermolysis bullosa gravis of herlitz	0	C0079683
junctional epidermolysis bullosa gravis of herlitz	LAMA3	p.lys2236fs	NA	ClinVar/OMIM	junctional epidermolysis bullosa gravis of herlitz	0	C0079683
junctional epidermolysis bullosa gravis of herlitz	LAMA3	p.asp2991fs	NA	ClinVar/OMIM	junctional epidermolysis bullosa gravis of herlitz	0	C0079683
junctional epidermolysis bullosa gravis of herlitz	LAMA3	p.cys1718fs	NA	ClinVar/OMIM	junctional epidermolysis bullosa gravis of herlitz	0	C0079683
junctional epidermolysis bullosa gravis of herlitz	LAMA3	p.asp1897ter	NA	ClinVar/OMIM	junctional epidermolysis bullosa gravis of herlitz	0	C0079683
junctional epidermolysis bullosa gravis of herlitz	LAMA3	p.cys1736fs	NA	ClinVar/OMIM	junctional epidermolysis bullosa gravis of herlitz	0	C0079683
junctional epidermolysis bullosa gravis of herlitz	LAMA3	p.thr3192fs	NA	ClinVar/OMIM	junctional epidermolysis bullosa gravis of herlitz	0	C0079683
dilatation	ELN	p.ala260dup	NA	ClinVar/OMIM	dilatation	0	C0012359;C1322279;C0002940;C0700124
anterior segment dysgenesis 8	CPAMD8	p.ser1404pro	NA	ClinVar/OMIM	anterior segment dysgenesis 8	0	C4310622
angioedema	COL4A1	p.gly743val	NA	ClinVar/OMIM	angioedema	0	C0002994
left-right axis malformations	LEFTY2	p.met346leu	NA	ClinVar/OMIM	left-right axis malformations	0	C1866091
left-right axis malformations	LEFTY2	p.thr336ser	NA	ClinVar/OMIM	left-right axis malformations	0	C1866091
holt-oram syndrome	TGFB2	p.ala306=	NA	ClinVar/OMIM	holt-oram syndrome	0	C1623209;C0265264
epilepsy, lateral temporal lobe, autosomal dominant	LGI1	p.asp104asn	NA	ClinVar/OMIM	epilepsy, lateral temporal lobe, autosomal dominant	0	C1838062
left-right axis malformations	LEFTY2	p.ser38=	NA	ClinVar/OMIM	left-right axis malformations	0	C1866091
spondylometaphyseal dysplasia, corner fracture type	FN1	p.cys87phe	NA	ClinVar/OMIM	spondylometaphyseal dysplasia, corner fracture type	0	C0432221
spondylometaphyseal dysplasia, corner fracture type	FN1	p.cys123arg	NA	ClinVar/OMIM	spondylometaphyseal dysplasia, corner fracture type	0	C0432221
spondylometaphyseal dysplasia	FN1	p.cys225trp	NA	ClinVar/OMIM	spondylometaphyseal dysplasia	0	C4759767;C0700635
spondylometaphyseal dysplasia, corner fracture type	FN1	p.tyr240asp	NA	ClinVar/OMIM	spondylometaphyseal dysplasia, corner fracture type	0	C0432221
spondylometaphyseal dysplasia	FN1	p.cys260gly	NA	ClinVar/OMIM	spondylometaphyseal dysplasia	0	C4759767;C0700635
familial hematuria	COL4A5	p.asp654tyr	NA	ClinVar/OMIM	familial hematuria	0	C1305904
hypogonadotropic hypogonadism 1 with or without anosmia (kallmann syndrome 1)	KAL1	p.ser141asn	NA	ClinVar/OMIM	hypogonadotropic hypogonadism 1 with or without anosmia	0	C0162809;C1563719;C4016502
porencephaly 1	COL4A1	p.gly693glu	NA	ClinVar/OMIM	porencephaly 1	0	C1867983
short stature and advanced bone age, with early-onset osteoarthritis and osteochondritis dissecans	ACAN	p.leu2355pro	NA	ClinVar/OMIM	short stature and advanced bone age, with early-onset osteoarthritis and osteochondritis dissecans	0	C4540540	C
short stature and advanced bone age, with early-onset osteoarthritis	ACAN	p.glu1553ter	NA	ClinVar/OMIM	short stature and advanced bone age, with early-onset osteoarthritis	0	C4540542	C
short stature and advanced bone age, with early-onset osteoarthritis	ACAN	p.trp75arg	NA	ClinVar/OMIM	short stature and advanced bone age, with early-onset osteoarthritis	0	C4540542	C
short stature and advanced bone age, with early-onset osteoarthritis	ACAN	p.trp2401ter	NA	ClinVar/OMIM	short stature and advanced bone age, with early-onset osteoarthritis	0	C4540542	C
short stature and advanced bone age, with early-onset osteoarthritis and osteochondritis dissecans	ACAN	p.gln2364ter	NA	ClinVar/OMIM	short stature and advanced bone age, with early-onset osteoarthritis and osteochondritis dissecans	0	C4540540	C
cutis laxa syndrome	LTBP4	p.ala920pro	NA	ClinVar/OMIM	cutis laxa syndrome	0	C0268351;C4016894;C3280798
hypertension	COL5A2	p.asn106asp	NA	ClinVar/OMIM	hypertension	0	C4015866;C0020538	C
geleophysic dysplasia 3	LTBP3	p.ser696cys	NA	ClinVar/OMIM	geleophysic dysplasia 3	0	C4540511
hypohidrotic x-linked ectodermal dysplasia	EDA	p.pro188fs	NA	ClinVar/OMIM	hypohidrotic x-linked ectodermal dysplasia	0	C0162359;C3539920
ehlers-danlos syndrome, classic type	COL5A2	p.pro706leu	NA	ClinVar/OMIM	ehlers-danlos syndrome, classic type	0	C4225429	A
ehlers-danlos syndrome, classic type	COL5A2	p.asp955asn	NA	ClinVar/OMIM	ehlers-danlos syndrome, classic type	0	C4225429	A
ehlers-danlos syndrome, classic type	COL5A2	p.pro1220ser	NA	ClinVar/OMIM	ehlers-danlos syndrome, classic type	0	C4225429	A
epilepsy, lateral temporal lobe, autosomal dominant	LGI1	p.arg407his	NA	ClinVar/OMIM	epilepsy, lateral temporal lobe, autosomal dominant	0	C1838062
holoprosencephaly 3	SHH	p.glu284fs	NA	ClinVar/OMIM	holoprosencephaly 3	0	C0079541;C1840529
erythrocytosis, familial, 3	EGLN1	p.gly135=	NA	ClinVar/OMIM	erythrocytosis, familial, 3	0	C1853286
encephalopathy, familial, with neuroserpin inclusion bodies	SERPINI1	p.arg36cys	NA	ClinVar/OMIM	encephalopathy, familial, with neuroserpin inclusion bodies	0	C1858680
endplate acetylcholinesterase deficiency	COLQ	p.leu53fs	NA	ClinVar/OMIM	endplate acetylcholinesterase deficiency	0	C1864233
left-right axis malformations	LEFTY2	p.ala358=	NA	ClinVar/OMIM	left-right axis malformations	0	C1866091
left-right axis malformations	LEFTY2	p.gly102arg	NA	ClinVar/OMIM	left-right axis malformations	0	C1866091
left-right axis malformations	LEFTY2	p.thr23=	NA	ClinVar/OMIM	left-right axis malformations	0	C1866091
pierson syndrome	LAMB2	p.arg1592fs	NA	ClinVar/OMIM	pierson syndrome	0	C1836876
inflammatory bowel disease, immunodeficiency, and encephalopathy	TGFB1	p.arg110cys	NA	ClinVar/OMIM	inflammatory bowel disease, immunodeficiency, and encephalopathy	0	C0021390	C
short stature, facial dysmorphism, and skeletal anomalies without cardiac anomalies	BMP2	p.glu27ter	NA	ClinVar/OMIM	short stature, facial dysmorphism, and skeletal anomalies without cardiac anomalies	0	C0349588;C0013336
short stature, facial dysmorphism, and skeletal anomalies with cardiac anomalies	BMP2	p.tyr320fs	NA	ClinVar/OMIM	short stature, facial dysmorphism, and skeletal anomalies with cardiac anomalies	0	C0349588;C0013336
short stature, facial dysmorphism, and skeletal anomalies with cardiac anomalies	BMP2	p.cys329ter	NA	ClinVar/OMIM	short stature, facial dysmorphism, and skeletal anomalies with cardiac anomalies	0	C0349588;C0013336
weill-marchesani syndrome 4	ADAMTS17	p.asp218fs	NA	ClinVar/OMIM	weill-marchesani syndrome 4	0	C2750787
multiple synostoses syndrome 4	GDF6	p.ser429arg	NA	ClinVar/OMIM	multiple synostoses syndrome 4	0	C4693531
multiple synostoses syndrome 4	GDF6	p.tyr444asn	NA	ClinVar/OMIM	multiple synostoses syndrome 4	0	C4693531
loeys-dietz syndrome 4	TGFB2	p.arg320cys	NA	ClinVar/OMIM	loeys-dietz syndrome 4	0	C3553762
erythrocytosis, familial, 5	EPO	p.pro7fs	NA	ClinVar/OMIM	erythrocytosis, familial, 5	0	C0152264
diamond-blackfan anemia-like (1 family)	EPO	p.arg177gln	NA	ClinVar/OMIM	diamond-blackfan anemia-like	0	C1260899;C0265265
hereditary pancreatitis	PRSS1	p.asp218tyr	NA	ClinVar/OMIM	hereditary pancreatitis	0	C0030305;C0238339
endplate acetylcholinesterase deficiency	COLQ	p.tyr363his	NA	ClinVar/OMIM	endplate acetylcholinesterase deficiency	0	C1864233
lissencephaly 2	RELN	p.tyr818cys	NA	ClinVar/OMIM	lissencephaly 2	0	C0796089	B
aneurysm	COL5A2	p.gly1092asp	NA	ClinVar/OMIM	aneurysm	0	C0002940
taad family history	COL5A2	p.gly270ser	NA	ClinVar/OMIM	taad family history	0	0
epileptic encephalopathy, early infantile, 61 (1 patient)	ADAM22	p.cys401tyr	NA	ClinVar/OMIM	epileptic encephalopathy, early infantile, 61	0	C4552072
hereditary disease	COL27A1	p.gly1021asp	NA	ClinVar/OMIM	hereditary disease	0	C0019247
hereditary disease	COL4A5	p.asp989_gly994del	NA	ClinVar/OMIM	hereditary disease	0	C0019247
hereditary disease	COL4A1	p.gly1023arg	NA	ClinVar/OMIM	hereditary disease	0	C0019247
hereditary disease	COL4A1	p.glu1167lys	NA	ClinVar/OMIM	hereditary disease	0	C0019247
hereditary disease	FGG	p.asp344asn	NA	ClinVar/OMIM	hereditary disease	0	C0019247
hereditary disease	COL27A1	p.gln1729ter	NA	ClinVar/OMIM	hereditary disease	0	C0019247
hereditary disease	TGFB2	p.leu77fs	NA	ClinVar/OMIM	hereditary disease	0	C0019247
hereditary disease	BDNF	p.glu176ter	NA	ClinVar/OMIM	hereditary disease	0	C0019247
hereditary disease	COL4A1	p.arg1661cys	NA	ClinVar/OMIM	hereditary disease	0	C0019247
hereditary disease	INSL3	p.arg50fs	NA	ClinVar/OMIM	hereditary disease	0	C0019247
hereditary disease	COL5A2	p.arg506ser	NA	ClinVar/OMIM	hereditary disease	0	C0019247
hereditary disease	COL4A1	p.gly1225glu	NA	ClinVar/OMIM	hereditary disease	0	C0019247
hereditary disease	COL4A1	p.gly1011glu	NA	ClinVar/OMIM	hereditary disease	0	C0019247
hereditary disease	COL4A1	p.gly1314glu	NA	ClinVar/OMIM	hereditary disease	0	C0019247
hereditary disease	COL4A1	p.ala1514thr	NA	ClinVar/OMIM	hereditary disease	0	C0019247
hereditary disease	LOX	p.asn51lys	NA	ClinVar/OMIM	hereditary disease	0	C0019247
hereditary disease	COL4A2	p.gly97glu	NA	ClinVar/OMIM	hereditary disease	0	C0019247
hereditary disease	ACAN	p.gln1952arg	NA	ClinVar/OMIM	hereditary disease	0	C0019247
hereditary disease	ACAN	p.glu2043ter	NA	ClinVar/OMIM	hereditary disease	0	C0019247
gdf11-associated multiple congenital anomalies and id	GDF11	p.tyr336ter	NA	ClinVar/OMIM	gdf11-associated multiple congenital anomalies and id	0	C1453137;C1415032;C4521418
delayed speech and language development	FGF12	p.gly112ser	NA	ClinVar/OMIM	delayed speech and language development	0	C0454644
junctional epidermolysis bullosa gravis of herlitz	LAMB3	p.ser448fs	NA	ClinVar/OMIM	junctional epidermolysis bullosa gravis of herlitz	0	C0079683
spinal deformities	COL5A2	p.gly252cys	NA	ClinVar/OMIM	spinal deformities	0	C0575157
joint hypermobility	COL4A2	p.gly184asp	NA	ClinVar/OMIM	joint hypermobility	0	C1844820;C0086437
seizures	LGI1	p.asp157val	NA	ClinVar/OMIM	seizures	0	C0036572	B
hematuria	COL4A5	p.ile1630fs	NA	ClinVar/OMIM	hematuria	0	C0018965
dental anomalies and short stature	LTBP3	p.pro45fs	NA	ClinVar/OMIM	dental anomalies and short stature	0	C1832594
dental anomalies and short stature	LTBP3	p.glu750ter	NA	ClinVar/OMIM	dental anomalies and short stature	0	C1832594
elder sister affected with geleophysic dysplasia	ADAMTSL2	p.ala165thr	NA	ClinVar/OMIM	elder sister affected with geleophysic dysplasia	0	0
ehlers-danlos syndrome, classic type	COL5A2	p.arg562his	NA	ClinVar/OMIM	ehlers-danlos syndrome, classic type	0	C4225429	A
ehlers-danlos syndrome, classic type	COL5A2	p.gly1008ser	NA	ClinVar/OMIM	ehlers-danlos syndrome, classic type	0	C4225429	A
verloes bourguignon syndrome	LTBP3	p.leu35del	NA	ClinVar/OMIM	verloes bourguignon syndrome	0	C1832594
epilepsy, lateral temporal lobe, autosomal dominant	LGI1	p.thr390delinslyster	NA	ClinVar/OMIM	epilepsy, lateral temporal lobe, autosomal dominant	0	C1838062
encephalopathy, familial, with neuroserpin inclusion bodies	SERPINI1	p.ile251val	NA	ClinVar/OMIM	encephalopathy, familial, with neuroserpin inclusion bodies	0	C1858680
left-right axis malformations	LEFTY2	p.arg265cys	NA	ClinVar/OMIM	left-right axis malformations	0	C1866091
left-right axis malformations	LEFTY2	p.pro18=	NA	ClinVar/OMIM	left-right axis malformations	0	C1866091
ehlers-danlos syndrome, classic-like, 2	AEBP1	p.cys581ter	NA	ClinVar/OMIM	ehlers-danlos syndrome, classic-like, 2	0	C1848029	A
brain arteriovenous malformation	TIMP3	p.leu104pro	NA	ClinVar/OMIM	brain arteriovenous malformation	0	C0917804
hpe spectrum	SHH	p.ser156arg	NA	ClinVar/OMIM	hpe spectrum	0	0
holoprosencephaly 3	SHH	p.pro347leu	NA	ClinVar/OMIM	holoprosencephaly 3	0	C0079541;C1840529
holoprosencephaly 3	SHH	p.ser436ter	NA	ClinVar/OMIM	holoprosencephaly 3	0	C0079541;C1840529
holoprosencephaly 3	SHH	p.leu266phe	NA	ClinVar/OMIM	holoprosencephaly 3	0	C0079541;C1840529
single median maxillary central incisor	SHH	p.gly210asp	NA	ClinVar/OMIM	single median maxillary central incisor	0	C1840235
holoprosencephaly 3	SHH	p.arg72ter	NA	ClinVar/OMIM	holoprosencephaly 3	0	C0079541;C1840529
endplate acetylcholinesterase deficiency	COLQ	p.ala271val	NA	ClinVar/OMIM	endplate acetylcholinesterase deficiency	0	C1864233
lissencephaly 2	RELN	p.ile650phe	NA	ClinVar/OMIM	lissencephaly 2	0	C0796089	B
keipert syndrome	GPC4	p.val235fs	NA	ClinVar/OMIM	keipert syndrome	0	C1850627
keipert syndrome	GPC4	p.asp106fs	NA	ClinVar/OMIM	keipert syndrome	0	C1850627
connective tissue disorder	COL5A2	p.pro553arg	NA	ClinVar/OMIM	connective tissue disorder	0	C2676285;C0009782
connective tissue disorder	COL5A2	p.ala770ser	NA	ClinVar/OMIM	connective tissue disorder	0	C2676285;C0009782
junctional epidermolysis bullosa gravis of herlitz	LAMA3	p.val1047fs	NA	ClinVar/OMIM	junctional epidermolysis bullosa gravis of herlitz	0	C0079683
junctional epidermolysis bullosa gravis of herlitz	LAMA3	p.glu1605del	NA	ClinVar/OMIM	junctional epidermolysis bullosa gravis of herlitz	0	C0079683
junctional epidermolysis bullosa gravis of herlitz	LAMA3	p.gln2014fs	NA	ClinVar/OMIM	junctional epidermolysis bullosa gravis of herlitz	0	C0079683
junctional epidermolysis bullosa gravis of herlitz	LAMA3	p.glu1401ter	NA	ClinVar/OMIM	junctional epidermolysis bullosa gravis of herlitz	0	C0079683
junctional epidermolysis bullosa gravis of herlitz	LAMA3	p.gln1507ter	NA	ClinVar/OMIM	junctional epidermolysis bullosa gravis of herlitz	0	C0079683
junctional epidermolysis bullosa gravis of herlitz	LAMA3	p.ser1741gly	NA	ClinVar/OMIM	junctional epidermolysis bullosa gravis of herlitz	0	C0079683
junctional epidermolysis bullosa gravis of herlitz	LAMA3	p.ser3200_gln3201insarg	NA	ClinVar/OMIM	junctional epidermolysis bullosa gravis of herlitz	0	C0079683
junctional epidermolysis bullosa gravis of herlitz	LAMA3	p.ala1733fs	NA	ClinVar/OMIM	junctional epidermolysis bullosa gravis of herlitz	0	C0079683
junctional epidermolysis bullosa gravis of herlitz	LAMB3	p.ser800fs	NA	ClinVar/OMIM	junctional epidermolysis bullosa gravis of herlitz	0	C0079683
junctional epidermolysis bullosa gravis of herlitz	LAMA3	p.leu3327fs	NA	ClinVar/OMIM	junctional epidermolysis bullosa gravis of herlitz	0	C0079683
junctional epidermolysis bullosa gravis of herlitz	LAMA3	p.tyr1127ter	NA	ClinVar/OMIM	junctional epidermolysis bullosa gravis of herlitz	0	C0079683
junctional epidermolysis bullosa gravis of herlitz	LAMA3	p.ser3059fs	NA	ClinVar/OMIM	junctional epidermolysis bullosa gravis of herlitz	0	C0079683
junctional epidermolysis bullosa gravis of herlitz	LAMA3	p.ala2178del	NA	ClinVar/OMIM	junctional epidermolysis bullosa gravis of herlitz	0	C0079683
junctional epidermolysis bullosa gravis of herlitz	LAMA3	p.ser2089ter	NA	ClinVar/OMIM	junctional epidermolysis bullosa gravis of herlitz	0	C0079683
junctional epidermolysis bullosa gravis of herlitz	LAMA3	p.tyr962ter	NA	ClinVar/OMIM	junctional epidermolysis bullosa gravis of herlitz	0	C0079683
junctional epidermolysis bullosa gravis of herlitz	LAMA3	p.arg1059ter	NA	ClinVar/OMIM	junctional epidermolysis bullosa gravis of herlitz	0	C0079683
junctional epidermolysis bullosa gravis of herlitz	LAMA3	p.gln1619ter	NA	ClinVar/OMIM	junctional epidermolysis bullosa gravis of herlitz	0	C0079683
junctional epidermolysis bullosa gravis of herlitz	LAMA3	p.arg2965fs	NA	ClinVar/OMIM	junctional epidermolysis bullosa gravis of herlitz	0	C0079683
junctional epidermolysis bullosa gravis of herlitz	LAMA3	p.gln1928ter	NA	ClinVar/OMIM	junctional epidermolysis bullosa gravis of herlitz	0	C0079683
junctional epidermolysis bullosa gravis of herlitz	LAMA3	p.glu352ter	NA	ClinVar/OMIM	junctional epidermolysis bullosa gravis of herlitz	0	C0079683
junctional epidermolysis bullosa gravis of herlitz	LAMA3	p.trp537ter	NA	ClinVar/OMIM	junctional epidermolysis bullosa gravis of herlitz	0	C0079683
junctional epidermolysis bullosa gravis of herlitz	LAMA3	p.cys1392fs	NA	ClinVar/OMIM	junctional epidermolysis bullosa gravis of herlitz	0	C0079683
junctional epidermolysis bullosa gravis of herlitz	LAMA3	p.arg2943fs	NA	ClinVar/OMIM	junctional epidermolysis bullosa gravis of herlitz	0	C0079683
junctional epidermolysis bullosa gravis of herlitz	LAMA3	p.arg1126ter	NA	ClinVar/OMIM	junctional epidermolysis bullosa gravis of herlitz	0	C0079683
junctional epidermolysis bullosa gravis of herlitz	LAMA3	p.leu195ter	NA	ClinVar/OMIM	junctional epidermolysis bullosa gravis of herlitz	0	C0079683
junctional epidermolysis bullosa gravis of herlitz	LAMA3	p.trp2764ter	NA	ClinVar/OMIM	junctional epidermolysis bullosa gravis of herlitz	0	C0079683
junctional epidermolysis bullosa gravis of herlitz	LAMA3	p.glu306ter	NA	ClinVar/OMIM	junctional epidermolysis bullosa gravis of herlitz	0	C0079683
junctional epidermolysis bullosa gravis of herlitz	LAMA3	p.trp2694ter	NA	ClinVar/OMIM	junctional epidermolysis bullosa gravis of herlitz	0	C0079683
junctional epidermolysis bullosa gravis of herlitz	LAMB3	p.asn487dup	NA	ClinVar/OMIM	junctional epidermolysis bullosa gravis of herlitz	0	C0079683
junctional epidermolysis bullosa gravis of herlitz	LAMA3	p.lys2352ter	NA	ClinVar/OMIM	junctional epidermolysis bullosa gravis of herlitz	0	C0079683
junctional epidermolysis bullosa gravis of herlitz	LAMA3	p.gly1691dup	NA	ClinVar/OMIM	junctional epidermolysis bullosa gravis of herlitz	0	C0079683
junctional epidermolysis bullosa gravis of herlitz	LAMA3	p.gly2607fs	NA	ClinVar/OMIM	junctional epidermolysis bullosa gravis of herlitz	0	C0079683
junctional epidermolysis bullosa gravis of herlitz	LAMA3	p.gly3283fs	NA	ClinVar/OMIM	junctional epidermolysis bullosa gravis of herlitz	0	C0079683
lama3-related disorders	LAMA3	p.arg2610ter	NA	ClinVar/OMIM	lama3-related disorders	0	C4521467;C1416777;C1416778
junctional epidermolysis bullosa gravis of herlitz	LAMA3	p.asn2701fs	NA	ClinVar/OMIM	junctional epidermolysis bullosa gravis of herlitz	0	C0079683
junctional epidermolysis bullosa gravis of herlitz	LAMA3	p.gln2077_ser2078inster	NA	ClinVar/OMIM	junctional epidermolysis bullosa gravis of herlitz	0	C0079683
junctional epidermolysis bullosa gravis of herlitz	LAMA3	p.glu1637fs	NA	ClinVar/OMIM	junctional epidermolysis bullosa gravis of herlitz	0	C0079683
junctional epidermolysis bullosa gravis of herlitz	LAMA3	p.tyr2448fs	NA	ClinVar/OMIM	junctional epidermolysis bullosa gravis of herlitz	0	C0079683
junctional epidermolysis bullosa gravis of herlitz	LAMA3	p.thr3099del	NA	ClinVar/OMIM	junctional epidermolysis bullosa gravis of herlitz	0	C0079683
edsderms	ADAMTS2	p.lys547ter	NA	ClinVar/OMIM	edsderms	0	C2700425
junctional epidermolysis bullosa gravis of herlitz	LAMA3	p.val2389fs	NA	ClinVar/OMIM	junctional epidermolysis bullosa gravis of herlitz	0	C0079683
junctional epidermolysis bullosa gravis of herlitz	LAMA3	p.val2126fs	NA	ClinVar/OMIM	junctional epidermolysis bullosa gravis of herlitz	0	C0079683
junctional epidermolysis bullosa gravis of herlitz	LAMA3	p.lys2876fs	NA	ClinVar/OMIM	junctional epidermolysis bullosa gravis of herlitz	0	C0079683
junctional epidermolysis bullosa gravis of herlitz	LAMA3	p.leu2929ter	NA	ClinVar/OMIM	junctional epidermolysis bullosa gravis of herlitz	0	C0079683
junctional epidermolysis bullosa gravis of herlitz	LAMA3	p.tyr3038ter	NA	ClinVar/OMIM	junctional epidermolysis bullosa gravis of herlitz	0	C0079683
junctional epidermolysis bullosa gravis of herlitz	LAMA3	p.tyr956ter	NA	ClinVar/OMIM	junctional epidermolysis bullosa gravis of herlitz	0	C0079683
junctional epidermolysis bullosa gravis of herlitz	LAMA3	p.gln2497ter	NA	ClinVar/OMIM	junctional epidermolysis bullosa gravis of herlitz	0	C0079683
junctional epidermolysis bullosa gravis of herlitz	LAMA3	p.met2451fs	NA	ClinVar/OMIM	junctional epidermolysis bullosa gravis of herlitz	0	C0079683
junctional epidermolysis bullosa gravis of herlitz	LAMA3	p.gly2669fs	NA	ClinVar/OMIM	junctional epidermolysis bullosa gravis of herlitz	0	C0079683
junctional epidermolysis bullosa gravis of herlitz	LAMA3	p.phe2892fs	NA	ClinVar/OMIM	junctional epidermolysis bullosa gravis of herlitz	0	C0079683
junctional epidermolysis bullosa gravis of herlitz	LAMA3	p.leu2407fs	NA	ClinVar/OMIM	junctional epidermolysis bullosa gravis of herlitz	0	C0079683
junctional epidermolysis bullosa gravis of herlitz	LAMA3	p.trp3068fs	NA	ClinVar/OMIM	junctional epidermolysis bullosa gravis of herlitz	0	C0079683
junctional epidermolysis bullosa gravis of herlitz	LAMA3	p.glu2158ter	NA	ClinVar/OMIM	junctional epidermolysis bullosa gravis of herlitz	0	C0079683
junctional epidermolysis bullosa gravis of herlitz	LAMA3	p.gln1666ter	NA	ClinVar/OMIM	junctional epidermolysis bullosa gravis of herlitz	0	C0079683
junctional epidermolysis bullosa gravis of herlitz	LAMA3	p.asp3134fs	NA	ClinVar/OMIM	junctional epidermolysis bullosa gravis of herlitz	0	C0079683
junctional epidermolysis bullosa gravis of herlitz	LAMA3	p.cys1312ter	NA	ClinVar/OMIM	junctional epidermolysis bullosa gravis of herlitz	0	C0079683
junctional epidermolysis bullosa gravis of herlitz	LAMA3	p.thr1865fs	NA	ClinVar/OMIM	junctional epidermolysis bullosa gravis of herlitz	0	C0079683
junctional epidermolysis bullosa gravis of herlitz	LAMC2	p.asp61ter	NA	ClinVar/OMIM	junctional epidermolysis bullosa gravis of herlitz	0	C0079683
diaphanospondylodysostosis	BMPER	p.val137asp	NA	ClinVar/OMIM	diaphanospondylodysostosis	0	C1842691
deafness	TECTA	p.cys912ter	NA	ClinVar/OMIM	deafness	0	C1832978;C0011053
ehlers-danlos syndrome, classic type	COL5A2	p.ile127leu	NA	ClinVar/OMIM	ehlers-danlos syndrome, classic type	0	C4225429	A
split hand-foot malformation	WNT10B	p.asn232del	NA	ClinVar/OMIM	split hand-foot malformation	0	C0221373
fraser syndrome	FRAS1	p.trp172ter	NA	ClinVar/OMIM	fraser syndrome	0	C0265233	A
macular dystrophy	IMPG2	p.gly304asp	NA	ClinVar/OMIM	macular dystrophy	0	C1842914;C0242383
stickler syndrome, type i, nonsyndromic ocular	COL2A1	p.pro1046ser	NA	ClinVar/OMIM	stickler syndrome, type i, nonsyndromic ocular	0	C1836080;C0265253
bmp4-related syndromic microphthalmia	BMP4	p.arg280pro	NA	ClinVar/OMIM	bmp4-related syndromic microphthalmia	0	C1568257;C1412805;C0530979
ullrich congenital muscular dystrophy	COL12A1	p.arg265cys	NA	ClinVar/OMIM	ullrich congenital muscular dystrophy	0	C0410179	B
odontoonychodermal dysplasia	WNT10A	p.arg232fs	NA	ClinVar/OMIM	odontoonychodermal dysplasia	0	C0796093;C0013575
encephalopathy, familial, with neuroserpin inclusion bodies	SERPINI1	p.met391ile	NA	ClinVar/OMIM	encephalopathy, familial, with neuroserpin inclusion bodies	0	C1858680
encephalopathy, familial, with neuroserpin inclusion bodies	SERPINI1	p.his74arg	NA	ClinVar/OMIM	encephalopathy, familial, with neuroserpin inclusion bodies	0	C1858680
holt-oram syndrome	TGFB2	p.gly331fs	NA	ClinVar/OMIM	holt-oram syndrome	0	C1623209;C0265264
deficiency of hyaluronoglucosaminidase	HYAL1	p.glu45ter	NA	ClinVar/OMIM	deficiency of hyaluronoglucosaminidase	0	C1291490
autosomal dominant epilepsy with auditory features	LGI1	p.tyr489fs	NA	ClinVar/OMIM	autosomal dominant epilepsy with auditory features	0	C1838062
encephalopathy, familial, with neuroserpin inclusion bodies	SERPINI1	p.ser67tyr	NA	ClinVar/OMIM	encephalopathy, familial, with neuroserpin inclusion bodies	0	C1858680
encephalopathy, familial, with neuroserpin inclusion bodies	SERPINI1	p.gly18ala	NA	ClinVar/OMIM	encephalopathy, familial, with neuroserpin inclusion bodies	0	C1858680
erythrocytosis, familial, 3	EGLN1	p.ser154ter	NA	ClinVar/OMIM	erythrocytosis, familial, 3	0	C1853286
hypohidrotic x-linked ectodermal dysplasia	EDA	p.pro200fs	NA	ClinVar/OMIM	hypohidrotic x-linked ectodermal dysplasia	0	C0162359;C3539920
verloes bourguignon syndrome	LTBP3	p.pro1070ser	NA	ClinVar/OMIM	verloes bourguignon syndrome	0	C1832594
verloes bourguignon syndrome	LTBP3	p.lys452glu	NA	ClinVar/OMIM	verloes bourguignon syndrome	0	C1832594
combined deficiency of sialidase and beta galactosidase	CTSA	p.ala17thr	NA	ClinVar/OMIM	combined deficiency of sialidase and beta galactosidase	0	C0268233
ullrich congenital muscular dystrophy 2	COL12A1	p.ser1580fs	NA	ClinVar/OMIM	ullrich congenital muscular dystrophy 2	0	C4225314	B
ehlers-danlos syndrome, type vii, autosomal recessive	ADAMTS2	p.leu11fs	NA	ClinVar/OMIM	ehlers-danlos syndrome, type vii, autosomal recessive	0	C2700425	A
verloes bourguignon syndrome	LTBP3	p.asp744glu	NA	ClinVar/OMIM	verloes bourguignon syndrome	0	C1832594
encephalopathy, familial, with neuroserpin inclusion bodies	SERPINI1	p.lys130gln	NA	ClinVar/OMIM	encephalopathy, familial, with neuroserpin inclusion bodies	0	C1858680
verloes bourguignon syndrome	LTBP3	p.val1229met	NA	ClinVar/OMIM	verloes bourguignon syndrome	0	C1832594
erythrocytosis, familial, 3	EGLN1	p.asn415ser	NA	ClinVar/OMIM	erythrocytosis, familial, 3	0	C1853286
odontoonychodermal dysplasia	WNT10A	p.ala317fs	NA	ClinVar/OMIM	odontoonychodermal dysplasia	0	C0796093;C0013575
visceral heterotaxy 5, autosomal	NODAL	p.gly149fs	NA	ClinVar/OMIM	visceral heterotaxy 5, autosomal	0	C3495537
alpha-2-plasmin inhibitor deficiency	SERPINF2	p.glu176del	NA	ClinVar/OMIM	alpha-2-plasmin inhibitor deficiency	0	C2752081
alpha-2-plasmin inhibitor deficiency	SERPINF2	p.val411met	NA	ClinVar/OMIM	alpha-2-plasmin inhibitor deficiency	0	C2752081
hennekam lymphangiectasia-lymphedema syndrome 1	CCBE1	p.cys102ser	NA	ClinVar/OMIM	hennekam lymphangiectasia-lymphedema syndrome 1	0	C4012050
hennekam lymphangiectasia-lymphedema syndrome 1	CCBE1	p.gly327arg	NA	ClinVar/OMIM	hennekam lymphangiectasia-lymphedema syndrome 1	0	C4012050
hennekam lymphangiectasia-lymphedema syndrome 1	CCBE1	p.arg158cys	NA	ClinVar/OMIM	hennekam lymphangiectasia-lymphedema syndrome 1	0	C4012050
hennekam lymphangiectasia-lymphedema syndrome 1	CCBE1	p.cys174arg	NA	ClinVar/OMIM	hennekam lymphangiectasia-lymphedema syndrome 1	0	C4012050
kininogen deficiency, total	KNG1	p.arg196ter	NA	ClinVar/OMIM	kininogen deficiency, total	0	C1856719;C0272340
high molecular weight kininogen deficiency	KNG1	p.lys498fs	NA	ClinVar/OMIM	high molecular weight kininogen deficiency	0	C0272340
high molecular weight kininogen deficiency	KNG1	p.his406fs	NA	ClinVar/OMIM	high molecular weight kininogen deficiency	0	C0272340
geleophysic dysplasia	ADAMTSL2	p.glu114lys	NA	ClinVar/OMIM	geleophysic dysplasia	0	C3489726
factor xii (locarno)	F12	p.arg372pro	NA	ClinVar/OMIM	factor xii	0	C0015526;C4017222
factor xii (tenri)	F12	p.tyr53cys	NA	ClinVar/OMIM	factor xii	0	C0015526;C4017222
angioedema, hereditary, type iii	F12	p.thr328arg	NA	ClinVar/OMIM	angioedema, hereditary, type iii	0	C1857728
fraser syndrome 2	FREM2	p.glu1974lys	NA	ClinVar/OMIM	fraser syndrome 2	0	C4540036	A
charge syndrome (1 patient)	SEMA3E	p.ser703leu	NA	ClinVar/OMIM	charge syndrome	0	C0265354
fraser syndrome 1	FRAS1	p.phe1807_ser1808del	NA	ClinVar/OMIM	fraser syndrome 1	0	C4551480	A
crisponi/cold-induced sweating syndrome 2	CLCF1	p.tyr107ter	NA	ClinVar/OMIM	crisponi/cold-induced sweating syndrome 2	0	C1853198
crisponi/cold-induced sweating syndrome 2	CLCF1	p.arg197leu	NA	ClinVar/OMIM	crisponi/cold-induced sweating syndrome 2	0	C1853198
macular dystrophy	IMPG2	p.arg964ter	NA	ClinVar/OMIM	macular dystrophy	0	C1842914;C0242383
mental retardation, autosomal recessive 1	PRSS12	p.asp452fs	NA	ClinVar/OMIM	mental retardation, autosomal recessive 1	0	C0025362;C3714756
odontoonychodermal dysplasia	WNT10A	p.arg128gln	NA	ClinVar/OMIM	odontoonychodermal dysplasia	0	C0796093;C0013575
ficolin 3 deficiency	FCN3	p.leu117fs	NA	ClinVar/OMIM	ficolin 3 deficiency	0	C3151226
fbln5-related cutis laxa	FBLN5	p.ser227pro	NA	ClinVar/OMIM	fbln5-related cutis laxa	0	C1414541
macular degeneration, age-related, 3	FBLN5	p.arg71gln	NA	ClinVar/OMIM	macular degeneration, age-related, 3	0	C1837187;C0242383	C
macular degeneration, age-related, 3	FBLN5	p.pro87ser	NA	ClinVar/OMIM	macular degeneration, age-related, 3	0	C1837187;C0242383	C
macular degeneration, age-related, 3	FBLN5	p.ile169thr	NA	ClinVar/OMIM	macular degeneration, age-related, 3	0	C1837187;C0242383	C
macular degeneration, age-related, 3	FBLN5	p.gly412glu	NA	ClinVar/OMIM	macular degeneration, age-related, 3	0	C1837187;C0242383	C
ehlers-danlos syndrome, type vii, autosomal recessive	ADAMTS2	p.gln225ter	NA	ClinVar/OMIM	ehlers-danlos syndrome, type vii, autosomal recessive	0	C2700425	A
ehlers-danlos syndrome, dermatosparaxis type	ADAMTS2	p.trp795ter	NA	ClinVar/OMIM	ehlers-danlos syndrome, dermatosparaxis type	0	C2700425	A
cornea plana 2	KERA	p.gln174ter	NA	ClinVar/OMIM	cornea plana 2	0	C1857574
cornea plana 2	KERA	p.thr215lys	NA	ClinVar/OMIM	cornea plana 2	0	C1857574
cornea plana 2	KERA	p.arg313ter	NA	ClinVar/OMIM	cornea plana 2	0	C1857574
lysyl hydroxylase 3 deficiency	PLOD3	p.cys691fs	NA	ClinVar/OMIM	lysyl hydroxylase 3 deficiency	0	C2676285;C0009782
endplate acetylcholinesterase deficiency	COLQ	p.glu214ter	NA	ClinVar/OMIM	endplate acetylcholinesterase deficiency	0	C1864233
periodontitis, aggressive, 1	CTSC	p.tyr412cys	NA	ClinVar/OMIM	periodontitis, aggressive, 1	0	C0031106
htra1-related cerebral small vessel disease	HTRA1	p.arg370ter	NA	ClinVar/OMIM	htra1-related cerebral small vessel disease	0	C1825552
cerebral autosomal recessive arteriopathy with subcortical infarcts and leukoencephalopathy	HTRA1	p.arg302ter	NA	ClinVar/OMIM	cerebral autosomal recessive arteriopathy with subcortical infarcts and leukoencephalopathy	0	C1838577;C0270612
cerebral autosomal recessive arteriopathy with subcortical infarcts and leukoencephalopathy	HTRA1	p.val297met	NA	ClinVar/OMIM	cerebral autosomal recessive arteriopathy with subcortical infarcts and leukoencephalopathy	0	C1838577;C0270612
cerebral autosomal recessive arteriopathy with subcortical infarcts and leukoencephalopathy	HTRA1	p.ala252thr	NA	ClinVar/OMIM	cerebral autosomal recessive arteriopathy with subcortical infarcts and leukoencephalopathy	0	C1838577;C0270612
multiple epiphyseal dysplasia, dominant	MATN3	p.arg121trp	NA	ClinVar/OMIM	multiple epiphyseal dysplasia, dominant	0	C0026760
multiple epiphyseal dysplasia, dominant	MATN3	p.cys304ser	NA	ClinVar/OMIM	multiple epiphyseal dysplasia, dominant	0	C0026760
corneal dystrophy	TGFBI	p.pro501thr	NA	ClinVar/OMIM	corneal dystrophy	0	C0010036
factor v and factor viii, combined deficiency of, 1	LMAN1	p.gln266fs	NA	ClinVar/OMIM	factor v and factor viii, combined deficiency of, 1	0	C1856883
factor v and factor viii, combined deficiency of, 1	LMAN1	p.asn452_leu453inster	NA	ClinVar/OMIM	factor v and factor viii, combined deficiency of, 1	0	C1856883
unverricht-lundborg syndrome	CSTB	p.gly4arg	NA	ClinVar/OMIM	unverricht-lundborg syndrome	0	C0751785;C0751778
myoclonic epilepsy of unverricht and lundborg	CSTB	p.gln71pro	NA	ClinVar/OMIM	myoclonic epilepsy of unverricht and lundborg	0	C0751785;C0751778
hereditary disease	CTSK	p.gly146arg	NA	ClinVar/OMIM	hereditary disease	0	C0019247
pycnodysostosis	CTSK	p.arg241ter	NA	ClinVar/OMIM	pycnodysostosis	0	C0238402
pycnodysostosis	CTSK	p.ala277val	NA	ClinVar/OMIM	pycnodysostosis	0	C0238402
pycnodysostosis	CTSK	p.leu309pro	NA	ClinVar/OMIM	pycnodysostosis	0	C0238402
ehlers-danlos syndrome, classic-like, 1	TNXB	p.lys1097fs	NA	ClinVar/OMIM	ehlers-danlos syndrome, classic-like, 1	0	C1848029	A
hypophosphatemic rickets, autosomal recessive, 1	DMP1	p.tyr496fs	NA	ClinVar/OMIM	hypophosphatemic rickets, autosomal recessive, 1	0	C0342643
holoprosencephaly	SHH	p.arg263_ala269del	NA	ClinVar/OMIM	holoprosencephaly	0	C1835819;C0079541
holoprosencephaly 3	SHH	p.ala383thr	NA	ClinVar/OMIM	holoprosencephaly 3	0	C0079541;C1840529
holoprosencephaly	SHH	p.ala378_phe380del	NA	ClinVar/OMIM	holoprosencephaly	0	C1835819;C0079541
pseudoachondroplasia	COMP	p.asp472_asp473dup	NA	ClinVar/OMIM	pseudoachondroplasia	0	C4310949;C0410538
epiphyseal dysplasia, multiple, 1	COMP	p.asp473_asn474insasp	NA	ClinVar/OMIM	epiphyseal dysplasia, multiple, 1	0	C1838280;C0026760
pseudoachondroplasia, severe	COMP	p.gly719asp	NA	ClinVar/OMIM	pseudoachondroplasia, severe	0	C0410538;C4310948
epiphyseal dysplasia, multiple, 1	COMP	p.arg718trp	NA	ClinVar/OMIM	epiphyseal dysplasia, multiple, 1	0	C1838280;C0026760
hemophilia b	F9	p.gln57ter	NA	ClinVar/OMIM	hemophilia b	0	C0008533
hemophilia b	F9	p.cys18arg	NA	ClinVar/OMIM	hemophilia b	0	C0008533
hemophilia b	F9	p.glu27lys	NA	ClinVar/OMIM	hemophilia b	0	C0008533
hemophilia b	F9	p.glu73val	NA	ClinVar/OMIM	hemophilia b	0	C0008533
hereditary factor ix deficiency disease	F9	p.arg75ter	NA	ClinVar/OMIM	hereditary factor ix deficiency disease	0	C0008533
hemophilia b	F9	p.glu79asp	NA	ClinVar/OMIM	hemophilia b	0	C0008533
hemophilia b	F9	p.asp93gly	NA	ClinVar/OMIM	hemophilia b	0	C0008533
hemophilia b	F9	p.gln96pro	NA	ClinVar/OMIM	hemophilia b	0	C0008533
hemophilia b	F9	p.pro101ala	NA	ClinVar/OMIM	hemophilia b	0	C0008533
hemophilia b	F9	p.asp110gly	NA	ClinVar/OMIM	hemophilia b	0	C0008533
hemophilia b	F9	p.gly160ala	NA	ClinVar/OMIM	hemophilia b	0	C0008533
hemophilia b	F9	p.asn166tyr	NA	ClinVar/OMIM	hemophilia b	0	C0008533
hemophilia b	F9	p.arg191cys	NA	ClinVar/OMIM	hemophilia b	0	C0008533
hemophilia b	F9	p.arg294ter	NA	ClinVar/OMIM	hemophilia b	0	C0008533
hemophilia b	F9	p.gln219ter	NA	ClinVar/OMIM	hemophilia b	0	C0008533
hemophilia b	F9	p.arg226trp	NA	ClinVar/OMIM	hemophilia b	0	C0008533
hemophilia b(m)	F9	p.arg226gln	NA	ClinVar/OMIM	hemophilia b	0	C0008533
hemophilia b	F9	p.val181phe	NA	ClinVar/OMIM	hemophilia b	0	C0008533
hemophilia b	F9	p.val228phe	NA	ClinVar/OMIM	hemophilia b	0	C0008533
hemophilia b(m)	F9	p.val228leu	NA	ClinVar/OMIM	hemophilia b	0	C0008533
hemophilia b	F9	p.gln237ter	NA	ClinVar/OMIM	hemophilia b	0	C0008533
hemophilia b	F9	p.gln237leu	NA	ClinVar/OMIM	hemophilia b	0	C0008533
hemophilia b	F9	p.cys268trp	NA	ClinVar/OMIM	hemophilia b	0	C0008533
hemophilia b	F9	p.ala233thr	NA	ClinVar/OMIM	hemophilia b	0	C0008533
hemophilia b	F9	p.arg298ter	NA	ClinVar/OMIM	hemophilia b	0	C0008533
hemophilia b	F9	p.asn306ser	NA	ClinVar/OMIM	hemophilia b	0	C0008533
hemophilia b	F9	p.pro333leu	NA	ClinVar/OMIM	hemophilia b	0	C0008533
hemophilia b	F9	p.ala337pro	NA	ClinVar/OMIM	hemophilia b	0	C0008533
hemophilia b	F9	p.val353ala	NA	ClinVar/OMIM	hemophilia b	0	C0008533
hemophilia b	F9	p.gly355val	NA	ClinVar/OMIM	hemophilia b	0	C0008533
hemophilia b	F9	p.arg379ter	NA	ClinVar/OMIM	hemophilia b	0	C0008533
hemophilia b	F9	p.cys382arg	NA	ClinVar/OMIM	hemophilia b	0	C0008533
hemophilia b	F9	p.arg384ter	NA	ClinVar/OMIM	hemophilia b	0	C0008533
hemophilia b	F9	p.met394val	NA	ClinVar/OMIM	hemophilia b	0	C0008533
hemophilia b	F9	p.ser406leu	NA	ClinVar/OMIM	hemophilia b	0	C0008533
hemophilia b	F9	p.gly363val	NA	ClinVar/OMIM	hemophilia b	0	C0008533
hemophilia b	F9	p.pro414thr	NA	ClinVar/OMIM	hemophilia b	0	C0008533
hemophilia b	F9	p.ala436glu	NA	ClinVar/OMIM	hemophilia b	0	C0008533
hemophilia b	F9	p.ala436val	NA	ClinVar/OMIM	hemophilia b	0	C0008533
hemophilia b	F9	p.gly442arg	NA	ClinVar/OMIM	hemophilia b	0	C0008533
hemophilia b	F9	p.ile443thr	NA	ClinVar/OMIM	hemophilia b	0	C0008533
hemophilia b	F9	p.trp453arg	NA	ClinVar/OMIM	hemophilia b	0	C0008533
hemophilia b	F9	p.lys457ter	NA	ClinVar/OMIM	hemophilia b	0	C0008533
hemophilia b	F9	p.val374phe	NA	ClinVar/OMIM	hemophilia b	0	C0008533
hemophilia b	F9	p.arg162ter	NA	ClinVar/OMIM	hemophilia b	0	C0008533
hemophilia b	F9	p.cys396ser	NA	ClinVar/OMIM	hemophilia b	0	C0008533
hemophilia b	F9	p.asp110asn	NA	ClinVar/OMIM	hemophilia b	0	C0008533
hemophilia b	F9	p.gly357glu	NA	ClinVar/OMIM	hemophilia b	0	C0008533
hemophilia b	F9	p.ser411ile	NA	ClinVar/OMIM	hemophilia b	0	C0008533
hemophilia b	F9	p.ser411gly	NA	ClinVar/OMIM	hemophilia b	0	C0008533
hemophilia b	F9	p.asp410his	NA	ClinVar/OMIM	hemophilia b	0	C0008533
hemophilia b	F9	p.glu291val	NA	ClinVar/OMIM	hemophilia b	0	C0008533
hemophilia b	F9	p.val419glu	NA	ClinVar/OMIM	hemophilia b	0	C0008533
hemophilia b	F9	p.arg384pro	NA	ClinVar/OMIM	hemophilia b	0	C0008533
hemophilia b	F9	p.ala397pro	NA	ClinVar/OMIM	hemophilia b	0	C0008533
hemophilia b	F9	p.ile344thr	NA	ClinVar/OMIM	hemophilia b	0	C0008533
hemophilia b	F9	p.cys252ser	NA	ClinVar/OMIM	hemophilia b	0	C0008533
hemophilia b	F9	p.arg180fs	NA	ClinVar/OMIM	hemophilia b	0	C0008533
thrombophilia, x-linked, due to factor ix defect	F9	p.arg384leu	NA	ClinVar/OMIM	thrombophilia, x-linked, due to factor ix defect	0	C2749016
ectodermal dysplasia 1, hypohidrotic/hair/tooth type, x-linked	EDA	p.tyr61his	NA	ClinVar/OMIM	ectodermal dysplasia 1, hypohidrotic/hair/tooth type, x-linked	0	C3539920;C0162359
ectodermal dysplasia 1, hypohidrotic/hair/tooth type, x-linked	EDA	p.gln23ter	NA	ClinVar/OMIM	ectodermal dysplasia 1, hypohidrotic/hair/tooth type, x-linked	0	C3539920;C0162359
hereditary pancreatitis	PRSS1	p.lys23arg	NA	ClinVar/OMIM	hereditary pancreatitis	0	C0030305;C0238339
hereditary pancreatitis	PRSS1	p.arg122his	NA	ClinVar/OMIM	hereditary pancreatitis	0	C0030305;C0238339
factor x deficiency	F10	p.arg366cys	NA	ClinVar/OMIM	factor x deficiency	0	C0015519
factor x deficiency	F10	p.ile271_leu272inster	NA	ClinVar/OMIM	factor x deficiency	0	C0015519
factor x deficiency	F10	p.arg287trp	NA	ClinVar/OMIM	factor x deficiency	0	C0015519
ichthyosis, congenital, autosomal recessive 1, with or without bathing suit distribution	TGM1	p.arg143his	NA	ClinVar/OMIM	ichthyosis, congenital, autosomal recessive 1, with or without bathing suit distribution	0	C0079583;C0079154;C0020758
ichthyosis, congenital, autosomal recessive 1	TGM1	p.arg142his	NA	ClinVar/OMIM	ichthyosis, congenital, autosomal recessive 1	0	C0079154;C0020758
ichthyosis, congenital, autosomal recessive 1	TGM1	p.gly218ser	NA	ClinVar/OMIM	ichthyosis, congenital, autosomal recessive 1	0	C0079154;C0020758
surfactant metabolism dysfunction, pulmonary, 1	SFTPB	p.gly155=	NA	ClinVar/OMIM	surfactant metabolism dysfunction, pulmonary, 1	0	C1968602
dysplasminogenemia	PLG	p.val374phe	NA	ClinVar/OMIM	dysplasminogenemia	0	C1968804
dysplasminogenemia	PLG	p.ser591pro	NA	ClinVar/OMIM	dysplasminogenemia	0	C1968804
plasminogen deficiency, type i	PLG	p.arg235his	NA	ClinVar/OMIM	plasminogen deficiency, type i	0	C1968804
plasminogen deficiency, type i	PLG	p.trp616ter	NA	ClinVar/OMIM	plasminogen deficiency, type i	0	C1968804
plasminogen deficiency, type i	PLG	p.glu479ter	NA	ClinVar/OMIM	plasminogen deficiency, type i	0	C1968804
dysplasminogenemia	PLG	p.gly751arg	NA	ClinVar/OMIM	dysplasminogenemia	0	C1968804
plasminogen deficiency, type i	PLG	p.lys231del	NA	ClinVar/OMIM	plasminogen deficiency, type i	0	C1968804
congenital deafness with labyrinthine aplasia, microtia, and microdontia	FGF3	p.ser156pro	NA	ClinVar/OMIM	congenital deafness with labyrinthine aplasia, microtia, and microdontia	0	C1853144
deafness, congenital, with inner ear agenesis, microtia, and microdontia	FGF3	p.val206fs	NA	ClinVar/OMIM	deafness, congenital, with inner ear agenesis, microtia, and microdontia	0	C1853144
deafness, congenital, with inner ear agenesis, microtia, and microdontia	FGF3	p.gly66cys	NA	ClinVar/OMIM	deafness, congenital, with inner ear agenesis, microtia, and microdontia	0	C1853144
deafness, congenital, with inner ear agenesis, microtia, and microdontia	FGF3	p.leu6pro	NA	ClinVar/OMIM	deafness, congenital, with inner ear agenesis, microtia, and microdontia	0	C1853144
deafness, congenital, with inner ear agenesis, microtia, and microdontia	FGF3	p.ile85fs	NA	ClinVar/OMIM	deafness, congenital, with inner ear agenesis, microtia, and microdontia	0	C1853144
neuropathy, hereditary sensory and autonomic, type v	NGF	p.arg221trp	NA	ClinVar/OMIM	neuropathy, hereditary sensory and autonomic, type v	0	C0020075
muscular dystrophy, congenital, due to partial lama2 deficiency	LAMA2	p.arg1549ter	NA	ClinVar/OMIM	muscular dystrophy, congenital, due to partial lama2 deficiency	0	C1842898	B
laminin alpha 2-related dystrophy	LAMA2	p.cys967ter	NA	ClinVar/OMIM	laminin alpha 2-related dystrophy	0	C0532236;C1416776
ehlers-danlos syndrome, kyphoscoliotic type, 1	PLOD1	p.gly678arg	NA	ClinVar/OMIM	ehlers-danlos syndrome, kyphoscoliotic type, 1	0	C0268342	A
ehlers-danlos syndrome, kyphoscoliotic type, 1	PLOD1	p.glu532del	NA	ClinVar/OMIM	ehlers-danlos syndrome, kyphoscoliotic type, 1	0	C0268342	A
ehlers-danlos syndrome, hydroxylysine-deficient	PLOD1	p.tyr511ter	NA	ClinVar/OMIM	ehlers-danlos syndrome, hydroxylysine-deficient	0	C0268342	A
pierson syndrome	LAMB2	p.tyr689ter	NA	ClinVar/OMIM	pierson syndrome	0	C1836876
epidermolysis bullosa, junctional, non-herlitz type	LAMB3	p.trp302fs	NA	ClinVar/OMIM	epidermolysis bullosa, junctional, non-herlitz type	0	C2608084;C0268374;C0014527
epidermolysis bullosa, junctional, herlitz type	LAMB3	p.trp610ter	NA	ClinVar/OMIM	epidermolysis bullosa, junctional, herlitz type	0	C0079683
epidermolysis bullosa, junctional, non-herlitz type	LAMB3	p.pro480fs	NA	ClinVar/OMIM	epidermolysis bullosa, junctional, non-herlitz type	0	C2608084;C0268374;C0014527
epidermolysis bullosa, junctional, non-herlitz type, somatic mosaic revertant	LAMB3	p.gly199ala	NA	ClinVar/OMIM	epidermolysis bullosa, junctional, non-herlitz type, somatic mosaic revertant	0	C0268374
epidermolysis bullosa, junctional, herlitz type	LAMC2	p.tyr355ter	NA	ClinVar/OMIM	epidermolysis bullosa, junctional, herlitz type	0	C0079683
osteomyelitis, sterile multifocal, with periostitis and pustulosis	IL1RN	p.glu80ter	NA	ClinVar/OMIM	osteomyelitis, sterile multifocal, with periostitis and pustulosis	0	C2748507
thrombophilia due to heparin cofactor ii deficiency	SERPIND1	p.phe477fs	NA	ClinVar/OMIM	thrombophilia due to heparin cofactor ii deficiency	0	C0398626
fibrinogen pontoise 2	FGB	p.ala365thr	NA	ClinVar/OMIM	fibrinogen pontoise 2	0	C4016075
fibrinogen ise	FGB	p.gly45cys	NA	ClinVar/OMIM	fibrinogen ise	0	C4016077;C1260903
fibrinogen nijmegen	FGB	p.arg74cys	NA	ClinVar/OMIM	fibrinogen nijmegen	0	C3888186;C1260903;C4016074
fibrinogen naples	FGB	p.ala98thr	NA	ClinVar/OMIM	fibrinogen naples	0	C4016078
afibrinogenemia, congenital	FGB	p.leu383arg	NA	ClinVar/OMIM	afibrinogenemia, congenital	0	C2584774
afibrinogenemia, congenital	FGB	p.gly430asp	NA	ClinVar/OMIM	afibrinogenemia, congenital	0	C2584774
hypofibrinogenemia, congenital, severe	FGB	p.leu202gln	NA	ClinVar/OMIM	hypofibrinogenemia, congenital, severe	0	C2584774
fibrinogen lille 1	FGA	p.asp26asn	NA	ClinVar/OMIM	fibrinogen lille 1	0	C4017724
fibrinogen rouen 1	FGA	p.gly31val	NA	ClinVar/OMIM	fibrinogen rouen 1	0	C4016061
fibrinogen kyoto 2	FGA	p.pro37leu	NA	ClinVar/OMIM	fibrinogen kyoto 2	0	C4016066
fibrinogen caracas 2	FGA	p.ser453asn	NA	ClinVar/OMIM	fibrinogen caracas 2	0	C4016067
fibrinogen marburg	FGA	p.lys480ter	NA	ClinVar/OMIM	fibrinogen marburg	0	C4016069
amyloidosis, familial visceral	FGA	p.arg573leu	NA	ClinVar/OMIM	amyloidosis, familial visceral	0	C0268389	C
amyloidosis, familial visceral	FGA	p.val541fs	NA	ClinVar/OMIM	amyloidosis, familial visceral	0	C0268389	C
amyloidosis, familial visceral	FGA	p.glu545val	NA	ClinVar/OMIM	amyloidosis, familial visceral	0	C0268389	C
fibrinogen dusart	FGA	p.arg573cys	NA	ClinVar/OMIM	fibrinogen dusart	0	C4016070
fibrinogen canterbury	FGA	p.val39asp	NA	ClinVar/OMIM	fibrinogen canterbury	0	C4016071;C1260903
amyloidosis, familial visceral	FGA	p.thr544fs	NA	ClinVar/OMIM	amyloidosis, familial visceral	0	C0268389	C
afibrinogenemia, congenital	FGA	p.lys238ter	NA	ClinVar/OMIM	afibrinogenemia, congenital	0	C2584774
fibrinogen keokuk	FGA	p.gln347ter	NA	ClinVar/OMIM	fibrinogen keokuk	0	C0553681;C4016073
marfan syndrome, severe classic	FBN1	p.arg1137pro	NA	ClinVar/OMIM	marfan syndrome, severe classic	0	C4016052;C0024796	A
marfan syndrome	FBN1	p.cys2307ser	NA	ClinVar/OMIM	marfan syndrome	0	C3541518;C0024796	A
marfan syndrome	FBN1	p.trp2756ter	NA	ClinVar/OMIM	marfan syndrome	0	C3541518;C0024796	A
marfan syndrome	FBN1	p.cys1249ser	NA	ClinVar/OMIM	marfan syndrome	0	C3541518;C0024796	A
marfan syndrome	FBN1	p.cys1663arg	NA	ClinVar/OMIM	marfan syndrome	0	C3541518;C0024796	A
marfan syndrome	FBN1	p.cys2221ser	NA	ClinVar/OMIM	marfan syndrome	0	C3541518;C0024796	A
marfan syndrome	FBN1	p.cys1117tyr	NA	ClinVar/OMIM	marfan syndrome	0	C3541518;C0024796	A
marfan syndrome	FBN1	p.cys1242tyr	NA	ClinVar/OMIM	marfan syndrome	0	C3541518;C0024796	A
marfan syndrome	FBN1	p.tyr2113ter	NA	ClinVar/OMIM	marfan syndrome	0	C3541518;C0024796	A
marfan syndrome	FBN1	p.asn548ile	NA	ClinVar/OMIM	marfan syndrome	0	C3541518;C0024796	A
marfan syndrome	FBN1	p.asp723ala	NA	ClinVar/OMIM	marfan syndrome	0	C3541518;C0024796	A
mass syndrome	FBN1	p.asn1713fs	NA	ClinVar/OMIM	mass syndrome	0	C1858556
marfan syndrome, neonatal	FBN1	p.cys1074arg	NA	ClinVar/OMIM	marfan syndrome, neonatal	0	C4016054;C0024796	A
marfan's syndrome	FBN1	p.gly1127ser	NA	ClinVar/OMIM	marfan's syndrome	0	C0024796;C0265227;C1321551	A
marfan syndrome, neonatal	FBN1	p.lys1043arg	NA	ClinVar/OMIM	marfan syndrome, neonatal	0	C4016054;C0024796	A
marfan syndrome, neonatal	FBN1	p.asn1131tyr	NA	ClinVar/OMIM	marfan syndrome, neonatal	0	C4016054;C0024796	A
marfan syndrome	FBN1	p.glu1065fs	NA	ClinVar/OMIM	marfan syndrome	0	C3541518;C0024796	A
marfan syndrome, classic	FBN1	p.cys1265arg	NA	ClinVar/OMIM	marfan syndrome, classic	0	C0024796;C4016057	A
marfan syndrome, atypical	FBN1	p.gly985glu	NA	ClinVar/OMIM	marfan syndrome, atypical	0	C0024796;C4016055	A
marfan syndrome	FBN1	p.gly1013arg	NA	ClinVar/OMIM	marfan syndrome	0	C3541518;C0024796	A
weill-marchesani syndrome 2	FBN1	p.arg1692_tyr1699del	NA	ClinVar/OMIM	weill-marchesani syndrome 2	0	C1869115
marfan syndrome	FBN1	p.tyr754cys	NA	ClinVar/OMIM	marfan syndrome	0	C3541518;C0024796	A
marfan syndrome, neonatal	FBN1	p.cys1032tyr	NA	ClinVar/OMIM	marfan syndrome, neonatal	0	C4016054;C0024796	A
marfan syndrome	FBN1	p.cys1129tyr	NA	ClinVar/OMIM	marfan syndrome	0	C3541518;C0024796	A
marfan syndrome	FBN1	p.cys1221tyr	NA	ClinVar/OMIM	marfan syndrome	0	C3541518;C0024796	A
marfan syndrome, neonatal	FBN1	p.cys1086tyr	NA	ClinVar/OMIM	marfan syndrome, neonatal	0	C4016054;C0024796	A
stiff skin syndrome	FBN1	p.trp1570cys	NA	ClinVar/OMIM	stiff skin syndrome	0	C1861456
stiff skin syndrome	FBN1	p.cys1564ser	NA	ClinVar/OMIM	stiff skin syndrome	0	C1861456
stiff skin syndrome	FBN1	p.cys1577gly	NA	ClinVar/OMIM	stiff skin syndrome	0	C1861456
autoimmune lymphoproliferative syndrome, type ib	FASLG	p.met158_glu185del	NA	ClinVar/OMIM	autoimmune lymphoproliferative syndrome, type ib	0	C1328840
factor xiii, b subunit, deficiency of	F13B	p.cys450phe	NA	ClinVar/OMIM	factor xiii, b subunit, deficiency of	0	C2750481
factor xiii, b subunit, deficiency of	F13B	p.glu500fs	NA	ClinVar/OMIM	factor xiii, b subunit, deficiency of	0	C2750481
cyclic neutropenia	ELANE	p.leu206phe	NA	ClinVar/OMIM	cyclic neutropenia	0	C0221023
cyclical neutropenia	ELANE	p.ala61val	NA	ClinVar/OMIM	cyclical neutropenia	0	C0221023
neutropenia, severe congenital, 1, autosomal dominant	ELANE	p.val72met	NA	ClinVar/OMIM	neutropenia, severe congenital, 1, autosomal dominant	0	C1859966
neutropenia, severe congenital, 1, autosomal dominant	ELANE	p.cys71arg	NA	ClinVar/OMIM	neutropenia, severe congenital, 1, autosomal dominant	0	C1859966
dentinogenesis imperfecta, shields type ii	DSPP	p.gln45ter	NA	ClinVar/OMIM	dentinogenesis imperfecta, shields type ii	0	C2973527
deafness, autosomal dominant nonsyndromic sensorineural 39, with dentinogenesis imperfecta 1	DSPP	p.pro17thr	NA	ClinVar/OMIM	deafness, autosomal dominant nonsyndromic sensorineural 39, with dentinogenesis imperfecta 1	0	C0011053;C0018772
deafness, autosomal dominant nonsyndromic sensorineural 39, with dentinogenesis imperfecta 1	DSPP	p.val18phe	NA	ClinVar/OMIM	deafness, autosomal dominant nonsyndromic sensorineural 39, with dentinogenesis imperfecta 1	0	C0011053;C0018772
dentin dysplasia, type ii	DSPP	p.tyr6asp	NA	ClinVar/OMIM	dentin dysplasia, type ii	0	C0399380
dentinogenesis imperfecta, shields type ii	DSPP	p.ala15val	NA	ClinVar/OMIM	dentinogenesis imperfecta, shields type ii	0	C2973527
c1q deficiency	C1QC	p.gln74fs	NA	ClinVar/OMIM	c1q deficiency	0	C3150902
c1q deficiency	C1QC	p.arg69ter	NA	ClinVar/OMIM	c1q deficiency	0	C3150902
c1q deficiency	C1QC	p.gly34arg	NA	ClinVar/OMIM	c1q deficiency	0	C3150902
c1q deficiency	C1QA	p.gln208ter	NA	ClinVar/OMIM	c1q deficiency	0	C3150902
otospondylomegaepiphyseal dysplasia, autosomal dominant	COL11A2	p.arg1272ter	NA	ClinVar/OMIM	otospondylomegaepiphyseal dysplasia, autosomal dominant	0	C1848488
ullrich congenital muscular dystrophy 1, autosomal recessive	COL6A3	p.arg465ter	NA	ClinVar/OMIM	ullrich congenital muscular dystrophy 1, autosomal recessive	0	C4225637	B
bethlem myopathy 1	COL6A3	p.leu1726arg	NA	ClinVar/OMIM	bethlem myopathy 1	0	C1834674
bethlem myopathy 1	COL6A2	p.gly271ser	NA	ClinVar/OMIM	bethlem myopathy 1	0	C1834674
bethlem myopathy 1	COL6A2	p.asp621asn	NA	ClinVar/OMIM	bethlem myopathy 1	0	C1834674
bethlem myopathy 1	COL6A2	p.cys777arg	NA	ClinVar/OMIM	bethlem myopathy 1	0	C1834674
bethlem myopathy 1	COL6A2	p.gly283arg	NA	ClinVar/OMIM	bethlem myopathy 1	0	C1834674
ehlers-danlos syndrome, classic type, 1	COL5A1	p.cys1639ser	NA	ClinVar/OMIM	ehlers-danlos syndrome, classic type, 1	0	C4225429	A
ehlers-danlos syndrome, classic type, 1	COL5A1	p.ser1088_gly1123del	NA	ClinVar/OMIM	ehlers-danlos syndrome, classic type, 1	0	C4225429	A
ehlers-danlos syndrome, classic type, 1	COL5A1	p.gly1489glu	NA	ClinVar/OMIM	ehlers-danlos syndrome, classic type, 1	0	C4225429	A
ehlers-danlos syndrome, classic type, 1	COL5A1	p.pro1251fs	NA	ClinVar/OMIM	ehlers-danlos syndrome, classic type, 1	0	C4225429	A
ehlers-danlos syndrome, classic type, 1	COL5A1	p.arg792ter	NA	ClinVar/OMIM	ehlers-danlos syndrome, classic type, 1	0	C4225429	A
ehlers-danlos syndrome, nonvascular variant	COL3A1	p.gly804ser	NA	ClinVar/OMIM	ehlers-danlos syndrome, nonvascular variant	0	C0013720	A
osteogenesis imperfecta, type ii	COL1A1	p.gly275asp	NA	ClinVar/OMIM	osteogenesis imperfecta, type ii	0	C0268358
osteogenesis imperfecta, type i	COL1A1	p.gly272cys	NA	ClinVar/OMIM	osteogenesis imperfecta, type i	0	C0023931
osteogenesis imperfecta, type iv	COL1A1	p.gly353cys	NA	ClinVar/OMIM	osteogenesis imperfecta, type iv	0	C0268363
osteogenesis imperfecta, type ii	COL1A1	p.gly569arg	NA	ClinVar/OMIM	osteogenesis imperfecta, type ii	0	C0268358
oi type iv	COL1A1	p.gly704cys	NA	ClinVar/OMIM	oi type iv	0	C0268363
osteogenesis imperfecta, type ii	COL1A1	p.gly737asp	NA	ClinVar/OMIM	osteogenesis imperfecta, type ii	0	C0268358
osteogenesis imperfecta, type ii	COL1A1	p.gly851asp	NA	ClinVar/OMIM	osteogenesis imperfecta, type ii	0	C0268358
osteogenesis imperfecta, type ii	COL1A1	p.gly845arg	NA	ClinVar/OMIM	osteogenesis imperfecta, type ii	0	C0268358
osteogenesis imperfecta, type ii	COL1A1	p.gly869cys	NA	ClinVar/OMIM	osteogenesis imperfecta, type ii	0	C0268358
osteogenesis imperfecta, type ii	COL1A1	p.gly896cys	NA	ClinVar/OMIM	osteogenesis imperfecta, type ii	0	C0268358
osteogenesis imperfecta, type ii	COL1A1	p.gly926cys	NA	ClinVar/OMIM	osteogenesis imperfecta, type ii	0	C0268358
osteogenesis imperfecta, type iv	COL1A1	p.gly1010ser	NA	ClinVar/OMIM	osteogenesis imperfecta, type iv	0	C0268363
osteogenesis imperfecta, type iii	COL1A1	p.gly1022ser	NA	ClinVar/OMIM	osteogenesis imperfecta, type iii	0	C0268362;C0268363;C0029456
osteogenesis imperfecta, type ii	COL1A1	p.gly1025arg	NA	ClinVar/OMIM	osteogenesis imperfecta, type ii	0	C0268358
osteogenesis imperfecta, type ii	COL1A1	p.gly1061asp	NA	ClinVar/OMIM	osteogenesis imperfecta, type ii	0	C0268358
osteogenesis imperfecta, type ii	COL1A1	p.gly1082cys	NA	ClinVar/OMIM	osteogenesis imperfecta, type ii	0	C0268358
osteogenesis imperfecta, type ii	COL1A1	p.gly1091ser	NA	ClinVar/OMIM	osteogenesis imperfecta, type ii	0	C0268358
osteogenesis imperfecta, type ii	COL1A1	p.gly1166cys	NA	ClinVar/OMIM	osteogenesis imperfecta, type ii	0	C0268358
osteogenesis imperfecta, type ii	COL1A1	p.gly1187ser	NA	ClinVar/OMIM	osteogenesis imperfecta, type ii	0	C0268358
osteogenesis imperfecta, type i	COL1A1	p.gly356cys	NA	ClinVar/OMIM	osteogenesis imperfecta, type i	0	C0023931
osteogenesis imperfecta, type ii	COL1A1	p.gly719asp	NA	ClinVar/OMIM	osteogenesis imperfecta, type ii	0	C0268358
ehlers-danlos syndrome, arthrochalasia type, 1	COL1A1	p.met181ile	NA	ClinVar/OMIM	ehlers-danlos syndrome, arthrochalasia type, 1	0	C0268345	A
oi type iv	COL1A1	p.gly332arg	NA	ClinVar/OMIM	oi type iv	0	C0268363
osteogenesis imperfecta, type ii	COL1A1	p.gly1181ser	NA	ClinVar/OMIM	osteogenesis imperfecta, type ii	0	C0268358
osteogenesis imperfecta, type ii	COL1A1	p.gly815val	NA	ClinVar/OMIM	osteogenesis imperfecta, type ii	0	C0268358
osteogenesis imperfecta, type iii/iv	COL1A1	p.gly593cys	NA	ClinVar/OMIM	osteogenesis imperfecta, type iii/iv	0	C4015948
osteogenesis imperfecta	COL1A1	p.gly263arg	NA	ClinVar/OMIM	osteogenesis imperfecta	0	C0029434;C3151218
osteogenesis imperfecta, type iic	COL1A1	p.gly1184val	NA	ClinVar/OMIM	osteogenesis imperfecta, type iic	0	C4015949
osteogenesis imperfecta, type iia	COL1A1	p.gly434val	NA	ClinVar/OMIM	osteogenesis imperfecta, type iia	0	C0268358
osteogenesis imperfecta, type i, mild	COL1A1	p.gly221cys	NA	ClinVar/OMIM	osteogenesis imperfecta, type i, mild	0	C4015950
oi type i	COL1A1	p.gly1079ser	NA	ClinVar/OMIM	oi type i	0	C0023931
osteogenesis imperfecta, type ii	COL1A1	p.gly980val	NA	ClinVar/OMIM	osteogenesis imperfecta, type ii	0	C0268358
osteogenesis imperfecta type i	COL1A1	p.gly530ser	NA	ClinVar/OMIM	osteogenesis imperfecta type i	0	C0023931;C0268363
osteogenesis imperfecta, type ii	COL1A1	p.gly743val	NA	ClinVar/OMIM	osteogenesis imperfecta, type ii	0	C0268358
osteogenesis imperfecta, type ii	COL1A1	p.gly533asp	NA	ClinVar/OMIM	osteogenesis imperfecta, type ii	0	C0268358
oi type iii	COL1A1	p.gly1040ser	NA	ClinVar/OMIM	oi type iii	0	C0268362
oi type iv	COL1A1	p.gly839ser	NA	ClinVar/OMIM	oi type iv	0	C0268363
osteogenesis imperfecta, type iii	COL1A1	p.leu1464pro	NA	ClinVar/OMIM	osteogenesis imperfecta, type iii	0	C0268362;C0268363;C0029456
osteogenesis imperfecta, type i, mild	COL1A1	p.gly191ala	NA	ClinVar/OMIM	osteogenesis imperfecta, type i, mild	0	C4015950
osteogenesis imperfecta, type ii, thin-bone type	COL1A1	p.trp1312cys	NA	ClinVar/OMIM	osteogenesis imperfecta, type ii, thin-bone type	0	C4015952
osteogenesis imperfecta, type ii	COL1A1	p.gly764val	NA	ClinVar/OMIM	osteogenesis imperfecta, type ii	0	C0268358
osteogenesis imperfecta type i	COL1A1	p.arg312cys	NA	ClinVar/OMIM	osteogenesis imperfecta type i	0	C0023931;C0268363
oi/eds combined syndrome	COL1A1	p.gly191asp	NA	ClinVar/OMIM	oi/eds combined syndrome	0	C1852924
osteogenesis imperfecta, type iii	COL1A1	p.gly254glu	NA	ClinVar/OMIM	osteogenesis imperfecta, type iii	0	C0268362;C0268363;C0029456
stickler syndrome, type i, nonsyndromic ocular	COL2A1	p.leu667phe	NA	ClinVar/OMIM	stickler syndrome, type i, nonsyndromic ocular	0	C1836080;C0265253
spondyloepiphyseal dysplasia	COL2A1	p.thr1439met	NA	ClinVar/OMIM	spondyloepiphyseal dysplasia	0	C0038015;C2748515
avascular necrosis of the femoral head, primary, 1	COL2A1	p.gly717ser	NA	ClinVar/OMIM	avascular necrosis of the femoral head, primary, 1	0	C0410480
epidermolysis bullosa dystrophica, autosomal recessive	COL7A1	p.met2798lys	NA	ClinVar/OMIM	epidermolysis bullosa dystrophica, autosomal recessive	0	C0079474;C0014527
epidermolysis bullosa dystrophica, autosomal dominant	COL7A1	p.gly2040ser	NA	ClinVar/OMIM	epidermolysis bullosa dystrophica, autosomal dominant	0	C0432322;C0079294
epidermolysis bullosa dystrophica, autosomal recessive	COL7A1	p.tyr311ter	NA	ClinVar/OMIM	epidermolysis bullosa dystrophica, autosomal recessive	0	C0079474;C0014527
epidermolysis bullosa, pretibial	COL7A1	p.gly2623cys	NA	ClinVar/OMIM	epidermolysis bullosa, pretibial	0	C0432321;C0014527
transient bullous dermolysis of the newborn	COL7A1	p.gly2251glu	NA	ClinVar/OMIM	transient bullous dermolysis of the newborn	0	C0432322;C0079294;C1851573
transient bullous dermolysis of the newborn	COL7A1	p.gly1519asp	NA	ClinVar/OMIM	transient bullous dermolysis of the newborn	0	C0432322;C0079294;C1851573
epidermolysis bullosa pruriginosa, autosomal dominant	COL7A1	p.gly2242arg	NA	ClinVar/OMIM	epidermolysis bullosa pruriginosa, autosomal dominant	0	C2675780;C0079294
epidermolysis bullosa dystrophica, autosomal recessive	COL7A1	p.gly1595arg	NA	ClinVar/OMIM	epidermolysis bullosa dystrophica, autosomal recessive	0	C0079474;C0014527
epidermolysis bullosa dystrophica, autosomal dominant	COL7A1	p.gly2006asp	NA	ClinVar/OMIM	epidermolysis bullosa dystrophica, autosomal dominant	0	C0432322;C0079294
epidermolysis bullosa dystrophica, autosomal dominant	COL7A1	p.gly2015glu	NA	ClinVar/OMIM	epidermolysis bullosa dystrophica, autosomal dominant	0	C0432322;C0079294
epidermolysis bullosa pruriginosa, autosomal dominant	COL7A1	p.gly2073val	NA	ClinVar/OMIM	epidermolysis bullosa pruriginosa, autosomal dominant	0	C2675780;C0079294
epidermolysis bullosa dystrophica, autosomal dominant	COL7A1	p.gly2076asp	NA	ClinVar/OMIM	epidermolysis bullosa dystrophica, autosomal dominant	0	C0432322;C0079294
epidermolysis bullosa dystrophica, autosomal recessive	COL7A1	p.gly2653arg	NA	ClinVar/OMIM	epidermolysis bullosa dystrophica, autosomal recessive	0	C0079474;C0014527
epidermolysis bullosa, junctional, non-herlitz type	COL17A1	p.arg1226ter	NA	ClinVar/OMIM	epidermolysis bullosa, junctional, non-herlitz type	0	C2608084;C0268374;C0014527
epidermolysis bullosa, junctional, non-herlitz type	COL17A1	p.gln1023ter	NA	ClinVar/OMIM	epidermolysis bullosa, junctional, non-herlitz type	0	C2608084;C0268374;C0014527
epidermolysis bullosa, junctional, non-herlitz type	COL17A1	p.leu855ter	NA	ClinVar/OMIM	epidermolysis bullosa, junctional, non-herlitz type	0	C2608084;C0268374;C0014527
epidermolysis bullosa, junctional, non-herlitz type	COL17A1	p.gly633asp	NA	ClinVar/OMIM	epidermolysis bullosa, junctional, non-herlitz type	0	C2608084;C0268374;C0014527
epidermolysis bullosa, junctional, non-herlitz type	COL17A1	p.arg145ter	NA	ClinVar/OMIM	epidermolysis bullosa, junctional, non-herlitz type	0	C2608084;C0268374;C0014527
reduced antithrombin iii activity	SERPINC1	p.ala436thr	NA	ClinVar/OMIM	reduced antithrombin iii activity	0	C0272375
thrombophilia due to antithrombin iii deficiency	SERPINC1	p.ala416pro	NA	ClinVar/OMIM	thrombophilia due to antithrombin iii deficiency	0	C0272375
thrombophilia due to antithrombin iii deficiency	SERPINC1	p.arg425pro	NA	ClinVar/OMIM	thrombophilia due to antithrombin iii deficiency	0	C0272375
thrombophilia due to antithrombin iii deficiency	SERPINC1	p.ser426leu	NA	ClinVar/OMIM	thrombophilia due to antithrombin iii deficiency	0	C0272375
thrombophilia due to antithrombin iii deficiency	SERPINC1	p.arg79ser	NA	ClinVar/OMIM	thrombophilia due to antithrombin iii deficiency	0	C0272375
thrombophilia due to antithrombin iii deficiency	SERPINC1	p.arg425cys	NA	ClinVar/OMIM	thrombophilia due to antithrombin iii deficiency	0	C0272375
thrombophilia due to antithrombin iii deficiency	SERPINC1	p.pro439leu	NA	ClinVar/OMIM	thrombophilia due to antithrombin iii deficiency	0	C0272375
thrombophilia due to antithrombin iii deficiency	SERPINC1	p.arg425his	NA	ClinVar/OMIM	thrombophilia due to antithrombin iii deficiency	0	C0272375
thrombophilia due to antithrombin iii deficiency	SERPINC1	p.ala414thr	NA	ClinVar/OMIM	thrombophilia due to antithrombin iii deficiency	0	C0272375
thrombophilia due to antithrombin iii deficiency	SERPINC1	p.ile39asn	NA	ClinVar/OMIM	thrombophilia due to antithrombin iii deficiency	0	C0272375
thrombophilia due to antithrombin iii deficiency	SERPINC1	p.ser323fs	NA	ClinVar/OMIM	thrombophilia due to antithrombin iii deficiency	0	C0272375
thrombophilia due to antithrombin iii deficiency	SERPINC1	p.asp341fs	NA	ClinVar/OMIM	thrombophilia due to antithrombin iii deficiency	0	C0272375
thrombophilia due to antithrombin iii deficiency	SERPINC1	p.arg161ter	NA	ClinVar/OMIM	thrombophilia due to antithrombin iii deficiency	0	C0272375
antithrombin deficiency	SERPINC1	p.arg161gln	NA	ClinVar/OMIM	antithrombin deficiency	0	C0272375
thrombophilia due to antithrombin iii deficiency	SERPINC1	p.pro461leu	NA	ClinVar/OMIM	thrombophilia due to antithrombin iii deficiency	0	C0272375
thrombophilia due to antithrombin iii deficiency	SERPINC1	p.ser381pro	NA	ClinVar/OMIM	thrombophilia due to antithrombin iii deficiency	0	C0272375
thrombophilia due to antithrombin iii deficiency	SERPINC1	p.gly424asp	NA	ClinVar/OMIM	thrombophilia due to antithrombin iii deficiency	0	C0272375
antithrombin deficiency	SERPINC1	p.ala419val	NA	ClinVar/OMIM	antithrombin deficiency	0	C0272375
thrombophilia due to antithrombin iii deficiency	SERPINC1	p.ser148pro	NA	ClinVar/OMIM	thrombophilia due to antithrombin iii deficiency	0	C0272375
thrombophilia due to antithrombin iii deficiency	SERPINC1	p.leu23pro	NA	ClinVar/OMIM	thrombophilia due to antithrombin iii deficiency	0	C0272375
thrombophilia due to antithrombin iii deficiency	SERPINC1	p.asn167thr	NA	ClinVar/OMIM	thrombophilia due to antithrombin iii deficiency	0	C0272375
thrombophilia due to antithrombin iii deficiency	SERPINC1	p.asn219asp	NA	ClinVar/OMIM	thrombophilia due to antithrombin iii deficiency	0	C0272375
thrombophilia due to antithrombin iii deficiency	SERPINC1	p.ser223pro	NA	ClinVar/OMIM	thrombophilia due to antithrombin iii deficiency	0	C0272375
thrombophilia due to antithrombin iii deficiency	SERPINC1	p.cys127arg	NA	ClinVar/OMIM	thrombophilia due to antithrombin iii deficiency	0	C0272375
renal tubular dysgenesis	AGT	p.phe430fs	NA	ClinVar/OMIM	renal tubular dysgenesis	0	C0266313
myasthenic syndrome, congenital, 8	AGRN	p.gly1709arg	NA	ClinVar/OMIM	myasthenic syndrome, congenital, 8	0	C0751882
autoimmune lymphoproliferative syndrome	FASLG	p.arg156gly	NA	ClinVar/OMIM	autoimmune lymphoproliferative syndrome	0	C2750732;C2674723;C0349639;C1328840
macular degeneration	HTRA1	p.gly36=	NA	ClinVar/OMIM	macular degeneration	0	C1863534;C0339512;C2675210;C0024437	C
cold-induced sweating syndrome including crisponi syndrome	CRLF1	p.asn102fs	NA	ClinVar/OMIM	cold-induced sweating syndrome including crisponi syndrome	0	C0010412;C0024117;C0009264;C0234192;C0009443;C0041912
cold-induced sweating syndrome including crisponi syndrome	CRLF1	p.gln11fs	NA	ClinVar/OMIM	cold-induced sweating syndrome including crisponi syndrome	0	C0010412;C0024117;C0009264;C0234192;C0009443;C0041912
cold-induced sweating syndrome including crisponi syndrome	CRLF1	p.pro138leu	NA	ClinVar/OMIM	cold-induced sweating syndrome including crisponi syndrome	0	C0010412;C0024117;C0009264;C0234192;C0009443;C0041912
cold-induced sweating syndrome including crisponi syndrome	CRLF1	p.gln180ter	NA	ClinVar/OMIM	cold-induced sweating syndrome including crisponi syndrome	0	C0010412;C0024117;C0009264;C0234192;C0009443;C0041912
cold-induced sweating syndrome including crisponi syndrome	CRLF1	p.arg312his	NA	ClinVar/OMIM	cold-induced sweating syndrome including crisponi syndrome	0	C0010412;C0024117;C0009264;C0234192;C0009443;C0041912
fbln5-related cutis laxa	FBLN5	p.asp364tyr	NA	ClinVar/OMIM	fbln5-related cutis laxa	0	C1414541
cutis laxa, autosomal recessive, type ia	FBLN5	p.glu391ter	NA	ClinVar/OMIM	cutis laxa, autosomal recessive, type ia	0	C0268351;C0010495
cutis laxa, autosomal recessive, type ia	FBLN5	p.cys217arg	NA	ClinVar/OMIM	cutis laxa, autosomal recessive, type ia	0	C0268351;C0010495
crisponi/cold-induced sweating syndrome 2	CLCF1	p.cys16arg	NA	ClinVar/OMIM	crisponi/cold-induced sweating syndrome 2	0	C1853198
alport syndrome	COL4A5	p.gly365glu	NA	ClinVar/OMIM	alport syndrome	0	C1567743;C1567741
alport syndrome	COL4A5	p.455_457ppg[1]	NA	ClinVar/OMIM	alport syndrome	0	C1567743;C1567741
alport syndrome	COL4A5	p.gly722glu	NA	ClinVar/OMIM	alport syndrome	0	C1567743;C1567741
alport syndrome	COL4A5	p.gly763glu	NA	ClinVar/OMIM	alport syndrome	0	C1567743;C1567741
alport syndrome	COL4A5	p.823_825ppg[1]	NA	ClinVar/OMIM	alport syndrome	0	C1567743;C1567741
alport syndrome, x-linked recessive	COL4A5	p.gly869arg	NA	ClinVar/OMIM	alport syndrome, x-linked recessive	0	C1567741
alport syndrome	COL4A5	p.gly1060ter	NA	ClinVar/OMIM	alport syndrome	0	C1567743;C1567741
alport syndrome	COL4A5	p.gly1107arg	NA	ClinVar/OMIM	alport syndrome	0	C1567743;C1567741
alport syndrome	COL4A5	p.gly1116val	NA	ClinVar/OMIM	alport syndrome	0	C1567743;C1567741
alport syndrome	COL4A5	p.gly1427cys	NA	ClinVar/OMIM	alport syndrome	0	C1567743;C1567741
alport syndrome	COL4A5	p.?	NA	ClinVar/OMIM	alport syndrome	0	C1567743;C1567741
epidermolysis bullosa dystrophica inversa, autosomal recessive	COL7A1	p.gln2827ter	NA	ClinVar/OMIM	epidermolysis bullosa dystrophica inversa, autosomal recessive	0	C2673612;C0079474
transient bullous dermolysis of the newborn	COL7A1	p.gly1522glu	NA	ClinVar/OMIM	transient bullous dermolysis of the newborn	0	C0432322;C0079294;C1851573
polymicrogyria with vascular-type ehlers-danlos syndrome	COL3A1	p.lys161fs	NA	ClinVar/OMIM	polymicrogyria with vascular-type ehlers-danlos syndrome	0	C5193159	A
bethlem myopathy 1	COL6A2	p.glu624lys	NA	ClinVar/OMIM	bethlem myopathy 1	0	C1834674
ullrich congenital muscular dystrophy 1, autosomal recessive	COL6A2	p.arg876ser	NA	ClinVar/OMIM	ullrich congenital muscular dystrophy 1, autosomal recessive	0	C4225637	B
collagen vi-related myopathy	COL6A2	p.asp871asn	NA	ClinVar/OMIM	collagen vi-related myopathy	0	0
geleophysic dysplasia 2	FBN1	p.tyr1699cys	NA	ClinVar/OMIM	geleophysic dysplasia 2	0	C3489726;C3280054
geleophysic dysplasia 2	FBN1	p.ala1728thr	NA	ClinVar/OMIM	geleophysic dysplasia 2	0	C3489726;C3280054
geleophysic dysplasia 2	FBN1	p.tyr1696cys	NA	ClinVar/OMIM	geleophysic dysplasia 2	0	C3489726;C3280054
acromicric dysplasia	FBN1	p.ser1750arg	NA	ClinVar/OMIM	acromicric dysplasia	0	C0265287
acromicric dysplasia	FBN1	p.gln1735dup	NA	ClinVar/OMIM	acromicric dysplasia	0	C0265287
deafness, congenital, with inner ear agenesis, microtia, and microdontia	FGF3	p.tyr49cys	NA	ClinVar/OMIM	deafness, congenital, with inner ear agenesis, microtia, and microdontia	0	C1853144
deafness, congenital, with inner ear agenesis, microtia, and microdontia	FGF3	p.tyr106cys	NA	ClinVar/OMIM	deafness, congenital, with inner ear agenesis, microtia, and microdontia	0	C1853144
deafness, congenital, with inner ear agenesis, microtia, and microdontia	FGF3	p.trp153fs	NA	ClinVar/OMIM	deafness, congenital, with inner ear agenesis, microtia, and microdontia	0	C1853144
prss1-related hereditary pancreatitis	PRSS1	p.arg116cys	NA	ClinVar/OMIM	prss1-related hereditary pancreatitis	0	C1418965
megalocornea	CHRDL1	p.cys291fs	NA	ClinVar/OMIM	megalocornea	0	C0344530
megalocornea	CHRDL1	p.glu34fs	NA	ClinVar/OMIM	megalocornea	0	C0344530
3mc syndrome 1	MASP1	p.his497tyr	NA	ClinVar/OMIM	3mc syndrome 1	0	C0796059
3mc syndrome 1	MASP1	p.cys630arg	NA	ClinVar/OMIM	3mc syndrome 1	0	C0796059
3mc syndrome 1	MASP1	p.gly666glu	NA	ClinVar/OMIM	3mc syndrome 1	0	C0796059
cerebral arteriopathy, autosomal recessive, with subcortical infarcts and leukoencephalopathy	HTRA1	p.gly295arg	NA	ClinVar/OMIM	cerebral arteriopathy, autosomal recessive, with subcortical infarcts and leukoencephalopathy	0	C1838577
inflammatory skin and bowel disease, neonatal, 1 (1 family)	ADAM17	p.asp201fs	NA	ClinVar/OMIM	inflammatory skin and bowel disease, neonatal, 1	0	C4751120	C
candidiasis, familial, 6 (1 family)	IL17F	p.ser95leu	NA	ClinVar/OMIM	candidiasis, familial, 6	0	C0006840
raine syndrome	FAM20C	p.pro328ser	NA	ClinVar/OMIM	raine syndrome	0	C1850106
amelogenesis imperfecta, type ig	FAM20A	p.arg136ter	NA	ClinVar/OMIM	amelogenesis imperfecta, type ig	0	C2931783
myopathy, areflexia, respiratory distress, and dysphagia, early-onset	MEGF10	p.trp520ter	NA	ClinVar/OMIM	myopathy, areflexia, respiratory distress, and dysphagia, early-onset	0	C3280679
myopathy, areflexia, respiratory distress, and dysphagia, early-onset	MEGF10	p.tyr1048ter	NA	ClinVar/OMIM	myopathy, areflexia, respiratory distress, and dysphagia, early-onset	0	C3280679
myopathy, areflexia, respiratory distress, and dysphagia, early-onset	MEGF10	p.pro442fs	NA	ClinVar/OMIM	myopathy, areflexia, respiratory distress, and dysphagia, early-onset	0	C3280679
3mc syndrome 2	COLEC11	p.gly204ser	NA	ClinVar/OMIM	3mc syndrome 2	0	C0796279
ectodermal dysplasia 1, hypohidrotic/hair/tooth type, x-linked	EDA	p.arg276cys	NA	ClinVar/OMIM	ectodermal dysplasia 1, hypohidrotic/hair/tooth type, x-linked	0	C3539920;C0162359
amelogenesis imperfecta, type ig	FAM20A	p.leu12fs	NA	ClinVar/OMIM	amelogenesis imperfecta, type ig	0	C2931783
amelogenesis imperfecta, type ig	FAM20A	p.arg392fs	NA	ClinVar/OMIM	amelogenesis imperfecta, type ig	0	C2931783
amelogenesis imperfecta, type ig	FAM20A	p.arg276ter	NA	ClinVar/OMIM	amelogenesis imperfecta, type ig	0	C2931783
marfan syndrome	FBN1	p.arg545his	NA	ClinVar/OMIM	marfan syndrome	0	C3541518;C0024796	A
marfan syndrome/loeys-dietz syndrome/familial thoracic aortic aneurysms and dissections	FBN1	p.gly2627arg	NA	ClinVar/OMIM	marfan syndrome/loeys-dietz syndrome/familial thoracic aortic aneurysms and dissections	0	C0024796	A
ullrich congenital muscular dystrophy 1, autosomal recessive	COL6A2	p.val619_ile620del	NA	ClinVar/OMIM	ullrich congenital muscular dystrophy 1, autosomal recessive	0	C4225637	B
cryptorchidism	INSL3	p.arg73ter	NA	ClinVar/OMIM	cryptorchidism	0	C0010417;C0010418
weill-marchesani syndrome 3 (1 family)	LTBP2	p.val1177met	NA	ClinVar/OMIM	weill-marchesani syndrome 3	0	C3553785;C0265313
lama2-related muscular dystrophy	LAMA2	p.his2627gln	NA	ClinVar/OMIM	lama2-related muscular dystrophy	0	C1416776	B
congenital deafness with labyrinthine aplasia, microtia, and microdontia	FGF3	p.arg132fs	NA	ClinVar/OMIM	congenital deafness with labyrinthine aplasia, microtia, and microdontia	0	C1853144
diaphyseal dysplasia	TGFB1	p.leu11_leu13dup	NA	ClinVar/OMIM	diaphyseal dysplasia	0	C0011989
ichthyosis, congenital, autosomal recessive 1	TGM1	p.phe435fs	NA	ClinVar/OMIM	ichthyosis, congenital, autosomal recessive 1	0	C0079154;C0020758
ichthyosis, congenital, autosomal recessive 1	TGM1	p.leu205gln	NA	ClinVar/OMIM	ichthyosis, congenital, autosomal recessive 1	0	C0079154;C0020758
ichthyosis, congenital, autosomal recessive 1	TGM1	p.val359met	NA	ClinVar/OMIM	ichthyosis, congenital, autosomal recessive 1	0	C0079154;C0020758
ichthyosis, congenital, autosomal recessive 1	TGM1	p.arg396his	NA	ClinVar/OMIM	ichthyosis, congenital, autosomal recessive 1	0	C0079154;C0020758
carpenter syndrome 2	MEGF8	p.arg1566his	NA	ClinVar/OMIM	carpenter syndrome 2	0	C3554247;C1275078
carpenter syndrome 2	MEGF8	p.ser2434gly	NA	ClinVar/OMIM	carpenter syndrome 2	0	C3554247;C1275078
marfanoid-progeroid-lipodystrophy syndrome	FBN1	p.lys2719fs	NA	ClinVar/OMIM	marfanoid-progeroid-lipodystrophy syndrome	0	C4310796	A
pseudoachondroplasia	COMP	p.glu583lys	NA	ClinVar/OMIM	pseudoachondroplasia	0	C4310949;C0410538
pseudoachondroplasia	COMP	p.thr585lys	NA	ClinVar/OMIM	pseudoachondroplasia	0	C4310949;C0410538
multiple epiphyseal dysplasia, dominant	COMP	p.thr585arg	NA	ClinVar/OMIM	multiple epiphyseal dysplasia, dominant	0	C0026760
multiple epiphyseal dysplasia, dominant	COMP	p.thr585met	NA	ClinVar/OMIM	multiple epiphyseal dysplasia, dominant	0	C0026760
pseudoachondroplasia	COMP	p.gly719ser	NA	ClinVar/OMIM	pseudoachondroplasia	0	C4310949;C0410538
marfan syndrome	FBN1	p.gly1418fs	NA	ClinVar/OMIM	marfan syndrome	0	C3541518;C0024796	A
osteogenesis imperfecta, type ii	COL1A1	p.thr1416fs	NA	ClinVar/OMIM	osteogenesis imperfecta, type ii	0	C0268358
osteogenesis imperfecta, type ii	COL1A1	p.ala1387val	NA	ClinVar/OMIM	osteogenesis imperfecta, type ii	0	C0268358
osteogenesis imperfecta, type vi	SERPINF1	p.val40fs	NA	ClinVar/OMIM	osteogenesis imperfecta, type vi	0	C3279564;C0029434
lissencephaly 5	LAMB1	p.lys1049_gln1053delinsprovalleuvalserserter	NA	ClinVar/OMIM	lissencephaly 5	0	C3554657	B
spinocerebellar ataxia 35	TGM6	p.asp510his	NA	ClinVar/OMIM	spinocerebellar ataxia 35	0	C3888031;C0087012
osteogenesis imperfecta, type xv	WNT1	p.glu189ter	NA	ClinVar/OMIM	osteogenesis imperfecta, type xv	0	C0029434
osteogenesis imperfecta, type xv	WNT1	p.ser317fs	NA	ClinVar/OMIM	osteogenesis imperfecta, type xv	0	C0029434
osteogenesis imperfecta, type xv	WNT1	p.val355phe	NA	ClinVar/OMIM	osteogenesis imperfecta, type xv	0	C0029434
osteoporosis, early-onset, susceptibility to	WNT1	p.arg235trp	NA	ClinVar/OMIM	osteoporosis, early-onset, susceptibility to	0	C0029456	C
dilated cardiomyopathy 1jj	LAMA4	p.arg1080ter	NA	ClinVar/OMIM	dilated cardiomyopathy 1jj	0	C3808935
cardiomyopathy, dilated, 1jj	LAMA4	p.pro950leu	NA	ClinVar/OMIM	cardiomyopathy, dilated, 1jj	0	C0007193
unverricht-lundborg syndrome	CSTB	p.ser42ter	NA	ClinVar/OMIM	unverricht-lundborg syndrome	0	C0751785;C0751778
unverricht-lundborg syndrome	CSTB	p.lys56=	NA	ClinVar/OMIM	unverricht-lundborg syndrome	0	C0751785;C0751778
progressive myoclonic epilepsy	CSTB	p.leu73fs	NA	ClinVar/OMIM	progressive myoclonic epilepsy	0	C0751785;C0751778
unverricht-lundborg syndrome	CSTB	p.gln22=	NA	ClinVar/OMIM	unverricht-lundborg syndrome	0	C0751785;C0751778
cornea plana 2	KERA	p.asn131asp	NA	ClinVar/OMIM	cornea plana 2	0	C1857574
cornea plana 2	KERA	p.arg279ter	NA	ClinVar/OMIM	cornea plana 2	0	C1857574
leber congenital amaurosis 17	GDF6	p.glu292asp	NA	ClinVar/OMIM	leber congenital amaurosis 17	0	C3715164
variant of unknown significance	FBLN1	p.cys397phe	NA	ClinVar/OMIM	variant of unknown significance	0	C2986382
ceroid lipofuscinosis, neuronal, 13, kufs type	CTSF	p.gln321arg	NA	ClinVar/OMIM	ceroid lipofuscinosis, neuronal, 13, kufs type	0	C0027877
multiple epiphyseal dysplasia, dominant	COMP	p.asn386del	NA	ClinVar/OMIM	multiple epiphyseal dysplasia, dominant	0	C0026760
multiple epiphyseal dysplasia, dominant	COMP	p.asn555lys	NA	ClinVar/OMIM	multiple epiphyseal dysplasia, dominant	0	C0026760
multiple epiphyseal dysplasia, dominant	COMP	p.asp605asn	NA	ClinVar/OMIM	multiple epiphyseal dysplasia, dominant	0	C0026760
multiple epiphyseal dysplasia, dominant	COMP	p.ser681cys	NA	ClinVar/OMIM	multiple epiphyseal dysplasia, dominant	0	C0026760
multiple epiphyseal dysplasia, dominant	COMP	p.arg718pro	NA	ClinVar/OMIM	multiple epiphyseal dysplasia, dominant	0	C0026760
multiple epiphyseal dysplasia, dominant	MATN3	p.thr120met	NA	ClinVar/OMIM	multiple epiphyseal dysplasia, dominant	0	C0026760
holoprosencephaly	SHH	p.asp405_gly409del	NA	ClinVar/OMIM	holoprosencephaly	0	C1835819;C0079541
holoprosencephaly	SHH	p.val13fs	NA	ClinVar/OMIM	holoprosencephaly	0	C1835819;C0079541
intellectual disability	HCFC1	p.ala73val	NA	ClinVar/OMIM	intellectual disability	0	C3150924;C3714756
odontoonychodermal dysplasia	WNT10A	p.glu95lys	NA	ClinVar/OMIM	odontoonychodermal dysplasia	0	C0796093;C0013575
junctional epidermolysis bullosa gravis of herlitz	LAMC2	p.gln864ter	NA	ClinVar/OMIM	junctional epidermolysis bullosa gravis of herlitz	0	C0079683
junctional epidermolysis bullosa gravis of herlitz	LAMB3	p.asp384asn	NA	ClinVar/OMIM	junctional epidermolysis bullosa gravis of herlitz	0	C0079683
loeys-dietz syndrome 5	TGFB3	p.cys409tyr	NA	ClinVar/OMIM	loeys-dietz syndrome 5	0	C3810012
hypobetalipoproteinemia, familial, 2	ANGPTL3	p.ile19fs	NA	ClinVar/OMIM	hypobetalipoproteinemia, familial, 2	0	C1857970
hypobetalipoproteinemia, familial, 2	ANGPTL3	p.thr146_asn147inster	NA	ClinVar/OMIM	hypobetalipoproteinemia, familial, 2	0	C1857970
hypobetalipoproteinemia, familial, 2	ANGPTL3	p.asn121fs	NA	ClinVar/OMIM	hypobetalipoproteinemia, familial, 2	0	C1857970
hypobetalipoproteinemia, familial, 2	ANGPTL3	p.phe295leu	NA	ClinVar/OMIM	hypobetalipoproteinemia, familial, 2	0	C1857970
congenital muscular dystrophy, lama2-related	LAMA2	p.arg919leu	NA	ClinVar/OMIM	congenital muscular dystrophy, lama2-related	0	C0699743	B
laminin alpha 2-related dystrophy	LAMA2	p.phe2184ser	NA	ClinVar/OMIM	laminin alpha 2-related dystrophy	0	C0532236;C1416776
congenital muscular dystrophy, lama2-related	LAMA2	p.ser2188asn	NA	ClinVar/OMIM	congenital muscular dystrophy, lama2-related	0	C0699743	B
laminin alpha 2-related dystrophy	LAMA2	p.ser277leu	NA	ClinVar/OMIM	laminin alpha 2-related dystrophy	0	C0532236;C1416776
stickler syndrome, dominant	COL2A1	p.gly891=	NA	ClinVar/OMIM	stickler syndrome, dominant	0	C2020284;C0265253
myosclerosis	COL6A2	p.thr899=	NA	ClinVar/OMIM	myosclerosis	0	C1611706
bethlem myopathy 1	COL6A2	p.val921met	NA	ClinVar/OMIM	bethlem myopathy 1	0	C1834674
collagen type vi-related disorders	COL6A3	p.ala830ser	NA	ClinVar/OMIM	collagen type vi-related disorders	0	C0009336
collagen type vi-related disorders	COL6A3	p.ile1437=	NA	ClinVar/OMIM	collagen type vi-related disorders	0	C0009336
collagen type vi-related disorders	COL6A3	p.asp1501=	NA	ClinVar/OMIM	collagen type vi-related disorders	0	C0009336
collagen type vi-related disorders	COL6A3	p.arg2549trp	NA	ClinVar/OMIM	collagen type vi-related disorders	0	C0009336
deafness, autosomal dominant 56	TNC	p.thr1796ser	NA	ClinVar/OMIM	deafness, autosomal dominant 56	0	C0011053;C0018772
neuronal ceroid lipofuscinosis	CTSD	p.ser157leu	NA	ClinVar/OMIM	neuronal ceroid lipofuscinosis	0	C2673257;C0027877;C4017260
ichthyosis, congenital, autosomal recessive 11	ST14	p.leu678fs	NA	ClinVar/OMIM	ichthyosis, congenital, autosomal recessive 11	0	C0079583;C0079154;C0020758
congenital disorder of deglycosylation	NGLY1	p.arg542ter	NA	ClinVar/OMIM	congenital disorder of deglycosylation	0	C3808991
renal hypodysplasia/aplasia 2 (1 family)	FGF20	p.val113fs	NA	ClinVar/OMIM	renal hypodysplasia/aplasia 2	0	C4016935
myasthenic syndrome, congenital, 8	AGRN	p.val1727phe	NA	ClinVar/OMIM	myasthenic syndrome, congenital, 8	0	C0751882
myasthenic syndrome, congenital, 8	AGRN	p.gln353ter	NA	ClinVar/OMIM	myasthenic syndrome, congenital, 8	0	C0751882
primary open angle glaucoma	LTBP2	p.arg495gln	NA	ClinVar/OMIM	primary open angle glaucoma	0	C0339573	C
marfan''s syndrome	LTBP2	p.arg548ter	NA	ClinVar/OMIM	marfan''s syndrome	0	C0024796	A
pseudoexfoliation glaucoma	LTBP2	p.ile667leu	NA	ClinVar/OMIM	pseudoexfoliation glaucoma	0	C0206368	C
weill-marchesani syndrome	LTBP2	p.glu1191lys	NA	ClinVar/OMIM	weill-marchesani syndrome	0	C0265313
primary open angle glaucoma	LTBP2	p.gln1417arg	NA	ClinVar/OMIM	primary open angle glaucoma	0	C0339573	C
primary open angle glaucoma	LTBP2	p.pro1556=	NA	ClinVar/OMIM	primary open angle glaucoma	0	C0339573	C
primary open angle glaucoma	LTBP2	p.val1638met	NA	ClinVar/OMIM	primary open angle glaucoma	0	C0339573	C
glaucoma 3, primary congenital, d	LTBP2	p.cys1793fs	NA	ClinVar/OMIM	glaucoma 3, primary congenital, d	0	C2751316;C1562061;C1533041	C
marfan''s syndrome	FBN1	p.cys129gly	NA	ClinVar/OMIM	marfan''s syndrome	0	C0024796	A
lamellar ichthyosis	TGM1	p.thr541pro	NA	ClinVar/OMIM	lamellar ichthyosis	0	C0079154
congenital contractural arachnodactyly	FBN2	p.gly721ser	NA	ClinVar/OMIM	congenital contractural arachnodactyly	0	C0220668
allhighlypenetrant	LAMC3	p.arg770gly	NA	ClinVar/OMIM	allhighlypenetrant	0	0
allhighlypenetrant	LAMC3	p.pro174=	NA	ClinVar/OMIM	allhighlypenetrant	0	0
allhighlypenetrant	LAMC3	p.ala285=	NA	ClinVar/OMIM	allhighlypenetrant	0	0
lissencephaly, recessive	RELN	p.met1_glu2insglygly	NA	ClinVar/OMIM	lissencephaly, recessive	0	C0266463	B
lissencephaly 2 (norman-roberts type)	RELN	p.tyr1731ter	NA	ClinVar/OMIM	lissencephaly 2	0	C0796089	B
lissencephaly 2 (norman-roberts type)	RELN	p.ile1737fs	NA	ClinVar/OMIM	lissencephaly 2	0	C0796089	B
lissencephaly 2	RELN	p.arg2637cys	NA	ClinVar/OMIM	lissencephaly 2	0	C0796089	B
lissencephaly 2	RELN	p.his812asp	NA	ClinVar/OMIM	lissencephaly 2	0	C0796089	B
lissencephaly 2	RELN	p.asp1636gly	NA	ClinVar/OMIM	lissencephaly 2	0	C0796089	B
lissencephaly 2	RELN	p.glu1699lys	NA	ClinVar/OMIM	lissencephaly 2	0	C0796089	B
lissencephaly 2	RELN	p.arg2242ser	NA	ClinVar/OMIM	lissencephaly 2	0	C0796089	B
allhighlypenetrant	RELN	p.thr2933ile	NA	ClinVar/OMIM	allhighlypenetrant	0	0
allhighlypenetrant	INSL6	p.val567ala	NA	ClinVar/OMIM	allhighlypenetrant	0	0
allhighlypenetrant	INSL6	p.his671tyr	NA	ClinVar/OMIM	allhighlypenetrant	0	0
allhighlypenetrant	INSL6	p.cys961ser	NA	ClinVar/OMIM	allhighlypenetrant	0	0
allhighlypenetrant	INSL6	p.ile136leu	NA	ClinVar/OMIM	allhighlypenetrant	0	0
allhighlypenetrant	INSL6	p.ser241arg	NA	ClinVar/OMIM	allhighlypenetrant	0	0
ehlers-danlos syndrome, type viia	COL5A1	p.pro1494=	NA	ClinVar/OMIM	ehlers-danlos syndrome, type viia	0	C0013720	A
ehlers-danlos syndrome, type 1	COL5A1	p.pro1566=	NA	ClinVar/OMIM	ehlers-danlos syndrome, type 1	0	C0268335	A
seizures	CTSD	p.pro51=	NA	ClinVar/OMIM	seizures	0	C0036572	B
neuronal ceroid lipofuscinosis	CTSD	p.thr98=	NA	ClinVar/OMIM	neuronal ceroid lipofuscinosis	0	C2673257;C0027877;C4017260
amelogenesis imperfecta, hypomaturation type, iia2	MMP20	p.his226gln	NA	ClinVar/OMIM	amelogenesis imperfecta, hypomaturation type, iia2	0	C0399372
amelogenesis imperfecta, hypomaturation type, iia2	MMP20	p.trp34ter	NA	ClinVar/OMIM	amelogenesis imperfecta, hypomaturation type, iia2	0	C0399372
amelogenesis imperfecta, type ig	FAM20A	p.arg478ter	NA	ClinVar/OMIM	amelogenesis imperfecta, type ig	0	C2931783
amelogenesis imperfecta, type ig	FAM20A	p.leu205fs	NA	ClinVar/OMIM	amelogenesis imperfecta, type ig	0	C2931783
lymphatic malformation 4	VEGFC	p.pro191fs	NA	ClinVar/OMIM	lymphatic malformation 4	0	C4747769
anterior segment dysgenesis 7	PXDN	p.cys857fs	NA	ClinVar/OMIM	anterior segment dysgenesis 7	0	C3151617
anterior segment dysgenesis 7	PXDN	p.leu792fs	NA	ClinVar/OMIM	anterior segment dysgenesis 7	0	C3151617
platyspondylic lethal skeletal dysplasia torrance type	COL2A1	p.cys1315gly	NA	ClinVar/OMIM	platyspondylic lethal skeletal dysplasia torrance type	0	C1835437
poretti-boltshauser syndrome	LAMA1	p.tyr939fs	NA	ClinVar/OMIM	poretti-boltshauser syndrome	0	C4014821
poretti-boltshauser syndrome	LAMA1	p.tyr185ter	NA	ClinVar/OMIM	poretti-boltshauser syndrome	0	C4014821
vesicoureteral reflux 8	TNXB	p.thr3257ile	NA	ClinVar/OMIM	vesicoureteral reflux 8	0	C4014831
vesicoureteral reflux 8	TNXB	p.gly1331arg	NA	ClinVar/OMIM	vesicoureteral reflux 8	0	C4014831
cerebral autosomal recessive arteriopathy with subcortical infarcts and leukoencephalopathy	HTRA1	p.arg274gln	NA	ClinVar/OMIM	cerebral autosomal recessive arteriopathy with subcortical infarcts and leukoencephalopathy	0	C1838577;C0270612
cerebral autosomal recessive arteriopathy with subcortical infarcts and leukoencephalopathy	HTRA1	p.pro285leu	NA	ClinVar/OMIM	cerebral autosomal recessive arteriopathy with subcortical infarcts and leukoencephalopathy	0	C1838577;C0270612
cerebral autosomal recessive arteriopathy with subcortical infarcts and leukoencephalopathy	HTRA1	p.leu364pro	NA	ClinVar/OMIM	cerebral autosomal recessive arteriopathy with subcortical infarcts and leukoencephalopathy	0	C1838577;C0270612
autoimmune lymphoproliferative syndrome	FASLG	p.phe88fs	NA	ClinVar/OMIM	autoimmune lymphoproliferative syndrome	0	C2750732;C2674723;C0349639;C1328840
epidermolysis bullosa dystrophica, autosomal recessive	COL7A1	p.gly1815arg	NA	ClinVar/OMIM	epidermolysis bullosa dystrophica, autosomal recessive	0	C0079474;C0014527
peeling skin syndrome 2	TGM5	p.ser604fs	NA	ClinVar/OMIM	peeling skin syndrome 2	0	C1853354
marfan syndrome	FBN1	p.ser2832gly	NA	ClinVar/OMIM	marfan syndrome	0	C3541518;C0024796	A
marfan syndrome	FBN1	p.ile2616val	NA	ClinVar/OMIM	marfan syndrome	0	C3541518;C0024796	A
marfan syndrome	FBN1	p.arg2694gln	NA	ClinVar/OMIM	marfan syndrome	0	C3541518;C0024796	A
antithrombin deficiency	SERPINC1	p.ala296pro	NA	ClinVar/OMIM	antithrombin deficiency	0	C0272375
progressive myoclonic epilepsy	CSTB	p.gln46ter	NA	ClinVar/OMIM	progressive myoclonic epilepsy	0	C0751785;C0751778
unverricht-lundborg syndrome	CSTB	p.gly50glu	NA	ClinVar/OMIM	unverricht-lundborg syndrome	0	C0751785;C0751778
variant of unknown significance	COL9A3	p.gln393fs	NA	ClinVar/OMIM	variant of unknown significance	0	C2986382
malignant tumor of prostate	COL5A1	p.pro1019ala	NA	ClinVar/OMIM	malignant tumor of prostate	0	C0376358;C0034341	C
malignant tumor of prostate	FBN2	p.glu2059asp	NA	ClinVar/OMIM	malignant tumor of prostate	0	C0376358;C0034341	C
malignant tumor of prostate	MUC6	p.thr1461ile	NA	ClinVar/OMIM	malignant tumor of prostate	0	C0376358;C0034341	C
malignant tumor of prostate	IMPG2	p.pro422leu	NA	ClinVar/OMIM	malignant tumor of prostate	0	C0376358;C0034341	C
malignant tumor of prostate	NTN4	p.his275tyr	NA	ClinVar/OMIM	malignant tumor of prostate	0	C0376358;C0034341	C
malignant tumor of prostate	LMAN1L	p.lys446asn	NA	ClinVar/OMIM	malignant tumor of prostate	0	C0376358;C0034341	C
malignant tumor of prostate	ITIH5	p.asp849tyr	NA	ClinVar/OMIM	malignant tumor of prostate	0	C0376358;C0034341	C
malignant tumor of prostate	HMCN1	p.arg5598ter	NA	ClinVar/OMIM	malignant tumor of prostate	0	C0376358;C0034341	C
malignant tumor of prostate	MXRA5	p.ala1930thr	NA	ClinVar/OMIM	malignant tumor of prostate	0	C0376358;C0034341	C
malignant tumor of prostate	ADAMTS3	p.gly22ter	NA	ClinVar/OMIM	malignant tumor of prostate	0	C0376358;C0034341	C
malignant tumor of prostate	FREM2	p.arg1166his	NA	ClinVar/OMIM	malignant tumor of prostate	0	C0376358;C0034341	C
brain small vessel disease 1 with ocular anomalies	COL4A1	p.gly755arg	NA	ClinVar/OMIM	brain small vessel disease 1 with ocular anomalies	0	C5193158
brain small vessel disease 1 with ocular anomalies	COL4A1	p.gly773arg	NA	ClinVar/OMIM	brain small vessel disease 1 with ocular anomalies	0	C5193158
brain small vessel disease 1 with ocular anomalies	COL4A1	p.asn1627lys	NA	ClinVar/OMIM	brain small vessel disease 1 with ocular anomalies	0	C5193158
brain small vessel disease 1 with ocular anomalies	COL4A1	p.gly708arg	NA	ClinVar/OMIM	brain small vessel disease 1 with ocular anomalies	0	C5193158
macular dystrophy, vitelliform, 4	IMPG1	p.leu238arg	NA	ClinVar/OMIM	macular dystrophy, vitelliform, 4	0	C0339510
macular dystrophy, vitelliform, 4	IMPG1	p.arg507ter	NA	ClinVar/OMIM	macular dystrophy, vitelliform, 4	0	C0339510
macular dystrophy, vitelliform, 4	IMPG1	p.leu154pro	NA	ClinVar/OMIM	macular dystrophy, vitelliform, 4	0	C0339510
macular dystrophy, vitelliform, 5	IMPG2	p.cys1077phe	NA	ClinVar/OMIM	macular dystrophy, vitelliform, 5	0	C0339510
bethlem myopathy 1	COL6A2	p.gly286glu	NA	ClinVar/OMIM	bethlem myopathy 1	0	C1834674
bethlem myopathy 1	COL6A3	p.lys1014glu	NA	ClinVar/OMIM	bethlem myopathy 1	0	C1834674
bethlem myopathy 1	COL6A3	p.ala769thr	NA	ClinVar/OMIM	bethlem myopathy 1	0	C1834674
laminin alpha 2-related dystrophy	LAMA2	p.ser146phe	NA	ClinVar/OMIM	laminin alpha 2-related dystrophy	0	C0532236;C1416776
laminin alpha 2-related dystrophy	LAMA2	p.arg2630ter	NA	ClinVar/OMIM	laminin alpha 2-related dystrophy	0	C0532236;C1416776
laminin alpha 2-related dystrophy	LAMA2	p.arg2897gln	NA	ClinVar/OMIM	laminin alpha 2-related dystrophy	0	C0532236;C1416776
laminin alpha 2-related dystrophy	LAMA2	p.gln3049glu	NA	ClinVar/OMIM	laminin alpha 2-related dystrophy	0	C0532236;C1416776
robinow syndrome	WNT5A	p.cys182ser	NA	ClinVar/OMIM	robinow syndrome	0	C0265205
bethlem myopathy 1	COL6A3	p.arg1504trp	NA	ClinVar/OMIM	bethlem myopathy 1	0	C1834674
merosin deficient congenital muscular dystrophy	LAMA2	p.leu11pro	NA	ClinVar/OMIM	merosin deficient congenital muscular dystrophy	0	C1263858	B
amelogenesis imperfecta, type ia	LAMB3	p.gly1149fs	NA	ClinVar/OMIM	amelogenesis imperfecta, type ia	0	C0002452
amelogenesis imperfecta, type ia	LAMB3	p.ser1144ter	NA	ClinVar/OMIM	amelogenesis imperfecta, type ia	0	C0002452
fibrosis of extraocular muscles, congenital, 5	COL25A1	p.gly382arg	NA	ClinVar/OMIM	fibrosis of extraocular muscles, congenital, 5	0	C1302995	C
fibrosis of extraocular muscles, congenital, 5	COL25A1	p.gly497ter	NA	ClinVar/OMIM	fibrosis of extraocular muscles, congenital, 5	0	C1302995	C
hyperpigmentation with or without hypopigmentation, familial progressive	KITLG	p.val33ala	NA	ClinVar/OMIM	hyperpigmentation with or without hypopigmentation, familial progressive	0	C1840392
hyperpigmentation with or without hypopigmentation, familial progressive	KITLG	p.thr34pro	NA	ClinVar/OMIM	hyperpigmentation with or without hypopigmentation, familial progressive	0	C1840392
hyperekplexia	CTSD	p.ile390_gly391insmetglyaspvalphe	NA	ClinVar/OMIM	hyperekplexia	0	C3553288;C0234166
diabetes insipidus	MATN4	p.gly172ala	NA	ClinVar/OMIM	diabetes insipidus	0	C0011848	B
dysmorphic facies	FAM20C	p.arg409cys	NA	ClinVar/OMIM	dysmorphic facies	0	C0424503
cerebral ischemia	FBN2	p.gly355asp	NA	ClinVar/OMIM	cerebral ischemia	0	C0917798;C0007785
antithrombin iii deficiency	SERPINC1	p.phe155del	NA	ClinVar/OMIM	antithrombin iii deficiency	0	C0272375
junctional epidermolysis bullosa gravis of herlitz	LAMB3	p.arg569ter	NA	ClinVar/OMIM	junctional epidermolysis bullosa gravis of herlitz	0	C0079683
junctional epidermolysis bullosa gravis of herlitz	LAMC2	p.arg223ter	NA	ClinVar/OMIM	junctional epidermolysis bullosa gravis of herlitz	0	C0079683
junctional epidermolysis bullosa gravis of herlitz	LAMB3	p.ser155fs	NA	ClinVar/OMIM	junctional epidermolysis bullosa gravis of herlitz	0	C0079683
amelogenesis imperfecta, hypomaturation type, iia2	MMP20	p.his204arg	NA	ClinVar/OMIM	amelogenesis imperfecta, hypomaturation type, iia2	0	C0399372
bladder exstrophy and epispadias complex	WNT3	p.cys91arg	NA	ClinVar/OMIM	bladder exstrophy and epispadias complex	0	C1838703
bladder exstrophy and epispadias complex	WNT3	p.gly213asp	NA	ClinVar/OMIM	bladder exstrophy and epispadias complex	0	C1838703
bladder exstrophy and epispadias complex	WNT11	p.arg316his	NA	ClinVar/OMIM	bladder exstrophy and epispadias complex	0	C1838703
bladder exstrophy and epispadias complex	WNT6	p.arg190=	NA	ClinVar/OMIM	bladder exstrophy and epispadias complex	0	C1838703
spinocerebellar ataxia 35	TGM6	p.arg111cys	NA	ClinVar/OMIM	spinocerebellar ataxia 35	0	C3888031;C0087012
spinocerebellar ataxia 35	TGM6	p.glu574del	NA	ClinVar/OMIM	spinocerebellar ataxia 35	0	C3888031;C0087012
hirschsprung disease 1	FBN1	p.arg516gln	NA	ClinVar/OMIM	hirschsprung disease 1	0	C0019569;C2931876;C3888239
ehlers-danlos syndrome due to tenascin-x deficiency	TNXB	p.cys4060trp	NA	ClinVar/OMIM	ehlers-danlos syndrome due to tenascin-x deficiency	0	C1848029	A
ehlers-danlos syndrome due to tenascin-x deficiency	TNXB	p.arg4075his	NA	ClinVar/OMIM	ehlers-danlos syndrome due to tenascin-x deficiency	0	C1848029	A
bethlem myopathy 1	COL6A3	p.ala2554thr	NA	ClinVar/OMIM	bethlem myopathy 1	0	C1834674
collagen type vi-related disorders	COL6A3	p.arg2501his	NA	ClinVar/OMIM	collagen type vi-related disorders	0	C0009336
laminin alpha 2-related dystrophy	LAMA2	p.ala5thr	NA	ClinVar/OMIM	laminin alpha 2-related dystrophy	0	C0532236;C1416776
bethlem myopathy 1	COL6A2	p.asp446asn	NA	ClinVar/OMIM	bethlem myopathy 1	0	C1834674
bethlem myopathy 1	COL6A3	p.arg137gln	NA	ClinVar/OMIM	bethlem myopathy 1	0	C1834674
ehlers-danlos syndrome, type 1	COL5A2	p.pro701thr	NA	ClinVar/OMIM	ehlers-danlos syndrome, type 1	0	C0268335	A
bethlem myopathy 1	COL6A2	p.gly244arg	NA	ClinVar/OMIM	bethlem myopathy 1	0	C1834674
bethlem myopathy 1	COL6A3	p.ala3163thr	NA	ClinVar/OMIM	bethlem myopathy 1	0	C1834674
lissencephaly 2	RELN	p.lys3100del	NA	ClinVar/OMIM	lissencephaly 2	0	C0796089	B
bethlem myopathy 1	COL6A3	p.pro815his	NA	ClinVar/OMIM	bethlem myopathy 1	0	C1834674
rolandic epilepsy with mental retardation and speech dyspraxia, x-linked	SRPX2	p.gln307arg	NA	ClinVar/OMIM	rolandic epilepsy with mental retardation and speech dyspraxia, x-linked	0	C1845070
bethlem myopathy 1	COL6A3	p.arg1308gln	NA	ClinVar/OMIM	bethlem myopathy 1	0	C1834674
epilepsy, familial temporal lobe, 7	RELN	p.his798asn	NA	ClinVar/OMIM	epilepsy, familial temporal lobe, 7	0	C1842564
epilepsy, familial temporal lobe, 7	RELN	p.gly2783cys	NA	ClinVar/OMIM	epilepsy, familial temporal lobe, 7	0	C1842564
epilepsy, familial temporal lobe, 7	RELN	p.asp763gly	NA	ClinVar/OMIM	epilepsy, familial temporal lobe, 7	0	C1842564
epilepsy, familial temporal lobe, 7	RELN	p.glu3176lys	NA	ClinVar/OMIM	epilepsy, familial temporal lobe, 7	0	C1842564
thoracic aortic aneurysms and aortic dissections	COL3A1	p.gly748ser	NA	ClinVar/OMIM	thoracic aortic aneurysms and aortic dissections	0	0
marfan syndrome	FBN1	p.gly214ser	NA	ClinVar/OMIM	marfan syndrome	0	C3541518;C0024796	A
marfan syndrome	FBN1	p.gly518val	NA	ClinVar/OMIM	marfan syndrome	0	C3541518;C0024796	A
marfan syndrome	FBN1	p.ala691pro	NA	ClinVar/OMIM	marfan syndrome	0	C3541518;C0024796	A
thoracic aortic aneurysm and aortic dissection	FBN1	p.cys769tyr	NA	ClinVar/OMIM	thoracic aortic aneurysm and aortic dissection	0	0
thoracic aortic aneurysm and aortic dissection	FBN1	p.gly880ser	NA	ClinVar/OMIM	thoracic aortic aneurysm and aortic dissection	0	0
marfan syndrome	FBN1	p.ala882val	NA	ClinVar/OMIM	marfan syndrome	0	C3541518;C0024796	A
marfan syndrome	FBN1	p.gly985arg	NA	ClinVar/OMIM	marfan syndrome	0	C3541518;C0024796	A
marfan syndrome	FBN1	p.asp1155asn	NA	ClinVar/OMIM	marfan syndrome	0	C3541518;C0024796	A
marfan syndrome	FBN1	p.asp1199gly	NA	ClinVar/OMIM	marfan syndrome	0	C3541518;C0024796	A
marfan syndrome	FBN1	p.tyr1699ter	NA	ClinVar/OMIM	marfan syndrome	0	C3541518;C0024796	A
marfan syndrome	FBN1	p.glu1811lys	NA	ClinVar/OMIM	marfan syndrome	0	C3541518;C0024796	A
thoracic aortic aneurysm and aortic dissection	FBN1	p.gly1815ser	NA	ClinVar/OMIM	thoracic aortic aneurysm and aortic dissection	0	0
marfan syndrome	FBN1	p.arg2057ter	NA	ClinVar/OMIM	marfan syndrome	0	C3541518;C0024796	A
marfan syndrome	FBN1	p.gly2140arg	NA	ClinVar/OMIM	marfan syndrome	0	C3541518;C0024796	A
marfan syndrome	FBN1	p.arg2150leu	NA	ClinVar/OMIM	marfan syndrome	0	C3541518;C0024796	A
marfan syndrome	FBN1	p.pro2233ser	NA	ClinVar/OMIM	marfan syndrome	0	C3541518;C0024796	A
marfan syndrome	FBN1	p.arg2306his	NA	ClinVar/OMIM	marfan syndrome	0	C3541518;C0024796	A
marfan syndrome	FBN1	p.arg2335trp	NA	ClinVar/OMIM	marfan syndrome	0	C3541518;C0024796	A
marfan syndrome	FBN1	p.gln2477arg	NA	ClinVar/OMIM	marfan syndrome	0	C3541518;C0024796	A
marfan syndrome	FBN1	p.asn2533ser	NA	ClinVar/OMIM	marfan syndrome	0	C3541518;C0024796	A
marfan syndrome	FBN1	p.phe2817val	NA	ClinVar/OMIM	marfan syndrome	0	C3541518;C0024796	A
marfan syndrome	FBN1	p.thr2826ser	NA	ClinVar/OMIM	marfan syndrome	0	C3541518;C0024796	A
marfan syndrome	FBN1	p.asp2860gly	NA	ClinVar/OMIM	marfan syndrome	0	C3541518;C0024796	A
marfan syndrome	FBN1	p.gly77arg	NA	ClinVar/OMIM	marfan syndrome	0	C3541518;C0024796	A
marfan syndrome	FBN1	p.glu383lys	NA	ClinVar/OMIM	marfan syndrome	0	C3541518;C0024796	A
marfan syndrome	FBN1	p.ile1909thr	NA	ClinVar/OMIM	marfan syndrome	0	C3541518;C0024796	A
thoracic aortic aneurysm and aortic dissection	FBN1	p.tyr2670cys	NA	ClinVar/OMIM	thoracic aortic aneurysm and aortic dissection	0	0
loeys-dietz syndrome 5	TGFB3	p.asn235fs	NA	ClinVar/OMIM	loeys-dietz syndrome 5	0	C3810012
loeys-dietz syndrome 5	TGFB3	p.asp263his	NA	ClinVar/OMIM	loeys-dietz syndrome 5	0	C3810012
dental anomalies and short stature	LTBP3	p.cys620fs	NA	ClinVar/OMIM	dental anomalies and short stature	0	C1832594
progressive myoclonic epilepsy	CSTB	p.val65ile	NA	ClinVar/OMIM	progressive myoclonic epilepsy	0	C0751785;C0751778
neuronal ceroid lipofuscinosis	CTSD	p.ser5thr	NA	ClinVar/OMIM	neuronal ceroid lipofuscinosis	0	C2673257;C0027877;C4017260
neuronal ceroid lipofuscinosis	CTSD	p.arg266cys	NA	ClinVar/OMIM	neuronal ceroid lipofuscinosis	0	C2673257;C0027877;C4017260
seizures	CTSD	p.arg309his	NA	ClinVar/OMIM	seizures	0	C0036572	B
autosomal dominant epilepsy with auditory features	LGI1	p.thr90met	NA	ClinVar/OMIM	autosomal dominant epilepsy with auditory features	0	C1838062
autosomal dominant epilepsy with auditory features	LGI1	p.pro91leu	NA	ClinVar/OMIM	autosomal dominant epilepsy with auditory features	0	C1838062
rolandic epilepsy with mental retardation and speech dyspraxia, x-linked	SRPX2	p.asn400ser	NA	ClinVar/OMIM	rolandic epilepsy with mental retardation and speech dyspraxia, x-linked	0	C1845070
long qt syndrome	PRSS12	p.glu506lys	NA	ClinVar/OMIM	long qt syndrome	0	C2678484;C0023976
long qt syndrome	NOV	p.ser202ter	NA	ClinVar/OMIM	long qt syndrome	0	C2678484;C0023976
spondyloepiphyseal dysplasia, congenital type	COL2A1	p.gly1101arg	NA	ClinVar/OMIM	spondyloepiphyseal dysplasia, congenital type	0	C2745959
childhood onset schizophrenia	FREM2	p.arg2784lys	NA	ClinVar/OMIM	childhood onset schizophrenia	0	C0036346	B
epilepsy, familial temporal lobe, 7	RELN	p.pro844leu	NA	ClinVar/OMIM	epilepsy, familial temporal lobe, 7	0	C1842564
cyclical neutropenia	ELANE	p.ala18pro	NA	ClinVar/OMIM	cyclical neutropenia	0	C0221023
severe congenital neutropenia autosomal dominant	ELANE	p.cys187ter	NA	ClinVar/OMIM	severe congenital neutropenia autosomal dominant	0	C0340970
ehlers-danlos-like syndrome due to tenascin-x deficiency	TNXB	p.arg1666ter	NA	ClinVar/OMIM	ehlers-danlos-like syndrome due to tenascin-x deficiency	0	C1848029	A
inborn genetic diseases	COL7A1	p.gly2242arg	NA	ClinVar/OMIM	inborn genetic diseases	0	C0950123
inborn genetic diseases	HCFC1	p.gly1954arg	NA	ClinVar/OMIM	inborn genetic diseases	0	C0950123
inborn genetic diseases	LAMA1	p.tyr2624his	NA	ClinVar/OMIM	inborn genetic diseases	0	C0950123
epithelial recurrent erosion dystrophy	COL17A1	p.thr939ile	NA	ClinVar/OMIM	epithelial recurrent erosion dystrophy	0	C1852551
epithelial recurrent erosion dystrophy	COL17A1	p.gly1052=	NA	ClinVar/OMIM	epithelial recurrent erosion dystrophy	0	C1852551
osteogenesis imperfecta type i	COL1A1	p.gly956arg	NA	ClinVar/OMIM	osteogenesis imperfecta type i	0	C0023931;C0268363
ehlers-danlos syndrome, classic type	COL5A1	p.pro136ser	NA	ClinVar/OMIM	ehlers-danlos syndrome, classic type	0	C4225429	A
ehlers-danlos-like syndrome due to tenascin-x deficiency	TNXB	p.arg3213gly	NA	ClinVar/OMIM	ehlers-danlos-like syndrome due to tenascin-x deficiency	0	C1848029	A
poretti-boltshauser syndrome	LAMA1	p.pro2234fs	NA	ClinVar/OMIM	poretti-boltshauser syndrome	0	C4014821
bethlem myopathy 1	COL6A2	p.ala878val	NA	ClinVar/OMIM	bethlem myopathy 1	0	C1834674
myopathy	COL6A2	p.gly298arg	NA	ClinVar/OMIM	myopathy	0	C0026848
myopathy	COL6A3	p.arg2061ter	NA	ClinVar/OMIM	myopathy	0	C0026848
lissencephaly 2 (norman-roberts type)	RELN	p.gly111fs	NA	ClinVar/OMIM	lissencephaly 2	0	C0796089	B
lissencephaly 2 (norman-roberts type)	RELN	p.gln1863ter	NA	ClinVar/OMIM	lissencephaly 2	0	C0796089	B
ehlers-danlos syndrome, classic type	COL5A1	p.gly530=	NA	ClinVar/OMIM	ehlers-danlos syndrome, classic type	0	C4225429	A
ehlers-danlos syndrome, type 1	COL5A1	p.pro1302leu	NA	ClinVar/OMIM	ehlers-danlos syndrome, type 1	0	C0268335	A
ehlers-danlos syndrome, type 1	COL5A1	p.thr144met	NA	ClinVar/OMIM	ehlers-danlos syndrome, type 1	0	C0268335	A
ehlers-danlos syndrome, type 1	COL5A1	p.arg503cys	NA	ClinVar/OMIM	ehlers-danlos syndrome, type 1	0	C0268335	A
ehlers-danlos syndrome, type 1	COL5A1	p.ala532val	NA	ClinVar/OMIM	ehlers-danlos syndrome, type 1	0	C0268335	A
ehlers-danlos syndrome, type 1	COL5A1	p.pro602leu	NA	ClinVar/OMIM	ehlers-danlos syndrome, type 1	0	C0268335	A
ehlers-danlos syndrome, classic type	COL5A1	p.pro705leu	NA	ClinVar/OMIM	ehlers-danlos syndrome, classic type	0	C4225429	A
ehlers-danlos syndrome, type 1	COL5A1	p.val1068gly	NA	ClinVar/OMIM	ehlers-danlos syndrome, type 1	0	C0268335	A
ehlers-danlos syndrome, type 1	COL5A1	p.ala1356=	NA	ClinVar/OMIM	ehlers-danlos syndrome, type 1	0	C0268335	A
ehlers-danlos syndrome, type 1	COL5A1	p.pro1388ser	NA	ClinVar/OMIM	ehlers-danlos syndrome, type 1	0	C0268335	A
ehlers-danlos syndrome, type 1	COL5A1	p.pro1436leu	NA	ClinVar/OMIM	ehlers-danlos syndrome, type 1	0	C0268335	A
ehlers-danlos syndrome, type 1	COL5A1	p.gly1492ser	NA	ClinVar/OMIM	ehlers-danlos syndrome, type 1	0	C0268335	A
ehlers-danlos syndrome, type 1	COL5A1	p.ala1589thr	NA	ClinVar/OMIM	ehlers-danlos syndrome, type 1	0	C0268335	A
ehlers-danlos syndrome, type 1	COL5A1	p.arg1627trp	NA	ClinVar/OMIM	ehlers-danlos syndrome, type 1	0	C0268335	A
ehlers-danlos syndrome, type 1	COL5A1	p.pro252ser	NA	ClinVar/OMIM	ehlers-danlos syndrome, type 1	0	C0268335	A
ehlers-danlos syndrome, type 1	COL5A1	p.arg449trp	NA	ClinVar/OMIM	ehlers-danlos syndrome, type 1	0	C0268335	A
ehlers-danlos syndrome, type 1	COL5A1	p.pro657leu	NA	ClinVar/OMIM	ehlers-danlos syndrome, type 1	0	C0268335	A
ehlers-danlos syndrome, type 1	COL5A1	p.arg912ter	NA	ClinVar/OMIM	ehlers-danlos syndrome, type 1	0	C0268335	A
ehlers-danlos syndrome, type 1	COL5A1	p.ala1356val	NA	ClinVar/OMIM	ehlers-danlos syndrome, type 1	0	C0268335	A
ehlers-danlos syndrome, type 1	COL5A1	p.arg1392lys	NA	ClinVar/OMIM	ehlers-danlos syndrome, type 1	0	C0268335	A
ehlers-danlos syndrome, type 1	COL5A1	p.val1602met	NA	ClinVar/OMIM	ehlers-danlos syndrome, type 1	0	C0268335	A
ehlers-danlos syndrome, type 1	COL5A2	p.ala914val	NA	ClinVar/OMIM	ehlers-danlos syndrome, type 1	0	C0268335	A
ehlers-danlos syndrome, type 1	COL5A2	p.arg527cys	NA	ClinVar/OMIM	ehlers-danlos syndrome, type 1	0	C0268335	A
ehlers-danlos syndrome, type 1	COL5A2	p.pro659=	NA	ClinVar/OMIM	ehlers-danlos syndrome, type 1	0	C0268335	A
ehlers-danlos syndrome, type 1	COL5A2	p.arg1060trp	NA	ClinVar/OMIM	ehlers-danlos syndrome, type 1	0	C0268335	A
ehlers-danlos syndrome, type 1	COL5A2	p.pro1103leu	NA	ClinVar/OMIM	ehlers-danlos syndrome, type 1	0	C0268335	A
ehlers-danlos syndrome, type 1	COL5A2	p.gly1484asp	NA	ClinVar/OMIM	ehlers-danlos syndrome, type 1	0	C0268335	A
ehlers-danlos syndrome, type 1	COL5A2	p.pro88his	NA	ClinVar/OMIM	ehlers-danlos syndrome, type 1	0	C0268335	A
ehlers-danlos syndrome, type 1	COL5A2	p.gly126ser	NA	ClinVar/OMIM	ehlers-danlos syndrome, type 1	0	C0268335	A
ehlers-danlos syndrome, type 1	COL5A2	p.leu803ser	NA	ClinVar/OMIM	ehlers-danlos syndrome, type 1	0	C0268335	A
ehlers-danlos syndrome, type 1	COL5A2	p.arg1001cys	NA	ClinVar/OMIM	ehlers-danlos syndrome, type 1	0	C0268335	A
congenital contractural arachnodactyly	FBN2	p.ala23gly	NA	ClinVar/OMIM	congenital contractural arachnodactyly	0	C0220668
congenital contractural arachnodactyly	FBN2	p.arg1099his	NA	ClinVar/OMIM	congenital contractural arachnodactyly	0	C0220668
congenital contractural arachnodactyly	FBN2	p.arg1473his	NA	ClinVar/OMIM	congenital contractural arachnodactyly	0	C0220668
congenital contractural arachnodactyly	FBN2	p.asn2002asp	NA	ClinVar/OMIM	congenital contractural arachnodactyly	0	C0220668
congenital contractural arachnodactyly	FBN2	p.leu2809pro	NA	ClinVar/OMIM	congenital contractural arachnodactyly	0	C0220668
congenital contractural arachnodactyly	FBN2	p.arg394his	NA	ClinVar/OMIM	congenital contractural arachnodactyly	0	C0220668
congenital contractural arachnodactyly	FBN2	p.pro1623ala	NA	ClinVar/OMIM	congenital contractural arachnodactyly	0	C0220668
congenital contractural arachnodactyly	FBN2	p.lys2112glu	NA	ClinVar/OMIM	congenital contractural arachnodactyly	0	C0220668
congenital contractural arachnodactyly	FBN2	p.val2696met	NA	ClinVar/OMIM	congenital contractural arachnodactyly	0	C0220668
congenital contractural arachnodactyly	FBN2	p.asp2893val	NA	ClinVar/OMIM	congenital contractural arachnodactyly	0	C0220668
dilated cardiomyopathy 1jj	LAMA4	p.val277ile	NA	ClinVar/OMIM	dilated cardiomyopathy 1jj	0	C3808935
cardiomyopathy	LAMA4	p.lys607=	NA	ClinVar/OMIM	cardiomyopathy	0	C0878544;C0349788
cardiomyopathy	LAMA4	p.his310asp	NA	ClinVar/OMIM	cardiomyopathy	0	C0878544;C0349788
holt-oram syndrome	TGFB2	p.arg299trp	NA	ClinVar/OMIM	holt-oram syndrome	0	C1623209;C0265264
antithrombin iii deficiency	SERPINC1	p.arg215=	NA	ClinVar/OMIM	antithrombin iii deficiency	0	C0272375
crisponi/cold-induced sweating syndrome 1	CRLF1	p.pro239fs	NA	ClinVar/OMIM	crisponi/cold-induced sweating syndrome 1	0	C1848947
tumoral calcinosis, familial, hyperphosphatemic	FGF23	p.gly87asp	NA	ClinVar/OMIM	tumoral calcinosis, familial, hyperphosphatemic	0	C1876187	C
ichthyosis	TGM1	p.trp455arg	NA	ClinVar/OMIM	ichthyosis	0	C0079588;C0020757
otitis media, susceptibility to	A2ML1	p.arg893ter	NA	ClinVar/OMIM	otitis media, susceptibility to	0	C0029882
macular degeneration, age-related, 1	HMCN1	p.pro1388fs	NA	ClinVar/OMIM	macular degeneration, age-related, 1	0	C0242383	C
megalocornea	CHRDL1	p.his270fs	NA	ClinVar/OMIM	megalocornea	0	C0344530
deafness, autosomal recessive 53	COL11A2	p.pro781thr	NA	ClinVar/OMIM	deafness, autosomal recessive 53	0	C1864746
laminin alpha 2-related dystrophy	LAMA2	p.arg242his	NA	ClinVar/OMIM	laminin alpha 2-related dystrophy	0	C0532236;C1416776
deafness, autosomal dominant 69	KITLG	p.leu95_ser96inster	NA	ClinVar/OMIM	deafness, autosomal dominant 69	0	C0011053;C0018772
deafness, autosomal dominant 69	KITLG	p.his67_cys68delinsarg	NA	ClinVar/OMIM	deafness, autosomal dominant 69	0	C0011053;C0018772
variant of unknown significance	KITLG	p.leu104val	NA	ClinVar/OMIM	variant of unknown significance	0	C2986382
myasthenic syndrome, congenital, 19	COL13A1	p.leu392fs	NA	ClinVar/OMIM	myasthenic syndrome, congenital, 19	0	C0751882
thoracic aortic aneurysm and aortic dissection	FBN1	p.glu1852gly	NA	ClinVar/OMIM	thoracic aortic aneurysm and aortic dissection	0	0
cerebral arteriopathy, autosomal dominant, with subcortical infarcts and leukoencephalopathy, type 2	HTRA1	p.arg166leu	NA	ClinVar/OMIM	cerebral arteriopathy, autosomal dominant, with subcortical infarcts and leukoencephalopathy, type 2	0	C0751587
cerebral arteriopathy, autosomal dominant, with subcortical infarcts and leukoencephalopathy, type 2	HTRA1	p.ala173pro	NA	ClinVar/OMIM	cerebral arteriopathy, autosomal dominant, with subcortical infarcts and leukoencephalopathy, type 2	0	C0751587
cerebral arteriopathy, autosomal dominant, with subcortical infarcts and leukoencephalopathy, type 2	HTRA1	p.ser284arg	NA	ClinVar/OMIM	cerebral arteriopathy, autosomal dominant, with subcortical infarcts and leukoencephalopathy, type 2	0	C0751587
ngly1-cddg	NGLY1	p.trp535ter	NA	ClinVar/OMIM	ngly1-cddg	0	C1425023
ngly1-cddg	NGLY1	p.gln208ter	NA	ClinVar/OMIM	ngly1-cddg	0	C1425023
ngly1-cddg	NGLY1	p.ser116ter	NA	ClinVar/OMIM	ngly1-cddg	0	C1425023
ngly1-cddg	NGLY1	p.arg390pro	NA	ClinVar/OMIM	ngly1-cddg	0	C1425023
ngly1-cddg	NGLY1	p.trp244arg	NA	ClinVar/OMIM	ngly1-cddg	0	C1425023
ngly1-cddg	NGLY1	p.ser636_leu637inster	NA	ClinVar/OMIM	ngly1-cddg	0	C1425023
ngly1-cddg	NGLY1	p.gly310=	NA	ClinVar/OMIM	ngly1-cddg	0	C1425023
variant of unknown significance	SEMA3E	p.arg619cys	NA	ClinVar/OMIM	variant of unknown significance	0	C2986382
microphthalmia cataract, sclerocornea	WNT7A	p.arg78cys	NA	ClinVar/OMIM	microphthalmia cataract, sclerocornea	0	0	C
colobomatous microphthalmia, corpus callosum hypoplasia, heart defect	SULF1	p.gly177ser	NA	ClinVar/OMIM	colobomatous microphthalmia, corpus callosum hypoplasia, heart defect	0	C4255043	C
microphthalmia sclerocornea, psychomotor delay	ADAM17	p.arg283cys	NA	ClinVar/OMIM	microphthalmia sclerocornea, psychomotor delay	0	0
microphthalmia sclerocornea, psychomotor delay	SFRP2	p.asp209gly	NA	ClinVar/OMIM	microphthalmia sclerocornea, psychomotor delay	0	0
lipid proteinosis	ECM1	p.gln276ter	NA	ClinVar/OMIM	lipid proteinosis	0	C0023795;C0264511
lipid proteinosis	ECM1	p.gly170fs	NA	ClinVar/OMIM	lipid proteinosis	0	C0023795;C0264511
lipid proteinosis	ECM1	p.arg243ter	NA	ClinVar/OMIM	lipid proteinosis	0	C0023795;C0264511
lipid proteinosis	ECM1	p.cys220gly	NA	ClinVar/OMIM	lipid proteinosis	0	C0023795;C0264511
lipid proteinosis	ECM1	p.arg31_gln32delinsserter	NA	ClinVar/OMIM	lipid proteinosis	0	C0023795;C0264511
crisponi/cold-induced sweating syndrome 1	CRLF1	p.val282fs	NA	ClinVar/OMIM	crisponi/cold-induced sweating syndrome 1	0	C1848947
congenital muscular dystrophy	COL6A3	p.arg2422ter	NA	ClinVar/OMIM	congenital muscular dystrophy	0	C0699743	B
progressive sensorineural hearing impairment	DPT	p.arg182cys	NA	ClinVar/OMIM	progressive sensorineural hearing impairment	0	C1843156
spondyloepimetaphyseal dysplasia, stanescu type	COL2A1	p.gly207arg	NA	ClinVar/OMIM	spondyloepimetaphyseal dysplasia, stanescu type	0	C0432211
inborn genetic diseases	NID1	p.thr547ile	NA	ClinVar/OMIM	inborn genetic diseases	0	C0950123
hemophilia b, factor ix deficiency	F9	p.val257ile	NA	ClinVar/OMIM	hemophilia b, factor ix deficiency	0	C0008533
high molecular weight kininogen deficiency	KNG1	p.ser623fs	NA	ClinVar/OMIM	high molecular weight kininogen deficiency	0	C0272340
bone fragility with contractures, arterial rupture, and deafness	PLOD3	p.tyr630ter	NA	ClinVar/OMIM	bone fragility with contractures, arterial rupture, and deafness	0	C2676285
familial pulmonary fibrosis	SFTPC	p.val39leu	NA	ClinVar/OMIM	familial pulmonary fibrosis	0	0	C
cornea plana 2	KERA	p.ile107arg	NA	ClinVar/OMIM	cornea plana 2	0	C1857574
marfanoid-progeroid-lipodystrophy syndrome	FBN1	p.arg2726fs	NA	ClinVar/OMIM	marfanoid-progeroid-lipodystrophy syndrome	0	C4310796	A
dentin dysplasia, type i, with extreme microdontia and misshapen teeth	SMOC2	p.cys227ter	NA	ClinVar/OMIM	dentin dysplasia, type i, with extreme microdontia and misshapen teeth	0	C0399379
lissencephaly 5	LAMB1	p.gln977fs	NA	ClinVar/OMIM	lissencephaly 5	0	C3554657	B
lissencephaly 5	LAMB1	p.cys481phe	NA	ClinVar/OMIM	lissencephaly 5	0	C3554657	B
congenital contractural arachnodactyly	FBN2	p.ser1102gly	NA	ClinVar/OMIM	congenital contractural arachnodactyly	0	C0220668
congenital contractural arachnodactyly	FBN2	p.phe2686leu	NA	ClinVar/OMIM	congenital contractural arachnodactyly	0	C0220668
semilobar holoprosencephaly	FGF8	p.ala95glu	NA	ClinVar/OMIM	semilobar holoprosencephaly	0	C0751617
semilobar holoprosencephaly	FGF8	p.thr108met	NA	ClinVar/OMIM	semilobar holoprosencephaly	0	C0751617
holoprosencephaly	FGF8	p.arg118ter	NA	ClinVar/OMIM	holoprosencephaly	0	C1835819;C0079541
holoprosencephaly	FGF8	p.arg195gln	NA	ClinVar/OMIM	holoprosencephaly	0	C1835819;C0079541
laminin alpha 2-related dystrophy	LAMA2	p.arg435ter	NA	ClinVar/OMIM	laminin alpha 2-related dystrophy	0	C0532236;C1416776
retinal dystrophy	IMPG2	p.glu1212ter	NA	ClinVar/OMIM	retinal dystrophy	0	C3151086;C0854723
retinal dystrophy	IMPG2	p.ser804_ala805inster	NA	ClinVar/OMIM	retinal dystrophy	0	C3151086;C0854723
retinal dystrophy	IMPG2	p.asp23fs	NA	ClinVar/OMIM	retinal dystrophy	0	C3151086;C0854723
marfan syndrome	FBN1	p.gly2091asp	NA	ClinVar/OMIM	marfan syndrome	0	C3541518;C0024796	A
marfan syndrome	FBN1	p.arg2726gln	NA	ClinVar/OMIM	marfan syndrome	0	C3541518;C0024796	A
holt-oram syndrome	TGFB2	p.arg302ser	NA	ClinVar/OMIM	holt-oram syndrome	0	C1623209;C0265264
hypertension	COL4A5	p.gly564arg	NA	ClinVar/OMIM	hypertension	0	C4015866;C0020538	C
bethlem myopathy 1	COL6A2	p.arg843trp	NA	ClinVar/OMIM	bethlem myopathy 1	0	C1834674
spondyloepimetaphyseal dysplasia, x-linked	BGN	p.lys147glu	NA	ClinVar/OMIM	spondyloepimetaphyseal dysplasia, x-linked	0	C1848097
spondyloepimetaphyseal dysplasia, x-linked	BGN	p.gly259val	NA	ClinVar/OMIM	spondyloepimetaphyseal dysplasia, x-linked	0	C1848097
diarrhea 9	WNT2B	p.arg105ter	NA	ClinVar/OMIM	diarrhea 9	0	C4748517
ulna and fibula absence of with severe limb deficiency	WNT7A	p.arg102trp	NA	ClinVar/OMIM	ulna and fibula absence of with severe limb deficiency	0	C1848651;C1856728
tooth agenesis, selective, x-linked, 1	EDA	p.ala259glu	NA	ClinVar/OMIM	tooth agenesis, selective, x-linked, 1	0	C1970757;C0020608
hypohidrotic x-linked ectodermal dysplasia	EDA	p.arg289cys	NA	ClinVar/OMIM	hypohidrotic x-linked ectodermal dysplasia	0	C0162359;C3539920
ectodermal dysplasia 1, hypohidrotic/hair/tooth type, x-linked	EDA	p.his252leu	NA	ClinVar/OMIM	ectodermal dysplasia 1, hypohidrotic/hair/tooth type, x-linked	0	C3539920;C0162359
tooth agenesis, selective, 8	WNT10B	p.arg211gln	NA	ClinVar/OMIM	tooth agenesis, selective, 8	0	C4082304
tooth agenesis, selective, 8	WNT10B	p.trp262ter	NA	ClinVar/OMIM	tooth agenesis, selective, 8	0	C4082304
myopathy, myofibrillar, 7	KY	p.tyr135ter	NA	ClinVar/OMIM	myopathy, myofibrillar, 7	0	C2678065
myopathy, myofibrillar, 7	KY	p.thr358fs	NA	ClinVar/OMIM	myopathy, myofibrillar, 7	0	C2678065
congenital ichthyosis	TGM1	p.gly382=	NA	ClinVar/OMIM	congenital ichthyosis	0	C0079583;C0079154;C0020758
connective tissue disorder	COL2A1	p.gly429=	NA	ClinVar/OMIM	connective tissue disorder	0	C2676285;C0009782
stickler syndrome, recessive	COL9A2	p.val396=	NA	ClinVar/OMIM	stickler syndrome, recessive	0	C2020284;C0265253
multiple epiphyseal dysplasia, dominant	COL9A3	p.ala606thr	NA	ClinVar/OMIM	multiple epiphyseal dysplasia, dominant	0	C0026760
congenital contractural arachnodactyly	FBN2	p.arg788his	NA	ClinVar/OMIM	congenital contractural arachnodactyly	0	C0220668
fraser syndrome	FRAS1	p.asp687gly	NA	ClinVar/OMIM	fraser syndrome	0	C0265233	A
knobloch syndrome	COL18A1	p.pro459=	NA	ClinVar/OMIM	knobloch syndrome	0	C1849409
fraser syndrome	FREM2	p.glu192=	NA	ClinVar/OMIM	fraser syndrome	0	C0265233	A
thoracic aortic aneurysms and aortic dissections	FBN2	p.gly297=	NA	ClinVar/OMIM	thoracic aortic aneurysms and aortic dissections	0	0
marfan syndrome	FBN1	p.glu2570lys	NA	ClinVar/OMIM	marfan syndrome	0	C3541518;C0024796	A
congenital contractural arachnodactyly	FBN2	p.cys602fs	NA	ClinVar/OMIM	congenital contractural arachnodactyly	0	C0220668
marfan syndrome/loeys-dietz syndrome/familial thoracic aortic aneurysms and dissections	FBN1	p.cys1791tyr	NA	ClinVar/OMIM	marfan syndrome/loeys-dietz syndrome/familial thoracic aortic aneurysms and dissections	0	C0024796	A
marfan syndrome	FBN1	p.met1230thr	NA	ClinVar/OMIM	marfan syndrome	0	C3541518;C0024796	A
congenital contractural arachnodactyly	FBN2	p.pro1469=	NA	ClinVar/OMIM	congenital contractural arachnodactyly	0	C0220668
congenital contractural arachnodactyly	FBN2	p.ile574val	NA	ClinVar/OMIM	congenital contractural arachnodactyly	0	C0220668
marfan syndrome	FBN1	p.gly2195arg	NA	ClinVar/OMIM	marfan syndrome	0	C3541518;C0024796	A
marfan syndrome	FBN1	p.asn1168ser	NA	ClinVar/OMIM	marfan syndrome	0	C3541518;C0024796	A
marfan syndrome	FBN1	p.cys377arg	NA	ClinVar/OMIM	marfan syndrome	0	C3541518;C0024796	A
acute aortic dissections	FBN1	p.pro698leu	NA	ClinVar/OMIM	acute aortic dissections	0	C0241868
ehlers-danlos syndrome, type 1	COL5A1	p.gly997=	NA	ClinVar/OMIM	ehlers-danlos syndrome, type 1	0	C0268335	A
odontoonychodermal dysplasia	WNT10A	p.ala131thr	NA	ClinVar/OMIM	odontoonychodermal dysplasia	0	C0796093;C0013575
odontoonychodermal dysplasia	WNT10A	p.arg248ter	NA	ClinVar/OMIM	odontoonychodermal dysplasia	0	C0796093;C0013575
laminin alpha 2-related dystrophy	LAMA2	p.glu1792ter	NA	ClinVar/OMIM	laminin alpha 2-related dystrophy	0	C0532236;C1416776
laminin alpha 2-related dystrophy	LAMA2	p.arg1826ter	NA	ClinVar/OMIM	laminin alpha 2-related dystrophy	0	C0532236;C1416776
osteogenesis imperfecta type i	COL1A1	p.arg253ter	NA	ClinVar/OMIM	osteogenesis imperfecta type i	0	C0023931;C0268363
osteogenesis imperfecta type i	COL1A1	p.arg469ter	NA	ClinVar/OMIM	osteogenesis imperfecta type i	0	C0023931;C0268363
osteogenesis imperfecta type i	COL1A1	p.gly560ser	NA	ClinVar/OMIM	osteogenesis imperfecta type i	0	C0023931;C0268363
bethlem myopathy 1	COL6A2	p.arg965pro	NA	ClinVar/OMIM	bethlem myopathy 1	0	C1834674
osteogenesis imperfecta, type x	SERPINH1	p.met237thr	NA	ClinVar/OMIM	osteogenesis imperfecta, type x	0	C3151211;C0029434
acute aortic dissections	LOX	p.ser280ile	NA	ClinVar/OMIM	acute aortic dissections	0	C0241868
acute aortic dissections	LOX	p.gln267pro	NA	ClinVar/OMIM	acute aortic dissections	0	C0241868
lethal congenital contracture syndrome 11	GLDN	p.pro253fs	NA	ClinVar/OMIM	lethal congenital contracture syndrome 11	0	C4310670
lethal congenital contracture syndrome 11	GLDN	p.ala32glu	NA	ClinVar/OMIM	lethal congenital contracture syndrome 11	0	C4310670
lethal congenital contracture syndrome 11	GLDN	p.arg479ter	NA	ClinVar/OMIM	lethal congenital contracture syndrome 11	0	C4310670
variant of unknown significance	PLAT	p.arg35fs	NA	ClinVar/OMIM	variant of unknown significance	0	C2986382
marfan syndrome	FBN1	p.phe675fs	NA	ClinVar/OMIM	marfan syndrome	0	C3541518;C0024796	A
ehlers-danlos syndrome, type 1	COL5A1	p.arg1133ter	NA	ClinVar/OMIM	ehlers-danlos syndrome, type 1	0	C0268335	A
bethlem myopathy 1	COL6A3	p.arg97his	NA	ClinVar/OMIM	bethlem myopathy 1	0	C1834674
bethlem myopathy 1	COL6A2	p.thr987met	NA	ClinVar/OMIM	bethlem myopathy 1	0	C1834674
bethlem myopathy 1	COL6A2	p.gly499glu	NA	ClinVar/OMIM	bethlem myopathy 1	0	C1834674
bethlem myopathy 1	COL6A2	p.arg933his	NA	ClinVar/OMIM	bethlem myopathy 1	0	C1834674
bethlem myopathy 1	COL6A2	p.arg95his	NA	ClinVar/OMIM	bethlem myopathy 1	0	C1834674
bethlem myopathy 1	COL6A2	p.asp354asn	NA	ClinVar/OMIM	bethlem myopathy 1	0	C1834674
bethlem myopathy 1	COL6A3	p.arg740his	NA	ClinVar/OMIM	bethlem myopathy 1	0	C1834674
bethlem myopathy 1	COL6A3	p.val1067met	NA	ClinVar/OMIM	bethlem myopathy 1	0	C1834674
bethlem myopathy 1	COL6A3	p.phe1284leu	NA	ClinVar/OMIM	bethlem myopathy 1	0	C1834674
bethlem myopathy 1	COL6A3	p.glu2067lys	NA	ClinVar/OMIM	bethlem myopathy 1	0	C1834674
bethlem myopathy 1	COL6A2	p.gln194arg	NA	ClinVar/OMIM	bethlem myopathy 1	0	C1834674
cryptophthalmos, unilateral or bilateral, isolated	FREM2	p.arg2167trp	NA	ClinVar/OMIM	cryptophthalmos, unilateral or bilateral, isolated	0	C0311249
ehlers-danlos syndrome, hydroxylysine-deficient	PLOD1	p.arg111fs	NA	ClinVar/OMIM	ehlers-danlos syndrome, hydroxylysine-deficient	0	C0268342	A
lissencephaly 2	RELN	p.his570asp	NA	ClinVar/OMIM	lissencephaly 2	0	C0796089	B
bethlem myopathy 1	COL6A2	p.leu974=	NA	ClinVar/OMIM	bethlem myopathy 1	0	C1834674
bethlem myopathy 1	COL6A3	p.val1040ile	NA	ClinVar/OMIM	bethlem myopathy 1	0	C1834674
bethlem myopathy 1	COL6A2	p.val929met	NA	ClinVar/OMIM	bethlem myopathy 1	0	C1834674
bethlem myopathy 1	COL6A3	p.ala1111thr	NA	ClinVar/OMIM	bethlem myopathy 1	0	C1834674
bethlem myopathy 1	COL6A2	p.val984met	NA	ClinVar/OMIM	bethlem myopathy 1	0	C1834674
bethlem myopathy 1	COL6A3	p.gly1879ser	NA	ClinVar/OMIM	bethlem myopathy 1	0	C1834674
bethlem myopathy 1	COL6A3	p.ala1560thr	NA	ClinVar/OMIM	bethlem myopathy 1	0	C1834674
bethlem myopathy 1	COL6A2	p.pro357=	NA	ClinVar/OMIM	bethlem myopathy 1	0	C1834674
laminin alpha 2-related dystrophy	LAMA2	p.arg1706ter	NA	ClinVar/OMIM	laminin alpha 2-related dystrophy	0	C0532236;C1416776
bethlem myopathy 1	COL6A3	p.gly1673=	NA	ClinVar/OMIM	bethlem myopathy 1	0	C1834674
bethlem myopathy 1	COL6A2	p.glu959gln	NA	ClinVar/OMIM	bethlem myopathy 1	0	C1834674
bethlem myopathy 1	COL6A3	p.arg1301trp	NA	ClinVar/OMIM	bethlem myopathy 1	0	C1834674
bethlem myopathy 1	COL6A2	p.asp751asn	NA	ClinVar/OMIM	bethlem myopathy 1	0	C1834674
bethlem myopathy 1	COL6A2	p.pro449arg	NA	ClinVar/OMIM	bethlem myopathy 1	0	C1834674
bethlem myopathy 1	COL6A3	p.ala2257thr	NA	ClinVar/OMIM	bethlem myopathy 1	0	C1834674
bethlem myopathy 1	COL6A3	p.gly2214ser	NA	ClinVar/OMIM	bethlem myopathy 1	0	C1834674
bethlem myopathy 1	COL6A2	p.ala904val	NA	ClinVar/OMIM	bethlem myopathy 1	0	C1834674
congenital contractural arachnodactyly	FBN2	p.ala2328ser	NA	ClinVar/OMIM	congenital contractural arachnodactyly	0	C0220668
bethlem myopathy 1	COL6A3	p.thr236ile	NA	ClinVar/OMIM	bethlem myopathy 1	0	C1834674
bethlem myopathy 1	COL6A3	p.glu2453lys	NA	ClinVar/OMIM	bethlem myopathy 1	0	C1834674
bethlem myopathy 1	COL6A3	p.ala1124val	NA	ClinVar/OMIM	bethlem myopathy 1	0	C1834674
bethlem myopathy 1	COL6A3	p.gly2300glu	NA	ClinVar/OMIM	bethlem myopathy 1	0	C1834674
bethlem myopathy 1	COL6A2	p.glu182gly	NA	ClinVar/OMIM	bethlem myopathy 1	0	C1834674
marshall syndrome	COL11A1	p.pro1668leu	NA	ClinVar/OMIM	marshall syndrome	0	C0265235
fibrochondrogenesis	COL11A1	p.lys1636glu	NA	ClinVar/OMIM	fibrochondrogenesis	0	C0265282
stickler syndrome, dominant	COL11A1	p.asn1602ser	NA	ClinVar/OMIM	stickler syndrome, dominant	0	C2020284;C0265253
fibrochondrogenesis	COL11A1	p.met1576ile	NA	ClinVar/OMIM	fibrochondrogenesis	0	C0265282
stickler syndrome, dominant	COL11A1	p.ile1543leu	NA	ClinVar/OMIM	stickler syndrome, dominant	0	C2020284;C0265253
stickler syndrome, dominant	COL11A1	p.pro1532ala	NA	ClinVar/OMIM	stickler syndrome, dominant	0	C2020284;C0265253
marshall syndrome	COL11A1	p.pro1263leu	NA	ClinVar/OMIM	marshall syndrome	0	C0265235
fibrochondrogenesis	COL11A1	p.pro1077thr	NA	ClinVar/OMIM	fibrochondrogenesis	0	C0265282
marshall syndrome	COL11A1	p.pro674ser	NA	ClinVar/OMIM	marshall syndrome	0	C0265235
fibrochondrogenesis	COL11A1	p.pro650arg	NA	ClinVar/OMIM	fibrochondrogenesis	0	C0265282
stickler syndrome, dominant	COL11A1	p.val440=	NA	ClinVar/OMIM	stickler syndrome, dominant	0	C2020284;C0265253
stickler syndrome, dominant	COL11A1	p.thr394ala	NA	ClinVar/OMIM	stickler syndrome, dominant	0	C2020284;C0265253
fibrochondrogenesis	COL11A1	p.ile337=	NA	ClinVar/OMIM	fibrochondrogenesis	0	C0265282
marshall syndrome	COL11A1	p.tyr309phe	NA	ClinVar/OMIM	marshall syndrome	0	C0265235
marshall syndrome	COL11A1	p.glu282gly	NA	ClinVar/OMIM	marshall syndrome	0	C0265235
stickler syndrome, dominant	COL11A1	p.ala276=	NA	ClinVar/OMIM	stickler syndrome, dominant	0	C2020284;C0265253
stickler syndrome, dominant	COL11A1	p.arg12pro	NA	ClinVar/OMIM	stickler syndrome, dominant	0	C2020284;C0265253
masp2 deficiency	MASP2	p.asp530=	NA	ClinVar/OMIM	masp2 deficiency	0	C3151085
masp2 deficiency	MASP2	p.ala360=	NA	ClinVar/OMIM	masp2 deficiency	0	C3151085
masp2 deficiency	MASP2	p.ser323arg	NA	ClinVar/OMIM	masp2 deficiency	0	C3151085
masp2 deficiency	MASP2	p.lys270gln	NA	ClinVar/OMIM	masp2 deficiency	0	C3151085
masp2 deficiency	MASP2	p.phe221leu	NA	ClinVar/OMIM	masp2 deficiency	0	C3151085
masp2 deficiency	MASP2	p.pro204=	NA	ClinVar/OMIM	masp2 deficiency	0	C3151085
masp2 deficiency	MASP2	p.ala169=	NA	ClinVar/OMIM	masp2 deficiency	0	C3151085
masp2 deficiency	MASP2	p.asp140=	NA	ClinVar/OMIM	masp2 deficiency	0	C3151085
masp2 deficiency	MASP2	p.thr128=	NA	ClinVar/OMIM	masp2 deficiency	0	C3151085
masp2 deficiency	MASP2	p.pro53=	NA	ClinVar/OMIM	masp2 deficiency	0	C3151085
masp2 deficiency	MASP2	p.ala31=	NA	ClinVar/OMIM	masp2 deficiency	0	C3151085
masp2 deficiency	MASP2	p.phe27=	NA	ClinVar/OMIM	masp2 deficiency	0	C3151085
hereditary sensory and autonomic neuropathy, type v	NGF	p.cys229=	NA	ClinVar/OMIM	hereditary sensory and autonomic neuropathy, type v	0	C0020075
hereditary sensory and autonomic neuropathy, type v	NGF	p.val159=	NA	ClinVar/OMIM	hereditary sensory and autonomic neuropathy, type v	0	C0020075
hereditary sensory and autonomic neuropathy, type v	NGF	p.val141leu	NA	ClinVar/OMIM	hereditary sensory and autonomic neuropathy, type v	0	C0020075
ehlers-danlos syndrome, kyphoscoliotic form	PLOD1	p.val30ala	NA	ClinVar/OMIM	ehlers-danlos syndrome, kyphoscoliotic form	0	C0013720	A
ehlers-danlos syndrome, kyphoscoliotic form	PLOD1	p.arg79trp	NA	ClinVar/OMIM	ehlers-danlos syndrome, kyphoscoliotic form	0	C0013720	A
ehlers-danlos syndrome, kyphoscoliotic form	PLOD1	p.gly159ser	NA	ClinVar/OMIM	ehlers-danlos syndrome, kyphoscoliotic form	0	C0013720	A
ehlers-danlos syndrome, kyphoscoliotic form	PLOD1	p.ile186val	NA	ClinVar/OMIM	ehlers-danlos syndrome, kyphoscoliotic form	0	C0013720	A
ehlers-danlos syndrome, kyphoscoliotic form	PLOD1	p.arg193=	NA	ClinVar/OMIM	ehlers-danlos syndrome, kyphoscoliotic form	0	C0013720	A
ehlers-danlos syndrome, kyphoscoliotic form	PLOD1	p.arg442his	NA	ClinVar/OMIM	ehlers-danlos syndrome, kyphoscoliotic form	0	C0013720	A
ehlers-danlos syndrome, kyphoscoliotic form	PLOD1	p.arg463gln	NA	ClinVar/OMIM	ehlers-danlos syndrome, kyphoscoliotic form	0	C0013720	A
ehlers-danlos syndrome, kyphoscoliotic form	PLOD1	p.thr562=	NA	ClinVar/OMIM	ehlers-danlos syndrome, kyphoscoliotic form	0	C0013720	A
ehlers-danlos syndrome, hydroxylysine-deficient	PLOD1	p.pro597leu	NA	ClinVar/OMIM	ehlers-danlos syndrome, hydroxylysine-deficient	0	C0268342	A
ehlers-danlos syndrome, kyphoscoliotic form	PLOD1	p.arg644cys	NA	ClinVar/OMIM	ehlers-danlos syndrome, kyphoscoliotic form	0	C0013720	A
ehlers-danlos syndrome, kyphoscoliotic form	PLOD1	p.arg690gln	NA	ClinVar/OMIM	ehlers-danlos syndrome, kyphoscoliotic form	0	C0013720	A
ehlers-danlos syndrome, kyphoscoliotic form	PLOD1	p.ile720=	NA	ClinVar/OMIM	ehlers-danlos syndrome, kyphoscoliotic form	0	C0013720	A
pycnodysostosis	CTSK	p.asn184ser	NA	ClinVar/OMIM	pycnodysostosis	0	C0238402
pycnodysostosis	CTSK	p.pro164thr	NA	ClinVar/OMIM	pycnodysostosis	0	C0238402
pycnodysostosis	CTSK	p.ile57val	NA	ClinVar/OMIM	pycnodysostosis	0	C0238402
retinitis pigmentosa, recessive	SEMA4A	p.thr30=	NA	ClinVar/OMIM	retinitis pigmentosa, recessive	0	C0035334
retinitis pigmentosa, recessive	SEMA4A	p.gly32val	NA	ClinVar/OMIM	retinitis pigmentosa, recessive	0	C0035334
cone-rod dystrophy, recessive	SEMA4A	p.asn135=	NA	ClinVar/OMIM	cone-rod dystrophy, recessive	0	C0206428;C0393983;C1704638;C0330095
cone-rod dystrophy, recessive	SEMA4A	p.ser165leu	NA	ClinVar/OMIM	cone-rod dystrophy, recessive	0	C0206428;C0393983;C1704638;C0330095
cone-rod dystrophy, recessive	SEMA4A	p.thr365ile	NA	ClinVar/OMIM	cone-rod dystrophy, recessive	0	C0206428;C0393983;C1704638;C0330095
retinitis pigmentosa, recessive	SEMA4A	p.ala446val	NA	ClinVar/OMIM	retinitis pigmentosa, recessive	0	C0035334
retinitis pigmentosa, recessive	SEMA4A	p.leu702=	NA	ClinVar/OMIM	retinitis pigmentosa, recessive	0	C0035334
retinitis pigmentosa, recessive	SEMA4A	p.arg723ser	NA	ClinVar/OMIM	retinitis pigmentosa, recessive	0	C0035334
cone-rod dystrophy, recessive	SEMA4A	p.ala751thr	NA	ClinVar/OMIM	cone-rod dystrophy, recessive	0	C0206428;C0393983;C1704638;C0330095
autoimmune lymphoproliferative syndrome	FASLG	p.trp14cys	NA	ClinVar/OMIM	autoimmune lymphoproliferative syndrome	0	C2750732;C2674723;C0349639;C1328840
autoimmune lymphoproliferative syndrome	FASLG	p.pro61_pro62del	NA	ClinVar/OMIM	autoimmune lymphoproliferative syndrome	0	C2750732;C2674723;C0349639;C1328840
autoimmune lymphoproliferative syndrome	FASLG	p.pro59leu	NA	ClinVar/OMIM	autoimmune lymphoproliferative syndrome	0	C2750732;C2674723;C0349639;C1328840
autoimmune lymphoproliferative syndrome	FASLG	p.ala93val	NA	ClinVar/OMIM	autoimmune lymphoproliferative syndrome	0	C2750732;C2674723;C0349639;C1328840
autoimmune lymphoproliferative syndrome	FASLG	p.asn250ile	NA	ClinVar/OMIM	autoimmune lymphoproliferative syndrome	0	C2750732;C2674723;C0349639;C1328840
antithrombin-iii deficiency	SERPINC1	p.gln366glu	NA	ClinVar/OMIM	antithrombin-iii deficiency	0	C0272375
antithrombin-iii deficiency	SERPINC1	p.met352val	NA	ClinVar/OMIM	antithrombin-iii deficiency	0	C0272375
macular degeneration	HMCN1	p.arg261his	NA	ClinVar/OMIM	macular degeneration	0	C1863534;C0339512;C2675210;C0024437	C
macular degeneration	HMCN1	p.ala294thr	NA	ClinVar/OMIM	macular degeneration	0	C1863534;C0339512;C2675210;C0024437	C
macular degeneration	HMCN1	p.pro446=	NA	ClinVar/OMIM	macular degeneration	0	C1863534;C0339512;C2675210;C0024437	C
macular degeneration	HMCN1	p.thr469lys	NA	ClinVar/OMIM	macular degeneration	0	C1863534;C0339512;C2675210;C0024437	C
macular degeneration	HMCN1	p.thr530ile	NA	ClinVar/OMIM	macular degeneration	0	C1863534;C0339512;C2675210;C0024437	C
macular degeneration	HMCN1	p.ile652=	NA	ClinVar/OMIM	macular degeneration	0	C1863534;C0339512;C2675210;C0024437	C
macular degeneration	HMCN1	p.tyr658cys	NA	ClinVar/OMIM	macular degeneration	0	C1863534;C0339512;C2675210;C0024437	C
macular degeneration	HMCN1	p.leu696val	NA	ClinVar/OMIM	macular degeneration	0	C1863534;C0339512;C2675210;C0024437	C
macular degeneration	HMCN1	p.ser709asn	NA	ClinVar/OMIM	macular degeneration	0	C1863534;C0339512;C2675210;C0024437	C
macular degeneration	HMCN1	p.leu787val	NA	ClinVar/OMIM	macular degeneration	0	C1863534;C0339512;C2675210;C0024437	C
macular degeneration	HMCN1	p.leu812phe	NA	ClinVar/OMIM	macular degeneration	0	C1863534;C0339512;C2675210;C0024437	C
macular degeneration	HMCN1	p.asn917his	NA	ClinVar/OMIM	macular degeneration	0	C1863534;C0339512;C2675210;C0024437	C
macular degeneration	HMCN1	p.ala1093glu	NA	ClinVar/OMIM	macular degeneration	0	C1863534;C0339512;C2675210;C0024437	C
macular degeneration	HMCN1	p.arg1141his	NA	ClinVar/OMIM	macular degeneration	0	C1863534;C0339512;C2675210;C0024437	C
macular degeneration	HMCN1	p.thr1142=	NA	ClinVar/OMIM	macular degeneration	0	C1863534;C0339512;C2675210;C0024437	C
macular degeneration	HMCN1	p.arg1175his	NA	ClinVar/OMIM	macular degeneration	0	C1863534;C0339512;C2675210;C0024437	C
macular degeneration	HMCN1	p.ile1228=	NA	ClinVar/OMIM	macular degeneration	0	C1863534;C0339512;C2675210;C0024437	C
macular degeneration	HMCN1	p.glu1343=	NA	ClinVar/OMIM	macular degeneration	0	C1863534;C0339512;C2675210;C0024437	C
macular degeneration	HMCN1	p.pro1451leu	NA	ClinVar/OMIM	macular degeneration	0	C1863534;C0339512;C2675210;C0024437	C
macular degeneration	HMCN1	p.asn1461ser	NA	ClinVar/OMIM	macular degeneration	0	C1863534;C0339512;C2675210;C0024437	C
macular degeneration	HMCN1	p.glu1462val	NA	ClinVar/OMIM	macular degeneration	0	C1863534;C0339512;C2675210;C0024437	C
macular degeneration	HMCN1	p.thr1480=	NA	ClinVar/OMIM	macular degeneration	0	C1863534;C0339512;C2675210;C0024437	C
macular degeneration	HMCN1	p.phe1482=	NA	ClinVar/OMIM	macular degeneration	0	C1863534;C0339512;C2675210;C0024437	C
macular degeneration	HMCN1	p.asn1902=	NA	ClinVar/OMIM	macular degeneration	0	C1863534;C0339512;C2675210;C0024437	C
macular degeneration	HMCN1	p.val2025=	NA	ClinVar/OMIM	macular degeneration	0	C1863534;C0339512;C2675210;C0024437	C
macular degeneration	HMCN1	p.arg2171cys	NA	ClinVar/OMIM	macular degeneration	0	C1863534;C0339512;C2675210;C0024437	C
macular degeneration	HMCN1	p.pro2332=	NA	ClinVar/OMIM	macular degeneration	0	C1863534;C0339512;C2675210;C0024437	C
macular degeneration	HMCN1	p.leu2350met	NA	ClinVar/OMIM	macular degeneration	0	C1863534;C0339512;C2675210;C0024437	C
macular degeneration	HMCN1	p.leu2436pro	NA	ClinVar/OMIM	macular degeneration	0	C1863534;C0339512;C2675210;C0024437	C
macular degeneration	HMCN1	p.gly2678ala	NA	ClinVar/OMIM	macular degeneration	0	C1863534;C0339512;C2675210;C0024437	C
macular degeneration	HMCN1	p.gly2830glu	NA	ClinVar/OMIM	macular degeneration	0	C1863534;C0339512;C2675210;C0024437	C
macular degeneration	HMCN1	p.val2977met	NA	ClinVar/OMIM	macular degeneration	0	C1863534;C0339512;C2675210;C0024437	C
macular degeneration	HMCN1	p.thr3019=	NA	ClinVar/OMIM	macular degeneration	0	C1863534;C0339512;C2675210;C0024437	C
macular degeneration	HMCN1	p.val3027=	NA	ClinVar/OMIM	macular degeneration	0	C1863534;C0339512;C2675210;C0024437	C
macular degeneration	HMCN1	p.his3061arg	NA	ClinVar/OMIM	macular degeneration	0	C1863534;C0339512;C2675210;C0024437	C
macular degeneration	HMCN1	p.ala3136thr	NA	ClinVar/OMIM	macular degeneration	0	C1863534;C0339512;C2675210;C0024437	C
macular degeneration	HMCN1	p.asp3174glu	NA	ClinVar/OMIM	macular degeneration	0	C1863534;C0339512;C2675210;C0024437	C
macular degeneration	HMCN1	p.ser3219arg	NA	ClinVar/OMIM	macular degeneration	0	C1863534;C0339512;C2675210;C0024437	C
macular degeneration	HMCN1	p.met3229val	NA	ClinVar/OMIM	macular degeneration	0	C1863534;C0339512;C2675210;C0024437	C
macular degeneration	HMCN1	p.arg3390gln	NA	ClinVar/OMIM	macular degeneration	0	C1863534;C0339512;C2675210;C0024437	C
macular degeneration	HMCN1	p.val3648leu	NA	ClinVar/OMIM	macular degeneration	0	C1863534;C0339512;C2675210;C0024437	C
macular degeneration	HMCN1	p.arg3661pro	NA	ClinVar/OMIM	macular degeneration	0	C1863534;C0339512;C2675210;C0024437	C
macular degeneration	HMCN1	p.val3731ile	NA	ClinVar/OMIM	macular degeneration	0	C1863534;C0339512;C2675210;C0024437	C
macular degeneration	HMCN1	p.arg3747thr	NA	ClinVar/OMIM	macular degeneration	0	C1863534;C0339512;C2675210;C0024437	C
macular degeneration	HMCN1	p.pro3808leu	NA	ClinVar/OMIM	macular degeneration	0	C1863534;C0339512;C2675210;C0024437	C
macular degeneration	HMCN1	p.pro3896leu	NA	ClinVar/OMIM	macular degeneration	0	C1863534;C0339512;C2675210;C0024437	C
macular degeneration	HMCN1	p.ala3969thr	NA	ClinVar/OMIM	macular degeneration	0	C1863534;C0339512;C2675210;C0024437	C
macular degeneration	HMCN1	p.ala3972val	NA	ClinVar/OMIM	macular degeneration	0	C1863534;C0339512;C2675210;C0024437	C
macular degeneration	HMCN1	p.his3985tyr	NA	ClinVar/OMIM	macular degeneration	0	C1863534;C0339512;C2675210;C0024437	C
macular degeneration	HMCN1	p.leu4001=	NA	ClinVar/OMIM	macular degeneration	0	C1863534;C0339512;C2675210;C0024437	C
macular degeneration	HMCN1	p.pro4015ser	NA	ClinVar/OMIM	macular degeneration	0	C1863534;C0339512;C2675210;C0024437	C
macular degeneration	HMCN1	p.ala4053=	NA	ClinVar/OMIM	macular degeneration	0	C1863534;C0339512;C2675210;C0024437	C
macular degeneration	HMCN1	p.thr4055=	NA	ClinVar/OMIM	macular degeneration	0	C1863534;C0339512;C2675210;C0024437	C
macular degeneration	HMCN1	p.pro4063=	NA	ClinVar/OMIM	macular degeneration	0	C1863534;C0339512;C2675210;C0024437	C
macular degeneration	HMCN1	p.ile4119val	NA	ClinVar/OMIM	macular degeneration	0	C1863534;C0339512;C2675210;C0024437	C
macular degeneration	HMCN1	p.gly4155ala	NA	ClinVar/OMIM	macular degeneration	0	C1863534;C0339512;C2675210;C0024437	C
macular degeneration	HMCN1	p.thr4284ala	NA	ClinVar/OMIM	macular degeneration	0	C1863534;C0339512;C2675210;C0024437	C
macular degeneration	HMCN1	p.thr4292=	NA	ClinVar/OMIM	macular degeneration	0	C1863534;C0339512;C2675210;C0024437	C
macular degeneration	HMCN1	p.ala4302=	NA	ClinVar/OMIM	macular degeneration	0	C1863534;C0339512;C2675210;C0024437	C
macular degeneration	HMCN1	p.glu4321asp	NA	ClinVar/OMIM	macular degeneration	0	C1863534;C0339512;C2675210;C0024437	C
macular degeneration	HMCN1	p.thr4329ile	NA	ClinVar/OMIM	macular degeneration	0	C1863534;C0339512;C2675210;C0024437	C
macular degeneration	HMCN1	p.ser4481thr	NA	ClinVar/OMIM	macular degeneration	0	C1863534;C0339512;C2675210;C0024437	C
macular degeneration	HMCN1	p.ser4481tyr	NA	ClinVar/OMIM	macular degeneration	0	C1863534;C0339512;C2675210;C0024437	C
macular degeneration	HMCN1	p.ala4648ser	NA	ClinVar/OMIM	macular degeneration	0	C1863534;C0339512;C2675210;C0024437	C
macular degeneration	HMCN1	p.arg4771trp	NA	ClinVar/OMIM	macular degeneration	0	C1863534;C0339512;C2675210;C0024437	C
macular degeneration	HMCN1	p.pro4854=	NA	ClinVar/OMIM	macular degeneration	0	C1863534;C0339512;C2675210;C0024437	C
macular degeneration	HMCN1	p.ile4883met	NA	ClinVar/OMIM	macular degeneration	0	C1863534;C0339512;C2675210;C0024437	C
macular degeneration	HMCN1	p.arg4909his	NA	ClinVar/OMIM	macular degeneration	0	C1863534;C0339512;C2675210;C0024437	C
macular degeneration	HMCN1	p.arg4976gln	NA	ClinVar/OMIM	macular degeneration	0	C1863534;C0339512;C2675210;C0024437	C
macular degeneration	HMCN1	p.gly5095arg	NA	ClinVar/OMIM	macular degeneration	0	C1863534;C0339512;C2675210;C0024437	C
macular degeneration	HMCN1	p.ser5118thr	NA	ClinVar/OMIM	macular degeneration	0	C1863534;C0339512;C2675210;C0024437	C
macular degeneration	HMCN1	p.asp5141asn	NA	ClinVar/OMIM	macular degeneration	0	C1863534;C0339512;C2675210;C0024437	C
macular degeneration	HMCN1	p.gly5154ser	NA	ClinVar/OMIM	macular degeneration	0	C1863534;C0339512;C2675210;C0024437	C
macular degeneration	HMCN1	p.thr5184ser	NA	ClinVar/OMIM	macular degeneration	0	C1863534;C0339512;C2675210;C0024437	C
macular degeneration	HMCN1	p.asp5278=	NA	ClinVar/OMIM	macular degeneration	0	C1863534;C0339512;C2675210;C0024437	C
macular degeneration	HMCN1	p.gln5345del	NA	ClinVar/OMIM	macular degeneration	0	C1863534;C0339512;C2675210;C0024437	C
macular degeneration	HMCN1	p.leu5525=	NA	ClinVar/OMIM	macular degeneration	0	C1863534;C0339512;C2675210;C0024437	C
macular degeneration	HMCN1	p.phe5543leu	NA	ClinVar/OMIM	macular degeneration	0	C1863534;C0339512;C2675210;C0024437	C
macular degeneration	HMCN1	p.gln5576=	NA	ClinVar/OMIM	macular degeneration	0	C1863534;C0339512;C2675210;C0024437	C
macular degeneration	HMCN1	p.glu5585ala	NA	ClinVar/OMIM	macular degeneration	0	C1863534;C0339512;C2675210;C0024437	C
macular degeneration	HMCN1	p.val5591=	NA	ClinVar/OMIM	macular degeneration	0	C1863534;C0339512;C2675210;C0024437	C
macular degeneration	HMCN1	p.arg5604leu	NA	ClinVar/OMIM	macular degeneration	0	C1863534;C0339512;C2675210;C0024437	C
factor xiii subunit b deficiency	F13B	p.his605=	NA	ClinVar/OMIM	factor xiii subunit b deficiency	0	C2750481
factor xiii subunit b deficiency	F13B	p.his557arg	NA	ClinVar/OMIM	factor xiii subunit b deficiency	0	C2750481
factor xiii subunit b deficiency	F13B	p.glu440=	NA	ClinVar/OMIM	factor xiii subunit b deficiency	0	C2750481
factor xiii subunit b deficiency	F13B	p.ser366=	NA	ClinVar/OMIM	factor xiii subunit b deficiency	0	C2750481
factor xiii subunit b deficiency	F13B	p.arg293cys	NA	ClinVar/OMIM	factor xiii subunit b deficiency	0	C2750481
dyssegmental dysplasia	HSPG2	p.arg2004cys	NA	ClinVar/OMIM	dyssegmental dysplasia	0	C1857100
schwartz-jampel syndrome	HSPG2	p.val872phe	NA	ClinVar/OMIM	schwartz-jampel syndrome	0	C0036391
heterotaxy syndrome	LEFTY2	p.pro124arg	NA	ClinVar/OMIM	heterotaxy syndrome	0	C3178805
renal tubular dysgenesis	AGT	p.pro449ala	NA	ClinVar/OMIM	renal tubular dysgenesis	0	C0266313
renal tubular dysgenesis	AGT	p.glu408lys	NA	ClinVar/OMIM	renal tubular dysgenesis	0	C0266313
renal tubular dysgenesis	AGT	p.gly317=	NA	ClinVar/OMIM	renal tubular dysgenesis	0	C0266313
renal tubular dysgenesis	AGT	p.pro297=	NA	ClinVar/OMIM	renal tubular dysgenesis	0	C0266313
renal tubular dysgenesis	AGT	p.ala295ser	NA	ClinVar/OMIM	renal tubular dysgenesis	0	C0266313
renal tubular dysgenesis	AGT	p.gln225pro	NA	ClinVar/OMIM	renal tubular dysgenesis	0	C0266313
renal tubular dysgenesis	AGT	p.ala138ser	NA	ClinVar/OMIM	renal tubular dysgenesis	0	C0266313
renal tubular dysgenesis	AGT	p.leu109=	NA	ClinVar/OMIM	renal tubular dysgenesis	0	C0266313
renal tubular dysgenesis	AGT	p.ala92thr	NA	ClinVar/OMIM	renal tubular dysgenesis	0	C0266313
renal tubular dysgenesis	AGT	p.leu88pro	NA	ClinVar/OMIM	renal tubular dysgenesis	0	C0266313
stickler syndrome, recessive	COL9A2	p.leu537=	NA	ClinVar/OMIM	stickler syndrome, recessive	0	C2020284;C0265253
multiple epiphyseal dysplasia, dominant	COL9A2	p.arg512lys	NA	ClinVar/OMIM	multiple epiphyseal dysplasia, dominant	0	C0026760
stickler syndrome, recessive	COL9A2	p.pro302leu	NA	ClinVar/OMIM	stickler syndrome, recessive	0	C2020284;C0265253
multiple epiphyseal dysplasia, dominant	COL9A2	p.pro124ala	NA	ClinVar/OMIM	multiple epiphyseal dysplasia, dominant	0	C0026760
stickler syndrome, recessive	COL9A2	p.asp77ala	NA	ClinVar/OMIM	stickler syndrome, recessive	0	C2020284;C0265253
macular degeneration	HTRA1	p.leu12_leu13insser	NA	ClinVar/OMIM	macular degeneration	0	C1863534;C0339512;C2675210;C0024437	C
macular degeneration	HTRA1	p.ala281=	NA	ClinVar/OMIM	macular degeneration	0	C1863534;C0339512;C2675210;C0024437	C
macular degeneration	HTRA1	p.asp420glu	NA	ClinVar/OMIM	macular degeneration	0	C1863534;C0339512;C2675210;C0024437	C
mannose-binding lectin deficiency	MBL2	p.ser161=	NA	ClinVar/OMIM	mannose-binding lectin deficiency	0	C3280586
mannose-binding lectin deficiency	MBL2	p.lys56glu	NA	ClinVar/OMIM	mannose-binding lectin deficiency	0	C3280586
mannose-binding lectin deficiency	MBL2	p.thr55ala	NA	ClinVar/OMIM	mannose-binding lectin deficiency	0	C3280586
[truncated: 31,055 more rows]

## Sheet: total_gene_counts
	disease_term	total_genes	MAT_genes	CUIs
0	Menorrhagia	2	2	C0025323
1	Achondrogenesis 2	1	1	C0220685
2	Collagen VI-related myopathy	2	2	0
3	Juvenile open angle glaucoma	1	1	C2012152
4	Pulmonary Surfactant Metabolism Dysfunction, Dominant	1	1	C3711368
5	Abnormality of the musculature	6	1	C4021745
6	Stargardt disease	12	1	C1855465;C0271093
7	Tetralogy of Fallot	6	1	C0039685;C0018798
8	Muscular dystrophy, Duchenne, modifier of	1	1	C0013264
9	FIBRINOGEN KEOKUK	1	1	C0553681;C4016073
10	Arthroophthalmopathy	1	1	0
11	EHLERS-DANLOS SYNDROME, CARDIAC VALVULAR TYPE	1	1	C4303789
12	Plaque calcification, increased risk, association with	1	1	0
13	Poretti Boltshauser syndrome	1	1	C4014821
14	Congenital myasthenic syndrome with vocal cord paralysis	2	1	0
15	Selective tooth agenesis, nonsyndromic	2	1	C4082304
16	Craniosynostosis, isolated metopic	1	1	C3280974
17	Deafness	87	12	C1832978;C0011053
18	Breast cancer, increased risk, in African American women, association with	1	1	C0678222;C0006142
19	Small vessel disease	1	1	C1843512;C3810309
20	Obesity, early onset	12	1	C1833056
21	Intraventricular haemorrhage	1	1	C0240059
22	Spondyloepiphyseal dysplasia congenital type	1	1	C0542428;C2745959
23	FIBRINOGEN NIJMEGEN	1	1	C3888186;C1260903;C4016074
24	Progressive neurodegenerative disease	1	1	0
25	AllHighlyPenetrant	261	5	0
26	Elevated waist-to-hip ratio, association with	21	3	0
27	Isolated skeletal features	1	1	0
28	NEUTROPENIA, SEVERE CONGENITAL, 1, AUTOSOMAL DOMINANT	1	1	C1859966
29	ICHTHYOSIS, CONGENITAL, AUTOSOMAL RECESSIVE 11	1	1	C0079583;C0079154;C0020758
30	Pulmonary fibrosis, idiopathic	10	3	C1800706;C3553617
31	Crohns Disease, association with	8	1	C0010346
32	MYOPATHY, AREFLEXIA, RESPIRATORY DISTRESS, AND DYSPHAGIA, EARLY-ONSET	1	1	C3280679
33	Eosinophilic esophagitis	16	1	C0341106
34	Factor XIII Subunit B Deficiency	1	1	C2750481
35	Al-Awadi-Raas-Rothschild syndrome with dental anomalies	1	1	C0002736;C0202311;C0268381;C0001909;C0003372;C0001895;C0002367
36	Hydrops fetalis, nonimmune	19	1	C0455988
37	EPIDERMOLYSIS BULLOSA DYSTROPHICA, AUTOSOMAL DOMINANT	1	1	C0432322;C0079294
38	Intracranial calcification	2	1	C0270685
39	Afibrinogenaemia / hypofibrinogenaemia	2	2	C0001733
40	Developmental language disorder	1	1	C0023014
41	Glomerulopathy with fibronectin deposits	1	1	C3888104;C1866075
42	ANTERIOR SEGMENT DYSGENESIS 8	1	1	C4310622
43	Right atrial isomerism	1	1	C3178806
44	Microform cleft	1	1	C2677434
45	Ehlers-Danlos-like syndrome	1	1	C0013720
46	SORSBY FUNDUS DYSTROPHY	1	1	C1850938
47	ECTOPIA LENTIS 2, ISOLATED, AUTOSOMAL RECESSIVE	1	1	C3541474
48	Thyroid cancer, non-medullary, 5	1	1	C4225292
49	Cone-rod dystrophy 10	1	1	C1846529
50	Hereditary angioedema	1	1	C1862892;C0002994;C0019243
51	Spondyloepiphyseal dysplasia, atypical	1	1	C0038015;C2745959
52	Geleophysic dysplasia 1	1	1	C3278147
53	Metaphyseal dysplasia, Spahr type	1	1	C0432225
54	Thyroid dyshormonogenesis	7	1	C0342191
55	Plasminogen activator inhibitor type 1 deficiency	1	1	C2750067
56	Intellectual disability/Myopathy/Muscular dystrophy	2	1	C3714756
57	Stiff skin syndrome	1	1	C1861456
58	Retinopathy of prematurity	5	1	C0035344
59	Reticulate acropigmentation of Kitamura	1	1	C0406811
60	Solitary median maxillary central incisor	1	1	C1840235
61	Reduced vWF plasma protein levels	1	1	0
62	Pycnodysostosis	1	1	C0238402
63	COL4A1-Related Disorders	1	1	C1413582
64	ROBINOW SYNDROME, AUTOSOMAL DOMINANT 1	1	1	C0265205
65	Ehlers-Danlos syndrome, vascular type	1	1	C0268338
66	Prominent superficial blood vessels	1	1	C1848771
67	Du Pan syndrome	1	1	C1856738
68	Epidermolysis bullosa, junctional	8	4	C0268374;C0079683;C0079301
69	POLYMICROGYRIA WITHOUT VASCULAR-TYPE EHLERS-DANLOS SYNDROME	1	1	C5193160
70	Encephalopathy, familial, with neuroserpin inclusion bodies	1	1	C1858680
71	Manitoba-oculo-tricho-anal syndrome	1	1	C1855425
72	Conotruncal heart defects	68	6	C1853238
73	Factor X deficiency	1	1	C0015519
74	Acute aortic dissections	3	2	C0241868
75	COL11A1-Related Disorders	1	1	C1413570
76	RETINITIS PIGMENTOSA 25	1	1	C1864446;C0035334
77	Collagen VI deficiency	3	3	0
78	Reduced enzyme activity, association with	1	1	0
79	EPIDERMOLYSIS BULLOSA, JUNCTIONAL, HERLITZ TYPE	3	3	C0079683
80	EXFOLIATION SYNDROME, SUSCEPTIBILITY TO	1	1	C4016255
81	Spondyloepimetaphyseal dysplasia, Strudwick	1	1	C0700635
82	Cerebral autosomal recessive arteriopathy with subcortical infarcts and leukoencephalopathy	1	1	C1838577;C0270612
83	CORNEAL DYSTROPHY, EPITHELIAL BASEMENT MEMBRANE	1	1	C0521723
84	Nephronophthisis	22	2	C3151188;C0687120
85	Common variable immunodeficiency	3	2	C0009447;C2936664
86	Palmoplantar keratosis, Nagashima-type	1	1	C4551675;C0022596
87	Lung cancer	3	1	C0242379
88	FIBRINOGEN KYOTO 2	1	1	C4016066
89	Atrioventricular septal defect, Down-syndrome-associated	9	7	C1389018
90	Osteoarthritis of the hand	1	1	C0263746
91	Ichthyosis, congenital, autosomal recessive	8	1	C1274215;C0020758
92	Rolandic epilepsy with speech dyspraxia and mental retardation X-linked	1	1	C1845070
93	Neuromotor impairment, intellectual disability & neuropathy	1	1	0
94	OSTEOGENESIS IMPERFECTA, TYPE III/IV	1	1	C4015948
95	Macular degeneration, age related	20	3	C1855465;C3495438;C1858806;C0271093;C0242383
96	Spondylarthopathy with brachydactyly	1	1	C0221357
97	Loeys-Dietz Syndrome	4	1	C2697932
98	Myocardial infarction, protection, association with	1	1	C3810814;C0428953;C4552959;C0027051;C2926063
99	Von Willebrand disease 2	1	1	0
100	FIBRINOGEN ROUEN 1	1	1	C4016061
101	Cutis laxa, autosomal recessive, type IC	1	1	C0268351;C2750804
102	Metaphyseal chondrodysplasia, Schmid	1	1	C2748503;C0265289
103	Spinocerebellar ataxia, autosomal recessive, 22	1	1	C4310781
104	MARFAN SYNDROME, ATYPICAL	1	1	C0024796;C4016055
105	Hepatitis B, chronic, association with	3	1	C0524909
106	Alport syndrome & rheumatoid arthritis	1	1	C1567741
107	ACID-LABILE SUBUNIT DEFICIENCY	1	1	C3900122
108	Occlusive cerebrovascular disease	1	1	C4015791
109	Pheochromocytoma/paraganglioma-polycythemia	2	2	C4551683;C0031511
110	Knobloch syndrome	3	2	C1849409
111	Geleophysic dysplasia 2	1	1	C3280054
112	High myopia, early-onset	25	4	C0271183
113	Osteogenesis imperfecta III, modifier of	1	1	C0268362
114	COMPLEMENT COMPONENT 4, PARTIAL DEFICIENCY OF, DUE TO DYSFUNCTIONAL C1 INHIBITOR	1	1	C0009516
115	Hypochondrogenesis	1	1	C0542428;C2745959
116	Ichthyosis, exfoliative	1	1	C1838440
117	Asthma, association with	5	1	C0004096
118	Breast cancer	190	7	C2676676;C0006142
119	MEESTER-LOEYS SYNDROME	1	1	C4310811
120	Arterial stiffness, association with	1	1	C0599949
121	Keutel Syndrome	1	1	C1855607
122	PSEUDOACHONDROPLASIA	1	1	C4310949;C0410538
123	Eye disorder	2	1	C0015397
124	Mental illness, severe	36	4	C0455498;C0004936
125	EHLERS-DANLOS SYNDROME, VASCULAR TYPE	1	1	C0268338
126	SPONDYLOEPIMETAPHYSEAL DYSPLASIA, STANESCU TYPE	1	1	C0432211
127	Hyperproinsulinaemia	1	1	C0342283
128	Glomerular kidney disease	7	4	0
129	Hydrocephalus	11	1	C0020255;C4017243
130	Alport syndrome 3, autosomal dominant	1	1	C4746547
131	High myopia, late-onset	11	2	C0271183
132	C1Q DEFICIENCY	2	2	C3150902
133	FIBRINOGEN ASAHI	1	1	C4016088
134	Asthma	2	1	C0010674;C0004096
135	Epilepsy, lateral temporal lobe, autosomal dominant	1	1	C1838062
136	PREMATURE OVARIAN FAILURE 4	1	1	C1845295
137	GDF11-associated multiple congenital anomalies and ID	1	1	C1453137;C1415032;C4521418
138	Rokitansky Kuster Hauser syndrome	1	1	C1698581
139	Diamond-Blackfan anemia-like	1	1	C4693556
140	ULLRICH CONGENITAL MUSCULAR DYSTROPHY 1, AUTOSOMAL RECESSIVE	3	3	C4225637
141	Tortuosity of retinal arteries	1	1	C1867327
142	Phenotype modifier, association with	7	2	C1879286
143	Cervical artery dissection	4	2	0
144	Landau-Kleffner syndrome	19	1	C0282512
145	FIBRINOGEN KYOTO 3	1	1	C4016091
146	Lower apoB levels	1	1	0
147	EPIDERMOLYSIS BULLOSA PRURIGINOSA, AUTOSOMAL DOMINANT	1	1	C2675780;C0079294
148	Microphthalmia with corneal opacification	1	1	0
149	FIBRINOGEN HAIFA 1	1	1	C4016084
150	FBN1-Related Disorders	1	1	C0244756;C1414542
151	Weill-Marchesani Syndrome	3	3	C0265313
152	Cleft lip with or without cleft palate	14	2	C0810364
153	Reduced hepatocyte growth factor levels, association with	1	1	0
154	Renal hypoplasia	11	1	C1852759;C0008039;C0266295
155	HENNEKAM LYMPHANGIECTASIA-LYMPHEDEMA SYNDROME 1	1	1	C4012050
156	ANTERIOR SEGMENT DYSGENESIS 7	1	1	C3151617
157	DEAFNESS, AUTOSOMAL RECESSIVE 110	1	1	C0011053;C0018772
158	Ehlers-Danlos syndrome with lethal arterial events	1	1	0
159	Intellectual disability, microcephaly, cerebral atrophy, Dandy-Walker anomaly and axonal type sensoryneural polyneuropathy	1	1	C3714756
160	MACULAR DYSTROPHY, VITELLIFORM, 5	1	1	C0339510
161	Retinal vessel disease	3	1	0
162	Multiple synostoses syndrome and brachydactyly, type A1	1	1	0
163	SURFACTANT METABOLISM DYSFUNCTION, PULMONARY, 1	1	1	C1968602
164	Hypomagnesemia, isolated	1	1	C2673648
165	Deafness, autosomal recessive 53	1	1	C1864746
166	Muscular dystrophy, limb girdle	32	5	C3280443;C1832567;C0686353
167	Altered ristocetin-induced platelet aggregation	1	1	0
168	Epidermolysis bullosa pruriginosa	1	1	C0432322;C0079294;C1275114
169	Post-ictal hemiparesis	1	1	C3469826;C0687676;C1704687
170	Corneal dystrophy, Schnyder	1	1	C0271287
171	Al-Awadi-Raas-Rothschild syndrome	1	1	C1848651
172	Ichthyosis, lamellar	4	1	C0079154;C0020758
173	Retinitis Pigmentosa	46	4	C1833245;C0035334
174	Microcephaly	39	1	C0025958
175	Stickler syndrome, type 1	1	1	C2020284
176	Punctate palmoplantar keratoderma	1	1	C1274216
177	Scoliosis	8	2	C0559260;C0036439;C0700208
178	Sensorineural hearing loss	29	3	C0018784;C3554159
179	OI/EDS COMBINED SYNDROME	1	1	C1852924
180	FIBRINOGEN OSAKA 5	1	1	C0553681;C4016094
181	IMMUNODEFICIENCY 29	1	1	C4013948
182	Short stature and mild skeletal defects	1	1	0
183	Arthrogryposis	19	2	C0003886
184	Multiple fetal abnormalities	1	1	0
185	TOOTH AGENESIS, SELECTIVE, X-LINKED, 1	1	1	C1970757;C0020608
186	Sperm immotility	7	1	C0577265
187	Marfan syndrome, incomplete	2	1	C0024796
188	Surfactant protein C deficiency	1	1	C1970470;C3274519
189	FCN3 deficiency	1	1	C3151226
190	Uncombable hair syndrome	3	2	C0432347
191	Camurati-Engelmann disease	1	1	C0011989
192	Diminished ovarian reserve	1	1	C3839507
193	Schizophrenia	880	48	C0036341
194	Atrial septal defect 6	1	1	C2751315
195	Craniosynostosis	42	5	C1858160;C0010278
196	DENTAL ANOMALIES AND SHORT STATURE	1	1	C1832594
197	F2-Related Disorders	1	1	C0439453
198	PEELING SKIN SYNDROME 2	1	1	C1853354
199	Corneal dystrophy, lattice type	1	1	C0155127;C1837974
200	Intellectual disability, epilepsy and dysmorphism	1	1	C3714756
201	Factor VII deficiency	1	1	C0015503
202	History of neurodevelopmental disorder	165	2	C2711754
203	Familial porencephaly	1	1	C1867983
204	Tooth agenesis	15	7	C0020608;C4083050
205	FACTOR XIII, B SUBUNIT, DEFICIENCY OF	1	1	C2750481
206	Maturity Onset Diabetes of the Young	10	1	C0342276
207	Transposition of the great arteries with extracardiac anomalies	4	1	0
208	Alzheimer disease, late onset, protection against	1	1	C0494463
209	Spherophakia with short stature	1	1	0
210	Bilateral kidney agenesis & oligohydramnios sequence	2	1	C1609433
211	ANTICHYMOTRYPSIN ISEHARA 1	1	1	C4015791
212	Merosin-deficient congenital muscular dystrophy 1A	1	1	C1263858
213	Lacrimo-Auriculo-Dento-Digital Syndrome	1	1	C0158667;C0265269
214	Acrocapitofemoral dysplasia	1	1	C1843096
215	Epidermolysis bullosa	9	4	C2608084;C0268374;C0014527
216	Cerebral malaria, predisposition to	1	1	C0024534
217	AMELOGENESIS IMPERFECTA, HYPOMATURATION TYPE, IIA2	1	1	C0399372
218	Congenital cataract	27	1	C0009691;C0001849
219	ENCEPHALOPATHY, FAMILIAL, WITH NEUROSERPIN INCLUSION BODIES	1	1	C1858680
220	BASAL GANGLIA CALCIFICATION, IDIOPATHIC, 5	1	1	C3809645
221	Thyroxine-binding globulin deficiency, association	1	1	C1839141;C3890934
222	MARFAN SYNDROME, NEONATAL	1	1	C4016054;C0024796
223	Dilated cardiomyopathy 1JJ	1	1	C3808935
224	Ichthyosiform erythroderma, congenital, nonbullous	2	1	C0079154
225	Winchester syndrome	1	1	C0432289
226	Renal amyloidosis	3	1	C0268382
227	Myasthenic syndrome, congenital, synaptic	1	1	C0751882
228	Autoimmune Lymphoproliferative Syndrome	3	1	C2750732;C2674723;C0349639;C1328840
229	CEROID LIPOFUSCINOSIS, NEURONAL, 10	1	1	C1864669
230	Disorder of sex development	20	5	C2930619
231	FIBRINOGEN METZ 1	1	1	C4016062
232	Thrombocytopaenia, early-onset	1	1	C0040034;C0392386
233	Decreased adult height, association with	34	7	0
234	Porencephaly and schizencephaly	1	1	C0151860;C0266484
235	Pulmonary surfactant metabolism dysfunction 2	1	1	C1970470
236	Poor pregnancy outcome in IVF	1	1	0
237	OSTEOPOROSIS, EARLY-ONSET, SUSCEPTIBILITY TO	1	1	C0029456
238	Ichthyosis, congenital, autosomal recessive 1	1	1	C0020758
239	Cleft lip and palate, incomplete, association with	1	1	C0158646
240	Osteoporosis, juvenile	1	1	C0264080
241	Stickler Syndrome, Recessive	2	2	C2020284;C0265253
242	METAPHYSEAL CHONDRODYSPLASIA, SCHMID TYPE	1	1	C2748503;C0265289
243	Macular and cone/cone-rod dystrophy	14	2	0
244	Aortic aneurysm, association with	3	1	C0340629;C0003486
245	Fibular Hypoplasia and Complex Brachydactyly	1	1	C1856738
246	Symphalangism	1	1	C3714899;C1861385;C1832708;C0039075
247	Optic disc drusen	1	1	C0029128
248	UROFACIAL SYNDROME 1	1	1	C0403555
249	ELN-related disorder	1	1	C0013765
250	Aortic dissection, acute	23	8	C0340643
251	Intellectual disability and microcephaly	9	1	0
252	Thrombotic thrombocytopenic purpura	1	1	C0034155
253	Neurology, pediatric	69	2	C0279167
254	Bruising susceptibility	4	1	C0423798
255	Epileptic encephalopathy with cerebellar atrophy	2	1	0
256	Seizures	115	5	C0036572
257	Lower sST2 levels, association with	4	1	0
258	Lamellar ichthyosis	3	1	C0079154
259	Alport syndrome	6	4	C1567743;C1567741
260	Maturity-onset diabetes of the young, type 10	2	2	C3150617
261	Amelogenesis imperfecta 1G	1	1	C2931783
262	Renal tubular dysgenesis	4	1	C0266313
263	Haematuria	4	4	C0018965
264	Focal epilepsy, diplegia, microhaematuria & cataract	1	1	C0014547
265	Crisponi syndrome	3	1	C1848947;C1832409
266	WEILL-MARCHESANI SYNDROME 3	1	1	C3553785;C0265313
267	HYPOGONADOTROPIC HYPOGONADISM 6 WITHOUT ANOSMIA	1	1	C0342384;C4016669
268	Osteogenesis Imperfecta, Recessive	8	3	C2931095;C1853162
269	Synesthesia	5	2	C0233778
270	Congenital nephrotic syndrome	1	1	C3501848;C0403399
271	Osteoarthritis, susceptibility, association with	1	1	C0409957;C3887526
272	COL11A2- Related Disorder	1	1	C1413571
273	OSTEOGENESIS IMPERFECTA, TYPE I, MILD	1	1	C4015950
274	Central hypoventilation syndrome	6	1	C1275808
275	HYPOGONADOTROPIC HYPOGONADISM 20 WITH ANOSMIA	1	1	C4016856
276	GLAUCOMA 1, OPEN ANGLE, O	1	1	C0339573;C2751294
277	Thyroxine-binding globulin-slow variant	1	1	C4016583
278	Familial aortopathy	2	1	0
279	46,XY gonadal dysgenesis, partial, with minifascicular neuropathy	1	1	C2751325
280	LOEYS-DIETZ SYNDROME 5	1	1	C3810012
281	Walker-Warburg syndrome	13	1	C0265221
282	Peeling Skin Syndrome	1	1	C1849193
283	Haemorrhagic stroke	1	1	C0553692;C3281105
284	Anterior segment dysgenesis 7	1	1	C3151617
285	Cryptophthalmos	1	1	C0311249
286	abnormal coagulation profile	1	1	C0375576
287	PLASMA TRIGLYCERIDE LEVEL QUANTITATIVE TRAIT LOCUS, LOW	1	1	C4016952
288	Cerebral ischemia	1	1	C0917798;C0007785
289	Angioedema	3	2	C0002994
290	Sensorineural hearing loss, nonsyndromic	11	2	C1842137
291	Premature ovarian failure, increased risk, association with	1	1	C0025322;C0085215
292	Glomerulopathy with fibronectin deposits 2	1	1	C1866075
293	Leptin deficiency	1	1	C3554224
294	Abnormality of the mitochondrion	13	1	C4023042
295	Phenotype modifier	29	3	C2675305
296	Macular dystrophy, vitelliform	3	2	C0339510
297	Thin basement membrane nephropathy	1	1	C0403440
298	Tuberculoid leprosy, association with	1	1	C0023351
299	Laterality defect	13	2	0
300	MYOCARDIAL INFARCTION, SUSCEPTIBILITY TO	2	1	C1832662
301	Solitary median maxillary central incisor and pyriform aperture stenosis	2	1	0
302	Exfoliation glaucoma, protection against	1	1	C0206368
303	OSTEOGENESIS IMPERFECTA, TYPE IIA	1	1	C0268358
304	Sudden unexplained death	69	5	C0520806
305	Epileptic encephalopathy, early infantile	36	1	C3463992
306	Hypogonadotropic hypogonadism 6 with or without anosmia	1	1	C3552574;C0342384
307	Hypohidrotic X-linked ectodermal dysplasia	1	1	C0162359;C3539920
308	AFIBRINOGENEMIA, CONGENITAL	2	2	C2584774
309	Chondrodysplasia, Grebe type	1	1	C0265260
310	Lower plasma apo	1	1	0
311	Immunodeficiency, common variable, modifier	1	1	C0009447;C2936664
312	Hereditary factor XIII deficiency disease	1	1	C0015530
313	Nephritis	1	1	C0027697
314	Megalocornea & lens-related glaucoma	1	1	C0344530
315	Junctional epidermolysis bullosa gravis of Herlitz	3	3	C0079683
316	Von Willebrand, Normandy variant	1	1	C1264040
317	Cardiovascular malformations	25	1	C4049796
318	PANCREATITIS, HEREDITARY	1	1	C0030305;C0238339
319	JMH blood group variation	1	1	C4017123
320	Torg syndrome	1	1	C1850155
321	Cardiomyopathy, dilated	122	2	C3553409;C0007193
322	Retinal Degeneration	1	1	C1842127;C0035304
323	Doyne Honeycomb Retinal Dystrophy	1	1	C1832174
324	TELANGIECTASIA, HEREDITARY HEMORRHAGIC, TYPE 5	1	1	C0039445
325	Inguinal hernia, association with	1	1	C0019294
326	Marfan syndrome with intracranial hypertension	1	1	0
327	ADAMTS13 deficiency & Upshaw-Schulman syndrome	1	1	C0034155
328	Sudden unexpected death in infancy	12	1	0
329	CORNEAL DYSTROPHY, THIEL-BEHNKE TYPE	1	1	C1562894
330	Prostate cancer, predisposition, association with	1	1	C0600139;C0376358
331	Spermatogenic failure	5	2	C3151406;C3553794
332	Metacarpal 4-5 fusion	1	1	C1839728
333	Cutis laxa	7	2	C0010495;C0268351
334	FIBRINOGEN PONTOISE 2	1	1	C4016075
335	Epidermolysis bullosa, pretibial	1	1	C0432321;C0014527
336	OOCYTE MATURATION DEFECT 6	1	1	C5193047
337	Isolated unilateral hemispheric cerebellar hypoplasia	2	1	C4707885
338	Hyperinsulinism	23	2	C0020459;C1864903
339	Anterior segment dysgenesis 7	1	1	C3151617
340	Connective tissue weakness	1	1	0
341	EPILEPTIC ENCEPHALOPATHY, EARLY INFANTILE, 47	1	1	C4552072
342	Marfan Syndrome	2	1	C3541518;C0024796
343	FACTOR V AND FACTOR VIII, COMBINED DEFICIENCY OF, 1, MIDDLE EASTERN JEWISH TYPE	1	1	C1856883
344	Triglyceride levels, association with	14	1	C0428475;C0202236
345	Pancreatitis, acute recurrent	1	1	C0267937
346	Inflammatory bowel disease, early/very early-onset	4	1	C0021390
347	Osteogenesis imperfecta 2	2	2	C0268358
348	Lupus with neurological manifestations & multiple infections	1	1	0
349	Achondrogenesis II-hypochondrogen./Mult. epiphyseal dysplasia, myopia & deafness/Kniest dysplasia/Legg-Calve-Perthes disease	1	1	0
350	Epidermolysis bullosa, pretibial dystrophic	1	1	C0432321
351	Stickler syndrome, type I, nonsyndromic ocular	1	1	C1836080;C0265253
352	Reduced cortisol binding capacity	1	1	0
353	CHARGE association	2	1	C0265354
354	Multiple synostoses syndrome 2	1	1	C1832708
355	FIBRINOGEN BALTIMORE 1	1	1	C1260903;C4016085
356	Multiple epiphyseal dysplasia 3	1	1	C3152083;C1832998
357	Hypomagnesemia 4	1	1	C2673648
358	Lower plasma triglyceride level	3	3	C1857970;C4014555
359	OSTEOGENESIS IMPERFECTA, TYPE II, THIN-BONE TYPE	1	1	C4015952
360	EHLERS-DANLOS SYNDROME, CLASSIC TYPE, 1	1	1	C4225429
361	DZ twinning	1	1	0
362	Cornea plana 2, autosomal recessive	1	1	C1857574
363	Tumoral calcinosis, hyperphosphatemic, familial, 2	1	1	C4693863
364	Truncus arteriosus	2	1	C0041207;C0041206
365	Ichthyosis, follicular atrophoderma & hypotrichosis	1	1	C0020757;C0020758
366	Inflammatory bowel disease, immunodeficiency, and encephalopathy	1	1	C4748708
367	Hypodysfibrinogenaemia	3	3	C0472803
368	AUTOIMMUNE LYMPHOPROLIFERATIVE SYNDROME, TYPE IB	1	1	C1328840
369	VON WILLEBRAND DISEASE, TYPE 1	1	1	C4017650;C1264039
370	Malformation of Cortical Development	56	2	C1955869
371	ACROCAPITOFEMORAL DYSPLASIA	1	1	C1843096
372	Candidiasis, familial, 6	1	1	C3151405
373	Dysmorphism	16	3	C1737329;C0000768
374	Osteogenesis imperfecta II/III	2	2	0
375	Porencephaly, type II	1	1	C0302892;C4082173;C0151860
376	Abnormality of coagulation	5	4	C1846821
377	Merosin deficiency, partial	1	1	0
378	Waardenburg syndrome 2 with pigmented macules	1	1	0
379	Short-stature type II collagenopathy, atypical	1	1	C2350002;C0453933;C1806781;C1282927
380	Spondyloepimetaphyseal dysplasia, Strudwick type	1	1	C0700635
381	Microhaematuria and proteinuria	2	2	C0033687
382	DENTIN DYSPLASIA, TYPE I, WITH EXTREME MICRODONTIA AND MISSHAPEN TEETH	1	1	C0399379
383	Modic changes	2	1	0
384	Cardiomyopathy & pulmonary emphysema	1	1	C0878544
385	Congenital Stationary Night Blindness, X-linked	1	1	C0339535
386	Tricuspid insufficiency	1	1	C0264778;C0040961
387	Hereditary angiopathy with nephropathy aneurysms and muscle cramps	1	1	C2673195
388	Spondylometaphyseal dysplasia, Algerian type	1	1	C1866688
389	Loss of weight	1	1	C1262477
390	Wagner Syndrome	1	1	C1840452
391	SYMPHALANGISM, PROXIMAL, 1B	1	1	C0039075
392	Dissection	2	1	C0012737;C0333288
393	Adiponectin deficiency	1	1	C2675518
394	Myocardial infarction, protection, association	1	1	C2751120;C3277063
395	FIBRINOGEN LONGMONT	1	1	C2584774;C1260903;C4016080
396	C1Q deficiency, type B	1	1	C3150902
397	SOLITARY MEDIAN MAXILLARY CENTRAL INCISOR	1	1	C1840235
398	Encephalopathy with cerebral calcification	3	1	0
399	Trigonocephaly 2	1	1	C3280974
400	MICROPHTHALMIA, SYNDROMIC 6	1	1	C1864689;C0005744;C0003119
401	ACHONDROGENESIS, TYPE II	1	1	C0220685
402	Hypophosphatasia	3	1	C1840322;C0268413;C0220743;C0020630;C0268412
403	Osteogenesis imperfecta III	11	7	C0268362
404	Macular degeneration, early-onset	1	1	C0024437;C0242383
405	Klippel-Feil syndrome	5	1	C1861689;C2751307;C0022738
406	EHLERS-DANLOS SYNDROME, CLASSIC-LIKE, 1	1	1	C1848029
407	Manitoba Oculotrichoanal Syndrome	1	1	C1855425
408	NGLY1-CDDG	1	1	C1425023
409	Aortic aneurysm, familial thoracic 9	1	1	C4015368
410	Autism spectrum disorder	2672	147	C1845243;C0524528
411	Charcot-Marie-Tooth disease, spinal	1	1	C0007959
412	Congenital stationary night blindness	12	1	C0339535
413	Hemophilia B	1	1	C0008533
414	Vascular anomalies	18	2	C0158570;C1961121
415	Crisponi/CISS1 syndrome	1	1	0
416	Glomerulopathy, X-linked	1	1	C0268731
417	MULLERIAN APLASIA AND HYPERANDROGENISM	1	1	C2675014;C1698581
418	BRAIN SMALL VESSEL DISEASE 1 WITH OCULAR ANOMALIES	1	1	C5193158
419	Osteogenesis imperfecta IIC	1	1	C0268358
420	Keratoconus	27	7	C0022578;C0339284;C1835677
421	Leukoencephalopathy with muscle symptons, brain small-vessel disease and infantile encephalopathy	1	1	0
422	DEAFNESS, AUTOSOMAL DOMINANT 9	1	1	C1842138;C1832425
423	Epidermolysis bullosa, dystrophic	2	1	C0079294
424	Deafness, autosomal dominant 8	1	1	C1832187
425	Porencephaly with microangiopathic haemolysis	1	1	0
426	Hereditary Pancreatitis	3	1	C0030305;C0238339
427	Chondrodysplasia	7	1	C0343284
428	Muscular dystrophy	30	3	C0410190;C2750785;C0026850
429	Alport syndrome, modifier of	1	1	C1567741
430	Von Willebrand disease, Vicenza type	1	1	C0042974
431	Robinow syndrome	6	2	C0265205
432	Intellectual disability, X-linked	30	1	C1845243
433	Reduced haemoglobin levels	1	1	0
434	Reduced thermostability	3	1	0
435	NEUROPATHY, HEREDITARY SENSORY AND AUTONOMIC, TYPE V	1	1	C0020075
436	OSTEOGENESIS IMPERFECTA, TYPE XVII	1	1	C0029434
437	Robin sequence	1	1	C0031900
438	Congenital heart defect	11	1	C1837341;C0018798;C0040761
439	Left-right axis malformation	2	1	C1866091
440	Chronic pancreatitis, protection against, association with	1	1	C1832108
441	CORNEAL DYSTROPHY, AVELLINO TYPE	1	1	C0002873;C1275685
442	Anhydramnios & echogenic kidneys	1	1	C0730379
443	Bone spicule pigmentary clumping in fundus & peripheral field constriction	1	1	0
444	Merosin deficiency	1	1	0
445	Platyspondylic lethal skeletal dysplasia Torrance type	1	1	C1835437;C0796173
446	ichthyosis vulgaris	1	1	C0079584
447	Diaphragmatic hernia, congenital	36	5	C0235833;C1857781
448	Neutropaenia, cyclic	1	1	C0221023
449	AMELOGENESIS IMPERFECTA, TYPE IG	1	1	C2931783
450	Stickler Syndrome, Dominant	3	3	C2020284;C0265253
451	Atrioventricular septal defect 2	1	1	C1853508
452	Vesicoureteral reflux 8	1	1	C4014831
453	Aortic dissection, Stanford type B	1	1	C0340643
454	Phenotype modifier, early-onset glaucoma	2	1	0
455	Ovarian cancer, association with	3	1	C0029925
456	Limb pelvis hypoplasia aplasia syndrome	1	1	C1848651
457	Collagen IV nephropathy	3	3	0
458	Ehlers-Danlos syndrome, dermatosparaxis type	1	1	C2700425
459	Metabolic disorder	3	1	C0025517
460	Haemochromatosis	11	1	C4016968;C0018995;C1865616
461	Multiple epiphyseal dysplasia 5	1	1	C1846843
462	Renal agenesis	19	6	C0542519;C1619700;C0007115
463	Height, association with	9	4	C0489786
464	PERSISTENT MULLERIAN DUCT SYNDROME, TYPE I	1	1	C1849930;C3897939
465	Slower APCE cleavage time, association with	1	1	0
466	OTOSPONDYLOMEGAEPIPHYSEAL DYSPLASIA, AUTOSOMAL RECESSIVE	1	1	C4520892
467	Glaucoma, primary open angle, association with	3	1	C0339573
468	Familial Encephalopathy with Neuroserpin Inclusion Bodies	1	1	C1858680
469	Polycythaemia vera	5	1	C0032463
470	Antithrombin deficiency, type II	1	1	C0272375
471	Visceral heterotaxy 5, autosomal	1	1	C3495537
472	Multiple joint contractures	1	1	C0158118
473	Idiopathic pulmonary fibrosis, association with	2	1	C0085786;C4016689
474	Ehlers-Danlos Syndrome, Dermatosparaxis Type	1	1	C2700425
475	CRISPONI/COLD-INDUCED SWEATING SYNDROME 2	1	1	C1853198
476	Dysspondyloenchondromatosis	1	1	C4302548
477	Osteoarthritis 1	1	1	C3887876
478	DIABETES MELLITUS, INSULIN-DEPENDENT, 2	1	1	C0011854;C1852092
479	Pseudoinflammatory Fundus Dystrophy	1	1	C2931034
480	Acral peeling skin syndrome	2	2	C1853354
481	WINCHESTER SYNDROME	1	1	C0432289
482	Osteogenesis imperfecta I/IV	2	2	C0029458;C0029456
483	Venous thromboembolic disease	1	1	C4016042;C1997614
484	OSTEOGENESIS IMPERFECTA, TYPE IIC	1	1	C4015949
485	von Willebrand Disease	1	1	C1264040;C0042974
486	Prostate cancer, increased risk	2	1	C0600139;C0376358
487	Abnormality of metabolism/homeostasis	6	1	C4021768
488	Tuberculosis, association with	1	1	C0041296
489	Hennekam lymphangiectasia-lymphedema syndrome 3	1	1	C4748408
490	Corneal dystrophy, Reis-Bucklers type	1	1	C0339278
491	Left ventricular obstruction with extracardiac anomalies	27	4	0
492	Bone fragility with contractures, arterial rupture, and deafness	1	1	C2676285
493	Interstitial lung disease	4	1	C0206062;C1970470
494	Multicentric Osteolysis-Nodulosis-Arthropathy	1	1	C0917715
495	Optic nerve hypoplasia	5	2	C0338502
496	Primordial dwarfism	9	1	C0013336;C3542022
497	Angioedema, hereditary with normal C1 inhibitor	1	1	C0002994
498	Multiple Epiphyseal Dysplasia, Dominant	5	5	C0026760
499	Ataxia	20	1	C0004134
500	Brachydactyly A1	1	1	C1862151
501	Increased CL-L1 serum levels	1	1	0
502	Hypertension, association with	15	1	C0020538;C1851511;C3837652
503	Asthma, non-allergic, association with	1	1	C0155880
504	Osteogenesis imperfecta, autosomal recessive	12	4	C3553887
505	FIBRINOGEN DUSART	1	1	C4016070
506	Persistent cloaca	26	8	C0266225
507	Recurrent miscarriage, association with	1	1	C0000809
508	Schizencephaly	2	1	C0266484
509	Thrombotic stroke	1	1	C0242129
510	Marfan's syndrome	1	1	C0024796;C0265227;C1321551
511	Megalocornea, spherophakia & secondary glaucoma	1	1	C0344530
512	Hypercholesterolemia	5	2	C0020443
513	Tropical calcific pancreatitis, association with	1	1	C1842402
514	von Willebrand disorder	1	1	C0042974
515	Asparaginase sensitivity	2	1	0
516	scoliosis	1	1	C0559260;C0036439;C0700208
517	SERKAL SYNDROME	1	1	C2678492
518	Von Willebrand disease, association with	1	1	C0042974
519	Acromicric dysplasia	1	1	C0265287
520	Acid-Labile Subunit Deficiency	1	1	C3900122
521	Hirschsprung disease 1	12	4	C0019569;C2931876;C3888239
522	microphthalmia	3	1	C0026010;C1864720
523	Amelogenesis imperfecta, autosomal dominant & dentin disorders	1	1	C0002452
524	SHORT STATURE AND ADVANCED BONE AGE, WITH EARLY-ONSET OSTEOARTHRITIS	1	1	C4540542
525	Arthrogryposis, lethal	1	1	C0003886
526	Premature ovarian failure & amenorrhoea	1	1	C1845295
527	Metaphyseal dysplasia, Spahr type	1	1	C0432225
528	Nephrotic syndrome, monogenic	12	2	C0027726
529	Spinocerebellar ataxia	14	1	C0087012
530	Factor II deficiency	1	1	C4016343;C0020640
531	Congenital Contractural Arachnodactyly	1	1	C0220668
532	HETEROTAXY, VISCERAL, 2, AUTOSOMAL	1	1	C1415817
533	Mental retardation, autosomal recessive 1	1	1	C0025362;C3714756
534	Lacrimo-auriculo-dento-digital syndrome	3	1	C0158667;C0265269
535	Connective tissue disorder & reduced bone mineral density	1	1	C0009782
536	ICHTHYOSIS VULGARIS	1	1	C0079584
537	affected deceased child	1	1	0
538	CADASIL2	1	1	C4225211
539	Cobblestone-like cortical malformation, white matter changes and cerebellar cysts	1	1	0
540	Waardenburg syndrome 2	5	1	C2700405
541	Glaucoma, primary open angle	23	8	C0339573;C1863926
542	Otitis media, susceptibility to	1	1	C0029882
543	Cold Induced Sweating Syndrome	1	1	C1832409;C1848947
544	Rolandic epilepsy with mental retardation and speech dyspraxia, X-linked	1	1	C1845070
545	Cataract, congenital	17	1	C0009691;C0001849
546	Progressive sensorineural hearing impairment	9	3	C1843156
547	Proteinuria and hematuria	7	3	0
548	PREMATURE OVARIAN FAILURE 14	1	1	C4693991
549	Weill-Marchesani syndrome with cervical artery dissection	1	1	0
550	Multiple congenital anomalies	121	7	C0000772;C1302790
551	HSPG2-Related Disorders	1	1	C1415793
552	Prostate cancer, reduced risk, association with	4	1	C0600139;C0376358
553	Ceroid lipofuscinosis, neuronal, 10	1	1	C1864669
554	Mental retardation 3, X-linked	1	1	C0796208
555	Schizophrenia, reduced risk, association with	4	1	C0036341
556	Macular dystrophy, vitelliform, 5	1	1	C4015343
557	Nephrotic Syndrome	4	1	C0403399;C0027726
558	Factor XIII deficiency	2	2	C2750481;C0015530
559	Portal hypertension, non-cirrhotic	1	1	C0020541
560	Dentin dysplasia, nonsyndromic	1	1	C0011430
561	Congenital myasthenic syndrome	22	3	C1850792;C0751882
562	Spondyloepimetaphyseal dysplasia	4	2	C2748544;C0432211
563	Spinocerebellar ataxia 27	1	1	C1836383
564	EPILEPTIC ENCEPHALOPATHY, EARLY INFANTILE, 61	1	1	C4552072
565	Rett-like syndrome	45	2	C0035372
566	Pancreatitis, chronic, association with	3	1	C1969419;C0149521
567	Connective tissue disease	1	1	C0009782
568	Pyle's disease	1	1	C0265294
569	Neuropathy, hereditary, with or without age-related macular degeneration	1	1	C0442874
570	Dysfibrinogenemia, congenital	3	3	C0272350
571	Ehlers-Danlos syndrome, type 4	1	1	C0268338
572	APLASIA OF LACRIMAL AND SALIVARY GLANDS	1	1	C0158667;C0265269
573	Dystonia 27	1	1	C4225336
574	Low bone mineral density, association with	3	1	C0029453
575	Dentin dysplasia 2	1	1	C0399380
576	Cortical malformations & polymicrogyria	1	1	C2748861
577	KININOGEN DEFICIENCY, TOTAL	1	1	C1856719;C0272340
578	Corneal dystrophy, Avellino	1	1	C0002873;C1275685
579	Laminin alpha 2-related dystrophy	1	1	C0532236;C1416776
580	Pancreatitis, autoimmune	2	1	C2609129
581	Hypoplastic left heart syndrome	30	2	C0152101;C3275750;C0018798;C0344783
582	3MC syndrome 2	1	1	C0796279
583	Cold-Induced Sweating Syndrome including Crisponi Syndrome	3	1	C0010412;C0024117;C0009264;C0234192;C0009443;C0041912
584	Axial muscle weakness, ptosis & respiratory failure	1	1	C1843697
585	Hypomaturation amelogenesis imperfecta	2	1	C0399372;C2750771
586	Growth/puberty delay	1	1	C4759871;C0018270;C0220844;C2911660;C1621966
587	Idiopathic basal ganglia calcification with laryngeal dystonia	1	1	0
588	Doyne honeycomb retinal dystrophy	1	1	C1852020;C1832174
589	Symphalangism, proximal 1B	1	1	C3809104
590	Avascular necrosis of the femur head	1	1	C0410480
591	Increased systolic blood pressure, association with	1	1	C0277884
592	SHORT STATURE, FACIAL DYSMORPHISM, AND SKELETAL ANOMALIES WITHOUT CARDIAC ANOMALIES	1	1	C0349588;C0013336
593	AMYLOIDOSIS, FAMILIAL VISCERAL	2	1	C0268389
594	Bruck Syndrome	1	1	C0432253
595	Ehlers-Danlos Syndrome, Kyphoscoliotic Form	1	1	C0013720
596	Fibrochondrogenesis	2	2	C0265282
597	Rare genetic deafness	41	4	0
598	Primary immunodeficiency disease	39	6	C0398686
599	Decreased plasma fibrinogen levels	3	1	0
600	Supravalvular aortic stenosis	1	1	C0003499
601	ERYTHROCYTOSIS, FAMILIAL, 5	1	1	C0152264
602	Microphthalmia	27	4	C0026010;C1864720
603	Brachydactyly	9	2	C0221357
604	Medulloblastoma	34	1	C0025149
605	Intervertebral disc disease	1	1	C0011854;C0158252;C4015963
606	Dilated Cardiomyopathy, Dominant	27	1	C0007193
607	Generalized atrophic benign epidermolysis bullosa	3	2	C0432326;C0014527
608	Joint hypermobility syndrome and descending perineum syndrome	1	1	0
609	Serum IgM levels, association with	1	1	0
610	Diabetes mellitus, type 1	2	1	C0011854
611	TAAD Family History	4	4	0
612	Cone rod dystrophy	7	1	C4085590;C4551714;C3489532
613	AMELOGENESIS IMPERFECTA, TYPE 1E	1	1	C1845053;C4016479;C0002452
614	Marfan syndrome & schizophrenia	1	1	C0024796
615	DEAFNESS, X-LINKED 6	1	1	C0011053;C0018772
616	PI NULL	1	1	C4017407;C4015815;C0221757
617	Peripheral pulmonary artery stenosis	2	1	C0345030
618	Lp	1	1	C0065058
619	Bilateral lens dislocation and glaucoma	1	1	0
620	Prothrombin Deficiency	1	1	C4016343;C0020640
621	Haemophilia B, severe	1	1	C0008533
622	Lumbar disc herniation, association with	1	1	C0281899
623	Robinow syndrome, autosomal dominant	3	1	C0265205;C0013261
624	ANGIOEDEMA, HEREDITARY, TYPE II	1	1	C1862892
625	Fundus dystrophy, Sorsby	1	1	C1850938
626	Myocardial infarction, association with	9	2	C0027051
627	Late-onset retinal degeneration	1	1	C1854065
628	Congenital disorder of glycosylation type 1v	1	1	0
629	positive thumb and wrist signs	1	1	0
630	Endometrial cancer, modified risk, in Lynch syndrome	30	1	C0476089
631	GALACTOSIALIDOSIS, EARLY INFANTILE	1	1	C4017294
632	Corneal dystrophy	6	2	C0010036
633	Steel syndrome	1	1	C3554594
634	Myosclerosis myopathy	1	1	C1850671
635	Sch√∂pf-Schulz-Passarge syndrome	1	1	0
636	Pulmonary nontuberculosis mycobacterial infection, susceptibility to	11	1	0
637	MACULAR DEGENERATION, AGE-RELATED, 1, SUSCEPTIBILITY TO	1	1	C1864205;C4017162;C0242383
638	Combined pituitary hormone deficiency	6	1	C0242343
639	Pulmonary atresia with ventricular septal defect and pulmonary stenosis	1	1	0
640	Chronic multifocal osteomyelitis	2	1	C0410422
641	Brachydactyly C	1	1	C1862103
642	Thrombophilia	6	3	C2749016;C0398623
643	Pseudoexfoliation glaucoma	1	1	C0206368
644	Amelogenesis imperfecta, nonsyndromic	6	3	C0002452
645	Manitoba-oculo-tricho-anal syndrome with renal agenesis	1	1	C0024726
646	Osteogenesis Imperfecta, Dominant	2	2	C0029434
647	Angioneurotic oedema	1	1	C1862892;C0002994;C0019243
648	White blood cell count, association with	6	1	C0023508;C0427512
649	thrombophilia due to antithrombin III deficiency	1	1	C0272375
650	Growth retardation & slow progression of puberty	1	1	C0151686
651	Proximal muscle weakness	4	1	C0221629
652	Retinal dystrophy, early-onset, severe	4	1	C0854723
653	Loss of function	1	1	0
654	Recurrent pregnancy loss	25	7	C2921106
655	Abnormality of coordination	4	1	C4023353
656	Barrett oesophagus/oesophageal adenocarcinoma	3	1	C3277074
657	FIBRINOGEN GIESSEN 4	1	1	C4016096
658	Myopathy, areflexia, respiratory distress, and dysphagia	1	1	C0026848
659	Von Willebrand disease 2a	1	1	C1282968
660	Ehlers-Danlos syndrome, type 1	3	3	C0268335
661	Thoracic aortic disorder, nonsyndromic	3	2	0
662	LTBP2-related Disorder	1	1	C1334351;C0292186
663	Macular degeneration, early-onset	1	1	C4015286
664	Infertility	2	1	C0021359
665	Lymphoedema, primary, Milroy-like	1	1	C1704423;C0238261;C0472691
666	Milroy disease	2	1	C1704423
667	Night blindness, congenital stationary 1	1	1	C0028077
668	Spondyloepimetaphyseal dysplasia, X-linked	1	1	C1848097
669	COL3A1-Related Disorder	1	1	C1413581
670	Asthma, atopic, association with	4	1	C4016217;C0155877
671	COL9A2-Related Disorders	1	1	C1413596
672	Connective tissue disease, autosomal dominant	1	1	C0009782
673	Dystonia	27	1	C1414216;C0013421
674	Myopathy, early-onset, areflexia, respiratory distress, and dysphagia	1	1	C3280679
675	C1Q deficiency, type A	1	1	C3150902
676	Hypotonia, muscle weakness, motor delay	1	1	C0026827
677	EHLERS-DANLOS SYNDROME, NONVASCULAR VARIANT	1	1	C0013720
678	Diabetes, permanent neonatal	13	1	C1833102;C1833104
679	Breast cancer, increased risk, association with	7	1	C0678222;C0006142
680	BETHLEM MYOPATHY 1	3	3	C1834674
681	Low bone density	1	1	C3266069
682	TETRAAMELIA SYNDROME 1	1	1	C4749055
683	MIRROR MOVEMENTS 4	1	1	C4748869
684	Marfanoid habitus and intellectual disability	65	3	0
685	Diabetic retinopathy	31	1	C0011884
686	FIBRINOGEN MARBURG	1	1	C4016069
687	Caffey-like disease, modifier of	1	1	C0020497
688	Manitoba oculotrichoanal syndrome	1	1	C1855425
689	Epidermolysis bullosa dystrophica, with subcorneal cleavage	1	1	C0079294
690	Renal hypodysplasia	12	2	C1619700;C3808069
691	Adult asthma, association with	1	1	0
692	Von Willebrand disease 1h	1	1	0
693	Charcot-Marie-Tooth disease, type 2	42	2	C0270914
694	Cortical malformations, occipital	1	1	C3279875;C3279878
695	Generalized hypotonia	21	1	C1858120
696	Coronary artery disease, association with	11	2	C0010054;C1838021
697	Epilepsy, lateral temporal, autosomal dominant	1	1	C0393682
698	FIBRINOGEN ISE	1	1	C4016077;C1260903
699	ICHTHYOSIS, CONGENITAL, AUTOSOMAL RECESSIVE 1, WITH OR WITHOUT BATHING SUIT DISTRIBUTION	1	1	C0079583;C0079154;C0020758
700	Severe congenital neutropenia autosomal dominant	1	1	C0340970
701	Catecholaminergic polymorphic ventricular tachycardia	8	1	C0349788;C1631597
702	Atrial septal defect	18	1	C3276096;C0018817;C1861101
703	Growth hormone deficiency 2	1	1	0
704	Galactosialidosis, early infantile	1	1	C4017294
705	Osteoarthritis of the hip, increased risk	2	2	C0029410
706	Microspherophakia	1	1	C1562061
707	Situs ambiguus	1	1	C0037221;C3495537
708	Fraser syndrome 2	1	1	C4540036
709	Osteoporosis	1	1	C0029456
710	Intervertebral disc disease	1	1	C0158252
711	CORTICAL MALFORMATIONS, OCCIPITAL	1	1	C3279875;C3279878
712	Acid-labile subunit deficiency	1	1	C3900122
713	Diabetes, type 2, susceptibility, association with	1	1	C0011860
714	Scoliosis, idiopathic, association with	1	1	C0595995
715	Aortic aneurysm, familial thoracic 10	1	1	C4284414
716	Trachomatous trichiasis infection, association with	1	1	0
717	Caffey disease	1	1	C1861980;C0020497
718	Partial Epilepsy with Auditory Features	1	1	C1838062
719	Ocular malformation	1	1	C1864689
720	ECTODERMAL DYSPLASIA 14, HAIR/TOOTH TYPE WITH HYPOHIDROSIS	1	1	C4749123
721	Reduced mRNA expression, in carriers	1	1	0
722	Encephalopathy, familial, with neuroserpin inclusion bodies	1	1	C1858680
723	colon cancer	7	1	C0007102;C1837315
724	Hearing loss, unilateral/asymmetric, non-syndromic	1	1	C0521785
725	Spontaneous cervical artery dissections	1	1	0
726	Corneal dystrophy, Thiel-Behnke	1	1	C1562894
727	MASS SYNDROME	1	1	C1858556
728	Intellectual and developmental disabilities	9	1	0
729	Wilms tumor 1	2	1	C0027708
730	Cyclic haematopoiesis	1	1	C0221023
731	Balkan endemic nephropathy	3	2	C0004698;C4049993
732	DIAPHANOSPONDYLODYSOSTOSIS	1	1	C1842691
733	Von Willebrand disease 1	1	1	C1264039
734	HYPOGONADOTROPIC HYPOGONADISM 6 WITH OR WITHOUT ANOSMIA	1	1	C3552574;C0342384
735	Primary familial brain calcification	5	1	C4324314
736	Preterm premature rupture of membranes, increased risk	8	1	C0729264
737	Atrioventricular septal defect 2	1	1	C1853508;C1853509
738	Ehlers-Danlos syndrome, classic type, 1	2	2	C4552122
739	Ischaemic stroke, increased risk	4	1	C0948008
740	Acromicric dysplasia	2	2	C0265287
741	Brachydactyly, type C with angel-shaped phalanx	1	1	C0221357
742	46,XY gonadal dysgenesis / 46, XX karyotype	1	1	C0018054
743	Kyphosis	1	1	C0022821;C0022822;C0265673
744	Respiratory failure, neonatal	2	1	C0521648
745	Metabolic myopathy	2	1	C0270984
746	Mental retardation, X-linked 3	1	1	C0796208
747	Manitoba-oculo-tricho-anal syndrome with renal dysplasia	1	1	C0024726
748	Hereditary Angioedema	2	2	C0019243
749	Diabetes mellitus, neonatal	7	1	C0158981
750	Myopathy	33	5	C0026848
751	Malattia leventinese	1	1	C1852020;C1832174
752	Epidermolysis bullosa dystrophica with amniotic band syndrome	1	1	0
753	Bethlem myopathy	3	3	C0410179;C1834674
754	Splenic epidermoid cyst	1	1	0
755	Thrombophilia due to heparin cofactor 2 deficiency	1	1	C0398626
756	Reduced adAMTS6 protein secetion	1	1	0
757	Alzheimer disease, early onset	7	1	C0750901;C0002395;C1843013
758	Schizophrenia, severe, increased risk, association	1	1	C0036341
759	MEGALOCORNEA	1	1	C0344530
760	Obesity, morbid, susceptibility to	1	1	C0028756
761	Hypertension, reduced risk, association with	3	1	C0020538
762	Diaphyseal dysplasia	1	1	C0011989
763	Venous thromboembolism	12	6	C1861172
764	Leukaemia, risk, association with	26	4	C0023418
765	Mullerian aplasia and hyperandrogenism	1	1	C2675014
766	EMG: myotonic runs	1	1	C0180677;C0013839;C0200204
767	ULLRICH CONGENITAL MUSCULAR DYSTROPHY 1, AUTOSOMAL DOMINANT	1	1	C4225636
768	Split Hand-Foot malformation	1	1	C0221373
769	Osteogenesis imperfecta, severe	1	1	C0029434
770	Interstitial pneumonitis	2	1	C0206061
771	Primary familial hypertrophic cardiomyopathy	44	1	C3495498;C0007194;C0949658
772	Atrioventricular septal defect	10	3	C1389016
773	Gastric cancer, association with	4	1	C0024623
774	Hearing loss and eye abnormailities	1	1	0
775	Osteoarthritis, early progressive, with spondyloepiphyseal dysplasia	1	1	C0029408
776	Syndromic deafness	1	1	C1853144
777	Unverricht-Lundborg syndrome	1	1	C0751785;C0751778
778	Osteogenesis imperfecta 10	1	1	C3151211
779	METHYLMALONIC ACIDEMIA AND HOMOCYSTEINEMIA, cblX TYPE	1	1	C0796208
780	BETHLEM MYOPATHY 2	1	1	C4225313
781	Muscular dystrophy, limb-girdle	33	3	C0686353
782	Monogenic diabetes	39	2	C3888631
783	Nonsyndromic hearing loss, X-linked	1	1	C3711374
784	Premature ovarian failure, association with	4	1	C0025322
785	Cutis Laxa, Dominant/Recessive	1	1	C0010495
786	Knobloch Syndrome	1	1	C1849409
787	Familial Pulmonary Fibrosis	2	1	0
788	Ocular & skeletal abnormalities	2	2	C3150968
789	Multiple synostoses and craniosynostosis	1	1	0
790	Gonadal dysgenesis, partial, with minifascicular neuropathy	1	1	C0041408;C0018051
791	Diffuse lung disease	1	1	0
792	Megalocornea, X-linked	1	1	C0344530
793	Minicore myopathy	2	1	C1850674
794	Leptin deficiency	1	1	C3554224
795	Spinocerebellar Ataxia, Dominant	9	2	C0087012
796	Alport syndrome, X-linked recessive	1	1	C1567741
797	Robinow syndrome, autosomal dominant 1	1	1	C0265205
798	Inflammatory skin & bowel disease	1	1	0
799	Anophthalmia & blepharophimosis	1	1	C1864689;C0005744;C0003119
800	Thin upper lip vermilion	2	1	C1865017
801	Bruck syndrome 2	1	1	C1836602
802	ISOLATED GROWTH HORMONE DEFICIENCY, TYPE IA	1	1	C0271561;C0342573
803	Skeletal, skin, cardiovascular and cerebrovascular anomalies with frontoparietal polymicrogyria and developmental delay	1	1	C0037253
804	Increased nuchal translucency, tricuspid regurgitation & limb defects	1	1	C4023676
805	Rolandic epilepsy	21	1	C0376532
806	Trichomegaly	1	1	C0854699
807	Corneal dystrophy, granular type II	1	1	C1275685
808	CONTRACTURAL ARACHNODACTYLY, CONGENITAL	1	1	C0220668
809	Myosclerosis	1	1	C1611706
810	Anosmia, isolated congenital	3	1	C0393778
811	Partial iodide organification defect	1	1	C1291299
812	Night blindness, congenital stationary	5	1	C0339535
813	Disc degeneration	1	1	C0158266
814	Epilepsy, progressive myoclonus	13	2	C0751783;C0751778
815	Occipital pachygyria	1	1	C3279875;C3279878
816	Corneal dystrophy, lattice intermediate type I/IIIA	1	1	C1690006
817	Distal shortening of limbs	1	1	C1840307
818	Robinow syndrome, autosomal recessive	2	1	C1849334
819	Progressive Pseudorheumatoid Arthropathy of Childhood	1	1	C0432215
820	Intellectual disability, microcephaly and pontocerebellar hypoplasia	4	1	C3714756
821	BMP4 variant	1	1	0
822	Ovarian cancer, epithelial, increased risk	6	1	C0919267;C1140680
823	Hypogonadotropic hypogonadism 6 with or without anosmia	1	1	C2675188;C0342384;C3552574;C4016670
824	CONGENITAL DISORDER OF DEGLYCOSYLATION	1	1	C3808991
825	Aganglionosis, in Hirschsprung disease	2	2	C0019569
826	MYASTHENIC SYNDROME, CONGENITAL, 19	1	1	C0751882
827	AMYLOIDOSIS, CEREBROARTERIAL, ICELANDIC TYPE	1	1	C1527338
828	Diabetes, type 2, association with	35	2	C0011860;C3275844
829	Myopathy with cortical and cerebellar atrophy	1	1	0
830	Bicuspid aortic valve	36	8	C0149630
831	Alpha-2-plasmin inhibitor deficiency	1	1	C2752081;C3489734
832	Progressive pseudorheumatoid dysplasia	1	1	C0432215
833	COL9A1-Related Disorders	1	1	C1413595
834	Tumoral calcinosis, familial, hyperphosphatemic	1	1	C1876187
835	Nephropathy, reduced risk, association with	1	1	C0022658
836	Sternum curvature	1	1	0
837	Ehlers-Danlos syndrome IV, vascular-type	1	1	0
838	Abolition of tyrosine sulphation	1	1	0
839	Myocardial infarction, increased risk	3	1	C0428953;C0027051
840	SPONDYLOEPIMETAPHYSEAL DYSPLASIA, STRUDWICK TYPE	1	1	C0700635
841	Stiff Skin Syndrome	1	1	C1861456
842	Glaucoma	12	4	C0017601
843	Antithrombin deficiency, type I	1	1	C0272375
844	Aortic aneurysm	9	3	C0003486;C0162871
845	Von Willebrand disease 3	1	1	C1264041;C1264039
846	Congenital central hypoventilation syndrome	3	1	C0019569;C1275808;C4310966
847	Arthrogryposis, distal, 9	1	1	C0220668
848	Torg-Winchester syndrome	1	1	C1850155
849	HYPERPROINSULINEMIA	1	1	C0342283
850	Overgrowth & Loeys-Dietz syndrome	1	1	C1849265
851	Obesity	47	3	C4016341;C0028754
852	Empty follicle syndrome	4	2	C1328577
853	Relative macrocephaly	1	1	C1849075
854	Diabetes mellitus, permanent neonatal	2	1	C1833104;C0342277;C0011860
855	Microcephaly and intellectual disability	4	1	0
856	ICHTHYOSIS, CONGENITAL, AUTOSOMAL RECESSIVE 1, WITH BATHING SUIT DISTRIBUTION	1	1	C0020758
857	Spondyloepimetaphyseal dysplasia, Missouri type	1	1	C1865832
858	Glomerulopathy with fibronectin deposits 2	1	1	C1866075
859	Nonsyndromic Hearing Loss, Mixed	4	1	C3711374
860	Single median maxillary central incisor	1	1	C1840235
861	Thin basement membrane disease	3	2	C0403440;C0241908
862	BARRETT ESOPHAGUS/ESOPHAGEAL ADENOCARCINOMA	2	1	C3277074
863	FIBRINOGEN PHILADELPHIA	1	1	C0314561
864	Ehlers-Danlos syndrome	15	10	C0268335;C0013720
865	Corneal dystrophy, lattice type IIIA	1	1	C0155127;C1837974
866	QT interval, association with	20	1	C0429028
867	Deafness with labyrinthine aplasia microtia and microdontia	1	1	C1853144
868	Recurrent infections	16	2	C0239998
869	Tetralogy of Fallot with other cardiac abnormalities	7	1	0
870	Hennekam lymphangiectasia-lymphedema syndrome 1	1	1	C0340834
871	Lens subluxation	1	1	C0023316
872	Recessive dystrophic epidermolysis bullosa	1	1	C0079474;C0014527
873	Achondrogenesis 2	1	1	C0220685
874	Ehlers-Danlos syndrome VIIc	1	1	C3508775
875	Lethal congenital contracture syndrome 11	1	1	C4310670
876	Familial Visceral Amyloidosis	3	1	C0268389
877	RETINITIS PIGMENTOSA 56	1	1	C3150819;C0339526
878	Factor X Deficiency	1	1	C0015519
879	Chiari malformation, type I	3	1	C0750929
880	EDSKSCL1	1	1	C0268342
881	Intracerebral haemorrhage, foetal	1	1	C2937358
882	HYPOGONADOTROPIC HYPOGONADISM 20 WITH ANOSMIA, SUSCEPTIBILITY TO	1	1	C4016854
883	Sensory and autonomic neuropathy	8	1	0
884	Epidermolysis bullosa, recessive dystrophic	1	1	C0079474
885	Growth retardation	3	1	C1837475;C0151686
886	Tourette syndrome	147	9	C0040517
887	Multiple epiphyseal dysplasia / pseudoachondroplasia	1	1	C0026760
888	MYOPATHY, MYOFIBRILLAR, 7	1	1	C2678065
889	Respiratory failure in infancy	1	1	C1843487
890	Ectopia lentis, isolated form	2	2	C3541474
891	GLAUCOMA 3, PRIMARY CONGENITAL, D	1	1	C2751316;C1562061;C1533041
892	Tetralogy of Fallot	37	3	C0039685;C3276096
893	Alzheimer disease 18	1	1	C3810041
894	Osteogenesis imperfecta type I	2	2	C0023931;C0268363
895	Wagner's vitreoretinal degeneration	1	1	0
896	Progeroid facial features & lipodystrophy	1	1	0
897	Neural tube defects	35	1	C0027794
898	Cleft lip and/or palate	33	6	C0008924
899	Delayed speech and language development	20	1	C0454644
900	INFLAMMATORY BOWEL DISEASE, IMMUNODEFICIENCY, AND ENCEPHALOPATHY	1	1	C0021390
901	Cognitive decline	1	1	C0338656
902	FACTOR XIII, A SUBUNIT, DEFICIENCY OF	1	1	C2750514
903	Increased risk of death in CAD, association with	1	1	0
904	Mucopolysaccharidosis IX	1	1	C1291490
905	Reduced angiotensinogen levels	1	1	0
906	FGA-Related Disorders	1	1	C4724716;C1414592
907	Pneumonia, idiopathic interstitial	1	1	C0085786;C2350236
908	MARFANOID-PROGEROID-LIPODYSTROPHY SYNDROME	1	1	C4310796
909	Microcornea, cataract & cone-rod dystrophy	1	1	C0266544
910	Epileptic encephalopathy, early onset, with burst suppression	10	1	C0543888
911	Myocardial infarction	11	1	C1832662;C0155626;C0027051
912	Gastric cancer, diffuse	3	1	C0699791;C0024623
913	Ehlers-Danlos syndrome, hypermobile	1	1	C0268337
914	Corneal dystrophy, combined granular-lattice type, variant of	1	1	C0010036
915	CAMURATI-ENGELMANN DISEASE	1	1	C0011989
916	Primary amenorrhea with Mullerian Duct abnormality	1	1	C2675014;C1698581
917	DEAFNESS, AUTOSOMAL DOMINANT NONSYNDROMIC SENSORINEURAL 39, WITH DENTINOGENESIS IMPERFECTA 1	1	1	C0011053;C0018772
918	NAIL DISORDER, NONSYNDROMIC CONGENITAL, 4	1	1	C3277900;C0265998
919	LIPOID PROTEINOSIS OF URBACH AND WIETHE	1	1	C0023795;C0264511
920	Lower plasma triglyceride level, association with	1	1	C4014555
921	bilateral myopia	1	1	C2881345
922	Aortic dissection and regurgitation	3	1	0
923	CZECH DYSPLASIA	1	1	C1836683
924	Deafness, autosomal dominant, 13	1	1	C1866095
925	Metaphyseal Chondrodysplasia	2	1	C1859148;C0265290
926	Kabuki syndrome	10	1	C3275495;C0796004
927	Macular dystrophy, vitelliform, 4	1	1	C4015342
928	Visual impairment	3	1	C0042798;C3665347
929	Dysmorphism & skeletal deformity	1	1	C1737329;C0000768
930	Robinow syndrome, autosomal dominant 1	1	1	C0265205
931	DEAFNESS, CONGENITAL, WITH INNER EAR AGENESIS, MICROTIA, AND MICRODONTIA	1	1	C1853144
932	Galactosialidosis	1	1	C0268233
933	Altered N-acetylglucosamine binding	1	1	0
934	Ovarian endometreosis	1	1	0
935	Hypobetalipoproteinaemia	4	1	C1862596;C0020597
936	Reduced protein cleavage by ADAMTS13	1	1	0
937	OTITIS MEDIA, SUSCEPTIBILITY TO	1	1	C0029882
938	Amelogenesis imperfecta & gingival hyperplasia syndrome	1	1	C2931783
939	INFLAMMATORY SKIN AND BOWEL DISEASE, NEONATAL, 1	1	1	C4751120
940	Episodic ataxia	12	1	C1719788;C1720189
941	CUTIS LAXA, AUTOSOMAL RECESSIVE, TYPE IC	1	1	C0268351;C2750804
942	Myofibrillar myopathy	10	1	C2751831;C2678065
943	Alopecia areata, association with	1	1	C0002170
944	Diaphanospondylodysostosis	1	1	C1842691
945	Porencephaly 2	1	1	C3280970;C0151860
946	Bullous dermolysis of the newborn	1	1	0
947	Macular degeneration	3	1	C1863534;C0339512;C2675210;C0024437
948	Hearing loss, sensorineural, nonsyndromic	4	1	C0018784
949	Caffey Disease	1	1	C1861980;C0020497
950	Supravalvar pulmonary stenosis	1	1	0
951	Gastroparesis	1	1	C0152020
952	Trichomegaly	1	1	C0854699
953	Collodion, self-healing	1	1	C0020758
954	Long QT syndrome	110	3	C2678484;C0023976
955	DYSTONIA 27	1	1	C4225336
956	Marshall / Stickler syndrome	1	1	C4015965
957	LEPTIN DEFICIENCY	1	1	C3554224
958	Craniosynostosis, nonsyndromic	30	4	C0010278
959	Amyloidosis 8	4	1	C0268389
960	Anti-SEMA4D Monoclonal Antibody VX15/2503	1	1	C3272653
961	CHARGE SYNDROME	1	1	C0265354
962	Sarcoidosis, increased risk, association with	2	2	C0036202
963	Bifid nose, with or without anorectal and renal anomalies	1	1	C2750433
964	EPITHELIAL RECURRENT EROSION DYSTROPHY	1	1	C1852551
965	OSTEOARTHRITIS SUSCEPTIBILITY 1	1	1	C3887876;C0029410
966	KLIPPEL-FEIL SYNDROME 1, AUTOSOMAL DOMINANT	1	1	C1861689
967	Retinitis pigmentosa, autosomal recessive/Leber congenital amaurosis	2	1	C0339526
968	Schwartz-Jampel syndrome	1	1	C0036391
969	Seizures, new onset & status epilepticus	1	1	C0748604
970	RAINE SYNDROME	1	1	C1850106
971	Obesity, early-onset & metabolic syndrome	1	1	C0028754
972	UNCOMBABLE HAIR SYNDROME 3	1	1	C4749066
973	Porencephaly 1	1	1	C1867983
974	HYPOPHOSPHATEMIC RICKETS, AUTOSOMAL RECESSIVE, 1	1	1	C0342643
975	Recurrent miscarriage	6	2	C0000809
976	Reduced elbow extension	1	1	0
977	Upshaw-Schulman syndrome	1	1	C0034155;C1268935
978	Lipoid proteinosis	1	1	C0023795;C0264511
979	Hearing impairment	43	4	C1832187;C1384666
980	EMARDD	1	1	C3280679
981	CEREBRAL ARTERIOPATHY, AUTOSOMAL DOMINANT, WITH SUBCORTICAL INFARCTS AND LEUKOENCEPHALOPATHY, TYPE 2	1	1	C0751587
982	Progeroid fibrillinopathy	1	1	0
983	Kallmann syndrome	33	7	C0162809;C1563719;C4016502
984	Congenital high airways obstruction syndrome	1	1	C3665871
985	Retinal disease	58	3	C0035309
986	Reduced circulating vaspin concentrations	1	1	0
987	Dysmorphic facies, microcephaly, ptosis and contractures	1	1	C0424503
988	Malformations of cortical development	9	1	C1955869
989	Hypothyroidism	25	1	C0020676;C0342195
990	Permanent Neonatal Diabetes Mellitus	5	2	C1833104
991	Epileptic encephalopathy, early infantile, 47	1	1	C4310685
992	Marshall Syndrome	1	1	C0265235
993	FRASER SYNDROME 2	1	1	C4540036
994	Increased TGFB1 secretion	1	1	0
995	Intracerebral haemorrhage, late-onset	1	1	C3281105
996	Nail disorder, non-syndromic congenital, 4	1	1	C3277900
997	46,XX sex reversal with dysgenesis of kidneys, adrenals, and lungs	1	1	C2678492
998	Cutis laxa and arterial tortuosity	1	1	0
999	RETICULATE ACROPIGMENTATION OF KITAMURA	1	1	C3714534;C0406811
1000	Nephrotic syndrome, late onset	2	1	C0027726
1001	ARTHROGRYPOSIS MULTIPLEX CONGENITA, NEUROGENIC, WITH MYELIN DEFECT	1	1	C1859721
1002	Brachydactyly type A1	2	1	C1862151
1003	ANTICHYMOTRYPSIN BOCHUM 1	1	1	C4015793
1004	Multicentric osteolysis, nodulosis & arthropathy	1	1	C0917715
1005	Fibrillinopathy	1	1	0
1006	Deafness, non-syndromic, autosomal dominant	5	1	C1865366
1007	Dentinogenesis imperfecta type I	1	1	C0399378;C4016014;C2973527
1008	Laryngoonychocutaneous Syndrome	1	1	C1328355
1009	CYCLIC NEUTROPENIA	1	1	C0221023
1010	Familial hematuria	2	2	C1305904
1011	Cone-rod dystrophy	52	2	C0035334
1012	Muscular dystrophy without contractures	1	1	0
1013	3MC syndrome 3	1	1	C0796032
1014	Cancer, increased risk	1	1	C1306459;C0260515;C0006826
1015	ARTHROPATHY, PROGRESSIVE PSEUDORHEUMATOID, OF CHILDHOOD	2	1	C0432215
1016	SPINOCEREBELLAR ATAXIA 27	1	1	C1836383
1017	Ichthyosis, congenital, autosomal recessive 11	1	1	C1835851
1018	Colonic disease in CARD15 mutation positive individuals, association	1	1	0
1019	Thrombocytopaenia	34	3	C0040034;C4016329;C3853779
1020	Ehlers-Danlos syndrome, type vii, autosomal recessive	1	1	C2700425
1021	SERKAL syndrome	1	1	C2678492
1022	46,XY disorder of sex development	45	5	C2751824
1023	C1q DEFICIENCY	1	1	C3150902
1024	Colon polyps	9	1	C0009376
1025	Macular degeneration, age related, neovascular, association with	1	1	C0271084
1026	Multiple synostoses syndrome 4	1	1	C4693531
1027	PYCNODYSOSTOSIS	1	1	C0238402
1028	Severe neurodegeneration, microcephaly & hypomyelination	1	1	0
1029	Antiplasmin alpha 2 deficiency, severe	1	1	C0398620
1030	HYPOCHONDROGENESIS	1	1	C0542428;C2745959
1031	Epistaxis and telangiectasia	1	1	0
1032	Pierson syndrome/ nephrotic syndrome type 5	1	1	C1836876
1033	Fraser syndrome	3	2	C0265233
1034	Schizencephaly	4	1	C0079541;C0266484
1035	Klippel-Feil syndrome 1, autosomal dominant	1	1	C1861689
1036	PORETTI-BOLTSHAUSER SYNDROME	1	1	C4014821
1037	CUTIS LAXA, AUTOSOMAL RECESSIVE, TYPE 1B	1	1	C3665335
1038	Spondyloepimetaphyseal dysplasia, X-linked	1	1	C1848097
1039	Loeys-Dietz syndrome, type 4	1	1	C3553762
1040	Retinitis pigmentosa, autosomal dominant	26	2	C1835895;C0339525
1041	XX sex reversal, PPK and SCC	1	1	C2936419
1042	Holoprosencephaly	15	3	C1835819;C0079541
1043	Hearing impairment, autosomal recessive	3	1	C1864818
1044	Corneal dystrophy, lattice type 3A	1	1	C1837974
1045	Intracerebral haemorrhage	1	1	C2937358;C1867983
1046	Alport syndrome, autosomal-dominant	1	1	C1567743
1047	Thoracic ossification of ligamentum flavum, long regional form	1	1	0
1048	Corneal dystrophy, Reis-B√ºcklers	1	1	C0010036
1049	Deafness, autosomal dominant, 56	1	1	C3810170
1050	OSTEOPETROSIS, AUTOSOMAL RECESSIVE 2	1	1	C4272578;C1850126
1051	Sorsby fundus dystrophy	1	1	C1850938
1052	Marfan syndrome	9	4	C3541518;C0024796
1053	Winchester disease	2	2	C1850155;C0432289
1054	Short stature with skeletal abnormalities	1	1	0
1055	DEAFNESS, AUTOSOMAL RECESSIVE 98	1	1	C0011053;C0018772
1056	Macular dystrophy, unspecified	2	1	C0024437;C0339508;C0730292
1057	Childhood Onset Schizophrenia	18	2	C0036346
1058	Otospondylomegaepiphyseal dysplasia, autosomal dominant	1	1	C1848488
1059	Left ventricular obstruction with extracardiac anomalies & Neurodevelopmental disorder	18	1	0
1060	Stroke, childhood-onset	1	1	C1843512
1061	Breathing dysregulation	1	1	C3808046
1062	Failure to thrive, motor delay, speech delay, intellectual disability	3	1	C3887638;C0015544;C2315100
1063	Midaortic syndrome	6	1	0
1064	Proteinuria	7	2	C1279888;C0033687
1065	Collagen Type VI-Related Disorders	3	3	C0009336
1066	Acrocapitofemoral dysplasia	1	1	C1843096
1067	Cold-induced sweating syndrome	2	1	C1853198;C1832409
1068	Spondyloepimetaphyseal dysplasia congenita	1	1	C0700635
1069	Platyspondylic lethal skeletal dysplasia Torrance type	1	1	C1835437
1070	Weissenbacher-Zweymuller Syndrome	1	1	C1848488
1071	Goitre	5	1	C1291299;C0018021
1072	Czech dysplasia	1	1	C0038015;C1836683
1073	FOREBRAIN DEFECTS	1	1	C1861235
1074	Rolandic epilepsy, oral dyspraxia, mental retardation	1	1	C1845070
1075	Osteoarthritis, early-onset	5	3	C1846845
1076	Familial Atypical Mycobacteriosis, Autosomal Recessive	4	1	C3266863
1077	Ullrich congenital muscular dystrophy	4	4	C0410179
1078	DZ twinning, association with	1	1	0
1079	BLADDER EXSTROPHY AND EPISPADIAS COMPLEX	7	5	C1838703
1080	Metaphyseal anadysplasia	2	2	C0432226;C2748495
1081	Female infertility	6	1	C0021361
1082	Abnormality of brain morphology	78	2	C4021085
1083	Absent vertebral body mineralization	1	1	C1860191
1084	Ehlers-Danlos Syndrome, Arthrochalasia Type	1	1	C0268345
1085	Abnormality of the skeletal system	12	1	C4021790
1086	SHORT STATURE, FACIAL DYSMORPHISM, AND SKELETAL ANOMALIES WITH CARDIAC ANOMALIES	1	1	C0349588;C0013336
1087	NASODIGITOACOUSTIC SYNDROME	1	1	C1850627
1088	Monogenic Non-Syndromic Obesity	4	1	0
1089	Dysmorphic facies	1	1	C0424503
1090	Bart syndrome	1	1	C0268371;C0432322
1091	FACTOR X DEFICIENCY	1	1	C0015519
1092	Cleft palate	11	1	C0008925;C1844830
1093	Telangiectasia, hereditary hemorrhagic, 5	1	1	C3809710
1094	EPIDERMOLYSIS BULLOSA, PRETIBIAL, AUTOSOMAL RECESSIVE	1	1	C4015945;C0079294
1095	Late onset limb-girdle muscular dystrophy	1	1	0
1096	Platyspondylic skeletal dysplasia, Torrance	1	1	C1835437;C0796173
1097	Liver cirrhosis, association with	2	2	C0023890
1098	Tall stature, archnodactyly, hyperextensible joints, hypertelorism, and bfid uvula	1	1	C0241240
1099	Familial Erythrocytosis	3	1	C0152264
1100	Premature ovarian insufficiency	47	3	C0025322
1101	Myocardial infarction, susceptibility, association	1	1	C1832662
1102	Periodontitis, aggressive, association with	3	1	C0031106
1103	Abnormality of the intestine	2	1	C4316788
1104	Epilepsy, focal idiopathic	1	1	C0014544
1105	Bicuspid aortic valve and aortopathy in Turner syndrome, association with	1	1	0
1106	NGLY1-related disorder	1	1	C1425023
1107	3MC SYNDROME 3	1	1	C0796032
1108	Pancreatitis, chronic	5	1	C0149521;C0030305;C0238339
1109	Rickets, hypophosphataemic, autosomal dominant	1	1	C0342642
1110	AORTIC ANEURYSM, FAMILIAL THORACIC 10	1	1	C0340629;C0003486
1111	Schizencephaly, bilateral	1	1	C1855775
1112	Asthma, reduced risk, association with	1	1	C0004096
1113	KNOBLOCH SYNDROME 1	1	1	C1849409
1114	ureteropelvic junction obstruction	1	1	C0521619
1115	Tall stature	3	1	C0241240
1116	Heterotaxy Syndrome	3	2	C3178805
1117	Neuronal Ceroid-Lipofuscinosis, Dominant/Recessive	3	1	C0027877
1118	Hereditary mixed polyposis syndrome	1	1	C5192681
1119	GROWTH RESTRICTION, SEVERE, WITH DISTINCTIVE FACIES	1	1	C4225623
1120	Autosomal recessive cutis laxa type 1B	1	1	C4016894
1121	3MC SYNDROME 1	1	1	C0796059
1122	CANDIDIASIS, FAMILIAL, 6	1	1	C0006840
1123	Congenital afibrinogenemia	3	3	C2584774;C1260903;C4016080
1124	Haemophilia B, skewed X-inactivation	1	1	C0008533
1125	Left ventricular obstruction	60	4	0
1126	Ectopia lentis	3	3	C0024796;C0013581
1127	Gonadotropin deficiency	1	1	C0020619;C4552011;C0271623
1128	Ehlers-Danlos syndrome VII	1	1	C1857034
1129	Retinitis pigmentosa 35	1	1	C1853214
1130	Ehlers-Danlos Syndrome, Vascular Type	1	1	C0268338
1131	KEUTEL SYNDROME	1	1	C1855607
1132	Ehlers-Danlos syndrome, type 3	2	2	C0268337
1133	Isolated Growth Hormone Deficiency	2	1	C0013338;C4016761;C2826280;C0338503
1134	Hearing loss, sensorineural	23	6	C0018784
1135	Factor XIII Subunit A Deficiency	1	1	C2750514
1136	Hypofibrinogenaemia with hepatic storage	1	1	0
1137	SCHWARTZ-JAMPEL SYNDROME, TYPE 1	1	1	C0036391
1138	Abnormality of dental enamel	1	1	C4021800
1139	Language impairment	14	2	C0023015;C1843013
1140	Porencephaly & small-vessel disease	1	1	C0302892;C0151860;C4082173
1141	Multiple synostoses syndrome 4	1	1	C4693531
1142	Cardiac defects	8	1	C0741916
1143	EPIPHYSEAL DYSPLASIA, MULTIPLE, 1	1	1	C1838280;C0026760
1144	Monoclonal B-Cell Lymphocytosis	11	1	C2698259
1145	Ossification of posterior longitudinal ligament, association with	1	1	C0206366
1146	Intracranial vertebral-basilar artery dissection, susceptibility to	10	3	0
1147	Transglutaminase 1 deficiency	1	1	0
1148	FACTOR VII DEFICIENCY	1	1	C0015503
1149	Hematuria	1	1	C0018965
1150	POLYMICROGYRIA WITH VASCULAR-TYPE EHLERS-DANLOS SYNDROME	1	1	C5193159
1151	Primary ovarian insufficiency	59	12	C0025322;C0085215;C0041408
1152	Atrial fibrillation and pulmonary artery aneurysms	1	1	0
1153	Ganglioneuroma/neuroblastoma	1	1	C0017075
1154	Periodontal disease	1	1	C0031090
1155	Pulmonary artery dilatation	1	1	C0428851;C0685732
1156	Lymph vessel dysplasia	1	1	C0340834
1157	Haemophilia B	1	1	C0008533
1158	Hypodontia	4	2	C1835492;C0020608
1159	Amelogenesis imperfecta 1E	1	1	C1845052;C1845053
1160	CORNEAL DYSTROPHY, FUCHS ENDOTHELIAL, 1	1	1	C0016781;C1852795;C1850959
1161	Macular degeneration, age related, association with	1	1	C0242383
1162	Muscular dystrophy, congenital, due to partial LAMA2 deficiency	1	1	C1842898
1163	Knee osteoarthritis, association with	1	1	C0409959
1164	Hearing loss, non-syndromic sensorineural	5	1	C1384666;C0011053;C0018772
1165	Thoracic aortic aneurysm	8	3	C0162872
1166	KOWARSKI SYNDROME	1	1	C1849779
1167	Corneal dystrophy, Groenouw type 1	1	1	C1641846
1168	Vesicoureteric reflux	2	1	C0042580
1169	Retinal degeneration	35	3	C1842127;C0035304
1170	Moebius syndrome	4	1	C0221060
1171	Colorectal cancer, association with	13	2	C0009402
1172	Anterior segment dysgenesis 8	1	1	C4310622
1173	Graves disease, association with	2	1	C0018213
1174	Developmental dysplasia of the hip	3	1	C4551649
1175	Congenital stromal dystrophy	1	1	0
1176	Aspergillosis in stem cell transplant recipients, association with	1	1	0
1177	Hearing loss, unilateral	1	1	C0521785
1178	AVASCULAR NECROSIS OF THE FEMORAL HEAD, PRIMARY, 1	1	1	C0410480
1179	Ehlers-Danlos syndrome due to tenascin-X deficiency	1	1	C1848029
1180	Osteogenesis imperfecta type 15	1	1	0
1181	Cerebral palsy, modifier of	13	11	C0007789
1182	Bilateral occipital pachygyria	1	1	C3279875
1183	Ehlers-Danlos syndrome, kyphoscoliotic type, 1	1	1	C0268342
1184	Reduced circulating factor VII-activating protease activity	1	1	0
1185	Body composition in African American women, association with	1	1	0
1186	Congenital heart disease & Neurodevelopmental disorder	7	1	C0455683;C0152021
1187	Decreased fibrinogen levels	1	1	0
1188	Congenital muscular dystrophy	5	2	C0699743
1189	Short stature, syndromic with arthrogryposis	1	1	C0349588;C0013336
1190	Keratoderma, palmoplantar, punctate	2	1	C1274216
1191	HYPOGONADOTROPIC HYPOGONADISM 20 WITHOUT ANOSMIA	1	1	C4016855
1192	Epistaxis	1	1	C2228238;C4554627;C0014591
1193	Bipolar disorder	111	5	C0005586
1194	Microphthalmia, isolated, 4	1	1	C2751307
1195	Epilepticus of slow-wave sleep	1	1	C1858680
1196	Spondyloperipheral dysplasia	1	1	C0796173
1197	Urofacial syndrome	2	1	C3554520;C0403555
1198	Bethlem myopathy 1	3	3	C1834674
1199	Interstitial lung disease, childhood	4	1	C3161253
1200	Hypofibrinogenaemia	3	3	C0553681;C4016073
1201	LISSENCEPHALY 5	1	1	C3554657
1202	Ductal breast carcinoma	35	1	C1134719
1203	Alzheimer disease, late-onset, association with	12	1	C0494463
1204	Thoracic Aortic Aneurysms and Aortic Dissections	7	1	0
1205	Schizoaffective disorder	28	3	C0036337;C1847650
1206	ADAMTS13 deficiency	1	1	0
1207	Epiphyseal dysplasia of the femoral head	1	1	C3806547
1208	Nail-Patella-like disorder	1	1	C0021885;C0027342;C0444077
1209	Cataract	17	1	C0086543
1210	Icthyosis-hypotrichosis syndrome	1	1	C0020757;C0020758
1211	Renal Tubular Dysgenesis	4	1	C0266313
1212	Parkinson disease, association with	10	1	C1846862;C0030567
1213	Oculomotor apraxia	1	1	C0271270;C0543874;C3489733
1214	Coloboma & microcephaly	1	1	C0009363
1215	Microcornea, myopic chorioretinal atrophy and telecanthus	1	1	C0266544
1216	Reduced MASP2 levels	1	1	0
1217	Short stature	101	16	C0013336;C1849779
1218	Neuronal ceroid lipofuscinosis, late infantile	6	1	C0022340;C0268281
1219	Hypophosphatemic rickets, autosomal dominant	1	1	C0342642
1220	Interstitial pneumonia, idiopathic	1	1	C2350236;C0085786
1221	Brachydactyly, type A2	1	1	C1832702
1222	MATURITY-ONSET DIABETES OF THE YOUNG, TYPE 10	1	1	C3150617
1223	Tall stature, association with	1	1	C0241240
1224	DEAFNESS, AUTOSOMAL RECESSIVE 18B	1	1	C3554163;C3711374
1225	Progressive hyper- and hypopigmentation	1	1	0
1226	Adrenocortical tumour, predisposition to	1	1	C0001618
1227	Congenita IIs, Ichthyosis	1	1	C3536797
1228	Factor VII deficiency, association with	1	1	C4017344;C0015503
1229	Tooth agenesis, selective, 8	1	1	C4310730
1230	Tumoral calcinosis, normal kidney function	1	1	C0263628
1231	Altered function	27	2	0
1232	Ullrich congenital muscular dystrophy 2/Bethlem myopathy 2	1	1	C4225314
1233	Lissencephaly, Recessive	3	1	C0266463
1234	Abnormality of the respiratory system	2	1	C0035238
1235	Kyphoscoliosis	1	1	C0345392;C0024796
1236	Transposition of the great arteries	24	1	C3536741;C0040761
1237	EHLERS-DANLOS SYNDROME, CLASSIC-LIKE, 2	1	1	C1848029
1238	Geleophysic Dysplasia	2	2	C3489726
1239	Alzheimer disease, sporadic late onset, association with	1	1	C0002395;C1521724
1240	Osteogenesis imperfecta 13	1	1	C3553887
1241	Congenital heart defects, multiple types, 6	1	1	C3151221
1242	Osteogenesis imperfecta 17	1	1	C4225301
1243	Deafness, autosomal dominant	2	1	C1832187
1244	Anophthalmia / microphthalmia with developmental delay	1	1	C0003119
1245	Cone-Rod Dystrophy, Recessive	6	2	C0206428;C0393983;C1704638;C0330095
1246	Thrombotic thrombocytopenic purpura congenital	1	1	C0034155;C1268935
1247	Epilepsy and/or neurodevelopmental disorders	45	1	C0014544
1248	Torg syndrome with cardiac malformation	1	1	0
1249	Pituitary hormone deficiency, combined	4	1	C0242343;C3489787
1250	Anxiety-related traits, gender-dependent, association with	1	1	C0003467;C0003469
1251	FICOLIN 3 DEFICIENCY	1	1	C3151226
1252	Thoracic aortic disorder, syndromic	4	3	0
1253	BRACHYDACTYLY, TYPE A1	1	1	C1862151
1254	FIBRINOGEN TOKYO 2	1	1	C4016083
1255	Reduced enzyme activity	38	1	0
1256	Marfan Syndrome/Loeys-Dietz Syndrome/Familial Thoracic Aortic Aneurysms and Dissections	1	1	C0024796
1257	DEAFNESS, AUTOSOMAL RECESSIVE 53	1	1	C1864746
1258	RECLASSIFIED - VARIANT OF UNKNOWN SIGNIFICANCE	67	5	C4015968;C0265970;C1867981
1259	Cleft palate, soft	1	1	C0432098
1260	Marfan/Thoracic aortic aneurysms and dissections	5	3	C0024796
1261	Skeletal dysplasia	29	7	C0029422
1262	Nephrotic syndrome, steroid resistant	52	6	C0403397;C3496337;C1868672
1263	Hereditary spastic paraplegia	24	1	C0037773
1264	DEAFNESS, AUTOSOMAL DOMINANT 13	1	1	C1866095
1265	Intracranial aneurysm, susceptibility, association with	1	1	C0007766
1266	OSTEOGENESIS IMPERFECTA, TYPE II	2	2	C0268358
1267	Thrombotic thrombocytopaenic purpura, pregnancy-onset	1	1	C0034155
1268	Anophthalmia	8	2	C0003119;C1970237
1269	Deafness, autosomal recessive, 18B	1	1	C3554163
1270	Invasive aspergillosis, susceptibility	1	1	C0238013
1271	Cutis laxa, arachnodactyly & vascular abnormalities	1	1	C0268351;C4016894;C3280798
1272	Camurati-Engelmann disease	1	1	C0011989
1273	PI V	1	1	C4015820
1274	DYSPLASMINOGENEMIA	1	1	C1968804
1275	PRELP-related osteosclerosis	1	1	C1418884
1276	Hypotonia, neonatal	5	1	C0343239;C0270971;C2267233
1277	Shprintzen-Goldberg syndrome	4	1	C0024796;C1321551
1278	Dementia, familial	1	1	C1858680;C0751071
1279	Cardiomyopathy	59	2	C0878544;C0349788
1280	Microphthalmia, syndromic, 6	1	1	C1864689
1281	Growth hormone deficiency, isolated, 2	1	1	C0271567
1282	Porencephaly, familial	1	1	C1867983
1283	Osteoporosis	6	3	C0029458;C0029456
1284	Autosomal recessive congenital ichthyosis 1	1	1	C4551630
1285	Lower waist-to-hip ratio, association with	14	3	0
1286	Short stature, non-syndromic	2	1	C0349588;C0013336
1287	OSTEOGENESIS IMPERFECTA, TYPE III	2	2	C0268362;C0268363;C0029456
1288	MARSHALL/STICKLER SYNDROME	1	1	C4015965
1289	Fetal akinesia with cerebral ischemia	1	1	0
1290	Marfan''s syndrome	2	2	C0024796
1291	Reduced fasting insulin C-peptide concentration	1	1	0
1292	Warfarin sensitivity, association with	1	1	C2608079
1293	Abnormality of thrombocytes	19	2	0
1294	Simpson-Golabi-Behmel syndrome	2	1	C0796154
1295	Acid-labile subunit deficiency, partial	1	1	C4321359;C3900122
1296	Otospondylomegaepiphyseal dysplasia	1	1	C4015966;C1855310
1297	Hereditary Sensory and Autonomic Neuropathy, Type V	1	1	C0020075
1298	Predisposition to dissection	2	1	0
1299	Microphthalmia, isolated, with coloboma 6	1	1	C3150968
1300	Systemic lupus erythematosus	17	3	C3862275;C0024141
1301	Toe syndactyly	5	2	C0265660
1302	Antibody deficiency	3	1	C5195444
1303	Amyloidosis, renal	3	1	C0268389;C0268382
1304	Aplastic anaemia / thrombocytopaenia	1	1	C0002874
1305	Deafness, autosomal dominant 12	1	1	C1832187
1306	Factor V and factor VIII deficiency, combined	1	1	C3150889;C1856883
1307	RASopathy	2	1	0
1308	FIBRINOGEN CANTERBURY	1	1	C4016071;C1260903
1309	PRSS1-Related Hereditary Pancreatitis	2	1	C1418965
1310	Hirschsprung disease	98	18	C1619700;C0019569
1311	Combined deficiency of sialidase AND beta galactosidase	1	1	C0268233
1312	Enterokinase deficiency	1	1	C0268416
1313	CORNEAL DYSTROPHY, LATTICE TYPE IIIA	1	1	C0155127;C1837974
1314	OSTEOARTHRITIS WITH MILD CHONDRODYSPLASIA	1	1	C1858079
1315	Macular degeneration, age related, protection against	6	2	C0242383
1316	Hypertensive dilated cardiomyopathy, association with	1	1	C0741945
1317	Microphthalmia and anterior segment dysgenesis	1	1	0
1318	Bone fragility, autosomal recessive	1	1	C3553887
1319	EPIDERMOLYSIS BULLOSA, PRETIBIAL	1	1	C0432321;C0014527
1320	Intellectual disability	630	19	C3150924;C3714756
1321	Afibrinogenaemia	4	3	C0001733;C2584774
1322	Low bone mineral density	1	1	C0029453
1323	Vitreoretinopathy	5	1	C0344290
1324	SHORT STATURE AND ADVANCED BONE AGE, WITH EARLY-ONSET OSTEOARTHRITIS AND OSTEOCHONDRITIS DISSECANS	1	1	C4540540
1325	Ehlers-Danlos syndrome with superior mesenteric artery aneurism	1	1	0
1326	Inflammatory skin and bowel disease, neonatal 1	1	1	C3280501
1327	Ehlers-Danlos syndrome/Osteogenesis imperfecta	1	1	C0023931
1328	Deafness with labyrinthine aplasia, microtia and microdontia	1	1	C1853144
1329	Neuropathy	19	3	C0442874
1330	Spastic paraplegia and ataxia	1	1	0
1331	Megacolon	1	1	C0025160
1332	Total anomalous pulmonary venous connection, susceptibility to	7	1	C4551903
1333	Rheumatoid arthritis, susceptibility, association	5	1	C1833448
1334	Epileptic encephalopathy with infantile spasms	15	1	0
1335	Hyperostosis-hyperphosphatemia syndrome	2	1	C1853256
1336	Thyroid peroxidase deficiency	1	1	C1291299
1337	Clinical features observed in this individual	8	2	0
1338	Amyotrophic lateral sclerosis	161	4	C0002736;C3152097;C3151403
1339	Hyperekplexia	5	1	C3553288;C0234166
1340	Severe respiratory distress syndrome, in preterm infancy	2	1	0
1341	Interhemispheric fusion, single nostril nose	1	1	0
1342	CAMPTODACTYLY-ARTHROPATHY-COXA VARA-PERICARDITIS SYNDROME	1	1	C1859690
1343	Renal Hypomagnesemia, Recessive	2	1	0
1344	Poretti Boltshauser syndrome with retinal vasculopathy	1	1	0
1345	Nonsyndromic Hearing Loss, Recessive	27	1	C3711374
1346	Myoclonus dystonia	5	1	C1834570
1347	Lens luxation and striae	1	1	0
1348	Selective tooth agenesis, syndromic	1	1	C1970308;C4082304
1349	PI M1-VAL213	1	1	C4015797
1350	Blood pressure, association with	5	1	C1271104
1351	Neuronal ceroid lipofuscinosis	14	1	C2673257;C0027877;C4017260
1352	Cardiomyopathy, dilated 1JJ	1	1	C3808935
1353	HYPOTONIA, HYPERVENTILATION, IMPAIRED INTELLECTUAL DEVELOPMENT, DYSAUTONOMIA, EPILEPSY, AND EYE ABNORMALITIES	1	1	C0026827
1354	Von Willebrand disease 2u	1	1	0
1355	Osteogenesis imperfecta 3	2	2	C0268362
1356	Microscopic haematuria with renal failure and kidney cysts	1	1	0
1357	Maturity-onset diabetes of the young 10	1	1	C3150617
1358	Familial Candidiasis, Dominant	1	1	0
1359	Transient bullous dermolysis of the newborn	1	1	C1851573
1360	Renal function in diabetes, association with	1	1	0
1361	Marfan syndrome with aortic dissection and regurgitation	1	1	0
1362	Diabetes insipidus	1	1	C0011848
1363	FIBRINOGEN NAGOYA 1	1	1	C4016090
1364	Bifid nose, renal agenesis & anorectal malformations syndrome	1	1	C2750433
1365	Ceroid lipofuscinosis, neuronal, 13	1	1	C3715049
1366	Osteogenesis imperfecta, type VI	1	1	C3279564;C0029434
1367	Autism, reduced risk, association with	1	1	C0004352
1368	Dolichostenomelia	2	1	C0003706
1369	MULTIPLE SYNOSTOSES SYNDROME 4	1	1	C4693531
1370	Ehlers-Danlos syndrome, classic-like	1	1	C1848029
1371	Osteochondritis dissecans, dominant familial	1	1	C0029421
1372	Cataract, autosomal recessive	18	1	C1857853
1373	CHARGE syndrome	4	1	C3552553;C0265354;C3552136
1374	Congenital disorder of deglycosylation	1	1	C3808991
1375	Osteoarthritis	3	1	C0029408
1376	Crohn disease, association with	2	1	C1970129
1377	DENTINOGENESIS IMPERFECTA, SHIELDS TYPE II	1	1	C2973527
1378	THROMBOPHILIA DUE TO HISTIDINE-RICH GLYCOPROTEIN DEFICIENCY	1	1	C2751090
1379	Ectodermal derivative impairment	1	1	0
1380	Autosomal dominant epilepsy with auditory features	1	1	C1838062
1381	EFEMP2-Related Cutis Laxa	2	1	C1414298
1382	Stickler syndrome	7	7	C1836080;C0265253
1383	Haim-Munk Syndrome	1	1	C1855627;C0030360
1384	Candida colonisation in hematopoietic stem cell transplantees	1	1	C3279774;C0341024
1385	Kniest dysplasia	1	1	C0265279;C0026691
1386	Osteogenesis imperfecta, autosomal dominant	1	1	C0029434
1387	Epilepsy and autism spectrum disorder	12	1	0
1388	Diabetes, type 1	8	1	C0011854;C1852092
1389	Basal ganglia calcification, idiopathic	3	1	C3554321
1390	Von Willebrand disease 3	1	1	C1264041
1391	Malaria, susceptibility, association with	1	1	C1970028
1392	Neonatal Diabetes Mellitus	3	2	C0158981
1393	Osteogenesis imperfecta III/IV	2	2	C0268362;C0268363
1394	Venous thrombosis, increased risk, association	1	1	C0042487
1395	MARFAN SYNDROME, CLASSIC	1	1	C0024796;C4016057
1396	Epidermolysis bullosa, junctional, Herlitz type	1	1	C0079683
1397	Premature ovarian failure	28	5	C0025322;C1845295
1398	Cutaneous melanoma, susceptibility to, association with	1	1	C0025202;C0151779
1399	Plasminogen deficiency	1	1	C0398621;C1968804
1400	Congenital disorder of glycosylation	36	1	C3281084;C0282577
1401	Facial dysmorphism, scalp hypotrichosis & hypodontia	1	1	C0266617;C0424503
1402	Hydranencephaly & diaphragmatic hernia	1	1	C0020225
1403	Atopic dermatitis, association with	3	1	C0011615
1404	Progressive hearing loss	4	1	C1842138;C1832425
1405	Anterior segment developmental anomaly	4	1	0
1406	Lymphoedema-cholestasis syndrome	1	1	C0268314
1407	GALACTOSIALIDOSIS	1	1	C0268233
1408	Crisponi/Cold-induced sweating syndrome	1	1	0
1409	Pancreatitis	7	1	C0010674;C0030305
1410	LOEYS-DIETZ SYNDROME 4	1	1	C3553762
1411	Arterial dissection	3	1	C0002949
1412	Steel syndrome	1	1	C3554594
1413	STICKLER SYNDROME, TYPE IV	1	1	C3279941
1414	Deafness, congenital, severe	8	1	C0339789
1415	Primary amenorrhea, association with	1	1	C0232939
1416	Overfolding of the superior helices	1	1	C1865304
1417	MYOCLONIC EPILEPSY OF UNVERRICHT AND LUNDBORG	1	1	C0751785;C0751778
1418	MASS Syndrome	1	1	C1858556
1419	autosomal recessive deafness 18B	1	1	C3554163
1420	Merosin deficient congenital muscular dystrophy	1	1	C1263858
1421	Reduced factor IX activity	1	1	C4023159
1422	Aortic dissection, Stanford type A	1	1	C0340643
1423	Diaphanospondylodysostosis	1	1	C1842691
1424	CARASAL	1	1	0
1425	Megalocornea 1, X-linked	1	1	C0344530
1426	Ehlers-Danlos syndrome/Osteogenesis imperfecta, modifier of	1	1	C4518787
1427	SHORT STATURE AND ADVANCED BONE AGE	1	1	C4540541
1428	Spondyloepimetaphyseal dysplasia Missouri type	1	1	C1865832
1429	Intrauterine stroke & anterior segment dysgenesis	1	1	0
1430	Breast carcinoma	29	3	C0678222;C0238033
1431	Tricuspid aortic valve stenosis	1	1	0
1432	Factor XII deficiency	1	1	C0015526;C4017222
1433	Weill-Marchesani syndrome with thoracic aortic disease	1	1	0
1434	Unverricht-Lundborg disease	1	1	C0751785
1435	Amyloidosis, Ostertag-type	1	1	C0268389
1436	Selective Tooth Agenesis	2	1	C4082304
1437	Hennekam syndrome	3	2	C0795972
1438	Cerebrovascular fibromuscular dysplasia, risk factor	1	1	0
1439	Pseudorheumatoid dysplasia and spondyloepiphyseal dysplasia, Stanescu type	1	1	0
1440	Phaeochromocytoma	14	1	C0031511;C1861848;C0238198
1441	METACARPAL 4-5 FUSION	1	1	C1839728
1442	Collagenopathy, type II	1	1	0
1443	Cerebellar dysplasia with cysts	1	1	0
1444	Corneal dystrophy, granular type I	1	1	C1641846
1445	46,XY sex reversal 7	1	1	C1856273
1446	Brain arteriovenous malformation	20	2	C0917804
1447	Infant colitis	1	1	0
1448	Intraocular pressure, association with	8	1	C0578862
1449	CARASIL	1	1	C1838577;C0270612
1450	Severe dysplasia	1	1	C0334048
1451	Developmental and epileptic encephalopathy	35	1	0
1452	EHLERS-DANLOS SYNDROME, ARTHROCHALASIA TYPE, 1	1	1	C0268345
1453	Humerofemoral hypoplasia with radiotibial ray deficiency	1	1	C4747940
1454	Amyloidangiopathy	1	1	C1527338
1455	Intellectual disability, seizures, hypotonia, abnormal facial shape & short stature	1	1	C3714756
1456	Haemophilia A, inhibitor development, protection against	7	1	C0019069
1457	Ovarian dysgenesis 2	1	1	C1845294;C1845295
1458	Metaphyseal anadysplasia 1	1	1	C1865832
1459	Corneal dystrophy, Avellino type	1	1	C1275685
1460	Thoracic aortic aneurysm and aortic dissection	4	1	0
1461	Decreased apoptosis and increased colony formation in vitro	1	1	0
1462	Congenital heart defects	18	2	C1842778;C0039685;C0018798
1463	Nonsyndromic aggressive periodontitis	1	1	0
1464	Spinocerebellar ataxia 35	1	1	C3888031;C0087012
1465	Dysspondyloenchondromatosis / spondyloepimetaphyseal dysplasia, Strudwick type	1	1	C4302548
1466	Deafness, autosomal recessive 21	1	1	C0011053;C0018772
1467	Camptodactyly, absent carpal bones, and hemangioma	1	1	C0685409
1468	Hypophosphataemia	4	1	C0085682
1469	MUCOPOLYSACCHARIDOSIS, TYPE IX	1	1	C1291490
1470	Porencephaly, prenatal	1	1	C0302892;C0151860;C4082173
1471	PLASMINOGEN DEFICIENCY, TYPE I	1	1	C1968804
1472	OSTEOGENESIS IMPERFECTA, TYPE X	1	1	C3151211;C0029434
1473	Infantile spasms	29	2	C1839333;C0037769
1474	Ventricular septal defect	20	1	C0018818;C3280785
1475	HIRSCHSPRUNG DISEASE, SUSCEPTIBILITY TO, 3	1	1	C0019569;C3150974
1476	OTOSPONDYLOMEGAEPIPHYSEAL DYSPLASIA, AUTOSOMAL DOMINANT	1	1	C1848488
1477	OVARIAN DYSGENESIS 2	1	1	C0025322;C1845294
1478	VON WILLEBRAND DISEASE, TYPE 2CB	1	1	C4017298;C1264040
1479	Hypolipidaemia, combined	1	1	C0342892
1480	BRUCK SYNDROME 2	1	1	C1836602;C0432253
1481	Aortic dilatation	3	2	C0265004
1482	Hypotonia & joint hyperlaxity	1	1	C0026827
1483	Stiff skin syndrome with ectopia lentis	1	1	C1861456
1484	Ehlers-Danlos syndrome IV	2	1	C0268338
1485	Noonan syndrome	23	1	C0028326;C0349639
1486	Early teeth loss with Wagner syndrome	1	1	0
1487	Alport syndrome 2, autosomal recessive	1	1	C4746745
1488	Microphthalmia Cataract, Sclerocornea	3	2	0
1489	Axenfeld-Rieger anomaly, scoliosis	4	1	C0266548
1490	SPONDYLOPERIPHERAL DYSPLASIA	1	1	C0796173
1491	Marfan syndrome, atypical	1	1	C0024796;C4016055
1492	Bethlem myopathy 2	1	1	C4225313
1493	EPIDERMOLYSIS BULLOSA DYSTROPHICA INVERSA, AUTOSOMAL RECESSIVE	1	1	C2673612;C0079474
1494	Cathepsin D deficiency	1	1	C1864669
1495	WEILL-MARCHESANI SYNDROME 4	1	1	C2750787
1496	OOCYTE MATURATION DEFECT 3	1	1	C4540205
1497	Haemophilia A, inhibitor development, increased risk	9	1	C0019069
1498	Early-onset joint hypermobility, joint contractures, muscle weakness, bone dysplasia and high myopia	1	1	C1279919
1499	Increased serum MBL level	1	1	0
1500	Intellectual disability, hypotonia and seizures	1	1	C3714756
1501	Intellectual disability/developmental delay	60	1	C3714756
1502	3MC syndrome	3	3	C0796279
1503	Bile-duct dilatation	20	3	C0400751
1504	Intracranial aneurysm, familial	1	1	C0007766
1505	CTSC-Related Disorders	1	1	C1413811
1506	Epilepsy	98	2	C1845343;C0014544;C0012634
1507	Severe RSV infection, association with	1	1	0
1508	Platelet aggregation	1	1	C0920267;C0677599;C0032176
1509	Cleft lip and palate, with enamel defects	1	1	C0158646
1510	SPLIT-HAND/FOOT MALFORMATION 6	1	1	C2749665;C2699510
1511	ICHTHYOSIS, CONGENITAL, AUTOSOMAL RECESSIVE 1	1	1	C0079154;C0020758
1512	Microphthalmia sclerocornea, psychomotor delay	3	2	0
1513	SPONDYLOEPIMETAPHYSEAL DYSPLASIA, AGGRECAN TYPE	1	1	C2748544
1514	Hyperpigmentation with or without hypopigmentation, familial progressive	1	1	C1840392
1515	Split hand/foot malformation	4	1	C2749665;C2699510
1516	Ligneous conjunctivitis	1	1	C1274789
1517	Cutis laxa, autosomal recessive, 1A	1	1	C3665335
1518	Congenital Stromal Corneal Dystrophy	1	1	C1864738
1519	Antithrombin III deficiency	1	1	C0272375
1520	GELEOPHYSIC DYSPLASIA 1	1	1	C3278147
1521	Dentinogenesis imperfecta, non syndromic	2	2	C0011436
1522	Cornea plana	1	1	C0344529
1523	Mental retardation, X-linked, 3	1	1	C0025362;C3714756
1524	Diabetes, MODY	31	2	C3150618
1525	Skin anomalies, delayed wound healing, night blindness, connective tissue abnormalities and hypothyroidism	1	1	C0037268
1526	Von Willebrand disease 2	1	1	C1264040
1527	Candidiasis, familial, 6	1	1	C3151405
1528	Protruding tongue	1	1	C0241442
1529	Haematocrit and haemoglobin levels, association with	1	1	0
1530	Marfan syndrome	1	1	C0024796
1531	Geleophysic / acromicric dysplasia	1	1	C3280054;C0265287
1532	Non-inhibitory variant	1	1	C1513853;C1518422
1533	Antithrombin-III Deficiency	1	1	C0272375
1534	Mitral regurgitation	2	1	C0026266
1535	Parkinson disease	59	2	C0030567;C1846862
1536	STICKLER SYNDROME, TYPE I, NONSYNDROMIC OCULAR	1	1	C1836080;C0265253
1537	Septo-optic dysplasia / Moebius syndrome	1	1	C0338503
1538	Prothrombin deficiency	1	1	C4016343;C0020640
1539	Partial congenital absence of teeth	3	1	C0020608;C4083050
1540	Chronic kidney disease	4	1	C1561643
1541	Poretti-Boltshauser syndrome	1	1	C4014821
1542	LTBP2-related disorder	1	1	C1334351;C0292186
1543	Spondyloepiphyseal dysplasia, Stanescu type	1	1	C4225273
1544	Robinow Syndrome	2	1	C0265205
1545	PROTHROMBIN TYPE 3	1	1	C3890031;C0020640
1546	Pituitary stalk interruption syndrome	59	7	C4053775
1547	PASH syndrome	2	1	C5191642
1548	HYPOBETALIPOPROTEINEMIA, FAMILIAL, 2	1	1	C1857970
1549	McArdle disease, modifier of, association with	1	1	C0017924
1550	Keipert syndrome	1	1	C1850627
1551	Weill-Marchesani syndrome 3	1	1	C3553785;C0265313
1552	Multiple sclerosis, susceptibility, association with	2	1	C1868685
1553	EPIDERMOLYSIS BULLOSA PRURIGINOSA, AUTOSOMAL RECESSIVE	1	1	C1853063;C0014527
1554	Subacute cutaneous lupus erythematosus, association with	1	1	C0024140
1555	Spondyloepiphyseal dysplasia / COL2A1-related dysplasia	1	1	C0038015;C2745959
1556	Porencephaly, bilateral	1	1	C0302892;C0151860;C4082173
1557	MARFAN SYNDROME, SEVERE CLASSIC	1	1	C4016052;C0024796
1558	Cerebellar ataxia	85	3	C0007758
1559	Mesial temporal lobe epilepsy with hippocampal sclerosis	19	3	C4749367
1560	Cutis laxa syndrome	1	1	C0268351;C4016894;C3280798
1561	Rokitansky-Kuster-Hauser syndrome	1	1	C2675014;C1698581
1562	Multiple synostoses syndrome 3	1	1	C2751826
1563	Microphthalmia, isolated, with coloboma, 6	1	1	C3150968
1564	Gonadal dysgenesis, complete	1	1	C4016928;C1856273
1565	Ehlers-Danlos syndrome, vascular-type	1	1	C0268338
1566	EPIDERMOLYSIS BULLOSA, JUNCTIONAL, NON-HERLITZ TYPE	4	3	C2608084;C0268374;C0014527
1567	Previous child died at the age of 6 months with respiratory distress, vomiting after feeding, hypoglycemia, excessive crying, and neonatal jaundice.	1	1	0
1568	Macroscopic haematuria with microhaematuria	1	1	0
1569	Silver-Russell syndrome	4	1	C0175693
1570	Decreased peripheral vision & night blindness	1	1	C0235096
1571	Rickets, hypophosphataemic	6	1	C3536984;C1704375
1572	Diverticulitis	1	1	C0012813
1573	Non-syndromic orofacial cleft 11	1	1	C2677434;C1833563
1574	Cyclical neutropenia	1	1	C0221023
1575	IgA levels in smokers, association with	1	1	0
1576	Ullrich congenital muscular dystrophy 2	1	1	C4225314
1577	Chronic obstructive pulmonary disease, association with	6	3	C0024117
1578	Weill-Marchesani-like syndrome	1	1	C2750787
1579	Stiff skin syndrome	1	1	C1861456
1580	Low serum adiponectin level, association with	1	1	0
1581	Peeling skin syndrome	1	1	C1849193
1582	Tuberculosis, susceptibility to, association with	3	1	C0429908
1583	Osteogenesis imperfecta 4	2	2	C0268363
1584	DENTIN DYSPLASIA, TYPE II	1	1	C0399380
1585	Diabetic nephropathy, association with	4	1	C0011881
1586	Thoracic aortic aneurysm with aortic regurgitation	1	1	0
1587	Solid pseudopapillary tumours	1	1	C0334357
1588	Metastatic and early-onset disease, in prostate cancer	6	1	0
1589	Noncompaction, left ventricular	73	4	C1960469
1590	Oocyte morphologic abnormality	2	2	0
1591	Hypoadiponectinaemia	1	1	0
1592	Familial colorectal cancer, type X, increased risk	1	1	C3896578
1593	Age at menarche, association with	5	1	C1314691
1594	Perinatal respiratory disease, association with	1	1	0
1595	Familial Thrombotic Thrombocytopenia Purpura	1	1	C1956258
1596	Conotruncal heart defects with extracardiac anomalies	58	9	0
1597	SPONDYLOEPIPHYSEAL DYSPLASIA, KIMBERLEY TYPE	1	1	C1842149
1598	Corticosteroid-binding globulin deficiency	1	1	C1852529
1599	Atrioventricular septal defect in Down syndrome	1	1	0
1600	Bethlem-like myopathy	1	1	0
1601	HIV infection, susceptibility to, association	2	1	C3152134;C1832288;C4016733
1602	Brain calcification	1	1	C0270685
1603	Arthrogryposis multiplex congenita, neurogenic, with myelin defect	1	1	C4479539
1604	FIBRINOGEN HILLSBOROUGH	1	1	C4016098
1605	Factor VII Marburg I Variant Thrombophilia	1	1	0
1606	Congenital sensory neuropathy with selective loss of small myelinated fibers	1	1	C0020075
1607	Exophthalmos	1	1	C0015300
1608	Poretti-boltshauser syndrome	1	1	C4014821
1609	Early onset severe obesity	1	1	C4013980
1610	SPONDYLOEPIPHYSEAL DYSPLASIA TARDA WITH PROGRESSIVE ARTHROPATHY	1	1	C0432215
1611	Bethlem myopathy/Ullrich congenital muscular dystrophy	1	1	C1834674
1612	PEELING SKIN SYNDROME 5	1	1	C4310710
1613	Macular dystrophy	21	4	C1842914;C0242383
1614	Diabetes mellitus, permanent neonatal	4	1	C1833104
1615	Basal cell carcinoma, increased risk, association with	1	1	C0007117;C4721806;C1547219;C2984322;C3811653;C3540686
1616	Schwartz-Jampel Syndrome	1	1	C0036391
1617	Hypertelorism & high myopia	1	1	C0020534
1618	Night blindness, congenital stationary, 1A	1	1	C0028077
1619	Split-hand/foot malformation 6	1	1	C2749665
1620	Joint hypermobility	2	1	C1844820;C0086437
1621	Lung cancer, susceptibility to, association with	47	6	C2674950
1622	Misalignment of teeth	24	1	C1852504
1623	Vitreoretinopathy with phalangeal epiphyseal dysplasia	1	1	C1852989
1624	EHLERS-DANLOS SYNDROME, ARTHROCHALASIA TYPE, 2	1	1	C0268345
1625	Reduced bone mineral density	1	1	C2674432
1626	Hereditary factor IX deficiency disease	1	1	C0008533
1627	Mannose-Binding Lectin Deficiency	1	1	C3280586
1628	CHONDRODYSPLASIA, GREBE TYPE	1	1	C0265260
1629	Weill-Marchesani-Like Syndrome	1	1	C2750787
1630	Diaphragmatic hernia	9	2	C0019284;C0235833;C3489393
1631	Increased protein cleavage by ADAMTS13	1	1	0
1632	Primary ovarian insufficiency, modifier of	1	1	C0025322;C0085215;C0041408
1633	Hemiparesis, right side & epilepsy	1	1	C0457435
1634	Antitrypsin M2 variant	1	1	C4015798
1635	Congenital myasthenic syndrome, presynaptic	2	1	C0751882
1636	Microtia	14	5	C2676772;C0152423
1637	Anophthalmia-microphthalmia syndrome	2	1	C0003119
1638	Developmental delay, multifocal epilepsy & abnormal liver function	1	1	C0424605;C0557874
1639	Disproportionate short-limb short stature	1	1	C1849937
1640	Angiopathy, nephropathy, aneurysms & muscle cramps	1	1	C2673195
1641	PERIODONTITIS, AGGRESSIVE, 1	1	1	C0031106
1642	Porencephaly	2	2	C0151860
1643	RIGHT ATRIAL ISOMERISM	1	1	C3178806
1644	Adenomatous polyposis coli	18	1	C0032580
1645	LEBER CONGENITAL AMAUROSIS 17	1	1	C3715164
1646	Helicobacter pylori-related gastric carcinoma, association with	1	1	C0079488
1647	Micrognathia	4	2	C0025990
1648	PSEUDOACHONDROPLASIA, SEVERE	1	1	C0410538;C4310948
1649	Hearing impairment, nonsyndromic	10	1	C3711374
1650	Muscle weakness, contractures in the shoulders, hips & feet, cavus feet and lordosis	1	1	C0151786;C0030552
1651	EHLERS-DANLOS SYNDROME, CLASSIC TYPE, 2	1	1	C4225429
1652	Antiplasmin alpha 2 deficiency	1	1	C2752081;C3489734
1653	OI type III	2	2	C0268362
1654	Intrauterine HIV-1 infection, increased risk	1	1	0
1655	HCV infection, susceptibility to	1	1	C4288963
1656	Bone mass, association with	1	1	C0177804;C0005938
1657	KEIPERT SYNDROME	1	1	C1850627
1658	Amelogenesis imperfecta, autosomal dominant	2	1	C0002452
1659	Acinar dysplasia	7	2	C3872820
1660	VATER/VACTERL association, without limb anomalies	1	1	C4225671
1661	Raine syndrome	1	1	C1850106
1662	Exfoliative ichthyosis	1	1	C1838440
1663	46,XY GONADAL DYSGENESIS, COMPLETE, DHH-RELATED	1	1	C4016928;C1856273
1664	Arthrogryposis multiplex congenita	5	1	C0003886
1665	Increased post-stroke mortality, association with	1	1	C1858965
1666	Endometriosis, protection against, association with	1	1	C0014175
1667	Intracerebral haemorrhage, foetal, with cataract	1	1	C2937358
1668	Rolandic epilepsy, bilateral perisylvian polymicrogyria	1	1	C1845668;C1845070
1669	Facial asymmetry	2	1	C1306710;C0546952
1670	Increased hepatocyte growth factor levels, association with	1	1	0
1671	Bethlem myopathy 1	3	3	C1834674
1672	Rhegmatogenous retinal detachment	1	1	C1836081;C0271055
1673	Basal cell carcinoma, reduced risk, association with	4	1	C4721806;C0007117
1674	Ectopia lentis & varicose great saphenous vein	1	1	C0013581
1675	Reduced glucuronidated steroid levels	1	1	0
1676	Bronchopulmonary dysplasia, in preterm newborns	4	1	C0006287
1677	Crisponi/Cold-induced sweating syndrome 1	1	1	C1832409
1678	CEROID LIPOFUSCINOSIS, NEURONAL, 13	1	1	C0027877
1679	Chronic itch, neuropathic	1	1	0
1680	Cryptorchidism	2	1	C0010417;C0010418
1681	Pancreatitis, hereditary	3	1	C0238339
1682	Epidermolysis bullosa, junctional, late-onset	1	1	C4304724
1683	Epidermolysis bullosa, junctional non-Herlitz	2	2	C0014527
1684	Interleukin 1 Receptor Antagonist Deficiency	1	1	C2748507
1685	Bicuspid aortic valve, thoracic aortic root & ascending aorta dilatation	4	2	C0149630
1686	Prothrombin-Related Thrombophilia	1	1	C0033706;C0200396
1687	SPONDYLOEPIMETAPHYSEAL DYSPLASIA, X-LINKED	1	1	C1848097
1688	Basal ganglia calcification, idiopathic, 5	1	1	C3809645
1689	Corneal dystrophy, posterior polymorphous, 2	1	1	C1852795
1690	Otospondylomegaepiphyseal dysplasia, autosomal recessive	1	1	C4520892
1691	Thrombophilia, severe	2	1	C0398623
1692	Supravalvular Aortic Stenosis	1	1	C0003499
1693	Intracranial aneurysm	8	2	C0007766
1694	FRASER SYNDROME 1	1	1	C4551480
1695	Glaucoma, primary congenital	8	4	C0339573;C0344559;C1533041
1696	SPONDYLOMETAPHYSEAL DYSPLASIA, CORNER FRACTURE TYPE	1	1	C0432221
1697	Increased adult height, association with	29	1	0
1698	Large artery stroke, increased risk	1	1	0
1699	Antithrombin III deficiency	1	1	C0272375
1700	Colorectal cancer	190	8	C0009402;C1837315
1701	EPIPHYSEAL DYSPLASIA, MULTIPLE, 5	1	1	C1846843;C0026760
1702	Extracellular matrix-related myopathy	1	1	C0015350
1703	Congenital Ichthyosis	7	1	C0079583;C0079154;C0020758
1704	Developmental delay, agenesis of the corpus callosum, facial abnormalities and macrocephaly	1	1	C0424605;C0557874
1705	Muscular dystrophy & congenital myopathy	8	1	C0026850
1706	Atopic dermatitis, reduced risk, association with	1	1	C0013595;C0011615
1707	Retinal dystrophy	102	5	C3151086;C0854723
1708	Cornea plana, with primary angle-closure glaucoma	1	1	C0344529
1709	OBESITY, ASSOCIATION WITH	1	1	C4016383
1710	Absence seizures	1	1	C0014553
1711	Von Willebrand disease 2a/2c	1	1	0
1712	Thoracic aortic aneurysms & dissections, association with	1	1	C0162872
1713	Ectopia Lentis, Isolated, Autosomal Recessive	1	1	C0013581
1714	Abnormality of the large intestine	18	3	C4025715
1715	Schizophrenia, association with	34	5	C2675945;C0036341
1716	FIBRINOGEN CHRISTCHURCH 2	1	1	C4016074
1717	Orbicularis oris defect	1	1	C2677434
1718	Ehlers-Danlos syndrome, vascular type	1	1	C0268338
1719	Primary open angle glaucoma	2	1	C0339573
1720	Oocyte maturation defect 3	1	1	C4540205
1721	MASP2 Deficiency	1	1	C3151085
1722	Ehlers-Danlos syndrome III	1	1	C0268337
1723	Klippel-Feil Syndrome	1	1	C1861689;C2751307;C0022738
1724	Cryptorchidism	8	1	C0010417;C0010418
1725	Laryngo-onycho-cutaneous syndrome	1	1	C1328355
1726	Abdominal aortic aneurysm	8	3	C0162871
1727	Diaphanospondylodysostosis, attenuated	1	1	C1842691
1728	Myopathy, areflexia, respiratory distress, and dysphagia, early-onset	1	1	C3280679
1729	ROLANDIC EPILEPSY, MENTAL RETARDATION, AND SPEECH DYSPRAXIA, X-LINKED	1	1	C4016493
1730	Urban-Rifkin-Davis syndrome	1	1	C2750804
1731	Aortic enlargement	1	1	0
1732	Afibrinogenemia, congenital	2	2	C2584774
1733	Achondrogenesis	3	1	C0001079
1734	Rhegmatogenous retinal detachment autosomal dominant	1	1	C1836080;C1836081;C0265253
1735	Spondyloepimetaphyseal dysplasia MATN3-related	1	1	C0038015;C4016771
1736	Ischiospinal dysostosis	1	1	0
1737	Hypochondroplasia	3	1	C0410529
1738	semilobar holoprosencephaly	1	1	C0751617
1739	Metaphyseal Anadysplasia	2	2	C0432226;C2748495
1740	SIMPSON-GOLABI-BEHMEL SYNDROME, TYPE 1	1	1	C0796154
1741	LYMPHATIC MALFORMATION 4	1	1	C4747769
1742	GLOMERULOPATHY WITH FIBRONECTIN DEPOSITS 2	1	1	C1866075
1743	Loeys-Dietz syndrome 5	1	1	C3810012
1744	Pseudoachondroplasia	2	2	C4310949;C0410538
1745	LYSYL OXIDASE POLYMORPHISM	1	1	C4016254
1746	Achondrogenesis, type II	1	1	C0220685
1747	Neurological disorder	27	3	C0027765
1748	Cerebellar cysts, white matter lesions & cortical dysgenesis	1	1	C1847762
1749	Osteogenesis imperfecta 15	1	1	C3808844
1750	Persistent M√ºllerian duct syndrome	2	1	0
1751	Non-syndromic hearing loss, autosomal recessive	1	1	C1864746
1752	Transient bullous dermolysis	1	1	C1851573
1753	Epidermolysis bullosa, junctional, localised	1	1	C0474889
1754	Pulmonary airway malformation	19	1	0
1755	Disorder of sexual development	5	1	C2751317;C0036875
1756	Pulmonary alveolar proteinosis	6	2	C0034050;C2677877
1757	Spondyloepiphyseal dysplasia, congenital type	1	1	C2745959
1758	MICROPHTHALMIA AND LIMB ANOMALIES	1	1	C0599973
1759	Mucopolysaccharidosis, Type IX	1	1	C1291490
1760	Odontoonychodermal dysplasia	1	1	C0796093;C0013575
1761	Myasthenic syndrome, congenital, 5	1	1	C1864233
1762	Ehlers-Danlos syndrome with vascular events	1	1	0
1763	Premature ovarian failure 4	1	1	C1845295
1764	Sudden death in the young	4	1	0
1765	HYPERPIGMENTATION WITH OR WITHOUT HYPOPIGMENTATION, FAMILIAL PROGRESSIVE	1	1	C1840392
1766	Von Willebrand disease 2a/2b	1	1	0
1767	Double outlet right ventricle	2	1	C0013069;C1857586;C0018798
1768	DYSPROTHROMBINEMIA PROTHROMBIN HIMI-II	1	1	C4016343;C0020640
1769	Macular degeneration, age-related, 11	1	1	C2677774
1770	Hypogonadotropic hypogonadism	62	13	C3502054;C2676243;C0022735
1771	Periventricular nodular heterotopia	5	1	C1868720
1772	Leukaemia, risk , association with	2	1	C0023418
1773	Congenital muscular dystrophy due to partial LAMA2 deficiency	1	1	C1842898
1774	Von Willebrand disease 2n	1	1	C1282975
1775	Syndromic Microphthalmia, Dominant	1	1	0
1776	Alpha-1-antitrypsin deficiency	1	1	C0221757
1777	Glaucoma, primary open angle/pseudoexfoliation syndrome	1	1	C0339573
1778	Higher plasma triglyceride level	2	2	C4014554
1779	Microscopic hematuria	1	1	C0239937
1780	HEMORRHAGE, INTRACEREBRAL, SUSCEPTIBILITY TO	1	1	C3281105
1781	Sensorineural deafness	2	1	C0018784
1782	Osteogenesis imperfecta I	3	3	C2674706;C0023931
1783	Spondylarthopathy	1	1	0
1784	Myopathy with core targetoid defects	1	1	0
1785	Multiple synostosis syndrome	1	1	C0175700
1786	Type II Collagenopathies	1	1	0
1787	BRAIN SMALL VESSEL DISEASE 2	1	1	C3280970
1788	Stickler syndrome, autosomal recessive	1	1	C3279941
1789	Muscular dystrophy, merosin deficient, congenital 1A	1	1	C1263858
1790	Acrogeria, Gottron	2	1	C0268338
1791	ECTODERMAL DYSPLASIA 14, HAIR/TOOTH TYPE WITHOUT HYPOHIDROSIS	1	1	C4749124
1792	Cardiomyopathy, arrhythmogenic right ventricular	9	1	C1843896;C0349788
1793	Hydronephrosis	4	1	C0020295
1794	Psychomotor delay, epilepsy, left side hemiparesis & esotropia	1	1	C0557874;C0424230
1795	ECTODERMAL DYSPLASIA 15, HYPOHIDROTIC/HAIR TYPE	1	1	C5193189
1796	Combined Deficiency of Factor V and Factor VIII	2	1	C1856883
1797	Bruck syndrome	2	1	C0432253
1798	Neonatal short limb dysplasia	1	1	0
1799	Developmental disorder	795	42	C0008073
1800	Moyamoya disease, association with	11	1	C0026654
1801	Acromesomelic chondrodysplasia, Grebe type	1	1	C0265260
1802	Kyphomelic dysplasia	1	1	C0432239
1803	Fibrochondrogenesis 1	1	1	C3278138
1804	Increased factor XIII specific activity	1	1	0
1805	Ullrich congenital muscular dystrophy, intermediate	3	3	C4551860
1806	High palate	5	2	C0240635
1807	Dentinogenesis imperfecta, Shields type 2	1	1	C2973527
1808	ANGIOEDEMA, HEREDITARY, TYPE I, AUTOSOMAL RECESSIVE	1	1	C0019243
1809	Ehlers-Danlos syndrome II	2	2	C0268336
1810	Reduced alpha-1-antitrypsin concentration	1	1	0
1811	Peripheral dystrophy	1	1	0
1812	Scoliosis, severe	1	1	C2674596
1813	Corneal ectasia, primary	1	1	C0155135
1814	MICROPHTHALMIA, ISOLATED 7	1	1	C3150969
1815	Dental anomalies & short stature	1	1	C1832594
1816	Neutropenia, severe congenital 1, autosomal dominant	1	1	C1859966
1817	osteogenesis imperfecta	2	2	C0029434;C3151218
1818	CRISPONI/COLD-INDUCED SWEATING SYNDROME 1	1	1	C1848947
1819	Systemic sclerosis, protection against, association with	1	1	C0036421
1820	Contractural arachnodactyly with seizures	1	1	0
1821	Foetal hyperthyroidism	1	1	0
1822	DIARRHEA 9	1	1	C4748517
1823	Congenital Afibrinogenemia	3	3	C2584774
1824	Late-onset retinal degeneration	1	1	C1854065
1825	OSTEOGENESIS IMPERFECTA, TYPE XV	1	1	C0029434
1826	NIGHT BLINDNESS, CONGENITAL STATIONARY, TYPE 1A	1	1	C3495587
1827	Von Willebrand disease 2m	1	1	C1282974
1828	Osteogenesis imperfecta, type X	1	1	C3151211;C0029434
1829	Lipid proteinosis	1	1	C0023795;C0264511
1830	Autism, association with	8	1	C0004352
1831	DEAFNESS, AUTOSOMAL DOMINANT 69	1	1	C0011053;C0018772
1832	Glaucoma and aniridia	2	1	0
1833	CORNEA PLANA 2	1	1	C1857574
1834	Fuhrmann syndrome	1	1	C1856728
1835	Ectodermal dysplasia 1, hypohidrotic, X-linked	1	1	C0162359;C3539920
1836	Muscular dystrophy, congenital 1A	1	1	C0026850
1837	Follicle number, association with	1	1	0
1838	Ichthyosis vulgaris	1	1	C0079584
1839	Bronchiectasis	9	1	C2751324;C0006267
1840	Knobloch syndrome 1	1	1	C1849409
1841	Moderate intellectual disability, facial dysmorphism, seizures, speech delay with autistic mannerisms and OCD tendencies	1	1	C0026351
1842	Nightblindness-associated transient tonic downgaze	2	1	0
1843	Sudden cardiac death	26	1	C0085298
1844	METAPHYSEAL ANADYSPLASIA 1, AUTOSOMAL DOMINANT	1	1	C4016643
1845	Preterm labour, association with	1	1	C0022876
1846	Myopathy, early-onset	12	4	C0026848
1847	Fibrosis of extraocular muscles, congenital, 5	1	1	C4015552
1848	MICROCORNEA, MYOPIC CHORIORETINAL ATROPHY, AND TELECANTHUS	1	1	C0266544
1849	Stickler syndrome 2	1	1	C1858084
1850	Permanent neonatal diabetes mellitus	2	2	C1833104
1851	Atrioventricular canal defects	13	2	C1389016
1852	Sensitivity to proteolytic cleavage	1	1	0
1853	Abnormality of neuronal migration	19	3	C1837249
1854	Left-right laterality defect	1	1	C1415817
1855	ATRIAL SEPTAL DEFECT 6	1	1	C2751315;C0018817
1856	Plasminogen Activator Inhibitor-1 Deficiency	1	1	C2750067
1857	Carpenter syndrome 2	1	1	C3554247;C1275078
1858	Insulin-like growth factor deficiency	3	1	C0202098;C0021641;C0795635
1859	Ulnar and fibula absence, with severe limb deficiency	1	1	C1856728
1860	Amyotrophic lateral sclerosis 23	1	1	C4693381
1861	BRACHYDACTYLY, TYPE A1, C	1	1	C1862151;C3554446
1862	Abdominal aortic aneurysm, reduced risk	1	1	C0162871
1863	Ehlers-Danlos syndrome, dermatosparaxis type, mild	1	1	C2700425
1864	Minor connective tissue anomaly	1	1	C0268362
1865	Ulcerative colitis, association with	8	3	C0009324
1866	Brachydactyly A2	2	1	C1832702
1867	Alport syndrome, X-linked	3	3	C1567742;C1567741
1868	Vascular elastogenesis	1	1	C0268351
1869	Marfan syndrome, early-onset	2	1	C0024796
1870	Ichthyosis	11	3	C0079588;C0020757
1871	Reduced cell migration	1	1	0
1872	Factor X deficiency, Riyadh type	1	1	C0015519
1873	Usher syndrome	24	1	C3281066;C0271097
1874	Myopathy & mitochondrial DNA depletion	1	1	C0026848
1875	Hypophosphatemic rickets	1	1	C1704375;C3536983
1876	Klippel-Feil syndrome 3, autosomal dominant	1	1	C3150968;C3150967
1877	Alpha-1 Antitrypsin Deficiency	1	1	C0221757
1878	MANITOBA OCULOTRICHOANAL SYNDROME	1	1	C1855425
1879	Breast cancer, increased risk	10	1	C0678222;C0006142
1880	Ovarian Dysgenesis	2	1	C0342510
1881	Cutis laxa, autosomal dominant	2	1	C0268350
1882	Bilateral kidney / bladder agenesis & hypertrophic heart	2	1	C0227665
1883	Gorlin syndrome, modifier	4	1	C0004779
1884	Laminin alpha 2 chain deficiency, partial	1	1	C1263858;C1842898
1885	Testosterone levels, association with	1	1	C0523912
1886	ACROMICRIC DYSPLASIA	1	1	C0265287
1887	Alport syndrome / thin basement membrane nephropathy	3	3	C1567741
1888	Plasminogen activator inhibitor 1 deficiency	1	1	C2750067
1889	Hypofibrinogenemia	3	3	C0553681;C4316812
1890	EPIDERMOLYSIS BULLOSA, JUNCTIONAL, LOCALISATA VARIANT	1	1	C2608084;C0432326;C0079301
1891	Thoracic aortic disorder	15	6	0
1892	FIBRINOGEN CARACAS 2	1	1	C4016067
1893	Epilepsy, partial, with telephone-induced seizures	1	1	C1838062
1894	CARDIOMYOPATHY, DILATED, 1JJ	1	1	C0007193
1895	Intellectual disability, autosomal recessive	131	7	C3714756
1896	Otosclerosis	3	3	C0029899
1897	Orofacial clefting	8	1	0
1898	GELEOPHYSIC DYSPLASIA 3	1	1	C4540511
1899	EPILEPSY, FAMILIAL TEMPORAL LOBE, 7	1	1	C1842564
1900	Autism spectrum disorder with ectodermal dysplasia	1	1	0
1901	Kniest dysplasia	1	1	C0265279
1902	Immunodeficiency, primary	62	6	C0398686
1903	Sepsis, modifier of	37	1	C0036690;C0243026
1904	Kidney and urinary tract abnormalities	3	1	0
1905	Pes cavus	1	1	C0039273;C2239098;C0728829
1906	Retinitis Pigmentosa, Recessive	33	3	C0035334
1907	Cerebral ataxia, autosomal dominant	1	1	C1836383
1908	other disorders of soft tissue	1	1	C0158370
1909	COL4A3-Related Disorders	1	1	C1704812;C1332774;C1314894
1910	Schwartz Jampel syndrome type 1	1	1	C0036391
1911	Prelingual hearing loss without vestibular dysfunction	1	1	0
1912	Papillon-Lefevre Syndrome	1	1	C0031106;C0030360
1913	Conotruncal heart malformations	5	1	C1857586;C0041207
1914	Junctional Epidermolysis Bullosa	4	4	C0079301
1915	scoliosis.	1	1	C0559260;C0036439;C0700208
1916	LUMBAR DISC DISEASE, SUSCEPTIBILITY TO	1	1	C4016835;C0221775
1917	Telangiectasia, hereditary hemorrhagic, type 5	1	1	C0039445
1918	FUHRMANN SYNDROME	1	1	C1856728
1919	FIBULAR HYPOPLASIA AND COMPLEX BRACHYDACTYLY	1	1	C1856738
1920	Tetra-Amelia Syndrome	1	1	C2931216
1921	Global developmental delay, holoprosencephaly, microcephaly, lumbosacral myelomeningocele, epilepsy, proptosis and diabetes	1	1	C0557874
1922	MENTAL RETARDATION, AUTOSOMAL RECESSIVE 1	1	1	C0025362;C3714756
1923	Sperm egg fusion disorder	1	1	0
1924	Hip dysplasia and spinal osteochondritis	1	1	0
1925	Carotid stenosis, association with	1	1	C1858965;C0007282
1926	Conotruncal heart defects & Neurodevelopmental disorder	14	1	C1853238
1927	Congenital heart disease	277	10	C0152021;C1969657
1928	Dandy-Walker malformation and occipital cephaloceles	2	2	0
1929	CUTIS LAXA, AUTOSOMAL RECESSIVE, TYPE IA	1	1	C0268351;C0010495
1930	Progressive supranuclear palsy	5	1	C0038868
1931	Marfan syndrome, mild, with Williams-Beuren syndrome	1	1	C0024796
1932	MULTICENTRIC OSTEOLYSIS, NODULOSIS, AND ARTHROPATHY	1	1	C0917715
1933	Infertility, female	7	3	C0021361
1934	Crohn's disease, association with	3	3	C1970129
1935	Cortical dysplasia and dysmorphic facies	1	1	0
1936	Leukoencephalopathy	13	1	C0270612
1937	Hereditary Angiopathy with Nephropathy, Aneurysms, and Muscle Cramps	1	1	C2673195
1938	Myopia, severe	2	1	C0271183
1939	Leber congenital amaurosis 17	1	1	C3715164
1940	Immunodeficiency 29	1	1	C4013948
1941	Spinocerebellar ataxia 27	1	1	C1836383
1942	Focal and secondary glomerulosclerosis	2	1	0
1943	Exfoliation glaucoma, association with	1	1	C0206368
1944	CONE-ROD DYSTROPHY 9	1	1	C1423873
1945	Vesicoureteral reflux	5	2	C0042580
1946	HPE spectrum	1	1	0
1947	Obstructive lung disease	1	1	C0600260;C4015794
1948	Deafness, X-linked, 6	1	1	C3806737
1949	Osteoarthritis in males, association with	1	1	0
1950	DEAFNESS, AUTOSOMAL RECESSIVE 91	1	1	C0011053;C0018772
1951	VARIANT OF UNKNOWN SIGNIFICANCE	198	16	C2986382
1952	Collagenopathy, type I with severe hypotonia & postnatal growth impairment	1	1	0
1953	Chronic obstructive pulmonary disease	10	3	C0024117
1954	Nonsyndromic otitis media	1	1	0
1955	Alzheimer disease, late onset	2	1	C0494463
1956	Abnormality of globe size	1	1	C4021945
1957	Macrothrombocytopenia	10	1	C2751260
1958	Aggressive behavior	2	1	C0001807
1959	Idiopathic short stature with multiple intervertebral disc herniation	1	1	0
1960	Loeys-Dietz syndrome	8	3	C2697932
1961	LAMA3-Related Disorders	1	1	C4521467;C1416777;C1416778
1962	Skeletal dysplasia, osteoporosis and flexion contracture	1	1	C0410528;C0029422
1963	Dysfibrinogenaemia	4	3	C4016077;C1260903
1964	Corneal dystrophy, lattice type, with deep deposits	1	1	C1690006
1965	Reduced activity	73	4	C0002986;C0013364
1966	Autistic behavior	11	1	C0856975
1967	Hypophosphatemic Rickets, Dominant	1	1	C1704375;C3536983
1968	Cardiac atrioventricular septal defect	1	1	C1853509
1969	Cuticular drusen	8	7	C0730295
1970	Hearing loss, non-syndromic, autosomal recessive	18	2	C2746083
1971	VACTERL	4	1	0
1972	ANGIOEDEMA, HEREDITARY, TYPE III	1	1	C1857728
1973	Nephrotic syndrome 5 with or without ocular abnormalities	1	1	C3280113
1974	Ulna and fibula absence of with severe limb deficiency	1	1	C1848651;C1856728
1975	OMODYSPLASIA 1	1	1	C1850318
1976	Absent cochlear nerves	1	1	0
1977	Spinocerebellar ataxia 35	1	1	C3888031
1978	Non-Immune hydrops fetalis	10	1	C0455988
1979	Colobomatous microphthalmia, corpus callosum hypoplasia, heart defect	2	2	C4255043
1980	Kidney disease	3	1	C0022658
1981	Reduced antithrombin III activity	1	1	C0272375
1982	Ocular disease	1	1	0
1983	Vasculitic neuropathy	1	1	C1960443
1984	Deafness, autosomal dominant 13	1	1	C1866095
1985	Hearing loss, non-syndromic, autosomal dominant	16	1	C1384666;C0011053;C0018772
1986	Reduced heparin binding	1	1	0
1987	Idiopathic arthritis & mitral valve prolapse	1	1	0
1988	Marfan syndrome with aortic and mitral regurgitation	1	1	0
1989	Alzheimer disease, late-onset	14	1	C0494463
1990	Amegakaryocytic thrombocytopaenia, congenital	2	1	C3501762;C3275998;C1327915
1991	Hip bone mineral density, association with	4	2	0
1992	Cutis laxa, autosomal recessive, type 1C	1	1	C2750804
1993	CORNEAL DYSTROPHY, REIS-BUCKLERS TYPE	1	1	C0339278
1994	Deep venous thrombosis	7	5	C0149871
1995	Lower plasma eotaxin levels	1	1	0
1996	Familial exudative vitreoretinopathy	12	1	C4072980;C0339539;C1851402
1997	Michel aplasia, microdontia & malformation of the external ear	1	1	0
1998	MYASTHENIC SYNDROME, CONGENITAL, 5	1	1	C0751882
[truncated: 1,002 more rows]

## Sheet: ALL_Disease_GO_P_Analysis
GO_Pathway	oddsratio	p_value	common_genes	p_value_arr
GO_POSITIVE_REGULATION_OF_VIRAL_TRANSCRIPTION	0.511715	0.98827	DHX9,LEF1,CHD1,NELFB,EP300,POLR2C,SMARCB1,SP1,TFAP4,POLR2A,SMARCA4,SUPT5H,RSF1,RRP1B,CDK9	{[15.0,10555.0],[26.0,9362.0]}
GO_CARDIAC_CHAMBER_DEVELOPMENT	5.09991	1.37275e-18	CITED2,WNT11,FOXH1,HEY2,RYR2,BMP10,HAND1,CHD7,HEG1,NOTCH1,PKP2,CAV3,TBX2,SALL4,MYH6,FGFRL1,NRP2,DNAH11,NOTCH2,MYBPC3,ROBO2,EGLN1,DNM2,SRF,BMPR2,SMAD7,TBX3,ZFPM1,TBX20,DSP,GATA4,ANK2,NPRL3,TEK,NRG1,LTBP1,SOS1,ROBO1,MYL3,SUFU,CCN1,TBX5,TNNI1,NSD2,COL11A1,MKS1,MESP1,MYH10,MEF2C,TGFBR3,SEMA3C,GATA6,GATA3,FGF8,RBPJ,MDM2,PTK7,TGFBR1,SMAD4,TNNC1,HIF1A,MYL2,SLIT3,DCTN5,VANGL2,STRA6,DAND5,GREB1L,SFRP2,RAR…	{[142.0,10428.0],[25.0,9363.0]}
GO_DNA_DEPENDENT_DNA_REPLICATION_MAINTENANCE_OF_FIDELITY	3.26371	0.000538945	MSH6,PCNA,MSH3,RTEL1,FANCM,WRN,CDK9,GEN1,TIPIN,TIMELESS,SMARCAL1,DDX11,POLD1,ZNF365,POLE,MCM9,EME1,DNA2,MMS22L,PRIMPOL,ATRX,BLM,DONSON,FBH1,SETMAR,RFWD3,SAMHD1,BRCA2,RAD51,MRE11,TONSL,EME2,ZRANB3	{[33.0,10537.0],[9.0,9379.0]}
GO_CIRCADIAN_RHYTHM	3.50079	6.04385e-15	TP53,TNFRSF11A,PROK1,NMU,NPAS2,CRX,TIMELESS,NDUFA9,SUV39H1,BHLHE40,HNRNPL,CLOCK,SOX14,SIRT1,RORC,NFIL3,SIX3,USP2,CARTPT,DRD3,PROKR1,AANAT,CREB1,CSF2,NPS,TPH2,AGRP,NTRK2,MTNR1B,PRKDC,RORA,RBM4B,RORB,NCOR1,CLDN4,SETX,GSK3B,GNA11,BHLHE41,SIK1,OPN4,CHRNB2,PRKCG,RPE65,MAGEL2,TH,PML,GHRL,PRKAA1,NAMPT,GHRHR,DRD4,IMPDH2,HNRNPU,NGFR,PPARA,AHCY,ATF4,KCND2,KLF10,SFPQ,HTR7,HCRTR2,LEP,EZH2,NKX2-1,PSPC1,TOP1,A…	{[156.0,10414.0],[40.0,9348.0]}
GO_PHOSPHATIDYLSERINE_ACYL_CHAIN_REMODELING	0.807249	0.761179	PLA2G2D,PLA2G4A,LPCAT4,PLA2G5,OSBPL5,PLA2G10,PLA2G4E,OSBPL8,PLA2G2A,PLA2G12A	{[10.0,10560.0],[11.0,9377.0]}
GO_SPINAL_CORD_DEVELOPMENT	2.6769	2.99785e-06	GIGYF2,GLI3,LHX4,PBX3,ACTL6A,NOTCH1,OLIG2,ASCL1,IFT122,GDPD5,DMRT3,RELN,DAB1,OLIG3,PTPRS,GDF11,NKX6-1,TBX20,MED12,MPST,LHX1,PLXDC1,MNX1,SUFU,NKX2-2,WNT3A,CHRD,PHGDH,MDGA1,PKD1,IFT172,PAX6,DAAM2,GATA2,GLI2,LOXL3,ZIC1,AKT1,MTOR,HOXD10,DLL1,ISL1,TAL1,NOG,DCTN1,SMO,INTU,SOX11,DCC,LHX3,GDNF,EED,SOX4,ACTL6B,PKD2,ZC4H2,NEFL,HOXC10,TCTN1,VLDLR,PTBP2,NFE2L1,PTCH1,WNT1,NEUROG3,PAX7,ERCC2,SHH,DBX1,PHOX2A,FO…	{[78.0,10492.0],[26.0,9362.0]}
GO_PLATELET_DERIVED_GROWTH_FACTOR_RECEPTOR_SIGNALING_PATHWAY	2.33677	0.00191913	LRIG2,PDGFB,PTEN,LOX,SNCA,PDGFRA,FER,PTPRJ,ABL1,VEGFA,PDGFRB,ZFAND5,PTPN12,APOD,PTGIR,ARID5B,PTPN1,NDRG4,PDGFD,MYO1E,HIP1,ADIPOQ,HIP1R,PDGFRL,MYOCD,JAK2,CBL,BCAR1,PIK3C2A,CBLB,SGPL1,BCR,IQGAP1,SRC,RAPGEF1,SLC9A3R1,PLAT,PTPN2,NRP1,LRP1,F7,PTPN11	{[42.0,10528.0],[16.0,9372.0]}
GO_CELLULAR_RESPONSE_TO_LIPOPROTEIN_PARTICLE_STIMULUS	1.33292	0.253758	NPC1,TLR4,AKT1,TICAM1,LPL,ADAM17,LDLR,ABCA1,CASR,CD9,TLR6,ITGB2,PPARG,SYK,APOE,ITGB1,CD36,ABCG1,SREBF2,CDH13,MYD88	{[21.0,10549.0],[14.0,9374.0]}
GO_POSITIVE_REGULATION_OF_EPITHELIAL_CELL_DIFFERENTIATION	1.77959	0.0166209	LIF,SOX9,IL13,WNT10B,SERPINE1,BMP6,KDF1,PROM1,FOXN1,GDF2,ZEB2,CDH5,NOTCH1,PAX2,LHX1,AHI1,PTCH1,RFX3,S1PR2,ADD1,VDR,SULT2B1,MED1,FOXC1,PRKCH,CYP27B1,ADIPOQ,MESP1,BMP4,ATOH1,BAD,PROC,NUMA1,ALOX15B,PAX6,SFRP4,PAX8,ACVRL1,NCOA3,CD24,NKX6-1,GDNF,PTCH2,CTNNB1	{[44.0,10526.0],[22.0,9366.0]}
GO_POSITIVE_REGULATION_OF_KINASE_ACTIVITY	2.03191	9.06569e-16	FGR,INSR,SPRY2,ARHGEF5,TNFRSF11A,DLG3,CRKL,DAB2IP,SIRT1,CCNK,RELN,IRAK2,JAK2,ADCY6,FGFR3,CDKN1A,NTRK2,IL23R,TAB2,RASGRP1,CD40LG,CD24,AGER,PDGFB,TIRAP,SNCA,NEK10,SOCS1,FPR1,DOK7,NRG1,P2RX7,CDC6,ADCY8,ROBO1,PRKAA1,CCN1,CDK5R2,FZD10,PDPK1,TRAF7,WNT3A,PIFO,CCNB1,PRKACG,PARK7,BMP2,PAK6,PFKFB2,UBB,TNIK,CHRNA3,ERCC6,MAP2K7,MAPK8IP3,TNFRSF10B,NOD1,MAP3K7,DOCK3,S1PR2,PRKAG1,GDF15,STK4,FGF13,CCL5,DGKZ,NOD2…	{[395.0,10175.0],[176.0,9212.0]}
GO_POTASSIUM_ION_TRANSPORT	2.40063	2.06174e-10	KCNS1,HCRT,GALR2,PTK2B,KCNH7,KCNN2,ATP4A,KCNJ2,SNAP25,WWP2,KCNN4,KCNMA1,KCNT2,KCNK9,CAV3,KCNJ10,ATP1A2,KCNQ4,KCNQ1,SLC9A3,AQP1,SLC9A4,KCNE4,KCNF1,DPP6,HCN2,KCNH2,SLC1A3,VAMP2,TRPM5,HCN1,KCNH3,KCNN3,ADRA2A,SLC24A2,KCNK3,MTNR1B,HCN4,KIF5B,DNM2,NEDD4,SLC12A3,KCNJ12,KCNE5,ABCC9,KCNT1,ANO6,KCNK7,KCNQ5,SLC9A1,ANK2,KCNB2,CDKN1B,KCNV1,KCNA4,KCNE2,KCNV2,SLC12A9,KCNJ3,ABCC8,KLHL24,KCNC4,KCNJ8,CACNA1D,BIN1,…	{[174.0,10396.0],[65.0,9323.0]}
GO_REGULATION_OF_T_CELL_RECEPTOR_SIGNALING_PATHWAY	2.18309	0.0178276	PAWR,CYLD,CCR7,CEACAM1,PTPRJ,CD226,UBASH3A,PTPN6,KCNN4,RAB29,ADA,BTN2A2,MALT1,RELA,NECTIN2,PHPT1,CACNA1F,PTPN22,EZR,RC3H1,LGALS3,LCK,PRKD2,BCL10,PRNP,PTPN2,DUSP3	{[27.0,10543.0],[11.0,9377.0]}
GO_NEGATIVE_REGULATION_OF_EPITHELIAL_CELL_PROLIFERATION	1.12362	0.255745	CEACAM1,PTPRK,KDF1,GDF2,CDK6,NR2F2,DAB2IP,SPARC,IFT122,CDKN2B,WDR13,THBS1,CPB2,RUNX3,SFRP1,XDH,SCG2,APOE,EFNB2,IFT74,CDC73,SOX9,CDKN1B,AIMP1,GPC3,SOX2,WFDC1,MEN1,TNF,PTPRM,GHRL,ROBO1,SNAI2,STK11,SULF1,NGFR,MEF2C,AR,IFT172,IFT80,PAX6,TGFBR3,CASK,FLT1,GATA3,TGFBR1,BRCA2,ATP5F1A,PTEN,CD109,NFIB,NKX2-8,IFT57,SFRP2,IFT52,NKX3-1,GDF5,TGFB1,ISL1,KRT4,BMP4,INTU,PPARG,APOH,EPPK1,CDKN1C,CAV1,FGFR2,WNT10B,F…	{[91.0,10479.0],[72.0,9316.0]}
GO_MOVEMENT_IN_ENVIRONMENT_OF_OTHER_ORGANISM_INVOLVED_IN_SYMBIOTIC_INTERACTION	1.05481	0.50626	MID2,CHMP4C,SMC3,TRIM5,TRIM8,PML,PC,TSG101,CHMP3,TRIM11,VAPA,CHMP2B,TRIM32,DDB1,RAB7A,TRIM28,CHMP4B,VPS4A,CHMP2A	{[19.0,10551.0],[16.0,9372.0]}
GO_REGULATION_OF_PROTEIN_TARGETING_TO_MITOCHONDRION	1.06596	0.47748	MICALL2,NPEPPS,FBXW7,RAC2,PARL,LRRK2,CSNK2A2,PRKAA1,BAP1,HUWE1,VPS11,UBE2J2,LMAN1,FZD5,PRKN,HSPA1L,HAX1,HPS4,BAG3,HTRA2,PINK1,SREBF1,SREBF2,RNF31	{[24.0,10546.0],[20.0,9368.0]}
GO_APICAL_PROTEIN_LOCALIZATION	3.99934	0.0497497	DLG5,RDX,ARF4,VANGL2,SHROOM2,GOPC,CELSR1,HCN1,SHROOM3	{[9.0,10561.0],[2.0,9386.0]}
GO_REGULATION_OF_ESTABLISHMENT_OF_PLANAR_POLARITY	2.24394	5.36752e-05	WNT11,DAB2,ABL1,CELSR1,PSMA7,WNT9B,PSMB4,PARD6A,DACT1,CDC42,SFRP1,VANGL1,PSMD9,CTHRC1,PSMC4,GRHL3,FZD6,MED12,AP2M1,GPC3,SMURF2,PSMA8,ROR1,PSMB8,AP2A2,MKS1,TIAM1,PSMD6,DAAM1,FZD4,FZD3,PSMC2,DVL3,PTK7,FZD7,PSMB9,VANGL2,SFRP2,PSMD2,AP2S1,FZD1,RYK,DKK1,ZNRF3,RHOA,PRICKLE1,SMURF1,FZD5,FZD2,PSMD8,PSMD12,PSME4,CLTC,PSMB1,SEC24B,PSMC5,NPHP3,MAGI2,PRICKLE2,DVL2,ANKRD6,CELSR3,PSMB7,WNT1,ARRB2,WNT5A,PFN1,CE…	{[78.0,10492.0],[31.0,9357.0]}
GO_FOREBRAIN_NEURON_DEVELOPMENT	8.30899	9.69599e-06	CNTN2,OGDH,AUTS2,ATP7A,RAPGEF2,FEZF2,PLXNA3,UQCRQ,LHX6,ROBO1,FOXG1,SLIT2,LHX8,DRD2,WNT5A,DCLK2,RAC3,FGFR2,SEMA3A,NRP2,DRD1,UBB,FGF8,ARX,SALL3,NRP1,SLC4A10,ROBO2	{[28.0,10542.0],[3.0,9385.0]}
GO_POSITIVE_REGULATION_OF_PROTEIN_MATURATION	1.57985	0.182845	NKD2,F12,TFR2,CLEC3B,MYH9,SOX4,GSN,CNTN2,SRC,MELTF,CCBE1,ENO1,KLKB1,MMP14,ASTL,ANGPTL8	{[16.0,10554.0],[9.0,9379.0]}
GO_NEUROMUSCULAR_JUNCTION_DEVELOPMENT	7.66541	5.89321e-08	AGRN,CACNB1,ZC4H2,LAMB2,CHRNA1,ERBB2,SHANK1,GPHN,KALRN,COL4A1,LRRK2,UNC13A,F2R,PDZRN3,CACNG2,AFG3L2,SHANK3,APP,UNC13C,CRKL,NRDC,SIX4,DCTN1,COLQ,CACNB4,UTRN,CACNA2D2,SIX1,UNC13B,DVL1,CACNB3,MUSK,LRP4,ALS2,ANK3,SHANK2,TNC,NEDD4,COL4A5,DNAJA3,FZD9,CACNB2,P2RX2	{[43.0,10527.0],[5.0,9383.0]}
GO_MITOTIC_CYTOKINESIS	1.18493	0.28089	RASA1,ESPL1,STAMBP,CHMP4C,KIF20A,CEP55,APC,CIT,ZFYVE26,PLK1,CNTROB,CUL7,KIF4B,CHMP3,CHMP2B,USP8,UNC119,SON,SPTBN1,RHOA,EFHC1,ARF1,MYH10,KLHDC8B,ARL3,BBS4,SPAST,ANLN,KIF4A,CHMP1A,NUP62,CHMP4B,ANK3,BRCA2,VPS4A,CHMP2A,CDT1,INCENP,TRIM36,TTC19	{[40.0,10530.0],[30.0,9358.0]}
GO_NEGATIVE_REGULATION_OF_RESPONSE_TO_ENDOPLASMIC_RETICULUM_STRESS	0.887941	0.707648	PDX1,NCK1,WFS1,CREB3,LRRK2,GRINA,PTPN1,BFAR,OPA1,DNAJB9,MAGEA3,PARK7,CREB3L1,PRKN,DNAJC3,RACK1,XBP1,HYOU1,SYVN1,USP14,CLU,PPP1R15B	{[22.0,10548.0],[22.0,9366.0]}
GO_SMAD_PROTEIN_SIGNAL_TRANSDUCTION	2.77793	7.38242e-05	AFP,SKI,FOS,BMP5,MAGI2,DAB2,BTBD11,BMP6,GDF2,BMP10,CILP,HNF4A,GDF10,LEFTY1,SMAD3,TBXT,VIM,GDF5,PARP1,TGFB1,SMAD2,INHBB,GDF6,LEFTY2,SLC33A1,LNPEP,SPTBN1,GDF15,BMP4,CCN3,BMP15,BMP2,INHA,RBM14,BMP7,INHBA,GDF1,TGFB2,NUP93,INHBC,SMAD1,GDF9,TGFBR1,SMAD4,GDF3,NODAL,GDF11,SMAD9,BMPR1A,BMP8B,ROR2,TGFB3,MSTN	{[53.0,10517.0],[17.0,9371.0]}
GO_CYTOPLASMIC_TRANSLATION	0.673086	0.978369	DHX9,AARS,RPL10A,NCK1,RPL19,MTOR,DPH1,RPL36,EIF3B,RPL9,RPS28,RPS29,GSPT2,EIF5,RPL26,RPS26,DPH7,RPLP0,EIF3F,RPL11,RPL18,RPS23,RPL35A,RPL15,JAKMIP1,DHX36,EIF3J,EIF3H,FTSJ1,EIF3G,FMR1,EIF2S3,CPEB3,ZNF385A,RPLP1,DENR,DRG1,EEF2,EIF4G1,HSPA14,EIF3E	{[41.0,10529.0],[54.0,9334.0]}
GO_MEIOTIC_CHROMOSOME_SEGREGATION	1.50991	0.0368362	PPP2R1A,RNF212,SYCE1,ESPL1,REC8,RMI1,SLX4,SMC2,MLH3,NDC1,UBE2B,BAG6,NCAPH,TRIP13,SGO1,SUN1,FMN2,PLK1,STAG3,C14orf39,TEX11,BRIP1,SYCE2,MUS81,WAPL,RAD51C,MEI1,EME1,TEX15,MAPK15,SPO11,TOP2B,FANCD2,ERCC4,SGO2,MSH4,DMC1,AGO4,TTK,TOP2A,MLH1,HFM1,SPATA22,BUB1,CCNE1,BLM,MAJIN,MEIOB,RAD21L1,SYCE1L,BUB1B,HORMAD1,MRE11,EME2,MSH5,FANCM	{[56.0,10514.0],[33.0,9355.0]}
GO_POSITIVE_REGULATION_OF_CALCIUM_ION_TRANSPORT	1.80514	0.00138506	HCRT,IL13,ABL1,RYR2,NPSR1,TRPC6,F2RL3,CALM3,SRI,TRPC3,P2RX5,CD19,TSPO,CACNB2,SLC9A1,PDGFB,ANK2,CAPN3,SNCA,TRPV3,KCNE2,P2RX7,HOMER1,CACNA1D,PLCG2,CASR,PDPK1,LILRA2,LPAR3,BAX,CASK,JPH2,HAP1,CASQ1,CALM2,KCNE3,STAC2,CAMK2A,F2R,FFAR1,GSTO1,CX3CL1,HTT,PLCG1,CCL5,GRM6,CALCR,CAV1,F2,PKD2,P2RX2,ATP1B1,MCHR1,STAC3,CEMIP,WFS1,P2RX4,PDGFRB,CRACR2A,MYLK,CRH,CALM1,FGF14,ARRB2,ORAI1,CD4,TRDN,CACNA2D1,TRPC1,GJC2…	{[79.0,10491.0],[39.0,9349.0]}
GO_REGULATION_OF_DOUBLE_STRAND_BREAK_REPAIR	0.98681	0.569393	WRAP53,UBR5,CHEK1,RIF1,RTEL1,PARP9,FOXM1,KLHL15,FUS,TIMELESS,FANCB,PML,FMN2,USP51,SMCHD1,MGMT,DDX11,PARP1,SLF2,TP53BP1,ZNF365,KDM1A,NSD2,MAD2L2,TWIST1,HMGA2,TEX15,HELB,OGG1,POLQ,SETD2,RECQL5,TERF2IP,WAS,BLM,FBH1,SPIDR,SETMAR,TRIP12,RAD51	{[40.0,10530.0],[36.0,9352.0]}
GO_RNA_DEPENDENT_DNA_BIOSYNTHETIC_PROCESS	1.60825	0.0320001	CCT4,WRAP53,MAP2K7,NAT10,POT1,TERF2,NOP10,CCT2,SMG6,MAP3K4,PNKP,CCT7,PRKCQ,GNL3L,TNKS,DKC1,HNRNPU,NAF1,TEP1,CCT5,RPA1,MAPK15,RPA4,HSP90AA1,ATR,SMG7,MAPK1,AURKB,ATM,PIF1,STN1,HSP90AB1,TERF2IP,PARN,MAPK3,RFC1,ACD,NEK2,NHP2,SRC,TERT,XRCC5,CTC1,MRE11,RAD50,HNRNPA1,CTNNB1	{[47.0,10523.0],[26.0,9362.0]}
GO_REGULATION_OF_B_CELL_RECEPTOR_SIGNALING_PATHWAY	1.01508	0.557781	PLCL2,FOXP1,PAX5,FCGR2B,STAP1,PTPRC,ELF2,RUNX1,BLK,CD22,PRKCB,PTPN22,LYN,PTPN6,PRKCH,CD19	{[16.0,10554.0],[14.0,9374.0]}
GO_DENDRITE_DEVELOPMENT	3.51564	9.93741e-17	LZTS3,SHANK1,NLGN3,ADGRB3,HDAC6,MINK1,KALRN,TRAK1,TAOK2,CDK5,CRKL,DAB2IP,TRPC6,EEF2K,CUX2,OPA1,CDC42,ARHGAP44,ZNF365,RELN,LZTS1,KNDC1,EPHB1,RERE,CUX1,DAB1,CAPRIN2,EPHB2,PTPRS,PREX2,OBSL1,DNM1L,DCDC2,IQGAP1,GSK3B,NEDD4,APOE,CAMK1D,PQBP1,PREX1,PSEN1,PRKG1,RAB21,CHRNB2,DTNBP1,MAPK6,SDK1,ARF4,ABI2,CAMSAP2,EPHA4,ACSL4,SS18L1,DSCAM,SHANK3,UBA6,GRIP1,DCLK1,GHRL,MATN2,DLG4,KIDINS220,SYNGAP1,FLRT1,KIAA031…	{[176.0,10394.0],[45.0,9343.0]}
GO_REGULATION_OF_RESPIRATORY_BURST	1.14206	0.496814	RPS19,BCR,INSR,CAMK1D,GRN,INS,LBP,RAC2,RAC1	{[9.0,10561.0],[7.0,9381.0]}
GO_G_PROTEIN_COUPLED_RECEPTOR_INTERNALIZATION	1.77708	0.211509	DRD3,DNM1,ARRB1,DNM2,GRK4,DRD2,ARRB2,UBQLN2,HTR1B,HTR2B	{[10.0,10560.0],[5.0,9383.0]}
GO_MEMORY	2.52879	3.06569e-06	ATAD1,INSR,SHANK1,KALRN,CUX2,MAPT,NTF3,JPH3,BDNF,KMT2B,RELN,ITGA8,FEN1,CREB1,OXTR,SLC24A2,SRF,CX3CR1,APOE,PSEN1,DBH,CHRNB2,LMX1A,RIN1,TH,ITGA3,ABCC8,SORCS3,SHANK3,ADCY8,ITPR3,LGMN,NQO2,MAP1A,MUSK,CTNS,GIP,PLA2G6,PTEN,MTOR,ADCY1,ABCA7,ADGRF1,NPAS4,KCNK4,CIC,PLK2,NTAN1,CNR1,CHRNA7,FGF13,SLC17A7,CPEB3,PTGS2,ARC,CAMK4,GRIN2A,NGF,ATXN1L,BTBD9,SLC8A3,VLDLR,RASGRF1,HTR2A,SLC6A4,LDLR,GRIA1,ITGA5,DRD2,SER…	{[85.0,10485.0],[30.0,9358.0]}
GO_NEURON_DEVELOPMENT	2.99943	8.79163e-60	DENND5A,SHANK1,NEXN,UNC5D,SPOCK1,HDAC6,FAT4,PRRX1,TRAK1,CASP3,TENM4,CRKL,DAB2IP,SCN1B,EEF2K,CABP4,CDHR1,PTPRZ1,ZNF365,TRIM32,CYFIP2,IRS2,RELN,RUNX3,SFRP1,KNDC1,JAK2,ADCY6,EDNRB,CTHRC1,NTRK2,EPHB2,RORB,WDR5,OBSL1,RIMS1,TUBB3,SRF,THOC2,WDR36,PQBP1,FLRT3,CTSZ,GABRA5,SLC4A10,TBCD,RAB21,AGER,CACNG7,CHRNB2,SCRIB,GRB10,AGRN,LRIG2,NTNG1,STX3,FEZF1,KATNB1,ABI2,NTM,GNAO1,ITGA3,MTR,OPHN1,PIK3R1,SHANK3,PTPRF…	{[835.0,9735.0],[261.0,9127.0]}
GO_REGULATION_OF_GOLGI_ORGANIZATION	3.5556	0.0300418	MAP2K2,MAPK3,MAP2K1,RAB33B,DNM2,PDE4DIP,CAMSAP2,MAPK1,USP6NL,CAMSAP3,AKAP9,RBSN	{[12.0,10558.0],[3.0,9385.0]}
GO_ENDOTHELIAL_CELL_DEVELOPMENT	3.88879	5.05171e-06	COL23A1,RAPGEF3,ARHGEF26,ENG,AFDN,RAP1A,TJP2,RAPGEF2,FASN,CDH5,PECAM1,HEG1,TNF,COL4A4,ROCK1,S1PR2,GPX1,IKBKB,GSTM3,ADD1,ICAM1,ROCK2,RDX,SOX18,TJP1,PDE4D,IL1B,PROC,EZR,WNT7A,NOTCH4,MARVELD2,RAP1B,CLDN1,S1PR3,PTPRS,TNFRSF1A,F2RL1,PDE2A,PLOD3,CLIC4,RAPGEF1,CCM2,COL18A1,WNT7B,MET,CTNNB1,MSN	{[48.0,10522.0],[11.0,9377.0]}
GO_POSITIVE_REGULATION_OF_MYOTUBE_DIFFERENTIATION	1.92666	0.0389058	CD53,FAM129B,NFATC2,MTOR,LMOD3,CYP26B1,BCL2,CAV3,EHD2,SHOX2,MYF6,EHD1,MYOD1,TNFSF14,MMP14,GDF15,MYOG,ADGRB1,MYF5,TBX1,RIPOR2,IL4R,SMYD1,FLOT1,CAPN2,MAML1	{[26.0,10544.0],[12.0,9376.0]}
GO_REGULATION_OF_CELL_ACTIVATION	1.44526	6.62564e-06	FGR,ZBTB16,HLX,CD27,IL13,CD226,CASP3,BTN2A2,TP53BP1,MMP14,IRS2,RUNX3,SFRP1,ZFP36L1,JAK2,INHBA,IL23R,RASGRP1,CD40LG,CD24,AGER,SHPK,CHRNB2,PDGFB,ITPKB,TIRAP,SNCA,BPI,SOCS1,LILRB2,ZMIZ1,CCR2,TREX1,PIK3R1,SOX13,CD9,PDPK1,WNT3A,CD2,TBX21,ZC3H12A,GATA3,STXBP2,SIRPB1,PAWR,CD38,TICAM1,RIF1,HLA-E,GNRH1,IL27,GLMN,AP3D1,HSPH1,TNFRSF21,RARA,CCL5,IGHM,GRN,TMEM131L,EGR3,NOD2,SOX11,AP1G1,IL12B,PGLYRP2,IL31RA,F2…	{[375.0,10195.0],[233.0,9155.0]}
GO_MULTICELLULAR_ORGANISM_AGING	3.43203	0.00130406	ERCC1,ZMPSTE24,INPP5D,MSH6,COQ7,TP53,PRDM2,HYAL2,CISD2,WRN,TH,LRRK2,SLC1A2,TREX1,COMP,NDUFS6,GHRHR,RAD54L,POU1F1,SEC63,MSH2,EDN1,DDC,CRYAB,LEP,TP63,NR5A1	{[27.0,10543.0],[7.0,9381.0]}
GO_ATP_DEPENDENT_CHROMATIN_REMODELING	0.866004	0.775987	HJURP,ACTB,MBD2,HDAC1,RBBP4,SMARCB1,SRCAP,SMARCA1,SMARCAD1,SYCP3,CHD4,RUVBL1,ACTL6A,INO80,MBD3,CENPI,SMARCC2,SMARCC1,PBRM1,SMARCA4,RSF1,ARID1A,PIWIL1,HDAC2,KNL1,CENPH,CHD8,MIS18BP1,HIST1H4C,GATAD2B,SPTY2D1,SMARCE1,RNF8,SMARCD2,CHD5,NPM1,HIST1H4I,PSME4,SMARCA5,CENPT	{[40.0,10530.0],[41.0,9347.0]}
GO_ANATOMICAL_STRUCTURE_FORMATION_INVOLVED_IN_MORPHOGENESIS	2.14975	3.99977e-34	ERCC1,COL4A3,COL6A1,SPRY2,KBTBD8,IRX3,HEY2,MYOM1,CELSR1,CDX1,CCR3,GDF2,ACTL6A,JAK1,CASP3,TCF21,TENM4,BHLHE40,KDR,CAV3,DAB2IP,ANGPTL3,LIAS,SIRT1,SPARC,IFT122,SMAD2,MMP14,RELN,PTF1A,DSPP,SFRP1,PGK1,KNDC1,RFX2,CTHRC1,SPINT2,INHBA,EPHB2,PLEKHO1,OBSL1,HDAC7,OSR1,SRF,CX3CR1,SHROOM3,GATA4,HDAC5,SCRIB,HYAL1,LMOD3,ITGA3,SARS,CCR2,PML,OPHN1,PLXDC1,ROBO1,ANPEP,EPHA1,MEOX1,KLF5,SUFU,CCN1,PTPN14,MPIG6B,PODXL,…	{[819.0,9751.0],[353.0,9035.0]}
GO_ION_TRANSPORT	2.08362	1.1524e-43	TPCN1,TMCO1,GNB5,SCN1A,FABP1,SHANK1,IL13,CACNA1A,APOA4,KCNH7,THADA,TNFRSF11A,SCN3A,SLC17A4,PLA2G2A,DLG3,SLC22A5,CLCN2,SLC25A12,CLNS1A,FOLR3,SLC6A1,KCNN4,NDUFA9,CYB5A,GABRR2,CAV3,ATP6V0A1,GRIA3,SCN1B,SLC24A1,KCNQ1,CA12,TMC6,CACNA1G,SLC9A4,CHRFAM7A,DMPK,KCNE4,JPH3,IRS2,SLC30A6,SLC33A1,SLC48A1,LETM1,RELN,HTR1A,HCN2,SRI,SLC35C2,KCNH2,PRSS8,ANO10,VAMP2,GLRA1,TRPM5,TRPM8,CYBA,NCOR1,SLCO1B1,PTH,SLC22A1,…	{[1155.0,9415.0],[522.0,8866.0]}
GO_LIPID_MODIFICATION	1.98613	3.89498e-07	C1QTNF2,PDK4,AUH,FABP1,AKT2,APOA4,APPL2,PLPP1,MTMR2,PIK3R3,AGTR1,PECR,ACADM,ETFDH,B4GALNT1,IRS2,DECR1,HADHB,TWIST1,CPT2,MTMR3,INPP5F,PIP5K1C,ECH1,IMPA1,PI4K2A,SOAT1,MTMR8,SPHK2,STARD4,APOE,PIK3C2B,PIK3CB,HADH,CYP3A5,ABCG1,INPP1,FABP3,SESN2,APOA5,GBA,SOCS1,SLC35C1,ADIPOR1,EFR3A,ADH7,ALOX12,PIK3R1,ACOX1,PRKAA1,PLPP6,CPT1B,HIBCH,CPT1C,AGK,SOCS3,PPARA,CYP4A22,GCDH,INPP5J,ETFB,ACACB,DGKA,MECR,MLYCD,DG…	{[162.0,10408.0],[73.0,9315.0]}
GO_NEGATIVE_REGULATION_OF_KIDNEY_DEVELOPMENT	6.66935	0.00249493	PAX2,ADIPOQ,BMP4,GATA3,OSR1,HNF1B,MMP9,PAX8,FLCN,TACSTD2,SHH,BMP7,CTNNB1,WT1,STAT1	{[15.0,10555.0],[2.0,9386.0]}
GO_REGULATION_OF_HEPATOCYTE_PROLIFERATION	2.96244	0.0707188	XBP1,CEACAM1,TNFAIP3,CPB2,GLI1,FBXW7,MED1,SULF2,LIMS2,WNT3A	{[10.0,10560.0],[3.0,9385.0]}
GO_ACYLGLYCEROL_HOMEOSTASIS	4.59946	8.62944e-05	SESN2,APOA4,SCARB1,LPL,HNF4A,ACSM2A,ADORA1,MED13,ANGPTL3,MLXIPL,SIRT1,GPIHBP1,NR1H3,FITM2,ANGPTL8,APOA1,LIPC,DGAT2,APOC2,APOC3,IL18,RORA,APOC4,NR1H4,XBP1,GCKR,APOE,CETP,APOA5,ANGPTL4,GIP	{[31.0,10539.0],[6.0,9382.0]}
GO_NEGATIVE_REGULATION_OF_PROTEIN_COMPLEX_ASSEMBLY	1.50845	0.0133757	SPTBN5,MKKS,KANK4,SOST,OPRD1,NOP53,SPTAN1,DACT1,CDC42,RDX,VILL,ADD2,CRYAB,GSK3B,CLU,TBX20,TBCD,GBA,SNCA,LMOD3,ULK1,TRAF3IP1,CARMIL2,SPTBN4,ARFGEF1,ADD1,PEX14,PPM1A,FHOD3,EPS8,PRRT2,INPP5J,MAPRE1,SPTBN2,RAF1,PARK7,ARHGEF2,TRIM9,TUBB4A,SPTA1,DMTN,CLIP3,SORL1,SRC,KANK1,TRIOBP,TMC8,MAP2,CAPG,STXBP1,KIF14,VIL1,INS,LMOD1,SLIT2,SIRT2,DKK1,PEX5,ALB,SPTBN1,HIP1R,THRA,SPTB,CAPZA1,CRBN,PRKCD,ADD3,IAPP,LDLRA…	{[83.0,10487.0],[49.0,9339.0]}
GO_HEMOGLOBIN_METABOLIC_PROCESS	3.55366	0.226673	AHSP,EPB42,CAT,ADD1	{[4.0,10566.0],[1.0,9387.0]}
GO_SINGLE_FERTILIZATION	1.09707	0.321503	KDM5B,CATSPERG,SLC22A16,WDR48,FOLR3,UBAP2L,TBXT,CRKL,TRPC6,UMODL1,ADAM20,HOXA10,ZP4,GLRA1,TRPC3,IGSF8,TRPC7,CACNA1H,HOXA11,ALDOA,ADCY3,MFGE8,ASTL,TRIM36,CCT2,ZP3,ZPBP2,TUBGCP3,CCT7,ATP8B3,MST1R,GLRB,CD9,SPINK1,PLCZ1,PARK7,AR,CD46,WEE2,SMAD4,B4GALT1,PRSS37,SYT6,AKAP4,CCDC136,HOXD10,FOXL2,SERPINA5,ZP1,CCDC87,OR1D2,PKDREJ,HEXB,OVGP1,LHFPL2,ZP2,STX2,CATSPER1,PRND,SPAG1,CCT4,PLCD4,PAEP,DEFB126,ZPBP,CC…	{[79.0,10491.0],[64.0,9324.0]}
GO_CHROMOSOME_ORGANIZATION	1.40649	8.7777e-09	DOT1L,ERCC1,HNRNPA2B1,RTEL1,HDAC6,CTBP1,ACTL6A,PADI4,ASCC3,SUV39H1,USP51,PLK1,HR,SIRT1,UBE2A,SLF2,SHPRH,ZNF365,BABAM2,BRD7,NIPBL,RAD51C,BAHD1,JAK2,MSL2,SMG7,CDC23,USP7,JARID2,BCORL1,NCOR1,UBE2E1,WDR5,SMC6,HDAC7,CDAN1,KDM1B,HIST1H2BE,MKI67,HDAC5,HJURP,REC8,SNCA,KATNB1,TBL1Y,SPIN1,CDCA8,DCLRE1C,CCT2,TRIP13,MEN1,TREX1,PML,CDC6,CDC27,PHF20,ZBTB7A,NAA10,SNAI1,DDX11,PRKAA1,SMARCC2,SMARCA4,EPC1,PAXBP1,I…	{[734.0,9836.0],[473.0,8915.0]}
GO_NEGATIVE_REGULATION_OF_MAP_KINASE_ACTIVITY	1.25006	0.197642	PPP2R1A,DUSP3,GBA,SPRY2,PPP2CA,PTPRJ,HYAL2,SPRED2,SPRY4,PTPN6,SPRY1,SFRP2,MAPK8IP1,SPRY3,CAV3,DAB2IP,PTPN1,RGS2,DUSP1,CBLC,HMGCR,DUSP6,SMPD1,DNAJA1,ADIPOQ,SERPINB3,BMP4,SFRP1,UCHL1,INPP5K,PTPN22,IL1B,LYN,DUSP14,BMP7,IRAK3,SPRED1,NUP62,CAV1,SORL1,NF1,APOE,PRKCD,GSTP1,GPS1	{[45.0,10525.0],[32.0,9356.0]}
GO_SYNAPTIC_VESICLE_LOCALIZATION	3.15922	3.11212e-11	CPLX1,NLGN3,STX19,SNAP25,SYN2,STXBP5L,CDK5,CHRNA6,VPS18,CALM3,STX11,SYP,NLGN2,PIP5K1C,ERC2,VAMP2,AP3B2,SV2A,RAP1B,ATP2A2,DNM1L,RIMS1,DNM2,GSK3B,CHRNA4,APBA2,OTOF,CHRM2,PSEN1,CACNB2,CHRNB2,SCRIB,PRKCG,DTNBP1,RAB27A,STX1A,STX3,SNCA,UNC13A,P2RY1,P2RX7,DOC2A,UNC13C,CACNA1D,NCS1,BACE1,SLC2A4,SYT1,AP3S2,PRRT2,BLOC1S6,PREPL,P2RX1,KIF5A,PICALM,PRKN,TRIM9,CASK,UNC13B,PRKCB,ADRA1A,GRIK5,NAPB,PTEN,TRIM46,MA…	{[127.0,10443.0],[36.0,9352.0]}
GO_PHENOL_CONTAINING_COMPOUND_METABOLIC_PROCESS	4.45722	7.76274e-07	CHRNB2,SLC6A3,BTBD9,RTL4,LRTOMT,SNCA,ITGAM,GPR37,ATP7A,AOC2,NPR1,FOXE1,STAR,DUOXA1,DUOX1,EPAS1,PNKD,BCL2,SNCB,CRYM,DRD2,DRD4,DIO2,MED1,TG,TYRP1,SULT1B1,DRD3,ABAT,HTR1A,SLC5A5,SNCAIP,PRKN,COMT,TACR3,DRD1,DUOX2,SULT1A1,AKR1B1,GATA3,HPRT1,PDE1B,IYD,PAX8,NR4A2,MAOB,TPO,DUOXA2,GRIN2A,ITGB2	{[50.0,10520.0],[10.0,9378.0]}
GO_REGULATION_OF_ANTIGEN_RECEPTOR_MEDIATED_SIGNALING_PATHWAY	1.58554	0.0479577	PLCL2,FCGR2B,PAWR,CYLD,CCR7,ELF2,PTPRC,CEACAM1,BLK,PTPRJ,CD226,UBASH3A,PTPN6,FOXP1,PAX5,KCNN4,RAB29,ADA,BTN2A2,MALT1,RELA,NECTIN2,PHPT1,PRKCH,CACNA1F,STAP1,RUNX1,PTPN22,EZR,RC3H1,LYN,LGALS3,LCK,CD19,PRKD2,BCL10,PRNP,PRKCB,PTPN2,DUSP3,CD22	{[41.0,10529.0],[23.0,9365.0]}
GO_ESTABLISHMENT_OF_SPINDLE_ORIENTATION	1.68877	0.120592	NDE1,SPRY2,CLASP1,SPRY1,MAP4,LLGL1,SPDL1,DCTN1,HTT,GPSM2,NUMA1,ARHGEF2,PAFAH1B1,PAX6,CDK5RAP2,FGF10,MCPH1,LLGL2,BCCIP	{[19.0,10551.0],[10.0,9378.0]}
GO_METANEPHRIC_NEPHRON_MORPHOGENESIS	6.822	0.000138668	LIF,SIX2,SOX9,SALL1,PDGFRB,WNT9B,PAX2,LHX1,LGR4,SOX8,WT1,WNT4,BMP4,PKD2,KIF26B,PKD1,SMO,FMN1,PAX8,GDNF,GREM1,CTNNB1,STAT1	{[23.0,10547.0],[3.0,9385.0]}
GO_RESPONSE_TO_UV_C	1.01507	0.592319	YY1,MDM2,DCUN1D3,ERCC5,BRCA2,WRN,POLH,MAP3K4	{[8.0,10562.0],[7.0,9381.0]}
GO_CARBOHYDRATE_CATABOLIC_PROCESS	2.00669	4.64382e-06	ENO3,INSR,OGDH,AAAS,NDC1,NUP43,NUP160,HKDC1,SLC25A12,IGF1,NUP37,GALM,NUP188,PKM,MYOG,PGK1,GPI,ESRRB,NUP214,NUP62,NEU1,NCOR1,FUT7,GCKR,ALDOA,ALDOB,POM121,MGAM,PGAM4,LRP5,NAGA,PFKL,NEU3,NUP205,P2RX7,TREX1,GALK2,ZBTB7A,GUSB,MLXIPL,NEU2,PRKAA1,PYGL,PGM2,PRKAG3,ENO2,PPARA,PFKP,ACTN3,FBP1,KHK,BAD,NUP155,PKLR,AGL,DHDH,HK2,GPD2,PFKFB2,NUP133,DHTKD1,NUP93,POM121C,NUP107,PHKA1,PGM1,GK2,GCK,HIF1A,TREH,PRKAA…	{[128.0,10442.0],[57.0,9331.0]}
GO_DENTATE_GYRUS_DEVELOPMENT	1.95498	0.155024	PTEN,EMX2,LMX1A,BTG2,SMO,NEUROD1,LEF1,ATAT1,DRD1,FEZF2,CDK6	{[11.0,10559.0],[5.0,9383.0]}
GO_ESTABLISHMENT_OR_MAINTENANCE_OF_TRANSMEMBRANE_ELECTROCHEMICAL_GRADIENT	2.22159	0.131471	FXYD2,ATP1A2,ATP1A4,ATP4A,BAX,ATP12A,ATP1A3,ATP1A1,ATP1B1,SLC22A1	{[10.0,10560.0],[4.0,9384.0]}
GO_LABYRINTHINE_LAYER_DEVELOPMENT	1.89749	0.0255038	GCM1,AKT1,BMP5,BIRC6,HEY2,CASP8,GRHL2,PCDH12,CCN1,IL10,NCOA1,LEF1,ST14,DNAJB6,SOCS3,NSDHL,HS6ST1,MAP2K1,ZFP36L1,FZD5,MAPK1,BMP7,HEY1,GGNBP2,SPINT2,EGLN1,RBPJ,PLCD3,CDX2,PLCD1,WNT7B,FGFR2	{[32.0,10538.0],[15.0,9373.0]}
GO_N_TERMINAL_PROTEIN_AMINO_ACID_ACETYLATION	2.88889	0.0421559	NAA35,NAA10,EP300,NAA30,NAA16,NAA25,AANAT,NAA15,KAT2B,SOX4,NAA20,NAA40,CREBBP	{[13.0,10557.0],[4.0,9384.0]}
GO_CERAMIDE_CATABOLIC_PROCESS	3.55657	0.0119694	GALC,ASAH1,NAGA,GBA2,ASAH2,NEU3,GBA,GM2A,ACER3,NEU2,GLA,HEXB,PRKCD,NEU4,NEU1,PSAP	{[16.0,10554.0],[4.0,9384.0]}
GO_EXCRETION	3.37428	8.04396e-06	UGT1A7,CHRNB2,KCNK5,NEDD4L,SNX5,CLCNKA,ATP6V1B1,CORIN,NPR1,AQP2,AQP7,HMOX1,AVPR2,AGTR2,KCNMA1,ADORA1,SLC22A18,SCNN1B,TRPV1,GRHPR,DRD2,AGTR1,CLCN5,PSAP,DRD3,NPHP1,NPHS1,ABCG8,AVP,CLCNKB,NPHS2,AGT,AQP5,ABCG5,ATP6V0A4,UMOD,EDNRB,GNAI2,COMT,AVPR1A,SLC26A3,EDN1,CLDN16,SCNN1G,POU3F3,ADRA1A,CHRNA3,NFAT5,KCNJ1,AMN,SLC9A3R1,MLLT6,CHRNB4	{[53.0,10517.0],[14.0,9374.0]}
GO_DIGESTION	2.14199	1.9452e-05	SLC5A1,FABP1,APOA4,NMU,VSIG1,SCARB1,FABP2,CTRB1,HAMP,SLC22A5,KCNN4,INAVA,KCNQ1,CCKBR,SLC2A2,AQP1,SLC9A4,DRD3,CAPN9,ABCG5,NEUROD1,PTGER3,OXTR,ADRA2A,FGF10,PRSS1,CYP39A1,PGA5,SERPINA3,AKR1D1,MGAM,TLR4,SOX9,COPA,SLC26A7,GUCY2C,CLPS,GHRL,MUC6,PNLIP,AKR1C2,MUC13,TYMP,PNLIPRP2,CHRM3,ASAH2,LEP,CD36,SLC26A6,WNK4,VIL1,TJP2,LIMA1,SLC46A1,TRPV1,SLC2A5,NR1H3,NPR3,RBP4,OPRK1,CHIA,APOA1,HIP1R,PRSS2,AQP5,PIR,WN…	{[96.0,10474.0],[40.0,9348.0]}
GO_POSITIVE_REGULATION_OF_SYNAPTIC_TRANSMISSION_GLUTAMATERGIC	6.45423	2.28146e-05	CACNG7,PTK2B,TNR,SHANK1,NLGN3,TSHZ3,STXBP1,CCR2,CACNG2,SHANK3,CACNG4,EGFR,GLUL,CACNG3,RELN,ADCYAP1,NLGN2,NLGN1,KMO,PTGS2,OXTR,NPS,NTRK1,DRD1,CUBN,SHANK2,NRXN1,RAB3GAP1,ROR2	{[29.0,10541.0],[4.0,9384.0]}
GO_POSITIVE_REGULATION_OF_MITOTIC_NUCLEAR_DIVISION	1.63822	0.0526742	LRP5,PDGFB,ESPL1,INSR,PHIP,SH2B1,BTC,INS,PDGFRB,IGF1,TGFB1,SLF2,HNRNPU,DRD3,NIPBL,CUL3,PHB2,IGF2,IL1A,EGF,DLGAP5,IL1B,NUMA1,RB1,NUP62,AURKA,DMRT1,EDN1,NEUROG1,FGF8,ANAPC5,NSMCE2,CDT1,SMC5,EDN3	{[35.0,10535.0],[19.0,9369.0]}
GO_HINDBRAIN_DEVELOPMENT	3.38572	1.48107e-11	OGDH,ABL1,TTBK2,UQCRQ,AHI1,PAK1,CDK5,CRKL,ARCN1,ASCL1,HOXB3,ZNF365,LRP6,GPR37L1,PTF1A,KNDC1,RERE,NEUROD1,DAB1,RORA,PTPRS,PHOX2B,MT-ND4,WHRN,FOXP2,PSEN1,SCRIB,FCGR2B,LMX1A,EN1,ATIC,LHX1,OPHN1,KDM2B,ALDH1A2,NCOA1,CDK5R2,ABAT,EN2,CLP1,SPTBN2,MYH10,HOXB1,FLNA,KCNC1,SEMA4C,FZD4,LDB1,NEUROD2,NANOS1,GRID2,EZH2,GATA2,CDK5R1,HAP1,GLI2,AARS,NFIB,KIF14,CEP290,ATP7A,SSTR3,DLL1,ATRN,BCL2,NOG,MAP2K1,PLXNA2,EGF…	{[121.0,10449.0],[32.0,9356.0]}
GO_OLIGOSACCHARIDE_METABOLIC_PROCESS	2.07383	0.0950696	NAGA,MOGS,TREH,ST8SIA6,ST3GAL6,IDUA,NEU2,ST8SIA2,MAN1B1,GAL3ST4,BRAF,MGAM,GLA,GAA	{[14.0,10556.0],[6.0,9382.0]}
GO_NEGATIVE_REGULATION_OF_DENDRITIC_SPINE_DEVELOPMENT	4.44413	0.0309924	PTPRS,PTEN,EFNA1,NLGN1,NGEF,DNM3,PLK2,ASAP1,NLGN3,HDAC2	{[10.0,10560.0],[2.0,9386.0]}
GO_MODULATION_OF_GROWTH_OF_SYMBIONT_INVOLVED_IN_INTERACTION_WITH_HOST	inf	7.2001e-05	IRF8,TNF,ELANE,SQSTM1,TIRAP,MBL2,IL12B,IL10,LBP,LTA,MPO,CD36,OSBP,CTSG,CAMP	{[15.0,10555.0],[0.0,9388.0]}
GO_CHROMOSOME_SEGREGATION	1.38218	0.00293757	RNF212,SYCE1,RMI1,PDS5A,NDC1,SMARCAD1,NUP43,MAD1L1,CHMP4C,POGZ,APC,NUP37,ESCO2,PLK1,KIF22,UBE2I,NCAPG,NR3C1,UVRAG,DUSP1,SLF2,KIF4B,CDC42,BRIP1,SYCE2,CHMP2B,NCAPD3,MAD2L2,WAPL,NIPBL,RAD51C,KNL1,MSTO1,TEX15,SMC1B,RAD18,FEN1,CSNK2A1,DLGAP5,SGO2,CDC23,BUB3,NUMA1,CHMP1A,NUP62,CHMP4B,SMC6,NCAPD2,MKI67,ANAPC5,FANCM,HJURP,ESPL1,REC8,NDE1,AKAP8,KATNB1,ARL8A,PIBF1,CDCA8,SMC1A,KIF2B,TRIP13,CDC6,SUN1,CDC27,N…	{[192.0,10378.0],[124.0,9264.0]}
GO_NEGATIVE_REGULATION_OF_CYCLIN_DEPENDENT_PROTEIN_KINASE_ACTIVITY	1.62963	0.114286	PTEN,TNFAIP3,LATS1,CDKN1B,APC,CASP3,MEN1,NR2F2,PLK1,CDKN2C,KAT2B,CDKN2B,FBXO7,MYOCD,INCA1,TFAP4,LATS2,CDKN1A,WEE2,CDKN2A,CDKN1C,CEBPA	{[22.0,10548.0],[12.0,9376.0]}
GO_ETHER_METABOLIC_PROCESS	0.761156	0.779265	ALOX12,TXN2,EPHX1,CYP2W1,EPHX2,AGMO	{[6.0,10564.0],[7.0,9381.0]}
GO_HEMATOPOIETIC_PROGENITOR_CELL_DIFFERENTIATION	1.83524	0.000141815	ABL1,TENT2,CDK6,NOTCH1,PSMA7,ESCO2,HERC6,PSMB4,SPI1,HOXB3,ACE,PRRC2C,JAM3,PTPRZ1,SFRP1,ARHGEF7,TCF3,PSMD9,ARL11,INHBA,PRKDC,PSMC4,SRF,SIPA1L3,PSEN1,LIG4,CIAO3,EIF2AK2,ZBTB1,PYGO1,TREX1,SOS1,PSMA8,MYB,AGPAT5,MEOX1,PUS7,PSMB8,BVES,PSMD6,FLT3,LDB1,PSMC2,DHTKD1,SSBP3,GATA3,GATA2,SIN3A,EEF2,PSMB9,FNIP1,PTPRC,NFE2L2,HYAL2,SETD1A,TP73,SLC7A6OS,STON2,YAP1,PSMD2,BCL2,KRT75,TGFB1,CSF1R,TAL1,ZBTB24,BMP4,KIT…	{[109.0,10461.0],[53.0,9335.0]}
GO_CYTOKINE_METABOLIC_PROCESS	3.03617	1.1073e-07	HSPB1,CYBB,IL6,TIA1,THBS1,TLR6,IL1A,IL1B,SFTPD,INHBA,TLR1,TNFRSF13C,CX3CR1,ZFPM1,AGER,TLR4,ZFP36,TRIB2,TIRAP,LBP,CCR2,SIGIRR,TNF,CARD9,CEBPG,GHRL,TYROBP,KLF4,MAP2K5,IL9,INHBB,NLRP12,INHA,TRAF6,CARD11,CD86,ELANE,GATA3,IRF7,CEBPE,INPP5D,PAWR,PTPRC,CD276,TICAM1,NOD1,PCSK5,IL27,RELA,GLMN,IL10,TLR3,IL1RAP,EGR1,ASB1,TLR8,TNFRSF8,STAT3,PTAFR,IL12B,IRF1,RNF128,FOXP3,IRF3,HMOX1,APP,NFKB1,TLR9,MAST2,TBK1,P…	{[85.0,10485.0],[25.0,9363.0]}
GO_NEGATIVE_REGULATION_OF_ERK1_AND_ERK2_CASCADE	1.58162	0.0349252	LIF,DUSP3,TLR4,PTEN,PTPRC,SPRY2,ABL1,PSCA,SPRY4,CRYBA1,SPRY1,FBLN1,CNKSR3,TIMP3,BTN2A2,SIRT3,DAB2IP,ARRB1,PIN1,PTPN1,WNK2,DUSP1,KLF4,DLG1,NLRP12,DUSP6,ADIPOQ,RANBP9,PHB,EZR,FLCN,LYN,ITGB1BP1,SPRED1,ATF3,SEMA6A,EPHB2,SIRPA,CHRNA10,CHRNA9,EMILIN1,SMAD4,RAPGEF1,SLC9A3R1,RPS6KA6,PTPN2,TNIP1,GSTP1	{[48.0,10522.0],[27.0,9361.0]}
GO_STEROID_BIOSYNTHETIC_PROCESS	2.52861	1.46164e-09	CYP2R1,MBTPS2,MBTPS1,APOA4,SCARB1,OSBPL3,CLCN2,GPAM,DHCR24,SIRT1,ERLIN2,SOD1,NSDHL,CES1,FDFT1,PRLR,CYP11B2,IL1B,OSBPL9,CYB5R3,TSPO,CYP39A1,APOB,CACNA1H,STARD4,APOE,ABCG1,CYP27A1,AKR1D1,GFI1,OSBPL2,FSHB,ACACA,HSD17B2,BAAT,FGF19,LHB,AKR1C3,FDXR,HSD3B2,TNF,HSD3B1,PRKAA1,MVK,SNAI2,SP1,PLPP6,HMGCR,PBX1,LSS,RDH8,CYB5R2,IFNG,BMP2,CYP11A1,ACACB,HSD17B14,DHCR7,ASAH1,HSD17B3,SRD5A3,CYP51A1,LEP,SRD5A2,FAXDC…	{[144.0,10426.0],[51.0,9337.0]}
GO_SODIUM_INDEPENDENT_ORGANIC_ANION_TRANSPORT	2.66641	0.062556	SLCO1A2,SLC22A9,SLCO2B1,SLCO1B7,SLCO1C1,SLC16A2,SLCO4A1,SLC22A6,SLCO1B1,SLCO1B3,SLCO4C1,SLCO2A1	{[12.0,10558.0],[4.0,9384.0]}
GO_REGULATION_OF_PROTEIN_TYROSINE_KINASE_ACTIVITY	2.12455	0.000602789	PDGFB,ERCC6,PTPRC,EFNA1,NCF1,DOK7,HYAL2,FBXW7,EPHA4,DVL2,ADAM17,NRG1,DLG3,ZFYVE28,APP,DOCK3,ADORA1,GREM1,GHRL,IBTK,ZGPAT,DLG4,PTPN1,SH3BP5,CSF1R,CBLC,ACE,TAL1,TSG101,PTK6,WNT3A,BDNF,UNC119,NEDD9,STAP1,RELN,AGT,EGF,CBL,CCL5,VPS25,GPRC5A,GGNBP2,ADRA2A,LRP8,CBLB,SRCIN1,NOX4,NTRK2,RACK1,ERBB3,PRNP,SOCS4,SRC,CD24,CAV1,ABI1,ADRA1A,PTPN2,PSEN1,NCAPG2,GRM5	{[62.0,10508.0],[26.0,9362.0]}
GO_DNA_TEMPLATED_TRANSCRIPTION_ELONGATION	0.971809	0.597546	NELFB,ERCC6,MLLT1,TAF1C,ERCC3,TEFM,GTF2H5,TAF1A,ELOA,CTR9,GTF2H3,SSRP1,CD3EAP,CDK9,POLR1C,ZNF326,GTF2H4,CCAR2,ELP3,CDK12,AFF4,POLR1A,POLR2C,PBRM1,CCNH,SOX10,CCNK,HNRNPU,BRD4,CDK13,ELP2,UBTF,ERCC2,SHH,ELL2,SUPT16H,SETD2,ZMYND11,POLR1E,LDB1,RNF8,DDX39B,RNF168,RECQL5,RTF1,HTATSF1,NCBP1,EZH2,POLR2A,SUPT5H,ELL,ELP1,EAPP,CDC73,TBP,LEO1,TSFM,ADRM1	{[58.0,10512.0],[53.0,9335.0]}
GO_N_GLYCAN_PROCESSING	0.777005	0.772633	GANAB,GNPTAB,MGAT4B,ST8SIA2,MAN1B1,PRKCSH,FUT8	{[7.0,10563.0],[8.0,9380.0]}
GO_ENDOPLASMIC_RETICULUM_TO_CYTOSOL_TRANSPORT	0.574258	0.949714	BRSK2,BCAP31,HSP90B1,SYVN1,SEC61B,SEL1L,FAF2,VCP,EDEM1,AUP1,EDEM2	{[11.0,10559.0],[17.0,9371.0]}
GO_NEGATIVE_REGULATION_OF_REPRODUCTIVE_PROCESS	2.61202	0.000534053	LIF,SEMG2,PAEP,CDKN1B,GPR149,NPR2,TRIP13,ZP3,PRKACB,IGF1,ZFPM2,SEMG1,ADA,NKX3-1,WNT5A,DUSP1,SERPINF1,STK11,SULF1,HPGDS,WT1,WNT4,BMP4,ZP4,AMH,OVOL1,BMP7,TTK,TIMP1,WEE2,RGN,OVGP1,NPPC,DMRT1,ZP2,NODAL,HORMAD1,FBXO43,ACVR1C,PRKAR1A,SNAI1,ASTL,CALR,NR5A1	{[44.0,10526.0],[15.0,9373.0]}
GO_G_PROTEIN_COUPLED_PURINERGIC_RECEPTOR_SIGNALING_PATHWAY	0.888047	0.690458	ADA,ADORA1,ADORA3,CNTN2,ACPP,PTAFR,ADCY5,P2RY12,GNAI2,P2RY1,P2RY2,P2RY11	{[12.0,10558.0],[12.0,9376.0]}
GO_MEMBRANE_DEPOLARIZATION	3.33465	2.88074e-07	CHRNB2,RANGRF,SCN10A,GPD1L,SCN1A,ANK2,SCN4A,CACNA1A,NEDD4L,FGF12,ABL1,SCN3A,PTPN3,KCNJ2,LRRK2,P2RX4,P2RX7,CACNG2,ALOX12,PPP2R3C,CACNA1D,BCL2,KDR,CAV3,SCN8A,MYOC,SCN1B,ATP1A2,CACNA1B,SLC8A1,PARP1,SCN11A,ABCD1,CHRNA6,CACNG4,CACNA1G,SCN2B,CACNA1I,CACNB4,CAMK2D,HCN2,CACNA2D1,FHL1,DCN,KCNH2,PARK7,SCN5A,SCN9A,SCN3B,SLMAP,TSPO,RACK1,GCLC,TRPM4,SCN4B,HCN4,EDN1,ANK3,CACNA1H,CACNB3,CAV1,SRC,CHRNA4,GOT1,GJA…	{[71.0,10499.0],[19.0,9369.0]}
GO_OLFACTORY_BULB_INTERNEURON_DIFFERENTIATION	2.66594	0.106022	ERBB4,ARX,DLX5,ROBO1,SALL1,SALL3,SLIT2,WNT5A,ROBO2	{[9.0,10561.0],[3.0,9385.0]}
GO_ATTACHMENT_OF_SPINDLE_MICROTUBULES_TO_KINETOCHORE	1.95597	0.0519342	BOD1,MAD1L1,APC,SGO1,ABRAXAS2,CDC42,SIRT2,HNRNPU,CENPE,KNL1,ZNF207,CCNB1,BUB3,AURKB,RB1,RCC2,NEK2,SPAG5,AURKC,CDT1,CHAMP1,TEX14	{[22.0,10548.0],[10.0,9378.0]}
GO_REGULATION_OF_LYASE_ACTIVITY	2.7509	0.00155146	GALR2,PALM,AKAP5,NOS2,GNAI3,FTMT,NOS3,CCR2,MTRR,CACNA1D,NOS1,NPR3,DRD5,AKAP9,PHPT1,GABBR2,GALR3,GRM3,GUCA1B,ORAI1,PARK7,EDNRB,GNAI2,ADGRV1,CRHR1,GUCA1A,STIM1,GALR1,TIMP2,NF1,NPFFR2,HPCA,CACNA1C,FXN	{[34.0,10536.0],[11.0,9377.0]}
GO_RESPONSE_TO_NITROGEN_COMPOUND	2.18518	5.45805e-30	COL6A1,INSR,CACNA1A,NLRP1,CASP3,SLC6A1,CAV3,CRKL,ATP6V0A1,SIRT1,EEF2K,SPARC,KCNQ1,DRD5,IRS2,SFRP1,HCN2,ZFP36L1,JAK2,ADCY6,GLRA1,VAMP2,CDKN1A,MARS,EDNRB,OXTR,CYBA,FOXO3,NTRK2,AACS,P2RY11,PQBP1,CYC1,ATP6V0C,DBH,HDAC5,CHRNB2,GRB10,AGRN,SLC9A1,AGER,SNCA,SOCS1,GLDC,GNAO1,MTR,P2RX7,GLP1R,MEN1,TREX1,PIK3R1,ADCY8,KCNJ8,CDC6,MGMT,DDX11,PRKAA1,KLF5,CACNA1B,GSTM3,CD9,PDPK1,PPARA,COL1A1,PRKACG,GNAI2,PRKN,PKL…	{[686.0,9884.0],[289.0,9099.0]}
GO_NEGATIVE_REGULATION_OF_TRANSMEMBRANE_TRANSPORT	1.60334	0.00651602	GNB5,AKT2,THADA,APPL2,HAMP,CAV3,ATP1A2,THBS1,REM1,CALM3,KCNE4,DRD3,IRS2,TWIST1,SRI,KCNH2,IL1B,ADRA2A,MTNR1B,EPHB2,OSR1,NEDD4,KCNE5,SLC26A5,GRB10,GPR35,GOPC,KCNE2,TNF,ENPP1,BIN1,RRAD,DRD4,STXBP3,CASQ2,COMMD1,LEP,PRKCB,CALM2,PLN,KCNE3,AKT1,PTEN,MTOR,NEDD4L,MMP9,ATP7A,HECW1,TGFB1,GSTO1,PCSK9,SESTD1,KCNAB1,CRBN,CLIC2,OPRL1,HECW2,ANK3,KCNE1,CAV1,SLC9A3R1,PKD2,KEL,EPO,FGF12,TLR9,CALM1,RGS2,DRD2,DYSF,CA…	{[81.0,10489.0],[45.0,9343.0]}
GO_REGULATION_OF_DNA_RECOMBINATION	1.27035	0.137782	FOXP3,MSH6,PTPRC,HIST1H1C,PRDM9,HIST1H1E,WRAP53,CHEK1,RIF1,RTEL1,SMARCAD1,MSH3,TFRC,UBE2B,TNFSF13,TERF2,WRN,UNG,KLHL15,CLCF1,FUS,TIMELESS,FANCB,BCL6,EXOSC3,ATAD5,USP51,SMCHD1,KPNA1,CD40,PARP1,IL7R,TGFB1,IL10,TP53BP1,ZNF365,KDM1A,NSD2,MAD2L2,TEX15,HELB,MSH2,ERCC2,POLQ,TBX21,SETD2,MLH1,IL27RA,TERF2IP,WAS,RECQL5,BLM,FBH1,SPIDR,ZSCAN4,RAD51,MRE11,RAD50,PRDM7,ZRANB3	{[60.0,10510.0],[42.0,9346.0]}
GO_REGULATION_OF_LEUKOCYTE_PROLIFERATION	2.10202	1.23645e-07	VAV3,IL13,CTLA4,MAD1L1,RAC2,CASP3,IGF1,GPNMB,GPAM,MAPK8IP1,MPL,BCL6,BTN2A2,IL6,ZBTB7B,CLECL1,IRS2,BTK,ZP4,CD320,IL1B,FGF10,PTH,SFTPD,TNFRSF13C,IL23R,IHH,CD40LG,CD24,IL20RB,TNFSF18,PKN1,ZNF335,DNAJA3,VSIG4,GSTP1,AGER,CHRNB2,TLR4,FCGR2B,TIRAP,KITLG,NCK1,IL6R,LILRB2,IL12RB1,TFRC,ZP3,IL6ST,CCR2,ARG1,ATAD5,SOS1,CD1D,TYROBP,CD40,JAK3,WNT3A,PYCARD,DLG5,VCAM1,GAL,MEF2C,CD46,RC3H1,TRAF6,ICOSLG,SPTA1,CARD1…	{[155.0,10415.0],[66.0,9322.0]}
GO_RESPONSE_TO_ETHANOL	3.83942	2.9463e-11	TRH,PTK2B,CD27,IL13,HAMP,ACTC1,CYBB,SPI1,SPARC,SOD1,TBXA2R,NQO1,USP46,GLRA1,GGH,AACS,PTH,CYP2E1,MT-ND4,CD14,SETDB1,GSTP1,DBH,CHRNB2,TUFM,TH,CA3,ADH7,GRIN2B,MGMT,PRKAA1,HTR3A,DRD4,HMGCR,SLC2A4,EPS8,ABAT,VCAM1,MT-CYB,CBL,HPGD,ITPR2,BAD,NPPC,CDO1,GATA3,LEP,EEF2,CAT,GOT2,MSTN,DNMT3A,SLC6A3,RPL10A,PTEN,PEMT,STAR,GNRH1,CNR1,ICAM1,RBP4,HDAC2,OPRK1,RHOA,RARA,DMAP1,KCNMB1,OXCT1,STAT3,GRIN2A,FGFR2,HTR1B,PE…	{[103.0,10467.0],[24.0,9364.0]}
GO_SULFUR_COMPOUND_METABOLIC_PROCESS	1.68338	0.000227739	ACSL6,SULT1C3,OGDH,EGFLAM,ACOT6,SULT1E1,MCEE,GGT7,SUCLG1,GPAM,FAR1,GPX1,CHST3,DSEL,SULT1B1,PTGES,SOD1,GHR,CHSY1,ISCA2,DLST,MAT1A,DCN,ACSF2,GSTA2,ACSM2B,NFS1,DLD,ARSG,SLC25A10,AHCYL2,GSTA3,MTHFR,SULT4A1,BHMT,GSTP1,GGT5,OPLAH,GAMT,MMUT,GLO1,CIAO3,ACACA,HSPA9,MPST,BAAT,MTR,ACSM3,GLRX3,MTRR,MVK,ENPP1,GSTM3,GNMT,SULT2B1,ISCA1,CHST8,AHCY,NUBPL,PHGDH,CBS,PARK7,ACACB,SLC25A19,HMGCL,MLYCD,CPS1,CTNS,TPK1,S…	{[132.0,10438.0],[70.0,9318.0]}
GO_REGULATION_OF_CELL_CYCLE_CHECKPOINT	1.06592	0.498222	XRCC3,CRY1,USP44,MAD2L1,TPR,RFWD3,WDR76,RINT1,RPA4,CCNB1,CHEK2,RNASEH2B,DUSP1,CDT1,CDK5RAP2,GEN1,DDX39B,CCAR2	{[18.0,10552.0],[15.0,9373.0]}
GO_NEGATIVE_REGULATION_OF_TRANSCRIPTION_REGULATORY_REGION_DNA_BINDING	2.66689	0.0377593	GATA1,SOX11,TAF1,SRI,MSX1,FBXW7,PER2,HEY2,MSX2,LHX2,SIN3A,HEY1,PSEN1,HAND1,MAD2L2	{[15.0,10555.0],[5.0,9383.0]}
GO_POSITIVE_REGULATION_OF_DNA_REPLICATION	2.10203	0.0244839	DHX9,ATF1,HRAS,PCNA,TNFAIP1,ATAD5,INO80,CDC7,GLI1,EGFR,DNA2,STN1,FGF10,ATRX,DBF4B,E2F8,WIZ,RECQL4,CDK1,FGFR1,GLI2,MAP2K4,CDK2,CTC1,CDT1,RAC1	{[26.0,10544.0],[11.0,9377.0]}
GO_NEGATIVE_REGULATION_OF_NEURON_APOPTOTIC_PROCESS	2.26446	1.62989e-06	RASA1,PTK2B,HRAS,FGF20,STAMBP,TYRO3,NES,ARRB1,NTF3,SOD1,BDNF,JAK2,GPI,GRIK2,SIX1,NTRK2,MTNR1B,CHL1,CX3CR1,APOE,MAP2K4,TFAP2B,GABRA5,SOD2,PSEN1,TGFB3,FZD9,LIG4,PRKCG,SNCA,EN1,ROCK1,KDM2B,PPT1,PIN1,SYNGAP1,ANGPT1,LGMN,PDPK1,EN2,CRLF1,TFAP2D,MEF2C,PARK7,MSH2,BAX,UNC5B,PRKN,AMBRA1,FGF8,HYOU1,XRCC2,AARS,HIF1A,CLN3,STXBP1,KIF14,STAR,F2R,GABRB3,BCL2,CNTFR,SNCB,GDF5,ISL1,CX3CL1,CORO1A,RETREG1,RHOA,KRAS,G…	{[109.0,10461.0],[43.0,9345.0]}
GO_POSITIVE_REGULATION_OF_REPRODUCTIVE_PROCESS	3.62707	6.55416e-07	YTHDC2,SRY,CFAP69,CDC25C,CITED2,PRDM14,SOX9,INSR,PRDM9,UBE2B,PDE3A,P2RY1,ZP3,SMURF2,ZFPM2,LFNG,CTNNB1,MSX2,WNT5A,CCDC87,VIP,SIRT2,ACVR1B,TOPAZ1,INHBB,HDAC2,WT1,WNT4,RETN,SEMA3A,MAPK15,ZP4,MSX1,CDC25A,GLRA1,AGO2,AR,SHH,HDAC4,EDNRB,OVOL1,DEFB1,OXTR,PLB1,PLCB1,TACR3,PDE5A,SYDE1,INHBA,AURKA,LHFPL2,NR5A1,DMRT1,CACNA1H,PTAFR,CIB1,SRC,PRSS37,C1QBP,PRDM7,PGAM4	{[61.0,10509.0],[15.0,9373.0]}
GO_POSITIVE_REGULATION_OF_METANEPHROS_DEVELOPMENT	11.5592	0.00182964	LIF,ADIPOQ,PAX2,PDGFB,AGTR2,PAX8,BASP1,EGR1,GDNF,MYC,PDGFRB,RET,WT1	{[13.0,10557.0],[1.0,9387.0]}
GO_POSITIVE_REGULATION_OF_LYMPHOCYTE_APOPTOTIC_PROCESS	1.39611	0.325926	CCL5,TP53,IL10,PDCD1,BAX,WNT5A,CD274,FNIP1,P2RX7,LGALS13,IDO1	{[11.0,10559.0],[7.0,9381.0]}
GO_NUCLEOTIDE_PHOSPHORYLATION	0.807249	0.761179	CMPK2,AK7,NME3,NME7,AK9,CMPK1,NME1,PNKP,AK1,SUCLG1	{[10.0,10560.0],[11.0,9377.0]}
GO_POSITIVE_REGULATION_OF_GENE_EXPRESSION_EPIGENETIC	1.11882	0.380572	HIST1H1C,EP300,ERCC6,AICDA,HIST1H1E,ACTB,CHEK1,PADI2,CD3EAP,TAF1C,TAF1A,POLR1C,MYBBP1A,ARID1B,HMGA1,PHF2,TET1,POLR1A,ARID1A,SF3B1,KAT2B,KMT2B,ATAD2,BAZ1B,PHF8,MYO1C,POLR1E,WBP2,ATAD2B,PABPC1L,TBP,SMARCD1,CTNNB1,SMARCA5	{[34.0,10536.0],[27.0,9361.0]}
GO_GLUTAMATE_SECRETION	2.37262	0.00585471	TRH,STX1A,CPLX1,SNCA,STXBP1,SNAP25,P2RX7,PPFIA1,SLC1A2,GLS2,ADORA1,SLC1A1,TRPV1,GRM7,PPFIA4,SYT1,GIPC1,AVP,GLS,SLC1A3,SLC17A7,VAMP2,KMO,HRH3,NTRK2,UNC13B,AVPR1A,RIMS1,NF1,TSPOAP1,RAB3GAP1,APBA1	{[32.0,10538.0],[12.0,9376.0]}
GO_POSITIVE_REGULATION_OF_PROTEIN_BINDING	3.05919	9.0425e-07	NMD3,PLCL2,EP300,TIRAP,RAN,TAF1,TICAM1,MMP9,USP33,PPP2CA,ABL1,RAPGEF2,EPHA4,HFE,B2M,LRRK2,MEN1,APP,LFNG,BAMBI,CDK5,ARRB1,RFNG,PIN1,RPL11,PLK2,HOXA3,GNL3L,MARK3,ADD1,NVL,DACT1,ACE,WNT5A,VTN,AKTIP,WNT3A,BDNF,TMEM173,HIP1R,STK4,BMP4,ARHGEF7,TIAM1,MAPRE1,PKD1,MEF2C,PARK7,BMP2,LGALS3,PRKN,CTHRC1,SPTA1,SPPL3,CRBN,TCF7L2,TRIB3,ADD2,CAPRIN2,RIPK2,PLXND1,TERT,EPB41,CAV1,GSK3B,APOE,NRP1,FLOT1,PSEN1,AMFR,LR…	{[72.0,10498.0],[21.0,9367.0]}
GO_REGULATION_OF_VASCULOGENESIS	1.59922	0.28262	CEACAM1,KDR,HEY2,RAP1A,HIF1AN,XDH,RAPGEF2,HEY1,EMP2	{[9.0,10561.0],[5.0,9383.0]}
GO_LENS_FIBER_CELL_DIFFERENTIATION	3.70713	0.00131644	KDM5B,ABI2,CDKN1B,FOXE3,ZEB2,EPHA2,SMAD3,CRYGB,VIM,BFSP2,TGFB1,PITX3,SIX3,CRYGD,NF2,MAF,WNT7A,TBC1D20,TDRD7,SKIL,CDKN1C,NTRK3,BFSP1,PROX2,WNT7B	{[25.0,10545.0],[6.0,9382.0]}
GO_SENSORY_PERCEPTION	0.979886	0.633615	TAS2R3,COL4A3,SCN1A,OR10Q1,OR52N5,SPRY2,SHANK1,MKKS,KERA,CASP3,TAS2R16,GJA3,RDH12,OTOA,GABRR2,CABP4,SLC24A1,KCNQ1,RGR,LAMC3,OR4M1,NIPBL,GUCA1B,OR10G4,TAS2R46,GLRA1,TRPM5,TRPM8,EDNRB,RORB,RIMS1,CHRNA9,WDR36,OR4C46,GABRA5,OR2J1,LRIG2,CHRNB2,SLC9A1,SCN10A,CNGA4,CRYBA1,P2RX7,CCR2,OR2J2,TIMP3,CLIC5,MYO3A,OR10J5,VAX2,PKD2L1,CACNA1F,ATP8A2,COL11A2,HOXA1,COL1A1,OR10Z1,HMCN1,KCND2,ESPN,TAS1R3,OR4C45,ATP8B…	{[508.0,10062.0],[460.0,8928.0]}
GO_HEPATICOBILIARY_SYSTEM_DEVELOPMENT	4.11954	3.84103e-13	GLI3,CITED2,FPGS,HLX,CEACAM1,HAMP,HNF4A,NOTCH1,DNAAF1,UPF2,PHF2,ARID5B,ZIC3,CPB2,NIPBL,PKM,JARID2,AACS,E2F8,PCK1,IHH,OTC,SOX9,PNPT1,RPL19,MPST,BAAT,ARG1,ALDH1A2,CEBPG,WDR35,WNT3A,MKS1,MESP1,SEC63,RB1CC1,HGF,PKD1,LSR,ONECUT1,TGFBR3,GATA6,HMGCL,AURKA,XBP1,ACAT1,EZH2,CPS1,HNF1A,COBL,PDX1,TNFAIP3,NKX2-8,ATP7A,RPS6KA1,PTPN3,SULF2,CIT,RARB,ACO2,FRZB,SMAD3,RELA,TGFB1,IL10,VTN,PCSK9,CAD,CCDC40,RARA,KRAS,…	{[115.0,10455.0],[25.0,9363.0]}
GO_FATTY_ACID_CATABOLIC_PROCESS	2.38889	2.8025e-05	SESN2,LONP2,AUH,IRS1,AKT1,PHYH,FABP1,AKT2,MMUT,ALDH3A2,MTOR,LIPE,HAO1,AMACR,CEL,MCEE,ACBD5,ACAD10,CRAT,PCCA,NUDT19,HACL1,MMAA,EHHADH,ECHS1,ACOX1,ABCD1,LPIN1,IVD,CPT1B,CNR1,PECR,ACADM,HADHA,ETFDH,HIBCH,CPT1A,CPT1C,PCCB,IRS2,PEX13,PPARA,DECR1,HADHB,PLA2G15,TWIST1,ADIPOQ,GCDH,CPT2,ACADL,SLC27A4,ACADVL,ECH1,ETFB,ETFA,ACACB,MECR,PCK1,MLYCD,HSD17B4,ACAT1,LEP,ACADS,LPIN2,FAAH,PCK2,MCAT,ECI1,HADH,ABCD3,P…	{[75.0,10495.0],[28.0,9360.0]}
GO_REGULATION_OF_VESICLE_FUSION	0.947306	0.630418	PRRT2,VPS11,CPLX1,AKT2,KIF5B,STXBP1,VPS16,VAMP1,TBC1D4,VPS18,SYT1,SYT9,TRIM9,GRIK5,CORO1A,SYT7	{[16.0,10554.0],[15.0,9373.0]}
GO_REGULATION_OF_LIPID_STORAGE	4.8353	9.1149e-06	TTC39B,NFKBIA,FBXW7,PLA2G10,ITGB3,SCARB1,LPL,C3,TNF,NFKB1,ABHD5,ABCA1,IL6,SIRT1,MEST,EHD1,NR1H3,FITM2,OSBPL8,CRP,VSTM2A,PPARA,CIDEA,ITGAV,MSR1,ACACB,ZC3H12A,PNPLA2,PPARG,APOC4,FTO,APOB,LEP,PTPN2,CD36,ABCG1,SREBF2,IKBKE	{[38.0,10532.0],[7.0,9381.0]}
GO_CARBOHYDRATE_TRANSPORT	1.64557	0.00216879	C1QTNF2,SLC5A1,AKT2,INSR,SLC5A10,APPL2,AQP7,IGF1,SLC2A10,SLC37A3,SLC5A4,SLC2A2,AQP1,IRS2,SLC45A3,IL1B,MFSD12,RFT1,PTH,SLC35A5,FFAR4,SORBS1,SLC26A5,GRB10,SESN2,SORT1,SLC35C1,RNASEL,GPC3,FGF19,PIK3R1,TNF,ENPP1,SLC2A4,SLC17A5,STXBP3,SLC5A2,SLC2A9,HK2,APPL1,CREBL2,SLC23A2,LEP,CLIP3,PRKCB,HNF1A,CAPN10,GIP,SLC35A2,SLC35A3,SLC45A1,IRS1,AKT1,SLC26A6,SLC45A4,NFE2L2,VIL1,INS,SLC5A11,AQP2,SLC1A2,YES1,SLC2A5…	{[96.0,10474.0],[52.0,9336.0]}
GO_REGULATION_OF_CELLULAR_RESPONSE_TO_GROWTH_FACTOR_STIMULUS	1.80021	1.09089e-06	SKI,CITED2,PRDM14,UBC,SPRY2,BMPER,DAB2,ABL1,GDF2,PPP2R5B,VEGFA,SPRY1,CREBBP,SOST,NOTCH1,SMOC2,BAMBI,CAV3,DAB2IP,SIRT1,NPNT,CDKN2B,SMAD2,THBS1,NTF3,FERMT1,CYFIP2,ZEB1,FGFBP1,FUZ,ITGA8,SFRP1,MSX1,DCN,IL1B,NUMA1,XDH,FGF10,LEMD2,SKIL,ADAMTS3,DNM2,EMILIN1,NEDD4,PRDM16,TFAP2B,GDF3,HHIP,SMAD7,BMPR2,TGFB3,LEMD3,CHRDL1,GATA4,GRB10,NEO1,XIAP,ZNF423,SPRY4,GPC3,ITGA3,LTBP1,SMURF2,SPRY3,FKBP8,MEN1,ZBTB7A,NPTN…	{[193.0,10377.0],[96.0,9292.0]}
GO_EMBRYONIC_HEMOPOIESIS	5.33643	0.00177523	HIF1A,GATA1,STK4,GATA3,ZFPM1,KITLG,KDR,KMT2A,GATA2,IL3,TPO,KIT,TAL1,MED1,VEGFA,SH2B3,TGFBR2,PBX1	{[18.0,10552.0],[3.0,9385.0]}
GO_EMBRYO_DEVELOPMENT_ENDING_IN_BIRTH_OR_EGG_HATCHING	2.57505	1.43952e-27	KBTBD8,HEY2,CELSR1,CDX1,PRRX1,ACTL6A,HEG1,DSC3,BHLHE40,TBX15,UBE2A,LIAS,IFT122,SMAD2,MMP14,NIPBL,RBBP8,SFRP1,ZFP36L1,CTHRC1,SPINT2,OSR1,MT-ND4,SRF,SHROOM3,SCRIB,HYAL1,PDGFB,TRAF3IP1,ZMIZ1,NKX2-6,MEOX1,HOXD1,SUFU,CCN1,WNT3A,HOXA1,COL1A1,CCNB1,PHGDH,BMP2,C6,GATA3,RRN3,NOLC1,ATP6AP2,PEMT,IFT57,SULF2,MMP16,SFRP2,WNT9A,ENDOG,IFT52,SATB2,GLMN,GPR161,PYGO2,STK4,HES7,CHD8,PLCG1,RARA,PRICKLE1,TAPT1,BCOR,R…	{[460.0,10110.0],[163.0,9225.0]}
GO_ANTIGEN_PROCESSING_AND_PRESENTATION_OF_PEPTIDE_OR_POLYSACCHARIDE_ANTIGEN_VIA_MHC_CLASS_II	1.43735	0.0452585	DCTN2,FCGR2B,AP2M1,CTSD,AP1S1,DCTN5,KIF15,KIF3C,DYNC1LI2,KIF2B,HLA-DRB5,HLA-DPA1,HLA-DRB1,HLA-DOA,SEC31A,KIF11,OSBPL1A,AP2S1,KIF22,HLA-DPB1,SAR1B,KIF2A,KIF4B,THBS1,KLC2,CENPE,LGMN,DCTN1,SEC23A,PYCARD,HLA-DQA1,AP2A2,AP1S2,IFI30,KIF5A,SPTBN2,ARF1,CTSF,HLA-DMB,SEC24A,RAB7A,TRAF6,KIF4A,CANX,CAPZA1,KIF18A,SEC24D,CLTA,CTSE,AP1B1,DYNC1I2,DNM2,AP1G1,DYNC1H1,DCTN4,CLTC,KIFAP3,HLA-DQB1,AP2B1,HLA-DQB2,SEC24…	{[63.0,10507.0],[39.0,9349.0]}
GO_RESPONSE_TO_IONIZING_RADIATION	2.4125	4.42178e-07	ERCC1,CYP2R1,HRAS,GTF2H5,TP53,XRCC4,HAMP,CASP3,CLOCK,GPX1,SIRT1,EEF1D,TP53BP1,BABAM2,NIPBL,SFRP1,ABCG5,CDKN1A,BABAM1,MYC,CYBA,RNF8,PRKDC,RHNO1,SPIDR,CRYAB,DNM2,CHEK2,RAD51,LIG4,DCLRE1C,UIMC1,MEN1,TREX1,PML,RAD9A,MGMT,PRKAA1,SNAI2,KAT5,NAMPT,STK11,KDM1A,RAD54L,TANK,VCAM1,HMGA2,CBL,MSH2,BAX,XRCC6,KARS,ELK1,GATA3,MDM2,INIP,BRCA2,XRCC2,NET1,DNMT3A,RAD9B,ERCC6,PTPRC,DCUN1D3,TLK2,STAR,ABRAXAS1,WRN,MTA1…	{[108.0,10462.0],[40.0,9348.0]}
GO_EPITHELIUM_DEVELOPMENT	2.09147	1.38381e-34	ARHGEF26,SPRY2,IL13,IRX3,HEY2,MKKS,CELSR1,VSIG1,FAT4,CDX1,GDF2,C1orf68,DLG3,DSC3,CASP3,TCF21,HEG1,SPRR1A,BHLHE40,KDR,ADAMTS16,CAV3,MST1,LIAS,NPNT,IFT122,ESRP1,SMAD2,SLC9A4,MMP14,DSPP,SFRP1,PGK1,ZFP36L1,TGM3,JAK2,PRSS8,CDKN1A,PSMD9,SHARPIN,CTHRC1,SPINT2,INHBA,DSC2,OSR1,SRF,BASP1,CD24,FLRT3,GDF11,CTSZ,SIPA1L3,SHROOM3,KRT5,KRTAP10-5,HRNR,DSP,GATA4,SCRIB,PDGFB,AFDN,TRAF3IP1,ABI2,NRG1,NKX2-6,RREB1,KRT…	{[885.0,9685.0],[393.0,8995.0]}
GO_POSITIVE_REGULATION_OF_SEQUESTERING_OF_CALCIUM_ION	1.62897	0.234787	CALM1,CASQ2,CLIC2,SRI,TRDN,TGFB1,RYR2,GSTO1,CALM2,CALM3,PKD2	{[11.0,10559.0],[6.0,9382.0]}
GO_SECONDARY_METABOLITE_BIOSYNTHETIC_PROCESS	2.33411	0.0261892	TYR,SLC24A5,RAPGEF2,MPST,ZEB2,CYP1A2,SP1,WNT5A,TYRP1,GIPC1,OCA2,CTH,CBS,TRPC1,APPL1,CDH3,SLC45A2,CTNS,PMEL,MC1R,MYO5A	{[21.0,10549.0],[8.0,9380.0]}
GO_CELL_MIGRATION_INVOLVED_IN_HEART_DEVELOPMENT	7.56003	0.000865448	NOTCH1,DCHS1,MESP1,BMP4,TWIST1,ENG,HAND2,FOLR1,PITX2,SNAI2,NDRG4,FLRT3,SEMA3C,BMP7,TBX5,PDGFRB,BVES	{[17.0,10553.0],[2.0,9386.0]}
GO_PROTEIN_LOCALIZATION_TO_CYTOSKELETON	3.11702	0.000144132	DCTN2,CEP83,PIBF1,MID2,TTBK2,HTR2A,MARK4,ABHD17A,APC,CEP131,HOOK3,GOLGB1,CSNK1D,PARD6A,DIAPH1,CEP250,KIAA0753,FAM83H,HNRNPU,PCM1,CEP192,MAPRE1,C2CD3,BBS4,NUMA1,ANLN,TTK,CRIPT,NUP62,MAP1A,MCPH1,KLHL21,DVL1,AURKA,MID1,GSK3B,MAPRE2,SPAG5,CCDC14,CHAMP1,SNX10,STIL	{[42.0,10528.0],[12.0,9376.0]}
GO_NUCLEAR_ENVELOPE_REASSEMBLY	2.31086	0.0788796	PPP2R1A,UBXN2A,REEP4,PPP2CA,CHMP4B,VPS4A,SPAST,EMD,CHMP2A,LMNA,ANKLE2,VRK1,BANF1	{[13.0,10557.0],[5.0,9383.0]}
GO_INTRINSIC_APOPTOTIC_SIGNALING_PATHWAY_IN_RESPONSE_TO_DNA_DAMAGE_BY_P53_CLASS_MEDIATOR	1.06596	0.47748	CDIP1,EP300,HNRNPK,TP53,BAG6,TP73,MUC1,PML,TOPORS,RPL26,ATAD5,BCL2,SIRT1,KDM1A,PYCARD,MSH2,ZNF385A,CD44,MIF,TAF9,USP28,CHEK2,TP63,BRCA2	{[24.0,10546.0],[20.0,9368.0]}
GO_REGULATION_OF_AUTOPHAGY	1.7502	1.02375e-06	TPCN1,HDAC6,ABL1,TBC1D25,ATP6V1B1,LAMP3,ATP6V0D2,HSPB1,CASP3,UVRAG,OPTN,KDR,CDK5,FYCO1,ATP6V0A1,SIRT1,ATP6V1H,TFEB,MAPT,CALCOCO2,TSC2,SNX32,EPM2A,CTSA,LZTS1,MCL1,LRSAM1,MTMR3,DCN,UBQLN2,IL10RA,SH3BP4,MTMR8,CHMP4B,RRAGC,TSPO,TAB2,DNM1L,NEDD4,SUPT5H,PIK3CB,ATP6V0C,GATA4,SESN2,NPC1,NPRL3,GBA,SNCA,ULK1,SNX5,GNAI3,TRIM22,VPS13D,ADRB2,DAPK3,TBC1D14,SPTLC2,ROCK1,PRKAA1,LARP1,LARS,CAMKK2,RUBCN,NAMPT,FBXO…	{[211.0,10359.0],[108.0,9280.0]}
GO_PHOSPHOLIPID_METABOLIC_PROCESS	1.59468	0.000173316	FGR,VAV3,PTK2B,GALR2,APOA4,PLA2G2A,PLPP1,MTMR2,EPHA8,DAB2IP,ANGPTL3,PIK3R3,CCKBR,PIGV,HADHB,AGPAT2,FDFT1,PLA2G4A,ENPP7,MTMR3,FGFR3,INPP5F,PIP5K1C,PLA2G4E,IMPA1,PI4K2A,PIGB,MTMR8,LGALS13,CD19,MBOAT7,PIGF,CETP,PIK3C2B,PIK3CB,PGAP3,PLCD1,INPP1,PNPLA6,PDGFB,SNCA,SOCS1,TEK,EFR3A,PLA2G12A,PIK3R1,AGPAT5,RUBCN,KLF4,TAZ,SOCS3,SMPD1,PLA2G15,INPP5J,LPCAT4,PLA2G5,FLT3,PAFAH1B1,GATA6,PIK3R4,FLT1,AMBRA1,PLA2G2…	{[166.0,10404.0],[93.0,9295.0]}
GO_AMMONIUM_ION_METABOLIC_PROCESS	1.11882	0.380572	PLA2G6,PON1,TRH,BTBD9,CLN3,APOA4,ATP7A,PLA2G10,DBI,PLA2G2A,PLA2G12A,LCAT,DMGDH,GPLD1,SMPD1,HTR1A,PLA2G4A,PLA2G7,LPCAT4,ENPP7,PLA2G5,BCHE,PLA2G4E,PAFAH1B1,PLB1,PLA2G2D,PDE1B,MECP2,CETP,GRIN2A,PNPLA8,APOA5,PNPLA6,PLA2G4C	{[34.0,10536.0],[27.0,9361.0]}
GO_REGULATION_OF_INTERLEUKIN_4_PRODUCTION	1.87661	0.0810073	FOXP3,HAVCR2,HLA-E,ZP3,CD83,PRKCQ,LEF1,IRF4,EPX,RARA,NLRP3,CD86,GATA3,SYK,CD40LG,IL20RB,ZFPM1,CD3E,IL33	{[19.0,10551.0],[9.0,9379.0]}
GO_NCRNA_CATABOLIC_PROCESS	1.40701	0.227469	PNPT1,TENT2,EXOSC5,EXOSC8,EXOSC3,SLFN14,DROSHA,EXOSC9,ZC3H12A,POP1,DIS3L,DIS3,SND1,PARN,SLFN13,DIS3L2,TUT4,EXOSC4,EXOSC2	{[19.0,10551.0],[12.0,9376.0]}
GO_REGULATION_OF_FAT_CELL_DIFFERENTIATION	1.43521	0.028032	ZBTB16,HDAC6,SULT1E1,ASXL2,HTR2C,IL6,SIRT1,ZBTB7B,ZFP36L2,RORC,ANKRD26,SFRP1,ZFP36L1,CCDC71L,E2F1,CREB1,RORA,FTO,ZBTB7C,TRPM4,PRDM16,GDF3,ZFPM1,LRP5,ZFP36,TRIB2,ASXL1,SORT1,PTPRQ,LGALS12,TNF,ENPP1,SNAI2,KLF5,WIF1,HNRNPU,VSTM2A,WNT3A,BMP2,ZC3H12A,CREBL2,GATA3,XBP1,LEP,GATA2,RUNX1T1,NR1D1,AKT1,MTOR,MMP11,INS,SFRP2,FRZB,SMAD3,TRPV4,TGFB1,MSX2,SIRT2,BBS12,TPH1,STK4,PTGS2,TRIB3,PPARG,TRIO,JAG1,SH3PXD2…	{[79.0,10491.0],[49.0,9339.0]}
GO_GLUTAMINE_FAMILY_AMINO_ACID_BIOSYNTHETIC_PROCESS	inf	2.01676e-05	GLUL,OAT,GLS,ASS1,ASL,GLS2,OTC,ALDH18A1,GLUD1,CPS1,NAGS,PYCR1,SLC1A3,GLUD2,PYCR2,PYCR3,SLC25A12	{[17.0,10553.0],[0.0,9388.0]}
GO_BUNDLE_OF_HIS_CELL_TO_PURKINJE_MYOCYTE_COMMUNICATION	inf	0.000136035	JUP,DSC2,RANGRF,SCN10A,TRPM4,PKP2,CACNA2D1,DSG2,SCN5A,GJA5,DSP,KCNA5,CTNNA3,TNNI3K	{[14.0,10556.0],[0.0,9388.0]}
GO_REGULATION_OF_CELL_MATURATION	5.63343	0.00107799	PPP2R1A,MTOR,KIF14,PAEP,NPR2,LRRK2,BCL2,OPA1,TBX6,RAC3,SIRT2,TRIM58,GAL,EDNRB,WEE2,AURKA,NPPC,BCL11A,RET	{[19.0,10551.0],[3.0,9385.0]}
GO_NEGATIVE_REGULATION_OF_CELL_DEVELOPMENT	3.0254	3.92042e-20	SKI,YY1,GLI3,DENND5A,NLGN3,DTX1,IRX3,SPOCK1,PTHLH,CNTN2,SEMA3E,APPL2,IGF1,NOTCH1,FBLN1,PAK1,ITM2C,HOOK3,CDK5,CAV3,OLIG2,MIB1,IL6,TRPC6,ASCL1,TBX6,PITX3,SIX3,POSTN,ZNF365,DRD3,GPR37L1,ADCY6,INPP5F,IL1B,ITGB1BP1,EDNRB,IDH2,FOXO3,DAB1,EIF4ENIF1,EPHB2,TSPO,PTPRS,PHOX2B,SEMA3F,GSK3B,APOE,EFNB2,SEMA4G,RTN4RL2,GDF11,NKX6-1,CTSZ,PSEN1,LRIG2,GFI1,SOX9,EFNA5,LMX1A,SPP1,EPHA4,SOX3,NOTCH3,NTN1,NRG1,TNN,SOX2,…	{[258.0,10312.0],[77.0,9311.0]}
GO_MAMMARY_GLAND_MORPHOGENESIS	4.96302	5.65362e-06	SCRIB,DDR1,LRP5,KDM5B,GLI3,IGFBP5,CCL11,LRP5L,NTN1,ARG1,PML,PTCH1,EPHA2,CAV3,TGFB1,MSX2,CSF1R,WNT5A,TBX2,VDR,MED1,FGFR2,LRP6,WNT4,PHB2,BMP4,NRG3,PGR,AR,BAX,FGF10,CSF1,CAPN1,CAV1,SRC,GLI2,TBX3,TGFBR2,ESR1	{[39.0,10531.0],[7.0,9381.0]}
GO_CELLULAR_PROTEIN_COMPLEX_DISASSEMBLY	0.854417	0.888569	ERAL1,SPTBN5,HDAC6,CLASP1,TTBK2,APC,NES,TRIM54,ASPH,CLASP2,UPF1,MRPL12,MRPL46,MRPL44,MICAL3,SPTAN1,MRPL43,DAP3,RDX,C12orf65,KIF19,VILL,ADD2,PTCD3,SH3GL1,APC2,MRPS15,MRPL15,MRPS5,KATNB1,LMOD3,WDR1,CAMSAP2,OXA1L,CARMIL2,MRPS16,KIF2B,GSPT2,MRPS7,SPTBN4,ABCE1,ADD1,PEX14,EPS8,MAP1B,MRPS35,GAK,SPTBN2,ARHGEF2,KIF18A,SPTA1,MAP1A,DMTN,F2RL1,KIF24,SWAP70,MID1,MRPS34,GFM2,NAV3,MRPS2,TRIOBP,NAPB,MRPL40,CAPG,…	{[106.0,10464.0],[110.0,9278.0]}
GO_URETER_DEVELOPMENT	13.3401	0.000580409	PAX2,LHX1,SOX8,FOXF1,GATA3,OSR1,BMP4,EMX2,SOX9,ALDH1A2,SHH,SIX1,NFIA,RET,NPHP3	{[15.0,10555.0],[1.0,9387.0]}
GO_BODY_MORPHOGENESIS	4.78935	2.50319e-06	SKI,EP300,RRAS,PDGFRA,ATP6AP2,CLASP1,STRA6,BRAF,GPC3,ASPH,CLASP2,GREM2,DLX5,CDON,ARID5B,TGFB1,IFT122,NOG,LEF1,DKK1,MAB21L2,LRP6,FUZ,NIPBL,COL1A1,CRISPLD2,MSX1,DAG1,TBX1,MMP2,SGPL1,PHLDB1,ANKRD11,GNAS,WNT3,SSBP3,IHH,MYH3,FLVCR1,RAB3GAP1,PAX9,TGFB3,PTPN11	{[43.0,10527.0],[8.0,9380.0]}
GO_SOMATIC_STEM_CELL_POPULATION_MAINTENANCE	2.02342	0.00321958	LIG4,TDGF1,SKI,SIX2,DPPA4,PRDM14,SALL1,SOX9,HNF1B,VANGL2,BRAF,BCL9L,SOX2,ZHX2,WNT9B,PAX2,FOXP1,YAP1,POLR2C,EPHA1,ZIC3,SPI1,ZFP36L2,SMAD2,FGF2,NOG,KLF4,FOXD3,SALL4,PBX1,SFRP1,POU5F1,RAF1,KIT,WNT7A,BMP7,BCL9,KLF10,FGF10,LDB1,STAT3,RBPJ,PAX8,GATA2,SMAD4,POLR2A,TP63,PRDM16,CDX2,SOX4	{[50.0,10520.0],[22.0,9366.0]}
GO_CYTOPLASMIC_MICROTUBULE_ORGANIZATION	2.73943	0.000630433	HOOK2,TUBGCP2,CHP1,TUBGCP4,CAMSAP2,CLASP1,CEP120,TUBGCP3,HOOK3,TUBGCP6,HOOK1,CAV3,TRPV4,TUBG1,MAPT,CAMSAP3,DLG1,CAMSAP1,WDR73,PCM1,TUBGCP5,TRDN,EZR,NUMA1,KIF19,CEP126,SPAST,IFT172,PAFAH1B1,RAB11A,CRIPT,CCDC88A,DVL1,SLAIN2,DST,CIB1,CCDC88C,DYNC1H1,KATNAL2,SLK	{[40.0,10530.0],[13.0,9375.0]}
GO_POSITIVE_REGULATION_OF_DNA_DAMAGE_RESPONSE_SIGNAL_TRANSDUCTION_BY_P53_CLASS_MEDIATOR	3.25899	0.0464179	PLA2R1,RPL26,DDX5,ANKRD1,MSX1,PYHIN1,ATR,SPRED2,ZNF385A,ATM,SPRED1	{[11.0,10559.0],[3.0,9385.0]}
GO_PROTEIN_ACTIVATION_CASCADE	11.5723	5.97277e-06	A2M,FGA,PRCP,FBLN1,F12,FGG,F9,KNG1,F13A1,SERPING1,GP1BB,GP1BA,F10,GP9,FGB,F8,TFPI,APOH,F7,F13B,SERPINC1,VWF,F2,KLKB1,C1QBP,F11	{[26.0,10544.0],[2.0,9386.0]}
GO_POSITIVE_REGULATION_OF_PHOSPHOLIPASE_ACTIVITY	3.08332	9.3023e-05	HRAS,PDGFRA,ARF4,ITK,HTR2A,PDGFRB,GNAQ,AVPR1B,CCN1,AGTR1,FGF2,NTF3,EGFR,PDPK1,BDNF,AGT,PLCG1,ABL2,ANG,FGFR3,PLA2G5,PLCB2,CCL5,GPR55,KIT,PLAA,P2RY12,APOC2,SELE,NTF4,NTRK2,HTR2B,AVPR1A,RASGRP4,FLT1,PTH,S1PR4,NTRK3,PTAFR,FGFR1,ADRA1A,HPCA,EDNRA,FGFR2,ESR1	{[45.0,10525.0],[13.0,9375.0]}
GO_NEGATIVE_REGULATION_OF_PEPTIDYL_TYROSINE_PHOSPHORYLATION	2.35205	0.00334151	PPP2R1A,PTPRC,SOCS1,PPP2CA,HYAL2,LRRK1,PIBF1,PTPN6,SEMA4D,SFRP2,ZFYVE28,IBTK,ZGPAT,SH3BP5,CBLC,PARP14,TSG101,PTK6,NTF3,SOCS3,SPINK1,NF2,SFRP1,INPP5F,CBL,VPS25,GPRC5A,GGNBP2,CBLB,SRCIN1,RACK1,DMTN,SOCS4,CAV1,PTPN2,PRKCD,PSEN1	{[37.0,10533.0],[14.0,9374.0]}
GO_REGULATION_OF_COLLATERAL_SPROUTING	5.03948	0.00290429	WNT3,PTPRS,EPHA7,FGF13,EFNA5,LPAR3,ULK2,IFRD1,SPP1,DCC,SPART,LRP1,NGF,SEMA4D,RND2,WNT3A,BDNF	{[17.0,10553.0],[3.0,9385.0]}
GO_ESTABLISHMENT_OR_MAINTENANCE_OF_MONOPOLAR_CELL_POLARITY	3.77921	0.0077028	OPHN1,SCRIB,FOXF1,PTK7,RHOA,GBF1,MSN,SLC9A3R1,WNT5A,CARMIL2,CAMSAP3,CDC42,MYO9A,FSCN1,SYNE4,LAMA1,MAP1B	{[17.0,10553.0],[4.0,9384.0]}
GO_NEURON_RECOGNITION	4.34218	1.61805e-05	NEXN,BSG,CNTN2,NTM,EPHA4,OPCML,DSCAM,TNN,FEZF2,CASP3,CELSR3,CNTN4,APP,MYPN,NPTN,PCDH12,ROBO4,ROBO1,GAP43,ARHGAP35,FOXG1,CNTN6,CNR1,TNFRSF21,NDN,SEMA3A,EFNB3,CNTNAP2,EPHA3,NRCAM,PALLD,EPHB2,DSCAML1,SEMA5A,CDK5R1,MEGF8,NRP1,ROBO2,ROBO3	{[39.0,10531.0],[8.0,9380.0]}
GO_NUCLEOSIDE_DIPHOSPHATE_METABOLIC_PROCESS	1.33283	0.2788	CMPK2,AK7,DLG2,NME3,NME7,AK9,MAGI3,BAD,CMPK1,TJP2,LRGUK,AMPD3,NME1,DLG1,CARD11,AK1,CASK,SUCLG1	{[18.0,10552.0],[12.0,9376.0]}
GO_MICROTUBULE_POLYMERIZATION_OR_DEPOLYMERIZATION	1.96606	0.000537268	RANGRF,MET,NDE1,SKA3,MAP2,CKAP5,TUBGCP2,KATNB1,SNCA,TUBGCP4,CDKN1B,HDAC6,CLASP1,ABL1,CAMSAP2,TTBK2,KIF2B,APC,TRIM54,TUBGCP3,PAK1,TUBGCP6,CLASP2,CAV3,CSNK1D,TRPV4,TUBG1,MAPT,NIN,KIF2A,CAMSAP3,AKAP9,CAMSAP1,DCTN1,SKA1,NCKAP5L,MAP1B,SPEF1,HSPA1B,CEP192,CENPJ,RANBP9,GOLGA2,INPP5J,TUBGCP5,ZNF207,MAPRE1,FGF13,NUMA1,KIF19,ARHGEF2,MAP7D3,PRUNE1,SPAST,KIF18A,TUBB4A,CDK5RAP2,MAP1A,CLIP1,DRG1,MID1,CRYAB,SLA…	{[75.0,10495.0],[34.0,9354.0]}
GO_RESPONSE_TO_AMMONIUM_ION	2.33096	4.67339e-06	PTK2B,ABL1,MT-ND6,CASP3,SLC6A1,CDK5,CRKL,GABRB1,PITX3,DRD5,DRD3,EFTUD2,GPI,HRH3,OXTR,GABRG2,DNM2,GNA11,CHRNA4,CHRM2,HDAC5,CHRNB2,PRKCG,AGRN,GRK2,SNCA,SDK1,SLC34A1,ADGRL3,GLDC,GNAO1,HOMER1,ADCY8,HTR3A,DRD4,CACNG4,ABAT,SMPD1,ATF4,TIAM1,GNAI2,PRKN,CHRM3,MDM2,CDK5R1,ATG7,SIN3A,CHRNA3,GOT2,DNMT3A,SLC6A3,AOC1,MTOR,LRRK2,GABRB3,GNAQ,RELA,CNR1,GNB1,SRR,HDAC2,OPRK1,CHRNA7,HRH4,DNMT3B,GABRA1,MAPK3,PTAFR,GA…	{[94.0,10476.0],[36.0,9352.0]}
GO_NEGATIVE_REGULATION_OF_PROTEOLYSIS	1.07835	0.259194	COL4A3,FABP1,CAST,CD27,TAF1,GAS1,SPOCK1,SERPINB7,RENBP,HDAC6,LAMP3,VEGFA,SERPINA6,DHCR24,CDK5,ARRB1,GPX1,UMODL1,NOP53,PI3,AQP1,THBS1,DNAJB6,CPB2,SERPING1,ARL6IP1,BST2,GPI,ITIH6,CSNK2A1,USP7,SPINT2,TFPI,SERPINA3,CRYAB,TIMP2,PROS1,TFAP2B,PLAT,CTSZ,PSEN1,SERPINA7,SERPINB11,LRIG2,PRKCG,A2M,SNCA,XIAP,GPC3,EPHA4,WFDC1,PML,OPHN1,PAX2,USP19,TIMP3,ROCK1,RPS6KA3,PZP,SMARCC1,SUFU,BIN1,LPA,KLF4,ANOS1,MAP2K5,…	{[194.0,10376.0],[160.0,9228.0]}
GO_PINOCYTOSIS	2.84495	0.0256223	AHSG,DOCK2,CARMIL1,ANKFY1,PPT1,SNX5,DNM2,MAPKAPK3,ACTN4,CAV1,STX1B,APPL1,NR1H3,APPL2,AXL,PYCARD	{[16.0,10554.0],[5.0,9383.0]}
GO_REGULATION_OF_EPITHELIAL_CELL_APOPTOTIC_PROCESS	1.78063	0.00652365	HLA-G,PDX1,ZFP36,CAST,TNFAIP3,WFS1,IL13,SORT1,MTOR,NFE2L2,PAK4,SERPINE1,ABL1,TEK,BRAF,HMOX1,AKR1C3,TNF,KDR,ITGA4,IL6,CD40,CAPN10,ARRB2,TIA1,ICAM1,FGG,THBS1,ANGPT1,KRIT1,PPARGC1A,PDPK1,MAPK7,ZFP36L1,PIAS4,JAK2,PLCG1,BAD,FGB,NEUROD1,TCF7L2,FOXO3,SCG2,FASLG,SEMA5A,CD248,GATA3,SFRP4,SRSF6,TERT,GSN,CD40LG,GATA2,COL18A1,SERPINB13,ANGPTL4,FGA,ANO6	{[58.0,10512.0],[29.0,9359.0]}
GO_PHOSPHATIDYLCHOLINE_METABOLIC_PROCESS	0.932449	0.648866	PLA2G6,PON1,APOA4,PLA2G10,DBI,PLA2G2A,PLA2G12A,LCAT,GPLD1,PLA2G4A,LPCAT4,PLA2G5,PLA2G4E,PLB1,PLA2G2D,MECP2,CETP,PNPLA8,APOA5,PNPLA6,PLA2G4C	{[21.0,10549.0],[20.0,9368.0]}
GO_LUNG_EPITHELIUM_DEVELOPMENT	3.11421	0.00189764	SOX9,IL13,NFIB,STRA6,ADAMTSL2,THRB,GRHL2,SPDEF,YAP1,ASCL1,MAP2K1,BMP4,THRA,AIMP2,PKD1,CREB1,SHH,FOXA1,FGF10,GATA6,RBPJ,SRSF6,NKX2-1,FOXP2,KLF2,WNT7B,FGFR2,TMEM38B	{[28.0,10542.0],[8.0,9380.0]}
GO_METENCEPHALON_DEVELOPMENT	3.61509	1.99828e-09	OGDH,ABL1,TTBK2,UQCRQ,PAK1,CDK5,CRKL,ARCN1,ASCL1,ZNF365,LRP6,PTF1A,KNDC1,RERE,NEUROD1,DAB1,RORA,PTPRS,MT-ND4,WHRN,FOXP2,PSEN1,SCRIB,FCGR2B,LMX1A,EN1,ATIC,LHX1,OPHN1,NCOA1,CDK5R2,ABAT,CLP1,SPTBN2,MYH10,HOXB1,KCNC1,SEMA4C,FZD4,LDB1,NEUROD2,NANOS1,GRID2,EZH2,CDK5R1,HAP1,GLI2,AARS,KIF14,ATP7A,SSTR3,DLL1,ATRN,BCL2,MAP2K1,SMO,GNPAT,MYO16,SEZ6,NLGN4X,SEC24B,PTPN11,HNRNPD,NAGLU,KLHL1,SDF4,XRCC1,AGTPBP1,R…	{[89.0,10481.0],[22.0,9366.0]}
GO_G_PROTEIN_COUPLED_PURINERGIC_NUCLEOTIDE_RECEPTOR_SIGNALING_PATHWAY	0.49319	0.941378	PTAFR,P2RY12,P2RY1,P2RY2,P2RY11	{[5.0,10565.0],[9.0,9379.0]}
GO_ACTIN_FILAMENT_BUNDLE_ORGANIZATION	1.98991	3.17154e-05	PTK2B,WNT11,BAIAP2L1,SHANK1,ARHGEF5,CLASP1,ABL1,MKKS,MARCKS,ARHGAP28,PAK1,CLASP2,ARRB1,ARAP1,CDC42,ACTN1,ZYX,AIF1L,RDX,SFRP1,ELN,ITGB1BP1,ADD2,SORBS1,SRF,ASAP3,TGFB3,SLC9A1,SYNPO,SHROOM1,LCP1,PPFIA1,PIK3R1,SHANK3,ROCK1,EPHA1,USH1C,ACTN4,ADD1,BAIAP2,EPS8,NF2,TACSTD2,SYNPO2L,FLNA,PRKN,FSCN1,ESPN,FSCN2,DMTN,SWAP70,TGFBR1,GPR65,SRC,ITGB5,RAPGEF3,PAWR,MTOR,VIL1,LIMA1,SMAD3,HSP90B1,ALMS1,CX3CL1,RND2,RF…	{[107.0,10463.0],[48.0,9340.0]}
GO_CELLULAR_RESPONSE_TO_VIRUS	1.49738	0.103103	DDX58,PENK,IRF3,LGALS8,BIRC3,GBF1,BCL2L11,ANKRD17,IFIH1,NOP53,RRP1B,CHUK,VWCE,RNF125,TMEM173,ARF1,BAD,GPATCH3,NLRX1,FMR1,IRGM,PUM1,ZC3H12A,DDX60,SEC14L1,DHX58,GSDME,TRIM6,MMP12,IKBKE,IRF7,C1QBP	{[32.0,10538.0],[19.0,9369.0]}
GO_CYTOPLASMIC_MRNA_PROCESSING_BODY_ASSEMBLY	1.18444	0.436265	LIMD1,PAN3,ATXN2L,PAN2,ATXN2,DYNC1H1,CNOT1,RC3H1,CNOT6,PATL2,LSM3,EDC3	{[12.0,10558.0],[9.0,9379.0]}
GO_RESPIRATORY_GASEOUS_EXCHANGE	2.91022	8.399e-05	NLGN3,TSHZ3,EDNRA,HNMT,PBX3,FUT8,CSF2RB,ZFAND5,CYSLTR1,GAA,ADORA1,SFTPA1,DACH1,ATP1A2,CHST11,JAG2,FLT4,GLS,TMPRSS11D,NDN,ELN,NLGN2,NLGN1,GLRA1,SFTPC,NDST1,SFTPD,GRIN1,PHOX2A,BPGM,FTO,ADH5,EDN1,PASK,NDUFA12,KDM6A,MAFB,MECP2,SFTPA2,UCP3,NR4A2,PHOX2B,CHRNA4,COX15,SFTPB,ECEL1,MTG2,TLX3,TNNC1	{[49.0,10521.0],[15.0,9373.0]}
GO_NEGATIVE_REGULATION_OF_PROTEIN_MODIFICATION_BY_SMALL_PROTEIN_CONJUGATION_OR_REMOVAL	1.50136	0.0418542	PRKCG,AKT1,UBR5,TNFAIP3,CAPN3,TAF1,MTOR,HDAC8,CHP1,NXN,PER2,ABL1,PRMT3,USP44,U2AF2,ARRB1,CDK5,RELA,RPL11,GLMN,CTNNB1,GNL3L,ARRB2,PARP10,HMG20A,DYSF,MAD2L2,OGT,SVBP,DNAJA1,CRY1,HSPA1B,ATG5,ADGRB1,ISG15,PARK7,PLAA,LIMK1,UFL1,TRIM44,TSPO,RPL5,GCLC,HMG20B,MAD2L1,RPS7,TRIP12,CAV1,PRKCE,SENP2,SMAD7,SOX4,PSEN1,KLHL40	{[54.0,10516.0],[32.0,9356.0]}
GO_AMINO_ACID_ACTIVATION	7.84442	3.45946e-08	AARS,GATC,AASDH,EPRS,AIMP1,YARS,SARS,DALRD3,RARS,AARS2,LARS2,HARS2,LARS,VARS2,TARS2,VARS,FARSA,EARS2,FARSB,CARS2,WARS,HARS,NARS,GARS,IARS2,PARS2,DARS2,AIMP2,YARS2,DARS,QRSL1,MARS,KARS,RARS2,IARS,NARS2,MARS2,FARS2,PPA2,CARS,GATB,SARS2,WARS2,QARS	{[44.0,10526.0],[5.0,9383.0]}
GO_DENDRITIC_CELL_DIFFERENTIATION	1.35927	0.202561	HLA-G,GATA1,FCGR2B,CCR7,TRPM2,LILRB2,UBD,TMEM176A,SPI1,TGFB1,AXL,ZBTB46,RELB,IRF4,FLT3,CSF2,LYN,TRAF6,DCSTAMP,CAMK4,RBPJ,F2RL1,PSEN1,TGFBR2,TREM2,AGER	{[26.0,10544.0],[17.0,9371.0]}
GO_NATURAL_KILLER_CELL_DIFFERENTIATION	3.02305	0.0171888	PTPRC,MERTK,RASGRP1,PRDM1,PGLYRP4,TOX,TUSC2,PGLYRP2,HNF1A,ZBTB1,STAT5B,PGLYRP3,AXL,ZNF683,TYRO3,PIK3CD,SP3	{[17.0,10553.0],[5.0,9383.0]}
GO_BONE_TRABECULA_MORPHOGENESIS	10.6691	0.00322785	THBS3,COL1A1,SFRP1,WNT10B,MSX2,PLXNB1,FBN2,CHAD,GREM1,MMP2,SEMA4D,PPARGC1B	{[12.0,10558.0],[1.0,9387.0]}
GO_REGULATION_OF_INFLAMMATORY_RESPONSE_TO_ANTIGENIC_STIMULUS	2.03167	0.0813745	C3,BTK,TNF,FCGR2B,CCR7,ADCYAP1,GPX1,PSMB4,IL12B,IL20RB,PARK7,IL10,CNR1,LTA,HLA-E,ZP3	{[16.0,10554.0],[7.0,9381.0]}
GO_REGULATION_OF_PROTEASOMAL_UBIQUITIN_DEPENDENT_PROTEIN_CATABOLIC_PROCESS	1.4708	0.0232847	NKD2,HSPBP1,AKT1,TRIB2,GBA,TAF1,DAB2,NFE2L2,WNT10B,BAG6,TLK2,RAD23B,HFE,IL33,LRRK2,FBXO22,CLEC16A,CCAR2,SENP1,RNF19A,PLK1,RPL11,ARAF,KEAP1,GLMN,SMARCC1,STUB1,PLK2,CSNK1D,NOP53,VCP,SIRT2,CSNK1E,UBQLN4,DNAJB2,OGT,GIPC1,HSPA1B,PIAS1,BCAP31,TRIB1,BBS7,PRICKLE1,PARK7,UBQLN1,ARIH1,SHH,PRKN,USP7,NUB1,HSP90AB1,UBQLN2,MAP1A,TRIB3,UFL1,COMMD1,RACK1,WAC,CHFR,AURKA,GCLC,DVL1,TAF9,MDM2,SOCS4,GSK3B,CAV1,USP14,…	{[76.0,10494.0],[46.0,9342.0]}
GO_NEGATIVE_REGULATION_OF_NEURON_DIFFERENTIATION	3.34587	7.79248e-16	GLI3,DENND5A,NLGN3,DTX1,SPOCK1,CNTN2,IRX3,SEMA3E,NOTCH1,ITM2C,CDK5,OLIG2,MIB1,TRPC6,ASCL1,TBX6,SIX3,ZNF365,GPR37L1,ADCY6,INPP5F,EDNRB,DAB1,FOXO3,EIF4ENIF1,EPHB2,PTPRS,PHOX2B,SEMA3F,GSK3B,APOE,EFNB2,RTN4RL2,SEMA4G,GDF11,CTSZ,PSEN1,LRIG2,GFI1,SOX9,LMX1A,SPP1,EPHA4,SOX3,NOTCH3,NTN1,SOX2,MYLIP,PLXNA3,SYNGAP1,FOXG1,IFRD1,NKX2-2,KIAA0319,LINGO1,HMG20A,NGFR,WNT3A,PBX1,INPP5J,GAK,PAFAH1B1,PAX6,SEMA3C,SEM…	{[175.0,10395.0],[47.0,9341.0]}
GO_REGULATION_OF_SKELETAL_MUSCLE_TISSUE_DEVELOPMENT	4.25675	7.02761e-06	UQCC2,FAM129B,KLHL41,HDAC9,LMOD3,WNT10B,FBXO22,CYP26B1,DLL1,USP19,BCL2,CDON,PRKAA1,SHOX2,TGFB1,MYF6,HMGCR,MYOD1,SIX4,MEGF10,DKK1,WNT3A,MYOCD,TWIST1,ACTN3,DDX5,GPC1,EPHB1,MEF2C,MYF5,SHH,HDAC4,SIX1,TBX1,TLL2,SOX17,NR1D2,FLOT1,ARNTL,MTM1,MYOG,CTNNB1,MSTN	{[43.0,10527.0],[9.0,9379.0]}
GO_MUSCLE_TISSUE_DEVELOPMENT	3.2514	1.27282e-26	YY1,HLX,HEY2,MYOM1,HEG1,TCF21,TENM4,CAV3,JARID2,OBSL1,OSR1,SRF,SIK1,MSC,DSP,GATA4,SLC9A1,NPRL3,LMOD3,NRG1,NKX2-6,PRKAA1,KLF5,TBX5,WNT3A,PPARA,DMRTA2,CCNB1,BMP2,EMD,ERBB4,NR1D2,KLHL40,CALR,TNNC1,MSTN,PTEN,GPCPD1,PITX1,FOXL2,YAP1,RARA,MYH7,TNNI3,MYBPC2,SOX11,MYOZ1,MYOM3,FGFR1,GREM1,COPS2,EP300,LOX,ENG,RIPK1,MYLPF,PDGFRB,CBY1,ZFPM2,ARRB2,MED1,FOXC1,LEF1,AGT,FLCN,SHH,S1PR1,AKAP13,NF1,KDM6B,SMYD1,EYA1…	{[319.0,10251.0],[89.0,9299.0]}
GO_NEGATIVE_REGULATION_OF_PROTEIN_AUTOPHOSPHORYLATION	1.4214	0.368941	ADIPOQ,GFRA2,PTPRC,ENG,ENPP1,CAV1,CHP1,NLRP12	{[8.0,10562.0],[5.0,9383.0]}
GO_ACID_SECRETION	2.43451	3.26636e-06	TRH,CPLX1,MAP2K6,SLC22A16,TNFRSF11A,NMU,PLA2G2A,SNAP25,SLC6A1,KCNQ1,PPFIA4,CCKBR,ACE,SLC9A4,DRD3,PLA2G4A,ABCC3,SLC1A3,IL1B,VAMP2,KMO,HRH3,SV2A,PTGER3,OXTR,NTRK2,RIMS1,CYP4F2,PLA2R1,STX1A,SNCA,PLA2G12A,SLC26A7,P2RX7,PPFIA1,SLC6A9,GLS2,GHRL,DRD4,STARD10,SYT1,CASR,ABAT,GLS,PLA2G5,UNC13B,MIF,PLA2G2D,LEP,TRPC4,TSPOAP1,AGXT,PLA2G6,SLC26A6,NOS2,STXBP1,PLA2G10,ABCC4,SLC1A2,NMB,PROCA1,TRPV1,HIP1R,SLC17A7,…	{[90.0,10480.0],[33.0,9355.0]}
GO_POSITIVE_REGULATION_OF_ADAPTIVE_IMMUNE_RESPONSE	1.94427	0.000802248	FOXP3,HLA-G,MSH6,NFKBIZ,HLX,CD1E,PTPRC,TNFSF13,RIF1,IL6R,IL12RB1,CD226,TFRC,CLCF1,ZBTB1,UNG,HLA-E,HLA-B,B2M,ZP3,P2RX7,IL6ST,MAP3K7,CCR2,HLA-C,C3,TNF,CD1C,EXOSC3,ATAD5,ADA,MALT1,CD1D,IL6,SIRT1,CD40,NECTIN2,HLA-A,TGFB1,PRKCQ,LTA,CD274,NLRP10,TP53BP1,HLA-F,STX7,NSD2,MAD2L2,BTK,PYCARD,PVR,EIF2AK4,CD4,HSPD1,IL1B,MSH2,FADD,FZD5,TRAF6,CD1A,TBX21,MLH1,IL27RA,NLRP3,IL18,TNFRSF13C,FCER2,IL23R,RIPK2,GATA3,I…	{[72.0,10498.0],[33.0,9355.0]}
GO_REGULATION_OF_OSTEOCLAST_DIFFERENTIATION	1.48211	0.0792458	ESRRA,INPP5D,TLR4,FOS,MTOR,FSHB,FBXW7,TOB2,TNFSF11,GPR68,PIK3R1,TNF,TYROBP,CA2,FBN1,TLR3,CARTPT,LTF,BGLAP,SIGLEC15,SFRP1,ATP6AP1,GPR55,CREB1,IFNG,TRAF6,NOTCH2,KLF10,CSF1,MITF,GNAS,IL23R,CAMK4,MAFB,TMEM178A,IL12B,NF1,TFE3,CTNNB1,PPARGC1B	{[40.0,10530.0],[24.0,9364.0]}
GO_REGULATION_OF_PROTEIN_BINDING	2.32886	4.51189e-09	PLCL2,ACTB,TTBK1,TAF1,DAB2,ABL1,TTBK2,NES,LFNG,BAMBI,CDK5,ARRB1,DAB2IP,PLK1,DACT1,ACE,AKTIP,BDNF,ARHGEF7,ITGB1BP1,CTHRC1,RIPOR2,ADD2,CAPRIN2,CFHR1,GSK3B,APOE,CTSZ,LRPAP1,ZFPM1,PSEN1,AMFR,PPP2CB,HDAC5,DTNBP1,CCPG1,PDGFB,TIRAP,EPHA4,DISC1,NRG1,ADRB2,MEN1,PTPRF,ROCK1,GREM2,RFNG,DDX11,CDON,PIN1,PRMT8,GNL3L,ADD1,NVL,PEX14,ANGPT1,KDM1A,WNT3A,PPARA,GOLGA2,TIAM1,MAPRE1,PKD1,MEF2C,PARK7,BMP2,BAX,AURKB,PRK…	{[156.0,10414.0],[60.0,9328.0]}
GO_CARDIAC_SEPTUM_DEVELOPMENT	6.07249	2.57911e-14	CITED2,WNT11,HEY2,HAND1,CHD7,HEG1,NOTCH1,TBX2,SALL4,FGFRL1,NRP2,DNAH11,NOTCH2,ROBO2,EGLN1,DNM2,BMPR2,SMAD7,ZFPM1,TBX3,TBX20,GATA4,ANK2,NPRL3,LTBP1,ROBO1,SUFU,CCN1,TBX5,NSD2,MKS1,MYH10,TGFBR3,SEMA3C,GATA6,GATA3,FGF8,RBPJ,MDM2,PTK7,TGFBR1,SMAD4,SLIT3,DCTN5,VANGL2,STRA6,DAND5,RARB,PCSK5,FZD1,LUZP1,MSX2,ISL1,SLIT2,NOG,XIRP2,BMP4,RARA,PRDM1,DHRS3,SMO,HEY1,TBX1,NKX2-5,PLXND1,JAG1,SOX11,FZD2,CRELD1,BMPR…	{[95.0,10475.0],[14.0,9374.0]}
GO_REGULATION_OF_ICOSANOID_SECRETION	3.33396	0.0184168	PLA2G6,PLA2R1,MIF,EDN1,AGTR2,CYP4A11,MAP2K6,SYK,TNFRSF11A,IL1B,PLA2G10,CYP4F2,TNFSF11,P2RX7,P2RX4	{[15.0,10555.0],[4.0,9384.0]}
GO_L_ALPHA_AMINO_ACID_TRANSMEMBRANE_TRANSPORT	1.42236	0.135089	SLC25A13,PER2,SLC25A22,SLC6A5,SLC7A5,SLC7A10,SLC25A15,SLC7A2,SLC25A12,SLC7A3,SLC1A2,SLC1A1,SLC17A8,KCNJ10,ATP1A2,RGS2,SLC7A13,SLC7A8,PQLC2,ARL6IP1,SLC7A7,AGT,SLC1A3,SLC38A3,SLC25A29,SLC17A7,SLC7A9,SLC15A4,SLC25A38,SLC7A6,PSEN1,SLC3A2	{[32.0,10538.0],[20.0,9368.0]}
GO_REGULATION_OF_HISTONE_METHYLATION	1.95797	0.00739648	GFI1,CTCFL,SMARCB1,KMT2A,RIF1,CTR9,AUTS2,KMT2E,CTCF,LMNA,PAX5,NSD1,CHTOP,BRCA1,MYB,TET1,RNF20,SIRT1,KDM4C,DNMT1,PYGO2,PAXBP1,MTF2,KDM1A,OGT,KMT2B,BRD4,PAX7,KDM3A,PRDM12,BCOR,JARID2,DNMT3B,ATRX,RTF1,GATA3,MECP2,SMAD4,MTHFR,ZNF335,EED,MLLT6,CTNNB1,PHF19	{[44.0,10526.0],[20.0,9368.0]}
GO_POSITIVE_REGULATION_OF_MITOCHONDRIAL_FISSION	2.44398	0.0914521	MFF,DDHD1,DNM1L,KDR,DCN,MIEF1,DDHD2,PINK1,PRKN,VPS35,MIEF2	{[11.0,10559.0],[4.0,9384.0]}
GO_ANTIMICROBIAL_HUMORAL_RESPONSE	0.554609	0.999517	PLA2G6,RPS19,CXCL8,CHGA,HTN3,BPI,SEMG2,KLK3,ATP7A,RNASE3,DEFB126,PGLYRP3,HLA-E,PLA2G2A,CTSG,KRT6A,SEMG1,PPP2R3C,CXCL5,SLC11A1,PI3,LTF,DMBT1,BPIFB1,PRSS2,SPINK5,IGHM,GALP,FGB,CAMP,DEFB1,GAPDH,HIST1H2BJ,SFTPD,HRG,COLEC11,ELANE,IL36RN,PGLYRP4,HIST1H2BE,PGLYRP2,LYZ,F2,CLU,CST9,DEFA4,FGA	{[47.0,10523.0],[75.0,9313.0]}
GO_EPIDERMIS_MORPHOGENESIS	5.56188	0.00017318	WNT10A,IGFBP5,ATP7A,FOXE1,KLK14,NOTCH1,BCL2,TMEM79,KLF4,KRT17,TGM3,SMO,SHH,INTU,KRT25,FGF10,KRT71,TGFB2,TP63,PLOD3,FLG2,GORAB,FGFR2,SNAI1,CTNNB1	{[25.0,10545.0],[4.0,9384.0]}
GO_INTERMEDIATE_FILAMENT_BASED_PROCESS	13.3753	7.0666e-10	AGFG1,NEFL,SYNM,MACF1,KRT16,ATXN3,KLHL24,NES,PKP2,EVPL,VIM,BFSP2,KRT18,TCHH,FAM83H,DES,DNAJB6,ATP8A2,SOD1,INA,GFAP,KRT3,KRT14,TOR1A,KRT9,RAF1,SHH,NEFH,KRT6C,KRT25,KRT71,PKP1,EPPK1,KRT2,NEFM,PLEC,DST,VPS54,KRT74,KRT20,PPL,MTM1,ERBIN,DSP,SYNC	{[45.0,10525.0],[3.0,9385.0]}
GO_COGNITION	2.92412	5.40891e-17	ATAD1,RTL4,GALR2,FOS,INSR,SHANK1,NLGN3,CNTN2,AAAS,POMK,ADGRB3,TTBK1,RP9,KALRN,SNAP25,CHD7,CASP3,PRKAR1B,SLC6A1,CDK5,ATP1A2,CUX2,MAPT,LHX8,DRD5,PTPRZ1,CHMP2B,JAKMIP1,DRD3,NTF3,JPH3,BDNF,NIPBL,RELN,ITGA8,KMT2B,MME,BCHE,GPI,FEN1,DEAF1,CREB1,CNTNAP2,HRH3,DNAH11,OXTR,SLC24A2,NPS,NTRK2,EPHB2,CHL1,NRXN2,SRF,CHRNA4,CX3CR1,APOE,NRXN1,FOXP2,ADCY3,GABRA5,PSEN1,FZD9,AMFR,DBH,AGER,CHRNB2,PRKCG,LMX1A,ARF4,LILR…	{[224.0,10346.0],[69.0,9319.0]}
GO_RESPONSE_TO_ZINC_ION	1.98889	0.0109824	OTC,SLC30A2,PTEN,HAAO,MT1A,ATP7A,TH,HAMP,P2RX4,ABCC8,P2RX7,ARG1,CA2,PARP1,SLC30A5,SLC30A8,IREB2,SLC30A4,ASS1,BGLAP,KRT14,D2HGDH,VCAM1,KHK,HVCN1,SLC39A13,GLRA1,AANAT,CREB1,SLC30A3,GGH,KCNK3,ATP13A2,TSPO,GLRA2,CPS1,ALAD,PLN	{[38.0,10532.0],[17.0,9371.0]}
GO_AXIS_SPECIFICATION	3.5164	2.89279e-07	SKI,TDGF1,COBL,ETS2,CITED2,SIX2,HEY2,HSPB11,GPC3,CDX1,OTX2,WNT6,DLL1,NOTCH1,LHX1,AHI1,PTCH1,TBXT,PITX2,WNT1,TBX6,WNT5A,SMAD2,VAX2,SIX3,MNS1,WT1,LRP6,BMP4,SFRP1,RIPPLY1,C2CD3,WNT8A,SMO,FZD5,WNT7A,BCOR,IFT172,RIPPLY2,PAX6,CER1,FGF10,LDB1,SHH,ARL13B,TTC8,AURKA,WNT3,KDM6A,NEUROG1,PGAP1,PKD1L1,FOXA2,SRF,BASP1,SMAD4,GDF3,IRX4,CDX2,BMPR1A,NODAL,SMAD6,TBX3,SETDB2,CTNNB1,PCSK6,STIL	{[67.0,10503.0],[17.0,9371.0]}
GO_PHOSPHATIDYLINOSITOL_METABOLIC_PROCESS	1.68205	0.00682396	PIP4K2A,INPP5D,PI4KA,PLCD4,GALR2,PTEN,PLA2G4C,SOCS1,MTM1,EFR3A,PLA2G10,MTMR4,SYNJ2,TTC7A,PIKFYVE,PIK3C3,PLA2G2A,PLA2G12A,PDGFRB,INPPL1,PIK3CD,PIP4K2C,SMG1,MTMR2,PIK3R1,PIK3R3,GPLD1,CSF1R,INPP5B,SOCS3,PLA2G4A,PIGW,INPP5J,MTMR3,PLA2G5,INPP5F,PIP5K1C,SYNJ1,PIK3C2A,IMPA2,PLA2G4E,INPP5K,PIK3CA,IMPA1,INPP5E,PI4K2A,PIP5K1A,PLCB1,MTMR8,FAM126A,MBOAT7,IMPAD1,PLA2G2D,PLCH2,INPP5A,OCRL,PIK3R2,CISH,EFR3B,PGA…	{[68.0,10502.0],[36.0,9352.0]}
GO_CELL_PART_MORPHOGENESIS	3.10874	5.00603e-40	NEXN,SHANK1,UNC5D,HDAC6,TRAK1,NES,DAB2IP,SCN1B,EEF2K,PTPRZ1,ZNF365,CYFIP2,IRS2,RELN,KNDC1,NTRK2,EPHB2,PLEKHO1,OBSL1,RIMS1,TUBB3,SRF,WDR36,PQBP1,FLRT3,RAB21,CACNG7,CHRNB2,GRB10,NTNG1,FEZF1,ABI2,RREB1,OPHN1,PIK3R1,SHANK3,DCLK1,B4GAT1,ROBO1,EPHA1,VAX2,ATP8A2,WNT3A,PTPRD,SIAH1,NCKAP1,SPTBN2,CAMK2B,UNC5B,PRKN,PAFAH1B1,UBB,MFF,GATA3,TNIK,PTPRA,FBXO31,CHRNA3,ANAPC2,PTEN,TRIM46,GFRA3,GFRA1,APBB1,KIF5C,WE…	{[521.0,10049.0],[154.0,9234.0]}
GO_PIGMENT_GRANULE_LOCALIZATION	2.9643	0.0106531	DCTN2,RAB27A,MKKS,BLOC1S3,GPR143,VPS33B,BBS2,ARL6,BLOC1S6,MLPH,BBS7,BBS4,RAB11A,RAB11B,CDH3,BBS5,SHROOM2,MYO7A,VPS33A,MYO5A	{[20.0,10550.0],[6.0,9382.0]}
GO_VASCULAR_ENDOTHELIAL_GROWTH_FACTOR_SIGNALING_PATHWAY	1.9058	0.0293228	NUS1,SPRY2,PDGFRA,VEGFA,PDGFRB,DLL1,HSPB1,SMOC2,PRKD1,KDR,ROBO1,DAB2IP,FLT4,FOXC1,VEGFC,GAB1,DCN,MYO1C,FLT3,NRP2,XDH,HRG,SEMA6A,PRKD2,FLT1,ADAMTS3,CCBE1,JCAD,NRP1,VEGFB	{[30.0,10540.0],[14.0,9374.0]}
GO_RESPONSE_TO_ORGANOPHOSPHORUS	2.70728	6.58543e-08	REN,FOS,PTK2B,TAF1,CNGA3,EEF2K,SPARC,KCNQ1,DUSP1,AQP1,SOD1,HCN2,ZFP36L1,AANAT,IL1B,TRPC3,HCN1,P2RX5,PANX1,RAP1B,P2RY11,PCK1,TRPM4,HCN4,PDE2A,SELL,SSH1,PNPT1,TEK,P2RY1,DUOX1,P2RX7,AKAP9,KDM1A,RYR3,COL1A1,P2RX1,SLC5A5,PLA2G5,ITPR2,MMP19,PKLR,DUOX2,CDO1,DMTN,CPS1,SDC1,PPARGC1B,AGXT,RAPGEF3,SLC6A3,ALDH3A1,PTEN,SLC26A6,BSG,STAR,RELA,HSP90B1,TRPV1,APEX1,SLC8A1,WT1,DNTT,PTGS2,P2RY2,SLC26A3,GPD1,KCNE1,PT…	{[103.0,10467.0],[34.0,9354.0]}
[truncated: 9,802 more rows]

## Sheet: MAT_Disease_GO_P_Analysis
GO_Pathway	oddsratio	p_value	common_genes	p_value_arr
GO_POSITIVE_REGULATION_OF_VIRAL_TRANSCRIPTION	0	1		{[0.0,656.0],[41.0,18286.0]}
[truncated: 9,995 more rows]

## Sheet: GO_P_Values_matrisome
GO_Pathway	oddsratio	p_value	common_genes
[truncated: 9,996 more rows]

## Sheet: ALL_Disease_KEGG_P_Analysis
KEGG_Pathway	oddsratio	p_value	common_genes	p_value_arr
[truncated: 186 more rows]

## Sheet: MAT_Disease_KEGG_P_Analysis
KEGG_Pathway	oddsratio	p_value	common_genes	p_value_arr
[truncated: 186 more rows]

## Sheet: KEGG_P_Values_Greater
KEGG_Pathway	oddsratio	p_value	common_genes
[truncated: 186 more rows]

## Sheet: Other_Information_And_Disease_C
Disease Gene Associations Compiled from Various Data Sources (HGMD, OMIM, ClinVar ... Methods Described in https://doi.org/10.1186/s12920-018-0386-2, Table Updated Jan 2020)
[truncated: 18 more rows]

[truncated: 7 more sheets: disease_clusters, clustered_gene_counts, ECM Glycoproteins-disease, ECM Regulators-diseases, ECM-affiliated Proteins-disease, Proteoglycans-diseases, Secreted Factors-diseases]
