# Supplementary material for: The Human Extracellular Matrix Diseasome Reveals Genotype–Phenotype Associations with Clinical Implications for Age-Related Diseases
Source: Biomedicines. 2023 Apr 19;11(4):1212. doi: 10.3390/biomedicines11041212 (PMC10135578; doi:10.3390/biomedicines11041212)
Supplement: Supplementary file 1 [file biomedicines-11-01212-s001.zip › Table_S10_ECM_drug_repurposing.csv]

division	category	Gene Symbol	Gene Name	geneid	Drug	DrugBank indication	SNP	PheWAS phenotype (ICD9 code)	Description of ICD9 code	PheWAS p-value	PheWAS OR	Found indication in DrugBank (0=no, 1=yes)	Number of Medline abstracts	Number in Clinical Trial Registry	Identified by GWAS data	Type	Synonyms	HGNC_IDs Links	UniProt_IDs	Refseq_IDs
Core matrisome	Collagens	COL1A2	collagen, type I, alpha 2	2198	collagenase	used to promote debridement of necrotic tissue in the treatment of severe burns and dermal ulcers including decubitus ulcers.	rs441051	41.1	Staphylococcus infections	0.04538	0.8124	0	0	0	NA	Novel	OI4	2198	P08123	NP_000080.2
Core matrisome	Collagens	COL1A2	collagen, type I, alpha 2	2198	collagenase	used to promote debridement of necrotic tissue in the treatment of severe burns and dermal ulcers including decubitus ulcers.	rs441051	41.11	Methicillin sensitive Staphylococcus aureus	0.03505	0.7497	0	0	0	NA	Novel	OI4	2198	P08123	NP_000080.2
Core matrisome	Collagens	COL1A2	collagen, type I, alpha 2	2198	collagenase	used to promote debridement of necrotic tissue in the treatment of severe burns and dermal ulcers including decubitus ulcers.	rs441051	41.9	Drug-resistant infection	0.0341	0.7261	0	0	0	NA	Novel	OI4	2198	P08123	NP_000080.2
Core matrisome	Collagens	COL1A2	collagen, type I, alpha 2	2198	collagenase	used to promote debridement of necrotic tissue in the treatment of severe burns and dermal ulcers including decubitus ulcers.	rs441051	78	Viral warts & HPV	0.02352	0.8663	0	0	0	NA	Novel	OI4	2198	P08123	NP_000080.2
Core matrisome	Collagens	COL1A2	collagen, type I, alpha 2	2198	collagenase	used to promote debridement of necrotic tissue in the treatment of severe burns and dermal ulcers including decubitus ulcers.	rs441051	130	Spirochetal infection	2.184e-4	1.814	0	0	0	NA	Novel	OI4	2198	P08123	NP_000080.2
Core matrisome	Collagens	COL1A2	collagen, type I, alpha 2	2198	collagenase	used to promote debridement of necrotic tissue in the treatment of severe burns and dermal ulcers including decubitus ulcers.	rs441051	130.1	Lyme disease	5.093e-4	1.77	0	2	0	NA	Likely	OI4	2198	P08123	NP_000080.2
Core matrisome	Collagens	COL1A2	collagen, type I, alpha 2	2198	collagenase	used to promote debridement of necrotic tissue in the treatment of severe burns and dermal ulcers including decubitus ulcers.	rs441051	173	Skin neoplasm of uncertain behavior	0.02692	1.186	0	0	0	NA	Novel	OI4	2198	P08123	NP_000080.2
Core matrisome	Collagens	COL1A2	collagen, type I, alpha 2	2198	collagenase	used to promote debridement of necrotic tissue in the treatment of severe burns and dermal ulcers including decubitus ulcers.	rs441051	199	Neoplasm of uncertain behavior	0.01547	1.187	0	14	0	NA	Likely	OI4	2198	P08123	NP_000080.2
Core matrisome	Collagens	COL1A2	collagen, type I, alpha 2	2198	collagenase	used to promote debridement of necrotic tissue in the treatment of severe burns and dermal ulcers including decubitus ulcers.	rs441051	241	Nontoxic nodular goiter	0.03023	1.163	0	0	0	NA	Novel	OI4	2198	P08123	NP_000080.2
Core matrisome	Collagens	COL1A2	collagen, type I, alpha 2	2198	collagenase	used to promote debridement of necrotic tissue in the treatment of severe burns and dermal ulcers including decubitus ulcers.	rs441051	260.6	Anorexia	0.007184	0.6741	0	0	0	NA	Novel	OI4	2198	P08123	NP_000080.2
Core matrisome	Collagens	COL1A2	collagen, type I, alpha 2	2198	collagenase	used to promote debridement of necrotic tissue in the treatment of severe burns and dermal ulcers including decubitus ulcers.	rs441051	270.1	Disturbances of amino-acid transport	0.0338	1.591	0	0	0	NA	Novel	OI4	2198	P08123	NP_000080.2
Core matrisome	Collagens	COL1A2	collagen, type I, alpha 2	2198	collagenase	used to promote debridement of necrotic tissue in the treatment of severe burns and dermal ulcers including decubitus ulcers.	rs441051	270.11	Disturbances of sulphur-bearing amino-acid metabolism	0.04521	1.559	0	0	0	NA	Novel	OI4	2198	P08123	NP_000080.2
Core matrisome	Collagens	COL1A2	collagen, type I, alpha 2	2198	collagenase	used to promote debridement of necrotic tissue in the treatment of severe burns and dermal ulcers including decubitus ulcers.	rs441051	275.6	Hypercalcemia	0.0168	1.249	0	0	0	NA	Novel	OI4	2198	P08123	NP_000080.2
Core matrisome	Collagens	COL1A2	collagen, type I, alpha 2	2198	collagenase	used to promote debridement of necrotic tissue in the treatment of severe burns and dermal ulcers including decubitus ulcers.	rs441051	315.2	Speech and language disorder	0.038	1.327	0	0	0	NA	Novel	OI4	2198	P08123	NP_000080.2
Core matrisome	Collagens	COL1A2	collagen, type I, alpha 2	2198	collagenase	used to promote debridement of necrotic tissue in the treatment of severe burns and dermal ulcers including decubitus ulcers.	rs441051	360	Disorders of the globe	0.01881	1.415	0	2	0	NA	Likely	OI4	2198	P08123	NP_000080.2
Core matrisome	Collagens	COL1A2	collagen, type I, alpha 2	2198	collagenase	used to promote debridement of necrotic tissue in the treatment of severe burns and dermal ulcers including decubitus ulcers.	rs441051	364.1	Corneal opacity	0.04051	1.287	0	1	0	NA	Likely	OI4	2198	P08123	NP_000080.2
Core matrisome	Collagens	COL1A2	collagen, type I, alpha 2	2198	collagenase	used to promote debridement of necrotic tissue in the treatment of severe burns and dermal ulcers including decubitus ulcers.	rs441051	372	Disorders of conjunctiva	0.04227	1.207	0	13	0	NA	Likely	OI4	2198	P08123	NP_000080.2
Core matrisome	Collagens	COL1A2	collagen, type I, alpha 2	2198	collagenase	used to promote debridement of necrotic tissue in the treatment of severe burns and dermal ulcers including decubitus ulcers.	rs441051	395	Heart valve disorders	0.02206	1.105	0	0	0	NA	Novel	OI4	2198	P08123	NP_000080.2
Core matrisome	Collagens	COL1A2	collagen, type I, alpha 2	2198	collagenase	used to promote debridement of necrotic tissue in the treatment of severe burns and dermal ulcers including decubitus ulcers.	rs441051	395.1	Nonrheumatic mitral valve disorders	0.007486	1.163	0	0	0	NA	Novel	OI4	2198	P08123	NP_000080.2
Core matrisome	Collagens	COL1A2	collagen, type I, alpha 2	2198	collagenase	used to promote debridement of necrotic tissue in the treatment of severe burns and dermal ulcers including decubitus ulcers.	rs441051	426.23	Second degree AV block	0.01452	0.5956	0	0	0	NA	Novel	OI4	2198	P08123	NP_000080.2
Core matrisome	Collagens	COL1A2	collagen, type I, alpha 2	2198	collagenase	used to promote debridement of necrotic tissue in the treatment of severe burns and dermal ulcers including decubitus ulcers.	rs441051	427.22	Atrial flutter	0.01096	1.237	0	0	0	NA	Novel	OI4	2198	P08123	NP_000080.2
Core matrisome	Collagens	COL1A2	collagen, type I, alpha 2	2198	collagenase	used to promote debridement of necrotic tissue in the treatment of severe burns and dermal ulcers including decubitus ulcers.	rs441051	427.5	Cardiac arrhythmia NOS	0.02242	1.144	0	0	0	NA	Novel	OI4	2198	P08123	NP_000080.2
Core matrisome	Collagens	COL1A2	collagen, type I, alpha 2	2198	collagenase	used to promote debridement of necrotic tissue in the treatment of severe burns and dermal ulcers including decubitus ulcers.	rs441051	428	Heart failure	0.026950000000000002	1.108	0	42	0	NA	Likely	OI4	2198	P08123	NP_000080.2
Core matrisome	Collagens	COL1A2	collagen, type I, alpha 2	2198	collagenase	used to promote debridement of necrotic tissue in the treatment of severe burns and dermal ulcers including decubitus ulcers.	rs441051	428.1	Systolic/diastolic heart failure	0.01347	1.126	0	88	0	NA	Likely	OI4	2198	P08123	NP_000080.2
Core matrisome	Collagens	COL1A2	collagen, type I, alpha 2	2198	collagenase	used to promote debridement of necrotic tissue in the treatment of severe burns and dermal ulcers including decubitus ulcers.	rs441051	433.5	Cerebral aneurysm	0.01454	1.612	0	4	0	NA	Likely	OI4	2198	P08123	NP_000080.2
Core matrisome	Collagens	COL1A2	collagen, type I, alpha 2	2198	collagenase	used to promote debridement of necrotic tissue in the treatment of severe burns and dermal ulcers including decubitus ulcers.	rs441051	444	Arterial embolism and thrombosis	0.04575	1.197	0	0	0	NA	Novel	OI4	2198	P08123	NP_000080.2
Core matrisome	Collagens	COL1A2	collagen, type I, alpha 2	2198	collagenase	used to promote debridement of necrotic tissue in the treatment of severe burns and dermal ulcers including decubitus ulcers.	rs441051	512.1	Wheezing	0.002166	0.6623	0	0	0	NA	Novel	OI4	2198	P08123	NP_000080.2
Core matrisome	Collagens	COL1A2	collagen, type I, alpha 2	2198	collagenase	used to promote debridement of necrotic tissue in the treatment of severe burns and dermal ulcers including decubitus ulcers.	rs441051	513.4	Hyperventilation	0.0436	0.577	0	0	0	NA	Novel	OI4	2198	P08123	NP_000080.2
Core matrisome	Collagens	COL1A2	collagen, type I, alpha 2	2198	collagenase	used to promote debridement of necrotic tissue in the treatment of severe burns and dermal ulcers including decubitus ulcers.	rs441051	519.8	Other diseases of respiratory system	0.02985	1.319	0	2	0	NA	Likely	OI4	2198	P08123	NP_000080.2
Core matrisome	Collagens	COL1A2	collagen, type I, alpha 2	2198	collagenase	used to promote debridement of necrotic tissue in the treatment of severe burns and dermal ulcers including decubitus ulcers.	rs441051	530.3	Stricture and stenosis of esophagus	0.02663	0.7823	0	38	0	NA	Likely	OI4	2198	P08123	NP_000080.2
Core matrisome	Collagens	COL1A2	collagen, type I, alpha 2	2198	collagenase	used to promote debridement of necrotic tissue in the treatment of severe burns and dermal ulcers including decubitus ulcers.	rs441051	531.1	Hemorrhage from gastrointestinal ulcer	0.02705	0.7056	0	1	0	NA	Likely	OI4	2198	P08123	NP_000080.2
Core matrisome	Collagens	COL1A2	collagen, type I, alpha 2	2198	collagenase	used to promote debridement of necrotic tissue in the treatment of severe burns and dermal ulcers including decubitus ulcers.	rs441051	535.6	Duodenitis	0.001084	1.522	0	0	0	NA	Novel	OI4	2198	P08123	NP_000080.2
Core matrisome	Collagens	COL1A2	collagen, type I, alpha 2	2198	collagenase	used to promote debridement of necrotic tissue in the treatment of severe burns and dermal ulcers including decubitus ulcers.	rs441051	536	Disorders of function of stomach	0.035	0.876	0	53	0	NA	Likely	OI4	2198	P08123	NP_000080.2
Core matrisome	Collagens	COL1A2	collagen, type I, alpha 2	2198	collagenase	used to promote debridement of necrotic tissue in the treatment of severe burns and dermal ulcers including decubitus ulcers.	rs441051	536.7	Complications of gastrostomy, colostomy and enterostomy	0.03222	0.4458	0	1	0	NA	Likely	OI4	2198	P08123	NP_000080.2
Core matrisome	Collagens	COL1A2	collagen, type I, alpha 2	2198	collagenase	used to promote debridement of necrotic tissue in the treatment of severe burns and dermal ulcers including decubitus ulcers.	rs441051	568.1	Peritoneal adhesions (postoperative) (postinfection)	0.01899	0.5921	0	0	0	NA	Novel	OI4	2198	P08123	NP_000080.2
Core matrisome	Collagens	COL1A2	collagen, type I, alpha 2	2198	collagenase	used to promote debridement of necrotic tissue in the treatment of severe burns and dermal ulcers including decubitus ulcers.	rs441051	614.1	Pelvic peritoneal adhesions, female (postoperative) (postinfection)	0.01571	0.2839	0	225	0	NA	Likely	OI4	2198	P08123	NP_000080.2
Core matrisome	Collagens	COL1A2	collagen, type I, alpha 2	2198	collagenase	used to promote debridement of necrotic tissue in the treatment of severe burns and dermal ulcers including decubitus ulcers.	rs441051	695.9	Unspecified erythematous condition	0.02582	0.6615	0	0	0	NA	Novel	OI4	2198	P08123	NP_000080.2
Core matrisome	Collagens	COL1A2	collagen, type I, alpha 2	2198	collagenase	used to promote debridement of necrotic tissue in the treatment of severe burns and dermal ulcers including decubitus ulcers.	rs441051	704.1	Alopecia	0.0312	0.7631	0	5	0	NA	Likely	OI4	2198	P08123	NP_000080.2
Core matrisome	Collagens	COL1A2	collagen, type I, alpha 2	2198	collagenase	used to promote debridement of necrotic tissue in the treatment of severe burns and dermal ulcers including decubitus ulcers.	rs441051	735.2	Acquired toe deformities	0.03675	1.147	0	0	0	NA	Novel	OI4	2198	P08123	NP_000080.2
Core matrisome	Collagens	COL1A2	collagen, type I, alpha 2	2198	collagenase	used to promote debridement of necrotic tissue in the treatment of severe burns and dermal ulcers including decubitus ulcers.	rs441051	735.22	Claw toe	0.007428	1.96	0	0	0	NA	Novel	OI4	2198	P08123	NP_000080.2
Core matrisome	Collagens	COL1A2	collagen, type I, alpha 2	2198	collagenase	used to promote debridement of necrotic tissue in the treatment of severe burns and dermal ulcers including decubitus ulcers.	rs441051	736.6	Unequal leg length (acquired)	0.00348	1.546	0	0	0	NA	Novel	OI4	2198	P08123	NP_000080.2
Core matrisome	Collagens	COL1A2	collagen, type I, alpha 2	2198	collagenase	used to promote debridement of necrotic tissue in the treatment of severe burns and dermal ulcers including decubitus ulcers.	rs441051	738	Other acquired musculoskeletal deformity	0.01293	1.244	0	0	0	NA	Novel	OI4	2198	P08123	NP_000080.2
Core matrisome	Collagens	COL1A2	collagen, type I, alpha 2	2198	collagenase	used to promote debridement of necrotic tissue in the treatment of severe burns and dermal ulcers including decubitus ulcers.	rs441051	738.4	Acquired spondylolisthesis	0.03724	1.252	0	0	0	NA	Novel	OI4	2198	P08123	NP_000080.2
Core matrisome	Collagens	COL1A2	collagen, type I, alpha 2	2198	collagenase	used to promote debridement of necrotic tissue in the treatment of severe burns and dermal ulcers including decubitus ulcers.	rs441051	741	Symptoms and disorders of the joints	0.006463	1.136	0	0	0	NA	Novel	OI4	2198	P08123	NP_000080.2
Core matrisome	Collagens	COL1A2	collagen, type I, alpha 2	2198	collagenase	used to promote debridement of necrotic tissue in the treatment of severe burns and dermal ulcers including decubitus ulcers.	rs441051	751	Genitourinary congenital anomalies	0.02662	0.7178	0	0	0	NA	Novel	OI4	2198	P08123	NP_000080.2
Core matrisome	Collagens	COL1A2	collagen, type I, alpha 2	2198	collagenase	used to promote debridement of necrotic tissue in the treatment of severe burns and dermal ulcers including decubitus ulcers.	rs441051	751.2	Congenital anomalies of urinary system	0.005929	0.5935	0	0	0	NA	Novel	OI4	2198	P08123	NP_000080.2
Core matrisome	Collagens	COL1A2	collagen, type I, alpha 2	2198	collagenase	used to promote debridement of necrotic tissue in the treatment of severe burns and dermal ulcers including decubitus ulcers.	rs441051	751.21	Cystic kidney disease	0.02952	0.6157	0	0	0	NA	Novel	OI4	2198	P08123	NP_000080.2
Core matrisome	Collagens	COL1A2	collagen, type I, alpha 2	2198	collagenase	used to promote debridement of necrotic tissue in the treatment of severe burns and dermal ulcers including decubitus ulcers.	rs441051	755.1	Congenital deformities of feet	0.02716	1.277	0	6	0	NA	Likely	OI4	2198	P08123	NP_000080.2
Core matrisome	Collagens	COL1A2	collagen, type I, alpha 2	2198	collagenase	used to promote debridement of necrotic tissue in the treatment of severe burns and dermal ulcers including decubitus ulcers.	rs441051	783	Fever of unknown origin	0.01302	0.8893	0	14	0	NA	Likely	OI4	2198	P08123	NP_000080.2
Core matrisome	Collagens	COL1A2	collagen, type I, alpha 2	2198	collagenase	used to promote debridement of necrotic tissue in the treatment of severe burns and dermal ulcers including decubitus ulcers.	rs441051	804	Fracture of hand or wrist	0.02139	1.163	0	373	4	NA	Strongly supported	OI4	2198	P08123	NP_000080.2
Core matrisome	Collagens	COL1A2	collagen, type I, alpha 2	2198	collagenase	used to promote debridement of necrotic tissue in the treatment of severe burns and dermal ulcers including decubitus ulcers.	rs441051	835	Internal derangement of knee	0.02626	0.8733	0	184	1	NA	Strongly supported	OI4	2198	P08123	NP_000080.2
Core matrisome	Collagens	COL1A2	collagen, type I, alpha 2	2198	collagenase	used to promote debridement of necrotic tissue in the treatment of severe burns and dermal ulcers including decubitus ulcers.	rs441051	870	Open wounds of head; neck; and trunk	0.003613	0.8318	0	152	0	NA	Likely	OI4	2198	P08123	NP_000080.2
Core matrisome	Collagens	COL1A2	collagen, type I, alpha 2	2198	collagenase	used to promote debridement of necrotic tissue in the treatment of severe burns and dermal ulcers including decubitus ulcers.	rs441051	961.1	Sulfonamides	0.02713	1.236	0	0	0	NA	Novel	OI4	2198	P08123	NP_000080.2
Core matrisome	Collagens	COL1A2	collagen, type I, alpha 2	2198	collagenase	used to promote debridement of necrotic tissue in the treatment of severe burns and dermal ulcers including decubitus ulcers.	rs441051	962.3	Adverse effects of hormones and synthetic substitutes	1.703e-4	2.867	0	0	0	NA	Novel	OI4	2198	P08123	NP_000080.2
Core matrisome	ECM Glycoproteins	NOV	nephroblastoma overexpressed gene	7885	insulin regular	indicated as an adjunct to diet and exercise to improve glycemic control in adults and children with type 1 and type 2 diabetes mellitus.	rs2071518	38	Septicemia	0.003694	0.8145	0	0	0	NA	Novel	CCN3|IGFBP9	7885	P48745	NP_002505.1
Core matrisome	ECM Glycoproteins	NOV	nephroblastoma overexpressed gene	7885	insulin regular	indicated as an adjunct to diet and exercise to improve glycemic control in adults and children with type 1 and type 2 diabetes mellitus.	rs2071518	38.2	Gram positive septicemia	0.03994	0.6374	0	0	0	NA	Novel	CCN3|IGFBP9	7885	P48745	NP_002505.1
Core matrisome	ECM Glycoproteins	NOV	nephroblastoma overexpressed gene	7885	insulin regular	indicated as an adjunct to diet and exercise to improve glycemic control in adults and children with type 1 and type 2 diabetes mellitus.	rs2071518	38.3	Bacteremia	5.762e-4	0.6691	0	0	0	NA	Novel	CCN3|IGFBP9	7885	P48745	NP_002505.1
Core matrisome	ECM Glycoproteins	NOV	nephroblastoma overexpressed gene	7885	insulin regular	indicated as an adjunct to diet and exercise to improve glycemic control in adults and children with type 1 and type 2 diabetes mellitus.	rs2071518	41.12	Methicillin resistant Staphylococcus aureus	0.03062	0.5186	0	0	0	NA	Novel	CCN3|IGFBP9	7885	P48745	NP_002505.1
Core matrisome	ECM Glycoproteins	NOV	nephroblastoma overexpressed gene	7885	insulin regular	indicated as an adjunct to diet and exercise to improve glycemic control in adults and children with type 1 and type 2 diabetes mellitus.	rs2071518	41.2	Streptococcus infection	0.04693	0.7753	0	0	0	NA	Novel	CCN3|IGFBP9	7885	P48745	NP_002505.1
Core matrisome	ECM Glycoproteins	NOV	nephroblastoma overexpressed gene	7885	insulin regular	indicated as an adjunct to diet and exercise to improve glycemic control in adults and children with type 1 and type 2 diabetes mellitus.	rs2071518	136	Other infectious diseases	0.03531	0.5706	0	0	0	NA	Novel	CCN3|IGFBP9	7885	P48745	NP_002505.1
Core matrisome	ECM Glycoproteins	NOV	nephroblastoma overexpressed gene	7885	insulin regular	indicated as an adjunct to diet and exercise to improve glycemic control in adults and children with type 1 and type 2 diabetes mellitus.	rs2071518	191	Malignant neoplasm of brain and nervous system	0.009701	0.6558	0	0	0	NA	Novel	CCN3|IGFBP9	7885	P48745	NP_002505.1
Core matrisome	ECM Glycoproteins	NOV	nephroblastoma overexpressed gene	7885	insulin regular	indicated as an adjunct to diet and exercise to improve glycemic control in adults and children with type 1 and type 2 diabetes mellitus.	rs2071518	191.1	Cancer of brain and nervous system	0.006973	0.5322	0	0	0	NA	Novel	CCN3|IGFBP9	7885	P48745	NP_002505.1
Core matrisome	ECM Glycoproteins	NOV	nephroblastoma overexpressed gene	7885	insulin regular	indicated as an adjunct to diet and exercise to improve glycemic control in adults and children with type 1 and type 2 diabetes mellitus.	rs2071518	191.11	Brain cancer	0.007043	0.5094	0	0	0	NA	Novel	CCN3|IGFBP9	7885	P48745	NP_002505.1
Core matrisome	ECM Glycoproteins	NOV	nephroblastoma overexpressed gene	7885	insulin regular	indicated as an adjunct to diet and exercise to improve glycemic control in adults and children with type 1 and type 2 diabetes mellitus.	rs2071518	211	Benign neoplasm of other parts of digestive system	0.0163	0.7451	0	0	0	NA	Novel	CCN3|IGFBP9	7885	P48745	NP_002505.1
Core matrisome	ECM Glycoproteins	NOV	nephroblastoma overexpressed gene	7885	insulin regular	indicated as an adjunct to diet and exercise to improve glycemic control in adults and children with type 1 and type 2 diabetes mellitus.	rs2071518	250.15	Type 1 diabetic peripheral circulatory disorders	0.04979	0.5244	0	0	0	NA	Novel	CCN3|IGFBP9	7885	P48745	NP_002505.1
Core matrisome	ECM Glycoproteins	NOV	nephroblastoma overexpressed gene	7885	insulin regular	indicated as an adjunct to diet and exercise to improve glycemic control in adults and children with type 1 and type 2 diabetes mellitus.	rs2071518	255	Disorders of adrenal glands	0.0486	1.246	0	0	0	NA	Novel	CCN3|IGFBP9	7885	P48745	NP_002505.1
Core matrisome	ECM Glycoproteins	NOV	nephroblastoma overexpressed gene	7885	insulin regular	indicated as an adjunct to diet and exercise to improve glycemic control in adults and children with type 1 and type 2 diabetes mellitus.	rs2071518	260.5	Abnormal loss of weight and underweight	0.03174	0.7933	0	0	0	NA	Novel	CCN3|IGFBP9	7885	P48745	NP_002505.1
Core matrisome	ECM Glycoproteins	NOV	nephroblastoma overexpressed gene	7885	insulin regular	indicated as an adjunct to diet and exercise to improve glycemic control in adults and children with type 1 and type 2 diabetes mellitus.	rs2071518	261	Vitamin deficiency	0.003252	1.206	0	0	0	NA	Novel	CCN3|IGFBP9	7885	P48745	NP_002505.1
Core matrisome	ECM Glycoproteins	NOV	nephroblastoma overexpressed gene	7885	insulin regular	indicated as an adjunct to diet and exercise to improve glycemic control in adults and children with type 1 and type 2 diabetes mellitus.	rs2071518	261.2	Vitamin B-complex deficiencies	0.02276	1.205	0	0	0	NA	Novel	CCN3|IGFBP9	7885	P48745	NP_002505.1
Core matrisome	ECM Glycoproteins	NOV	nephroblastoma overexpressed gene	7885	insulin regular	indicated as an adjunct to diet and exercise to improve glycemic control in adults and children with type 1 and type 2 diabetes mellitus.	rs2071518	272	Disorders of lipoid metabolism	0.007057	1.103	0	0	0	NA	Novel	CCN3|IGFBP9	7885	P48745	NP_002505.1
Core matrisome	ECM Glycoproteins	NOV	nephroblastoma overexpressed gene	7885	insulin regular	indicated as an adjunct to diet and exercise to improve glycemic control in adults and children with type 1 and type 2 diabetes mellitus.	rs2071518	272.1	Hyperlipidemia	0.004743	1.109	0	0	0	NA	Novel	CCN3|IGFBP9	7885	P48745	NP_002505.1
Core matrisome	ECM Glycoproteins	NOV	nephroblastoma overexpressed gene	7885	insulin regular	indicated as an adjunct to diet and exercise to improve glycemic control in adults and children with type 1 and type 2 diabetes mellitus.	rs2071518	281.12	Vitamin B12 deficiency anemia	0.0308	1.433	0	0	0	NA	Novel	CCN3|IGFBP9	7885	P48745	NP_002505.1
Core matrisome	ECM Glycoproteins	NOV	nephroblastoma overexpressed gene	7885	insulin regular	indicated as an adjunct to diet and exercise to improve glycemic control in adults and children with type 1 and type 2 diabetes mellitus.	rs2071518	282	Hereditary hemolytic anemias	0.02495	0.5721	0	0	0	NA	Novel	CCN3|IGFBP9	7885	P48745	NP_002505.1
Core matrisome	ECM Glycoproteins	NOV	nephroblastoma overexpressed gene	7885	insulin regular	indicated as an adjunct to diet and exercise to improve glycemic control in adults and children with type 1 and type 2 diabetes mellitus.	rs2071518	282.9	Other hereditary hemolytic anemias	0.03797	0.4267	0	0	0	NA	Novel	CCN3|IGFBP9	7885	P48745	NP_002505.1
Core matrisome	ECM Glycoproteins	NOV	nephroblastoma overexpressed gene	7885	insulin regular	indicated as an adjunct to diet and exercise to improve glycemic control in adults and children with type 1 and type 2 diabetes mellitus.	rs2071518	283	Acquired hemolytic anemias	0.03036	0.4732	0	0	0	NA	Novel	CCN3|IGFBP9	7885	P48745	NP_002505.1
Core matrisome	ECM Glycoproteins	NOV	nephroblastoma overexpressed gene	7885	insulin regular	indicated as an adjunct to diet and exercise to improve glycemic control in adults and children with type 1 and type 2 diabetes mellitus.	rs2071518	286.1	Congenital coagulation defects	0.02799	0.5134	0	0	0	NA	Novel	CCN3|IGFBP9	7885	P48745	NP_002505.1
Core matrisome	ECM Glycoproteins	NOV	nephroblastoma overexpressed gene	7885	insulin regular	indicated as an adjunct to diet and exercise to improve glycemic control in adults and children with type 1 and type 2 diabetes mellitus.	rs2071518	286.12	Clotting factor deficiency	0.02008	0.3899	0	0	0	NA	Novel	CCN3|IGFBP9	7885	P48745	NP_002505.1
Core matrisome	ECM Glycoproteins	NOV	nephroblastoma overexpressed gene	7885	insulin regular	indicated as an adjunct to diet and exercise to improve glycemic control in adults and children with type 1 and type 2 diabetes mellitus.	rs2071518	287.31	Primary thrombocytopenia	0.03229	0.6166	0	0	0	NA	Novel	CCN3|IGFBP9	7885	P48745	NP_002505.1
Core matrisome	ECM Glycoproteins	NOV	nephroblastoma overexpressed gene	7885	insulin regular	indicated as an adjunct to diet and exercise to improve glycemic control in adults and children with type 1 and type 2 diabetes mellitus.	rs2071518	290.2	Delirium due to conditions classified elsewhere	0.01683	0.7107	0	0	0	NA	Novel	CCN3|IGFBP9	7885	P48745	NP_002505.1
Core matrisome	ECM Glycoproteins	NOV	nephroblastoma overexpressed gene	7885	insulin regular	indicated as an adjunct to diet and exercise to improve glycemic control in adults and children with type 1 and type 2 diabetes mellitus.	rs2071518	291	Other specified nonpsychotic and/or transient mental disorders	0.01264	0.8042	0	0	0	NA	Novel	CCN3|IGFBP9	7885	P48745	NP_002505.1
Core matrisome	ECM Glycoproteins	NOV	nephroblastoma overexpressed gene	7885	insulin regular	indicated as an adjunct to diet and exercise to improve glycemic control in adults and children with type 1 and type 2 diabetes mellitus.	rs2071518	291.4	Mental disorders due to brain damage	0.009218	0.792	0	0	0	NA	Novel	CCN3|IGFBP9	7885	P48745	NP_002505.1
Core matrisome	ECM Glycoproteins	NOV	nephroblastoma overexpressed gene	7885	insulin regular	indicated as an adjunct to diet and exercise to improve glycemic control in adults and children with type 1 and type 2 diabetes mellitus.	rs2071518	292.4	Altered mental status	0.02625	0.7863	0	0	0	NA	Novel	CCN3|IGFBP9	7885	P48745	NP_002505.1
Core matrisome	ECM Glycoproteins	NOV	nephroblastoma overexpressed gene	7885	insulin regular	indicated as an adjunct to diet and exercise to improve glycemic control in adults and children with type 1 and type 2 diabetes mellitus.	rs2071518	327.4	Insomnia	0.03593	0.8728	0	0	0	NA	Novel	CCN3|IGFBP9	7885	P48745	NP_002505.1
Core matrisome	ECM Glycoproteins	NOV	nephroblastoma overexpressed gene	7885	insulin regular	indicated as an adjunct to diet and exercise to improve glycemic control in adults and children with type 1 and type 2 diabetes mellitus.	rs2071518	348.1	Coma; stupor; and brain damage	0.003422	0.8269	0	0	0	NA	Novel	CCN3|IGFBP9	7885	P48745	NP_002505.1
Core matrisome	ECM Glycoproteins	NOV	nephroblastoma overexpressed gene	7885	insulin regular	indicated as an adjunct to diet and exercise to improve glycemic control in adults and children with type 1 and type 2 diabetes mellitus.	rs2071518	362.23	Cystoid macular degeneration of retina	0.01536	1.291	0	0	0	NA	Novel	CCN3|IGFBP9	7885	P48745	NP_002505.1
Core matrisome	ECM Glycoproteins	NOV	nephroblastoma overexpressed gene	7885	insulin regular	indicated as an adjunct to diet and exercise to improve glycemic control in adults and children with type 1 and type 2 diabetes mellitus.	rs2071518	363.3	Chorioretinal scars	0.002286	1.547	0	0	0	NA	Novel	CCN3|IGFBP9	7885	P48745	NP_002505.1
Core matrisome	ECM Glycoproteins	NOV	nephroblastoma overexpressed gene	7885	insulin regular	indicated as an adjunct to diet and exercise to improve glycemic control in adults and children with type 1 and type 2 diabetes mellitus.	rs2071518	381.9	Otorrhea	0.009899	1.885	0	0	0	NA	Novel	CCN3|IGFBP9	7885	P48745	NP_002505.1
Core matrisome	ECM Glycoproteins	NOV	nephroblastoma overexpressed gene	7885	insulin regular	indicated as an adjunct to diet and exercise to improve glycemic control in adults and children with type 1 and type 2 diabetes mellitus.	rs2071518	384.4	Perforation of tympanic membrane	0.03816	1.392	0	0	0	NA	Novel	CCN3|IGFBP9	7885	P48745	NP_002505.1
Core matrisome	ECM Glycoproteins	NOV	nephroblastoma overexpressed gene	7885	insulin regular	indicated as an adjunct to diet and exercise to improve glycemic control in adults and children with type 1 and type 2 diabetes mellitus.	rs2071518	389.1	Sensorineural hearing loss	0.04368	1.087	0	0	0	NA	Novel	CCN3|IGFBP9	7885	P48745	NP_002505.1
Core matrisome	ECM Glycoproteins	NOV	nephroblastoma overexpressed gene	7885	insulin regular	indicated as an adjunct to diet and exercise to improve glycemic control in adults and children with type 1 and type 2 diabetes mellitus.	rs2071518	395.6	Heart valve replaced	0.01187	0.7529	0	0	0	NA	Novel	CCN3|IGFBP9	7885	P48745	NP_002505.1
Core matrisome	ECM Glycoproteins	NOV	nephroblastoma overexpressed gene	7885	insulin regular	indicated as an adjunct to diet and exercise to improve glycemic control in adults and children with type 1 and type 2 diabetes mellitus.	rs2071518	401.22	Hypertensive chronic kidney disease	0.0098	1.206	0	0	0	NA	Novel	CCN3|IGFBP9	7885	P48745	NP_002505.1
Core matrisome	ECM Glycoproteins	NOV	nephroblastoma overexpressed gene	7885	insulin regular	indicated as an adjunct to diet and exercise to improve glycemic control in adults and children with type 1 and type 2 diabetes mellitus.	rs2071518	411.2	Myocardial infarction	0.03743	1.109	0	0	0	NA	Novel	CCN3|IGFBP9	7885	P48745	NP_002505.1
Core matrisome	ECM Glycoproteins	NOV	nephroblastoma overexpressed gene	7885	insulin regular	indicated as an adjunct to diet and exercise to improve glycemic control in adults and children with type 1 and type 2 diabetes mellitus.	rs2071518	420.2	Pericarditis	0.04562	0.75	0	0	0	NA	Novel	CCN3|IGFBP9	7885	P48745	NP_002505.1
Core matrisome	ECM Glycoproteins	NOV	nephroblastoma overexpressed gene	7885	insulin regular	indicated as an adjunct to diet and exercise to improve glycemic control in adults and children with type 1 and type 2 diabetes mellitus.	rs2071518	452	Venous embolism & thrombosis	0.03644	0.8781	0	0	0	NA	Novel	CCN3|IGFBP9	7885	P48745	NP_002505.1
Core matrisome	ECM Glycoproteins	NOV	nephroblastoma overexpressed gene	7885	insulin regular	indicated as an adjunct to diet and exercise to improve glycemic control in adults and children with type 1 and type 2 diabetes mellitus.	rs2071518	459	Other disorders of circulatory system	0.01064	1.147	0	0	0	NA	Novel	CCN3|IGFBP9	7885	P48745	NP_002505.1
Core matrisome	ECM Glycoproteins	NOV	nephroblastoma overexpressed gene	7885	insulin regular	indicated as an adjunct to diet and exercise to improve glycemic control in adults and children with type 1 and type 2 diabetes mellitus.	rs2071518	459.1	Hemorrhage NOS	0.0147	1.612	0	0	0	NA	Novel	CCN3|IGFBP9	7885	P48745	NP_002505.1
Core matrisome	ECM Glycoproteins	NOV	nephroblastoma overexpressed gene	7885	insulin regular	indicated as an adjunct to diet and exercise to improve glycemic control in adults and children with type 1 and type 2 diabetes mellitus.	rs2071518	459.9	Circulatory disease NEC	0.03089	1.138	0	0	0	NA	Novel	CCN3|IGFBP9	7885	P48745	NP_002505.1
Core matrisome	ECM Glycoproteins	NOV	nephroblastoma overexpressed gene	7885	insulin regular	indicated as an adjunct to diet and exercise to improve glycemic control in adults and children with type 1 and type 2 diabetes mellitus.	rs2071518	465.2	Acute pharyngitis	0.03934	1.125	0	0	0	NA	Novel	CCN3|IGFBP9	7885	P48745	NP_002505.1
Core matrisome	ECM Glycoproteins	NOV	nephroblastoma overexpressed gene	7885	insulin regular	indicated as an adjunct to diet and exercise to improve glycemic control in adults and children with type 1 and type 2 diabetes mellitus.	rs2071518	507	Pleurisy; pleural effusion	0.0449	1.114	0	0	0	NA	Novel	CCN3|IGFBP9	7885	P48745	NP_002505.1
Core matrisome	ECM Glycoproteins	NOV	nephroblastoma overexpressed gene	7885	insulin regular	indicated as an adjunct to diet and exercise to improve glycemic control in adults and children with type 1 and type 2 diabetes mellitus.	rs2071518	526.5	Inflammatory conditions of jaw	0.02944	1.464	0	0	0	NA	Novel	CCN3|IGFBP9	7885	P48745	NP_002505.1
Core matrisome	ECM Glycoproteins	NOV	nephroblastoma overexpressed gene	7885	insulin regular	indicated as an adjunct to diet and exercise to improve glycemic control in adults and children with type 1 and type 2 diabetes mellitus.	rs2071518	527	Diseases of the salivary glands	0.01132	1.294	0	0	0	NA	Novel	CCN3|IGFBP9	7885	P48745	NP_002505.1
Core matrisome	ECM Glycoproteins	NOV	nephroblastoma overexpressed gene	7885	insulin regular	indicated as an adjunct to diet and exercise to improve glycemic control in adults and children with type 1 and type 2 diabetes mellitus.	rs2071518	527.8	Other specified diseases of the salivary glands	8.284e-4	1.972	0	0	0	NA	Novel	CCN3|IGFBP9	7885	P48745	NP_002505.1
Core matrisome	ECM Glycoproteins	NOV	nephroblastoma overexpressed gene	7885	insulin regular	indicated as an adjunct to diet and exercise to improve glycemic control in adults and children with type 1 and type 2 diabetes mellitus.	rs2071518	530.2	Esophageal bleeding	0.008697	0.5049	0	0	0	NA	Novel	CCN3|IGFBP9	7885	P48745	NP_002505.1
Core matrisome	ECM Glycoproteins	NOV	nephroblastoma overexpressed gene	7885	insulin regular	indicated as an adjunct to diet and exercise to improve glycemic control in adults and children with type 1 and type 2 diabetes mellitus.	rs2071518	536.7	Complications of gastrostomy, colostomy and enterostomy	0.01299	1.842	0	0	0	NA	Novel	CCN3|IGFBP9	7885	P48745	NP_002505.1
Core matrisome	ECM Glycoproteins	NOV	nephroblastoma overexpressed gene	7885	insulin regular	indicated as an adjunct to diet and exercise to improve glycemic control in adults and children with type 1 and type 2 diabetes mellitus.	rs2071518	557.9	Intestinal malabsorption NOS	0.01491	1.614	0	0	0	NA	Novel	CCN3|IGFBP9	7885	P48745	NP_002505.1
Core matrisome	ECM Glycoproteins	NOV	nephroblastoma overexpressed gene	7885	insulin regular	indicated as an adjunct to diet and exercise to improve glycemic control in adults and children with type 1 and type 2 diabetes mellitus.	rs2071518	560.4	Other intestinal obstruction	0.04385	1.198	0	0	0	NA	Novel	CCN3|IGFBP9	7885	P48745	NP_002505.1
Core matrisome	ECM Glycoproteins	NOV	nephroblastoma overexpressed gene	7885	insulin regular	indicated as an adjunct to diet and exercise to improve glycemic control in adults and children with type 1 and type 2 diabetes mellitus.	rs2071518	562	Diverticulosis and diverticulitis	0.0279	0.9089	0	0	0	NA	Novel	CCN3|IGFBP9	7885	P48745	NP_002505.1
Core matrisome	ECM Glycoproteins	NOV	nephroblastoma overexpressed gene	7885	insulin regular	indicated as an adjunct to diet and exercise to improve glycemic control in adults and children with type 1 and type 2 diabetes mellitus.	rs2071518	562.1	Diverticulosis	0.02377	0.9015	0	0	0	NA	Novel	CCN3|IGFBP9	7885	P48745	NP_002505.1
Core matrisome	ECM Glycoproteins	NOV	nephroblastoma overexpressed gene	7885	insulin regular	indicated as an adjunct to diet and exercise to improve glycemic control in adults and children with type 1 and type 2 diabetes mellitus.	rs2071518	568.1	Peritoneal adhesions (postoperative) (postinfection)	0.03526	1.432	0	0	0	NA	Novel	CCN3|IGFBP9	7885	P48745	NP_002505.1
Core matrisome	ECM Glycoproteins	NOV	nephroblastoma overexpressed gene	7885	insulin regular	indicated as an adjunct to diet and exercise to improve glycemic control in adults and children with type 1 and type 2 diabetes mellitus.	rs2071518	571.8	Liver abscess and sequelae of chronic liver disease	0.02415	0.6346	0	0	0	NA	Novel	CCN3|IGFBP9	7885	P48745	NP_002505.1
Core matrisome	ECM Glycoproteins	NOV	nephroblastoma overexpressed gene	7885	insulin regular	indicated as an adjunct to diet and exercise to improve glycemic control in adults and children with type 1 and type 2 diabetes mellitus.	rs2071518	572	Ascites (non malignant)	0.02746	0.7174	0	0	0	NA	Novel	CCN3|IGFBP9	7885	P48745	NP_002505.1
Core matrisome	ECM Glycoproteins	NOV	nephroblastoma overexpressed gene	7885	insulin regular	indicated as an adjunct to diet and exercise to improve glycemic control in adults and children with type 1 and type 2 diabetes mellitus.	rs2071518	574.3	Cholecystitis without cholelithiasis	0.03732	1.243	0	0	0	NA	Novel	CCN3|IGFBP9	7885	P48745	NP_002505.1
Core matrisome	ECM Glycoproteins	NOV	nephroblastoma overexpressed gene	7885	insulin regular	indicated as an adjunct to diet and exercise to improve glycemic control in adults and children with type 1 and type 2 diabetes mellitus.	rs2071518	596	Other disorders of bladder	0.03798	0.8748	0	0	0	NA	Novel	CCN3|IGFBP9	7885	P48745	NP_002505.1
Core matrisome	ECM Glycoproteins	NOV	nephroblastoma overexpressed gene	7885	insulin regular	indicated as an adjunct to diet and exercise to improve glycemic control in adults and children with type 1 and type 2 diabetes mellitus.	rs2071518	596.1	Bladder neck obstruction	0.009972	0.7705	0	0	0	NA	Novel	CCN3|IGFBP9	7885	P48745	NP_002505.1
Core matrisome	ECM Glycoproteins	NOV	nephroblastoma overexpressed gene	7885	insulin regular	indicated as an adjunct to diet and exercise to improve glycemic control in adults and children with type 1 and type 2 diabetes mellitus.	rs2071518	604	Disorders of penis	0.03252	0.7632	0	0	0	NA	Novel	CCN3|IGFBP9	7885	P48745	NP_002505.1
Core matrisome	ECM Glycoproteins	NOV	nephroblastoma overexpressed gene	7885	insulin regular	indicated as an adjunct to diet and exercise to improve glycemic control in adults and children with type 1 and type 2 diabetes mellitus.	rs2071518	604.1	Redundant prepuce and phimosis/BXO	0.02167	0.5876	0	0	0	NA	Novel	CCN3|IGFBP9	7885	P48745	NP_002505.1
Core matrisome	ECM Glycoproteins	NOV	nephroblastoma overexpressed gene	7885	insulin regular	indicated as an adjunct to diet and exercise to improve glycemic control in adults and children with type 1 and type 2 diabetes mellitus.	rs2071518	605	Erectile dysfunction	0.02419	0.8621	0	0	0	NA	Novel	CCN3|IGFBP9	7885	P48745	NP_002505.1
Core matrisome	ECM Glycoproteins	NOV	nephroblastoma overexpressed gene	7885	insulin regular	indicated as an adjunct to diet and exercise to improve glycemic control in adults and children with type 1 and type 2 diabetes mellitus.	rs2071518	702	Other dermatoses	0.01708	1.091	0	0	0	NA	Novel	CCN3|IGFBP9	7885	P48745	NP_002505.1
Core matrisome	ECM Glycoproteins	NOV	nephroblastoma overexpressed gene	7885	insulin regular	indicated as an adjunct to diet and exercise to improve glycemic control in adults and children with type 1 and type 2 diabetes mellitus.	rs2071518	702.1	Actinic keratosis	0.004984	1.124	0	0	0	NA	Novel	CCN3|IGFBP9	7885	P48745	NP_002505.1
Core matrisome	ECM Glycoproteins	NOV	nephroblastoma overexpressed gene	7885	insulin regular	indicated as an adjunct to diet and exercise to improve glycemic control in adults and children with type 1 and type 2 diabetes mellitus.	rs2071518	704.2	Hirsutism	5.093e-4	1.952	0	0	0	NA	Novel	CCN3|IGFBP9	7885	P48745	NP_002505.1
Core matrisome	ECM Glycoproteins	NOV	nephroblastoma overexpressed gene	7885	insulin regular	indicated as an adjunct to diet and exercise to improve glycemic control in adults and children with type 1 and type 2 diabetes mellitus.	rs2071518	716.2	Unspecified monoarthritis	0.04234	1.473	0	0	0	NA	Novel	CCN3|IGFBP9	7885	P48745	NP_002505.1
Core matrisome	ECM Glycoproteins	NOV	nephroblastoma overexpressed gene	7885	insulin regular	indicated as an adjunct to diet and exercise to improve glycemic control in adults and children with type 1 and type 2 diabetes mellitus.	rs2071518	722.9	Other and unspecified disc disorder	0.00187	0.5474	0	0	0	NA	Novel	CCN3|IGFBP9	7885	P48745	NP_002505.1
Core matrisome	ECM Glycoproteins	NOV	nephroblastoma overexpressed gene	7885	insulin regular	indicated as an adjunct to diet and exercise to improve glycemic control in adults and children with type 1 and type 2 diabetes mellitus.	rs2071518	756	Congenital musculoskeletal anomalies	0.04873	1.768	0	0	0	NA	Novel	CCN3|IGFBP9	7885	P48745	NP_002505.1
Core matrisome	ECM Glycoproteins	NOV	nephroblastoma overexpressed gene	7885	insulin regular	indicated as an adjunct to diet and exercise to improve glycemic control in adults and children with type 1 and type 2 diabetes mellitus.	rs2071518	783	Fever of unknown origin	0.03901	0.9109	0	0	0	NA	Novel	CCN3|IGFBP9	7885	P48745	NP_002505.1
Core matrisome	ECM Glycoproteins	NOV	nephroblastoma overexpressed gene	7885	insulin regular	indicated as an adjunct to diet and exercise to improve glycemic control in adults and children with type 1 and type 2 diabetes mellitus.	rs2071518	790	Nonspecific findings on examination of blood	0.04938	0.7916	0	0	0	NA	Novel	CCN3|IGFBP9	7885	P48745	NP_002505.1
Core matrisome	ECM Glycoproteins	NOV	nephroblastoma overexpressed gene	7885	insulin regular	indicated as an adjunct to diet and exercise to improve glycemic control in adults and children with type 1 and type 2 diabetes mellitus.	rs2071518	800.1	Fracture of neck of femur	0.01218	0.8178	0	0	0	NA	Novel	CCN3|IGFBP9	7885	P48745	NP_002505.1
Core matrisome	ECM Glycoproteins	NOV	nephroblastoma overexpressed gene	7885	insulin regular	indicated as an adjunct to diet and exercise to improve glycemic control in adults and children with type 1 and type 2 diabetes mellitus.	rs2071518	802	Fracture of pelvis	0.02052	0.7411	0	0	0	NA	Novel	CCN3|IGFBP9	7885	P48745	NP_002505.1
Core matrisome	ECM Glycoproteins	NOV	nephroblastoma overexpressed gene	7885	insulin regular	indicated as an adjunct to diet and exercise to improve glycemic control in adults and children with type 1 and type 2 diabetes mellitus.	rs2071518	803	Fracture of upper limb	0.03377	0.8852	0	0	0	NA	Novel	CCN3|IGFBP9	7885	P48745	NP_002505.1
Core matrisome	ECM Glycoproteins	NOV	nephroblastoma overexpressed gene	7885	insulin regular	indicated as an adjunct to diet and exercise to improve glycemic control in adults and children with type 1 and type 2 diabetes mellitus.	rs2071518	803.1	Fracture of humerus	0.008556	0.7728	0	0	0	NA	Novel	CCN3|IGFBP9	7885	P48745	NP_002505.1
Core matrisome	ECM Glycoproteins	NOV	nephroblastoma overexpressed gene	7885	insulin regular	indicated as an adjunct to diet and exercise to improve glycemic control in adults and children with type 1 and type 2 diabetes mellitus.	rs2071518	851	Complications of transplants and reattached limbs	0.01582	0.5849	0	0	0	NA	Novel	CCN3|IGFBP9	7885	P48745	NP_002505.1
Core matrisome	ECM Glycoproteins	NOV	nephroblastoma overexpressed gene	7885	insulin regular	indicated as an adjunct to diet and exercise to improve glycemic control in adults and children with type 1 and type 2 diabetes mellitus.	rs2071518	874	Complication of amputation stump	0.03965	0.5357	0	0	0	NA	Novel	CCN3|IGFBP9	7885	P48745	NP_002505.1
Core matrisome	ECM Glycoproteins	NOV	nephroblastoma overexpressed gene	7885	insulin regular	indicated as an adjunct to diet and exercise to improve glycemic control in adults and children with type 1 and type 2 diabetes mellitus.	rs2071518	966	Poisoning by anticonvulsants and anti-Parkinsonism drugs	0.0208	0.4952	0	0	0	NA	Novel	CCN3|IGFBP9	7885	P48745	NP_002505.1
Core matrisome	ECM Glycoproteins	NOV	nephroblastoma overexpressed gene	7885	insulin regular	indicated as an adjunct to diet and exercise to improve glycemic control in adults and children with type 1 and type 2 diabetes mellitus.	rs2071518	994	Sepsis and SIRS	0.006149	0.7551	0	0	0	NA	Novel	CCN3|IGFBP9	7885	P48745	NP_002505.1
Core matrisome	ECM Glycoproteins	NOV	nephroblastoma overexpressed gene	7885	insulin regular	indicated as an adjunct to diet and exercise to improve glycemic control in adults and children with type 1 and type 2 diabetes mellitus.	rs2071518	994.2	Sepsis	0.006178	0.7468	0	0	0	NA	Novel	CCN3|IGFBP9	7885	P48745	NP_002505.1
Core matrisome	ECM Glycoproteins	NOV	nephroblastoma overexpressed gene	7885	insulin, porcine	for the treatment of type i and ii diabetes mellitus.	rs2071518	38	Septicemia	0.003694	0.8145	0	0	0	NA	Novel	CCN3|IGFBP9	7885	P48745	NP_002505.1
Core matrisome	ECM Glycoproteins	NOV	nephroblastoma overexpressed gene	7885	insulin, porcine	for the treatment of type i and ii diabetes mellitus.	rs2071518	38.2	Gram positive septicemia	0.03994	0.6374	0	0	0	NA	Novel	CCN3|IGFBP9	7885	P48745	NP_002505.1
Core matrisome	ECM Glycoproteins	NOV	nephroblastoma overexpressed gene	7885	insulin, porcine	for the treatment of type i and ii diabetes mellitus.	rs2071518	38.3	Bacteremia	5.762e-4	0.6691	0	0	0	NA	Novel	CCN3|IGFBP9	7885	P48745	NP_002505.1
Core matrisome	ECM Glycoproteins	NOV	nephroblastoma overexpressed gene	7885	insulin, porcine	for the treatment of type i and ii diabetes mellitus.	rs2071518	41.12	Methicillin resistant Staphylococcus aureus	0.03062	0.5186	0	0	0	NA	Novel	CCN3|IGFBP9	7885	P48745	NP_002505.1
Core matrisome	ECM Glycoproteins	NOV	nephroblastoma overexpressed gene	7885	insulin, porcine	for the treatment of type i and ii diabetes mellitus.	rs2071518	41.2	Streptococcus infection	0.04693	0.7753	0	0	0	NA	Novel	CCN3|IGFBP9	7885	P48745	NP_002505.1
Core matrisome	ECM Glycoproteins	NOV	nephroblastoma overexpressed gene	7885	insulin, porcine	for the treatment of type i and ii diabetes mellitus.	rs2071518	136	Other infectious diseases	0.03531	0.5706	0	0	0	NA	Novel	CCN3|IGFBP9	7885	P48745	NP_002505.1
Core matrisome	ECM Glycoproteins	NOV	nephroblastoma overexpressed gene	7885	insulin, porcine	for the treatment of type i and ii diabetes mellitus.	rs2071518	191	Malignant neoplasm of brain and nervous system	0.009701	0.6558	0	0	0	NA	Novel	CCN3|IGFBP9	7885	P48745	NP_002505.1
Core matrisome	ECM Glycoproteins	NOV	nephroblastoma overexpressed gene	7885	insulin, porcine	for the treatment of type i and ii diabetes mellitus.	rs2071518	191.1	Cancer of brain and nervous system	0.006973	0.5322	0	0	0	NA	Novel	CCN3|IGFBP9	7885	P48745	NP_002505.1
Core matrisome	ECM Glycoproteins	NOV	nephroblastoma overexpressed gene	7885	insulin, porcine	for the treatment of type i and ii diabetes mellitus.	rs2071518	191.11	Brain cancer	0.007043	0.5094	0	0	0	NA	Novel	CCN3|IGFBP9	7885	P48745	NP_002505.1
Core matrisome	ECM Glycoproteins	NOV	nephroblastoma overexpressed gene	7885	insulin, porcine	for the treatment of type i and ii diabetes mellitus.	rs2071518	211	Benign neoplasm of other parts of digestive system	0.0163	0.7451	0	0	0	NA	Novel	CCN3|IGFBP9	7885	P48745	NP_002505.1
Core matrisome	ECM Glycoproteins	NOV	nephroblastoma overexpressed gene	7885	insulin, porcine	for the treatment of type i and ii diabetes mellitus.	rs2071518	250.15	Type 1 diabetic peripheral circulatory disorders	0.04979	0.5244	0	0	0	NA	Novel	CCN3|IGFBP9	7885	P48745	NP_002505.1
Core matrisome	ECM Glycoproteins	NOV	nephroblastoma overexpressed gene	7885	insulin, porcine	for the treatment of type i and ii diabetes mellitus.	rs2071518	255	Disorders of adrenal glands	0.0486	1.246	0	0	0	NA	Novel	CCN3|IGFBP9	7885	P48745	NP_002505.1
Core matrisome	ECM Glycoproteins	NOV	nephroblastoma overexpressed gene	7885	insulin, porcine	for the treatment of type i and ii diabetes mellitus.	rs2071518	260.5	Abnormal loss of weight and underweight	0.03174	0.7933	0	0	0	NA	Novel	CCN3|IGFBP9	7885	P48745	NP_002505.1
Core matrisome	ECM Glycoproteins	NOV	nephroblastoma overexpressed gene	7885	insulin, porcine	for the treatment of type i and ii diabetes mellitus.	rs2071518	261	Vitamin deficiency	0.003252	1.206	0	0	0	NA	Novel	CCN3|IGFBP9	7885	P48745	NP_002505.1
Core matrisome	ECM Glycoproteins	NOV	nephroblastoma overexpressed gene	7885	insulin, porcine	for the treatment of type i and ii diabetes mellitus.	rs2071518	261.2	Vitamin B-complex deficiencies	0.02276	1.205	0	0	0	NA	Novel	CCN3|IGFBP9	7885	P48745	NP_002505.1
Core matrisome	ECM Glycoproteins	NOV	nephroblastoma overexpressed gene	7885	insulin, porcine	for the treatment of type i and ii diabetes mellitus.	rs2071518	272	Disorders of lipoid metabolism	0.007057	1.103	0	0	0	NA	Novel	CCN3|IGFBP9	7885	P48745	NP_002505.1
Core matrisome	ECM Glycoproteins	NOV	nephroblastoma overexpressed gene	7885	insulin, porcine	for the treatment of type i and ii diabetes mellitus.	rs2071518	272.1	Hyperlipidemia	0.004743	1.109	0	0	0	NA	Novel	CCN3|IGFBP9	7885	P48745	NP_002505.1
Core matrisome	ECM Glycoproteins	NOV	nephroblastoma overexpressed gene	7885	insulin, porcine	for the treatment of type i and ii diabetes mellitus.	rs2071518	281.12	Vitamin B12 deficiency anemia	0.0308	1.433	0	0	0	NA	Novel	CCN3|IGFBP9	7885	P48745	NP_002505.1
Core matrisome	ECM Glycoproteins	NOV	nephroblastoma overexpressed gene	7885	insulin, porcine	for the treatment of type i and ii diabetes mellitus.	rs2071518	282	Hereditary hemolytic anemias	0.02495	0.5721	0	0	0	NA	Novel	CCN3|IGFBP9	7885	P48745	NP_002505.1
Core matrisome	ECM Glycoproteins	NOV	nephroblastoma overexpressed gene	7885	insulin, porcine	for the treatment of type i and ii diabetes mellitus.	rs2071518	282.9	Other hereditary hemolytic anemias	0.03797	0.4267	0	0	0	NA	Novel	CCN3|IGFBP9	7885	P48745	NP_002505.1
Core matrisome	ECM Glycoproteins	NOV	nephroblastoma overexpressed gene	7885	insulin, porcine	for the treatment of type i and ii diabetes mellitus.	rs2071518	283	Acquired hemolytic anemias	0.03036	0.4732	0	0	0	NA	Novel	CCN3|IGFBP9	7885	P48745	NP_002505.1
Core matrisome	ECM Glycoproteins	NOV	nephroblastoma overexpressed gene	7885	insulin, porcine	for the treatment of type i and ii diabetes mellitus.	rs2071518	286.1	Congenital coagulation defects	0.02799	0.5134	0	0	0	NA	Novel	CCN3|IGFBP9	7885	P48745	NP_002505.1
Core matrisome	ECM Glycoproteins	NOV	nephroblastoma overexpressed gene	7885	insulin, porcine	for the treatment of type i and ii diabetes mellitus.	rs2071518	286.12	Clotting factor deficiency	0.02008	0.3899	0	0	0	NA	Novel	CCN3|IGFBP9	7885	P48745	NP_002505.1
Core matrisome	ECM Glycoproteins	NOV	nephroblastoma overexpressed gene	7885	insulin, porcine	for the treatment of type i and ii diabetes mellitus.	rs2071518	287.31	Primary thrombocytopenia	0.03229	0.6166	0	0	0	NA	Novel	CCN3|IGFBP9	7885	P48745	NP_002505.1
Core matrisome	ECM Glycoproteins	NOV	nephroblastoma overexpressed gene	7885	insulin, porcine	for the treatment of type i and ii diabetes mellitus.	rs2071518	290.2	Delirium due to conditions classified elsewhere	0.01683	0.7107	0	0	0	NA	Novel	CCN3|IGFBP9	7885	P48745	NP_002505.1
Core matrisome	ECM Glycoproteins	NOV	nephroblastoma overexpressed gene	7885	insulin, porcine	for the treatment of type i and ii diabetes mellitus.	rs2071518	291	Other specified nonpsychotic and/or transient mental disorders	0.01264	0.8042	0	0	0	NA	Novel	CCN3|IGFBP9	7885	P48745	NP_002505.1
Core matrisome	ECM Glycoproteins	NOV	nephroblastoma overexpressed gene	7885	insulin, porcine	for the treatment of type i and ii diabetes mellitus.	rs2071518	291.4	Mental disorders due to brain damage	0.009218	0.792	0	0	0	NA	Novel	CCN3|IGFBP9	7885	P48745	NP_002505.1
Core matrisome	ECM Glycoproteins	NOV	nephroblastoma overexpressed gene	7885	insulin, porcine	for the treatment of type i and ii diabetes mellitus.	rs2071518	292.4	Altered mental status	0.02625	0.7863	0	0	0	NA	Novel	CCN3|IGFBP9	7885	P48745	NP_002505.1
Core matrisome	ECM Glycoproteins	NOV	nephroblastoma overexpressed gene	7885	insulin, porcine	for the treatment of type i and ii diabetes mellitus.	rs2071518	327.4	Insomnia	0.03593	0.8728	0	0	0	NA	Novel	CCN3|IGFBP9	7885	P48745	NP_002505.1
Core matrisome	ECM Glycoproteins	NOV	nephroblastoma overexpressed gene	7885	insulin, porcine	for the treatment of type i and ii diabetes mellitus.	rs2071518	348.1	Coma; stupor; and brain damage	0.003422	0.8269	0	0	0	NA	Novel	CCN3|IGFBP9	7885	P48745	NP_002505.1
Core matrisome	ECM Glycoproteins	NOV	nephroblastoma overexpressed gene	7885	insulin, porcine	for the treatment of type i and ii diabetes mellitus.	rs2071518	362.23	Cystoid macular degeneration of retina	0.01536	1.291	0	1	0	NA	Likely	CCN3|IGFBP9	7885	P48745	NP_002505.1
Core matrisome	ECM Glycoproteins	NOV	nephroblastoma overexpressed gene	7885	insulin, porcine	for the treatment of type i and ii diabetes mellitus.	rs2071518	363.3	Chorioretinal scars	0.002286	1.547	0	0	0	NA	Novel	CCN3|IGFBP9	7885	P48745	NP_002505.1
Core matrisome	ECM Glycoproteins	NOV	nephroblastoma overexpressed gene	7885	insulin, porcine	for the treatment of type i and ii diabetes mellitus.	rs2071518	381.9	Otorrhea	0.009899	1.885	0	0	0	NA	Novel	CCN3|IGFBP9	7885	P48745	NP_002505.1
Core matrisome	ECM Glycoproteins	NOV	nephroblastoma overexpressed gene	7885	insulin, porcine	for the treatment of type i and ii diabetes mellitus.	rs2071518	384.4	Perforation of tympanic membrane	0.03816	1.392	0	0	0	NA	Novel	CCN3|IGFBP9	7885	P48745	NP_002505.1
Core matrisome	ECM Glycoproteins	NOV	nephroblastoma overexpressed gene	7885	insulin, porcine	for the treatment of type i and ii diabetes mellitus.	rs2071518	389.1	Sensorineural hearing loss	0.04368	1.087	0	0	0	NA	Novel	CCN3|IGFBP9	7885	P48745	NP_002505.1
Core matrisome	ECM Glycoproteins	NOV	nephroblastoma overexpressed gene	7885	insulin, porcine	for the treatment of type i and ii diabetes mellitus.	rs2071518	395.6	Heart valve replaced	0.01187	0.7529	0	0	0	NA	Novel	CCN3|IGFBP9	7885	P48745	NP_002505.1
Core matrisome	ECM Glycoproteins	NOV	nephroblastoma overexpressed gene	7885	insulin, porcine	for the treatment of type i and ii diabetes mellitus.	rs2071518	401.22	Hypertensive chronic kidney disease	0.0098	1.206	0	0	0	NA	Novel	CCN3|IGFBP9	7885	P48745	NP_002505.1
Core matrisome	ECM Glycoproteins	NOV	nephroblastoma overexpressed gene	7885	insulin, porcine	for the treatment of type i and ii diabetes mellitus.	rs2071518	411.2	Myocardial infarction	0.03743	1.109	0	0	0	NA	Novel	CCN3|IGFBP9	7885	P48745	NP_002505.1
Core matrisome	ECM Glycoproteins	NOV	nephroblastoma overexpressed gene	7885	insulin, porcine	for the treatment of type i and ii diabetes mellitus.	rs2071518	420.2	Pericarditis	0.04562	0.75	0	0	0	NA	Novel	CCN3|IGFBP9	7885	P48745	NP_002505.1
Core matrisome	ECM Glycoproteins	NOV	nephroblastoma overexpressed gene	7885	insulin, porcine	for the treatment of type i and ii diabetes mellitus.	rs2071518	452	Venous embolism & thrombosis	0.03644	0.8781	0	0	0	NA	Novel	CCN3|IGFBP9	7885	P48745	NP_002505.1
Core matrisome	ECM Glycoproteins	NOV	nephroblastoma overexpressed gene	7885	insulin, porcine	for the treatment of type i and ii diabetes mellitus.	rs2071518	459	Other disorders of circulatory system	0.01064	1.147	0	0	0	NA	Novel	CCN3|IGFBP9	7885	P48745	NP_002505.1
Core matrisome	ECM Glycoproteins	NOV	nephroblastoma overexpressed gene	7885	insulin, porcine	for the treatment of type i and ii diabetes mellitus.	rs2071518	459.1	Hemorrhage NOS	0.0147	1.612	0	0	0	NA	Novel	CCN3|IGFBP9	7885	P48745	NP_002505.1
Core matrisome	ECM Glycoproteins	NOV	nephroblastoma overexpressed gene	7885	insulin, porcine	for the treatment of type i and ii diabetes mellitus.	rs2071518	459.9	Circulatory disease NEC	0.03089	1.138	0	0	0	NA	Novel	CCN3|IGFBP9	7885	P48745	NP_002505.1
Core matrisome	ECM Glycoproteins	NOV	nephroblastoma overexpressed gene	7885	insulin, porcine	for the treatment of type i and ii diabetes mellitus.	rs2071518	465.2	Acute pharyngitis	0.03934	1.125	0	0	0	NA	Novel	CCN3|IGFBP9	7885	P48745	NP_002505.1
Core matrisome	ECM Glycoproteins	NOV	nephroblastoma overexpressed gene	7885	insulin, porcine	for the treatment of type i and ii diabetes mellitus.	rs2071518	507	Pleurisy; pleural effusion	0.0449	1.114	0	0	0	NA	Novel	CCN3|IGFBP9	7885	P48745	NP_002505.1
Core matrisome	ECM Glycoproteins	NOV	nephroblastoma overexpressed gene	7885	insulin, porcine	for the treatment of type i and ii diabetes mellitus.	rs2071518	526.5	Inflammatory conditions of jaw	0.02944	1.464	0	0	0	NA	Novel	CCN3|IGFBP9	7885	P48745	NP_002505.1
Core matrisome	ECM Glycoproteins	NOV	nephroblastoma overexpressed gene	7885	insulin, porcine	for the treatment of type i and ii diabetes mellitus.	rs2071518	527	Diseases of the salivary glands	0.01132	1.294	0	0	0	NA	Novel	CCN3|IGFBP9	7885	P48745	NP_002505.1
Core matrisome	ECM Glycoproteins	NOV	nephroblastoma overexpressed gene	7885	insulin, porcine	for the treatment of type i and ii diabetes mellitus.	rs2071518	527.8	Other specified diseases of the salivary glands	8.284e-4	1.972	0	0	0	NA	Novel	CCN3|IGFBP9	7885	P48745	NP_002505.1
Core matrisome	ECM Glycoproteins	NOV	nephroblastoma overexpressed gene	7885	insulin, porcine	for the treatment of type i and ii diabetes mellitus.	rs2071518	530.2	Esophageal bleeding	0.008697	0.5049	0	0	0	NA	Novel	CCN3|IGFBP9	7885	P48745	NP_002505.1
Core matrisome	ECM Glycoproteins	NOV	nephroblastoma overexpressed gene	7885	insulin, porcine	for the treatment of type i and ii diabetes mellitus.	rs2071518	536.7	Complications of gastrostomy, colostomy and enterostomy	0.01299	1.842	0	0	0	NA	Novel	CCN3|IGFBP9	7885	P48745	NP_002505.1
Core matrisome	ECM Glycoproteins	NOV	nephroblastoma overexpressed gene	7885	insulin, porcine	for the treatment of type i and ii diabetes mellitus.	rs2071518	557.9	Intestinal malabsorption NOS	0.01491	1.614	0	0	0	NA	Novel	CCN3|IGFBP9	7885	P48745	NP_002505.1
Core matrisome	ECM Glycoproteins	NOV	nephroblastoma overexpressed gene	7885	insulin, porcine	for the treatment of type i and ii diabetes mellitus.	rs2071518	560.4	Other intestinal obstruction	0.04385	1.198	0	0	0	NA	Novel	CCN3|IGFBP9	7885	P48745	NP_002505.1
Core matrisome	ECM Glycoproteins	NOV	nephroblastoma overexpressed gene	7885	insulin, porcine	for the treatment of type i and ii diabetes mellitus.	rs2071518	562	Diverticulosis and diverticulitis	0.0279	0.9089	0	0	0	NA	Novel	CCN3|IGFBP9	7885	P48745	NP_002505.1
Core matrisome	ECM Glycoproteins	NOV	nephroblastoma overexpressed gene	7885	insulin, porcine	for the treatment of type i and ii diabetes mellitus.	rs2071518	562.1	Diverticulosis	0.02377	0.9015	0	0	0	NA	Novel	CCN3|IGFBP9	7885	P48745	NP_002505.1
Core matrisome	ECM Glycoproteins	NOV	nephroblastoma overexpressed gene	7885	insulin, porcine	for the treatment of type i and ii diabetes mellitus.	rs2071518	568.1	Peritoneal adhesions (postoperative) (postinfection)	0.03526	1.432	0	0	0	NA	Novel	CCN3|IGFBP9	7885	P48745	NP_002505.1
Core matrisome	ECM Glycoproteins	NOV	nephroblastoma overexpressed gene	7885	insulin, porcine	for the treatment of type i and ii diabetes mellitus.	rs2071518	571.8	Liver abscess and sequelae of chronic liver disease	0.02415	0.6346	0	0	0	NA	Novel	CCN3|IGFBP9	7885	P48745	NP_002505.1
Core matrisome	ECM Glycoproteins	NOV	nephroblastoma overexpressed gene	7885	insulin, porcine	for the treatment of type i and ii diabetes mellitus.	rs2071518	572	Ascites (non malignant)	0.02746	0.7174	0	0	0	NA	Novel	CCN3|IGFBP9	7885	P48745	NP_002505.1
Core matrisome	ECM Glycoproteins	NOV	nephroblastoma overexpressed gene	7885	insulin, porcine	for the treatment of type i and ii diabetes mellitus.	rs2071518	574.3	Cholecystitis without cholelithiasis	0.03732	1.243	0	0	0	NA	Novel	CCN3|IGFBP9	7885	P48745	NP_002505.1
Core matrisome	ECM Glycoproteins	NOV	nephroblastoma overexpressed gene	7885	insulin, porcine	for the treatment of type i and ii diabetes mellitus.	rs2071518	596	Other disorders of bladder	0.03798	0.8748	0	1	0	NA	Likely	CCN3|IGFBP9	7885	P48745	NP_002505.1
Core matrisome	ECM Glycoproteins	NOV	nephroblastoma overexpressed gene	7885	insulin, porcine	for the treatment of type i and ii diabetes mellitus.	rs2071518	596.1	Bladder neck obstruction	0.009972	0.7705	0	0	0	NA	Novel	CCN3|IGFBP9	7885	P48745	NP_002505.1
Core matrisome	ECM Glycoproteins	NOV	nephroblastoma overexpressed gene	7885	insulin, porcine	for the treatment of type i and ii diabetes mellitus.	rs2071518	604	Disorders of penis	0.03252	0.7632	0	0	0	NA	Novel	CCN3|IGFBP9	7885	P48745	NP_002505.1
Core matrisome	ECM Glycoproteins	NOV	nephroblastoma overexpressed gene	7885	insulin, porcine	for the treatment of type i and ii diabetes mellitus.	rs2071518	604.1	Redundant prepuce and phimosis/BXO	0.02167	0.5876	0	0	0	NA	Novel	CCN3|IGFBP9	7885	P48745	NP_002505.1
Core matrisome	ECM Glycoproteins	NOV	nephroblastoma overexpressed gene	7885	insulin, porcine	for the treatment of type i and ii diabetes mellitus.	rs2071518	605	Erectile dysfunction	0.02419	0.8621	0	0	0	NA	Novel	CCN3|IGFBP9	7885	P48745	NP_002505.1
Core matrisome	ECM Glycoproteins	NOV	nephroblastoma overexpressed gene	7885	insulin, porcine	for the treatment of type i and ii diabetes mellitus.	rs2071518	702	Other dermatoses	0.01708	1.091	0	0	0	NA	Novel	CCN3|IGFBP9	7885	P48745	NP_002505.1
Core matrisome	ECM Glycoproteins	NOV	nephroblastoma overexpressed gene	7885	insulin, porcine	for the treatment of type i and ii diabetes mellitus.	rs2071518	702.1	Actinic keratosis	0.004984	1.124	0	0	0	NA	Novel	CCN3|IGFBP9	7885	P48745	NP_002505.1
Core matrisome	ECM Glycoproteins	NOV	nephroblastoma overexpressed gene	7885	insulin, porcine	for the treatment of type i and ii diabetes mellitus.	rs2071518	704.2	Hirsutism	5.093e-4	1.952	0	0	0	NA	Novel	CCN3|IGFBP9	7885	P48745	NP_002505.1
Core matrisome	ECM Glycoproteins	NOV	nephroblastoma overexpressed gene	7885	insulin, porcine	for the treatment of type i and ii diabetes mellitus.	rs2071518	716.2	Unspecified monoarthritis	0.04234	1.473	0	0	0	NA	Novel	CCN3|IGFBP9	7885	P48745	NP_002505.1
Core matrisome	ECM Glycoproteins	NOV	nephroblastoma overexpressed gene	7885	insulin, porcine	for the treatment of type i and ii diabetes mellitus.	rs2071518	722.9	Other and unspecified disc disorder	0.00187	0.5474	0	0	0	NA	Novel	CCN3|IGFBP9	7885	P48745	NP_002505.1
Core matrisome	ECM Glycoproteins	NOV	nephroblastoma overexpressed gene	7885	insulin, porcine	for the treatment of type i and ii diabetes mellitus.	rs2071518	756	Congenital musculoskeletal anomalies	0.04873	1.768	0	0	0	NA	Novel	CCN3|IGFBP9	7885	P48745	NP_002505.1
Core matrisome	ECM Glycoproteins	NOV	nephroblastoma overexpressed gene	7885	insulin, porcine	for the treatment of type i and ii diabetes mellitus.	rs2071518	783	Fever of unknown origin	0.03901	0.9109	0	0	0	NA	Novel	CCN3|IGFBP9	7885	P48745	NP_002505.1
Core matrisome	ECM Glycoproteins	NOV	nephroblastoma overexpressed gene	7885	insulin, porcine	for the treatment of type i and ii diabetes mellitus.	rs2071518	790	Nonspecific findings on examination of blood	0.04938	0.7916	0	0	0	NA	Novel	CCN3|IGFBP9	7885	P48745	NP_002505.1
Core matrisome	ECM Glycoproteins	NOV	nephroblastoma overexpressed gene	7885	insulin, porcine	for the treatment of type i and ii diabetes mellitus.	rs2071518	800.1	Fracture of neck of femur	0.01218	0.8178	0	0	0	NA	Novel	CCN3|IGFBP9	7885	P48745	NP_002505.1
Core matrisome	ECM Glycoproteins	NOV	nephroblastoma overexpressed gene	7885	insulin, porcine	for the treatment of type i and ii diabetes mellitus.	rs2071518	802	Fracture of pelvis	0.02052	0.7411	0	0	0	NA	Novel	CCN3|IGFBP9	7885	P48745	NP_002505.1
Core matrisome	ECM Glycoproteins	NOV	nephroblastoma overexpressed gene	7885	insulin, porcine	for the treatment of type i and ii diabetes mellitus.	rs2071518	803	Fracture of upper limb	0.03377	0.8852	0	0	0	NA	Novel	CCN3|IGFBP9	7885	P48745	NP_002505.1
Core matrisome	ECM Glycoproteins	NOV	nephroblastoma overexpressed gene	7885	insulin, porcine	for the treatment of type i and ii diabetes mellitus.	rs2071518	803.1	Fracture of humerus	0.008556	0.7728	0	0	0	NA	Novel	CCN3|IGFBP9	7885	P48745	NP_002505.1
Core matrisome	ECM Glycoproteins	NOV	nephroblastoma overexpressed gene	7885	insulin, porcine	for the treatment of type i and ii diabetes mellitus.	rs2071518	851	Complications of transplants and reattached limbs	0.01582	0.5849	0	0	0	NA	Novel	CCN3|IGFBP9	7885	P48745	NP_002505.1
Core matrisome	ECM Glycoproteins	NOV	nephroblastoma overexpressed gene	7885	insulin, porcine	for the treatment of type i and ii diabetes mellitus.	rs2071518	874	Complication of amputation stump	0.03965	0.5357	0	0	0	NA	Novel	CCN3|IGFBP9	7885	P48745	NP_002505.1
Core matrisome	ECM Glycoproteins	NOV	nephroblastoma overexpressed gene	7885	insulin, porcine	for the treatment of type i and ii diabetes mellitus.	rs2071518	966	Poisoning by anticonvulsants and anti-Parkinsonism drugs	0.0208	0.4952	0	0	0	NA	Novel	CCN3|IGFBP9	7885	P48745	NP_002505.1
Core matrisome	ECM Glycoproteins	NOV	nephroblastoma overexpressed gene	7885	insulin, porcine	for the treatment of type i and ii diabetes mellitus.	rs2071518	994	Sepsis and SIRS	0.006149	0.7551	0	0	0	NA	Novel	CCN3|IGFBP9	7885	P48745	NP_002505.1
Core matrisome	ECM Glycoproteins	NOV	nephroblastoma overexpressed gene	7885	insulin, porcine	for the treatment of type i and ii diabetes mellitus.	rs2071518	994.2	Sepsis	0.006178	0.7468	0	0	0	NA	Novel	CCN3|IGFBP9	7885	P48745	NP_002505.1
Matrisome-associated	ECM Regulators	LPA	lipoprotein, Lp(a)	6667	aminocaproic acid	for use in the treatment of excessive postoperative bleeding.	rs6919346	41.1	Staphylococcus infections	0.04314	1.23	0	0	0	NA	Novel	AK38|APOA|LP	6667	P08519	NP_005568.2
Matrisome-associated	ECM Regulators	LPA	lipoprotein, Lp(a)	6667	aminocaproic acid	for use in the treatment of excessive postoperative bleeding.	rs6919346	54	Herpes simplex	0.03811	1.275	0	5	0	NA	Likely	AK38|APOA|LP	6667	P08519	NP_005568.2
Matrisome-associated	ECM Regulators	LPA	lipoprotein, Lp(a)	6667	aminocaproic acid	for use in the treatment of excessive postoperative bleeding.	rs6919346	80	Postoperative infection	0.01569	1.227	0	0	0	NA	Novel	AK38|APOA|LP	6667	P08519	NP_005568.2
Matrisome-associated	ECM Regulators	LPA	lipoprotein, Lp(a)	6667	aminocaproic acid	for use in the treatment of excessive postoperative bleeding.	rs6919346	110.11	Dermatophytosis of nail	0.03583	1.125	0	0	0	NA	Novel	AK38|APOA|LP	6667	P08519	NP_005568.2
Matrisome-associated	ECM Regulators	LPA	lipoprotein, Lp(a)	6667	aminocaproic acid	for use in the treatment of excessive postoperative bleeding.	rs6919346	136	Other infectious diseases	0.03254	0.4735	0	1	0	NA	Likely	AK38|APOA|LP	6667	P08519	NP_005568.2
Matrisome-associated	ECM Regulators	LPA	lipoprotein, Lp(a)	6667	aminocaproic acid	for use in the treatment of excessive postoperative bleeding.	rs6919346	212	Benign neoplasm of respiratory and intrathoracic organs	0.03433	1.633	0	0	0	NA	Novel	AK38|APOA|LP	6667	P08519	NP_005568.2
Matrisome-associated	ECM Regulators	LPA	lipoprotein, Lp(a)	6667	aminocaproic acid	for use in the treatment of excessive postoperative bleeding.	rs6919346	218	Benign neoplasm of uterus	0.02597	0.8035	0	3	0	NA	Likely	AK38|APOA|LP	6667	P08519	NP_005568.2
Matrisome-associated	ECM Regulators	LPA	lipoprotein, Lp(a)	6667	aminocaproic acid	for use in the treatment of excessive postoperative bleeding.	rs6919346	218.1	Uterine leiomyoma	0.02791	0.7942	0	10	0	NA	Likely	AK38|APOA|LP	6667	P08519	NP_005568.2
Matrisome-associated	ECM Regulators	LPA	lipoprotein, Lp(a)	6667	aminocaproic acid	for use in the treatment of excessive postoperative bleeding.	rs6919346	226	Benign neoplasm of thyroid glands	0.03603	1.64	0	0	0	NA	Novel	AK38|APOA|LP	6667	P08519	NP_005568.2
Matrisome-associated	ECM Regulators	LPA	lipoprotein, Lp(a)	6667	aminocaproic acid	for use in the treatment of excessive postoperative bleeding.	rs6919346	253.1	Pituitary hyperfunction	0.02659	0.2685	0	0	0	NA	Novel	AK38|APOA|LP	6667	P08519	NP_005568.2
Matrisome-associated	ECM Regulators	LPA	lipoprotein, Lp(a)	6667	aminocaproic acid	for use in the treatment of excessive postoperative bleeding.	rs6919346	253.2	Pituitary hypofunction	0.02338	0.3822	0	0	0	NA	Novel	AK38|APOA|LP	6667	P08519	NP_005568.2
Matrisome-associated	ECM Regulators	LPA	lipoprotein, Lp(a)	6667	aminocaproic acid	for use in the treatment of excessive postoperative bleeding.	rs6919346	255.2	Adrenal hypofunction	0.03612	1.543	0	0	0	NA	Novel	AK38|APOA|LP	6667	P08519	NP_005568.2
Matrisome-associated	ECM Regulators	LPA	lipoprotein, Lp(a)	6667	aminocaproic acid	for use in the treatment of excessive postoperative bleeding.	rs6919346	259	Other endocrine disorders	0.01343	1.569	0	0	0	NA	Novel	AK38|APOA|LP	6667	P08519	NP_005568.2
Matrisome-associated	ECM Regulators	LPA	lipoprotein, Lp(a)	6667	aminocaproic acid	for use in the treatment of excessive postoperative bleeding.	rs6919346	272.12	Hyperglyceridemia	0.02871	0.7935	0	0	0	NA	Novel	AK38|APOA|LP	6667	P08519	NP_005568.2
Matrisome-associated	ECM Regulators	LPA	lipoprotein, Lp(a)	6667	aminocaproic acid	for use in the treatment of excessive postoperative bleeding.	rs6919346	274.1	Gout	0.0386	0.8587	0	0	0	NA	Novel	AK38|APOA|LP	6667	P08519	NP_005568.2
Matrisome-associated	ECM Regulators	LPA	lipoprotein, Lp(a)	6667	aminocaproic acid	for use in the treatment of excessive postoperative bleeding.	rs6919346	276.5	Hypovolemia	0.03456	0.8852	0	0	0	NA	Novel	AK38|APOA|LP	6667	P08519	NP_005568.2
Matrisome-associated	ECM Regulators	LPA	lipoprotein, Lp(a)	6667	aminocaproic acid	for use in the treatment of excessive postoperative bleeding.	rs6919346	278	Overweight	0.02085	1.097	0	0	0	NA	Novel	AK38|APOA|LP	6667	P08519	NP_005568.2
Matrisome-associated	ECM Regulators	LPA	lipoprotein, Lp(a)	6667	aminocaproic acid	for use in the treatment of excessive postoperative bleeding.	rs6919346	278.1	Obesity	0.02073	1.103	0	0	0	NA	Novel	AK38|APOA|LP	6667	P08519	NP_005568.2
Matrisome-associated	ECM Regulators	LPA	lipoprotein, Lp(a)	6667	aminocaproic acid	for use in the treatment of excessive postoperative bleeding.	rs6919346	278.3	Localized adiposity	0.04037	1.736	0	0	0	NA	Novel	AK38|APOA|LP	6667	P08519	NP_005568.2
Matrisome-associated	ECM Regulators	LPA	lipoprotein, Lp(a)	6667	aminocaproic acid	for use in the treatment of excessive postoperative bleeding.	rs6919346	285	Other anemias	0.04095	0.9209	0	0	0	NA	Novel	AK38|APOA|LP	6667	P08519	NP_005568.2
Matrisome-associated	ECM Regulators	LPA	lipoprotein, Lp(a)	6667	aminocaproic acid	for use in the treatment of excessive postoperative bleeding.	rs6919346	286	Coagulation defects	0.02637	1.107	0	1	0	NA	Likely	AK38|APOA|LP	6667	P08519	NP_005568.2
Matrisome-associated	ECM Regulators	LPA	lipoprotein, Lp(a)	6667	aminocaproic acid	for use in the treatment of excessive postoperative bleeding.	rs6919346	286.5	Hemorrhagic disorder due to intrinsic circulating anticoagulants	0.01076	1.13	0	1	0	NA	Likely	AK38|APOA|LP	6667	P08519	NP_005568.2
Matrisome-associated	ECM Regulators	LPA	lipoprotein, Lp(a)	6667	aminocaproic acid	for use in the treatment of excessive postoperative bleeding.	rs6919346	287.1	Spontaneous ecchymoses	0.002224	1.813	0	0	0	NA	Novel	AK38|APOA|LP	6667	P08519	NP_005568.2
Matrisome-associated	ECM Regulators	LPA	lipoprotein, Lp(a)	6667	aminocaproic acid	for use in the treatment of excessive postoperative bleeding.	rs6919346	289.5	Diseases of spleen	0.03527	0.4355	0	15	0	NA	Likely	AK38|APOA|LP	6667	P08519	NP_005568.2
Matrisome-associated	ECM Regulators	LPA	lipoprotein, Lp(a)	6667	aminocaproic acid	for use in the treatment of excessive postoperative bleeding.	rs6919346	303.31	Gastrointestinal malfunction arising from mental factors	0.04701	1.756	0	0	0	NA	Novel	AK38|APOA|LP	6667	P08519	NP_005568.2
Matrisome-associated	ECM Regulators	LPA	lipoprotein, Lp(a)	6667	aminocaproic acid	for use in the treatment of excessive postoperative bleeding.	rs6919346	327.32	Obstructive sleep apnea	0.044	1.137	0	0	0	NA	Novel	AK38|APOA|LP	6667	P08519	NP_005568.2
Matrisome-associated	ECM Regulators	LPA	lipoprotein, Lp(a)	6667	aminocaproic acid	for use in the treatment of excessive postoperative bleeding.	rs6919346	337	Disorders of the autonomic nervous system	0.03951	1.282	0	0	0	NA	Novel	AK38|APOA|LP	6667	P08519	NP_005568.2
Matrisome-associated	ECM Regulators	LPA	lipoprotein, Lp(a)	6667	aminocaproic acid	for use in the treatment of excessive postoperative bleeding.	rs6919346	337.1	Peripheral autonomic neuropathy	0.006665	1.463	0	0	0	NA	Novel	AK38|APOA|LP	6667	P08519	NP_005568.2
Matrisome-associated	ECM Regulators	LPA	lipoprotein, Lp(a)	6667	aminocaproic acid	for use in the treatment of excessive postoperative bleeding.	rs6919346	352	Disorders of other cranial nerves	0.01493	1.301	0	0	0	NA	Novel	AK38|APOA|LP	6667	P08519	NP_005568.2
Matrisome-associated	ECM Regulators	LPA	lipoprotein, Lp(a)	6667	aminocaproic acid	for use in the treatment of excessive postoperative bleeding.	rs6919346	352.1	Trigeminal nerve disorders	0.03244	1.411	0	0	0	NA	Novel	AK38|APOA|LP	6667	P08519	NP_005568.2
Matrisome-associated	ECM Regulators	LPA	lipoprotein, Lp(a)	6667	aminocaproic acid	for use in the treatment of excessive postoperative bleeding.	rs6919346	362.26	Macular puckering of retina	0.03542	1.212	0	2	0	NA	Likely	AK38|APOA|LP	6667	P08519	NP_005568.2
Matrisome-associated	ECM Regulators	LPA	lipoprotein, Lp(a)	6667	aminocaproic acid	for use in the treatment of excessive postoperative bleeding.	rs6919346	368.2	Diplopia and disorders of binocular vision	0.02129	0.734	0	0	0	NA	Novel	AK38|APOA|LP	6667	P08519	NP_005568.2
Matrisome-associated	ECM Regulators	LPA	lipoprotein, Lp(a)	6667	aminocaproic acid	for use in the treatment of excessive postoperative bleeding.	rs6919346	374.1	Ectropion or entropion	0.03505	0.7776	0	0	0	NA	Novel	AK38|APOA|LP	6667	P08519	NP_005568.2
Matrisome-associated	ECM Regulators	LPA	lipoprotein, Lp(a)	6667	aminocaproic acid	for use in the treatment of excessive postoperative bleeding.	rs6919346	426.92	Cardiac defibrillator in situ	0.03878	1.375	0	137	3	NA	Strongly supported	AK38|APOA|LP	6667	P08519	NP_005568.2
Matrisome-associated	ECM Regulators	LPA	lipoprotein, Lp(a)	6667	aminocaproic acid	for use in the treatment of excessive postoperative bleeding.	rs6919346	429.3	Symptoms involving cardiovascular system	0.02694	0.849	0	1	0	NA	Likely	AK38|APOA|LP	6667	P08519	NP_005568.2
Matrisome-associated	ECM Regulators	LPA	lipoprotein, Lp(a)	6667	aminocaproic acid	for use in the treatment of excessive postoperative bleeding.	rs6919346	430.3	Subdural hemorrhage	0.008117	0.4606	0	0	0	NA	Novel	AK38|APOA|LP	6667	P08519	NP_005568.2
Matrisome-associated	ECM Regulators	LPA	lipoprotein, Lp(a)	6667	aminocaproic acid	for use in the treatment of excessive postoperative bleeding.	rs6919346	433.12	Cerebral atherosclerosis	0.03489	0.5347	0	0	0	NA	Novel	AK38|APOA|LP	6667	P08519	NP_005568.2
Matrisome-associated	ECM Regulators	LPA	lipoprotein, Lp(a)	6667	aminocaproic acid	for use in the treatment of excessive postoperative bleeding.	rs6919346	441	Vascular insufficiency of intestine	0.002504	1.544	0	2	0	NA	Likely	AK38|APOA|LP	6667	P08519	NP_005568.2
Matrisome-associated	ECM Regulators	LPA	lipoprotein, Lp(a)	6667	aminocaproic acid	for use in the treatment of excessive postoperative bleeding.	rs6919346	451.2	Phlebitis and thrombophlebitis of lower extremities	0.03913	1.226	0	1	0	NA	Likely	AK38|APOA|LP	6667	P08519	NP_005568.2
Matrisome-associated	ECM Regulators	LPA	lipoprotein, Lp(a)	6667	aminocaproic acid	for use in the treatment of excessive postoperative bleeding.	rs6919346	536.7	Complications of gastrostomy, colostomy and enterostomy	0.0496	1.701	0	0	0	NA	Novel	AK38|APOA|LP	6667	P08519	NP_005568.2
Matrisome-associated	ECM Regulators	LPA	lipoprotein, Lp(a)	6667	aminocaproic acid	for use in the treatment of excessive postoperative bleeding.	rs6919346	557	Intestinal malabsorption	0.00845	1.443	0	0	0	NA	Novel	AK38|APOA|LP	6667	P08519	NP_005568.2
Matrisome-associated	ECM Regulators	LPA	lipoprotein, Lp(a)	6667	aminocaproic acid	for use in the treatment of excessive postoperative bleeding.	rs6919346	557.9	Intestinal malabsorption NOS	0.04279	1.566	0	0	0	NA	Novel	AK38|APOA|LP	6667	P08519	NP_005568.2
Matrisome-associated	ECM Regulators	LPA	lipoprotein, Lp(a)	6667	aminocaproic acid	for use in the treatment of excessive postoperative bleeding.	rs6919346	568.1	Peritoneal adhesions (postoperative) (postinfection)	0.02329	1.529	0	0	0	NA	Novel	AK38|APOA|LP	6667	P08519	NP_005568.2
Matrisome-associated	ECM Regulators	LPA	lipoprotein, Lp(a)	6667	aminocaproic acid	for use in the treatment of excessive postoperative bleeding.	rs6919346	569	Other disorders of intestine	0.01663	1.206	0	2	0	NA	Likely	AK38|APOA|LP	6667	P08519	NP_005568.2
Matrisome-associated	ECM Regulators	LPA	lipoprotein, Lp(a)	6667	aminocaproic acid	for use in the treatment of excessive postoperative bleeding.	rs6919346	569.2	Gastrointestinal complications	0.003519	1.357	0	0	0	NA	Novel	AK38|APOA|LP	6667	P08519	NP_005568.2
Matrisome-associated	ECM Regulators	LPA	lipoprotein, Lp(a)	6667	aminocaproic acid	for use in the treatment of excessive postoperative bleeding.	rs6919346	573.3	Hepatomegaly	0.007022	1.836	0	0	0	NA	Novel	AK38|APOA|LP	6667	P08519	NP_005568.2
Matrisome-associated	ECM Regulators	LPA	lipoprotein, Lp(a)	6667	aminocaproic acid	for use in the treatment of excessive postoperative bleeding.	rs6919346	592.13	Chronic interstitial cystitis	0.01857	1.967	0	0	0	NA	Novel	AK38|APOA|LP	6667	P08519	NP_005568.2
Matrisome-associated	ECM Regulators	LPA	lipoprotein, Lp(a)	6667	aminocaproic acid	for use in the treatment of excessive postoperative bleeding.	rs6919346	597	Other disorders of urethra and urinary tract	0.02946	0.8065	0	4	0	NA	Likely	AK38|APOA|LP	6667	P08519	NP_005568.2
Matrisome-associated	ECM Regulators	LPA	lipoprotein, Lp(a)	6667	aminocaproic acid	for use in the treatment of excessive postoperative bleeding.	rs6919346	619.4	Noninflammatory disorders of vagina	0.0419	0.7223	0	1	0	NA	Likely	AK38|APOA|LP	6667	P08519	NP_005568.2
Matrisome-associated	ECM Regulators	LPA	lipoprotein, Lp(a)	6667	aminocaproic acid	for use in the treatment of excessive postoperative bleeding.	rs6919346	626.11	Absent or infrequent menstruation	0.04057	0.6295	0	5	0	NA	Likely	AK38|APOA|LP	6667	P08519	NP_005568.2
Matrisome-associated	ECM Regulators	LPA	lipoprotein, Lp(a)	6667	aminocaproic acid	for use in the treatment of excessive postoperative bleeding.	rs6919346	627.3	Postmenopausal atrophic vaginitis	0.04988	0.8132	0	0	0	NA	Novel	AK38|APOA|LP	6667	P08519	NP_005568.2
Matrisome-associated	ECM Regulators	LPA	lipoprotein, Lp(a)	6667	aminocaproic acid	for use in the treatment of excessive postoperative bleeding.	rs6919346	642	Hypertension complicating pregnancy	0.03186	1.893	0	0	0	NA	Novel	AK38|APOA|LP	6667	P08519	NP_005568.2
Matrisome-associated	ECM Regulators	LPA	lipoprotein, Lp(a)	6667	aminocaproic acid	for use in the treatment of excessive postoperative bleeding.	rs6919346	649	Other conditions of the mother complicating pregnancy	0.01423	1.689	0	1	0	NA	Likely	AK38|APOA|LP	6667	P08519	NP_005568.2
Matrisome-associated	ECM Regulators	LPA	lipoprotein, Lp(a)	6667	aminocaproic acid	for use in the treatment of excessive postoperative bleeding.	rs6919346	695.1	Toxic erythema	0.01617	2.012	0	0	0	NA	Novel	AK38|APOA|LP	6667	P08519	NP_005568.2
Matrisome-associated	ECM Regulators	LPA	lipoprotein, Lp(a)	6667	aminocaproic acid	for use in the treatment of excessive postoperative bleeding.	rs6919346	700	Corns and callosities	0.008421	1.194	0	0	0	NA	Novel	AK38|APOA|LP	6667	P08519	NP_005568.2
Matrisome-associated	ECM Regulators	LPA	lipoprotein, Lp(a)	6667	aminocaproic acid	for use in the treatment of excessive postoperative bleeding.	rs6919346	707	Chronic ulcer of skin	0.007671	1.161	0	0	0	NA	Novel	AK38|APOA|LP	6667	P08519	NP_005568.2
Matrisome-associated	ECM Regulators	LPA	lipoprotein, Lp(a)	6667	aminocaproic acid	for use in the treatment of excessive postoperative bleeding.	rs6919346	707.2	Chronic ulcer of leg or foot	0.007269	1.19	0	2	0	NA	Likely	AK38|APOA|LP	6667	P08519	NP_005568.2
Matrisome-associated	ECM Regulators	LPA	lipoprotein, Lp(a)	6667	aminocaproic acid	for use in the treatment of excessive postoperative bleeding.	rs6919346	707.3	Chronic ulcer of unspecified site	0.03809	1.257	0	0	0	NA	Novel	AK38|APOA|LP	6667	P08519	NP_005568.2
Matrisome-associated	ECM Regulators	LPA	lipoprotein, Lp(a)	6667	aminocaproic acid	for use in the treatment of excessive postoperative bleeding.	rs6919346	710.12	Chronic osteomyelitis	0.02451	0.5413	0	0	0	NA	Novel	AK38|APOA|LP	6667	P08519	NP_005568.2
Matrisome-associated	ECM Regulators	LPA	lipoprotein, Lp(a)	6667	aminocaproic acid	for use in the treatment of excessive postoperative bleeding.	rs6919346	720	Spinal stenosis	0.04544	1.123	0	0	0	NA	Novel	AK38|APOA|LP	6667	P08519	NP_005568.2
Matrisome-associated	ECM Regulators	LPA	lipoprotein, Lp(a)	6667	aminocaproic acid	for use in the treatment of excessive postoperative bleeding.	rs6919346	724.1	Disorders of sacrum	0.02715	1.245	0	1	0	NA	Likely	AK38|APOA|LP	6667	P08519	NP_005568.2
Matrisome-associated	ECM Regulators	LPA	lipoprotein, Lp(a)	6667	aminocaproic acid	for use in the treatment of excessive postoperative bleeding.	rs6919346	735.1	Flat foot	7.706e-4	1.425	0	0	0	NA	Novel	AK38|APOA|LP	6667	P08519	NP_005568.2
Matrisome-associated	ECM Regulators	LPA	lipoprotein, Lp(a)	6667	aminocaproic acid	for use in the treatment of excessive postoperative bleeding.	rs6919346	735.3	Hallux valgus (Bunion)	0.03836	1.176	0	0	0	NA	Novel	AK38|APOA|LP	6667	P08519	NP_005568.2
Matrisome-associated	ECM Regulators	LPA	lipoprotein, Lp(a)	6667	aminocaproic acid	for use in the treatment of excessive postoperative bleeding.	rs6919346	735.4	Acquired deformities of ankle and foot	1.084e-4	1.413	0	1	0	NA	Likely	AK38|APOA|LP	6667	P08519	NP_005568.2
Matrisome-associated	ECM Regulators	LPA	lipoprotein, Lp(a)	6667	aminocaproic acid	for use in the treatment of excessive postoperative bleeding.	rs6919346	747.1	Cardiac congenital anomalies	0.04036	1.287	0	137	3	NA	Strongly supported	AK38|APOA|LP	6667	P08519	NP_005568.2
Matrisome-associated	ECM Regulators	LPA	lipoprotein, Lp(a)	6667	aminocaproic acid	for use in the treatment of excessive postoperative bleeding.	rs6919346	790.8	Elevated C-reactive protein	0.01472	0.2839	0	0	0	NA	Novel	AK38|APOA|LP	6667	P08519	NP_005568.2
Matrisome-associated	ECM Regulators	LPA	lipoprotein, Lp(a)	6667	aminocaproic acid	for use in the treatment of excessive postoperative bleeding.	rs6919346	931	Contact dermatitis and other eczema due to plants [except food]	0.00605	1.851	0	0	0	NA	Novel	AK38|APOA|LP	6667	P08519	NP_005568.2
Matrisome-associated	ECM Regulators	LPA	lipoprotein, Lp(a)	6667	aminocaproic acid	for use in the treatment of excessive postoperative bleeding.	rs6919346	947	Urticaria	0.03251	1.233	0	2	0	NA	Likely	AK38|APOA|LP	6667	P08519	NP_005568.2
Matrisome-associated	ECM Regulators	LPA	lipoprotein, Lp(a)	6667	aminocaproic acid	for use in the treatment of excessive postoperative bleeding.	rs6919346	960.1	Adverse effects of antibacterials (not penicillins)	0.03462	0.4933	0	0	0	NA	Novel	AK38|APOA|LP	6667	P08519	NP_005568.2
Matrisome-associated	ECM Regulators	MMP24	matrix metallopeptidase 24 (membrane-inserted)	7172	marimastat	for the treatment of various cancers	rs1555322	41.4	E. coli	0.01544	1.383	0	0	0	NA	Novel	MMP25|MT-MMP5|MT5-MMP	7172	Q9Y5R2	NP_006681.1
Matrisome-associated	ECM Regulators	MMP24	matrix metallopeptidase 24 (membrane-inserted)	7172	marimastat	for the treatment of various cancers	rs1555322	54	Herpes simplex	0.006462	1.424	0	0	0	NA	Novel	MMP25|MT-MMP5|MT5-MMP	7172	Q9Y5R2	NP_006681.1
Matrisome-associated	ECM Regulators	MMP24	matrix metallopeptidase 24 (membrane-inserted)	7172	marimastat	for the treatment of various cancers	rs1555322	78	Viral warts & HPV	0.004217	1.234	0	0	0	NA	Novel	MMP25|MT-MMP5|MT5-MMP	7172	Q9Y5R2	NP_006681.1
Matrisome-associated	ECM Regulators	MMP24	matrix metallopeptidase 24 (membrane-inserted)	7172	marimastat	for the treatment of various cancers	rs1555322	79	Viral infection	0.03086	1.194	0	0	0	NA	Novel	MMP25|MT-MMP5|MT5-MMP	7172	Q9Y5R2	NP_006681.1
Matrisome-associated	ECM Regulators	MMP24	matrix metallopeptidase 24 (membrane-inserted)	7172	marimastat	for the treatment of various cancers	rs1555322	90	Sexually transmitted infections	0.04271	1.811	0	0	0	NA	Novel	MMP25|MT-MMP5|MT5-MMP	7172	Q9Y5R2	NP_006681.1
Matrisome-associated	ECM Regulators	MMP24	matrix metallopeptidase 24 (membrane-inserted)	7172	marimastat	for the treatment of various cancers	rs1555322	112	Candidiasis	0.04377	1.191	0	0	0	NA	Novel	MMP25|MT-MMP5|MT5-MMP	7172	Q9Y5R2	NP_006681.1
Matrisome-associated	ECM Regulators	MMP24	matrix metallopeptidase 24 (membrane-inserted)	7172	marimastat	for the treatment of various cancers	rs1555322	149	Cancer of the upper aerodigestive tract	0.009707	0.5838	1	91	3	NA	Known	MMP25|MT-MMP5|MT5-MMP	7172	Q9Y5R2	NP_006681.1
Matrisome-associated	ECM Regulators	MMP24	matrix metallopeptidase 24 (membrane-inserted)	7172	marimastat	for the treatment of various cancers	rs1555322	189.1	Cancer of kidney and renal pelvis	0.04947	0.7016	1	92	3	NA	Known	MMP25|MT-MMP5|MT5-MMP	7172	Q9Y5R2	NP_006681.1
Matrisome-associated	ECM Regulators	MMP24	matrix metallopeptidase 24 (membrane-inserted)	7172	marimastat	for the treatment of various cancers	rs1555322	189.11	Renal cell carcinoma	0.04095	0.6882	0	0	0	NA	Novel	MMP25|MT-MMP5|MT5-MMP	7172	Q9Y5R2	NP_006681.1
Matrisome-associated	ECM Regulators	MMP24	matrix metallopeptidase 24 (membrane-inserted)	7172	marimastat	for the treatment of various cancers	rs1555322	198	Secondary malignant neoplasm	0.04785	0.8498	0	0	0	NA	Novel	MMP25|MT-MMP5|MT5-MMP	7172	Q9Y5R2	NP_006681.1
Matrisome-associated	ECM Regulators	MMP24	matrix metallopeptidase 24 (membrane-inserted)	7172	marimastat	for the treatment of various cancers	rs1555322	198.6	Secondary malignancy of bone	0.0466	0.7091	0	7	0	NA	Likely	MMP25|MT-MMP5|MT5-MMP	7172	Q9Y5R2	NP_006681.1
Matrisome-associated	ECM Regulators	MMP24	matrix metallopeptidase 24 (membrane-inserted)	7172	marimastat	for the treatment of various cancers	rs1555322	200.1	Polycythemia vera	0.004147	2.061	0	0	0	NA	Novel	MMP25|MT-MMP5|MT5-MMP	7172	Q9Y5R2	NP_006681.1
Matrisome-associated	ECM Regulators	MMP24	matrix metallopeptidase 24 (membrane-inserted)	7172	marimastat	for the treatment of various cancers	rs1555322	210	Benign neoplasm of lip, oral cavity, and pharynx	0.009049	0.4426	0	0	0	NA	Novel	MMP25|MT-MMP5|MT5-MMP	7172	Q9Y5R2	NP_006681.1
Matrisome-associated	ECM Regulators	MMP24	matrix metallopeptidase 24 (membrane-inserted)	7172	marimastat	for the treatment of various cancers	rs1555322	240	Simple goiter	0.01619	1.287	0	0	0	NA	Novel	MMP25|MT-MMP5|MT5-MMP	7172	Q9Y5R2	NP_006681.1
Matrisome-associated	ECM Regulators	MMP24	matrix metallopeptidase 24 (membrane-inserted)	7172	marimastat	for the treatment of various cancers	rs1555322	242.2	Toxic multinodular goiter	9.998e-4	2.274	0	0	0	NA	Novel	MMP25|MT-MMP5|MT5-MMP	7172	Q9Y5R2	NP_006681.1
Matrisome-associated	ECM Regulators	MMP24	matrix metallopeptidase 24 (membrane-inserted)	7172	marimastat	for the treatment of various cancers	rs1555322	269	Proteinuria	0.01518	0.691	0	0	0	NA	Novel	MMP25|MT-MMP5|MT5-MMP	7172	Q9Y5R2	NP_006681.1
Matrisome-associated	ECM Regulators	MMP24	matrix metallopeptidase 24 (membrane-inserted)	7172	marimastat	for the treatment of various cancers	rs1555322	275.5	Calcium/phosphorus disorders	0.03866	1.206	0	0	0	NA	Novel	MMP25|MT-MMP5|MT5-MMP	7172	Q9Y5R2	NP_006681.1
Matrisome-associated	ECM Regulators	MMP24	matrix metallopeptidase 24 (membrane-inserted)	7172	marimastat	for the treatment of various cancers	rs1555322	287.1	Spontaneous ecchymoses	0.01617	0.4302	0	0	0	NA	Novel	MMP25|MT-MMP5|MT5-MMP	7172	Q9Y5R2	NP_006681.1
Matrisome-associated	ECM Regulators	MMP24	matrix metallopeptidase 24 (membrane-inserted)	7172	marimastat	for the treatment of various cancers	rs1555322	287.32	Secondary thrombocytopenia	0.02978	1.625	0	0	0	NA	Novel	MMP25|MT-MMP5|MT5-MMP	7172	Q9Y5R2	NP_006681.1
Matrisome-associated	ECM Regulators	MMP24	matrix metallopeptidase 24 (membrane-inserted)	7172	marimastat	for the treatment of various cancers	rs1555322	290.16	Vascular dementia	0.01686	0.6166	0	25	0	NA	Likely	MMP25|MT-MMP5|MT5-MMP	7172	Q9Y5R2	NP_006681.1
Matrisome-associated	ECM Regulators	MMP24	matrix metallopeptidase 24 (membrane-inserted)	7172	marimastat	for the treatment of various cancers	rs1555322	327	Sleep disorders	0.02344	1.127	0	0	0	NA	Novel	MMP25|MT-MMP5|MT5-MMP	7172	Q9Y5R2	NP_006681.1
Matrisome-associated	ECM Regulators	MMP24	matrix metallopeptidase 24 (membrane-inserted)	7172	marimastat	for the treatment of various cancers	rs1555322	327.4	Insomnia	0.02774	1.184	0	0	0	NA	Novel	MMP25|MT-MMP5|MT5-MMP	7172	Q9Y5R2	NP_006681.1
Matrisome-associated	ECM Regulators	MMP24	matrix metallopeptidase 24 (membrane-inserted)	7172	marimastat	for the treatment of various cancers	rs1555322	335	Multiple sclerosis	0.0157	1.603	0	1	0	Yes	Likely	MMP25|MT-MMP5|MT5-MMP	7172	Q9Y5R2	NP_006681.1
Matrisome-associated	ECM Regulators	MMP24	matrix metallopeptidase 24 (membrane-inserted)	7172	marimastat	for the treatment of various cancers	rs1555322	350.3	Lack of coordination	0.01045	1.32	0	0	0	NA	Novel	MMP25|MT-MMP5|MT5-MMP	7172	Q9Y5R2	NP_006681.1
Matrisome-associated	ECM Regulators	MMP24	matrix metallopeptidase 24 (membrane-inserted)	7172	marimastat	for the treatment of various cancers	rs1555322	353	Nerve root and plexus disorders	0.03774	0.7086	0	0	0	NA	Novel	MMP25|MT-MMP5|MT5-MMP	7172	Q9Y5R2	NP_006681.1
Matrisome-associated	ECM Regulators	MMP24	matrix metallopeptidase 24 (membrane-inserted)	7172	marimastat	for the treatment of various cancers	rs1555322	353.1	Nerve plexus lesions	0.008181	0.5196	0	9	0	NA	Likely	MMP25|MT-MMP5|MT5-MMP	7172	Q9Y5R2	NP_006681.1
Matrisome-associated	ECM Regulators	MMP24	matrix metallopeptidase 24 (membrane-inserted)	7172	marimastat	for the treatment of various cancers	rs1555322	360.3	Hypotony of eye	0.04115	1.946	0	5	0	NA	Likely	MMP25|MT-MMP5|MT5-MMP	7172	Q9Y5R2	NP_006681.1
Matrisome-associated	ECM Regulators	MMP24	matrix metallopeptidase 24 (membrane-inserted)	7172	marimastat	for the treatment of various cancers	rs1555322	368.2	Diplopia and disorders of binocular vision	0.02047	0.6975	0	0	0	NA	Novel	MMP25|MT-MMP5|MT5-MMP	7172	Q9Y5R2	NP_006681.1
Matrisome-associated	ECM Regulators	MMP24	matrix metallopeptidase 24 (membrane-inserted)	7172	marimastat	for the treatment of various cancers	rs1555322	371.1	Uveitis	0.04478	1.283	0	0	0	NA	Novel	MMP25|MT-MMP5|MT5-MMP	7172	Q9Y5R2	NP_006681.1
Matrisome-associated	ECM Regulators	MMP24	matrix metallopeptidase 24 (membrane-inserted)	7172	marimastat	for the treatment of various cancers	rs1555322	371.5	Keratoconjunctivitis, noninfectious	0.04945	0.6277	0	0	0	NA	Novel	MMP25|MT-MMP5|MT5-MMP	7172	Q9Y5R2	NP_006681.1
Matrisome-associated	ECM Regulators	MMP24	matrix metallopeptidase 24 (membrane-inserted)	7172	marimastat	for the treatment of various cancers	rs1555322	371.51	Keratoconjunctivitis sicca	0.02521	0.477	0	0	0	NA	Novel	MMP25|MT-MMP5|MT5-MMP	7172	Q9Y5R2	NP_006681.1
Matrisome-associated	ECM Regulators	MMP24	matrix metallopeptidase 24 (membrane-inserted)	7172	marimastat	for the treatment of various cancers	rs1555322	381.2	Eustachian tube disorders	0.01195	0.7167	0	0	0	NA	Novel	MMP25|MT-MMP5|MT5-MMP	7172	Q9Y5R2	NP_006681.1
Matrisome-associated	ECM Regulators	MMP24	matrix metallopeptidase 24 (membrane-inserted)	7172	marimastat	for the treatment of various cancers	rs1555322	381.3	Mastoiditis	0.02249	2.025	0	0	0	NA	Novel	MMP25|MT-MMP5|MT5-MMP	7172	Q9Y5R2	NP_006681.1
Matrisome-associated	ECM Regulators	MMP24	matrix metallopeptidase 24 (membrane-inserted)	7172	marimastat	for the treatment of various cancers	rs1555322	386	Vertiginous syndromes and other disorders of vestibular system	0.01313	1.125	0	0	0	NA	Novel	MMP25|MT-MMP5|MT5-MMP	7172	Q9Y5R2	NP_006681.1
Matrisome-associated	ECM Regulators	MMP24	matrix metallopeptidase 24 (membrane-inserted)	7172	marimastat	for the treatment of various cancers	rs1555322	386.9	Light-headedness and vertigo	0.01531	1.127	0	0	0	NA	Novel	MMP25|MT-MMP5|MT5-MMP	7172	Q9Y5R2	NP_006681.1
Matrisome-associated	ECM Regulators	MMP24	matrix metallopeptidase 24 (membrane-inserted)	7172	marimastat	for the treatment of various cancers	rs1555322	411	Ischemic Heart Disease	0.03363	1.097	0	0	0	NA	Novel	MMP25|MT-MMP5|MT5-MMP	7172	Q9Y5R2	NP_006681.1
Matrisome-associated	ECM Regulators	MMP24	matrix metallopeptidase 24 (membrane-inserted)	7172	marimastat	for the treatment of various cancers	rs1555322	411.4	Coronary atherosclerosis	0.04445	1.097	0	0	0	NA	Novel	MMP25|MT-MMP5|MT5-MMP	7172	Q9Y5R2	NP_006681.1
Matrisome-associated	ECM Regulators	MMP24	matrix metallopeptidase 24 (membrane-inserted)	7172	marimastat	for the treatment of various cancers	rs1555322	426.8	Other cardiac conduction disorders	0.006021	1.906	0	0	0	NA	Novel	MMP25|MT-MMP5|MT5-MMP	7172	Q9Y5R2	NP_006681.1
Matrisome-associated	ECM Regulators	MMP24	matrix metallopeptidase 24 (membrane-inserted)	7172	marimastat	for the treatment of various cancers	rs1555322	429.1	Heart transplant/surgery	0.027	1.46	0	2	0	NA	Likely	MMP25|MT-MMP5|MT5-MMP	7172	Q9Y5R2	NP_006681.1
Matrisome-associated	ECM Regulators	MMP24	matrix metallopeptidase 24 (membrane-inserted)	7172	marimastat	for the treatment of various cancers	rs1555322	452	Venous embolism & thrombosis	0.0273	1.183	0	1	0	NA	Likely	MMP25|MT-MMP5|MT5-MMP	7172	Q9Y5R2	NP_006681.1
Matrisome-associated	ECM Regulators	MMP24	matrix metallopeptidase 24 (membrane-inserted)	7172	marimastat	for the treatment of various cancers	rs1555322	480.12	Pseudomonal pneumonia	0.02977	2.06	0	0	0	NA	Novel	MMP25|MT-MMP5|MT5-MMP	7172	Q9Y5R2	NP_006681.1
Matrisome-associated	ECM Regulators	MMP24	matrix metallopeptidase 24 (membrane-inserted)	7172	marimastat	for the treatment of various cancers	rs1555322	480.5	Bronchopneumonia and lung abscess	0.03245	1.731	0	0	0	NA	Novel	MMP25|MT-MMP5|MT5-MMP	7172	Q9Y5R2	NP_006681.1
Matrisome-associated	ECM Regulators	MMP24	matrix metallopeptidase 24 (membrane-inserted)	7172	marimastat	for the treatment of various cancers	rs1555322	512	Wheezing and painful respiration	0.04195	1.136	0	0	0	NA	Novel	MMP25|MT-MMP5|MT5-MMP	7172	Q9Y5R2	NP_006681.1
Matrisome-associated	ECM Regulators	MMP24	matrix metallopeptidase 24 (membrane-inserted)	7172	marimastat	for the treatment of various cancers	rs1555322	512.2	Painful respiration	0.03048	1.17	0	0	0	NA	Novel	MMP25|MT-MMP5|MT5-MMP	7172	Q9Y5R2	NP_006681.1
Matrisome-associated	ECM Regulators	MMP24	matrix metallopeptidase 24 (membrane-inserted)	7172	marimastat	for the treatment of various cancers	rs1555322	516	Abnormal sputum	0.02968	1.342	0	0	0	NA	Novel	MMP25|MT-MMP5|MT5-MMP	7172	Q9Y5R2	NP_006681.1
Matrisome-associated	ECM Regulators	MMP24	matrix metallopeptidase 24 (membrane-inserted)	7172	marimastat	for the treatment of various cancers	rs1555322	519	Diseases of respiratory system	4.413e-4	1.299	0	0	0	NA	Novel	MMP25|MT-MMP5|MT5-MMP	7172	Q9Y5R2	NP_006681.1
Matrisome-associated	ECM Regulators	MMP24	matrix metallopeptidase 24 (membrane-inserted)	7172	marimastat	for the treatment of various cancers	rs1555322	519.8	Other diseases of respiratory system	0.005874	1.516	0	0	0	NA	Novel	MMP25|MT-MMP5|MT5-MMP	7172	Q9Y5R2	NP_006681.1
Matrisome-associated	ECM Regulators	MMP24	matrix metallopeptidase 24 (membrane-inserted)	7172	marimastat	for the treatment of various cancers	rs1555322	519.9	Symptoms involving respiratory system	0.04491	1.207	0	0	0	NA	Novel	MMP25|MT-MMP5|MT5-MMP	7172	Q9Y5R2	NP_006681.1
Matrisome-associated	ECM Regulators	MMP24	matrix metallopeptidase 24 (membrane-inserted)	7172	marimastat	for the treatment of various cancers	rs1555322	550.5	Ventral hernia	0.005433	0.6466	0	0	0	NA	Novel	MMP25|MT-MMP5|MT5-MMP	7172	Q9Y5R2	NP_006681.1
Matrisome-associated	ECM Regulators	MMP24	matrix metallopeptidase 24 (membrane-inserted)	7172	marimastat	for the treatment of various cancers	rs1555322	555	Inflammatory bowel disease	0.02026	1.368	0	0	0	NA	Novel	MMP25|MT-MMP5|MT5-MMP	7172	Q9Y5R2	NP_006681.1
Matrisome-associated	ECM Regulators	MMP24	matrix metallopeptidase 24 (membrane-inserted)	7172	marimastat	for the treatment of various cancers	rs1555322	555.2	Ulcerative colitis	0.02769	1.467	0	2	0	NA	Likely	MMP25|MT-MMP5|MT5-MMP	7172	Q9Y5R2	NP_006681.1
Matrisome-associated	ECM Regulators	MMP24	matrix metallopeptidase 24 (membrane-inserted)	7172	marimastat	for the treatment of various cancers	rs1555322	558	Noninfectious gastroenteritis	0.02836	1.181	0	0	0	NA	Novel	MMP25|MT-MMP5|MT5-MMP	7172	Q9Y5R2	NP_006681.1
Matrisome-associated	ECM Regulators	MMP24	matrix metallopeptidase 24 (membrane-inserted)	7172	marimastat	for the treatment of various cancers	rs1555322	559	Ileostomy status	0.02337	1.621	0	0	0	NA	Novel	MMP25|MT-MMP5|MT5-MMP	7172	Q9Y5R2	NP_006681.1
Matrisome-associated	ECM Regulators	MMP24	matrix metallopeptidase 24 (membrane-inserted)	7172	marimastat	for the treatment of various cancers	rs1555322	573.7	Abnormal results of function study of liver	0.04737	1.214	0	13	0	NA	Likely	MMP25|MT-MMP5|MT5-MMP	7172	Q9Y5R2	NP_006681.1
Matrisome-associated	ECM Regulators	MMP24	matrix metallopeptidase 24 (membrane-inserted)	7172	marimastat	for the treatment of various cancers	rs1555322	575.1	Cholangitis	0.03363	1.686	0	0	0	NA	Novel	MMP25|MT-MMP5|MT5-MMP	7172	Q9Y5R2	NP_006681.1
Matrisome-associated	ECM Regulators	MMP24	matrix metallopeptidase 24 (membrane-inserted)	7172	marimastat	for the treatment of various cancers	rs1555322	575.2	Obstruction of bile duct	0.01564	1.657	0	0	0	NA	Novel	MMP25|MT-MMP5|MT5-MMP	7172	Q9Y5R2	NP_006681.1
Matrisome-associated	ECM Regulators	MMP24	matrix metallopeptidase 24 (membrane-inserted)	7172	marimastat	for the treatment of various cancers	rs1555322	577.1	Acute pancreatitis	0.04203	0.7382	0	0	0	NA	Novel	MMP25|MT-MMP5|MT5-MMP	7172	Q9Y5R2	NP_006681.1
Matrisome-associated	ECM Regulators	MMP24	matrix metallopeptidase 24 (membrane-inserted)	7172	marimastat	for the treatment of various cancers	rs1555322	578.1	Hematemesis	0.03858	1.565	0	0	0	NA	Novel	MMP25|MT-MMP5|MT5-MMP	7172	Q9Y5R2	NP_006681.1
Matrisome-associated	ECM Regulators	MMP24	matrix metallopeptidase 24 (membrane-inserted)	7172	marimastat	for the treatment of various cancers	rs1555322	596.1	Bladder neck obstruction	0.04872	0.7645	0	0	0	NA	Novel	MMP25|MT-MMP5|MT5-MMP	7172	Q9Y5R2	NP_006681.1
Matrisome-associated	ECM Regulators	MMP24	matrix metallopeptidase 24 (membrane-inserted)	7172	marimastat	for the treatment of various cancers	rs1555322	619.1	Noninflammatory disorders of ovary, fallopian tube, & broad ligament	0.0433	1.549	0	3	0	NA	Likely	MMP25|MT-MMP5|MT5-MMP	7172	Q9Y5R2	NP_006681.1
Matrisome-associated	ECM Regulators	MMP24	matrix metallopeptidase 24 (membrane-inserted)	7172	marimastat	for the treatment of various cancers	rs1555322	626.8	Infertility, female	0.0257	1.794	0	2	0	NA	Likely	MMP25|MT-MMP5|MT5-MMP	7172	Q9Y5R2	NP_006681.1
Matrisome-associated	ECM Regulators	MMP24	matrix metallopeptidase 24 (membrane-inserted)	7172	marimastat	for the treatment of various cancers	rs1555322	627.3	Postmenopausal atrophic vaginitis	0.01427	1.304	0	0	0	NA	Novel	MMP25|MT-MMP5|MT5-MMP	7172	Q9Y5R2	NP_006681.1
Matrisome-associated	ECM Regulators	MMP24	matrix metallopeptidase 24 (membrane-inserted)	7172	marimastat	for the treatment of various cancers	rs1555322	695.1	Toxic erythema	0.006129	2.3	0	0	0	NA	Novel	MMP25|MT-MMP5|MT5-MMP	7172	Q9Y5R2	NP_006681.1
Matrisome-associated	ECM Regulators	MMP24	matrix metallopeptidase 24 (membrane-inserted)	7172	marimastat	for the treatment of various cancers	rs1555322	695.6	Prurigo	0.03388	0.7335	0	0	0	NA	Novel	MMP25|MT-MMP5|MT5-MMP	7172	Q9Y5R2	NP_006681.1
Matrisome-associated	ECM Regulators	MMP24	matrix metallopeptidase 24 (membrane-inserted)	7172	marimastat	for the treatment of various cancers	rs1555322	702	Other dermatoses	0.04656	0.9098	0	0	0	NA	Novel	MMP25|MT-MMP5|MT5-MMP	7172	Q9Y5R2	NP_006681.1
Matrisome-associated	ECM Regulators	MMP24	matrix metallopeptidase 24 (membrane-inserted)	7172	marimastat	for the treatment of various cancers	rs1555322	705.3	Hidradenitis	0.04634	1.936	0	0	0	NA	Novel	MMP25|MT-MMP5|MT5-MMP	7172	Q9Y5R2	NP_006681.1
Matrisome-associated	ECM Regulators	MMP24	matrix metallopeptidase 24 (membrane-inserted)	7172	marimastat	for the treatment of various cancers	rs1555322	706.1	Acne	0.02391	0.7128	0	0	0	NA	Novel	MMP25|MT-MMP5|MT5-MMP	7172	Q9Y5R2	NP_006681.1
Matrisome-associated	ECM Regulators	MMP24	matrix metallopeptidase 24 (membrane-inserted)	7172	marimastat	for the treatment of various cancers	rs1555322	740.12	Osteoarthrosis; localized, secondary	0.02937	0.509	0	0	0	NA	Novel	MMP25|MT-MMP5|MT5-MMP	7172	Q9Y5R2	NP_006681.1
Matrisome-associated	ECM Regulators	MMP24	matrix metallopeptidase 24 (membrane-inserted)	7172	marimastat	for the treatment of various cancers	rs1555322	752	Nervous system congenital anomalies	0.01062	1.518	0	1	0	NA	Likely	MMP25|MT-MMP5|MT5-MMP	7172	Q9Y5R2	NP_006681.1
Matrisome-associated	ECM Regulators	MMP24	matrix metallopeptidase 24 (membrane-inserted)	7172	marimastat	for the treatment of various cancers	rs1555322	753	Congenital anomalies of the eye	0.001898	1.384	0	5	0	NA	Likely	MMP25|MT-MMP5|MT5-MMP	7172	Q9Y5R2	NP_006681.1
Matrisome-associated	ECM Regulators	MMP24	matrix metallopeptidase 24 (membrane-inserted)	7172	marimastat	for the treatment of various cancers	rs1555322	753.1	Congenital cataract and lens anomalies	0.04115	0.3002	0	0	0	NA	Novel	MMP25|MT-MMP5|MT5-MMP	7172	Q9Y5R2	NP_006681.1
Matrisome-associated	ECM Regulators	MMP24	matrix metallopeptidase 24 (membrane-inserted)	7172	marimastat	for the treatment of various cancers	rs1555322	753.2	Congenital anomalies of posterior segment of eye	7.076e-4	1.509	0	5	0	NA	Likely	MMP25|MT-MMP5|MT5-MMP	7172	Q9Y5R2	NP_006681.1
Matrisome-associated	ECM Regulators	MMP24	matrix metallopeptidase 24 (membrane-inserted)	7172	marimastat	for the treatment of various cancers	rs1555322	755.6	Congenital anomalies of lower limb, including pelvic girdle	0.007905	1.951	0	0	0	NA	Novel	MMP25|MT-MMP5|MT5-MMP	7172	Q9Y5R2	NP_006681.1
Matrisome-associated	ECM Regulators	MMP24	matrix metallopeptidase 24 (membrane-inserted)	7172	marimastat	for the treatment of various cancers	rs1555322	782.3	Edema	0.02473	1.123	0	0	0	NA	Novel	MMP25|MT-MMP5|MT5-MMP	7172	Q9Y5R2	NP_006681.1
Matrisome-associated	ECM Regulators	MMP24	matrix metallopeptidase 24 (membrane-inserted)	7172	marimastat	for the treatment of various cancers	rs1555322	783	Fever of unknown origin	0.04165	1.121	0	0	0	NA	Novel	MMP25|MT-MMP5|MT5-MMP	7172	Q9Y5R2	NP_006681.1
Matrisome-associated	ECM Regulators	MMP24	matrix metallopeptidase 24 (membrane-inserted)	7172	marimastat	for the treatment of various cancers	rs1555322	790	Nonspecific findings on examination of blood	0.00745	1.411	0	0	0	NA	Novel	MMP25|MT-MMP5|MT5-MMP	7172	Q9Y5R2	NP_006681.1
Matrisome-associated	ECM Regulators	MMP24	matrix metallopeptidase 24 (membrane-inserted)	7172	marimastat	for the treatment of various cancers	rs1555322	795	Abnormal cytological, histological, immunological and DNA test findings	8.982e-4	2.245	0	0	0	NA	Novel	MMP25|MT-MMP5|MT5-MMP	7172	Q9Y5R2	NP_006681.1
Matrisome-associated	ECM Regulators	MMP24	matrix metallopeptidase 24 (membrane-inserted)	7172	marimastat	for the treatment of various cancers	rs1555322	795.8	Abnormal tumor markers, elevated CEA or CA 125	3.781e-4	2.744	0	0	0	NA	Novel	MMP25|MT-MMP5|MT5-MMP	7172	Q9Y5R2	NP_006681.1
Matrisome-associated	ECM Regulators	MMP24	matrix metallopeptidase 24 (membrane-inserted)	7172	marimastat	for the treatment of various cancers	rs1555322	800.1	Fracture of neck of femur	0.008234	1.281	0	6	0	NA	Likely	MMP25|MT-MMP5|MT5-MMP	7172	Q9Y5R2	NP_006681.1
Matrisome-associated	ECM Regulators	MMP24	matrix metallopeptidase 24 (membrane-inserted)	7172	marimastat	for the treatment of various cancers	rs1555322	913	Toxic effect of venom	0.03793	1.495	0	0	0	NA	Novel	MMP25|MT-MMP5|MT5-MMP	7172	Q9Y5R2	NP_006681.1
Matrisome-associated	ECM Regulators	MMP24	matrix metallopeptidase 24 (membrane-inserted)	7172	marimastat	for the treatment of various cancers	rs1555322	939	Atopic or contact dermatitis	0.04422	1.109	0	0	0	NA	Novel	MMP25|MT-MMP5|MT5-MMP	7172	Q9Y5R2	NP_006681.1
Matrisome-associated	ECM Regulators	PLG	plasminogen	9071	alteplase	for management of acute myocardial infarction, acute ischemic strok and for lysis of acute pulmonary emboli	rs783147	10	Tuberculosis	0.02059	1.749	0	0	0	NA	Novel	DKFZp779M0222	9071	A6PVI2:P00747:Q5TEH5	NP_000292.1:NP_001161810.1
Matrisome-associated	ECM Regulators	PLG	plasminogen	9071	alteplase	for management of acute myocardial infarction, acute ischemic strok and for lysis of acute pulmonary emboli	rs783147	189.12	Malignant neoplasm of renal pelvis	0.02822	0.5091	0	0	0	NA	Novel	DKFZp779M0222	9071	A6PVI2:P00747:Q5TEH5	NP_000292.1:NP_001161810.1
Matrisome-associated	ECM Regulators	PLG	plasminogen	9071	alteplase	for management of acute myocardial infarction, acute ischemic strok and for lysis of acute pulmonary emboli	rs783147	218.2	Benign neoplasm of uterus	0.03749	1.387	0	0	0	NA	Novel	DKFZp779M0222	9071	A6PVI2:P00747:Q5TEH5	NP_000292.1:NP_001161810.1
Matrisome-associated	ECM Regulators	PLG	plasminogen	9071	alteplase	for management of acute myocardial infarction, acute ischemic strok and for lysis of acute pulmonary emboli	rs783147	227	Benign neoplasm of other endocrine glands	0.01906	0.7381	0	0	0	NA	Novel	DKFZp779M0222	9071	A6PVI2:P00747:Q5TEH5	NP_000292.1:NP_001161810.1
Matrisome-associated	ECM Regulators	PLG	plasminogen	9071	alteplase	for management of acute myocardial infarction, acute ischemic strok and for lysis of acute pulmonary emboli	rs783147	275.1	Iron metabolism disorder	0.02589	1.665	0	0	0	NA	Novel	DKFZp779M0222	9071	A6PVI2:P00747:Q5TEH5	NP_000292.1:NP_001161810.1
Matrisome-associated	ECM Regulators	PLG	plasminogen	9071	alteplase	for management of acute myocardial infarction, acute ischemic strok and for lysis of acute pulmonary emboli	rs783147	276.41	Acidosis	0.03125	0.7718	0	0	0	NA	Novel	DKFZp779M0222	9071	A6PVI2:P00747:Q5TEH5	NP_000292.1:NP_001161810.1
Matrisome-associated	ECM Regulators	PLG	plasminogen	9071	alteplase	for management of acute myocardial infarction, acute ischemic strok and for lysis of acute pulmonary emboli	rs783147	276.6	Fluid overload	0.04878	0.8375	0	0	0	NA	Novel	DKFZp779M0222	9071	A6PVI2:P00747:Q5TEH5	NP_000292.1:NP_001161810.1
Matrisome-associated	ECM Regulators	PLG	plasminogen	9071	alteplase	for management of acute myocardial infarction, acute ischemic strok and for lysis of acute pulmonary emboli	rs783147	278.3	Localized adiposity	0.03098	1.678	0	0	0	NA	Novel	DKFZp779M0222	9071	A6PVI2:P00747:Q5TEH5	NP_000292.1:NP_001161810.1
Matrisome-associated	ECM Regulators	PLG	plasminogen	9071	alteplase	for management of acute myocardial infarction, acute ischemic strok and for lysis of acute pulmonary emboli	rs783147	286.8	Hypercoagulable state	0.01646	1.435	0	0	0	NA	Novel	DKFZp779M0222	9071	A6PVI2:P00747:Q5TEH5	NP_000292.1:NP_001161810.1
Matrisome-associated	ECM Regulators	PLG	plasminogen	9071	alteplase	for management of acute myocardial infarction, acute ischemic strok and for lysis of acute pulmonary emboli	rs783147	290.12	Dementia with cerebral degenerations	0.03115	1.415	0	0	0	NA	Novel	DKFZp779M0222	9071	A6PVI2:P00747:Q5TEH5	NP_000292.1:NP_001161810.1
Matrisome-associated	ECM Regulators	PLG	plasminogen	9071	alteplase	for management of acute myocardial infarction, acute ischemic strok and for lysis of acute pulmonary emboli	rs783147	300.11	Generalized anxiety disorder	0.007966	0.7736	0	0	0	NA	Novel	DKFZp779M0222	9071	A6PVI2:P00747:Q5TEH5	NP_000292.1:NP_001161810.1
Matrisome-associated	ECM Regulators	PLG	plasminogen	9071	alteplase	for management of acute myocardial infarction, acute ischemic strok and for lysis of acute pulmonary emboli	rs783147	303.31	Gastrointestinal malfunction arising from mental factors	0.02949	1.769	0	0	0	NA	Novel	DKFZp779M0222	9071	A6PVI2:P00747:Q5TEH5	NP_000292.1:NP_001161810.1
Matrisome-associated	ECM Regulators	PLG	plasminogen	9071	alteplase	for management of acute myocardial infarction, acute ischemic strok and for lysis of acute pulmonary emboli	rs783147	312	Conduct disorders	0.03156	1.424	0	0	0	NA	Novel	DKFZp779M0222	9071	A6PVI2:P00747:Q5TEH5	NP_000292.1:NP_001161810.1
Matrisome-associated	ECM Regulators	PLG	plasminogen	9071	alteplase	for management of acute myocardial infarction, acute ischemic strok and for lysis of acute pulmonary emboli	rs783147	327.31	Central/nonobstroctive sleep apnea	0.04476	1.45	0	0	0	NA	Novel	DKFZp779M0222	9071	A6PVI2:P00747:Q5TEH5	NP_000292.1:NP_001161810.1
Matrisome-associated	ECM Regulators	PLG	plasminogen	9071	alteplase	for management of acute myocardial infarction, acute ischemic strok and for lysis of acute pulmonary emboli	rs783147	327.4	Insomnia	0.03776	0.8895	0	0	0	NA	Novel	DKFZp779M0222	9071	A6PVI2:P00747:Q5TEH5	NP_000292.1:NP_001161810.1
Matrisome-associated	ECM Regulators	PLG	plasminogen	9071	alteplase	for management of acute myocardial infarction, acute ischemic strok and for lysis of acute pulmonary emboli	rs783147	339	Other headache syndromes	0.008379	1.099	0	0	0	NA	Novel	DKFZp779M0222	9071	A6PVI2:P00747:Q5TEH5	NP_000292.1:NP_001161810.1
Matrisome-associated	ECM Regulators	PLG	plasminogen	9071	alteplase	for management of acute myocardial infarction, acute ischemic strok and for lysis of acute pulmonary emboli	rs783147	350.5	Abnormal reflex	0.01302	2.06	0	3	1	NA	Strongly supported	DKFZp779M0222	9071	A6PVI2:P00747:Q5TEH5	NP_000292.1:NP_001161810.1
Matrisome-associated	ECM Regulators	PLG	plasminogen	9071	alteplase	for management of acute myocardial infarction, acute ischemic strok and for lysis of acute pulmonary emboli	rs783147	360	Disorders of the globe	0.02866	0.7331	0	0	0	NA	Novel	DKFZp779M0222	9071	A6PVI2:P00747:Q5TEH5	NP_000292.1:NP_001161810.1
Matrisome-associated	ECM Regulators	PLG	plasminogen	9071	alteplase	for management of acute myocardial infarction, acute ischemic strok and for lysis of acute pulmonary emboli	rs783147	360.2	progressive myopia	0.002508	0.509	0	10	0	NA	Likely	DKFZp779M0222	9071	A6PVI2:P00747:Q5TEH5	NP_000292.1:NP_001161810.1
Matrisome-associated	ECM Regulators	PLG	plasminogen	9071	alteplase	for management of acute myocardial infarction, acute ischemic strok and for lysis of acute pulmonary emboli	rs783147	362.26	Macular puckering of retina	0.04058	1.158	0	0	0	NA	Novel	DKFZp779M0222	9071	A6PVI2:P00747:Q5TEH5	NP_000292.1:NP_001161810.1
Matrisome-associated	ECM Regulators	PLG	plasminogen	9071	alteplase	for management of acute myocardial infarction, acute ischemic strok and for lysis of acute pulmonary emboli	rs783147	366.1	Nonsenile Cataract	0.01302	0.744	0	0	0	NA	Novel	DKFZp779M0222	9071	A6PVI2:P00747:Q5TEH5	NP_000292.1:NP_001161810.1
Matrisome-associated	ECM Regulators	PLG	plasminogen	9071	alteplase	for management of acute myocardial infarction, acute ischemic strok and for lysis of acute pulmonary emboli	rs783147	367	Disorders of refraction and accommodation	0.04751	0.9309	0	0	0	NA	Novel	DKFZp779M0222	9071	A6PVI2:P00747:Q5TEH5	NP_000292.1:NP_001161810.1
Matrisome-associated	ECM Regulators	PLG	plasminogen	9071	alteplase	for management of acute myocardial infarction, acute ischemic strok and for lysis of acute pulmonary emboli	rs783147	367.9	Blindness and low vision	0.01465	0.7842	0	159	7	NA	Strongly supported	DKFZp779M0222	9071	A6PVI2:P00747:Q5TEH5	NP_000292.1:NP_001161810.1
Matrisome-associated	ECM Regulators	PLG	plasminogen	9071	alteplase	for management of acute myocardial infarction, acute ischemic strok and for lysis of acute pulmonary emboli	rs783147	385	Other disorders of middle ear and mastoid	0.03163	0.7359	0	0	0	NA	Novel	DKFZp779M0222	9071	A6PVI2:P00747:Q5TEH5	NP_000292.1:NP_001161810.1
Matrisome-associated	ECM Regulators	PLG	plasminogen	9071	alteplase	for management of acute myocardial infarction, acute ischemic strok and for lysis of acute pulmonary emboli	rs783147	411.41	Aneurysm and dissection of heart	0.03332	1.71	0	105	4	NA	Strongly supported	DKFZp779M0222	9071	A6PVI2:P00747:Q5TEH5	NP_000292.1:NP_001161810.1
Matrisome-associated	ECM Regulators	PLG	plasminogen	9071	alteplase	for management of acute myocardial infarction, acute ischemic strok and for lysis of acute pulmonary emboli	rs783147	416	Cardiomegaly	0.02991	0.8912	0	0	0	NA	Novel	DKFZp779M0222	9071	A6PVI2:P00747:Q5TEH5	NP_000292.1:NP_001161810.1
Matrisome-associated	ECM Regulators	PLG	plasminogen	9071	alteplase	for management of acute myocardial infarction, acute ischemic strok and for lysis of acute pulmonary emboli	rs783147	427.7	Tachycardia NOS	0.04458	0.878	0	18	0	NA	Likely	DKFZp779M0222	9071	A6PVI2:P00747:Q5TEH5	NP_000292.1:NP_001161810.1
Matrisome-associated	ECM Regulators	PLG	plasminogen	9071	alteplase	for management of acute myocardial infarction, acute ischemic strok and for lysis of acute pulmonary emboli	rs783147	428.2	Heart failure NOS	0.02398	0.8083	0	34	0	NA	Likely	DKFZp779M0222	9071	A6PVI2:P00747:Q5TEH5	NP_000292.1:NP_001161810.1
Matrisome-associated	ECM Regulators	PLG	plasminogen	9071	alteplase	for management of acute myocardial infarction, acute ischemic strok and for lysis of acute pulmonary emboli	rs783147	429	Ill-defined descriptions and complications of heart disease	0.04698	0.9242	0	9	1	NA	Strongly supported	DKFZp779M0222	9071	A6PVI2:P00747:Q5TEH5	NP_000292.1:NP_001161810.1
Matrisome-associated	ECM Regulators	PLG	plasminogen	9071	alteplase	for management of acute myocardial infarction, acute ischemic strok and for lysis of acute pulmonary emboli	rs783147	429.3	Symptoms involving cardiovascular system	0.01501	0.8744	0	0	0	NA	Novel	DKFZp779M0222	9071	A6PVI2:P00747:Q5TEH5	NP_000292.1:NP_001161810.1
Matrisome-associated	ECM Regulators	PLG	plasminogen	9071	alteplase	for management of acute myocardial infarction, acute ischemic strok and for lysis of acute pulmonary emboli	rs783147	433.1	Occlusion and stenosis of precerebral arteries	0.0227	0.8983	0	30	0	NA	Likely	DKFZp779M0222	9071	A6PVI2:P00747:Q5TEH5	NP_000292.1:NP_001161810.1
Matrisome-associated	ECM Regulators	PLG	plasminogen	9071	alteplase	for management of acute myocardial infarction, acute ischemic strok and for lysis of acute pulmonary emboli	rs783147	443.9	Peripheral arterial disease	0.0395	0.9137	0	2	0	NA	Likely	DKFZp779M0222	9071	A6PVI2:P00747:Q5TEH5	NP_000292.1:NP_001161810.1
Matrisome-associated	ECM Regulators	PLG	plasminogen	9071	alteplase	for management of acute myocardial infarction, acute ischemic strok and for lysis of acute pulmonary emboli	rs783147	473.1	Chronic laryngitis	0.02936	1.692	0	0	0	NA	Novel	DKFZp779M0222	9071	A6PVI2:P00747:Q5TEH5	NP_000292.1:NP_001161810.1
Matrisome-associated	ECM Regulators	PLG	plasminogen	9071	alteplase	for management of acute myocardial infarction, acute ischemic strok and for lysis of acute pulmonary emboli	rs783147	497	Bronchitis	0.03885	0.9051	0	0	0	NA	Novel	DKFZp779M0222	9071	A6PVI2:P00747:Q5TEH5	NP_000292.1:NP_001161810.1
Matrisome-associated	ECM Regulators	PLG	plasminogen	9071	alteplase	for management of acute myocardial infarction, acute ischemic strok and for lysis of acute pulmonary emboli	rs783147	510.1	Lung involvement in conditions classified elsewhere	0.03946	1.716	0	1	0	NA	Likely	DKFZp779M0222	9071	A6PVI2:P00747:Q5TEH5	NP_000292.1:NP_001161810.1
Matrisome-associated	ECM Regulators	PLG	plasminogen	9071	alteplase	for management of acute myocardial infarction, acute ischemic strok and for lysis of acute pulmonary emboli	rs783147	516	Abnormal sputum	0.04862	1.221	0	0	0	NA	Novel	DKFZp779M0222	9071	A6PVI2:P00747:Q5TEH5	NP_000292.1:NP_001161810.1
Matrisome-associated	ECM Regulators	PLG	plasminogen	9071	alteplase	for management of acute myocardial infarction, acute ischemic strok and for lysis of acute pulmonary emboli	rs783147	530	Diseases of esophagus	0.02616	1.069	0	0	0	NA	Novel	DKFZp779M0222	9071	A6PVI2:P00747:Q5TEH5	NP_000292.1:NP_001161810.1
Matrisome-associated	ECM Regulators	PLG	plasminogen	9071	alteplase	for management of acute myocardial infarction, acute ischemic strok and for lysis of acute pulmonary emboli	rs783147	530.11	GERD	0.0356	1.07	0	0	0	NA	Novel	DKFZp779M0222	9071	A6PVI2:P00747:Q5TEH5	NP_000292.1:NP_001161810.1
Matrisome-associated	ECM Regulators	PLG	plasminogen	9071	alteplase	for management of acute myocardial infarction, acute ischemic strok and for lysis of acute pulmonary emboli	rs783147	535	Gastritis and duodenitis	0.006081	1.144	0	0	0	NA	Novel	DKFZp779M0222	9071	A6PVI2:P00747:Q5TEH5	NP_000292.1:NP_001161810.1
Matrisome-associated	ECM Regulators	PLG	plasminogen	9071	alteplase	for management of acute myocardial infarction, acute ischemic strok and for lysis of acute pulmonary emboli	rs783147	535.8	Other specified gastritis	0.04039	1.195	0	0	0	NA	Novel	DKFZp779M0222	9071	A6PVI2:P00747:Q5TEH5	NP_000292.1:NP_001161810.1
Matrisome-associated	ECM Regulators	PLG	plasminogen	9071	alteplase	for management of acute myocardial infarction, acute ischemic strok and for lysis of acute pulmonary emboli	rs783147	550	Abdominal hernia	0.02804	1.077	0	13	0	NA	Likely	DKFZp779M0222	9071	A6PVI2:P00747:Q5TEH5	NP_000292.1:NP_001161810.1
Matrisome-associated	ECM Regulators	PLG	plasminogen	9071	alteplase	for management of acute myocardial infarction, acute ischemic strok and for lysis of acute pulmonary emboli	rs783147	550.4	Umbilical hernia	0.001594	1.322	0	5	0	NA	Likely	DKFZp779M0222	9071	A6PVI2:P00747:Q5TEH5	NP_000292.1:NP_001161810.1
Matrisome-associated	ECM Regulators	PLG	plasminogen	9071	alteplase	for management of acute myocardial infarction, acute ischemic strok and for lysis of acute pulmonary emboli	rs783147	550.6	Incisional hernia	0.003328	1.326	0	0	0	NA	Novel	DKFZp779M0222	9071	A6PVI2:P00747:Q5TEH5	NP_000292.1:NP_001161810.1
Matrisome-associated	ECM Regulators	PLG	plasminogen	9071	alteplase	for management of acute myocardial infarction, acute ischemic strok and for lysis of acute pulmonary emboli	rs783147	557	Intestinal malabsorption	0.01877	1.313	0	0	0	NA	Novel	DKFZp779M0222	9071	A6PVI2:P00747:Q5TEH5	NP_000292.1:NP_001161810.1
Matrisome-associated	ECM Regulators	PLG	plasminogen	9071	alteplase	for management of acute myocardial infarction, acute ischemic strok and for lysis of acute pulmonary emboli	rs783147	557.1	Celiac or tropical sprue	0.01914	1.63	0	0	0	NA	Novel	DKFZp779M0222	9071	A6PVI2:P00747:Q5TEH5	NP_000292.1:NP_001161810.1
Matrisome-associated	ECM Regulators	PLG	plasminogen	9071	alteplase	for management of acute myocardial infarction, acute ischemic strok and for lysis of acute pulmonary emboli	rs783147	557.11	Celiac disease	0.0322	1.577	0	0	0	NA	Novel	DKFZp779M0222	9071	A6PVI2:P00747:Q5TEH5	NP_000292.1:NP_001161810.1
Matrisome-associated	ECM Regulators	PLG	plasminogen	9071	alteplase	for management of acute myocardial infarction, acute ischemic strok and for lysis of acute pulmonary emboli	rs783147	557.9	Intestinal malabsorption NOS	0.02064	1.548	0	0	0	NA	Novel	DKFZp779M0222	9071	A6PVI2:P00747:Q5TEH5	NP_000292.1:NP_001161810.1
Matrisome-associated	ECM Regulators	PLG	plasminogen	9071	alteplase	for management of acute myocardial infarction, acute ischemic strok and for lysis of acute pulmonary emboli	rs783147	561	Symptoms involving digestive system	0.02343	1.181	0	0	0	NA	Novel	DKFZp779M0222	9071	A6PVI2:P00747:Q5TEH5	NP_000292.1:NP_001161810.1
Matrisome-associated	ECM Regulators	PLG	plasminogen	9071	alteplase	for management of acute myocardial infarction, acute ischemic strok and for lysis of acute pulmonary emboli	rs783147	585.2	Renal failure NOS	0.03035	0.7946	0	6	0	NA	Likely	DKFZp779M0222	9071	A6PVI2:P00747:Q5TEH5	NP_000292.1:NP_001161810.1
Matrisome-associated	ECM Regulators	PLG	plasminogen	9071	alteplase	for management of acute myocardial infarction, acute ischemic strok and for lysis of acute pulmonary emboli	rs783147	586.4	Stricture/obstruction of ureter	0.0141	0.6961	0	0	0	NA	Novel	DKFZp779M0222	9071	A6PVI2:P00747:Q5TEH5	NP_000292.1:NP_001161810.1
Matrisome-associated	ECM Regulators	PLG	plasminogen	9071	alteplase	for management of acute myocardial infarction, acute ischemic strok and for lysis of acute pulmonary emboli	rs783147	595	Hydronephrosis	0.03584	0.79990000000000006	0	1	0	NA	Likely	DKFZp779M0222	9071	A6PVI2:P00747:Q5TEH5	NP_000292.1:NP_001161810.1
Matrisome-associated	ECM Regulators	PLG	plasminogen	9071	alteplase	for management of acute myocardial infarction, acute ischemic strok and for lysis of acute pulmonary emboli	rs783147	596.5	Functional disorders of bladder	0.02041	1.253	0	2	0	NA	Likely	DKFZp779M0222	9071	A6PVI2:P00747:Q5TEH5	NP_000292.1:NP_001161810.1
Matrisome-associated	ECM Regulators	PLG	plasminogen	9071	alteplase	for management of acute myocardial infarction, acute ischemic strok and for lysis of acute pulmonary emboli	rs783147	598.4	Other cells and casts in urine	0.01652	0.7195	0	0	0	NA	Novel	DKFZp779M0222	9071	A6PVI2:P00747:Q5TEH5	NP_000292.1:NP_001161810.1
Matrisome-associated	ECM Regulators	PLG	plasminogen	9071	alteplase	for management of acute myocardial infarction, acute ischemic strok and for lysis of acute pulmonary emboli	rs783147	614.53	Cyst or abscess of Bartholin's gland	0.04431	1.659	0	2	0	NA	Likely	DKFZp779M0222	9071	A6PVI2:P00747:Q5TEH5	NP_000292.1:NP_001161810.1
Matrisome-associated	ECM Regulators	PLG	plasminogen	9071	alteplase	for management of acute myocardial infarction, acute ischemic strok and for lysis of acute pulmonary emboli	rs783147	619.4	Noninflammatory disorders of vagina	0.02176	0.7728	0	0	0	NA	Novel	DKFZp779M0222	9071	A6PVI2:P00747:Q5TEH5	NP_000292.1:NP_001161810.1
Matrisome-associated	ECM Regulators	PLG	plasminogen	9071	alteplase	for management of acute myocardial infarction, acute ischemic strok and for lysis of acute pulmonary emboli	rs783147	686.3	Pilonidal cyst	0.009994	0.4506	0	0	0	NA	Novel	DKFZp779M0222	9071	A6PVI2:P00747:Q5TEH5	NP_000292.1:NP_001161810.1
Matrisome-associated	ECM Regulators	PLG	plasminogen	9071	alteplase	for management of acute myocardial infarction, acute ischemic strok and for lysis of acute pulmonary emboli	rs783147	695.6	Prurigo	0.01933	0.8033	0	0	0	NA	Novel	DKFZp779M0222	9071	A6PVI2:P00747:Q5TEH5	NP_000292.1:NP_001161810.1
Matrisome-associated	ECM Regulators	PLG	plasminogen	9071	alteplase	for management of acute myocardial infarction, acute ischemic strok and for lysis of acute pulmonary emboli	rs783147	696	Psoriasis & related disorders	0.02901	1.182	0	144	1	NA	Strongly supported	DKFZp779M0222	9071	A6PVI2:P00747:Q5TEH5	NP_000292.1:NP_001161810.1
Matrisome-associated	ECM Regulators	PLG	plasminogen	9071	alteplase	for management of acute myocardial infarction, acute ischemic strok and for lysis of acute pulmonary emboli	rs783147	709	Diffuse diseases of connective tissue	0.02748	1.21	0	0	0	NA	Novel	DKFZp779M0222	9071	A6PVI2:P00747:Q5TEH5	NP_000292.1:NP_001161810.1
Matrisome-associated	ECM Regulators	PLG	plasminogen	9071	alteplase	for management of acute myocardial infarction, acute ischemic strok and for lysis of acute pulmonary emboli	rs783147	732	Osteochondropathies	0.02197	0.5637	0	0	0	NA	Novel	DKFZp779M0222	9071	A6PVI2:P00747:Q5TEH5	NP_000292.1:NP_001161810.1
Matrisome-associated	ECM Regulators	PLG	plasminogen	9071	alteplase	for management of acute myocardial infarction, acute ischemic strok and for lysis of acute pulmonary emboli	rs783147	736.2	Acquired deformities of finger	0.03938	0.748	0	2	0	NA	Likely	DKFZp779M0222	9071	A6PVI2:P00747:Q5TEH5	NP_000292.1:NP_001161810.1
Matrisome-associated	ECM Regulators	PLG	plasminogen	9071	alteplase	for management of acute myocardial infarction, acute ischemic strok and for lysis of acute pulmonary emboli	rs783147	736.6	Unequal leg length (acquired)	0.03822	1.338	0	0	0	NA	Novel	DKFZp779M0222	9071	A6PVI2:P00747:Q5TEH5	NP_000292.1:NP_001161810.1
Matrisome-associated	ECM Regulators	PLG	plasminogen	9071	alteplase	for management of acute myocardial infarction, acute ischemic strok and for lysis of acute pulmonary emboli	rs783147	743.12	Behcet's syndrome	0.007743	0.6422	0	0	0	NA	Novel	DKFZp779M0222	9071	A6PVI2:P00747:Q5TEH5	NP_000292.1:NP_001161810.1
Matrisome-associated	ECM Regulators	PLG	plasminogen	9071	alteplase	for management of acute myocardial infarction, acute ischemic strok and for lysis of acute pulmonary emboli	rs783147	801	Fracture of ankle and foot	0.029	0.8949	0	4	1	NA	Strongly supported	DKFZp779M0222	9071	A6PVI2:P00747:Q5TEH5	NP_000292.1:NP_001161810.1
Matrisome-associated	ECM Regulators	PLG	plasminogen	9071	alteplase	for management of acute myocardial infarction, acute ischemic strok and for lysis of acute pulmonary emboli	rs783147	855	Mechanical complication of nervous system device, implant, and graft	0.03239	1.716	0	0	0	NA	Novel	DKFZp779M0222	9071	A6PVI2:P00747:Q5TEH5	NP_000292.1:NP_001161810.1
Matrisome-associated	ECM Regulators	PLG	plasminogen	9071	alteplase	for management of acute myocardial infarction, acute ischemic strok and for lysis of acute pulmonary emboli	rs783147	870.4	Open wound of nose and sinus	0.005933	2.074	0	9	1	NA	Strongly supported	DKFZp779M0222	9071	A6PVI2:P00747:Q5TEH5	NP_000292.1:NP_001161810.1
Matrisome-associated	ECM Regulators	PLG	plasminogen	9071	alteplase	for management of acute myocardial infarction, acute ischemic strok and for lysis of acute pulmonary emboli	rs783147	871.1	Open wound of hand except finger(s)	0.0363	0.8239	0	11	0	NA	Likely	DKFZp779M0222	9071	A6PVI2:P00747:Q5TEH5	NP_000292.1:NP_001161810.1
Matrisome-associated	ECM Regulators	PLG	plasminogen	9071	alteplase	for management of acute myocardial infarction, acute ischemic strok and for lysis of acute pulmonary emboli	rs783147	941	Allergy to serum or vaccine	0.01722	1.633	0	3	0	NA	Likely	DKFZp779M0222	9071	A6PVI2:P00747:Q5TEH5	NP_000292.1:NP_001161810.1
Matrisome-associated	ECM Regulators	PLG	plasminogen	9071	aminocaproic acid	for use in the treatment of excessive postoperative bleeding.	rs783147	10	Tuberculosis	0.02059	1.749	0	3	0	NA	Likely	DKFZp779M0222	9071	A6PVI2:P00747:Q5TEH5	NP_000292.1:NP_001161810.1
Matrisome-associated	ECM Regulators	PLG	plasminogen	9071	aminocaproic acid	for use in the treatment of excessive postoperative bleeding.	rs783147	189.12	Malignant neoplasm of renal pelvis	0.02822	0.5091	0	1	0	NA	Likely	DKFZp779M0222	9071	A6PVI2:P00747:Q5TEH5	NP_000292.1:NP_001161810.1
Matrisome-associated	ECM Regulators	PLG	plasminogen	9071	aminocaproic acid	for use in the treatment of excessive postoperative bleeding.	rs783147	218.2	Benign neoplasm of uterus	0.03749	1.387	0	3	0	NA	Likely	DKFZp779M0222	9071	A6PVI2:P00747:Q5TEH5	NP_000292.1:NP_001161810.1
Matrisome-associated	ECM Regulators	PLG	plasminogen	9071	aminocaproic acid	for use in the treatment of excessive postoperative bleeding.	rs783147	227	Benign neoplasm of other endocrine glands	0.01906	0.7381	0	0	0	NA	Novel	DKFZp779M0222	9071	A6PVI2:P00747:Q5TEH5	NP_000292.1:NP_001161810.1
Matrisome-associated	ECM Regulators	PLG	plasminogen	9071	aminocaproic acid	for use in the treatment of excessive postoperative bleeding.	rs783147	275.1	Iron metabolism disorder	0.02589	1.665	0	0	0	NA	Novel	DKFZp779M0222	9071	A6PVI2:P00747:Q5TEH5	NP_000292.1:NP_001161810.1
Matrisome-associated	ECM Regulators	PLG	plasminogen	9071	aminocaproic acid	for use in the treatment of excessive postoperative bleeding.	rs783147	276.41	Acidosis	0.03125	0.7718	0	0	0	NA	Novel	DKFZp779M0222	9071	A6PVI2:P00747:Q5TEH5	NP_000292.1:NP_001161810.1
Matrisome-associated	ECM Regulators	PLG	plasminogen	9071	aminocaproic acid	for use in the treatment of excessive postoperative bleeding.	rs783147	276.6	Fluid overload	0.04878	0.8375	0	0	0	NA	Novel	DKFZp779M0222	9071	A6PVI2:P00747:Q5TEH5	NP_000292.1:NP_001161810.1
Matrisome-associated	ECM Regulators	PLG	plasminogen	9071	aminocaproic acid	for use in the treatment of excessive postoperative bleeding.	rs783147	278.3	Localized adiposity	0.03098	1.678	0	0	0	NA	Novel	DKFZp779M0222	9071	A6PVI2:P00747:Q5TEH5	NP_000292.1:NP_001161810.1
Matrisome-associated	ECM Regulators	PLG	plasminogen	9071	aminocaproic acid	for use in the treatment of excessive postoperative bleeding.	rs783147	286.8	Hypercoagulable state	0.01646	1.435	0	0	0	NA	Novel	DKFZp779M0222	9071	A6PVI2:P00747:Q5TEH5	NP_000292.1:NP_001161810.1
Matrisome-associated	ECM Regulators	PLG	plasminogen	9071	aminocaproic acid	for use in the treatment of excessive postoperative bleeding.	rs783147	290.12	Dementia with cerebral degenerations	0.03115	1.415	0	3	0	NA	Likely	DKFZp779M0222	9071	A6PVI2:P00747:Q5TEH5	NP_000292.1:NP_001161810.1
Matrisome-associated	ECM Regulators	PLG	plasminogen	9071	aminocaproic acid	for use in the treatment of excessive postoperative bleeding.	rs783147	300.11	Generalized anxiety disorder	0.007966	0.7736	0	0	0	NA	Novel	DKFZp779M0222	9071	A6PVI2:P00747:Q5TEH5	NP_000292.1:NP_001161810.1
Matrisome-associated	ECM Regulators	PLG	plasminogen	9071	aminocaproic acid	for use in the treatment of excessive postoperative bleeding.	rs783147	303.31	Gastrointestinal malfunction arising from mental factors	0.02949	1.769	0	0	0	NA	Novel	DKFZp779M0222	9071	A6PVI2:P00747:Q5TEH5	NP_000292.1:NP_001161810.1
Matrisome-associated	ECM Regulators	PLG	plasminogen	9071	aminocaproic acid	for use in the treatment of excessive postoperative bleeding.	rs783147	312	Conduct disorders	0.03156	1.424	0	0	0	NA	Novel	DKFZp779M0222	9071	A6PVI2:P00747:Q5TEH5	NP_000292.1:NP_001161810.1
Matrisome-associated	ECM Regulators	PLG	plasminogen	9071	aminocaproic acid	for use in the treatment of excessive postoperative bleeding.	rs783147	327.31	Central/nonobstroctive sleep apnea	0.04476	1.45	0	0	0	NA	Novel	DKFZp779M0222	9071	A6PVI2:P00747:Q5TEH5	NP_000292.1:NP_001161810.1
Matrisome-associated	ECM Regulators	PLG	plasminogen	9071	aminocaproic acid	for use in the treatment of excessive postoperative bleeding.	rs783147	327.4	Insomnia	0.03776	0.8895	0	0	0	NA	Novel	DKFZp779M0222	9071	A6PVI2:P00747:Q5TEH5	NP_000292.1:NP_001161810.1
Matrisome-associated	ECM Regulators	PLG	plasminogen	9071	aminocaproic acid	for use in the treatment of excessive postoperative bleeding.	rs783147	339	Other headache syndromes	0.008379	1.099	0	0	0	NA	Novel	DKFZp779M0222	9071	A6PVI2:P00747:Q5TEH5	NP_000292.1:NP_001161810.1
Matrisome-associated	ECM Regulators	PLG	plasminogen	9071	aminocaproic acid	for use in the treatment of excessive postoperative bleeding.	rs783147	350.5	Abnormal reflex	0.01302	2.06	0	26	1	NA	Strongly supported	DKFZp779M0222	9071	A6PVI2:P00747:Q5TEH5	NP_000292.1:NP_001161810.1
Matrisome-associated	ECM Regulators	PLG	plasminogen	9071	aminocaproic acid	for use in the treatment of excessive postoperative bleeding.	rs783147	360	Disorders of the globe	0.02866	0.7331	0	5	0	NA	Likely	DKFZp779M0222	9071	A6PVI2:P00747:Q5TEH5	NP_000292.1:NP_001161810.1
Matrisome-associated	ECM Regulators	PLG	plasminogen	9071	aminocaproic acid	for use in the treatment of excessive postoperative bleeding.	rs783147	360.2	progressive myopia	0.002508	0.509	0	9	0	NA	Likely	DKFZp779M0222	9071	A6PVI2:P00747:Q5TEH5	NP_000292.1:NP_001161810.1
Matrisome-associated	ECM Regulators	PLG	plasminogen	9071	aminocaproic acid	for use in the treatment of excessive postoperative bleeding.	rs783147	362.26	Macular puckering of retina	0.04058	1.158	0	2	0	NA	Likely	DKFZp779M0222	9071	A6PVI2:P00747:Q5TEH5	NP_000292.1:NP_001161810.1
Matrisome-associated	ECM Regulators	PLG	plasminogen	9071	aminocaproic acid	for use in the treatment of excessive postoperative bleeding.	rs783147	366.1	Nonsenile Cataract	0.01302	0.744	0	0	0	NA	Novel	DKFZp779M0222	9071	A6PVI2:P00747:Q5TEH5	NP_000292.1:NP_001161810.1
Matrisome-associated	ECM Regulators	PLG	plasminogen	9071	aminocaproic acid	for use in the treatment of excessive postoperative bleeding.	rs783147	367	Disorders of refraction and accommodation	0.04751	0.9309	0	0	0	NA	Novel	DKFZp779M0222	9071	A6PVI2:P00747:Q5TEH5	NP_000292.1:NP_001161810.1
Matrisome-associated	ECM Regulators	PLG	plasminogen	9071	aminocaproic acid	for use in the treatment of excessive postoperative bleeding.	rs783147	367.9	Blindness and low vision	0.01465	0.7842	0	147	0	NA	Likely	DKFZp779M0222	9071	A6PVI2:P00747:Q5TEH5	NP_000292.1:NP_001161810.1
Matrisome-associated	ECM Regulators	PLG	plasminogen	9071	aminocaproic acid	for use in the treatment of excessive postoperative bleeding.	rs783147	385	Other disorders of middle ear and mastoid	0.03163	0.7359	0	0	0	NA	Novel	DKFZp779M0222	9071	A6PVI2:P00747:Q5TEH5	NP_000292.1:NP_001161810.1
Matrisome-associated	ECM Regulators	PLG	plasminogen	9071	aminocaproic acid	for use in the treatment of excessive postoperative bleeding.	rs783147	411.41	Aneurysm and dissection of heart	0.03332	1.71	0	61	0	NA	Likely	DKFZp779M0222	9071	A6PVI2:P00747:Q5TEH5	NP_000292.1:NP_001161810.1
Matrisome-associated	ECM Regulators	PLG	plasminogen	9071	aminocaproic acid	for use in the treatment of excessive postoperative bleeding.	rs783147	416	Cardiomegaly	0.02991	0.8912	0	0	0	NA	Novel	DKFZp779M0222	9071	A6PVI2:P00747:Q5TEH5	NP_000292.1:NP_001161810.1
Matrisome-associated	ECM Regulators	PLG	plasminogen	9071	aminocaproic acid	for use in the treatment of excessive postoperative bleeding.	rs783147	427.7	Tachycardia NOS	0.04458	0.878	0	2	0	NA	Likely	DKFZp779M0222	9071	A6PVI2:P00747:Q5TEH5	NP_000292.1:NP_001161810.1
Matrisome-associated	ECM Regulators	PLG	plasminogen	9071	aminocaproic acid	for use in the treatment of excessive postoperative bleeding.	rs783147	428.2	Heart failure NOS	0.02398	0.8083	0	5	0	NA	Likely	DKFZp779M0222	9071	A6PVI2:P00747:Q5TEH5	NP_000292.1:NP_001161810.1
Matrisome-associated	ECM Regulators	PLG	plasminogen	9071	aminocaproic acid	for use in the treatment of excessive postoperative bleeding.	rs783147	429	Ill-defined descriptions and complications of heart disease	0.04698	0.9242	0	11	0	NA	Likely	DKFZp779M0222	9071	A6PVI2:P00747:Q5TEH5	NP_000292.1:NP_001161810.1
Matrisome-associated	ECM Regulators	PLG	plasminogen	9071	aminocaproic acid	for use in the treatment of excessive postoperative bleeding.	rs783147	429.3	Symptoms involving cardiovascular system	0.01501	0.8744	0	1	0	NA	Likely	DKFZp779M0222	9071	A6PVI2:P00747:Q5TEH5	NP_000292.1:NP_001161810.1
Matrisome-associated	ECM Regulators	PLG	plasminogen	9071	aminocaproic acid	for use in the treatment of excessive postoperative bleeding.	rs783147	433.1	Occlusion and stenosis of precerebral arteries	0.0227	0.8983	0	2	1	NA	Strongly supported	DKFZp779M0222	9071	A6PVI2:P00747:Q5TEH5	NP_000292.1:NP_001161810.1
Matrisome-associated	ECM Regulators	PLG	plasminogen	9071	aminocaproic acid	for use in the treatment of excessive postoperative bleeding.	rs783147	443.9	Peripheral arterial disease	0.0395	0.9137	0	0	0	NA	Novel	DKFZp779M0222	9071	A6PVI2:P00747:Q5TEH5	NP_000292.1:NP_001161810.1
Matrisome-associated	ECM Regulators	PLG	plasminogen	9071	aminocaproic acid	for use in the treatment of excessive postoperative bleeding.	rs783147	473.1	Chronic laryngitis	0.02936	1.692	0	0	0	NA	Novel	DKFZp779M0222	9071	A6PVI2:P00747:Q5TEH5	NP_000292.1:NP_001161810.1
Matrisome-associated	ECM Regulators	PLG	plasminogen	9071	aminocaproic acid	for use in the treatment of excessive postoperative bleeding.	rs783147	497	Bronchitis	0.03885	0.9051	0	0	0	NA	Novel	DKFZp779M0222	9071	A6PVI2:P00747:Q5TEH5	NP_000292.1:NP_001161810.1
Matrisome-associated	ECM Regulators	PLG	plasminogen	9071	aminocaproic acid	for use in the treatment of excessive postoperative bleeding.	rs783147	510.1	Lung involvement in conditions classified elsewhere	0.03946	1.716	0	0	0	NA	Novel	DKFZp779M0222	9071	A6PVI2:P00747:Q5TEH5	NP_000292.1:NP_001161810.1
Matrisome-associated	ECM Regulators	PLG	plasminogen	9071	aminocaproic acid	for use in the treatment of excessive postoperative bleeding.	rs783147	516	Abnormal sputum	0.04862	1.221	0	0	0	NA	Novel	DKFZp779M0222	9071	A6PVI2:P00747:Q5TEH5	NP_000292.1:NP_001161810.1
Matrisome-associated	ECM Regulators	PLG	plasminogen	9071	aminocaproic acid	for use in the treatment of excessive postoperative bleeding.	rs783147	530	Diseases of esophagus	0.02616	1.069	0	2	0	NA	Likely	DKFZp779M0222	9071	A6PVI2:P00747:Q5TEH5	NP_000292.1:NP_001161810.1
Matrisome-associated	ECM Regulators	PLG	plasminogen	9071	aminocaproic acid	for use in the treatment of excessive postoperative bleeding.	rs783147	530.11	GERD	0.0356	1.07	0	0	0	NA	Novel	DKFZp779M0222	9071	A6PVI2:P00747:Q5TEH5	NP_000292.1:NP_001161810.1
Matrisome-associated	ECM Regulators	PLG	plasminogen	9071	aminocaproic acid	for use in the treatment of excessive postoperative bleeding.	rs783147	535	Gastritis and duodenitis	0.006081	1.144	0	4	0	NA	Likely	DKFZp779M0222	9071	A6PVI2:P00747:Q5TEH5	NP_000292.1:NP_001161810.1
Matrisome-associated	ECM Regulators	PLG	plasminogen	9071	aminocaproic acid	for use in the treatment of excessive postoperative bleeding.	rs783147	535.8	Other specified gastritis	0.04039	1.195	0	4	0	NA	Likely	DKFZp779M0222	9071	A6PVI2:P00747:Q5TEH5	NP_000292.1:NP_001161810.1
Matrisome-associated	ECM Regulators	PLG	plasminogen	9071	aminocaproic acid	for use in the treatment of excessive postoperative bleeding.	rs783147	550	Abdominal hernia	0.02804	1.077	0	12	0	NA	Likely	DKFZp779M0222	9071	A6PVI2:P00747:Q5TEH5	NP_000292.1:NP_001161810.1
Matrisome-associated	ECM Regulators	PLG	plasminogen	9071	aminocaproic acid	for use in the treatment of excessive postoperative bleeding.	rs783147	550.4	Umbilical hernia	0.001594	1.322	0	12	0	NA	Likely	DKFZp779M0222	9071	A6PVI2:P00747:Q5TEH5	NP_000292.1:NP_001161810.1
Matrisome-associated	ECM Regulators	PLG	plasminogen	9071	aminocaproic acid	for use in the treatment of excessive postoperative bleeding.	rs783147	550.6	Incisional hernia	0.003328	1.326	0	0	0	NA	Novel	DKFZp779M0222	9071	A6PVI2:P00747:Q5TEH5	NP_000292.1:NP_001161810.1
Matrisome-associated	ECM Regulators	PLG	plasminogen	9071	aminocaproic acid	for use in the treatment of excessive postoperative bleeding.	rs783147	557	Intestinal malabsorption	0.01877	1.313	0	0	0	NA	Novel	DKFZp779M0222	9071	A6PVI2:P00747:Q5TEH5	NP_000292.1:NP_001161810.1
Matrisome-associated	ECM Regulators	PLG	plasminogen	9071	aminocaproic acid	for use in the treatment of excessive postoperative bleeding.	rs783147	557.1	Celiac or tropical sprue	0.01914	1.63	0	0	0	NA	Novel	DKFZp779M0222	9071	A6PVI2:P00747:Q5TEH5	NP_000292.1:NP_001161810.1
Matrisome-associated	ECM Regulators	PLG	plasminogen	9071	aminocaproic acid	for use in the treatment of excessive postoperative bleeding.	rs783147	557.11	Celiac disease	0.0322	1.577	0	0	0	NA	Novel	DKFZp779M0222	9071	A6PVI2:P00747:Q5TEH5	NP_000292.1:NP_001161810.1
Matrisome-associated	ECM Regulators	PLG	plasminogen	9071	aminocaproic acid	for use in the treatment of excessive postoperative bleeding.	rs783147	557.9	Intestinal malabsorption NOS	0.02064	1.548	0	0	0	NA	Novel	DKFZp779M0222	9071	A6PVI2:P00747:Q5TEH5	NP_000292.1:NP_001161810.1
Matrisome-associated	ECM Regulators	PLG	plasminogen	9071	aminocaproic acid	for use in the treatment of excessive postoperative bleeding.	rs783147	561	Symptoms involving digestive system	0.02343	1.181	0	0	0	NA	Novel	DKFZp779M0222	9071	A6PVI2:P00747:Q5TEH5	NP_000292.1:NP_001161810.1
Matrisome-associated	ECM Regulators	PLG	plasminogen	9071	aminocaproic acid	for use in the treatment of excessive postoperative bleeding.	rs783147	585.2	Renal failure NOS	0.03035	0.7946	0	35	0	NA	Likely	DKFZp779M0222	9071	A6PVI2:P00747:Q5TEH5	NP_000292.1:NP_001161810.1
Matrisome-associated	ECM Regulators	PLG	plasminogen	9071	aminocaproic acid	for use in the treatment of excessive postoperative bleeding.	rs783147	586.4	Stricture/obstruction of ureter	0.0141	0.6961	0	0	0	NA	Novel	DKFZp779M0222	9071	A6PVI2:P00747:Q5TEH5	NP_000292.1:NP_001161810.1
Matrisome-associated	ECM Regulators	PLG	plasminogen	9071	aminocaproic acid	for use in the treatment of excessive postoperative bleeding.	rs783147	595	Hydronephrosis	0.03584	0.79990000000000006	0	0	0	NA	Novel	DKFZp779M0222	9071	A6PVI2:P00747:Q5TEH5	NP_000292.1:NP_001161810.1
Matrisome-associated	ECM Regulators	PLG	plasminogen	9071	aminocaproic acid	for use in the treatment of excessive postoperative bleeding.	rs783147	596.5	Functional disorders of bladder	0.02041	1.253	0	15	0	NA	Likely	DKFZp779M0222	9071	A6PVI2:P00747:Q5TEH5	NP_000292.1:NP_001161810.1
Matrisome-associated	ECM Regulators	PLG	plasminogen	9071	aminocaproic acid	for use in the treatment of excessive postoperative bleeding.	rs783147	598.4	Other cells and casts in urine	0.01652	0.7195	0	0	0	NA	Novel	DKFZp779M0222	9071	A6PVI2:P00747:Q5TEH5	NP_000292.1:NP_001161810.1
Matrisome-associated	ECM Regulators	PLG	plasminogen	9071	aminocaproic acid	for use in the treatment of excessive postoperative bleeding.	rs783147	614.53	Cyst or abscess of Bartholin's gland	0.04431	1.659	0	1	0	NA	Likely	DKFZp779M0222	9071	A6PVI2:P00747:Q5TEH5	NP_000292.1:NP_001161810.1
Matrisome-associated	ECM Regulators	PLG	plasminogen	9071	aminocaproic acid	for use in the treatment of excessive postoperative bleeding.	rs783147	619.4	Noninflammatory disorders of vagina	0.02176	0.7728	0	1	0	NA	Likely	DKFZp779M0222	9071	A6PVI2:P00747:Q5TEH5	NP_000292.1:NP_001161810.1
Matrisome-associated	ECM Regulators	PLG	plasminogen	9071	aminocaproic acid	for use in the treatment of excessive postoperative bleeding.	rs783147	686.3	Pilonidal cyst	0.009994	0.4506	0	0	0	NA	Novel	DKFZp779M0222	9071	A6PVI2:P00747:Q5TEH5	NP_000292.1:NP_001161810.1
Matrisome-associated	ECM Regulators	PLG	plasminogen	9071	aminocaproic acid	for use in the treatment of excessive postoperative bleeding.	rs783147	695.6	Prurigo	0.01933	0.8033	0	0	0	NA	Novel	DKFZp779M0222	9071	A6PVI2:P00747:Q5TEH5	NP_000292.1:NP_001161810.1
Matrisome-associated	ECM Regulators	PLG	plasminogen	9071	aminocaproic acid	for use in the treatment of excessive postoperative bleeding.	rs783147	696	Psoriasis & related disorders	0.02901	1.182	0	92	0	NA	Likely	DKFZp779M0222	9071	A6PVI2:P00747:Q5TEH5	NP_000292.1:NP_001161810.1
Matrisome-associated	ECM Regulators	PLG	plasminogen	9071	aminocaproic acid	for use in the treatment of excessive postoperative bleeding.	rs783147	709	Diffuse diseases of connective tissue	0.02748	1.21	0	0	0	NA	Novel	DKFZp779M0222	9071	A6PVI2:P00747:Q5TEH5	NP_000292.1:NP_001161810.1
Matrisome-associated	ECM Regulators	PLG	plasminogen	9071	aminocaproic acid	for use in the treatment of excessive postoperative bleeding.	rs783147	732	Osteochondropathies	0.02197	0.5637	0	0	0	NA	Novel	DKFZp779M0222	9071	A6PVI2:P00747:Q5TEH5	NP_000292.1:NP_001161810.1
Matrisome-associated	ECM Regulators	PLG	plasminogen	9071	aminocaproic acid	for use in the treatment of excessive postoperative bleeding.	rs783147	736.2	Acquired deformities of finger	0.03938	0.748	0	3	0	NA	Likely	DKFZp779M0222	9071	A6PVI2:P00747:Q5TEH5	NP_000292.1:NP_001161810.1
Matrisome-associated	ECM Regulators	PLG	plasminogen	9071	aminocaproic acid	for use in the treatment of excessive postoperative bleeding.	rs783147	736.6	Unequal leg length (acquired)	0.03822	1.338	0	0	0	NA	Novel	DKFZp779M0222	9071	A6PVI2:P00747:Q5TEH5	NP_000292.1:NP_001161810.1
Matrisome-associated	ECM Regulators	PLG	plasminogen	9071	aminocaproic acid	for use in the treatment of excessive postoperative bleeding.	rs783147	743.12	Behcet's syndrome	0.007743	0.6422	0	0	0	NA	Novel	DKFZp779M0222	9071	A6PVI2:P00747:Q5TEH5	NP_000292.1:NP_001161810.1
Matrisome-associated	ECM Regulators	PLG	plasminogen	9071	aminocaproic acid	for use in the treatment of excessive postoperative bleeding.	rs783147	801	Fracture of ankle and foot	0.029	0.8949	0	1	0	NA	Likely	DKFZp779M0222	9071	A6PVI2:P00747:Q5TEH5	NP_000292.1:NP_001161810.1
Matrisome-associated	ECM Regulators	PLG	plasminogen	9071	aminocaproic acid	for use in the treatment of excessive postoperative bleeding.	rs783147	855	Mechanical complication of nervous system device, implant, and graft	0.03239	1.716	0	4	0	NA	Likely	DKFZp779M0222	9071	A6PVI2:P00747:Q5TEH5	NP_000292.1:NP_001161810.1
Matrisome-associated	ECM Regulators	PLG	plasminogen	9071	aminocaproic acid	for use in the treatment of excessive postoperative bleeding.	rs783147	870.4	Open wound of nose and sinus	0.005933	2.074	0	4	0	NA	Likely	DKFZp779M0222	9071	A6PVI2:P00747:Q5TEH5	NP_000292.1:NP_001161810.1
Matrisome-associated	ECM Regulators	PLG	plasminogen	9071	aminocaproic acid	for use in the treatment of excessive postoperative bleeding.	rs783147	871.1	Open wound of hand except finger(s)	0.0363	0.8239	0	22	0	NA	Likely	DKFZp779M0222	9071	A6PVI2:P00747:Q5TEH5	NP_000292.1:NP_001161810.1
Matrisome-associated	ECM Regulators	PLG	plasminogen	9071	aminocaproic acid	for use in the treatment of excessive postoperative bleeding.	rs783147	941	Allergy to serum or vaccine	0.01722	1.633	0	4	0	NA	Likely	DKFZp779M0222	9071	A6PVI2:P00747:Q5TEH5	NP_000292.1:NP_001161810.1
Matrisome-associated	ECM Regulators	PLG	plasminogen	9071	anistreplase	for lysis of acute pulmonary emboli, intracoronary emboli and management of myocardial infarction	rs783147	10	Tuberculosis	0.02059	1.749	0	0	0	NA	Novel	DKFZp779M0222	9071	A6PVI2:P00747:Q5TEH5	NP_000292.1:NP_001161810.1
Matrisome-associated	ECM Regulators	PLG	plasminogen	9071	anistreplase	for lysis of acute pulmonary emboli, intracoronary emboli and management of myocardial infarction	rs783147	189.12	Malignant neoplasm of renal pelvis	0.02822	0.5091	0	0	0	NA	Novel	DKFZp779M0222	9071	A6PVI2:P00747:Q5TEH5	NP_000292.1:NP_001161810.1
Matrisome-associated	ECM Regulators	PLG	plasminogen	9071	anistreplase	for lysis of acute pulmonary emboli, intracoronary emboli and management of myocardial infarction	rs783147	218.2	Benign neoplasm of uterus	0.03749	1.387	0	0	0	NA	Novel	DKFZp779M0222	9071	A6PVI2:P00747:Q5TEH5	NP_000292.1:NP_001161810.1
Matrisome-associated	ECM Regulators	PLG	plasminogen	9071	anistreplase	for lysis of acute pulmonary emboli, intracoronary emboli and management of myocardial infarction	rs783147	227	Benign neoplasm of other endocrine glands	0.01906	0.7381	0	0	0	NA	Novel	DKFZp779M0222	9071	A6PVI2:P00747:Q5TEH5	NP_000292.1:NP_001161810.1
Matrisome-associated	ECM Regulators	PLG	plasminogen	9071	anistreplase	for lysis of acute pulmonary emboli, intracoronary emboli and management of myocardial infarction	rs783147	275.1	Iron metabolism disorder	0.02589	1.665	0	0	0	NA	Novel	DKFZp779M0222	9071	A6PVI2:P00747:Q5TEH5	NP_000292.1:NP_001161810.1
Matrisome-associated	ECM Regulators	PLG	plasminogen	9071	anistreplase	for lysis of acute pulmonary emboli, intracoronary emboli and management of myocardial infarction	rs783147	276.41	Acidosis	0.03125	0.7718	0	0	0	NA	Novel	DKFZp779M0222	9071	A6PVI2:P00747:Q5TEH5	NP_000292.1:NP_001161810.1
Matrisome-associated	ECM Regulators	PLG	plasminogen	9071	anistreplase	for lysis of acute pulmonary emboli, intracoronary emboli and management of myocardial infarction	rs783147	276.6	Fluid overload	0.04878	0.8375	0	0	0	NA	Novel	DKFZp779M0222	9071	A6PVI2:P00747:Q5TEH5	NP_000292.1:NP_001161810.1
Matrisome-associated	ECM Regulators	PLG	plasminogen	9071	anistreplase	for lysis of acute pulmonary emboli, intracoronary emboli and management of myocardial infarction	rs783147	278.3	Localized adiposity	0.03098	1.678	0	0	0	NA	Novel	DKFZp779M0222	9071	A6PVI2:P00747:Q5TEH5	NP_000292.1:NP_001161810.1
Matrisome-associated	ECM Regulators	PLG	plasminogen	9071	anistreplase	for lysis of acute pulmonary emboli, intracoronary emboli and management of myocardial infarction	rs783147	286.8	Hypercoagulable state	0.01646	1.435	0	0	0	NA	Novel	DKFZp779M0222	9071	A6PVI2:P00747:Q5TEH5	NP_000292.1:NP_001161810.1
Matrisome-associated	ECM Regulators	PLG	plasminogen	9071	anistreplase	for lysis of acute pulmonary emboli, intracoronary emboli and management of myocardial infarction	rs783147	290.12	Dementia with cerebral degenerations	0.03115	1.415	0	0	0	NA	Novel	DKFZp779M0222	9071	A6PVI2:P00747:Q5TEH5	NP_000292.1:NP_001161810.1
Matrisome-associated	ECM Regulators	PLG	plasminogen	9071	anistreplase	for lysis of acute pulmonary emboli, intracoronary emboli and management of myocardial infarction	rs783147	300.11	Generalized anxiety disorder	0.007966	0.7736	0	0	0	NA	Novel	DKFZp779M0222	9071	A6PVI2:P00747:Q5TEH5	NP_000292.1:NP_001161810.1
Matrisome-associated	ECM Regulators	PLG	plasminogen	9071	anistreplase	for lysis of acute pulmonary emboli, intracoronary emboli and management of myocardial infarction	rs783147	303.31	Gastrointestinal malfunction arising from mental factors	0.02949	1.769	0	0	0	NA	Novel	DKFZp779M0222	9071	A6PVI2:P00747:Q5TEH5	NP_000292.1:NP_001161810.1
Matrisome-associated	ECM Regulators	PLG	plasminogen	9071	anistreplase	for lysis of acute pulmonary emboli, intracoronary emboli and management of myocardial infarction	rs783147	312	Conduct disorders	0.03156	1.424	0	0	0	NA	Novel	DKFZp779M0222	9071	A6PVI2:P00747:Q5TEH5	NP_000292.1:NP_001161810.1
Matrisome-associated	ECM Regulators	PLG	plasminogen	9071	anistreplase	for lysis of acute pulmonary emboli, intracoronary emboli and management of myocardial infarction	rs783147	327.31	Central/nonobstroctive sleep apnea	0.04476	1.45	0	0	0	NA	Novel	DKFZp779M0222	9071	A6PVI2:P00747:Q5TEH5	NP_000292.1:NP_001161810.1
Matrisome-associated	ECM Regulators	PLG	plasminogen	9071	anistreplase	for lysis of acute pulmonary emboli, intracoronary emboli and management of myocardial infarction	rs783147	327.4	Insomnia	0.03776	0.8895	0	0	0	NA	Novel	DKFZp779M0222	9071	A6PVI2:P00747:Q5TEH5	NP_000292.1:NP_001161810.1
Matrisome-associated	ECM Regulators	PLG	plasminogen	9071	anistreplase	for lysis of acute pulmonary emboli, intracoronary emboli and management of myocardial infarction	rs783147	339	Other headache syndromes	0.008379	1.099	0	0	0	NA	Novel	DKFZp779M0222	9071	A6PVI2:P00747:Q5TEH5	NP_000292.1:NP_001161810.1
Matrisome-associated	ECM Regulators	PLG	plasminogen	9071	anistreplase	for lysis of acute pulmonary emboli, intracoronary emboli and management of myocardial infarction	rs783147	350.5	Abnormal reflex	0.01302	2.06	0	2	0	NA	Likely	DKFZp779M0222	9071	A6PVI2:P00747:Q5TEH5	NP_000292.1:NP_001161810.1
Matrisome-associated	ECM Regulators	PLG	plasminogen	9071	anistreplase	for lysis of acute pulmonary emboli, intracoronary emboli and management of myocardial infarction	rs783147	360	Disorders of the globe	0.02866	0.7331	0	0	0	NA	Novel	DKFZp779M0222	9071	A6PVI2:P00747:Q5TEH5	NP_000292.1:NP_001161810.1
Matrisome-associated	ECM Regulators	PLG	plasminogen	9071	anistreplase	for lysis of acute pulmonary emboli, intracoronary emboli and management of myocardial infarction	rs783147	360.2	progressive myopia	0.002508	0.509	0	2	0	NA	Likely	DKFZp779M0222	9071	A6PVI2:P00747:Q5TEH5	NP_000292.1:NP_001161810.1
Matrisome-associated	ECM Regulators	PLG	plasminogen	9071	anistreplase	for lysis of acute pulmonary emboli, intracoronary emboli and management of myocardial infarction	rs783147	362.26	Macular puckering of retina	0.04058	1.158	0	0	0	NA	Novel	DKFZp779M0222	9071	A6PVI2:P00747:Q5TEH5	NP_000292.1:NP_001161810.1
Matrisome-associated	ECM Regulators	PLG	plasminogen	9071	anistreplase	for lysis of acute pulmonary emboli, intracoronary emboli and management of myocardial infarction	rs783147	366.1	Nonsenile Cataract	0.01302	0.744	0	0	0	NA	Novel	DKFZp779M0222	9071	A6PVI2:P00747:Q5TEH5	NP_000292.1:NP_001161810.1
Matrisome-associated	ECM Regulators	PLG	plasminogen	9071	anistreplase	for lysis of acute pulmonary emboli, intracoronary emboli and management of myocardial infarction	rs783147	367	Disorders of refraction and accommodation	0.04751	0.9309	0	0	0	NA	Novel	DKFZp779M0222	9071	A6PVI2:P00747:Q5TEH5	NP_000292.1:NP_001161810.1
Matrisome-associated	ECM Regulators	PLG	plasminogen	9071	anistreplase	for lysis of acute pulmonary emboli, intracoronary emboli and management of myocardial infarction	rs783147	367.9	Blindness and low vision	0.01465	0.7842	0	21	0	NA	Likely	DKFZp779M0222	9071	A6PVI2:P00747:Q5TEH5	NP_000292.1:NP_001161810.1
Matrisome-associated	ECM Regulators	PLG	plasminogen	9071	anistreplase	for lysis of acute pulmonary emboli, intracoronary emboli and management of myocardial infarction	rs783147	385	Other disorders of middle ear and mastoid	0.03163	0.7359	0	0	0	NA	Novel	DKFZp779M0222	9071	A6PVI2:P00747:Q5TEH5	NP_000292.1:NP_001161810.1
Matrisome-associated	ECM Regulators	PLG	plasminogen	9071	anistreplase	for lysis of acute pulmonary emboli, intracoronary emboli and management of myocardial infarction	rs783147	411.41	Aneurysm and dissection of heart	0.03332	1.71	0	9	0	NA	Likely	DKFZp779M0222	9071	A6PVI2:P00747:Q5TEH5	NP_000292.1:NP_001161810.1
Matrisome-associated	ECM Regulators	PLG	plasminogen	9071	anistreplase	for lysis of acute pulmonary emboli, intracoronary emboli and management of myocardial infarction	rs783147	416	Cardiomegaly	0.02991	0.8912	0	0	0	NA	Novel	DKFZp779M0222	9071	A6PVI2:P00747:Q5TEH5	NP_000292.1:NP_001161810.1
Matrisome-associated	ECM Regulators	PLG	plasminogen	9071	anistreplase	for lysis of acute pulmonary emboli, intracoronary emboli and management of myocardial infarction	rs783147	427.7	Tachycardia NOS	0.04458	0.878	0	2	0	NA	Likely	DKFZp779M0222	9071	A6PVI2:P00747:Q5TEH5	NP_000292.1:NP_001161810.1
Matrisome-associated	ECM Regulators	PLG	plasminogen	9071	anistreplase	for lysis of acute pulmonary emboli, intracoronary emboli and management of myocardial infarction	rs783147	428.2	Heart failure NOS	0.02398	0.8083	0	3	0	NA	Likely	DKFZp779M0222	9071	A6PVI2:P00747:Q5TEH5	NP_000292.1:NP_001161810.1
Matrisome-associated	ECM Regulators	PLG	plasminogen	9071	anistreplase	for lysis of acute pulmonary emboli, intracoronary emboli and management of myocardial infarction	rs783147	429	Ill-defined descriptions and complications of heart disease	0.04698	0.9242	0	2	0	NA	Likely	DKFZp779M0222	9071	A6PVI2:P00747:Q5TEH5	NP_000292.1:NP_001161810.1
Matrisome-associated	ECM Regulators	PLG	plasminogen	9071	anistreplase	for lysis of acute pulmonary emboli, intracoronary emboli and management of myocardial infarction	rs783147	429.3	Symptoms involving cardiovascular system	0.01501	0.8744	0	0	0	NA	Novel	DKFZp779M0222	9071	A6PVI2:P00747:Q5TEH5	NP_000292.1:NP_001161810.1
Matrisome-associated	ECM Regulators	PLG	plasminogen	9071	anistreplase	for lysis of acute pulmonary emboli, intracoronary emboli and management of myocardial infarction	rs783147	433.1	Occlusion and stenosis of precerebral arteries	0.0227	0.8983	0	10	0	NA	Likely	DKFZp779M0222	9071	A6PVI2:P00747:Q5TEH5	NP_000292.1:NP_001161810.1
Matrisome-associated	ECM Regulators	PLG	plasminogen	9071	anistreplase	for lysis of acute pulmonary emboli, intracoronary emboli and management of myocardial infarction	rs783147	443.9	Peripheral arterial disease	0.0395	0.9137	0	0	0	NA	Novel	DKFZp779M0222	9071	A6PVI2:P00747:Q5TEH5	NP_000292.1:NP_001161810.1
Matrisome-associated	ECM Regulators	PLG	plasminogen	9071	anistreplase	for lysis of acute pulmonary emboli, intracoronary emboli and management of myocardial infarction	rs783147	473.1	Chronic laryngitis	0.02936	1.692	0	0	0	NA	Novel	DKFZp779M0222	9071	A6PVI2:P00747:Q5TEH5	NP_000292.1:NP_001161810.1
Matrisome-associated	ECM Regulators	PLG	plasminogen	9071	anistreplase	for lysis of acute pulmonary emboli, intracoronary emboli and management of myocardial infarction	rs783147	497	Bronchitis	0.03885	0.9051	0	0	0	NA	Novel	DKFZp779M0222	9071	A6PVI2:P00747:Q5TEH5	NP_000292.1:NP_001161810.1
Matrisome-associated	ECM Regulators	PLG	plasminogen	9071	anistreplase	for lysis of acute pulmonary emboli, intracoronary emboli and management of myocardial infarction	rs783147	510.1	Lung involvement in conditions classified elsewhere	0.03946	1.716	0	0	0	NA	Novel	DKFZp779M0222	9071	A6PVI2:P00747:Q5TEH5	NP_000292.1:NP_001161810.1
Matrisome-associated	ECM Regulators	PLG	plasminogen	9071	anistreplase	for lysis of acute pulmonary emboli, intracoronary emboli and management of myocardial infarction	rs783147	516	Abnormal sputum	0.04862	1.221	0	0	0	NA	Novel	DKFZp779M0222	9071	A6PVI2:P00747:Q5TEH5	NP_000292.1:NP_001161810.1
Matrisome-associated	ECM Regulators	PLG	plasminogen	9071	anistreplase	for lysis of acute pulmonary emboli, intracoronary emboli and management of myocardial infarction	rs783147	530	Diseases of esophagus	0.02616	1.069	0	0	0	NA	Novel	DKFZp779M0222	9071	A6PVI2:P00747:Q5TEH5	NP_000292.1:NP_001161810.1
Matrisome-associated	ECM Regulators	PLG	plasminogen	9071	anistreplase	for lysis of acute pulmonary emboli, intracoronary emboli and management of myocardial infarction	rs783147	530.11	GERD	0.0356	1.07	0	0	0	NA	Novel	DKFZp779M0222	9071	A6PVI2:P00747:Q5TEH5	NP_000292.1:NP_001161810.1
Matrisome-associated	ECM Regulators	PLG	plasminogen	9071	anistreplase	for lysis of acute pulmonary emboli, intracoronary emboli and management of myocardial infarction	rs783147	535	Gastritis and duodenitis	0.006081	1.144	0	0	0	NA	Novel	DKFZp779M0222	9071	A6PVI2:P00747:Q5TEH5	NP_000292.1:NP_001161810.1
Matrisome-associated	ECM Regulators	PLG	plasminogen	9071	anistreplase	for lysis of acute pulmonary emboli, intracoronary emboli and management of myocardial infarction	rs783147	535.8	Other specified gastritis	0.04039	1.195	0	0	0	NA	Novel	DKFZp779M0222	9071	A6PVI2:P00747:Q5TEH5	NP_000292.1:NP_001161810.1
Matrisome-associated	ECM Regulators	PLG	plasminogen	9071	anistreplase	for lysis of acute pulmonary emboli, intracoronary emboli and management of myocardial infarction	rs783147	550	Abdominal hernia	0.02804	1.077	0	1	0	NA	Likely	DKFZp779M0222	9071	A6PVI2:P00747:Q5TEH5	NP_000292.1:NP_001161810.1
Matrisome-associated	ECM Regulators	PLG	plasminogen	9071	anistreplase	for lysis of acute pulmonary emboli, intracoronary emboli and management of myocardial infarction	rs783147	550.4	Umbilical hernia	0.001594	1.322	0	0	0	NA	Novel	DKFZp779M0222	9071	A6PVI2:P00747:Q5TEH5	NP_000292.1:NP_001161810.1
Matrisome-associated	ECM Regulators	PLG	plasminogen	9071	anistreplase	for lysis of acute pulmonary emboli, intracoronary emboli and management of myocardial infarction	rs783147	550.6	Incisional hernia	0.003328	1.326	0	0	0	NA	Novel	DKFZp779M0222	9071	A6PVI2:P00747:Q5TEH5	NP_000292.1:NP_001161810.1
Matrisome-associated	ECM Regulators	PLG	plasminogen	9071	anistreplase	for lysis of acute pulmonary emboli, intracoronary emboli and management of myocardial infarction	rs783147	557	Intestinal malabsorption	0.01877	1.313	0	0	0	NA	Novel	DKFZp779M0222	9071	A6PVI2:P00747:Q5TEH5	NP_000292.1:NP_001161810.1
Matrisome-associated	ECM Regulators	PLG	plasminogen	9071	anistreplase	for lysis of acute pulmonary emboli, intracoronary emboli and management of myocardial infarction	rs783147	557.1	Celiac or tropical sprue	0.01914	1.63	0	0	0	NA	Novel	DKFZp779M0222	9071	A6PVI2:P00747:Q5TEH5	NP_000292.1:NP_001161810.1
Matrisome-associated	ECM Regulators	PLG	plasminogen	9071	anistreplase	for lysis of acute pulmonary emboli, intracoronary emboli and management of myocardial infarction	rs783147	557.11	Celiac disease	0.0322	1.577	0	0	0	NA	Novel	DKFZp779M0222	9071	A6PVI2:P00747:Q5TEH5	NP_000292.1:NP_001161810.1
Matrisome-associated	ECM Regulators	PLG	plasminogen	9071	anistreplase	for lysis of acute pulmonary emboli, intracoronary emboli and management of myocardial infarction	rs783147	557.9	Intestinal malabsorption NOS	0.02064	1.548	0	0	0	NA	Novel	DKFZp779M0222	9071	A6PVI2:P00747:Q5TEH5	NP_000292.1:NP_001161810.1
Matrisome-associated	ECM Regulators	PLG	plasminogen	9071	anistreplase	for lysis of acute pulmonary emboli, intracoronary emboli and management of myocardial infarction	rs783147	561	Symptoms involving digestive system	0.02343	1.181	0	0	0	NA	Novel	DKFZp779M0222	9071	A6PVI2:P00747:Q5TEH5	NP_000292.1:NP_001161810.1
Matrisome-associated	ECM Regulators	PLG	plasminogen	9071	anistreplase	for lysis of acute pulmonary emboli, intracoronary emboli and management of myocardial infarction	rs783147	585.2	Renal failure NOS	0.03035	0.7946	0	0	0	NA	Novel	DKFZp779M0222	9071	A6PVI2:P00747:Q5TEH5	NP_000292.1:NP_001161810.1
Matrisome-associated	ECM Regulators	PLG	plasminogen	9071	anistreplase	for lysis of acute pulmonary emboli, intracoronary emboli and management of myocardial infarction	rs783147	586.4	Stricture/obstruction of ureter	0.0141	0.6961	0	0	0	NA	Novel	DKFZp779M0222	9071	A6PVI2:P00747:Q5TEH5	NP_000292.1:NP_001161810.1
Matrisome-associated	ECM Regulators	PLG	plasminogen	9071	anistreplase	for lysis of acute pulmonary emboli, intracoronary emboli and management of myocardial infarction	rs783147	595	Hydronephrosis	0.03584	0.79990000000000006	0	0	0	NA	Novel	DKFZp779M0222	9071	A6PVI2:P00747:Q5TEH5	NP_000292.1:NP_001161810.1
Matrisome-associated	ECM Regulators	PLG	plasminogen	9071	anistreplase	for lysis of acute pulmonary emboli, intracoronary emboli and management of myocardial infarction	rs783147	596.5	Functional disorders of bladder	0.02041	1.253	0	0	0	NA	Novel	DKFZp779M0222	9071	A6PVI2:P00747:Q5TEH5	NP_000292.1:NP_001161810.1
Matrisome-associated	ECM Regulators	PLG	plasminogen	9071	anistreplase	for lysis of acute pulmonary emboli, intracoronary emboli and management of myocardial infarction	rs783147	598.4	Other cells and casts in urine	0.01652	0.7195	0	0	0	NA	Novel	DKFZp779M0222	9071	A6PVI2:P00747:Q5TEH5	NP_000292.1:NP_001161810.1
Matrisome-associated	ECM Regulators	PLG	plasminogen	9071	anistreplase	for lysis of acute pulmonary emboli, intracoronary emboli and management of myocardial infarction	rs783147	614.53	Cyst or abscess of Bartholin's gland	0.04431	1.659	0	0	0	NA	Novel	DKFZp779M0222	9071	A6PVI2:P00747:Q5TEH5	NP_000292.1:NP_001161810.1
Matrisome-associated	ECM Regulators	PLG	plasminogen	9071	anistreplase	for lysis of acute pulmonary emboli, intracoronary emboli and management of myocardial infarction	rs783147	619.4	Noninflammatory disorders of vagina	0.02176	0.7728	0	0	0	NA	Novel	DKFZp779M0222	9071	A6PVI2:P00747:Q5TEH5	NP_000292.1:NP_001161810.1
Matrisome-associated	ECM Regulators	PLG	plasminogen	9071	anistreplase	for lysis of acute pulmonary emboli, intracoronary emboli and management of myocardial infarction	rs783147	686.3	Pilonidal cyst	0.009994	0.4506	0	0	0	NA	Novel	DKFZp779M0222	9071	A6PVI2:P00747:Q5TEH5	NP_000292.1:NP_001161810.1
Matrisome-associated	ECM Regulators	PLG	plasminogen	9071	anistreplase	for lysis of acute pulmonary emboli, intracoronary emboli and management of myocardial infarction	rs783147	695.6	Prurigo	0.01933	0.8033	0	0	0	NA	Novel	DKFZp779M0222	9071	A6PVI2:P00747:Q5TEH5	NP_000292.1:NP_001161810.1
Matrisome-associated	ECM Regulators	PLG	plasminogen	9071	anistreplase	for lysis of acute pulmonary emboli, intracoronary emboli and management of myocardial infarction	rs783147	696	Psoriasis & related disorders	0.02901	1.182	0	31	0	NA	Likely	DKFZp779M0222	9071	A6PVI2:P00747:Q5TEH5	NP_000292.1:NP_001161810.1
Matrisome-associated	ECM Regulators	PLG	plasminogen	9071	anistreplase	for lysis of acute pulmonary emboli, intracoronary emboli and management of myocardial infarction	rs783147	709	Diffuse diseases of connective tissue	0.02748	1.21	0	0	0	NA	Novel	DKFZp779M0222	9071	A6PVI2:P00747:Q5TEH5	NP_000292.1:NP_001161810.1
Matrisome-associated	ECM Regulators	PLG	plasminogen	9071	anistreplase	for lysis of acute pulmonary emboli, intracoronary emboli and management of myocardial infarction	rs783147	732	Osteochondropathies	0.02197	0.5637	0	0	0	NA	Novel	DKFZp779M0222	9071	A6PVI2:P00747:Q5TEH5	NP_000292.1:NP_001161810.1
Matrisome-associated	ECM Regulators	PLG	plasminogen	9071	anistreplase	for lysis of acute pulmonary emboli, intracoronary emboli and management of myocardial infarction	rs783147	736.2	Acquired deformities of finger	0.03938	0.748	0	0	0	NA	Novel	DKFZp779M0222	9071	A6PVI2:P00747:Q5TEH5	NP_000292.1:NP_001161810.1
Matrisome-associated	ECM Regulators	PLG	plasminogen	9071	anistreplase	for lysis of acute pulmonary emboli, intracoronary emboli and management of myocardial infarction	rs783147	736.6	Unequal leg length (acquired)	0.03822	1.338	0	0	0	NA	Novel	DKFZp779M0222	9071	A6PVI2:P00747:Q5TEH5	NP_000292.1:NP_001161810.1
Matrisome-associated	ECM Regulators	PLG	plasminogen	9071	anistreplase	for lysis of acute pulmonary emboli, intracoronary emboli and management of myocardial infarction	rs783147	743.12	Behcet's syndrome	0.007743	0.6422	0	0	0	NA	Novel	DKFZp779M0222	9071	A6PVI2:P00747:Q5TEH5	NP_000292.1:NP_001161810.1
Matrisome-associated	ECM Regulators	PLG	plasminogen	9071	anistreplase	for lysis of acute pulmonary emboli, intracoronary emboli and management of myocardial infarction	rs783147	801	Fracture of ankle and foot	0.029	0.8949	0	0	0	NA	Novel	DKFZp779M0222	9071	A6PVI2:P00747:Q5TEH5	NP_000292.1:NP_001161810.1
Matrisome-associated	ECM Regulators	PLG	plasminogen	9071	anistreplase	for lysis of acute pulmonary emboli, intracoronary emboli and management of myocardial infarction	rs783147	855	Mechanical complication of nervous system device, implant, and graft	0.03239	1.716	0	0	0	NA	Novel	DKFZp779M0222	9071	A6PVI2:P00747:Q5TEH5	NP_000292.1:NP_001161810.1
Matrisome-associated	ECM Regulators	PLG	plasminogen	9071	anistreplase	for lysis of acute pulmonary emboli, intracoronary emboli and management of myocardial infarction	rs783147	870.4	Open wound of nose and sinus	0.005933	2.074	0	0	0	NA	Novel	DKFZp779M0222	9071	A6PVI2:P00747:Q5TEH5	NP_000292.1:NP_001161810.1
Matrisome-associated	ECM Regulators	PLG	plasminogen	9071	anistreplase	for lysis of acute pulmonary emboli, intracoronary emboli and management of myocardial infarction	rs783147	871.1	Open wound of hand except finger(s)	0.0363	0.8239	0	1	0	NA	Likely	DKFZp779M0222	9071	A6PVI2:P00747:Q5TEH5	NP_000292.1:NP_001161810.1
Matrisome-associated	ECM Regulators	PLG	plasminogen	9071	anistreplase	for lysis of acute pulmonary emboli, intracoronary emboli and management of myocardial infarction	rs783147	941	Allergy to serum or vaccine	0.01722	1.633	0	2	0	NA	Likely	DKFZp779M0222	9071	A6PVI2:P00747:Q5TEH5	NP_000292.1:NP_001161810.1
Matrisome-associated	ECM Regulators	PLG	plasminogen	9071	aprotinin	for prophylactic use to reduce perioperative blood loss and the need for blood transfusion in patients undergoing cardiopulmonary bypass in the course of coronary artery bypass graft surgery who are at an increased risk for blood loss and blood transfusion.	rs783147	10	Tuberculosis	0.02059	1.749	0	0	0	NA	Novel	DKFZp779M0222	9071	A6PVI2:P00747:Q5TEH5	NP_000292.1:NP_001161810.1
Matrisome-associated	ECM Regulators	PLG	plasminogen	9071	aprotinin	for prophylactic use to reduce perioperative blood loss and the need for blood transfusion in patients undergoing cardiopulmonary bypass in the course of coronary artery bypass graft surgery who are at an increased risk for blood loss and blood transfusion.	rs783147	189.12	Malignant neoplasm of renal pelvis	0.02822	0.5091	0	0	0	NA	Novel	DKFZp779M0222	9071	A6PVI2:P00747:Q5TEH5	NP_000292.1:NP_001161810.1
Matrisome-associated	ECM Regulators	PLG	plasminogen	9071	aprotinin	for prophylactic use to reduce perioperative blood loss and the need for blood transfusion in patients undergoing cardiopulmonary bypass in the course of coronary artery bypass graft surgery who are at an increased risk for blood loss and blood transfusion.	rs783147	218.2	Benign neoplasm of uterus	0.03749	1.387	0	23	0	NA	Likely	DKFZp779M0222	9071	A6PVI2:P00747:Q5TEH5	NP_000292.1:NP_001161810.1
Matrisome-associated	ECM Regulators	PLG	plasminogen	9071	aprotinin	for prophylactic use to reduce perioperative blood loss and the need for blood transfusion in patients undergoing cardiopulmonary bypass in the course of coronary artery bypass graft surgery who are at an increased risk for blood loss and blood transfusion.	rs783147	227	Benign neoplasm of other endocrine glands	0.01906	0.7381	0	0	0	NA	Novel	DKFZp779M0222	9071	A6PVI2:P00747:Q5TEH5	NP_000292.1:NP_001161810.1
Matrisome-associated	ECM Regulators	PLG	plasminogen	9071	aprotinin	for prophylactic use to reduce perioperative blood loss and the need for blood transfusion in patients undergoing cardiopulmonary bypass in the course of coronary artery bypass graft surgery who are at an increased risk for blood loss and blood transfusion.	rs783147	275.1	Iron metabolism disorder	0.02589	1.665	0	0	0	NA	Novel	DKFZp779M0222	9071	A6PVI2:P00747:Q5TEH5	NP_000292.1:NP_001161810.1
Matrisome-associated	ECM Regulators	PLG	plasminogen	9071	aprotinin	for prophylactic use to reduce perioperative blood loss and the need for blood transfusion in patients undergoing cardiopulmonary bypass in the course of coronary artery bypass graft surgery who are at an increased risk for blood loss and blood transfusion.	rs783147	276.41	Acidosis	0.03125	0.7718	0	0	0	NA	Novel	DKFZp779M0222	9071	A6PVI2:P00747:Q5TEH5	NP_000292.1:NP_001161810.1
Matrisome-associated	ECM Regulators	PLG	plasminogen	9071	aprotinin	for prophylactic use to reduce perioperative blood loss and the need for blood transfusion in patients undergoing cardiopulmonary bypass in the course of coronary artery bypass graft surgery who are at an increased risk for blood loss and blood transfusion.	rs783147	276.6	Fluid overload	0.04878	0.8375	0	0	0	NA	Novel	DKFZp779M0222	9071	A6PVI2:P00747:Q5TEH5	NP_000292.1:NP_001161810.1
Matrisome-associated	ECM Regulators	PLG	plasminogen	9071	aprotinin	for prophylactic use to reduce perioperative blood loss and the need for blood transfusion in patients undergoing cardiopulmonary bypass in the course of coronary artery bypass graft surgery who are at an increased risk for blood loss and blood transfusion.	rs783147	278.3	Localized adiposity	0.03098	1.678	0	0	0	NA	Novel	DKFZp779M0222	9071	A6PVI2:P00747:Q5TEH5	NP_000292.1:NP_001161810.1
Matrisome-associated	ECM Regulators	PLG	plasminogen	9071	aprotinin	for prophylactic use to reduce perioperative blood loss and the need for blood transfusion in patients undergoing cardiopulmonary bypass in the course of coronary artery bypass graft surgery who are at an increased risk for blood loss and blood transfusion.	rs783147	286.8	Hypercoagulable state	0.01646	1.435	0	5	0	NA	Likely	DKFZp779M0222	9071	A6PVI2:P00747:Q5TEH5	NP_000292.1:NP_001161810.1
Matrisome-associated	ECM Regulators	PLG	plasminogen	9071	aprotinin	for prophylactic use to reduce perioperative blood loss and the need for blood transfusion in patients undergoing cardiopulmonary bypass in the course of coronary artery bypass graft surgery who are at an increased risk for blood loss and blood transfusion.	rs783147	290.12	Dementia with cerebral degenerations	0.03115	1.415	0	0	0	NA	Novel	DKFZp779M0222	9071	A6PVI2:P00747:Q5TEH5	NP_000292.1:NP_001161810.1
Matrisome-associated	ECM Regulators	PLG	plasminogen	9071	aprotinin	for prophylactic use to reduce perioperative blood loss and the need for blood transfusion in patients undergoing cardiopulmonary bypass in the course of coronary artery bypass graft surgery who are at an increased risk for blood loss and blood transfusion.	rs783147	300.11	Generalized anxiety disorder	0.007966	0.7736	0	0	0	NA	Novel	DKFZp779M0222	9071	A6PVI2:P00747:Q5TEH5	NP_000292.1:NP_001161810.1
Matrisome-associated	ECM Regulators	PLG	plasminogen	9071	aprotinin	for prophylactic use to reduce perioperative blood loss and the need for blood transfusion in patients undergoing cardiopulmonary bypass in the course of coronary artery bypass graft surgery who are at an increased risk for blood loss and blood transfusion.	rs783147	303.31	Gastrointestinal malfunction arising from mental factors	0.02949	1.769	0	0	0	NA	Novel	DKFZp779M0222	9071	A6PVI2:P00747:Q5TEH5	NP_000292.1:NP_001161810.1
Matrisome-associated	ECM Regulators	PLG	plasminogen	9071	aprotinin	for prophylactic use to reduce perioperative blood loss and the need for blood transfusion in patients undergoing cardiopulmonary bypass in the course of coronary artery bypass graft surgery who are at an increased risk for blood loss and blood transfusion.	rs783147	312	Conduct disorders	0.03156	1.424	0	0	0	NA	Novel	DKFZp779M0222	9071	A6PVI2:P00747:Q5TEH5	NP_000292.1:NP_001161810.1
Matrisome-associated	ECM Regulators	PLG	plasminogen	9071	aprotinin	for prophylactic use to reduce perioperative blood loss and the need for blood transfusion in patients undergoing cardiopulmonary bypass in the course of coronary artery bypass graft surgery who are at an increased risk for blood loss and blood transfusion.	rs783147	327.31	Central/nonobstroctive sleep apnea	0.04476	1.45	0	0	0	NA	Novel	DKFZp779M0222	9071	A6PVI2:P00747:Q5TEH5	NP_000292.1:NP_001161810.1
Matrisome-associated	ECM Regulators	PLG	plasminogen	9071	aprotinin	for prophylactic use to reduce perioperative blood loss and the need for blood transfusion in patients undergoing cardiopulmonary bypass in the course of coronary artery bypass graft surgery who are at an increased risk for blood loss and blood transfusion.	rs783147	327.4	Insomnia	0.03776	0.8895	0	0	0	NA	Novel	DKFZp779M0222	9071	A6PVI2:P00747:Q5TEH5	NP_000292.1:NP_001161810.1
Matrisome-associated	ECM Regulators	PLG	plasminogen	9071	aprotinin	for prophylactic use to reduce perioperative blood loss and the need for blood transfusion in patients undergoing cardiopulmonary bypass in the course of coronary artery bypass graft surgery who are at an increased risk for blood loss and blood transfusion.	rs783147	339	Other headache syndromes	0.008379	1.099	0	0	0	NA	Novel	DKFZp779M0222	9071	A6PVI2:P00747:Q5TEH5	NP_000292.1:NP_001161810.1
Matrisome-associated	ECM Regulators	PLG	plasminogen	9071	aprotinin	for prophylactic use to reduce perioperative blood loss and the need for blood transfusion in patients undergoing cardiopulmonary bypass in the course of coronary artery bypass graft surgery who are at an increased risk for blood loss and blood transfusion.	rs783147	350.5	Abnormal reflex	0.01302	2.06	0	50	0	NA	Likely	DKFZp779M0222	9071	A6PVI2:P00747:Q5TEH5	NP_000292.1:NP_001161810.1
Matrisome-associated	ECM Regulators	PLG	plasminogen	9071	aprotinin	for prophylactic use to reduce perioperative blood loss and the need for blood transfusion in patients undergoing cardiopulmonary bypass in the course of coronary artery bypass graft surgery who are at an increased risk for blood loss and blood transfusion.	rs783147	360	Disorders of the globe	0.02866	0.7331	0	0	0	NA	Novel	DKFZp779M0222	9071	A6PVI2:P00747:Q5TEH5	NP_000292.1:NP_001161810.1
Matrisome-associated	ECM Regulators	PLG	plasminogen	9071	aprotinin	for prophylactic use to reduce perioperative blood loss and the need for blood transfusion in patients undergoing cardiopulmonary bypass in the course of coronary artery bypass graft surgery who are at an increased risk for blood loss and blood transfusion.	rs783147	360.2	progressive myopia	0.002508	0.509	0	29	0	NA	Likely	DKFZp779M0222	9071	A6PVI2:P00747:Q5TEH5	NP_000292.1:NP_001161810.1
Matrisome-associated	ECM Regulators	PLG	plasminogen	9071	aprotinin	for prophylactic use to reduce perioperative blood loss and the need for blood transfusion in patients undergoing cardiopulmonary bypass in the course of coronary artery bypass graft surgery who are at an increased risk for blood loss and blood transfusion.	rs783147	362.26	Macular puckering of retina	0.04058	1.158	0	9	0	NA	Likely	DKFZp779M0222	9071	A6PVI2:P00747:Q5TEH5	NP_000292.1:NP_001161810.1
Matrisome-associated	ECM Regulators	PLG	plasminogen	9071	aprotinin	for prophylactic use to reduce perioperative blood loss and the need for blood transfusion in patients undergoing cardiopulmonary bypass in the course of coronary artery bypass graft surgery who are at an increased risk for blood loss and blood transfusion.	rs783147	366.1	Nonsenile Cataract	0.01302	0.744	0	0	0	NA	Novel	DKFZp779M0222	9071	A6PVI2:P00747:Q5TEH5	NP_000292.1:NP_001161810.1
Matrisome-associated	ECM Regulators	PLG	plasminogen	9071	aprotinin	for prophylactic use to reduce perioperative blood loss and the need for blood transfusion in patients undergoing cardiopulmonary bypass in the course of coronary artery bypass graft surgery who are at an increased risk for blood loss and blood transfusion.	rs783147	367	Disorders of refraction and accommodation	0.04751	0.9309	0	0	0	NA	Novel	DKFZp779M0222	9071	A6PVI2:P00747:Q5TEH5	NP_000292.1:NP_001161810.1
Matrisome-associated	ECM Regulators	PLG	plasminogen	9071	aprotinin	for prophylactic use to reduce perioperative blood loss and the need for blood transfusion in patients undergoing cardiopulmonary bypass in the course of coronary artery bypass graft surgery who are at an increased risk for blood loss and blood transfusion.	rs783147	367.9	Blindness and low vision	0.01465	0.7842	0	552	1	NA	Strongly supported	DKFZp779M0222	9071	A6PVI2:P00747:Q5TEH5	NP_000292.1:NP_001161810.1
Matrisome-associated	ECM Regulators	PLG	plasminogen	9071	aprotinin	for prophylactic use to reduce perioperative blood loss and the need for blood transfusion in patients undergoing cardiopulmonary bypass in the course of coronary artery bypass graft surgery who are at an increased risk for blood loss and blood transfusion.	rs783147	385	Other disorders of middle ear and mastoid	0.03163	0.7359	0	1	0	NA	Likely	DKFZp779M0222	9071	A6PVI2:P00747:Q5TEH5	NP_000292.1:NP_001161810.1
Matrisome-associated	ECM Regulators	PLG	plasminogen	9071	aprotinin	for prophylactic use to reduce perioperative blood loss and the need for blood transfusion in patients undergoing cardiopulmonary bypass in the course of coronary artery bypass graft surgery who are at an increased risk for blood loss and blood transfusion.	rs783147	411.41	Aneurysm and dissection of heart	0.03332	1.71	0	315	1	NA	Strongly supported	DKFZp779M0222	9071	A6PVI2:P00747:Q5TEH5	NP_000292.1:NP_001161810.1
Matrisome-associated	ECM Regulators	PLG	plasminogen	9071	aprotinin	for prophylactic use to reduce perioperative blood loss and the need for blood transfusion in patients undergoing cardiopulmonary bypass in the course of coronary artery bypass graft surgery who are at an increased risk for blood loss and blood transfusion.	rs783147	416	Cardiomegaly	0.02991	0.8912	0	0	0	NA	Novel	DKFZp779M0222	9071	A6PVI2:P00747:Q5TEH5	NP_000292.1:NP_001161810.1
Matrisome-associated	ECM Regulators	PLG	plasminogen	9071	aprotinin	for prophylactic use to reduce perioperative blood loss and the need for blood transfusion in patients undergoing cardiopulmonary bypass in the course of coronary artery bypass graft surgery who are at an increased risk for blood loss and blood transfusion.	rs783147	427.7	Tachycardia NOS	0.04458	0.878	0	5	0	NA	Likely	DKFZp779M0222	9071	A6PVI2:P00747:Q5TEH5	NP_000292.1:NP_001161810.1
Matrisome-associated	ECM Regulators	PLG	plasminogen	9071	aprotinin	for prophylactic use to reduce perioperative blood loss and the need for blood transfusion in patients undergoing cardiopulmonary bypass in the course of coronary artery bypass graft surgery who are at an increased risk for blood loss and blood transfusion.	rs783147	428.2	Heart failure NOS	0.02398	0.8083	0	25	0	NA	Likely	DKFZp779M0222	9071	A6PVI2:P00747:Q5TEH5	NP_000292.1:NP_001161810.1
Matrisome-associated	ECM Regulators	PLG	plasminogen	9071	aprotinin	for prophylactic use to reduce perioperative blood loss and the need for blood transfusion in patients undergoing cardiopulmonary bypass in the course of coronary artery bypass graft surgery who are at an increased risk for blood loss and blood transfusion.	rs783147	429	Ill-defined descriptions and complications of heart disease	0.04698	0.9242	0	56	0	NA	Likely	DKFZp779M0222	9071	A6PVI2:P00747:Q5TEH5	NP_000292.1:NP_001161810.1
Matrisome-associated	ECM Regulators	PLG	plasminogen	9071	aprotinin	for prophylactic use to reduce perioperative blood loss and the need for blood transfusion in patients undergoing cardiopulmonary bypass in the course of coronary artery bypass graft surgery who are at an increased risk for blood loss and blood transfusion.	rs783147	429.3	Symptoms involving cardiovascular system	0.01501	0.8744	0	4	0	NA	Likely	DKFZp779M0222	9071	A6PVI2:P00747:Q5TEH5	NP_000292.1:NP_001161810.1
Matrisome-associated	ECM Regulators	PLG	plasminogen	9071	aprotinin	for prophylactic use to reduce perioperative blood loss and the need for blood transfusion in patients undergoing cardiopulmonary bypass in the course of coronary artery bypass graft surgery who are at an increased risk for blood loss and blood transfusion.	rs783147	433.1	Occlusion and stenosis of precerebral arteries	0.0227	0.8983	0	15	0	NA	Likely	DKFZp779M0222	9071	A6PVI2:P00747:Q5TEH5	NP_000292.1:NP_001161810.1
Matrisome-associated	ECM Regulators	PLG	plasminogen	9071	aprotinin	for prophylactic use to reduce perioperative blood loss and the need for blood transfusion in patients undergoing cardiopulmonary bypass in the course of coronary artery bypass graft surgery who are at an increased risk for blood loss and blood transfusion.	rs783147	443.9	Peripheral arterial disease	0.0395	0.9137	0	1	0	NA	Likely	DKFZp779M0222	9071	A6PVI2:P00747:Q5TEH5	NP_000292.1:NP_001161810.1
Matrisome-associated	ECM Regulators	PLG	plasminogen	9071	aprotinin	for prophylactic use to reduce perioperative blood loss and the need for blood transfusion in patients undergoing cardiopulmonary bypass in the course of coronary artery bypass graft surgery who are at an increased risk for blood loss and blood transfusion.	rs783147	473.1	Chronic laryngitis	0.02936	1.692	0	0	0	NA	Novel	DKFZp779M0222	9071	A6PVI2:P00747:Q5TEH5	NP_000292.1:NP_001161810.1
Matrisome-associated	ECM Regulators	PLG	plasminogen	9071	aprotinin	for prophylactic use to reduce perioperative blood loss and the need for blood transfusion in patients undergoing cardiopulmonary bypass in the course of coronary artery bypass graft surgery who are at an increased risk for blood loss and blood transfusion.	rs783147	497	Bronchitis	0.03885	0.9051	0	6	0	NA	Likely	DKFZp779M0222	9071	A6PVI2:P00747:Q5TEH5	NP_000292.1:NP_001161810.1
Matrisome-associated	ECM Regulators	PLG	plasminogen	9071	aprotinin	for prophylactic use to reduce perioperative blood loss and the need for blood transfusion in patients undergoing cardiopulmonary bypass in the course of coronary artery bypass graft surgery who are at an increased risk for blood loss and blood transfusion.	rs783147	510.1	Lung involvement in conditions classified elsewhere	0.03946	1.716	0	0	0	NA	Novel	DKFZp779M0222	9071	A6PVI2:P00747:Q5TEH5	NP_000292.1:NP_001161810.1
Matrisome-associated	ECM Regulators	PLG	plasminogen	9071	aprotinin	for prophylactic use to reduce perioperative blood loss and the need for blood transfusion in patients undergoing cardiopulmonary bypass in the course of coronary artery bypass graft surgery who are at an increased risk for blood loss and blood transfusion.	rs783147	516	Abnormal sputum	0.04862	1.221	0	0	0	NA	Novel	DKFZp779M0222	9071	A6PVI2:P00747:Q5TEH5	NP_000292.1:NP_001161810.1
Matrisome-associated	ECM Regulators	PLG	plasminogen	9071	aprotinin	for prophylactic use to reduce perioperative blood loss and the need for blood transfusion in patients undergoing cardiopulmonary bypass in the course of coronary artery bypass graft surgery who are at an increased risk for blood loss and blood transfusion.	rs783147	530	Diseases of esophagus	0.02616	1.069	0	0	0	NA	Novel	DKFZp779M0222	9071	A6PVI2:P00747:Q5TEH5	NP_000292.1:NP_001161810.1
Matrisome-associated	ECM Regulators	PLG	plasminogen	9071	aprotinin	for prophylactic use to reduce perioperative blood loss and the need for blood transfusion in patients undergoing cardiopulmonary bypass in the course of coronary artery bypass graft surgery who are at an increased risk for blood loss and blood transfusion.	rs783147	530.11	GERD	0.0356	1.07	0	0	0	NA	Novel	DKFZp779M0222	9071	A6PVI2:P00747:Q5TEH5	NP_000292.1:NP_001161810.1
Matrisome-associated	ECM Regulators	PLG	plasminogen	9071	aprotinin	for prophylactic use to reduce perioperative blood loss and the need for blood transfusion in patients undergoing cardiopulmonary bypass in the course of coronary artery bypass graft surgery who are at an increased risk for blood loss and blood transfusion.	rs783147	535	Gastritis and duodenitis	0.006081	1.144	0	1	0	NA	Likely	DKFZp779M0222	9071	A6PVI2:P00747:Q5TEH5	NP_000292.1:NP_001161810.1
Matrisome-associated	ECM Regulators	PLG	plasminogen	9071	aprotinin	for prophylactic use to reduce perioperative blood loss and the need for blood transfusion in patients undergoing cardiopulmonary bypass in the course of coronary artery bypass graft surgery who are at an increased risk for blood loss and blood transfusion.	rs783147	535.8	Other specified gastritis	0.04039	1.195	0	1	0	NA	Likely	DKFZp779M0222	9071	A6PVI2:P00747:Q5TEH5	NP_000292.1:NP_001161810.1
Matrisome-associated	ECM Regulators	PLG	plasminogen	9071	aprotinin	for prophylactic use to reduce perioperative blood loss and the need for blood transfusion in patients undergoing cardiopulmonary bypass in the course of coronary artery bypass graft surgery who are at an increased risk for blood loss and blood transfusion.	rs783147	550	Abdominal hernia	0.02804	1.077	0	62	1	NA	Strongly supported	DKFZp779M0222	9071	A6PVI2:P00747:Q5TEH5	NP_000292.1:NP_001161810.1
Matrisome-associated	ECM Regulators	PLG	plasminogen	9071	aprotinin	for prophylactic use to reduce perioperative blood loss and the need for blood transfusion in patients undergoing cardiopulmonary bypass in the course of coronary artery bypass graft surgery who are at an increased risk for blood loss and blood transfusion.	rs783147	550.4	Umbilical hernia	0.001594	1.322	0	30	0	NA	Likely	DKFZp779M0222	9071	A6PVI2:P00747:Q5TEH5	NP_000292.1:NP_001161810.1
Matrisome-associated	ECM Regulators	PLG	plasminogen	9071	aprotinin	for prophylactic use to reduce perioperative blood loss and the need for blood transfusion in patients undergoing cardiopulmonary bypass in the course of coronary artery bypass graft surgery who are at an increased risk for blood loss and blood transfusion.	rs783147	550.6	Incisional hernia	0.003328	1.326	0	0	0	NA	Novel	DKFZp779M0222	9071	A6PVI2:P00747:Q5TEH5	NP_000292.1:NP_001161810.1
Matrisome-associated	ECM Regulators	PLG	plasminogen	9071	aprotinin	for prophylactic use to reduce perioperative blood loss and the need for blood transfusion in patients undergoing cardiopulmonary bypass in the course of coronary artery bypass graft surgery who are at an increased risk for blood loss and blood transfusion.	rs783147	557	Intestinal malabsorption	0.01877	1.313	0	0	0	NA	Novel	DKFZp779M0222	9071	A6PVI2:P00747:Q5TEH5	NP_000292.1:NP_001161810.1
Matrisome-associated	ECM Regulators	PLG	plasminogen	9071	aprotinin	for prophylactic use to reduce perioperative blood loss and the need for blood transfusion in patients undergoing cardiopulmonary bypass in the course of coronary artery bypass graft surgery who are at an increased risk for blood loss and blood transfusion.	rs783147	557.1	Celiac or tropical sprue	0.01914	1.63	0	5	0	NA	Likely	DKFZp779M0222	9071	A6PVI2:P00747:Q5TEH5	NP_000292.1:NP_001161810.1
Matrisome-associated	ECM Regulators	PLG	plasminogen	9071	aprotinin	for prophylactic use to reduce perioperative blood loss and the need for blood transfusion in patients undergoing cardiopulmonary bypass in the course of coronary artery bypass graft surgery who are at an increased risk for blood loss and blood transfusion.	rs783147	557.11	Celiac disease	0.0322	1.577	0	0	0	NA	Novel	DKFZp779M0222	9071	A6PVI2:P00747:Q5TEH5	NP_000292.1:NP_001161810.1
Matrisome-associated	ECM Regulators	PLG	plasminogen	9071	aprotinin	for prophylactic use to reduce perioperative blood loss and the need for blood transfusion in patients undergoing cardiopulmonary bypass in the course of coronary artery bypass graft surgery who are at an increased risk for blood loss and blood transfusion.	rs783147	557.9	Intestinal malabsorption NOS	0.02064	1.548	0	0	0	NA	Novel	DKFZp779M0222	9071	A6PVI2:P00747:Q5TEH5	NP_000292.1:NP_001161810.1
Matrisome-associated	ECM Regulators	PLG	plasminogen	9071	aprotinin	for prophylactic use to reduce perioperative blood loss and the need for blood transfusion in patients undergoing cardiopulmonary bypass in the course of coronary artery bypass graft surgery who are at an increased risk for blood loss and blood transfusion.	rs783147	561	Symptoms involving digestive system	0.02343	1.181	0	0	0	NA	Novel	DKFZp779M0222	9071	A6PVI2:P00747:Q5TEH5	NP_000292.1:NP_001161810.1
Matrisome-associated	ECM Regulators	PLG	plasminogen	9071	aprotinin	for prophylactic use to reduce perioperative blood loss and the need for blood transfusion in patients undergoing cardiopulmonary bypass in the course of coronary artery bypass graft surgery who are at an increased risk for blood loss and blood transfusion.	rs783147	585.2	Renal failure NOS	0.03035	0.7946	0	100	1	NA	Strongly supported	DKFZp779M0222	9071	A6PVI2:P00747:Q5TEH5	NP_000292.1:NP_001161810.1
Matrisome-associated	ECM Regulators	PLG	plasminogen	9071	aprotinin	for prophylactic use to reduce perioperative blood loss and the need for blood transfusion in patients undergoing cardiopulmonary bypass in the course of coronary artery bypass graft surgery who are at an increased risk for blood loss and blood transfusion.	rs783147	586.4	Stricture/obstruction of ureter	0.0141	0.6961	0	3	0	NA	Likely	DKFZp779M0222	9071	A6PVI2:P00747:Q5TEH5	NP_000292.1:NP_001161810.1
Matrisome-associated	ECM Regulators	PLG	plasminogen	9071	aprotinin	for prophylactic use to reduce perioperative blood loss and the need for blood transfusion in patients undergoing cardiopulmonary bypass in the course of coronary artery bypass graft surgery who are at an increased risk for blood loss and blood transfusion.	rs783147	595	Hydronephrosis	0.03584	0.79990000000000006	0	0	0	NA	Novel	DKFZp779M0222	9071	A6PVI2:P00747:Q5TEH5	NP_000292.1:NP_001161810.1
Matrisome-associated	ECM Regulators	PLG	plasminogen	9071	aprotinin	for prophylactic use to reduce perioperative blood loss and the need for blood transfusion in patients undergoing cardiopulmonary bypass in the course of coronary artery bypass graft surgery who are at an increased risk for blood loss and blood transfusion.	rs783147	596.5	Functional disorders of bladder	0.02041	1.253	0	12	1	NA	Strongly supported	DKFZp779M0222	9071	A6PVI2:P00747:Q5TEH5	NP_000292.1:NP_001161810.1
Matrisome-associated	ECM Regulators	PLG	plasminogen	9071	aprotinin	for prophylactic use to reduce perioperative blood loss and the need for blood transfusion in patients undergoing cardiopulmonary bypass in the course of coronary artery bypass graft surgery who are at an increased risk for blood loss and blood transfusion.	rs783147	598.4	Other cells and casts in urine	0.01652	0.7195	0	0	0	NA	Novel	DKFZp779M0222	9071	A6PVI2:P00747:Q5TEH5	NP_000292.1:NP_001161810.1
Matrisome-associated	ECM Regulators	PLG	plasminogen	9071	aprotinin	for prophylactic use to reduce perioperative blood loss and the need for blood transfusion in patients undergoing cardiopulmonary bypass in the course of coronary artery bypass graft surgery who are at an increased risk for blood loss and blood transfusion.	rs783147	614.53	Cyst or abscess of Bartholin's gland	0.04431	1.659	0	10	0	NA	Likely	DKFZp779M0222	9071	A6PVI2:P00747:Q5TEH5	NP_000292.1:NP_001161810.1
Matrisome-associated	ECM Regulators	PLG	plasminogen	9071	aprotinin	for prophylactic use to reduce perioperative blood loss and the need for blood transfusion in patients undergoing cardiopulmonary bypass in the course of coronary artery bypass graft surgery who are at an increased risk for blood loss and blood transfusion.	rs783147	619.4	Noninflammatory disorders of vagina	0.02176	0.7728	0	0	0	NA	Novel	DKFZp779M0222	9071	A6PVI2:P00747:Q5TEH5	NP_000292.1:NP_001161810.1
Matrisome-associated	ECM Regulators	PLG	plasminogen	9071	aprotinin	for prophylactic use to reduce perioperative blood loss and the need for blood transfusion in patients undergoing cardiopulmonary bypass in the course of coronary artery bypass graft surgery who are at an increased risk for blood loss and blood transfusion.	rs783147	686.3	Pilonidal cyst	0.009994	0.4506	0	0	0	NA	Novel	DKFZp779M0222	9071	A6PVI2:P00747:Q5TEH5	NP_000292.1:NP_001161810.1
Matrisome-associated	ECM Regulators	PLG	plasminogen	9071	aprotinin	for prophylactic use to reduce perioperative blood loss and the need for blood transfusion in patients undergoing cardiopulmonary bypass in the course of coronary artery bypass graft surgery who are at an increased risk for blood loss and blood transfusion.	rs783147	695.6	Prurigo	0.01933	0.8033	0	0	0	NA	Novel	DKFZp779M0222	9071	A6PVI2:P00747:Q5TEH5	NP_000292.1:NP_001161810.1
Matrisome-associated	ECM Regulators	PLG	plasminogen	9071	aprotinin	for prophylactic use to reduce perioperative blood loss and the need for blood transfusion in patients undergoing cardiopulmonary bypass in the course of coronary artery bypass graft surgery who are at an increased risk for blood loss and blood transfusion.	rs783147	696	Psoriasis & related disorders	0.02901	1.182	0	305	2	NA	Strongly supported	DKFZp779M0222	9071	A6PVI2:P00747:Q5TEH5	NP_000292.1:NP_001161810.1
Matrisome-associated	ECM Regulators	PLG	plasminogen	9071	aprotinin	for prophylactic use to reduce perioperative blood loss and the need for blood transfusion in patients undergoing cardiopulmonary bypass in the course of coronary artery bypass graft surgery who are at an increased risk for blood loss and blood transfusion.	rs783147	709	Diffuse diseases of connective tissue	0.02748	1.21	0	0	0	NA	Novel	DKFZp779M0222	9071	A6PVI2:P00747:Q5TEH5	NP_000292.1:NP_001161810.1
Matrisome-associated	ECM Regulators	PLG	plasminogen	9071	aprotinin	for prophylactic use to reduce perioperative blood loss and the need for blood transfusion in patients undergoing cardiopulmonary bypass in the course of coronary artery bypass graft surgery who are at an increased risk for blood loss and blood transfusion.	rs783147	732	Osteochondropathies	0.02197	0.5637	0	0	0	NA	Novel	DKFZp779M0222	9071	A6PVI2:P00747:Q5TEH5	NP_000292.1:NP_001161810.1
Matrisome-associated	ECM Regulators	PLG	plasminogen	9071	aprotinin	for prophylactic use to reduce perioperative blood loss and the need for blood transfusion in patients undergoing cardiopulmonary bypass in the course of coronary artery bypass graft surgery who are at an increased risk for blood loss and blood transfusion.	rs783147	736.2	Acquired deformities of finger	0.03938	0.748	0	1	0	NA	Likely	DKFZp779M0222	9071	A6PVI2:P00747:Q5TEH5	NP_000292.1:NP_001161810.1
Matrisome-associated	ECM Regulators	PLG	plasminogen	9071	aprotinin	for prophylactic use to reduce perioperative blood loss and the need for blood transfusion in patients undergoing cardiopulmonary bypass in the course of coronary artery bypass graft surgery who are at an increased risk for blood loss and blood transfusion.	rs783147	736.6	Unequal leg length (acquired)	0.03822	1.338	0	0	0	NA	Novel	DKFZp779M0222	9071	A6PVI2:P00747:Q5TEH5	NP_000292.1:NP_001161810.1
Matrisome-associated	ECM Regulators	PLG	plasminogen	9071	aprotinin	for prophylactic use to reduce perioperative blood loss and the need for blood transfusion in patients undergoing cardiopulmonary bypass in the course of coronary artery bypass graft surgery who are at an increased risk for blood loss and blood transfusion.	rs783147	743.12	Behcet's syndrome	0.007743	0.6422	0	0	0	NA	Novel	DKFZp779M0222	9071	A6PVI2:P00747:Q5TEH5	NP_000292.1:NP_001161810.1
Matrisome-associated	ECM Regulators	PLG	plasminogen	9071	aprotinin	for prophylactic use to reduce perioperative blood loss and the need for blood transfusion in patients undergoing cardiopulmonary bypass in the course of coronary artery bypass graft surgery who are at an increased risk for blood loss and blood transfusion.	rs783147	801	Fracture of ankle and foot	0.029	0.8949	0	6	0	NA	Likely	DKFZp779M0222	9071	A6PVI2:P00747:Q5TEH5	NP_000292.1:NP_001161810.1
Matrisome-associated	ECM Regulators	PLG	plasminogen	9071	aprotinin	for prophylactic use to reduce perioperative blood loss and the need for blood transfusion in patients undergoing cardiopulmonary bypass in the course of coronary artery bypass graft surgery who are at an increased risk for blood loss and blood transfusion.	rs783147	855	Mechanical complication of nervous system device, implant, and graft	0.03239	1.716	0	6	0	NA	Likely	DKFZp779M0222	9071	A6PVI2:P00747:Q5TEH5	NP_000292.1:NP_001161810.1
Matrisome-associated	ECM Regulators	PLG	plasminogen	9071	aprotinin	for prophylactic use to reduce perioperative blood loss and the need for blood transfusion in patients undergoing cardiopulmonary bypass in the course of coronary artery bypass graft surgery who are at an increased risk for blood loss and blood transfusion.	rs783147	870.4	Open wound of nose and sinus	0.005933	2.074	0	14	0	NA	Likely	DKFZp779M0222	9071	A6PVI2:P00747:Q5TEH5	NP_000292.1:NP_001161810.1
Matrisome-associated	ECM Regulators	PLG	plasminogen	9071	aprotinin	for prophylactic use to reduce perioperative blood loss and the need for blood transfusion in patients undergoing cardiopulmonary bypass in the course of coronary artery bypass graft surgery who are at an increased risk for blood loss and blood transfusion.	rs783147	871.1	Open wound of hand except finger(s)	0.0363	0.8239	0	78	0	NA	Likely	DKFZp779M0222	9071	A6PVI2:P00747:Q5TEH5	NP_000292.1:NP_001161810.1
Matrisome-associated	ECM Regulators	PLG	plasminogen	9071	aprotinin	for prophylactic use to reduce perioperative blood loss and the need for blood transfusion in patients undergoing cardiopulmonary bypass in the course of coronary artery bypass graft surgery who are at an increased risk for blood loss and blood transfusion.	rs783147	941	Allergy to serum or vaccine	0.01722	1.633	0	13	0	NA	Likely	DKFZp779M0222	9071	A6PVI2:P00747:Q5TEH5	NP_000292.1:NP_001161810.1
Matrisome-associated	ECM Regulators	PLG	plasminogen	9071	reteplase	for lysis of acute pulmonary emboli, intracoronary emboli and management of myocardial infarction	rs783147	10	Tuberculosis	0.02059	1.749	0	0	0	NA	Novel	DKFZp779M0222	9071	A6PVI2:P00747:Q5TEH5	NP_000292.1:NP_001161810.1
Matrisome-associated	ECM Regulators	PLG	plasminogen	9071	reteplase	for lysis of acute pulmonary emboli, intracoronary emboli and management of myocardial infarction	rs783147	189.12	Malignant neoplasm of renal pelvis	0.02822	0.5091	0	0	0	NA	Novel	DKFZp779M0222	9071	A6PVI2:P00747:Q5TEH5	NP_000292.1:NP_001161810.1
Matrisome-associated	ECM Regulators	PLG	plasminogen	9071	reteplase	for lysis of acute pulmonary emboli, intracoronary emboli and management of myocardial infarction	rs783147	218.2	Benign neoplasm of uterus	0.03749	1.387	0	0	0	NA	Novel	DKFZp779M0222	9071	A6PVI2:P00747:Q5TEH5	NP_000292.1:NP_001161810.1
Matrisome-associated	ECM Regulators	PLG	plasminogen	9071	reteplase	for lysis of acute pulmonary emboli, intracoronary emboli and management of myocardial infarction	rs783147	227	Benign neoplasm of other endocrine glands	0.01906	0.7381	0	0	0	NA	Novel	DKFZp779M0222	9071	A6PVI2:P00747:Q5TEH5	NP_000292.1:NP_001161810.1
Matrisome-associated	ECM Regulators	PLG	plasminogen	9071	reteplase	for lysis of acute pulmonary emboli, intracoronary emboli and management of myocardial infarction	rs783147	275.1	Iron metabolism disorder	0.02589	1.665	0	0	0	NA	Novel	DKFZp779M0222	9071	A6PVI2:P00747:Q5TEH5	NP_000292.1:NP_001161810.1
Matrisome-associated	ECM Regulators	PLG	plasminogen	9071	reteplase	for lysis of acute pulmonary emboli, intracoronary emboli and management of myocardial infarction	rs783147	276.41	Acidosis	0.03125	0.7718	0	0	0	NA	Novel	DKFZp779M0222	9071	A6PVI2:P00747:Q5TEH5	NP_000292.1:NP_001161810.1
Matrisome-associated	ECM Regulators	PLG	plasminogen	9071	reteplase	for lysis of acute pulmonary emboli, intracoronary emboli and management of myocardial infarction	rs783147	276.6	Fluid overload	0.04878	0.8375	0	0	0	NA	Novel	DKFZp779M0222	9071	A6PVI2:P00747:Q5TEH5	NP_000292.1:NP_001161810.1
Matrisome-associated	ECM Regulators	PLG	plasminogen	9071	reteplase	for lysis of acute pulmonary emboli, intracoronary emboli and management of myocardial infarction	rs783147	278.3	Localized adiposity	0.03098	1.678	0	0	0	NA	Novel	DKFZp779M0222	9071	A6PVI2:P00747:Q5TEH5	NP_000292.1:NP_001161810.1
Matrisome-associated	ECM Regulators	PLG	plasminogen	9071	reteplase	for lysis of acute pulmonary emboli, intracoronary emboli and management of myocardial infarction	rs783147	286.8	Hypercoagulable state	0.01646	1.435	0	1	0	NA	Likely	DKFZp779M0222	9071	A6PVI2:P00747:Q5TEH5	NP_000292.1:NP_001161810.1
Matrisome-associated	ECM Regulators	PLG	plasminogen	9071	reteplase	for lysis of acute pulmonary emboli, intracoronary emboli and management of myocardial infarction	rs783147	290.12	Dementia with cerebral degenerations	0.03115	1.415	0	0	0	NA	Novel	DKFZp779M0222	9071	A6PVI2:P00747:Q5TEH5	NP_000292.1:NP_001161810.1
Matrisome-associated	ECM Regulators	PLG	plasminogen	9071	reteplase	for lysis of acute pulmonary emboli, intracoronary emboli and management of myocardial infarction	rs783147	300.11	Generalized anxiety disorder	0.007966	0.7736	0	0	0	NA	Novel	DKFZp779M0222	9071	A6PVI2:P00747:Q5TEH5	NP_000292.1:NP_001161810.1
Matrisome-associated	ECM Regulators	PLG	plasminogen	9071	reteplase	for lysis of acute pulmonary emboli, intracoronary emboli and management of myocardial infarction	rs783147	303.31	Gastrointestinal malfunction arising from mental factors	0.02949	1.769	0	0	0	NA	Novel	DKFZp779M0222	9071	A6PVI2:P00747:Q5TEH5	NP_000292.1:NP_001161810.1
Matrisome-associated	ECM Regulators	PLG	plasminogen	9071	reteplase	for lysis of acute pulmonary emboli, intracoronary emboli and management of myocardial infarction	rs783147	312	Conduct disorders	0.03156	1.424	0	0	0	NA	Novel	DKFZp779M0222	9071	A6PVI2:P00747:Q5TEH5	NP_000292.1:NP_001161810.1
Matrisome-associated	ECM Regulators	PLG	plasminogen	9071	reteplase	for lysis of acute pulmonary emboli, intracoronary emboli and management of myocardial infarction	rs783147	327.31	Central/nonobstroctive sleep apnea	0.04476	1.45	0	0	0	NA	Novel	DKFZp779M0222	9071	A6PVI2:P00747:Q5TEH5	NP_000292.1:NP_001161810.1
Matrisome-associated	ECM Regulators	PLG	plasminogen	9071	reteplase	for lysis of acute pulmonary emboli, intracoronary emboli and management of myocardial infarction	rs783147	327.4	Insomnia	0.03776	0.8895	0	0	0	NA	Novel	DKFZp779M0222	9071	A6PVI2:P00747:Q5TEH5	NP_000292.1:NP_001161810.1
Matrisome-associated	ECM Regulators	PLG	plasminogen	9071	reteplase	for lysis of acute pulmonary emboli, intracoronary emboli and management of myocardial infarction	rs783147	339	Other headache syndromes	0.008379	1.099	0	0	0	NA	Novel	DKFZp779M0222	9071	A6PVI2:P00747:Q5TEH5	NP_000292.1:NP_001161810.1
Matrisome-associated	ECM Regulators	PLG	plasminogen	9071	reteplase	for lysis of acute pulmonary emboli, intracoronary emboli and management of myocardial infarction	rs783147	350.5	Abnormal reflex	0.01302	2.06	0	0	0	NA	Novel	DKFZp779M0222	9071	A6PVI2:P00747:Q5TEH5	NP_000292.1:NP_001161810.1
Matrisome-associated	ECM Regulators	PLG	plasminogen	9071	reteplase	for lysis of acute pulmonary emboli, intracoronary emboli and management of myocardial infarction	rs783147	360	Disorders of the globe	0.02866	0.7331	0	0	0	NA	Novel	DKFZp779M0222	9071	A6PVI2:P00747:Q5TEH5	NP_000292.1:NP_001161810.1
Matrisome-associated	ECM Regulators	PLG	plasminogen	9071	reteplase	for lysis of acute pulmonary emboli, intracoronary emboli and management of myocardial infarction	rs783147	360.2	progressive myopia	0.002508	0.509	0	1	0	NA	Likely	DKFZp779M0222	9071	A6PVI2:P00747:Q5TEH5	NP_000292.1:NP_001161810.1
Matrisome-associated	ECM Regulators	PLG	plasminogen	9071	reteplase	for lysis of acute pulmonary emboli, intracoronary emboli and management of myocardial infarction	rs783147	362.26	Macular puckering of retina	0.04058	1.158	0	0	0	NA	Novel	DKFZp779M0222	9071	A6PVI2:P00747:Q5TEH5	NP_000292.1:NP_001161810.1
Matrisome-associated	ECM Regulators	PLG	plasminogen	9071	reteplase	for lysis of acute pulmonary emboli, intracoronary emboli and management of myocardial infarction	rs783147	366.1	Nonsenile Cataract	0.01302	0.744	0	0	0	NA	Novel	DKFZp779M0222	9071	A6PVI2:P00747:Q5TEH5	NP_000292.1:NP_001161810.1
Matrisome-associated	ECM Regulators	PLG	plasminogen	9071	reteplase	for lysis of acute pulmonary emboli, intracoronary emboli and management of myocardial infarction	rs783147	367	Disorders of refraction and accommodation	0.04751	0.9309	0	0	0	NA	Novel	DKFZp779M0222	9071	A6PVI2:P00747:Q5TEH5	NP_000292.1:NP_001161810.1
Matrisome-associated	ECM Regulators	PLG	plasminogen	9071	reteplase	for lysis of acute pulmonary emboli, intracoronary emboli and management of myocardial infarction	rs783147	367.9	Blindness and low vision	0.01465	0.7842	0	42	0	NA	Likely	DKFZp779M0222	9071	A6PVI2:P00747:Q5TEH5	NP_000292.1:NP_001161810.1
Matrisome-associated	ECM Regulators	PLG	plasminogen	9071	reteplase	for lysis of acute pulmonary emboli, intracoronary emboli and management of myocardial infarction	rs783147	385	Other disorders of middle ear and mastoid	0.03163	0.7359	0	0	0	NA	Novel	DKFZp779M0222	9071	A6PVI2:P00747:Q5TEH5	NP_000292.1:NP_001161810.1
Matrisome-associated	ECM Regulators	PLG	plasminogen	9071	reteplase	for lysis of acute pulmonary emboli, intracoronary emboli and management of myocardial infarction	rs783147	411.41	Aneurysm and dissection of heart	0.03332	1.71	0	28	1	NA	Strongly supported	DKFZp779M0222	9071	A6PVI2:P00747:Q5TEH5	NP_000292.1:NP_001161810.1
Matrisome-associated	ECM Regulators	PLG	plasminogen	9071	reteplase	for lysis of acute pulmonary emboli, intracoronary emboli and management of myocardial infarction	rs783147	416	Cardiomegaly	0.02991	0.8912	0	0	0	NA	Novel	DKFZp779M0222	9071	A6PVI2:P00747:Q5TEH5	NP_000292.1:NP_001161810.1
Matrisome-associated	ECM Regulators	PLG	plasminogen	9071	reteplase	for lysis of acute pulmonary emboli, intracoronary emboli and management of myocardial infarction	rs783147	427.7	Tachycardia NOS	0.04458	0.878	0	3	0	NA	Likely	DKFZp779M0222	9071	A6PVI2:P00747:Q5TEH5	NP_000292.1:NP_001161810.1
Matrisome-associated	ECM Regulators	PLG	plasminogen	9071	reteplase	for lysis of acute pulmonary emboli, intracoronary emboli and management of myocardial infarction	rs783147	428.2	Heart failure NOS	0.02398	0.8083	0	12	0	NA	Likely	DKFZp779M0222	9071	A6PVI2:P00747:Q5TEH5	NP_000292.1:NP_001161810.1
Matrisome-associated	ECM Regulators	PLG	plasminogen	9071	reteplase	for lysis of acute pulmonary emboli, intracoronary emboli and management of myocardial infarction	rs783147	429	Ill-defined descriptions and complications of heart disease	0.04698	0.9242	0	5	0	NA	Likely	DKFZp779M0222	9071	A6PVI2:P00747:Q5TEH5	NP_000292.1:NP_001161810.1
Matrisome-associated	ECM Regulators	PLG	plasminogen	9071	reteplase	for lysis of acute pulmonary emboli, intracoronary emboli and management of myocardial infarction	rs783147	429.3	Symptoms involving cardiovascular system	0.01501	0.8744	0	0	0	NA	Novel	DKFZp779M0222	9071	A6PVI2:P00747:Q5TEH5	NP_000292.1:NP_001161810.1
Matrisome-associated	ECM Regulators	PLG	plasminogen	9071	reteplase	for lysis of acute pulmonary emboli, intracoronary emboli and management of myocardial infarction	rs783147	433.1	Occlusion and stenosis of precerebral arteries	0.0227	0.8983	0	2	0	NA	Likely	DKFZp779M0222	9071	A6PVI2:P00747:Q5TEH5	NP_000292.1:NP_001161810.1
Matrisome-associated	ECM Regulators	PLG	plasminogen	9071	reteplase	for lysis of acute pulmonary emboli, intracoronary emboli and management of myocardial infarction	rs783147	443.9	Peripheral arterial disease	0.0395	0.9137	0	2	0	NA	Likely	DKFZp779M0222	9071	A6PVI2:P00747:Q5TEH5	NP_000292.1:NP_001161810.1
Matrisome-associated	ECM Regulators	PLG	plasminogen	9071	reteplase	for lysis of acute pulmonary emboli, intracoronary emboli and management of myocardial infarction	rs783147	473.1	Chronic laryngitis	0.02936	1.692	0	0	0	NA	Novel	DKFZp779M0222	9071	A6PVI2:P00747:Q5TEH5	NP_000292.1:NP_001161810.1
Matrisome-associated	ECM Regulators	PLG	plasminogen	9071	reteplase	for lysis of acute pulmonary emboli, intracoronary emboli and management of myocardial infarction	rs783147	497	Bronchitis	0.03885	0.9051	0	0	0	NA	Novel	DKFZp779M0222	9071	A6PVI2:P00747:Q5TEH5	NP_000292.1:NP_001161810.1
Matrisome-associated	ECM Regulators	PLG	plasminogen	9071	reteplase	for lysis of acute pulmonary emboli, intracoronary emboli and management of myocardial infarction	rs783147	510.1	Lung involvement in conditions classified elsewhere	0.03946	1.716	0	0	0	NA	Novel	DKFZp779M0222	9071	A6PVI2:P00747:Q5TEH5	NP_000292.1:NP_001161810.1
Matrisome-associated	ECM Regulators	PLG	plasminogen	9071	reteplase	for lysis of acute pulmonary emboli, intracoronary emboli and management of myocardial infarction	rs783147	516	Abnormal sputum	0.04862	1.221	0	0	0	NA	Novel	DKFZp779M0222	9071	A6PVI2:P00747:Q5TEH5	NP_000292.1:NP_001161810.1
Matrisome-associated	ECM Regulators	PLG	plasminogen	9071	reteplase	for lysis of acute pulmonary emboli, intracoronary emboli and management of myocardial infarction	rs783147	530	Diseases of esophagus	0.02616	1.069	0	0	0	NA	Novel	DKFZp779M0222	9071	A6PVI2:P00747:Q5TEH5	NP_000292.1:NP_001161810.1
Matrisome-associated	ECM Regulators	PLG	plasminogen	9071	reteplase	for lysis of acute pulmonary emboli, intracoronary emboli and management of myocardial infarction	rs783147	530.11	GERD	0.0356	1.07	0	0	0	NA	Novel	DKFZp779M0222	9071	A6PVI2:P00747:Q5TEH5	NP_000292.1:NP_001161810.1
Matrisome-associated	ECM Regulators	PLG	plasminogen	9071	reteplase	for lysis of acute pulmonary emboli, intracoronary emboli and management of myocardial infarction	rs783147	535	Gastritis and duodenitis	0.006081	1.144	0	0	0	NA	Novel	DKFZp779M0222	9071	A6PVI2:P00747:Q5TEH5	NP_000292.1:NP_001161810.1
Matrisome-associated	ECM Regulators	PLG	plasminogen	9071	reteplase	for lysis of acute pulmonary emboli, intracoronary emboli and management of myocardial infarction	rs783147	535.8	Other specified gastritis	0.04039	1.195	0	0	0	NA	Novel	DKFZp779M0222	9071	A6PVI2:P00747:Q5TEH5	NP_000292.1:NP_001161810.1
Matrisome-associated	ECM Regulators	PLG	plasminogen	9071	reteplase	for lysis of acute pulmonary emboli, intracoronary emboli and management of myocardial infarction	rs783147	550	Abdominal hernia	0.02804	1.077	0	1	0	NA	Likely	DKFZp779M0222	9071	A6PVI2:P00747:Q5TEH5	NP_000292.1:NP_001161810.1
Matrisome-associated	ECM Regulators	PLG	plasminogen	9071	reteplase	for lysis of acute pulmonary emboli, intracoronary emboli and management of myocardial infarction	rs783147	550.4	Umbilical hernia	0.001594	1.322	0	0	0	NA	Novel	DKFZp779M0222	9071	A6PVI2:P00747:Q5TEH5	NP_000292.1:NP_001161810.1
Matrisome-associated	ECM Regulators	PLG	plasminogen	9071	reteplase	for lysis of acute pulmonary emboli, intracoronary emboli and management of myocardial infarction	rs783147	550.6	Incisional hernia	0.003328	1.326	0	0	0	NA	Novel	DKFZp779M0222	9071	A6PVI2:P00747:Q5TEH5	NP_000292.1:NP_001161810.1
Matrisome-associated	ECM Regulators	PLG	plasminogen	9071	reteplase	for lysis of acute pulmonary emboli, intracoronary emboli and management of myocardial infarction	rs783147	557	Intestinal malabsorption	0.01877	1.313	0	0	0	NA	Novel	DKFZp779M0222	9071	A6PVI2:P00747:Q5TEH5	NP_000292.1:NP_001161810.1
Matrisome-associated	ECM Regulators	PLG	plasminogen	9071	reteplase	for lysis of acute pulmonary emboli, intracoronary emboli and management of myocardial infarction	rs783147	557.1	Celiac or tropical sprue	0.01914	1.63	0	0	0	NA	Novel	DKFZp779M0222	9071	A6PVI2:P00747:Q5TEH5	NP_000292.1:NP_001161810.1
Matrisome-associated	ECM Regulators	PLG	plasminogen	9071	reteplase	for lysis of acute pulmonary emboli, intracoronary emboli and management of myocardial infarction	rs783147	557.11	Celiac disease	0.0322	1.577	0	0	0	NA	Novel	DKFZp779M0222	9071	A6PVI2:P00747:Q5TEH5	NP_000292.1:NP_001161810.1
Matrisome-associated	ECM Regulators	PLG	plasminogen	9071	reteplase	for lysis of acute pulmonary emboli, intracoronary emboli and management of myocardial infarction	rs783147	557.9	Intestinal malabsorption NOS	0.02064	1.548	0	0	0	NA	Novel	DKFZp779M0222	9071	A6PVI2:P00747:Q5TEH5	NP_000292.1:NP_001161810.1
Matrisome-associated	ECM Regulators	PLG	plasminogen	9071	reteplase	for lysis of acute pulmonary emboli, intracoronary emboli and management of myocardial infarction	rs783147	561	Symptoms involving digestive system	0.02343	1.181	0	0	0	NA	Novel	DKFZp779M0222	9071	A6PVI2:P00747:Q5TEH5	NP_000292.1:NP_001161810.1
Matrisome-associated	ECM Regulators	PLG	plasminogen	9071	reteplase	for lysis of acute pulmonary emboli, intracoronary emboli and management of myocardial infarction	rs783147	585.2	Renal failure NOS	0.03035	0.7946	0	2	0	NA	Likely	DKFZp779M0222	9071	A6PVI2:P00747:Q5TEH5	NP_000292.1:NP_001161810.1
Matrisome-associated	ECM Regulators	PLG	plasminogen	9071	reteplase	for lysis of acute pulmonary emboli, intracoronary emboli and management of myocardial infarction	rs783147	586.4	Stricture/obstruction of ureter	0.0141	0.6961	0	0	0	NA	Novel	DKFZp779M0222	9071	A6PVI2:P00747:Q5TEH5	NP_000292.1:NP_001161810.1
Matrisome-associated	ECM Regulators	PLG	plasminogen	9071	reteplase	for lysis of acute pulmonary emboli, intracoronary emboli and management of myocardial infarction	rs783147	595	Hydronephrosis	0.03584	0.79990000000000006	0	0	0	NA	Novel	DKFZp779M0222	9071	A6PVI2:P00747:Q5TEH5	NP_000292.1:NP_001161810.1
Matrisome-associated	ECM Regulators	PLG	plasminogen	9071	reteplase	for lysis of acute pulmonary emboli, intracoronary emboli and management of myocardial infarction	rs783147	596.5	Functional disorders of bladder	0.02041	1.253	0	0	0	NA	Novel	DKFZp779M0222	9071	A6PVI2:P00747:Q5TEH5	NP_000292.1:NP_001161810.1
Matrisome-associated	ECM Regulators	PLG	plasminogen	9071	reteplase	for lysis of acute pulmonary emboli, intracoronary emboli and management of myocardial infarction	rs783147	598.4	Other cells and casts in urine	0.01652	0.7195	0	0	0	NA	Novel	DKFZp779M0222	9071	A6PVI2:P00747:Q5TEH5	NP_000292.1:NP_001161810.1
Matrisome-associated	ECM Regulators	PLG	plasminogen	9071	reteplase	for lysis of acute pulmonary emboli, intracoronary emboli and management of myocardial infarction	rs783147	614.53	Cyst or abscess of Bartholin's gland	0.04431	1.659	0	0	0	NA	Novel	DKFZp779M0222	9071	A6PVI2:P00747:Q5TEH5	NP_000292.1:NP_001161810.1
Matrisome-associated	ECM Regulators	PLG	plasminogen	9071	reteplase	for lysis of acute pulmonary emboli, intracoronary emboli and management of myocardial infarction	rs783147	619.4	Noninflammatory disorders of vagina	0.02176	0.7728	0	0	0	NA	Novel	DKFZp779M0222	9071	A6PVI2:P00747:Q5TEH5	NP_000292.1:NP_001161810.1
Matrisome-associated	ECM Regulators	PLG	plasminogen	9071	reteplase	for lysis of acute pulmonary emboli, intracoronary emboli and management of myocardial infarction	rs783147	686.3	Pilonidal cyst	0.009994	0.4506	0	0	0	NA	Novel	DKFZp779M0222	9071	A6PVI2:P00747:Q5TEH5	NP_000292.1:NP_001161810.1
Matrisome-associated	ECM Regulators	PLG	plasminogen	9071	reteplase	for lysis of acute pulmonary emboli, intracoronary emboli and management of myocardial infarction	rs783147	695.6	Prurigo	0.01933	0.8033	0	0	0	NA	Novel	DKFZp779M0222	9071	A6PVI2:P00747:Q5TEH5	NP_000292.1:NP_001161810.1
Matrisome-associated	ECM Regulators	PLG	plasminogen	9071	reteplase	for lysis of acute pulmonary emboli, intracoronary emboli and management of myocardial infarction	rs783147	696	Psoriasis & related disorders	0.02901	1.182	0	48	0	NA	Likely	DKFZp779M0222	9071	A6PVI2:P00747:Q5TEH5	NP_000292.1:NP_001161810.1
Matrisome-associated	ECM Regulators	PLG	plasminogen	9071	reteplase	for lysis of acute pulmonary emboli, intracoronary emboli and management of myocardial infarction	rs783147	709	Diffuse diseases of connective tissue	0.02748	1.21	0	0	0	NA	Novel	DKFZp779M0222	9071	A6PVI2:P00747:Q5TEH5	NP_000292.1:NP_001161810.1
Matrisome-associated	ECM Regulators	PLG	plasminogen	9071	reteplase	for lysis of acute pulmonary emboli, intracoronary emboli and management of myocardial infarction	rs783147	732	Osteochondropathies	0.02197	0.5637	0	0	0	NA	Novel	DKFZp779M0222	9071	A6PVI2:P00747:Q5TEH5	NP_000292.1:NP_001161810.1
Matrisome-associated	ECM Regulators	PLG	plasminogen	9071	reteplase	for lysis of acute pulmonary emboli, intracoronary emboli and management of myocardial infarction	rs783147	736.2	Acquired deformities of finger	0.03938	0.748	0	2	0	NA	Likely	DKFZp779M0222	9071	A6PVI2:P00747:Q5TEH5	NP_000292.1:NP_001161810.1
Matrisome-associated	ECM Regulators	PLG	plasminogen	9071	reteplase	for lysis of acute pulmonary emboli, intracoronary emboli and management of myocardial infarction	rs783147	736.6	Unequal leg length (acquired)	0.03822	1.338	0	0	0	NA	Novel	DKFZp779M0222	9071	A6PVI2:P00747:Q5TEH5	NP_000292.1:NP_001161810.1
Matrisome-associated	ECM Regulators	PLG	plasminogen	9071	reteplase	for lysis of acute pulmonary emboli, intracoronary emboli and management of myocardial infarction	rs783147	743.12	Behcet's syndrome	0.007743	0.6422	0	0	0	NA	Novel	DKFZp779M0222	9071	A6PVI2:P00747:Q5TEH5	NP_000292.1:NP_001161810.1
Matrisome-associated	ECM Regulators	PLG	plasminogen	9071	reteplase	for lysis of acute pulmonary emboli, intracoronary emboli and management of myocardial infarction	rs783147	801	Fracture of ankle and foot	0.029	0.8949	0	1	0	NA	Likely	DKFZp779M0222	9071	A6PVI2:P00747:Q5TEH5	NP_000292.1:NP_001161810.1
Matrisome-associated	ECM Regulators	PLG	plasminogen	9071	reteplase	for lysis of acute pulmonary emboli, intracoronary emboli and management of myocardial infarction	rs783147	855	Mechanical complication of nervous system device, implant, and graft	0.03239	1.716	0	0	0	NA	Novel	DKFZp779M0222	9071	A6PVI2:P00747:Q5TEH5	NP_000292.1:NP_001161810.1
Matrisome-associated	ECM Regulators	PLG	plasminogen	9071	reteplase	for lysis of acute pulmonary emboli, intracoronary emboli and management of myocardial infarction	rs783147	870.4	Open wound of nose and sinus	0.005933	2.074	0	0	0	NA	Novel	DKFZp779M0222	9071	A6PVI2:P00747:Q5TEH5	NP_000292.1:NP_001161810.1
Matrisome-associated	ECM Regulators	PLG	plasminogen	9071	reteplase	for lysis of acute pulmonary emboli, intracoronary emboli and management of myocardial infarction	rs783147	871.1	Open wound of hand except finger(s)	0.0363	0.8239	0	4	0	NA	Likely	DKFZp779M0222	9071	A6PVI2:P00747:Q5TEH5	NP_000292.1:NP_001161810.1
Matrisome-associated	ECM Regulators	PLG	plasminogen	9071	reteplase	for lysis of acute pulmonary emboli, intracoronary emboli and management of myocardial infarction	rs783147	941	Allergy to serum or vaccine	0.01722	1.633	0	2	0	NA	Likely	DKFZp779M0222	9071	A6PVI2:P00747:Q5TEH5	NP_000292.1:NP_001161810.1
Matrisome-associated	ECM Regulators	PLG	plasminogen	9071	streptokinase	for the treatment of acute evolving transmural myocardial infarction, pulmonary embolism, deep vein thrombosis, arterial thrombosis or emolism and occlusion of arteriovenous cannulae	rs783147	10	Tuberculosis	0.02059	1.749	0	16	0	NA	Likely	DKFZp779M0222	9071	A6PVI2:P00747:Q5TEH5	NP_000292.1:NP_001161810.1
Matrisome-associated	ECM Regulators	PLG	plasminogen	9071	streptokinase	for the treatment of acute evolving transmural myocardial infarction, pulmonary embolism, deep vein thrombosis, arterial thrombosis or emolism and occlusion of arteriovenous cannulae	rs783147	189.12	Malignant neoplasm of renal pelvis	0.02822	0.5091	0	2	0	NA	Likely	DKFZp779M0222	9071	A6PVI2:P00747:Q5TEH5	NP_000292.1:NP_001161810.1
Matrisome-associated	ECM Regulators	PLG	plasminogen	9071	streptokinase	for the treatment of acute evolving transmural myocardial infarction, pulmonary embolism, deep vein thrombosis, arterial thrombosis or emolism and occlusion of arteriovenous cannulae	rs783147	218.2	Benign neoplasm of uterus	0.03749	1.387	0	1	0	NA	Likely	DKFZp779M0222	9071	A6PVI2:P00747:Q5TEH5	NP_000292.1:NP_001161810.1
Matrisome-associated	ECM Regulators	PLG	plasminogen	9071	streptokinase	for the treatment of acute evolving transmural myocardial infarction, pulmonary embolism, deep vein thrombosis, arterial thrombosis or emolism and occlusion of arteriovenous cannulae	rs783147	227	Benign neoplasm of other endocrine glands	0.01906	0.7381	0	0	0	NA	Novel	DKFZp779M0222	9071	A6PVI2:P00747:Q5TEH5	NP_000292.1:NP_001161810.1
Matrisome-associated	ECM Regulators	PLG	plasminogen	9071	streptokinase	for the treatment of acute evolving transmural myocardial infarction, pulmonary embolism, deep vein thrombosis, arterial thrombosis or emolism and occlusion of arteriovenous cannulae	rs783147	275.1	Iron metabolism disorder	0.02589	1.665	0	0	0	NA	Novel	DKFZp779M0222	9071	A6PVI2:P00747:Q5TEH5	NP_000292.1:NP_001161810.1
Matrisome-associated	ECM Regulators	PLG	plasminogen	9071	streptokinase	for the treatment of acute evolving transmural myocardial infarction, pulmonary embolism, deep vein thrombosis, arterial thrombosis or emolism and occlusion of arteriovenous cannulae	rs783147	276.41	Acidosis	0.03125	0.7718	0	0	0	NA	Novel	DKFZp779M0222	9071	A6PVI2:P00747:Q5TEH5	NP_000292.1:NP_001161810.1
Matrisome-associated	ECM Regulators	PLG	plasminogen	9071	streptokinase	for the treatment of acute evolving transmural myocardial infarction, pulmonary embolism, deep vein thrombosis, arterial thrombosis or emolism and occlusion of arteriovenous cannulae	rs783147	276.6	Fluid overload	0.04878	0.8375	0	0	0	NA	Novel	DKFZp779M0222	9071	A6PVI2:P00747:Q5TEH5	NP_000292.1:NP_001161810.1
Matrisome-associated	ECM Regulators	PLG	plasminogen	9071	streptokinase	for the treatment of acute evolving transmural myocardial infarction, pulmonary embolism, deep vein thrombosis, arterial thrombosis or emolism and occlusion of arteriovenous cannulae	rs783147	278.3	Localized adiposity	0.03098	1.678	0	0	0	NA	Novel	DKFZp779M0222	9071	A6PVI2:P00747:Q5TEH5	NP_000292.1:NP_001161810.1
Matrisome-associated	ECM Regulators	PLG	plasminogen	9071	streptokinase	for the treatment of acute evolving transmural myocardial infarction, pulmonary embolism, deep vein thrombosis, arterial thrombosis or emolism and occlusion of arteriovenous cannulae	rs783147	286.8	Hypercoagulable state	0.01646	1.435	0	4	0	NA	Likely	DKFZp779M0222	9071	A6PVI2:P00747:Q5TEH5	NP_000292.1:NP_001161810.1
Matrisome-associated	ECM Regulators	PLG	plasminogen	9071	streptokinase	for the treatment of acute evolving transmural myocardial infarction, pulmonary embolism, deep vein thrombosis, arterial thrombosis or emolism and occlusion of arteriovenous cannulae	rs783147	290.12	Dementia with cerebral degenerations	0.03115	1.415	0	1	0	NA	Likely	DKFZp779M0222	9071	A6PVI2:P00747:Q5TEH5	NP_000292.1:NP_001161810.1
Matrisome-associated	ECM Regulators	PLG	plasminogen	9071	streptokinase	for the treatment of acute evolving transmural myocardial infarction, pulmonary embolism, deep vein thrombosis, arterial thrombosis or emolism and occlusion of arteriovenous cannulae	rs783147	300.11	Generalized anxiety disorder	0.007966	0.7736	0	0	0	NA	Novel	DKFZp779M0222	9071	A6PVI2:P00747:Q5TEH5	NP_000292.1:NP_001161810.1
Matrisome-associated	ECM Regulators	PLG	plasminogen	9071	streptokinase	for the treatment of acute evolving transmural myocardial infarction, pulmonary embolism, deep vein thrombosis, arterial thrombosis or emolism and occlusion of arteriovenous cannulae	rs783147	303.31	Gastrointestinal malfunction arising from mental factors	0.02949	1.769	0	0	0	NA	Novel	DKFZp779M0222	9071	A6PVI2:P00747:Q5TEH5	NP_000292.1:NP_001161810.1
Matrisome-associated	ECM Regulators	PLG	plasminogen	9071	streptokinase	for the treatment of acute evolving transmural myocardial infarction, pulmonary embolism, deep vein thrombosis, arterial thrombosis or emolism and occlusion of arteriovenous cannulae	rs783147	312	Conduct disorders	0.03156	1.424	0	0	0	NA	Novel	DKFZp779M0222	9071	A6PVI2:P00747:Q5TEH5	NP_000292.1:NP_001161810.1
Matrisome-associated	ECM Regulators	PLG	plasminogen	9071	streptokinase	for the treatment of acute evolving transmural myocardial infarction, pulmonary embolism, deep vein thrombosis, arterial thrombosis or emolism and occlusion of arteriovenous cannulae	rs783147	327.31	Central/nonobstroctive sleep apnea	0.04476	1.45	0	0	0	NA	Novel	DKFZp779M0222	9071	A6PVI2:P00747:Q5TEH5	NP_000292.1:NP_001161810.1
Matrisome-associated	ECM Regulators	PLG	plasminogen	9071	streptokinase	for the treatment of acute evolving transmural myocardial infarction, pulmonary embolism, deep vein thrombosis, arterial thrombosis or emolism and occlusion of arteriovenous cannulae	rs783147	327.4	Insomnia	0.03776	0.8895	0	0	0	NA	Novel	DKFZp779M0222	9071	A6PVI2:P00747:Q5TEH5	NP_000292.1:NP_001161810.1
Matrisome-associated	ECM Regulators	PLG	plasminogen	9071	streptokinase	for the treatment of acute evolving transmural myocardial infarction, pulmonary embolism, deep vein thrombosis, arterial thrombosis or emolism and occlusion of arteriovenous cannulae	rs783147	339	Other headache syndromes	0.008379	1.099	0	0	0	NA	Novel	DKFZp779M0222	9071	A6PVI2:P00747:Q5TEH5	NP_000292.1:NP_001161810.1
Matrisome-associated	ECM Regulators	PLG	plasminogen	9071	streptokinase	for the treatment of acute evolving transmural myocardial infarction, pulmonary embolism, deep vein thrombosis, arterial thrombosis or emolism and occlusion of arteriovenous cannulae	rs783147	350.5	Abnormal reflex	0.01302	2.06	0	55	0	NA	Likely	DKFZp779M0222	9071	A6PVI2:P00747:Q5TEH5	NP_000292.1:NP_001161810.1
Matrisome-associated	ECM Regulators	PLG	plasminogen	9071	streptokinase	for the treatment of acute evolving transmural myocardial infarction, pulmonary embolism, deep vein thrombosis, arterial thrombosis or emolism and occlusion of arteriovenous cannulae	rs783147	360	Disorders of the globe	0.02866	0.7331	0	0	0	NA	Novel	DKFZp779M0222	9071	A6PVI2:P00747:Q5TEH5	NP_000292.1:NP_001161810.1
Matrisome-associated	ECM Regulators	PLG	plasminogen	9071	streptokinase	for the treatment of acute evolving transmural myocardial infarction, pulmonary embolism, deep vein thrombosis, arterial thrombosis or emolism and occlusion of arteriovenous cannulae	rs783147	360.2	progressive myopia	0.002508	0.509	0	64	0	NA	Likely	DKFZp779M0222	9071	A6PVI2:P00747:Q5TEH5	NP_000292.1:NP_001161810.1
Matrisome-associated	ECM Regulators	PLG	plasminogen	9071	streptokinase	for the treatment of acute evolving transmural myocardial infarction, pulmonary embolism, deep vein thrombosis, arterial thrombosis or emolism and occlusion of arteriovenous cannulae	rs783147	362.26	Macular puckering of retina	0.04058	1.158	0	4	0	NA	Likely	DKFZp779M0222	9071	A6PVI2:P00747:Q5TEH5	NP_000292.1:NP_001161810.1
Matrisome-associated	ECM Regulators	PLG	plasminogen	9071	streptokinase	for the treatment of acute evolving transmural myocardial infarction, pulmonary embolism, deep vein thrombosis, arterial thrombosis or emolism and occlusion of arteriovenous cannulae	rs783147	366.1	Nonsenile Cataract	0.01302	0.744	0	0	0	NA	Novel	DKFZp779M0222	9071	A6PVI2:P00747:Q5TEH5	NP_000292.1:NP_001161810.1
Matrisome-associated	ECM Regulators	PLG	plasminogen	9071	streptokinase	for the treatment of acute evolving transmural myocardial infarction, pulmonary embolism, deep vein thrombosis, arterial thrombosis or emolism and occlusion of arteriovenous cannulae	rs783147	367	Disorders of refraction and accommodation	0.04751	0.9309	0	0	0	NA	Novel	DKFZp779M0222	9071	A6PVI2:P00747:Q5TEH5	NP_000292.1:NP_001161810.1
Matrisome-associated	ECM Regulators	PLG	plasminogen	9071	streptokinase	for the treatment of acute evolving transmural myocardial infarction, pulmonary embolism, deep vein thrombosis, arterial thrombosis or emolism and occlusion of arteriovenous cannulae	rs783147	367.9	Blindness and low vision	0.01465	0.7842	0	649	2	NA	Strongly supported	DKFZp779M0222	9071	A6PVI2:P00747:Q5TEH5	NP_000292.1:NP_001161810.1
Matrisome-associated	ECM Regulators	PLG	plasminogen	9071	streptokinase	for the treatment of acute evolving transmural myocardial infarction, pulmonary embolism, deep vein thrombosis, arterial thrombosis or emolism and occlusion of arteriovenous cannulae	rs783147	385	Other disorders of middle ear and mastoid	0.03163	0.7359	0	1	0	NA	Likely	DKFZp779M0222	9071	A6PVI2:P00747:Q5TEH5	NP_000292.1:NP_001161810.1
Matrisome-associated	ECM Regulators	PLG	plasminogen	9071	streptokinase	for the treatment of acute evolving transmural myocardial infarction, pulmonary embolism, deep vein thrombosis, arterial thrombosis or emolism and occlusion of arteriovenous cannulae	rs783147	411.41	Aneurysm and dissection of heart	0.03332	1.71	0	392	1	NA	Strongly supported	DKFZp779M0222	9071	A6PVI2:P00747:Q5TEH5	NP_000292.1:NP_001161810.1
Matrisome-associated	ECM Regulators	PLG	plasminogen	9071	streptokinase	for the treatment of acute evolving transmural myocardial infarction, pulmonary embolism, deep vein thrombosis, arterial thrombosis or emolism and occlusion of arteriovenous cannulae	rs783147	416	Cardiomegaly	0.02991	0.8912	0	0	0	NA	Novel	DKFZp779M0222	9071	A6PVI2:P00747:Q5TEH5	NP_000292.1:NP_001161810.1
Matrisome-associated	ECM Regulators	PLG	plasminogen	9071	streptokinase	for the treatment of acute evolving transmural myocardial infarction, pulmonary embolism, deep vein thrombosis, arterial thrombosis or emolism and occlusion of arteriovenous cannulae	rs783147	427.7	Tachycardia NOS	0.04458	0.878	0	42	0	NA	Likely	DKFZp779M0222	9071	A6PVI2:P00747:Q5TEH5	NP_000292.1:NP_001161810.1
Matrisome-associated	ECM Regulators	PLG	plasminogen	9071	streptokinase	for the treatment of acute evolving transmural myocardial infarction, pulmonary embolism, deep vein thrombosis, arterial thrombosis or emolism and occlusion of arteriovenous cannulae	rs783147	428.2	Heart failure NOS	0.02398	0.8083	0	123	1	NA	Strongly supported	DKFZp779M0222	9071	A6PVI2:P00747:Q5TEH5	NP_000292.1:NP_001161810.1
Matrisome-associated	ECM Regulators	PLG	plasminogen	9071	streptokinase	for the treatment of acute evolving transmural myocardial infarction, pulmonary embolism, deep vein thrombosis, arterial thrombosis or emolism and occlusion of arteriovenous cannulae	rs783147	429	Ill-defined descriptions and complications of heart disease	0.04698	0.9242	0	79	1	NA	Strongly supported	DKFZp779M0222	9071	A6PVI2:P00747:Q5TEH5	NP_000292.1:NP_001161810.1
Matrisome-associated	ECM Regulators	PLG	plasminogen	9071	streptokinase	for the treatment of acute evolving transmural myocardial infarction, pulmonary embolism, deep vein thrombosis, arterial thrombosis or emolism and occlusion of arteriovenous cannulae	rs783147	429.3	Symptoms involving cardiovascular system	0.01501	0.8744	0	1	0	NA	Likely	DKFZp779M0222	9071	A6PVI2:P00747:Q5TEH5	NP_000292.1:NP_001161810.1
Matrisome-associated	ECM Regulators	PLG	plasminogen	9071	streptokinase	for the treatment of acute evolving transmural myocardial infarction, pulmonary embolism, deep vein thrombosis, arterial thrombosis or emolism and occlusion of arteriovenous cannulae	rs783147	433.1	Occlusion and stenosis of precerebral arteries	0.0227	0.8983	0	217	0	NA	Likely	DKFZp779M0222	9071	A6PVI2:P00747:Q5TEH5	NP_000292.1:NP_001161810.1
Matrisome-associated	ECM Regulators	PLG	plasminogen	9071	streptokinase	for the treatment of acute evolving transmural myocardial infarction, pulmonary embolism, deep vein thrombosis, arterial thrombosis or emolism and occlusion of arteriovenous cannulae	rs783147	443.9	Peripheral arterial disease	0.0395	0.9137	0	5	0	NA	Likely	DKFZp779M0222	9071	A6PVI2:P00747:Q5TEH5	NP_000292.1:NP_001161810.1
Matrisome-associated	ECM Regulators	PLG	plasminogen	9071	streptokinase	for the treatment of acute evolving transmural myocardial infarction, pulmonary embolism, deep vein thrombosis, arterial thrombosis or emolism and occlusion of arteriovenous cannulae	rs783147	473.1	Chronic laryngitis	0.02936	1.692	0	0	0	NA	Novel	DKFZp779M0222	9071	A6PVI2:P00747:Q5TEH5	NP_000292.1:NP_001161810.1
Matrisome-associated	ECM Regulators	PLG	plasminogen	9071	streptokinase	for the treatment of acute evolving transmural myocardial infarction, pulmonary embolism, deep vein thrombosis, arterial thrombosis or emolism and occlusion of arteriovenous cannulae	rs783147	497	Bronchitis	0.03885	0.9051	0	0	0	NA	Novel	DKFZp779M0222	9071	A6PVI2:P00747:Q5TEH5	NP_000292.1:NP_001161810.1
Matrisome-associated	ECM Regulators	PLG	plasminogen	9071	streptokinase	for the treatment of acute evolving transmural myocardial infarction, pulmonary embolism, deep vein thrombosis, arterial thrombosis or emolism and occlusion of arteriovenous cannulae	rs783147	510.1	Lung involvement in conditions classified elsewhere	0.03946	1.716	0	0	0	NA	Novel	DKFZp779M0222	9071	A6PVI2:P00747:Q5TEH5	NP_000292.1:NP_001161810.1
Matrisome-associated	ECM Regulators	PLG	plasminogen	9071	streptokinase	for the treatment of acute evolving transmural myocardial infarction, pulmonary embolism, deep vein thrombosis, arterial thrombosis or emolism and occlusion of arteriovenous cannulae	rs783147	516	Abnormal sputum	0.04862	1.221	0	0	0	NA	Novel	DKFZp779M0222	9071	A6PVI2:P00747:Q5TEH5	NP_000292.1:NP_001161810.1
Matrisome-associated	ECM Regulators	PLG	plasminogen	9071	streptokinase	for the treatment of acute evolving transmural myocardial infarction, pulmonary embolism, deep vein thrombosis, arterial thrombosis or emolism and occlusion of arteriovenous cannulae	rs783147	530	Diseases of esophagus	0.02616	1.069	0	1	0	NA	Likely	DKFZp779M0222	9071	A6PVI2:P00747:Q5TEH5	NP_000292.1:NP_001161810.1
Matrisome-associated	ECM Regulators	PLG	plasminogen	9071	streptokinase	for the treatment of acute evolving transmural myocardial infarction, pulmonary embolism, deep vein thrombosis, arterial thrombosis or emolism and occlusion of arteriovenous cannulae	rs783147	530.11	GERD	0.0356	1.07	0	0	0	NA	Novel	DKFZp779M0222	9071	A6PVI2:P00747:Q5TEH5	NP_000292.1:NP_001161810.1
Matrisome-associated	ECM Regulators	PLG	plasminogen	9071	streptokinase	for the treatment of acute evolving transmural myocardial infarction, pulmonary embolism, deep vein thrombosis, arterial thrombosis or emolism and occlusion of arteriovenous cannulae	rs783147	535	Gastritis and duodenitis	0.006081	1.144	0	0	0	NA	Novel	DKFZp779M0222	9071	A6PVI2:P00747:Q5TEH5	NP_000292.1:NP_001161810.1
Matrisome-associated	ECM Regulators	PLG	plasminogen	9071	streptokinase	for the treatment of acute evolving transmural myocardial infarction, pulmonary embolism, deep vein thrombosis, arterial thrombosis or emolism and occlusion of arteriovenous cannulae	rs783147	535.8	Other specified gastritis	0.04039	1.195	0	0	0	NA	Novel	DKFZp779M0222	9071	A6PVI2:P00747:Q5TEH5	NP_000292.1:NP_001161810.1
Matrisome-associated	ECM Regulators	PLG	plasminogen	9071	streptokinase	for the treatment of acute evolving transmural myocardial infarction, pulmonary embolism, deep vein thrombosis, arterial thrombosis or emolism and occlusion of arteriovenous cannulae	rs783147	550	Abdominal hernia	0.02804	1.077	0	57	0	NA	Likely	DKFZp779M0222	9071	A6PVI2:P00747:Q5TEH5	NP_000292.1:NP_001161810.1
Matrisome-associated	ECM Regulators	PLG	plasminogen	9071	streptokinase	for the treatment of acute evolving transmural myocardial infarction, pulmonary embolism, deep vein thrombosis, arterial thrombosis or emolism and occlusion of arteriovenous cannulae	rs783147	550.4	Umbilical hernia	0.001594	1.322	0	19	0	NA	Likely	DKFZp779M0222	9071	A6PVI2:P00747:Q5TEH5	NP_000292.1:NP_001161810.1
Matrisome-associated	ECM Regulators	PLG	plasminogen	9071	streptokinase	for the treatment of acute evolving transmural myocardial infarction, pulmonary embolism, deep vein thrombosis, arterial thrombosis or emolism and occlusion of arteriovenous cannulae	rs783147	550.6	Incisional hernia	0.003328	1.326	0	0	0	NA	Novel	DKFZp779M0222	9071	A6PVI2:P00747:Q5TEH5	NP_000292.1:NP_001161810.1
Matrisome-associated	ECM Regulators	PLG	plasminogen	9071	streptokinase	for the treatment of acute evolving transmural myocardial infarction, pulmonary embolism, deep vein thrombosis, arterial thrombosis or emolism and occlusion of arteriovenous cannulae	rs783147	557	Intestinal malabsorption	0.01877	1.313	0	0	0	NA	Novel	DKFZp779M0222	9071	A6PVI2:P00747:Q5TEH5	NP_000292.1:NP_001161810.1
Matrisome-associated	ECM Regulators	PLG	plasminogen	9071	streptokinase	for the treatment of acute evolving transmural myocardial infarction, pulmonary embolism, deep vein thrombosis, arterial thrombosis or emolism and occlusion of arteriovenous cannulae	rs783147	557.1	Celiac or tropical sprue	0.01914	1.63	0	2	0	NA	Likely	DKFZp779M0222	9071	A6PVI2:P00747:Q5TEH5	NP_000292.1:NP_001161810.1
Matrisome-associated	ECM Regulators	PLG	plasminogen	9071	streptokinase	for the treatment of acute evolving transmural myocardial infarction, pulmonary embolism, deep vein thrombosis, arterial thrombosis or emolism and occlusion of arteriovenous cannulae	rs783147	557.11	Celiac disease	0.0322	1.577	0	0	0	NA	Novel	DKFZp779M0222	9071	A6PVI2:P00747:Q5TEH5	NP_000292.1:NP_001161810.1
Matrisome-associated	ECM Regulators	PLG	plasminogen	9071	streptokinase	for the treatment of acute evolving transmural myocardial infarction, pulmonary embolism, deep vein thrombosis, arterial thrombosis or emolism and occlusion of arteriovenous cannulae	rs783147	557.9	Intestinal malabsorption NOS	0.02064	1.548	0	0	0	NA	Novel	DKFZp779M0222	9071	A6PVI2:P00747:Q5TEH5	NP_000292.1:NP_001161810.1
Matrisome-associated	ECM Regulators	PLG	plasminogen	9071	streptokinase	for the treatment of acute evolving transmural myocardial infarction, pulmonary embolism, deep vein thrombosis, arterial thrombosis or emolism and occlusion of arteriovenous cannulae	rs783147	561	Symptoms involving digestive system	0.02343	1.181	0	0	0	NA	Novel	DKFZp779M0222	9071	A6PVI2:P00747:Q5TEH5	NP_000292.1:NP_001161810.1
Matrisome-associated	ECM Regulators	PLG	plasminogen	9071	streptokinase	for the treatment of acute evolving transmural myocardial infarction, pulmonary embolism, deep vein thrombosis, arterial thrombosis or emolism and occlusion of arteriovenous cannulae	rs783147	585.2	Renal failure NOS	0.03035	0.7946	0	32	0	NA	Likely	DKFZp779M0222	9071	A6PVI2:P00747:Q5TEH5	NP_000292.1:NP_001161810.1
Matrisome-associated	ECM Regulators	PLG	plasminogen	9071	streptokinase	for the treatment of acute evolving transmural myocardial infarction, pulmonary embolism, deep vein thrombosis, arterial thrombosis or emolism and occlusion of arteriovenous cannulae	rs783147	586.4	Stricture/obstruction of ureter	0.0141	0.6961	0	1	0	NA	Likely	DKFZp779M0222	9071	A6PVI2:P00747:Q5TEH5	NP_000292.1:NP_001161810.1
Matrisome-associated	ECM Regulators	PLG	plasminogen	9071	streptokinase	for the treatment of acute evolving transmural myocardial infarction, pulmonary embolism, deep vein thrombosis, arterial thrombosis or emolism and occlusion of arteriovenous cannulae	rs783147	595	Hydronephrosis	0.03584	0.79990000000000006	0	0	0	NA	Novel	DKFZp779M0222	9071	A6PVI2:P00747:Q5TEH5	NP_000292.1:NP_001161810.1
Matrisome-associated	ECM Regulators	PLG	plasminogen	9071	streptokinase	for the treatment of acute evolving transmural myocardial infarction, pulmonary embolism, deep vein thrombosis, arterial thrombosis or emolism and occlusion of arteriovenous cannulae	rs783147	596.5	Functional disorders of bladder	0.02041	1.253	0	5	0	NA	Likely	DKFZp779M0222	9071	A6PVI2:P00747:Q5TEH5	NP_000292.1:NP_001161810.1
Matrisome-associated	ECM Regulators	PLG	plasminogen	9071	streptokinase	for the treatment of acute evolving transmural myocardial infarction, pulmonary embolism, deep vein thrombosis, arterial thrombosis or emolism and occlusion of arteriovenous cannulae	rs783147	598.4	Other cells and casts in urine	0.01652	0.7195	0	0	0	NA	Novel	DKFZp779M0222	9071	A6PVI2:P00747:Q5TEH5	NP_000292.1:NP_001161810.1
Matrisome-associated	ECM Regulators	PLG	plasminogen	9071	streptokinase	for the treatment of acute evolving transmural myocardial infarction, pulmonary embolism, deep vein thrombosis, arterial thrombosis or emolism and occlusion of arteriovenous cannulae	rs783147	614.53	Cyst or abscess of Bartholin's gland	0.04431	1.659	0	4	0	NA	Likely	DKFZp779M0222	9071	A6PVI2:P00747:Q5TEH5	NP_000292.1:NP_001161810.1
Matrisome-associated	ECM Regulators	PLG	plasminogen	9071	streptokinase	for the treatment of acute evolving transmural myocardial infarction, pulmonary embolism, deep vein thrombosis, arterial thrombosis or emolism and occlusion of arteriovenous cannulae	rs783147	619.4	Noninflammatory disorders of vagina	0.02176	0.7728	0	0	0	NA	Novel	DKFZp779M0222	9071	A6PVI2:P00747:Q5TEH5	NP_000292.1:NP_001161810.1
Matrisome-associated	ECM Regulators	PLG	plasminogen	9071	streptokinase	for the treatment of acute evolving transmural myocardial infarction, pulmonary embolism, deep vein thrombosis, arterial thrombosis or emolism and occlusion of arteriovenous cannulae	rs783147	686.3	Pilonidal cyst	0.009994	0.4506	0	0	0	NA	Novel	DKFZp779M0222	9071	A6PVI2:P00747:Q5TEH5	NP_000292.1:NP_001161810.1
Matrisome-associated	ECM Regulators	PLG	plasminogen	9071	streptokinase	for the treatment of acute evolving transmural myocardial infarction, pulmonary embolism, deep vein thrombosis, arterial thrombosis or emolism and occlusion of arteriovenous cannulae	rs783147	695.6	Prurigo	0.01933	0.8033	0	0	0	NA	Novel	DKFZp779M0222	9071	A6PVI2:P00747:Q5TEH5	NP_000292.1:NP_001161810.1
Matrisome-associated	ECM Regulators	PLG	plasminogen	9071	streptokinase	for the treatment of acute evolving transmural myocardial infarction, pulmonary embolism, deep vein thrombosis, arterial thrombosis or emolism and occlusion of arteriovenous cannulae	rs783147	696	Psoriasis & related disorders	0.02901	1.182	0	660	2	NA	Strongly supported	DKFZp779M0222	9071	A6PVI2:P00747:Q5TEH5	NP_000292.1:NP_001161810.1
Matrisome-associated	ECM Regulators	PLG	plasminogen	9071	streptokinase	for the treatment of acute evolving transmural myocardial infarction, pulmonary embolism, deep vein thrombosis, arterial thrombosis or emolism and occlusion of arteriovenous cannulae	rs783147	709	Diffuse diseases of connective tissue	0.02748	1.21	0	0	0	NA	Novel	DKFZp779M0222	9071	A6PVI2:P00747:Q5TEH5	NP_000292.1:NP_001161810.1
Matrisome-associated	ECM Regulators	PLG	plasminogen	9071	streptokinase	for the treatment of acute evolving transmural myocardial infarction, pulmonary embolism, deep vein thrombosis, arterial thrombosis or emolism and occlusion of arteriovenous cannulae	rs783147	732	Osteochondropathies	0.02197	0.5637	0	0	0	NA	Novel	DKFZp779M0222	9071	A6PVI2:P00747:Q5TEH5	NP_000292.1:NP_001161810.1
Matrisome-associated	ECM Regulators	PLG	plasminogen	9071	streptokinase	for the treatment of acute evolving transmural myocardial infarction, pulmonary embolism, deep vein thrombosis, arterial thrombosis or emolism and occlusion of arteriovenous cannulae	rs783147	736.2	Acquired deformities of finger	0.03938	0.748	0	0	0	NA	Novel	DKFZp779M0222	9071	A6PVI2:P00747:Q5TEH5	NP_000292.1:NP_001161810.1
Matrisome-associated	ECM Regulators	PLG	plasminogen	9071	streptokinase	for the treatment of acute evolving transmural myocardial infarction, pulmonary embolism, deep vein thrombosis, arterial thrombosis or emolism and occlusion of arteriovenous cannulae	rs783147	736.6	Unequal leg length (acquired)	0.03822	1.338	0	0	0	NA	Novel	DKFZp779M0222	9071	A6PVI2:P00747:Q5TEH5	NP_000292.1:NP_001161810.1
Matrisome-associated	ECM Regulators	PLG	plasminogen	9071	streptokinase	for the treatment of acute evolving transmural myocardial infarction, pulmonary embolism, deep vein thrombosis, arterial thrombosis or emolism and occlusion of arteriovenous cannulae	rs783147	743.12	Behcet's syndrome	0.007743	0.6422	0	1	0	NA	Likely	DKFZp779M0222	9071	A6PVI2:P00747:Q5TEH5	NP_000292.1:NP_001161810.1
Matrisome-associated	ECM Regulators	PLG	plasminogen	9071	streptokinase	for the treatment of acute evolving transmural myocardial infarction, pulmonary embolism, deep vein thrombosis, arterial thrombosis or emolism and occlusion of arteriovenous cannulae	rs783147	801	Fracture of ankle and foot	0.029	0.8949	0	26	0	NA	Likely	DKFZp779M0222	9071	A6PVI2:P00747:Q5TEH5	NP_000292.1:NP_001161810.1
Matrisome-associated	ECM Regulators	PLG	plasminogen	9071	streptokinase	for the treatment of acute evolving transmural myocardial infarction, pulmonary embolism, deep vein thrombosis, arterial thrombosis or emolism and occlusion of arteriovenous cannulae	rs783147	855	Mechanical complication of nervous system device, implant, and graft	0.03239	1.716	0	1	0	NA	Likely	DKFZp779M0222	9071	A6PVI2:P00747:Q5TEH5	NP_000292.1:NP_001161810.1
Matrisome-associated	ECM Regulators	PLG	plasminogen	9071	streptokinase	for the treatment of acute evolving transmural myocardial infarction, pulmonary embolism, deep vein thrombosis, arterial thrombosis or emolism and occlusion of arteriovenous cannulae	rs783147	870.4	Open wound of nose and sinus	0.005933	2.074	0	18	0	NA	Likely	DKFZp779M0222	9071	A6PVI2:P00747:Q5TEH5	NP_000292.1:NP_001161810.1
Matrisome-associated	ECM Regulators	PLG	plasminogen	9071	streptokinase	for the treatment of acute evolving transmural myocardial infarction, pulmonary embolism, deep vein thrombosis, arterial thrombosis or emolism and occlusion of arteriovenous cannulae	rs783147	871.1	Open wound of hand except finger(s)	0.0363	0.8239	0	84	0	NA	Likely	DKFZp779M0222	9071	A6PVI2:P00747:Q5TEH5	NP_000292.1:NP_001161810.1
Matrisome-associated	ECM Regulators	PLG	plasminogen	9071	streptokinase	for the treatment of acute evolving transmural myocardial infarction, pulmonary embolism, deep vein thrombosis, arterial thrombosis or emolism and occlusion of arteriovenous cannulae	rs783147	941	Allergy to serum or vaccine	0.01722	1.633	0	17	0	NA	Likely	DKFZp779M0222	9071	A6PVI2:P00747:Q5TEH5	NP_000292.1:NP_001161810.1
Matrisome-associated	ECM Regulators	PLG	plasminogen	9071	tenecteplase	for treatment of myocardial infarction and lysis of intracoronary emboli	rs783147	10	Tuberculosis	0.02059	1.749	0	0	0	NA	Novel	DKFZp779M0222	9071	A6PVI2:P00747:Q5TEH5	NP_000292.1:NP_001161810.1
Matrisome-associated	ECM Regulators	PLG	plasminogen	9071	tenecteplase	for treatment of myocardial infarction and lysis of intracoronary emboli	rs783147	189.12	Malignant neoplasm of renal pelvis	0.02822	0.5091	0	0	0	NA	Novel	DKFZp779M0222	9071	A6PVI2:P00747:Q5TEH5	NP_000292.1:NP_001161810.1
Matrisome-associated	ECM Regulators	PLG	plasminogen	9071	tenecteplase	for treatment of myocardial infarction and lysis of intracoronary emboli	rs783147	218.2	Benign neoplasm of uterus	0.03749	1.387	0	0	0	NA	Novel	DKFZp779M0222	9071	A6PVI2:P00747:Q5TEH5	NP_000292.1:NP_001161810.1
Matrisome-associated	ECM Regulators	PLG	plasminogen	9071	tenecteplase	for treatment of myocardial infarction and lysis of intracoronary emboli	rs783147	227	Benign neoplasm of other endocrine glands	0.01906	0.7381	0	0	0	NA	Novel	DKFZp779M0222	9071	A6PVI2:P00747:Q5TEH5	NP_000292.1:NP_001161810.1
Matrisome-associated	ECM Regulators	PLG	plasminogen	9071	tenecteplase	for treatment of myocardial infarction and lysis of intracoronary emboli	rs783147	275.1	Iron metabolism disorder	0.02589	1.665	0	0	0	NA	Novel	DKFZp779M0222	9071	A6PVI2:P00747:Q5TEH5	NP_000292.1:NP_001161810.1
Matrisome-associated	ECM Regulators	PLG	plasminogen	9071	tenecteplase	for treatment of myocardial infarction and lysis of intracoronary emboli	rs783147	276.41	Acidosis	0.03125	0.7718	0	0	0	NA	Novel	DKFZp779M0222	9071	A6PVI2:P00747:Q5TEH5	NP_000292.1:NP_001161810.1
Matrisome-associated	ECM Regulators	PLG	plasminogen	9071	tenecteplase	for treatment of myocardial infarction and lysis of intracoronary emboli	rs783147	276.6	Fluid overload	0.04878	0.8375	0	0	0	NA	Novel	DKFZp779M0222	9071	A6PVI2:P00747:Q5TEH5	NP_000292.1:NP_001161810.1
Matrisome-associated	ECM Regulators	PLG	plasminogen	9071	tenecteplase	for treatment of myocardial infarction and lysis of intracoronary emboli	rs783147	278.3	Localized adiposity	0.03098	1.678	0	0	0	NA	Novel	DKFZp779M0222	9071	A6PVI2:P00747:Q5TEH5	NP_000292.1:NP_001161810.1
Matrisome-associated	ECM Regulators	PLG	plasminogen	9071	tenecteplase	for treatment of myocardial infarction and lysis of intracoronary emboli	rs783147	286.8	Hypercoagulable state	0.01646	1.435	0	1	0	NA	Likely	DKFZp779M0222	9071	A6PVI2:P00747:Q5TEH5	NP_000292.1:NP_001161810.1
Matrisome-associated	ECM Regulators	PLG	plasminogen	9071	tenecteplase	for treatment of myocardial infarction and lysis of intracoronary emboli	rs783147	290.12	Dementia with cerebral degenerations	0.03115	1.415	0	0	0	NA	Novel	DKFZp779M0222	9071	A6PVI2:P00747:Q5TEH5	NP_000292.1:NP_001161810.1
Matrisome-associated	ECM Regulators	PLG	plasminogen	9071	tenecteplase	for treatment of myocardial infarction and lysis of intracoronary emboli	rs783147	300.11	Generalized anxiety disorder	0.007966	0.7736	0	0	0	NA	Novel	DKFZp779M0222	9071	A6PVI2:P00747:Q5TEH5	NP_000292.1:NP_001161810.1
Matrisome-associated	ECM Regulators	PLG	plasminogen	9071	tenecteplase	for treatment of myocardial infarction and lysis of intracoronary emboli	rs783147	303.31	Gastrointestinal malfunction arising from mental factors	0.02949	1.769	0	0	0	NA	Novel	DKFZp779M0222	9071	A6PVI2:P00747:Q5TEH5	NP_000292.1:NP_001161810.1
Matrisome-associated	ECM Regulators	PLG	plasminogen	9071	tenecteplase	for treatment of myocardial infarction and lysis of intracoronary emboli	rs783147	312	Conduct disorders	0.03156	1.424	0	0	0	NA	Novel	DKFZp779M0222	9071	A6PVI2:P00747:Q5TEH5	NP_000292.1:NP_001161810.1
Matrisome-associated	ECM Regulators	PLG	plasminogen	9071	tenecteplase	for treatment of myocardial infarction and lysis of intracoronary emboli	rs783147	327.31	Central/nonobstroctive sleep apnea	0.04476	1.45	0	0	0	NA	Novel	DKFZp779M0222	9071	A6PVI2:P00747:Q5TEH5	NP_000292.1:NP_001161810.1
Matrisome-associated	ECM Regulators	PLG	plasminogen	9071	tenecteplase	for treatment of myocardial infarction and lysis of intracoronary emboli	rs783147	327.4	Insomnia	0.03776	0.8895	0	0	0	NA	Novel	DKFZp779M0222	9071	A6PVI2:P00747:Q5TEH5	NP_000292.1:NP_001161810.1
Matrisome-associated	ECM Regulators	PLG	plasminogen	9071	tenecteplase	for treatment of myocardial infarction and lysis of intracoronary emboli	rs783147	339	Other headache syndromes	0.008379	1.099	0	0	0	NA	Novel	DKFZp779M0222	9071	A6PVI2:P00747:Q5TEH5	NP_000292.1:NP_001161810.1
Matrisome-associated	ECM Regulators	PLG	plasminogen	9071	tenecteplase	for treatment of myocardial infarction and lysis of intracoronary emboli	rs783147	350.5	Abnormal reflex	0.01302	2.06	0	4	0	NA	Likely	DKFZp779M0222	9071	A6PVI2:P00747:Q5TEH5	NP_000292.1:NP_001161810.1
Matrisome-associated	ECM Regulators	PLG	plasminogen	9071	tenecteplase	for treatment of myocardial infarction and lysis of intracoronary emboli	rs783147	360	Disorders of the globe	0.02866	0.7331	0	0	0	NA	Novel	DKFZp779M0222	9071	A6PVI2:P00747:Q5TEH5	NP_000292.1:NP_001161810.1
Matrisome-associated	ECM Regulators	PLG	plasminogen	9071	tenecteplase	for treatment of myocardial infarction and lysis of intracoronary emboli	rs783147	360.2	progressive myopia	0.002508	0.509	0	1	0	NA	Likely	DKFZp779M0222	9071	A6PVI2:P00747:Q5TEH5	NP_000292.1:NP_001161810.1
Matrisome-associated	ECM Regulators	PLG	plasminogen	9071	tenecteplase	for treatment of myocardial infarction and lysis of intracoronary emboli	rs783147	362.26	Macular puckering of retina	0.04058	1.158	0	2	0	NA	Likely	DKFZp779M0222	9071	A6PVI2:P00747:Q5TEH5	NP_000292.1:NP_001161810.1
Matrisome-associated	ECM Regulators	PLG	plasminogen	9071	tenecteplase	for treatment of myocardial infarction and lysis of intracoronary emboli	rs783147	366.1	Nonsenile Cataract	0.01302	0.744	0	0	0	NA	Novel	DKFZp779M0222	9071	A6PVI2:P00747:Q5TEH5	NP_000292.1:NP_001161810.1
Matrisome-associated	ECM Regulators	PLG	plasminogen	9071	tenecteplase	for treatment of myocardial infarction and lysis of intracoronary emboli	rs783147	367	Disorders of refraction and accommodation	0.04751	0.9309	0	0	0	NA	Novel	DKFZp779M0222	9071	A6PVI2:P00747:Q5TEH5	NP_000292.1:NP_001161810.1
Matrisome-associated	ECM Regulators	PLG	plasminogen	9071	tenecteplase	for treatment of myocardial infarction and lysis of intracoronary emboli	rs783147	367.9	Blindness and low vision	0.01465	0.7842	0	43	2	NA	Strongly supported	DKFZp779M0222	9071	A6PVI2:P00747:Q5TEH5	NP_000292.1:NP_001161810.1
Matrisome-associated	ECM Regulators	PLG	plasminogen	9071	tenecteplase	for treatment of myocardial infarction and lysis of intracoronary emboli	rs783147	385	Other disorders of middle ear and mastoid	0.03163	0.7359	0	0	0	NA	Novel	DKFZp779M0222	9071	A6PVI2:P00747:Q5TEH5	NP_000292.1:NP_001161810.1
Matrisome-associated	ECM Regulators	PLG	plasminogen	9071	tenecteplase	for treatment of myocardial infarction and lysis of intracoronary emboli	rs783147	411.41	Aneurysm and dissection of heart	0.03332	1.71	0	32	3	NA	Strongly supported	DKFZp779M0222	9071	A6PVI2:P00747:Q5TEH5	NP_000292.1:NP_001161810.1
Matrisome-associated	ECM Regulators	PLG	plasminogen	9071	tenecteplase	for treatment of myocardial infarction and lysis of intracoronary emboli	rs783147	416	Cardiomegaly	0.02991	0.8912	0	0	0	NA	Novel	DKFZp779M0222	9071	A6PVI2:P00747:Q5TEH5	NP_000292.1:NP_001161810.1
Matrisome-associated	ECM Regulators	PLG	plasminogen	9071	tenecteplase	for treatment of myocardial infarction and lysis of intracoronary emboli	rs783147	427.7	Tachycardia NOS	0.04458	0.878	0	4	0	NA	Likely	DKFZp779M0222	9071	A6PVI2:P00747:Q5TEH5	NP_000292.1:NP_001161810.1
Matrisome-associated	ECM Regulators	PLG	plasminogen	9071	tenecteplase	for treatment of myocardial infarction and lysis of intracoronary emboli	rs783147	428.2	Heart failure NOS	0.02398	0.8083	0	14	1	NA	Strongly supported	DKFZp779M0222	9071	A6PVI2:P00747:Q5TEH5	NP_000292.1:NP_001161810.1
Matrisome-associated	ECM Regulators	PLG	plasminogen	9071	tenecteplase	for treatment of myocardial infarction and lysis of intracoronary emboli	rs783147	429	Ill-defined descriptions and complications of heart disease	0.04698	0.9242	0	5	2	NA	Strongly supported	DKFZp779M0222	9071	A6PVI2:P00747:Q5TEH5	NP_000292.1:NP_001161810.1
Matrisome-associated	ECM Regulators	PLG	plasminogen	9071	tenecteplase	for treatment of myocardial infarction and lysis of intracoronary emboli	rs783147	429.3	Symptoms involving cardiovascular system	0.01501	0.8744	0	0	0	NA	Novel	DKFZp779M0222	9071	A6PVI2:P00747:Q5TEH5	NP_000292.1:NP_001161810.1
Matrisome-associated	ECM Regulators	PLG	plasminogen	9071	tenecteplase	for treatment of myocardial infarction and lysis of intracoronary emboli	rs783147	433.1	Occlusion and stenosis of precerebral arteries	0.0227	0.8983	0	4	0	NA	Likely	DKFZp779M0222	9071	A6PVI2:P00747:Q5TEH5	NP_000292.1:NP_001161810.1
Matrisome-associated	ECM Regulators	PLG	plasminogen	9071	tenecteplase	for treatment of myocardial infarction and lysis of intracoronary emboli	rs783147	443.9	Peripheral arterial disease	0.0395	0.9137	0	1	0	NA	Likely	DKFZp779M0222	9071	A6PVI2:P00747:Q5TEH5	NP_000292.1:NP_001161810.1
Matrisome-associated	ECM Regulators	PLG	plasminogen	9071	tenecteplase	for treatment of myocardial infarction and lysis of intracoronary emboli	rs783147	473.1	Chronic laryngitis	0.02936	1.692	0	0	0	NA	Novel	DKFZp779M0222	9071	A6PVI2:P00747:Q5TEH5	NP_000292.1:NP_001161810.1
Matrisome-associated	ECM Regulators	PLG	plasminogen	9071	tenecteplase	for treatment of myocardial infarction and lysis of intracoronary emboli	rs783147	497	Bronchitis	0.03885	0.9051	0	0	0	NA	Novel	DKFZp779M0222	9071	A6PVI2:P00747:Q5TEH5	NP_000292.1:NP_001161810.1
Matrisome-associated	ECM Regulators	PLG	plasminogen	9071	tenecteplase	for treatment of myocardial infarction and lysis of intracoronary emboli	rs783147	510.1	Lung involvement in conditions classified elsewhere	0.03946	1.716	0	0	0	NA	Novel	DKFZp779M0222	9071	A6PVI2:P00747:Q5TEH5	NP_000292.1:NP_001161810.1
Matrisome-associated	ECM Regulators	PLG	plasminogen	9071	tenecteplase	for treatment of myocardial infarction and lysis of intracoronary emboli	rs783147	516	Abnormal sputum	0.04862	1.221	0	0	0	NA	Novel	DKFZp779M0222	9071	A6PVI2:P00747:Q5TEH5	NP_000292.1:NP_001161810.1
Matrisome-associated	ECM Regulators	PLG	plasminogen	9071	tenecteplase	for treatment of myocardial infarction and lysis of intracoronary emboli	rs783147	530	Diseases of esophagus	0.02616	1.069	0	0	0	NA	Novel	DKFZp779M0222	9071	A6PVI2:P00747:Q5TEH5	NP_000292.1:NP_001161810.1
Matrisome-associated	ECM Regulators	PLG	plasminogen	9071	tenecteplase	for treatment of myocardial infarction and lysis of intracoronary emboli	rs783147	530.11	GERD	0.0356	1.07	0	0	0	NA	Novel	DKFZp779M0222	9071	A6PVI2:P00747:Q5TEH5	NP_000292.1:NP_001161810.1
Matrisome-associated	ECM Regulators	PLG	plasminogen	9071	tenecteplase	for treatment of myocardial infarction and lysis of intracoronary emboli	rs783147	535	Gastritis and duodenitis	0.006081	1.144	0	0	0	NA	Novel	DKFZp779M0222	9071	A6PVI2:P00747:Q5TEH5	NP_000292.1:NP_001161810.1
Matrisome-associated	ECM Regulators	PLG	plasminogen	9071	tenecteplase	for treatment of myocardial infarction and lysis of intracoronary emboli	rs783147	535.8	Other specified gastritis	0.04039	1.195	0	0	0	NA	Novel	DKFZp779M0222	9071	A6PVI2:P00747:Q5TEH5	NP_000292.1:NP_001161810.1
Matrisome-associated	ECM Regulators	PLG	plasminogen	9071	tenecteplase	for treatment of myocardial infarction and lysis of intracoronary emboli	rs783147	550	Abdominal hernia	0.02804	1.077	0	3	0	NA	Likely	DKFZp779M0222	9071	A6PVI2:P00747:Q5TEH5	NP_000292.1:NP_001161810.1
Matrisome-associated	ECM Regulators	PLG	plasminogen	9071	tenecteplase	for treatment of myocardial infarction and lysis of intracoronary emboli	rs783147	550.4	Umbilical hernia	0.001594	1.322	0	0	0	NA	Novel	DKFZp779M0222	9071	A6PVI2:P00747:Q5TEH5	NP_000292.1:NP_001161810.1
Matrisome-associated	ECM Regulators	PLG	plasminogen	9071	tenecteplase	for treatment of myocardial infarction and lysis of intracoronary emboli	rs783147	550.6	Incisional hernia	0.003328	1.326	0	0	0	NA	Novel	DKFZp779M0222	9071	A6PVI2:P00747:Q5TEH5	NP_000292.1:NP_001161810.1
Matrisome-associated	ECM Regulators	PLG	plasminogen	9071	tenecteplase	for treatment of myocardial infarction and lysis of intracoronary emboli	rs783147	557	Intestinal malabsorption	0.01877	1.313	0	0	0	NA	Novel	DKFZp779M0222	9071	A6PVI2:P00747:Q5TEH5	NP_000292.1:NP_001161810.1
Matrisome-associated	ECM Regulators	PLG	plasminogen	9071	tenecteplase	for treatment of myocardial infarction and lysis of intracoronary emboli	rs783147	557.1	Celiac or tropical sprue	0.01914	1.63	0	0	0	NA	Novel	DKFZp779M0222	9071	A6PVI2:P00747:Q5TEH5	NP_000292.1:NP_001161810.1
Matrisome-associated	ECM Regulators	PLG	plasminogen	9071	tenecteplase	for treatment of myocardial infarction and lysis of intracoronary emboli	rs783147	557.11	Celiac disease	0.0322	1.577	0	0	0	NA	Novel	DKFZp779M0222	9071	A6PVI2:P00747:Q5TEH5	NP_000292.1:NP_001161810.1
Matrisome-associated	ECM Regulators	PLG	plasminogen	9071	tenecteplase	for treatment of myocardial infarction and lysis of intracoronary emboli	rs783147	557.9	Intestinal malabsorption NOS	0.02064	1.548	0	0	0	NA	Novel	DKFZp779M0222	9071	A6PVI2:P00747:Q5TEH5	NP_000292.1:NP_001161810.1
Matrisome-associated	ECM Regulators	PLG	plasminogen	9071	tenecteplase	for treatment of myocardial infarction and lysis of intracoronary emboli	rs783147	561	Symptoms involving digestive system	0.02343	1.181	0	0	0	NA	Novel	DKFZp779M0222	9071	A6PVI2:P00747:Q5TEH5	NP_000292.1:NP_001161810.1
Matrisome-associated	ECM Regulators	PLG	plasminogen	9071	tenecteplase	for treatment of myocardial infarction and lysis of intracoronary emboli	rs783147	585.2	Renal failure NOS	0.03035	0.7946	0	1	0	NA	Likely	DKFZp779M0222	9071	A6PVI2:P00747:Q5TEH5	NP_000292.1:NP_001161810.1
Matrisome-associated	ECM Regulators	PLG	plasminogen	9071	tenecteplase	for treatment of myocardial infarction and lysis of intracoronary emboli	rs783147	586.4	Stricture/obstruction of ureter	0.0141	0.6961	0	0	0	NA	Novel	DKFZp779M0222	9071	A6PVI2:P00747:Q5TEH5	NP_000292.1:NP_001161810.1
Matrisome-associated	ECM Regulators	PLG	plasminogen	9071	tenecteplase	for treatment of myocardial infarction and lysis of intracoronary emboli	rs783147	595	Hydronephrosis	0.03584	0.79990000000000006	0	0	0	NA	Novel	DKFZp779M0222	9071	A6PVI2:P00747:Q5TEH5	NP_000292.1:NP_001161810.1
Matrisome-associated	ECM Regulators	PLG	plasminogen	9071	tenecteplase	for treatment of myocardial infarction and lysis of intracoronary emboli	rs783147	596.5	Functional disorders of bladder	0.02041	1.253	0	0	0	NA	Novel	DKFZp779M0222	9071	A6PVI2:P00747:Q5TEH5	NP_000292.1:NP_001161810.1
Matrisome-associated	ECM Regulators	PLG	plasminogen	9071	tenecteplase	for treatment of myocardial infarction and lysis of intracoronary emboli	rs783147	598.4	Other cells and casts in urine	0.01652	0.7195	0	0	0	NA	Novel	DKFZp779M0222	9071	A6PVI2:P00747:Q5TEH5	NP_000292.1:NP_001161810.1
Matrisome-associated	ECM Regulators	PLG	plasminogen	9071	tenecteplase	for treatment of myocardial infarction and lysis of intracoronary emboli	rs783147	614.53	Cyst or abscess of Bartholin's gland	0.04431	1.659	0	0	0	NA	Novel	DKFZp779M0222	9071	A6PVI2:P00747:Q5TEH5	NP_000292.1:NP_001161810.1
Matrisome-associated	ECM Regulators	PLG	plasminogen	9071	tenecteplase	for treatment of myocardial infarction and lysis of intracoronary emboli	rs783147	619.4	Noninflammatory disorders of vagina	0.02176	0.7728	0	0	0	NA	Novel	DKFZp779M0222	9071	A6PVI2:P00747:Q5TEH5	NP_000292.1:NP_001161810.1
Matrisome-associated	ECM Regulators	PLG	plasminogen	9071	tenecteplase	for treatment of myocardial infarction and lysis of intracoronary emboli	rs783147	686.3	Pilonidal cyst	0.009994	0.4506	0	0	0	NA	Novel	DKFZp779M0222	9071	A6PVI2:P00747:Q5TEH5	NP_000292.1:NP_001161810.1
Matrisome-associated	ECM Regulators	PLG	plasminogen	9071	tenecteplase	for treatment of myocardial infarction and lysis of intracoronary emboli	rs783147	695.6	Prurigo	0.01933	0.8033	0	0	0	NA	Novel	DKFZp779M0222	9071	A6PVI2:P00747:Q5TEH5	NP_000292.1:NP_001161810.1
Matrisome-associated	ECM Regulators	PLG	plasminogen	9071	tenecteplase	for treatment of myocardial infarction and lysis of intracoronary emboli	rs783147	696	Psoriasis & related disorders	0.02901	1.182	0	35	0	NA	Likely	DKFZp779M0222	9071	A6PVI2:P00747:Q5TEH5	NP_000292.1:NP_001161810.1
Matrisome-associated	ECM Regulators	PLG	plasminogen	9071	tenecteplase	for treatment of myocardial infarction and lysis of intracoronary emboli	rs783147	709	Diffuse diseases of connective tissue	0.02748	1.21	0	0	0	NA	Novel	DKFZp779M0222	9071	A6PVI2:P00747:Q5TEH5	NP_000292.1:NP_001161810.1
Matrisome-associated	ECM Regulators	PLG	plasminogen	9071	tenecteplase	for treatment of myocardial infarction and lysis of intracoronary emboli	rs783147	732	Osteochondropathies	0.02197	0.5637	0	0	0	NA	Novel	DKFZp779M0222	9071	A6PVI2:P00747:Q5TEH5	NP_000292.1:NP_001161810.1
Matrisome-associated	ECM Regulators	PLG	plasminogen	9071	tenecteplase	for treatment of myocardial infarction and lysis of intracoronary emboli	rs783147	736.2	Acquired deformities of finger	0.03938	0.748	0	0	0	NA	Novel	DKFZp779M0222	9071	A6PVI2:P00747:Q5TEH5	NP_000292.1:NP_001161810.1
Matrisome-associated	ECM Regulators	PLG	plasminogen	9071	tenecteplase	for treatment of myocardial infarction and lysis of intracoronary emboli	rs783147	736.6	Unequal leg length (acquired)	0.03822	1.338	0	0	0	NA	Novel	DKFZp779M0222	9071	A6PVI2:P00747:Q5TEH5	NP_000292.1:NP_001161810.1
Matrisome-associated	ECM Regulators	PLG	plasminogen	9071	tenecteplase	for treatment of myocardial infarction and lysis of intracoronary emboli	rs783147	743.12	Behcet's syndrome	0.007743	0.6422	0	0	0	NA	Novel	DKFZp779M0222	9071	A6PVI2:P00747:Q5TEH5	NP_000292.1:NP_001161810.1
Matrisome-associated	ECM Regulators	PLG	plasminogen	9071	tenecteplase	for treatment of myocardial infarction and lysis of intracoronary emboli	rs783147	801	Fracture of ankle and foot	0.029	0.8949	0	2	0	NA	Likely	DKFZp779M0222	9071	A6PVI2:P00747:Q5TEH5	NP_000292.1:NP_001161810.1
Matrisome-associated	ECM Regulators	PLG	plasminogen	9071	tenecteplase	for treatment of myocardial infarction and lysis of intracoronary emboli	rs783147	855	Mechanical complication of nervous system device, implant, and graft	0.03239	1.716	0	0	0	NA	Novel	DKFZp779M0222	9071	A6PVI2:P00747:Q5TEH5	NP_000292.1:NP_001161810.1
Matrisome-associated	ECM Regulators	PLG	plasminogen	9071	tenecteplase	for treatment of myocardial infarction and lysis of intracoronary emboli	rs783147	870.4	Open wound of nose and sinus	0.005933	2.074	0	3	0	NA	Likely	DKFZp779M0222	9071	A6PVI2:P00747:Q5TEH5	NP_000292.1:NP_001161810.1
Matrisome-associated	ECM Regulators	PLG	plasminogen	9071	tenecteplase	for treatment of myocardial infarction and lysis of intracoronary emboli	rs783147	871.1	Open wound of hand except finger(s)	0.0363	0.8239	0	1	0	NA	Likely	DKFZp779M0222	9071	A6PVI2:P00747:Q5TEH5	NP_000292.1:NP_001161810.1
Matrisome-associated	ECM Regulators	PLG	plasminogen	9071	tenecteplase	for treatment of myocardial infarction and lysis of intracoronary emboli	rs783147	941	Allergy to serum or vaccine	0.01722	1.633	0	2	0	NA	Likely	DKFZp779M0222	9071	A6PVI2:P00747:Q5TEH5	NP_000292.1:NP_001161810.1
Matrisome-associated	ECM Regulators	PLG	plasminogen	9071	tranexamic acid	for use in patients with hemophilia for short term use (two to eight days) to reduce or prevent hemorrhage and reduce the need for replacement therapy during and following tooth extraction. it can also be used for excessive bleeding in menstruation, surgery, or trauma cases.	rs783147	10	Tuberculosis	0.02059	1.749	0	1	0	NA	Likely	DKFZp779M0222	9071	A6PVI2:P00747:Q5TEH5	NP_000292.1:NP_001161810.1
Matrisome-associated	ECM Regulators	PLG	plasminogen	9071	tranexamic acid	for use in patients with hemophilia for short term use (two to eight days) to reduce or prevent hemorrhage and reduce the need for replacement therapy during and following tooth extraction. it can also be used for excessive bleeding in menstruation, surgery, or trauma cases.	rs783147	189.12	Malignant neoplasm of renal pelvis	0.02822	0.5091	0	1	0	NA	Likely	DKFZp779M0222	9071	A6PVI2:P00747:Q5TEH5	NP_000292.1:NP_001161810.1
Matrisome-associated	ECM Regulators	PLG	plasminogen	9071	tranexamic acid	for use in patients with hemophilia for short term use (two to eight days) to reduce or prevent hemorrhage and reduce the need for replacement therapy during and following tooth extraction. it can also be used for excessive bleeding in menstruation, surgery, or trauma cases.	rs783147	218.2	Benign neoplasm of uterus	0.03749	1.387	0	13	1	NA	Strongly supported	DKFZp779M0222	9071	A6PVI2:P00747:Q5TEH5	NP_000292.1:NP_001161810.1
Matrisome-associated	ECM Regulators	PLG	plasminogen	9071	tranexamic acid	for use in patients with hemophilia for short term use (two to eight days) to reduce or prevent hemorrhage and reduce the need for replacement therapy during and following tooth extraction. it can also be used for excessive bleeding in menstruation, surgery, or trauma cases.	rs783147	227	Benign neoplasm of other endocrine glands	0.01906	0.7381	0	0	0	NA	Novel	DKFZp779M0222	9071	A6PVI2:P00747:Q5TEH5	NP_000292.1:NP_001161810.1
Matrisome-associated	ECM Regulators	PLG	plasminogen	9071	tranexamic acid	for use in patients with hemophilia for short term use (two to eight days) to reduce or prevent hemorrhage and reduce the need for replacement therapy during and following tooth extraction. it can also be used for excessive bleeding in menstruation, surgery, or trauma cases.	rs783147	275.1	Iron metabolism disorder	0.02589	1.665	0	0	0	NA	Novel	DKFZp779M0222	9071	A6PVI2:P00747:Q5TEH5	NP_000292.1:NP_001161810.1
Matrisome-associated	ECM Regulators	PLG	plasminogen	9071	tranexamic acid	for use in patients with hemophilia for short term use (two to eight days) to reduce or prevent hemorrhage and reduce the need for replacement therapy during and following tooth extraction. it can also be used for excessive bleeding in menstruation, surgery, or trauma cases.	rs783147	276.41	Acidosis	0.03125	0.7718	0	0	0	NA	Novel	DKFZp779M0222	9071	A6PVI2:P00747:Q5TEH5	NP_000292.1:NP_001161810.1
Matrisome-associated	ECM Regulators	PLG	plasminogen	9071	tranexamic acid	for use in patients with hemophilia for short term use (two to eight days) to reduce or prevent hemorrhage and reduce the need for replacement therapy during and following tooth extraction. it can also be used for excessive bleeding in menstruation, surgery, or trauma cases.	rs783147	276.6	Fluid overload	0.04878	0.8375	0	0	0	NA	Novel	DKFZp779M0222	9071	A6PVI2:P00747:Q5TEH5	NP_000292.1:NP_001161810.1
Matrisome-associated	ECM Regulators	PLG	plasminogen	9071	tranexamic acid	for use in patients with hemophilia for short term use (two to eight days) to reduce or prevent hemorrhage and reduce the need for replacement therapy during and following tooth extraction. it can also be used for excessive bleeding in menstruation, surgery, or trauma cases.	rs783147	278.3	Localized adiposity	0.03098	1.678	0	0	0	NA	Novel	DKFZp779M0222	9071	A6PVI2:P00747:Q5TEH5	NP_000292.1:NP_001161810.1
Matrisome-associated	ECM Regulators	PLG	plasminogen	9071	tranexamic acid	for use in patients with hemophilia for short term use (two to eight days) to reduce or prevent hemorrhage and reduce the need for replacement therapy during and following tooth extraction. it can also be used for excessive bleeding in menstruation, surgery, or trauma cases.	rs783147	286.8	Hypercoagulable state	0.01646	1.435	0	10	0	NA	Likely	DKFZp779M0222	9071	A6PVI2:P00747:Q5TEH5	NP_000292.1:NP_001161810.1
Matrisome-associated	ECM Regulators	PLG	plasminogen	9071	tranexamic acid	for use in patients with hemophilia for short term use (two to eight days) to reduce or prevent hemorrhage and reduce the need for replacement therapy during and following tooth extraction. it can also be used for excessive bleeding in menstruation, surgery, or trauma cases.	rs783147	290.12	Dementia with cerebral degenerations	0.03115	1.415	0	0	0	NA	Novel	DKFZp779M0222	9071	A6PVI2:P00747:Q5TEH5	NP_000292.1:NP_001161810.1
Matrisome-associated	ECM Regulators	PLG	plasminogen	9071	tranexamic acid	for use in patients with hemophilia for short term use (two to eight days) to reduce or prevent hemorrhage and reduce the need for replacement therapy during and following tooth extraction. it can also be used for excessive bleeding in menstruation, surgery, or trauma cases.	rs783147	300.11	Generalized anxiety disorder	0.007966	0.7736	0	0	0	NA	Novel	DKFZp779M0222	9071	A6PVI2:P00747:Q5TEH5	NP_000292.1:NP_001161810.1
Matrisome-associated	ECM Regulators	PLG	plasminogen	9071	tranexamic acid	for use in patients with hemophilia for short term use (two to eight days) to reduce or prevent hemorrhage and reduce the need for replacement therapy during and following tooth extraction. it can also be used for excessive bleeding in menstruation, surgery, or trauma cases.	rs783147	303.31	Gastrointestinal malfunction arising from mental factors	0.02949	1.769	0	0	0	NA	Novel	DKFZp779M0222	9071	A6PVI2:P00747:Q5TEH5	NP_000292.1:NP_001161810.1
Matrisome-associated	ECM Regulators	PLG	plasminogen	9071	tranexamic acid	for use in patients with hemophilia for short term use (two to eight days) to reduce or prevent hemorrhage and reduce the need for replacement therapy during and following tooth extraction. it can also be used for excessive bleeding in menstruation, surgery, or trauma cases.	rs783147	312	Conduct disorders	0.03156	1.424	0	0	0	NA	Novel	DKFZp779M0222	9071	A6PVI2:P00747:Q5TEH5	NP_000292.1:NP_001161810.1
Matrisome-associated	ECM Regulators	PLG	plasminogen	9071	tranexamic acid	for use in patients with hemophilia for short term use (two to eight days) to reduce or prevent hemorrhage and reduce the need for replacement therapy during and following tooth extraction. it can also be used for excessive bleeding in menstruation, surgery, or trauma cases.	rs783147	327.31	Central/nonobstroctive sleep apnea	0.04476	1.45	0	0	0	NA	Novel	DKFZp779M0222	9071	A6PVI2:P00747:Q5TEH5	NP_000292.1:NP_001161810.1
Matrisome-associated	ECM Regulators	PLG	plasminogen	9071	tranexamic acid	for use in patients with hemophilia for short term use (two to eight days) to reduce or prevent hemorrhage and reduce the need for replacement therapy during and following tooth extraction. it can also be used for excessive bleeding in menstruation, surgery, or trauma cases.	rs783147	327.4	Insomnia	0.03776	0.8895	0	0	0	NA	Novel	DKFZp779M0222	9071	A6PVI2:P00747:Q5TEH5	NP_000292.1:NP_001161810.1
Matrisome-associated	ECM Regulators	PLG	plasminogen	9071	tranexamic acid	for use in patients with hemophilia for short term use (two to eight days) to reduce or prevent hemorrhage and reduce the need for replacement therapy during and following tooth extraction. it can also be used for excessive bleeding in menstruation, surgery, or trauma cases.	rs783147	339	Other headache syndromes	0.008379	1.099	0	0	0	NA	Novel	DKFZp779M0222	9071	A6PVI2:P00747:Q5TEH5	NP_000292.1:NP_001161810.1
Matrisome-associated	ECM Regulators	PLG	plasminogen	9071	tranexamic acid	for use in patients with hemophilia for short term use (two to eight days) to reduce or prevent hemorrhage and reduce the need for replacement therapy during and following tooth extraction. it can also be used for excessive bleeding in menstruation, surgery, or trauma cases.	rs783147	350.5	Abnormal reflex	0.01302	2.06	0	56	0	NA	Likely	DKFZp779M0222	9071	A6PVI2:P00747:Q5TEH5	NP_000292.1:NP_001161810.1
Matrisome-associated	ECM Regulators	PLG	plasminogen	9071	tranexamic acid	for use in patients with hemophilia for short term use (two to eight days) to reduce or prevent hemorrhage and reduce the need for replacement therapy during and following tooth extraction. it can also be used for excessive bleeding in menstruation, surgery, or trauma cases.	rs783147	360	Disorders of the globe	0.02866	0.7331	0	4	0	NA	Likely	DKFZp779M0222	9071	A6PVI2:P00747:Q5TEH5	NP_000292.1:NP_001161810.1
Matrisome-associated	ECM Regulators	PLG	plasminogen	9071	tranexamic acid	for use in patients with hemophilia for short term use (two to eight days) to reduce or prevent hemorrhage and reduce the need for replacement therapy during and following tooth extraction. it can also be used for excessive bleeding in menstruation, surgery, or trauma cases.	rs783147	360.2	progressive myopia	0.002508	0.509	0	11	1	NA	Strongly supported	DKFZp779M0222	9071	A6PVI2:P00747:Q5TEH5	NP_000292.1:NP_001161810.1
Matrisome-associated	ECM Regulators	PLG	plasminogen	9071	tranexamic acid	for use in patients with hemophilia for short term use (two to eight days) to reduce or prevent hemorrhage and reduce the need for replacement therapy during and following tooth extraction. it can also be used for excessive bleeding in menstruation, surgery, or trauma cases.	rs783147	362.26	Macular puckering of retina	0.04058	1.158	0	1	0	NA	Likely	DKFZp779M0222	9071	A6PVI2:P00747:Q5TEH5	NP_000292.1:NP_001161810.1
Matrisome-associated	ECM Regulators	PLG	plasminogen	9071	tranexamic acid	for use in patients with hemophilia for short term use (two to eight days) to reduce or prevent hemorrhage and reduce the need for replacement therapy during and following tooth extraction. it can also be used for excessive bleeding in menstruation, surgery, or trauma cases.	rs783147	366.1	Nonsenile Cataract	0.01302	0.744	0	0	0	NA	Novel	DKFZp779M0222	9071	A6PVI2:P00747:Q5TEH5	NP_000292.1:NP_001161810.1
Matrisome-associated	ECM Regulators	PLG	plasminogen	9071	tranexamic acid	for use in patients with hemophilia for short term use (two to eight days) to reduce or prevent hemorrhage and reduce the need for replacement therapy during and following tooth extraction. it can also be used for excessive bleeding in menstruation, surgery, or trauma cases.	rs783147	367	Disorders of refraction and accommodation	0.04751	0.9309	0	0	0	NA	Novel	DKFZp779M0222	9071	A6PVI2:P00747:Q5TEH5	NP_000292.1:NP_001161810.1
Matrisome-associated	ECM Regulators	PLG	plasminogen	9071	tranexamic acid	for use in patients with hemophilia for short term use (two to eight days) to reduce or prevent hemorrhage and reduce the need for replacement therapy during and following tooth extraction. it can also be used for excessive bleeding in menstruation, surgery, or trauma cases.	rs783147	367.9	Blindness and low vision	0.01465	0.7842	0	231	7	NA	Strongly supported	DKFZp779M0222	9071	A6PVI2:P00747:Q5TEH5	NP_000292.1:NP_001161810.1
Matrisome-associated	ECM Regulators	PLG	plasminogen	9071	tranexamic acid	for use in patients with hemophilia for short term use (two to eight days) to reduce or prevent hemorrhage and reduce the need for replacement therapy during and following tooth extraction. it can also be used for excessive bleeding in menstruation, surgery, or trauma cases.	rs783147	385	Other disorders of middle ear and mastoid	0.03163	0.7359	0	0	0	NA	Novel	DKFZp779M0222	9071	A6PVI2:P00747:Q5TEH5	NP_000292.1:NP_001161810.1
Matrisome-associated	ECM Regulators	PLG	plasminogen	9071	tranexamic acid	for use in patients with hemophilia for short term use (two to eight days) to reduce or prevent hemorrhage and reduce the need for replacement therapy during and following tooth extraction. it can also be used for excessive bleeding in menstruation, surgery, or trauma cases.	rs783147	411.41	Aneurysm and dissection of heart	0.03332	1.71	0	119	3	NA	Strongly supported	DKFZp779M0222	9071	A6PVI2:P00747:Q5TEH5	NP_000292.1:NP_001161810.1
Matrisome-associated	ECM Regulators	PLG	plasminogen	9071	tranexamic acid	for use in patients with hemophilia for short term use (two to eight days) to reduce or prevent hemorrhage and reduce the need for replacement therapy during and following tooth extraction. it can also be used for excessive bleeding in menstruation, surgery, or trauma cases.	rs783147	416	Cardiomegaly	0.02991	0.8912	0	0	0	NA	Novel	DKFZp779M0222	9071	A6PVI2:P00747:Q5TEH5	NP_000292.1:NP_001161810.1
Matrisome-associated	ECM Regulators	PLG	plasminogen	9071	tranexamic acid	for use in patients with hemophilia for short term use (two to eight days) to reduce or prevent hemorrhage and reduce the need for replacement therapy during and following tooth extraction. it can also be used for excessive bleeding in menstruation, surgery, or trauma cases.	rs783147	427.7	Tachycardia NOS	0.04458	0.878	0	6	0	NA	Likely	DKFZp779M0222	9071	A6PVI2:P00747:Q5TEH5	NP_000292.1:NP_001161810.1
Matrisome-associated	ECM Regulators	PLG	plasminogen	9071	tranexamic acid	for use in patients with hemophilia for short term use (two to eight days) to reduce or prevent hemorrhage and reduce the need for replacement therapy during and following tooth extraction. it can also be used for excessive bleeding in menstruation, surgery, or trauma cases.	rs783147	428.2	Heart failure NOS	0.02398	0.8083	0	2	0	NA	Likely	DKFZp779M0222	9071	A6PVI2:P00747:Q5TEH5	NP_000292.1:NP_001161810.1
Matrisome-associated	ECM Regulators	PLG	plasminogen	9071	tranexamic acid	for use in patients with hemophilia for short term use (two to eight days) to reduce or prevent hemorrhage and reduce the need for replacement therapy during and following tooth extraction. it can also be used for excessive bleeding in menstruation, surgery, or trauma cases.	rs783147	429	Ill-defined descriptions and complications of heart disease	0.04698	0.9242	0	19	1	NA	Strongly supported	DKFZp779M0222	9071	A6PVI2:P00747:Q5TEH5	NP_000292.1:NP_001161810.1
Matrisome-associated	ECM Regulators	PLG	plasminogen	9071	tranexamic acid	for use in patients with hemophilia for short term use (two to eight days) to reduce or prevent hemorrhage and reduce the need for replacement therapy during and following tooth extraction. it can also be used for excessive bleeding in menstruation, surgery, or trauma cases.	rs783147	429.3	Symptoms involving cardiovascular system	0.01501	0.8744	0	0	0	NA	Novel	DKFZp779M0222	9071	A6PVI2:P00747:Q5TEH5	NP_000292.1:NP_001161810.1
Matrisome-associated	ECM Regulators	PLG	plasminogen	9071	tranexamic acid	for use in patients with hemophilia for short term use (two to eight days) to reduce or prevent hemorrhage and reduce the need for replacement therapy during and following tooth extraction. it can also be used for excessive bleeding in menstruation, surgery, or trauma cases.	rs783147	433.1	Occlusion and stenosis of precerebral arteries	0.0227	0.8983	0	11	0	NA	Likely	DKFZp779M0222	9071	A6PVI2:P00747:Q5TEH5	NP_000292.1:NP_001161810.1
Matrisome-associated	ECM Regulators	PLG	plasminogen	9071	tranexamic acid	for use in patients with hemophilia for short term use (two to eight days) to reduce or prevent hemorrhage and reduce the need for replacement therapy during and following tooth extraction. it can also be used for excessive bleeding in menstruation, surgery, or trauma cases.	rs783147	443.9	Peripheral arterial disease	0.0395	0.9137	0	3	0	NA	Likely	DKFZp779M0222	9071	A6PVI2:P00747:Q5TEH5	NP_000292.1:NP_001161810.1
Matrisome-associated	ECM Regulators	PLG	plasminogen	9071	tranexamic acid	for use in patients with hemophilia for short term use (two to eight days) to reduce or prevent hemorrhage and reduce the need for replacement therapy during and following tooth extraction. it can also be used for excessive bleeding in menstruation, surgery, or trauma cases.	rs783147	473.1	Chronic laryngitis	0.02936	1.692	0	0	0	NA	Novel	DKFZp779M0222	9071	A6PVI2:P00747:Q5TEH5	NP_000292.1:NP_001161810.1
Matrisome-associated	ECM Regulators	PLG	plasminogen	9071	tranexamic acid	for use in patients with hemophilia for short term use (two to eight days) to reduce or prevent hemorrhage and reduce the need for replacement therapy during and following tooth extraction. it can also be used for excessive bleeding in menstruation, surgery, or trauma cases.	rs783147	497	Bronchitis	0.03885	0.9051	0	0	0	NA	Novel	DKFZp779M0222	9071	A6PVI2:P00747:Q5TEH5	NP_000292.1:NP_001161810.1
Matrisome-associated	ECM Regulators	PLG	plasminogen	9071	tranexamic acid	for use in patients with hemophilia for short term use (two to eight days) to reduce or prevent hemorrhage and reduce the need for replacement therapy during and following tooth extraction. it can also be used for excessive bleeding in menstruation, surgery, or trauma cases.	rs783147	510.1	Lung involvement in conditions classified elsewhere	0.03946	1.716	0	1	0	NA	Likely	DKFZp779M0222	9071	A6PVI2:P00747:Q5TEH5	NP_000292.1:NP_001161810.1
Matrisome-associated	ECM Regulators	PLG	plasminogen	9071	tranexamic acid	for use in patients with hemophilia for short term use (two to eight days) to reduce or prevent hemorrhage and reduce the need for replacement therapy during and following tooth extraction. it can also be used for excessive bleeding in menstruation, surgery, or trauma cases.	rs783147	516	Abnormal sputum	0.04862	1.221	0	0	0	NA	Novel	DKFZp779M0222	9071	A6PVI2:P00747:Q5TEH5	NP_000292.1:NP_001161810.1
Matrisome-associated	ECM Regulators	PLG	plasminogen	9071	tranexamic acid	for use in patients with hemophilia for short term use (two to eight days) to reduce or prevent hemorrhage and reduce the need for replacement therapy during and following tooth extraction. it can also be used for excessive bleeding in menstruation, surgery, or trauma cases.	rs783147	530	Diseases of esophagus	0.02616	1.069	0	0	0	NA	Novel	DKFZp779M0222	9071	A6PVI2:P00747:Q5TEH5	NP_000292.1:NP_001161810.1
Matrisome-associated	ECM Regulators	PLG	plasminogen	9071	tranexamic acid	for use in patients with hemophilia for short term use (two to eight days) to reduce or prevent hemorrhage and reduce the need for replacement therapy during and following tooth extraction. it can also be used for excessive bleeding in menstruation, surgery, or trauma cases.	rs783147	530.11	GERD	0.0356	1.07	0	0	0	NA	Novel	DKFZp779M0222	9071	A6PVI2:P00747:Q5TEH5	NP_000292.1:NP_001161810.1
Matrisome-associated	ECM Regulators	PLG	plasminogen	9071	tranexamic acid	for use in patients with hemophilia for short term use (two to eight days) to reduce or prevent hemorrhage and reduce the need for replacement therapy during and following tooth extraction. it can also be used for excessive bleeding in menstruation, surgery, or trauma cases.	rs783147	535	Gastritis and duodenitis	0.006081	1.144	0	2	0	NA	Likely	DKFZp779M0222	9071	A6PVI2:P00747:Q5TEH5	NP_000292.1:NP_001161810.1
Matrisome-associated	ECM Regulators	PLG	plasminogen	9071	tranexamic acid	for use in patients with hemophilia for short term use (two to eight days) to reduce or prevent hemorrhage and reduce the need for replacement therapy during and following tooth extraction. it can also be used for excessive bleeding in menstruation, surgery, or trauma cases.	rs783147	535.8	Other specified gastritis	0.04039	1.195	0	2	0	NA	Likely	DKFZp779M0222	9071	A6PVI2:P00747:Q5TEH5	NP_000292.1:NP_001161810.1
Matrisome-associated	ECM Regulators	PLG	plasminogen	9071	tranexamic acid	for use in patients with hemophilia for short term use (two to eight days) to reduce or prevent hemorrhage and reduce the need for replacement therapy during and following tooth extraction. it can also be used for excessive bleeding in menstruation, surgery, or trauma cases.	rs783147	550	Abdominal hernia	0.02804	1.077	0	51	1	NA	Strongly supported	DKFZp779M0222	9071	A6PVI2:P00747:Q5TEH5	NP_000292.1:NP_001161810.1
Matrisome-associated	ECM Regulators	PLG	plasminogen	9071	tranexamic acid	for use in patients with hemophilia for short term use (two to eight days) to reduce or prevent hemorrhage and reduce the need for replacement therapy during and following tooth extraction. it can also be used for excessive bleeding in menstruation, surgery, or trauma cases.	rs783147	550.4	Umbilical hernia	0.001594	1.322	0	8	1	NA	Strongly supported	DKFZp779M0222	9071	A6PVI2:P00747:Q5TEH5	NP_000292.1:NP_001161810.1
Matrisome-associated	ECM Regulators	PLG	plasminogen	9071	tranexamic acid	for use in patients with hemophilia for short term use (two to eight days) to reduce or prevent hemorrhage and reduce the need for replacement therapy during and following tooth extraction. it can also be used for excessive bleeding in menstruation, surgery, or trauma cases.	rs783147	550.6	Incisional hernia	0.003328	1.326	0	0	0	NA	Novel	DKFZp779M0222	9071	A6PVI2:P00747:Q5TEH5	NP_000292.1:NP_001161810.1
Matrisome-associated	ECM Regulators	PLG	plasminogen	9071	tranexamic acid	for use in patients with hemophilia for short term use (two to eight days) to reduce or prevent hemorrhage and reduce the need for replacement therapy during and following tooth extraction. it can also be used for excessive bleeding in menstruation, surgery, or trauma cases.	rs783147	557	Intestinal malabsorption	0.01877	1.313	0	0	0	NA	Novel	DKFZp779M0222	9071	A6PVI2:P00747:Q5TEH5	NP_000292.1:NP_001161810.1
Matrisome-associated	ECM Regulators	PLG	plasminogen	9071	tranexamic acid	for use in patients with hemophilia for short term use (two to eight days) to reduce or prevent hemorrhage and reduce the need for replacement therapy during and following tooth extraction. it can also be used for excessive bleeding in menstruation, surgery, or trauma cases.	rs783147	557.1	Celiac or tropical sprue	0.01914	1.63	0	1	0	NA	Likely	DKFZp779M0222	9071	A6PVI2:P00747:Q5TEH5	NP_000292.1:NP_001161810.1
Matrisome-associated	ECM Regulators	PLG	plasminogen	9071	tranexamic acid	for use in patients with hemophilia for short term use (two to eight days) to reduce or prevent hemorrhage and reduce the need for replacement therapy during and following tooth extraction. it can also be used for excessive bleeding in menstruation, surgery, or trauma cases.	rs783147	557.11	Celiac disease	0.0322	1.577	0	1	0	NA	Likely	DKFZp779M0222	9071	A6PVI2:P00747:Q5TEH5	NP_000292.1:NP_001161810.1
Matrisome-associated	ECM Regulators	PLG	plasminogen	9071	tranexamic acid	for use in patients with hemophilia for short term use (two to eight days) to reduce or prevent hemorrhage and reduce the need for replacement therapy during and following tooth extraction. it can also be used for excessive bleeding in menstruation, surgery, or trauma cases.	rs783147	557.9	Intestinal malabsorption NOS	0.02064	1.548	0	0	0	NA	Novel	DKFZp779M0222	9071	A6PVI2:P00747:Q5TEH5	NP_000292.1:NP_001161810.1
Matrisome-associated	ECM Regulators	PLG	plasminogen	9071	tranexamic acid	for use in patients with hemophilia for short term use (two to eight days) to reduce or prevent hemorrhage and reduce the need for replacement therapy during and following tooth extraction. it can also be used for excessive bleeding in menstruation, surgery, or trauma cases.	rs783147	561	Symptoms involving digestive system	0.02343	1.181	0	0	0	NA	Novel	DKFZp779M0222	9071	A6PVI2:P00747:Q5TEH5	NP_000292.1:NP_001161810.1
Matrisome-associated	ECM Regulators	PLG	plasminogen	9071	tranexamic acid	for use in patients with hemophilia for short term use (two to eight days) to reduce or prevent hemorrhage and reduce the need for replacement therapy during and following tooth extraction. it can also be used for excessive bleeding in menstruation, surgery, or trauma cases.	rs783147	585.2	Renal failure NOS	0.03035	0.7946	0	56	1	NA	Strongly supported	DKFZp779M0222	9071	A6PVI2:P00747:Q5TEH5	NP_000292.1:NP_001161810.1
Matrisome-associated	ECM Regulators	PLG	plasminogen	9071	tranexamic acid	for use in patients with hemophilia for short term use (two to eight days) to reduce or prevent hemorrhage and reduce the need for replacement therapy during and following tooth extraction. it can also be used for excessive bleeding in menstruation, surgery, or trauma cases.	rs783147	586.4	Stricture/obstruction of ureter	0.0141	0.6961	0	1	0	NA	Likely	DKFZp779M0222	9071	A6PVI2:P00747:Q5TEH5	NP_000292.1:NP_001161810.1
Matrisome-associated	ECM Regulators	PLG	plasminogen	9071	tranexamic acid	for use in patients with hemophilia for short term use (two to eight days) to reduce or prevent hemorrhage and reduce the need for replacement therapy during and following tooth extraction. it can also be used for excessive bleeding in menstruation, surgery, or trauma cases.	rs783147	595	Hydronephrosis	0.03584	0.79990000000000006	0	0	0	NA	Novel	DKFZp779M0222	9071	A6PVI2:P00747:Q5TEH5	NP_000292.1:NP_001161810.1
Matrisome-associated	ECM Regulators	PLG	plasminogen	9071	tranexamic acid	for use in patients with hemophilia for short term use (two to eight days) to reduce or prevent hemorrhage and reduce the need for replacement therapy during and following tooth extraction. it can also be used for excessive bleeding in menstruation, surgery, or trauma cases.	rs783147	596.5	Functional disorders of bladder	0.02041	1.253	0	1	1	NA	Strongly supported	DKFZp779M0222	9071	A6PVI2:P00747:Q5TEH5	NP_000292.1:NP_001161810.1
Matrisome-associated	ECM Regulators	PLG	plasminogen	9071	tranexamic acid	for use in patients with hemophilia for short term use (two to eight days) to reduce or prevent hemorrhage and reduce the need for replacement therapy during and following tooth extraction. it can also be used for excessive bleeding in menstruation, surgery, or trauma cases.	rs783147	598.4	Other cells and casts in urine	0.01652	0.7195	0	0	0	NA	Novel	DKFZp779M0222	9071	A6PVI2:P00747:Q5TEH5	NP_000292.1:NP_001161810.1
Matrisome-associated	ECM Regulators	PLG	plasminogen	9071	tranexamic acid	for use in patients with hemophilia for short term use (two to eight days) to reduce or prevent hemorrhage and reduce the need for replacement therapy during and following tooth extraction. it can also be used for excessive bleeding in menstruation, surgery, or trauma cases.	rs783147	614.53	Cyst or abscess of Bartholin's gland	0.04431	1.659	0	9	0	NA	Likely	DKFZp779M0222	9071	A6PVI2:P00747:Q5TEH5	NP_000292.1:NP_001161810.1
Matrisome-associated	ECM Regulators	PLG	plasminogen	9071	tranexamic acid	for use in patients with hemophilia for short term use (two to eight days) to reduce or prevent hemorrhage and reduce the need for replacement therapy during and following tooth extraction. it can also be used for excessive bleeding in menstruation, surgery, or trauma cases.	rs783147	619.4	Noninflammatory disorders of vagina	0.02176	0.7728	0	1	0	NA	Likely	DKFZp779M0222	9071	A6PVI2:P00747:Q5TEH5	NP_000292.1:NP_001161810.1
Matrisome-associated	ECM Regulators	PLG	plasminogen	9071	tranexamic acid	for use in patients with hemophilia for short term use (two to eight days) to reduce or prevent hemorrhage and reduce the need for replacement therapy during and following tooth extraction. it can also be used for excessive bleeding in menstruation, surgery, or trauma cases.	rs783147	686.3	Pilonidal cyst	0.009994	0.4506	0	0	0	NA	Novel	DKFZp779M0222	9071	A6PVI2:P00747:Q5TEH5	NP_000292.1:NP_001161810.1
Matrisome-associated	ECM Regulators	PLG	plasminogen	9071	tranexamic acid	for use in patients with hemophilia for short term use (two to eight days) to reduce or prevent hemorrhage and reduce the need for replacement therapy during and following tooth extraction. it can also be used for excessive bleeding in menstruation, surgery, or trauma cases.	rs783147	695.6	Prurigo	0.01933	0.8033	0	1	0	NA	Likely	DKFZp779M0222	9071	A6PVI2:P00747:Q5TEH5	NP_000292.1:NP_001161810.1
Matrisome-associated	ECM Regulators	PLG	plasminogen	9071	tranexamic acid	for use in patients with hemophilia for short term use (two to eight days) to reduce or prevent hemorrhage and reduce the need for replacement therapy during and following tooth extraction. it can also be used for excessive bleeding in menstruation, surgery, or trauma cases.	rs783147	696	Psoriasis & related disorders	0.02901	1.182	0	168	6	NA	Strongly supported	DKFZp779M0222	9071	A6PVI2:P00747:Q5TEH5	NP_000292.1:NP_001161810.1
Matrisome-associated	ECM Regulators	PLG	plasminogen	9071	tranexamic acid	for use in patients with hemophilia for short term use (two to eight days) to reduce or prevent hemorrhage and reduce the need for replacement therapy during and following tooth extraction. it can also be used for excessive bleeding in menstruation, surgery, or trauma cases.	rs783147	709	Diffuse diseases of connective tissue	0.02748	1.21	0	0	0	NA	Novel	DKFZp779M0222	9071	A6PVI2:P00747:Q5TEH5	NP_000292.1:NP_001161810.1
Matrisome-associated	ECM Regulators	PLG	plasminogen	9071	tranexamic acid	for use in patients with hemophilia for short term use (two to eight days) to reduce or prevent hemorrhage and reduce the need for replacement therapy during and following tooth extraction. it can also be used for excessive bleeding in menstruation, surgery, or trauma cases.	rs783147	732	Osteochondropathies	0.02197	0.5637	0	0	0	NA	Novel	DKFZp779M0222	9071	A6PVI2:P00747:Q5TEH5	NP_000292.1:NP_001161810.1
Matrisome-associated	ECM Regulators	PLG	plasminogen	9071	tranexamic acid	for use in patients with hemophilia for short term use (two to eight days) to reduce or prevent hemorrhage and reduce the need for replacement therapy during and following tooth extraction. it can also be used for excessive bleeding in menstruation, surgery, or trauma cases.	rs783147	736.2	Acquired deformities of finger	0.03938	0.748	0	0	0	NA	Novel	DKFZp779M0222	9071	A6PVI2:P00747:Q5TEH5	NP_000292.1:NP_001161810.1
Matrisome-associated	ECM Regulators	PLG	plasminogen	9071	tranexamic acid	for use in patients with hemophilia for short term use (two to eight days) to reduce or prevent hemorrhage and reduce the need for replacement therapy during and following tooth extraction. it can also be used for excessive bleeding in menstruation, surgery, or trauma cases.	rs783147	736.6	Unequal leg length (acquired)	0.03822	1.338	0	0	0	NA	Novel	DKFZp779M0222	9071	A6PVI2:P00747:Q5TEH5	NP_000292.1:NP_001161810.1
Matrisome-associated	ECM Regulators	PLG	plasminogen	9071	tranexamic acid	for use in patients with hemophilia for short term use (two to eight days) to reduce or prevent hemorrhage and reduce the need for replacement therapy during and following tooth extraction. it can also be used for excessive bleeding in menstruation, surgery, or trauma cases.	rs783147	743.12	Behcet's syndrome	0.007743	0.6422	0	0	0	NA	Novel	DKFZp779M0222	9071	A6PVI2:P00747:Q5TEH5	NP_000292.1:NP_001161810.1
Matrisome-associated	ECM Regulators	PLG	plasminogen	9071	tranexamic acid	for use in patients with hemophilia for short term use (two to eight days) to reduce or prevent hemorrhage and reduce the need for replacement therapy during and following tooth extraction. it can also be used for excessive bleeding in menstruation, surgery, or trauma cases.	rs783147	801	Fracture of ankle and foot	0.029	0.8949	0	2	7	NA	Strongly supported	DKFZp779M0222	9071	A6PVI2:P00747:Q5TEH5	NP_000292.1:NP_001161810.1
Matrisome-associated	ECM Regulators	PLG	plasminogen	9071	tranexamic acid	for use in patients with hemophilia for short term use (two to eight days) to reduce or prevent hemorrhage and reduce the need for replacement therapy during and following tooth extraction. it can also be used for excessive bleeding in menstruation, surgery, or trauma cases.	rs783147	855	Mechanical complication of nervous system device, implant, and graft	0.03239	1.716	0	5	0	NA	Likely	DKFZp779M0222	9071	A6PVI2:P00747:Q5TEH5	NP_000292.1:NP_001161810.1
Matrisome-associated	ECM Regulators	PLG	plasminogen	9071	tranexamic acid	for use in patients with hemophilia for short term use (two to eight days) to reduce or prevent hemorrhage and reduce the need for replacement therapy during and following tooth extraction. it can also be used for excessive bleeding in menstruation, surgery, or trauma cases.	rs783147	870.4	Open wound of nose and sinus	0.005933	2.074	0	9	3	NA	Strongly supported	DKFZp779M0222	9071	A6PVI2:P00747:Q5TEH5	NP_000292.1:NP_001161810.1
Matrisome-associated	ECM Regulators	PLG	plasminogen	9071	tranexamic acid	for use in patients with hemophilia for short term use (two to eight days) to reduce or prevent hemorrhage and reduce the need for replacement therapy during and following tooth extraction. it can also be used for excessive bleeding in menstruation, surgery, or trauma cases.	rs783147	871.1	Open wound of hand except finger(s)	0.0363	0.8239	0	26	0	NA	Likely	DKFZp779M0222	9071	A6PVI2:P00747:Q5TEH5	NP_000292.1:NP_001161810.1
Matrisome-associated	ECM Regulators	PLG	plasminogen	9071	tranexamic acid	for use in patients with hemophilia for short term use (two to eight days) to reduce or prevent hemorrhage and reduce the need for replacement therapy during and following tooth extraction. it can also be used for excessive bleeding in menstruation, surgery, or trauma cases.	rs783147	941	Allergy to serum or vaccine	0.01722	1.633	0	5	0	NA	Likely	DKFZp779M0222	9071	A6PVI2:P00747:Q5TEH5	NP_000292.1:NP_001161810.1
Matrisome-associated	ECM Regulators	PLG	plasminogen	9071	urokinase	urokinase can be used for the treatment of pulminary embolism, coronary artery thrombosis, iv catheter clearance, and venous and arterial blood clots.	rs783147	10	Tuberculosis	0.02059	1.749	0	26	0	NA	Likely	DKFZp779M0222	9071	A6PVI2:P00747:Q5TEH5	NP_000292.1:NP_001161810.1
Matrisome-associated	ECM Regulators	PLG	plasminogen	9071	urokinase	urokinase can be used for the treatment of pulminary embolism, coronary artery thrombosis, iv catheter clearance, and venous and arterial blood clots.	rs783147	189.12	Malignant neoplasm of renal pelvis	0.02822	0.5091	0	9	0	NA	Likely	DKFZp779M0222	9071	A6PVI2:P00747:Q5TEH5	NP_000292.1:NP_001161810.1
Matrisome-associated	ECM Regulators	PLG	plasminogen	9071	urokinase	urokinase can be used for the treatment of pulminary embolism, coronary artery thrombosis, iv catheter clearance, and venous and arterial blood clots.	rs783147	218.2	Benign neoplasm of uterus	0.03749	1.387	0	43	0	NA	Likely	DKFZp779M0222	9071	A6PVI2:P00747:Q5TEH5	NP_000292.1:NP_001161810.1
Matrisome-associated	ECM Regulators	PLG	plasminogen	9071	urokinase	urokinase can be used for the treatment of pulminary embolism, coronary artery thrombosis, iv catheter clearance, and venous and arterial blood clots.	rs783147	227	Benign neoplasm of other endocrine glands	0.01906	0.7381	0	2	0	NA	Likely	DKFZp779M0222	9071	A6PVI2:P00747:Q5TEH5	NP_000292.1:NP_001161810.1
Matrisome-associated	ECM Regulators	PLG	plasminogen	9071	urokinase	urokinase can be used for the treatment of pulminary embolism, coronary artery thrombosis, iv catheter clearance, and venous and arterial blood clots.	rs783147	275.1	Iron metabolism disorder	0.02589	1.665	0	0	0	NA	Novel	DKFZp779M0222	9071	A6PVI2:P00747:Q5TEH5	NP_000292.1:NP_001161810.1
Matrisome-associated	ECM Regulators	PLG	plasminogen	9071	urokinase	urokinase can be used for the treatment of pulminary embolism, coronary artery thrombosis, iv catheter clearance, and venous and arterial blood clots.	rs783147	276.41	Acidosis	0.03125	0.7718	0	0	0	NA	Novel	DKFZp779M0222	9071	A6PVI2:P00747:Q5TEH5	NP_000292.1:NP_001161810.1
Matrisome-associated	ECM Regulators	PLG	plasminogen	9071	urokinase	urokinase can be used for the treatment of pulminary embolism, coronary artery thrombosis, iv catheter clearance, and venous and arterial blood clots.	rs783147	276.6	Fluid overload	0.04878	0.8375	0	0	0	NA	Novel	DKFZp779M0222	9071	A6PVI2:P00747:Q5TEH5	NP_000292.1:NP_001161810.1
Matrisome-associated	ECM Regulators	PLG	plasminogen	9071	urokinase	urokinase can be used for the treatment of pulminary embolism, coronary artery thrombosis, iv catheter clearance, and venous and arterial blood clots.	rs783147	278.3	Localized adiposity	0.03098	1.678	0	0	0	NA	Novel	DKFZp779M0222	9071	A6PVI2:P00747:Q5TEH5	NP_000292.1:NP_001161810.1
Matrisome-associated	ECM Regulators	PLG	plasminogen	9071	urokinase	urokinase can be used for the treatment of pulminary embolism, coronary artery thrombosis, iv catheter clearance, and venous and arterial blood clots.	rs783147	286.8	Hypercoagulable state	0.01646	1.435	0	19	0	NA	Likely	DKFZp779M0222	9071	A6PVI2:P00747:Q5TEH5	NP_000292.1:NP_001161810.1
Matrisome-associated	ECM Regulators	PLG	plasminogen	9071	urokinase	urokinase can be used for the treatment of pulminary embolism, coronary artery thrombosis, iv catheter clearance, and venous and arterial blood clots.	rs783147	290.12	Dementia with cerebral degenerations	0.03115	1.415	0	14	0	NA	Likely	DKFZp779M0222	9071	A6PVI2:P00747:Q5TEH5	NP_000292.1:NP_001161810.1
Matrisome-associated	ECM Regulators	PLG	plasminogen	9071	urokinase	urokinase can be used for the treatment of pulminary embolism, coronary artery thrombosis, iv catheter clearance, and venous and arterial blood clots.	rs783147	300.11	Generalized anxiety disorder	0.007966	0.7736	0	0	0	NA	Novel	DKFZp779M0222	9071	A6PVI2:P00747:Q5TEH5	NP_000292.1:NP_001161810.1
Matrisome-associated	ECM Regulators	PLG	plasminogen	9071	urokinase	urokinase can be used for the treatment of pulminary embolism, coronary artery thrombosis, iv catheter clearance, and venous and arterial blood clots.	rs783147	303.31	Gastrointestinal malfunction arising from mental factors	0.02949	1.769	0	0	0	NA	Novel	DKFZp779M0222	9071	A6PVI2:P00747:Q5TEH5	NP_000292.1:NP_001161810.1
Matrisome-associated	ECM Regulators	PLG	plasminogen	9071	urokinase	urokinase can be used for the treatment of pulminary embolism, coronary artery thrombosis, iv catheter clearance, and venous and arterial blood clots.	rs783147	312	Conduct disorders	0.03156	1.424	0	0	0	NA	Novel	DKFZp779M0222	9071	A6PVI2:P00747:Q5TEH5	NP_000292.1:NP_001161810.1
Matrisome-associated	ECM Regulators	PLG	plasminogen	9071	urokinase	urokinase can be used for the treatment of pulminary embolism, coronary artery thrombosis, iv catheter clearance, and venous and arterial blood clots.	rs783147	327.31	Central/nonobstroctive sleep apnea	0.04476	1.45	0	0	0	NA	Novel	DKFZp779M0222	9071	A6PVI2:P00747:Q5TEH5	NP_000292.1:NP_001161810.1
Matrisome-associated	ECM Regulators	PLG	plasminogen	9071	urokinase	urokinase can be used for the treatment of pulminary embolism, coronary artery thrombosis, iv catheter clearance, and venous and arterial blood clots.	rs783147	327.4	Insomnia	0.03776	0.8895	0	1	0	NA	Likely	DKFZp779M0222	9071	A6PVI2:P00747:Q5TEH5	NP_000292.1:NP_001161810.1
Matrisome-associated	ECM Regulators	PLG	plasminogen	9071	urokinase	urokinase can be used for the treatment of pulminary embolism, coronary artery thrombosis, iv catheter clearance, and venous and arterial blood clots.	rs783147	339	Other headache syndromes	0.008379	1.099	0	0	0	NA	Novel	DKFZp779M0222	9071	A6PVI2:P00747:Q5TEH5	NP_000292.1:NP_001161810.1
Matrisome-associated	ECM Regulators	PLG	plasminogen	9071	urokinase	urokinase can be used for the treatment of pulminary embolism, coronary artery thrombosis, iv catheter clearance, and venous and arterial blood clots.	rs783147	350.5	Abnormal reflex	0.01302	2.06	0	142	1	NA	Strongly supported	DKFZp779M0222	9071	A6PVI2:P00747:Q5TEH5	NP_000292.1:NP_001161810.1
Matrisome-associated	ECM Regulators	PLG	plasminogen	9071	urokinase	urokinase can be used for the treatment of pulminary embolism, coronary artery thrombosis, iv catheter clearance, and venous and arterial blood clots.	rs783147	360	Disorders of the globe	0.02866	0.7331	0	3	0	NA	Likely	DKFZp779M0222	9071	A6PVI2:P00747:Q5TEH5	NP_000292.1:NP_001161810.1
Matrisome-associated	ECM Regulators	PLG	plasminogen	9071	urokinase	urokinase can be used for the treatment of pulminary embolism, coronary artery thrombosis, iv catheter clearance, and venous and arterial blood clots.	rs783147	360.2	progressive myopia	0.002508	0.509	0	156	0	NA	Likely	DKFZp779M0222	9071	A6PVI2:P00747:Q5TEH5	NP_000292.1:NP_001161810.1
Matrisome-associated	ECM Regulators	PLG	plasminogen	9071	urokinase	urokinase can be used for the treatment of pulminary embolism, coronary artery thrombosis, iv catheter clearance, and venous and arterial blood clots.	rs783147	362.26	Macular puckering of retina	0.04058	1.158	0	34	0	NA	Likely	DKFZp779M0222	9071	A6PVI2:P00747:Q5TEH5	NP_000292.1:NP_001161810.1
Matrisome-associated	ECM Regulators	PLG	plasminogen	9071	urokinase	urokinase can be used for the treatment of pulminary embolism, coronary artery thrombosis, iv catheter clearance, and venous and arterial blood clots.	rs783147	366.1	Nonsenile Cataract	0.01302	0.744	0	0	0	NA	Novel	DKFZp779M0222	9071	A6PVI2:P00747:Q5TEH5	NP_000292.1:NP_001161810.1
Matrisome-associated	ECM Regulators	PLG	plasminogen	9071	urokinase	urokinase can be used for the treatment of pulminary embolism, coronary artery thrombosis, iv catheter clearance, and venous and arterial blood clots.	rs783147	367	Disorders of refraction and accommodation	0.04751	0.9309	0	0	0	NA	Novel	DKFZp779M0222	9071	A6PVI2:P00747:Q5TEH5	NP_000292.1:NP_001161810.1
Matrisome-associated	ECM Regulators	PLG	plasminogen	9071	urokinase	urokinase can be used for the treatment of pulminary embolism, coronary artery thrombosis, iv catheter clearance, and venous and arterial blood clots.	rs783147	367.9	Blindness and low vision	0.01465	0.7842	0	1820	5	NA	Strongly supported	DKFZp779M0222	9071	A6PVI2:P00747:Q5TEH5	NP_000292.1:NP_001161810.1
Matrisome-associated	ECM Regulators	PLG	plasminogen	9071	urokinase	urokinase can be used for the treatment of pulminary embolism, coronary artery thrombosis, iv catheter clearance, and venous and arterial blood clots.	rs783147	385	Other disorders of middle ear and mastoid	0.03163	0.7359	0	1	0	NA	Likely	DKFZp779M0222	9071	A6PVI2:P00747:Q5TEH5	NP_000292.1:NP_001161810.1
Matrisome-associated	ECM Regulators	PLG	plasminogen	9071	urokinase	urokinase can be used for the treatment of pulminary embolism, coronary artery thrombosis, iv catheter clearance, and venous and arterial blood clots.	rs783147	411.41	Aneurysm and dissection of heart	0.03332	1.71	0	330	1	NA	Strongly supported	DKFZp779M0222	9071	A6PVI2:P00747:Q5TEH5	NP_000292.1:NP_001161810.1
Matrisome-associated	ECM Regulators	PLG	plasminogen	9071	urokinase	urokinase can be used for the treatment of pulminary embolism, coronary artery thrombosis, iv catheter clearance, and venous and arterial blood clots.	rs783147	416	Cardiomegaly	0.02991	0.8912	0	1	0	NA	Likely	DKFZp779M0222	9071	A6PVI2:P00747:Q5TEH5	NP_000292.1:NP_001161810.1
Matrisome-associated	ECM Regulators	PLG	plasminogen	9071	urokinase	urokinase can be used for the treatment of pulminary embolism, coronary artery thrombosis, iv catheter clearance, and venous and arterial blood clots.	rs783147	427.7	Tachycardia NOS	0.04458	0.878	0	12	0	NA	Likely	DKFZp779M0222	9071	A6PVI2:P00747:Q5TEH5	NP_000292.1:NP_001161810.1
Matrisome-associated	ECM Regulators	PLG	plasminogen	9071	urokinase	urokinase can be used for the treatment of pulminary embolism, coronary artery thrombosis, iv catheter clearance, and venous and arterial blood clots.	rs783147	428.2	Heart failure NOS	0.02398	0.8083	0	62	0	NA	Likely	DKFZp779M0222	9071	A6PVI2:P00747:Q5TEH5	NP_000292.1:NP_001161810.1
Matrisome-associated	ECM Regulators	PLG	plasminogen	9071	urokinase	urokinase can be used for the treatment of pulminary embolism, coronary artery thrombosis, iv catheter clearance, and venous and arterial blood clots.	rs783147	429	Ill-defined descriptions and complications of heart disease	0.04698	0.9242	0	70	1	NA	Strongly supported	DKFZp779M0222	9071	A6PVI2:P00747:Q5TEH5	NP_000292.1:NP_001161810.1
Matrisome-associated	ECM Regulators	PLG	plasminogen	9071	urokinase	urokinase can be used for the treatment of pulminary embolism, coronary artery thrombosis, iv catheter clearance, and venous and arterial blood clots.	rs783147	429.3	Symptoms involving cardiovascular system	0.01501	0.8744	0	5	0	NA	Likely	DKFZp779M0222	9071	A6PVI2:P00747:Q5TEH5	NP_000292.1:NP_001161810.1
Matrisome-associated	ECM Regulators	PLG	plasminogen	9071	urokinase	urokinase can be used for the treatment of pulminary embolism, coronary artery thrombosis, iv catheter clearance, and venous and arterial blood clots.	rs783147	433.1	Occlusion and stenosis of precerebral arteries	0.0227	0.8983	0	241	0	NA	Likely	DKFZp779M0222	9071	A6PVI2:P00747:Q5TEH5	NP_000292.1:NP_001161810.1
Matrisome-associated	ECM Regulators	PLG	plasminogen	9071	urokinase	urokinase can be used for the treatment of pulminary embolism, coronary artery thrombosis, iv catheter clearance, and venous and arterial blood clots.	rs783147	443.9	Peripheral arterial disease	0.0395	0.9137	0	3	1	NA	Strongly supported	DKFZp779M0222	9071	A6PVI2:P00747:Q5TEH5	NP_000292.1:NP_001161810.1
Matrisome-associated	ECM Regulators	PLG	plasminogen	9071	urokinase	urokinase can be used for the treatment of pulminary embolism, coronary artery thrombosis, iv catheter clearance, and venous and arterial blood clots.	rs783147	473.1	Chronic laryngitis	0.02936	1.692	0	0	0	NA	Novel	DKFZp779M0222	9071	A6PVI2:P00747:Q5TEH5	NP_000292.1:NP_001161810.1
Matrisome-associated	ECM Regulators	PLG	plasminogen	9071	urokinase	urokinase can be used for the treatment of pulminary embolism, coronary artery thrombosis, iv catheter clearance, and venous and arterial blood clots.	rs783147	497	Bronchitis	0.03885	0.9051	0	5	0	NA	Likely	DKFZp779M0222	9071	A6PVI2:P00747:Q5TEH5	NP_000292.1:NP_001161810.1
Matrisome-associated	ECM Regulators	PLG	plasminogen	9071	urokinase	urokinase can be used for the treatment of pulminary embolism, coronary artery thrombosis, iv catheter clearance, and venous and arterial blood clots.	rs783147	510.1	Lung involvement in conditions classified elsewhere	0.03946	1.716	0	0	0	NA	Novel	DKFZp779M0222	9071	A6PVI2:P00747:Q5TEH5	NP_000292.1:NP_001161810.1
Matrisome-associated	ECM Regulators	PLG	plasminogen	9071	urokinase	urokinase can be used for the treatment of pulminary embolism, coronary artery thrombosis, iv catheter clearance, and venous and arterial blood clots.	rs783147	516	Abnormal sputum	0.04862	1.221	0	0	0	NA	Novel	DKFZp779M0222	9071	A6PVI2:P00747:Q5TEH5	NP_000292.1:NP_001161810.1
Matrisome-associated	ECM Regulators	PLG	plasminogen	9071	urokinase	urokinase can be used for the treatment of pulminary embolism, coronary artery thrombosis, iv catheter clearance, and venous and arterial blood clots.	rs783147	530	Diseases of esophagus	0.02616	1.069	0	5	0	NA	Likely	DKFZp779M0222	9071	A6PVI2:P00747:Q5TEH5	NP_000292.1:NP_001161810.1
Matrisome-associated	ECM Regulators	PLG	plasminogen	9071	urokinase	urokinase can be used for the treatment of pulminary embolism, coronary artery thrombosis, iv catheter clearance, and venous and arterial blood clots.	rs783147	530.11	GERD	0.0356	1.07	0	0	0	NA	Novel	DKFZp779M0222	9071	A6PVI2:P00747:Q5TEH5	NP_000292.1:NP_001161810.1
Matrisome-associated	ECM Regulators	PLG	plasminogen	9071	urokinase	urokinase can be used for the treatment of pulminary embolism, coronary artery thrombosis, iv catheter clearance, and venous and arterial blood clots.	rs783147	535	Gastritis and duodenitis	0.006081	1.144	0	9	0	NA	Likely	DKFZp779M0222	9071	A6PVI2:P00747:Q5TEH5	NP_000292.1:NP_001161810.1
Matrisome-associated	ECM Regulators	PLG	plasminogen	9071	urokinase	urokinase can be used for the treatment of pulminary embolism, coronary artery thrombosis, iv catheter clearance, and venous and arterial blood clots.	rs783147	535.8	Other specified gastritis	0.04039	1.195	0	9	0	NA	Likely	DKFZp779M0222	9071	A6PVI2:P00747:Q5TEH5	NP_000292.1:NP_001161810.1
Matrisome-associated	ECM Regulators	PLG	plasminogen	9071	urokinase	urokinase can be used for the treatment of pulminary embolism, coronary artery thrombosis, iv catheter clearance, and venous and arterial blood clots.	rs783147	550	Abdominal hernia	0.02804	1.077	0	144	0	NA	Likely	DKFZp779M0222	9071	A6PVI2:P00747:Q5TEH5	NP_000292.1:NP_001161810.1
Matrisome-associated	ECM Regulators	PLG	plasminogen	9071	urokinase	urokinase can be used for the treatment of pulminary embolism, coronary artery thrombosis, iv catheter clearance, and venous and arterial blood clots.	rs783147	550.4	Umbilical hernia	0.001594	1.322	0	224	0	NA	Likely	DKFZp779M0222	9071	A6PVI2:P00747:Q5TEH5	NP_000292.1:NP_001161810.1
Matrisome-associated	ECM Regulators	PLG	plasminogen	9071	urokinase	urokinase can be used for the treatment of pulminary embolism, coronary artery thrombosis, iv catheter clearance, and venous and arterial blood clots.	rs783147	550.6	Incisional hernia	0.003328	1.326	0	2	0	NA	Likely	DKFZp779M0222	9071	A6PVI2:P00747:Q5TEH5	NP_000292.1:NP_001161810.1
Matrisome-associated	ECM Regulators	PLG	plasminogen	9071	urokinase	urokinase can be used for the treatment of pulminary embolism, coronary artery thrombosis, iv catheter clearance, and venous and arterial blood clots.	rs783147	557	Intestinal malabsorption	0.01877	1.313	0	0	0	NA	Novel	DKFZp779M0222	9071	A6PVI2:P00747:Q5TEH5	NP_000292.1:NP_001161810.1
Matrisome-associated	ECM Regulators	PLG	plasminogen	9071	urokinase	urokinase can be used for the treatment of pulminary embolism, coronary artery thrombosis, iv catheter clearance, and venous and arterial blood clots.	rs783147	557.1	Celiac or tropical sprue	0.01914	1.63	0	1	0	NA	Likely	DKFZp779M0222	9071	A6PVI2:P00747:Q5TEH5	NP_000292.1:NP_001161810.1
Matrisome-associated	ECM Regulators	PLG	plasminogen	9071	urokinase	urokinase can be used for the treatment of pulminary embolism, coronary artery thrombosis, iv catheter clearance, and venous and arterial blood clots.	rs783147	557.11	Celiac disease	0.0322	1.577	0	1	0	NA	Likely	DKFZp779M0222	9071	A6PVI2:P00747:Q5TEH5	NP_000292.1:NP_001161810.1
Matrisome-associated	ECM Regulators	PLG	plasminogen	9071	urokinase	urokinase can be used for the treatment of pulminary embolism, coronary artery thrombosis, iv catheter clearance, and venous and arterial blood clots.	rs783147	557.9	Intestinal malabsorption NOS	0.02064	1.548	0	0	0	NA	Novel	DKFZp779M0222	9071	A6PVI2:P00747:Q5TEH5	NP_000292.1:NP_001161810.1
Matrisome-associated	ECM Regulators	PLG	plasminogen	9071	urokinase	urokinase can be used for the treatment of pulminary embolism, coronary artery thrombosis, iv catheter clearance, and venous and arterial blood clots.	rs783147	561	Symptoms involving digestive system	0.02343	1.181	0	0	0	NA	Novel	DKFZp779M0222	9071	A6PVI2:P00747:Q5TEH5	NP_000292.1:NP_001161810.1
Matrisome-associated	ECM Regulators	PLG	plasminogen	9071	urokinase	urokinase can be used for the treatment of pulminary embolism, coronary artery thrombosis, iv catheter clearance, and venous and arterial blood clots.	rs783147	585.2	Renal failure NOS	0.03035	0.7946	0	53	0	NA	Likely	DKFZp779M0222	9071	A6PVI2:P00747:Q5TEH5	NP_000292.1:NP_001161810.1
Matrisome-associated	ECM Regulators	PLG	plasminogen	9071	urokinase	urokinase can be used for the treatment of pulminary embolism, coronary artery thrombosis, iv catheter clearance, and venous and arterial blood clots.	rs783147	586.4	Stricture/obstruction of ureter	0.0141	0.6961	0	10	0	NA	Likely	DKFZp779M0222	9071	A6PVI2:P00747:Q5TEH5	NP_000292.1:NP_001161810.1
Matrisome-associated	ECM Regulators	PLG	plasminogen	9071	urokinase	urokinase can be used for the treatment of pulminary embolism, coronary artery thrombosis, iv catheter clearance, and venous and arterial blood clots.	rs783147	595	Hydronephrosis	0.03584	0.79990000000000006	0	2	0	NA	Likely	DKFZp779M0222	9071	A6PVI2:P00747:Q5TEH5	NP_000292.1:NP_001161810.1
Matrisome-associated	ECM Regulators	PLG	plasminogen	9071	urokinase	urokinase can be used for the treatment of pulminary embolism, coronary artery thrombosis, iv catheter clearance, and venous and arterial blood clots.	rs783147	596.5	Functional disorders of bladder	0.02041	1.253	0	76	0	NA	Likely	DKFZp779M0222	9071	A6PVI2:P00747:Q5TEH5	NP_000292.1:NP_001161810.1
Matrisome-associated	ECM Regulators	PLG	plasminogen	9071	urokinase	urokinase can be used for the treatment of pulminary embolism, coronary artery thrombosis, iv catheter clearance, and venous and arterial blood clots.	rs783147	598.4	Other cells and casts in urine	0.01652	0.7195	0	0	0	NA	Novel	DKFZp779M0222	9071	A6PVI2:P00747:Q5TEH5	NP_000292.1:NP_001161810.1
Matrisome-associated	ECM Regulators	PLG	plasminogen	9071	urokinase	urokinase can be used for the treatment of pulminary embolism, coronary artery thrombosis, iv catheter clearance, and venous and arterial blood clots.	rs783147	614.53	Cyst or abscess of Bartholin's gland	0.04431	1.659	0	38	0	NA	Likely	DKFZp779M0222	9071	A6PVI2:P00747:Q5TEH5	NP_000292.1:NP_001161810.1
Matrisome-associated	ECM Regulators	PLG	plasminogen	9071	urokinase	urokinase can be used for the treatment of pulminary embolism, coronary artery thrombosis, iv catheter clearance, and venous and arterial blood clots.	rs783147	619.4	Noninflammatory disorders of vagina	0.02176	0.7728	0	8	0	NA	Likely	DKFZp779M0222	9071	A6PVI2:P00747:Q5TEH5	NP_000292.1:NP_001161810.1
Matrisome-associated	ECM Regulators	PLG	plasminogen	9071	urokinase	urokinase can be used for the treatment of pulminary embolism, coronary artery thrombosis, iv catheter clearance, and venous and arterial blood clots.	rs783147	686.3	Pilonidal cyst	0.009994	0.4506	0	0	0	NA	Novel	DKFZp779M0222	9071	A6PVI2:P00747:Q5TEH5	NP_000292.1:NP_001161810.1
Matrisome-associated	ECM Regulators	PLG	plasminogen	9071	urokinase	urokinase can be used for the treatment of pulminary embolism, coronary artery thrombosis, iv catheter clearance, and venous and arterial blood clots.	rs783147	695.6	Prurigo	0.01933	0.8033	0	0	0	NA	Novel	DKFZp779M0222	9071	A6PVI2:P00747:Q5TEH5	NP_000292.1:NP_001161810.1
Matrisome-associated	ECM Regulators	PLG	plasminogen	9071	urokinase	urokinase can be used for the treatment of pulminary embolism, coronary artery thrombosis, iv catheter clearance, and venous and arterial blood clots.	rs783147	696	Psoriasis & related disorders	0.02901	1.182	0	1424	1	NA	Strongly supported	DKFZp779M0222	9071	A6PVI2:P00747:Q5TEH5	NP_000292.1:NP_001161810.1
Matrisome-associated	ECM Regulators	PLG	plasminogen	9071	urokinase	urokinase can be used for the treatment of pulminary embolism, coronary artery thrombosis, iv catheter clearance, and venous and arterial blood clots.	rs783147	709	Diffuse diseases of connective tissue	0.02748	1.21	0	0	0	NA	Novel	DKFZp779M0222	9071	A6PVI2:P00747:Q5TEH5	NP_000292.1:NP_001161810.1
Matrisome-associated	ECM Regulators	PLG	plasminogen	9071	urokinase	urokinase can be used for the treatment of pulminary embolism, coronary artery thrombosis, iv catheter clearance, and venous and arterial blood clots.	rs783147	732	Osteochondropathies	0.02197	0.5637	0	0	0	NA	Novel	DKFZp779M0222	9071	A6PVI2:P00747:Q5TEH5	NP_000292.1:NP_001161810.1
Matrisome-associated	ECM Regulators	PLG	plasminogen	9071	urokinase	urokinase can be used for the treatment of pulminary embolism, coronary artery thrombosis, iv catheter clearance, and venous and arterial blood clots.	rs783147	736.2	Acquired deformities of finger	0.03938	0.748	0	50	0	NA	Likely	DKFZp779M0222	9071	A6PVI2:P00747:Q5TEH5	NP_000292.1:NP_001161810.1
Matrisome-associated	ECM Regulators	PLG	plasminogen	9071	urokinase	urokinase can be used for the treatment of pulminary embolism, coronary artery thrombosis, iv catheter clearance, and venous and arterial blood clots.	rs783147	736.6	Unequal leg length (acquired)	0.03822	1.338	0	0	0	NA	Novel	DKFZp779M0222	9071	A6PVI2:P00747:Q5TEH5	NP_000292.1:NP_001161810.1
Matrisome-associated	ECM Regulators	PLG	plasminogen	9071	urokinase	urokinase can be used for the treatment of pulminary embolism, coronary artery thrombosis, iv catheter clearance, and venous and arterial blood clots.	rs783147	743.12	Behcet's syndrome	0.007743	0.6422	0	0	0	NA	Novel	DKFZp779M0222	9071	A6PVI2:P00747:Q5TEH5	NP_000292.1:NP_001161810.1
Matrisome-associated	ECM Regulators	PLG	plasminogen	9071	urokinase	urokinase can be used for the treatment of pulminary embolism, coronary artery thrombosis, iv catheter clearance, and venous and arterial blood clots.	rs783147	801	Fracture of ankle and foot	0.029	0.8949	0	65	3	NA	Strongly supported	DKFZp779M0222	9071	A6PVI2:P00747:Q5TEH5	NP_000292.1:NP_001161810.1
Matrisome-associated	ECM Regulators	PLG	plasminogen	9071	urokinase	urokinase can be used for the treatment of pulminary embolism, coronary artery thrombosis, iv catheter clearance, and venous and arterial blood clots.	rs783147	855	Mechanical complication of nervous system device, implant, and graft	0.03239	1.716	0	13	0	NA	Likely	DKFZp779M0222	9071	A6PVI2:P00747:Q5TEH5	NP_000292.1:NP_001161810.1
Matrisome-associated	ECM Regulators	PLG	plasminogen	9071	urokinase	urokinase can be used for the treatment of pulminary embolism, coronary artery thrombosis, iv catheter clearance, and venous and arterial blood clots.	rs783147	870.4	Open wound of nose and sinus	0.005933	2.074	0	87	1	NA	Strongly supported	DKFZp779M0222	9071	A6PVI2:P00747:Q5TEH5	NP_000292.1:NP_001161810.1
Matrisome-associated	ECM Regulators	PLG	plasminogen	9071	urokinase	urokinase can be used for the treatment of pulminary embolism, coronary artery thrombosis, iv catheter clearance, and venous and arterial blood clots.	rs783147	871.1	Open wound of hand except finger(s)	0.0363	0.8239	0	295	0	NA	Likely	DKFZp779M0222	9071	A6PVI2:P00747:Q5TEH5	NP_000292.1:NP_001161810.1
Matrisome-associated	ECM Regulators	PLG	plasminogen	9071	urokinase	urokinase can be used for the treatment of pulminary embolism, coronary artery thrombosis, iv catheter clearance, and venous and arterial blood clots.	rs783147	941	Allergy to serum or vaccine	0.01722	1.633	0	8	0	NA	Likely	DKFZp779M0222	9071	A6PVI2:P00747:Q5TEH5	NP_000292.1:NP_001161810.1
