# Supplementary material for: The Human Extracellular Matrix Diseasome Reveals Genotype–Phenotype Associations with Clinical Implications for Age-Related Diseases
Source: Biomedicines. 2023 Apr 19;11(4):1212. doi: 10.3390/biomedicines11041212 (PMC10135578; doi:10.3390/biomedicines11041212)
Supplement: Supplementary file 1 [file biomedicines-11-01212-s001.zip › Table_S11_Matrisome_rarediseases_data.csv]

division	category	Gene Symbol	Gene Name	geneid	Disease	Source	OrphaNumber	UniProt_IDs	Refseq_IDs
Core matrisome	Collagens	COL10A1	collagen, type X, alpha 1	2185	Metaphyseal chondrodysplasia, Schmid type	Ensembl	174	Q03692:Q5QPC7:Q5QPC8	NP_000484.2:XP_006715395.1:XP_006715396.1
Core matrisome	Collagens	COL10A1	collagen, type X, alpha 1	2185	Metaphyseal chondrodysplasia, Schmid type	NA	174	Q03692:Q5QPC7:Q5QPC8	NP_000484.2:XP_006715395.1:XP_006715396.1
Core matrisome	Collagens	COL10A1	collagen, type X, alpha 1	2185	Metaphyseal chondrodysplasia, Schmid type	Genatlas	174	Q03692:Q5QPC7:Q5QPC8	NP_000484.2:XP_006715395.1:XP_006715396.1
Core matrisome	Collagens	COL10A1	collagen, type X, alpha 1	2185	Metaphyseal chondrodysplasia, Schmid type	HGNC	174	Q03692:Q5QPC7:Q5QPC8	NP_000484.2:XP_006715395.1:XP_006715396.1
Core matrisome	Collagens	COL10A1	collagen, type X, alpha 1	2185	Metaphyseal chondrodysplasia, Schmid type	OMIM	174	Q03692:Q5QPC7:Q5QPC8	NP_000484.2:XP_006715395.1:XP_006715396.1
Core matrisome	Collagens	COL10A1	collagen, type X, alpha 1	2185	Metaphyseal chondrodysplasia, Schmid type	Reactome	174	Q03692:Q5QPC7:Q5QPC8	NP_000484.2:XP_006715395.1:XP_006715396.1
Core matrisome	Collagens	COL10A1	collagen, type X, alpha 1	2185	Metaphyseal chondrodysplasia, Schmid type	SwissProt	174	Q03692:Q5QPC7:Q5QPC8	NP_000484.2:XP_006715395.1:XP_006715396.1
Core matrisome	Collagens	COL10A1	collagen, type X, alpha 1	2185	Metaphyseal chondrodysplasia, Schmid type	NA	174	Q03692:Q5QPC7:Q5QPC8	NP_000484.2:XP_006715395.1:XP_006715396.1
Core matrisome	Collagens	COL11A1	collagen, type XI, alpha 1	2186	Autosomal dominant myopia-midfacial retrusion-sensorineural hearing loss-rhizomelic dysplasia syndrome	NA	440354	C9JMN2:H7C381:P12107	NP_001177638.1:NP_001845.3:NP_542196.2:NP_542197.3
Core matrisome	Collagens	COL11A1	collagen, type XI, alpha 1	2186	Autosomal dominant myopia-midfacial retrusion-sensorineural hearing loss-rhizomelic dysplasia syndrome	NA	440354	C9JMN2:H7C381:P12107	NP_001177638.1:NP_001845.3:NP_542196.2:NP_542197.3
Core matrisome	Collagens	COL11A1	collagen, type XI, alpha 1	2186	Autosomal dominant myopia-midfacial retrusion-sensorineural hearing loss-rhizomelic dysplasia syndrome	NA	440354	C9JMN2:H7C381:P12107	NP_001177638.1:NP_001845.3:NP_542196.2:NP_542197.3
Core matrisome	Collagens	COL11A1	collagen, type XI, alpha 1	2186	Autosomal dominant myopia-midfacial retrusion-sensorineural hearing loss-rhizomelic dysplasia syndrome	Genatlas	440354	C9JMN2:H7C381:P12107	NP_001177638.1:NP_001845.3:NP_542196.2:NP_542197.3
Core matrisome	Collagens	COL11A1	collagen, type XI, alpha 1	2186	Autosomal dominant myopia-midfacial retrusion-sensorineural hearing loss-rhizomelic dysplasia syndrome	HGNC	440354	C9JMN2:H7C381:P12107	NP_001177638.1:NP_001845.3:NP_542196.2:NP_542197.3
Core matrisome	Collagens	COL11A1	collagen, type XI, alpha 1	2186	Autosomal dominant myopia-midfacial retrusion-sensorineural hearing loss-rhizomelic dysplasia syndrome	OMIM	440354	C9JMN2:H7C381:P12107	NP_001177638.1:NP_001845.3:NP_542196.2:NP_542197.3
Core matrisome	Collagens	COL11A1	collagen, type XI, alpha 1	2186	Autosomal dominant myopia-midfacial retrusion-sensorineural hearing loss-rhizomelic dysplasia syndrome	Reactome	440354	C9JMN2:H7C381:P12107	NP_001177638.1:NP_001845.3:NP_542196.2:NP_542197.3
Core matrisome	Collagens	COL11A1	collagen, type XI, alpha 1	2186	Autosomal dominant myopia-midfacial retrusion-sensorineural hearing loss-rhizomelic dysplasia syndrome	SwissProt	440354	C9JMN2:H7C381:P12107	NP_001177638.1:NP_001845.3:NP_542196.2:NP_542197.3
Core matrisome	Collagens	COL11A1	collagen, type XI, alpha 1	2186	Autosomal dominant myopia-midfacial retrusion-sensorineural hearing loss-rhizomelic dysplasia syndrome	NA	440354	C9JMN2:H7C381:P12107	NP_001177638.1:NP_001845.3:NP_542196.2:NP_542197.3
Core matrisome	Collagens	COL11A1	collagen, type XI, alpha 1	2186	Autosomal dominant myopia-midfacial retrusion-sensorineural hearing loss-rhizomelic dysplasia syndrome	Ensembl	440354	C9JMN2:H7C381:P12107	NP_001177638.1:NP_001845.3:NP_542196.2:NP_542197.3
Core matrisome	Collagens	COL11A1	collagen, type XI, alpha 1	2186	Autosomal recessive Stickler syndrome	NA	250984	C9JMN2:H7C381:P12107	NP_001177638.1:NP_001845.3:NP_542196.2:NP_542197.3
Core matrisome	Collagens	COL11A1	collagen, type XI, alpha 1	2186	Autosomal recessive Stickler syndrome	NA	250984	C9JMN2:H7C381:P12107	NP_001177638.1:NP_001845.3:NP_542196.2:NP_542197.3
Core matrisome	Collagens	COL11A1	collagen, type XI, alpha 1	2186	Autosomal recessive Stickler syndrome	NA	250984	C9JMN2:H7C381:P12107	NP_001177638.1:NP_001845.3:NP_542196.2:NP_542197.3
Core matrisome	Collagens	COL11A1	collagen, type XI, alpha 1	2186	Autosomal recessive Stickler syndrome	Genatlas	250984	C9JMN2:H7C381:P12107	NP_001177638.1:NP_001845.3:NP_542196.2:NP_542197.3
Core matrisome	Collagens	COL11A1	collagen, type XI, alpha 1	2186	Autosomal recessive Stickler syndrome	HGNC	250984	C9JMN2:H7C381:P12107	NP_001177638.1:NP_001845.3:NP_542196.2:NP_542197.3
Core matrisome	Collagens	COL11A1	collagen, type XI, alpha 1	2186	Autosomal recessive Stickler syndrome	OMIM	250984	C9JMN2:H7C381:P12107	NP_001177638.1:NP_001845.3:NP_542196.2:NP_542197.3
Core matrisome	Collagens	COL11A1	collagen, type XI, alpha 1	2186	Autosomal recessive Stickler syndrome	Reactome	250984	C9JMN2:H7C381:P12107	NP_001177638.1:NP_001845.3:NP_542196.2:NP_542197.3
Core matrisome	Collagens	COL11A1	collagen, type XI, alpha 1	2186	Autosomal recessive Stickler syndrome	SwissProt	250984	C9JMN2:H7C381:P12107	NP_001177638.1:NP_001845.3:NP_542196.2:NP_542197.3
Core matrisome	Collagens	COL11A1	collagen, type XI, alpha 1	2186	Autosomal recessive Stickler syndrome	NA	250984	C9JMN2:H7C381:P12107	NP_001177638.1:NP_001845.3:NP_542196.2:NP_542197.3
Core matrisome	Collagens	COL11A1	collagen, type XI, alpha 1	2186	Autosomal recessive Stickler syndrome	Ensembl	250984	C9JMN2:H7C381:P12107	NP_001177638.1:NP_001845.3:NP_542196.2:NP_542197.3
Core matrisome	Collagens	COL11A1	collagen, type XI, alpha 1	2186	Fibrochondrogenesis	Ensembl	2021	C9JMN2:H7C381:P12107	NP_001177638.1:NP_001845.3:NP_542196.2:NP_542197.3
Core matrisome	Collagens	COL11A1	collagen, type XI, alpha 1	2186	Fibrochondrogenesis	NA	2021	C9JMN2:H7C381:P12107	NP_001177638.1:NP_001845.3:NP_542196.2:NP_542197.3
Core matrisome	Collagens	COL11A1	collagen, type XI, alpha 1	2186	Fibrochondrogenesis	NA	2021	C9JMN2:H7C381:P12107	NP_001177638.1:NP_001845.3:NP_542196.2:NP_542197.3
Core matrisome	Collagens	COL11A1	collagen, type XI, alpha 1	2186	Fibrochondrogenesis	NA	2021	C9JMN2:H7C381:P12107	NP_001177638.1:NP_001845.3:NP_542196.2:NP_542197.3
Core matrisome	Collagens	COL11A1	collagen, type XI, alpha 1	2186	Fibrochondrogenesis	Genatlas	2021	C9JMN2:H7C381:P12107	NP_001177638.1:NP_001845.3:NP_542196.2:NP_542197.3
Core matrisome	Collagens	COL11A1	collagen, type XI, alpha 1	2186	Fibrochondrogenesis	HGNC	2021	C9JMN2:H7C381:P12107	NP_001177638.1:NP_001845.3:NP_542196.2:NP_542197.3
Core matrisome	Collagens	COL11A1	collagen, type XI, alpha 1	2186	Fibrochondrogenesis	OMIM	2021	C9JMN2:H7C381:P12107	NP_001177638.1:NP_001845.3:NP_542196.2:NP_542197.3
Core matrisome	Collagens	COL11A1	collagen, type XI, alpha 1	2186	Fibrochondrogenesis	Reactome	2021	C9JMN2:H7C381:P12107	NP_001177638.1:NP_001845.3:NP_542196.2:NP_542197.3
Core matrisome	Collagens	COL11A1	collagen, type XI, alpha 1	2186	Fibrochondrogenesis	SwissProt	2021	C9JMN2:H7C381:P12107	NP_001177638.1:NP_001845.3:NP_542196.2:NP_542197.3
Core matrisome	Collagens	COL11A1	collagen, type XI, alpha 1	2186	Fibrochondrogenesis	NA	2021	C9JMN2:H7C381:P12107	NP_001177638.1:NP_001845.3:NP_542196.2:NP_542197.3
Core matrisome	Collagens	COL11A1	collagen, type XI, alpha 1	2186	Marshall syndrome	Ensembl	560	C9JMN2:H7C381:P12107	NP_001177638.1:NP_001845.3:NP_542196.2:NP_542197.3
Core matrisome	Collagens	COL11A1	collagen, type XI, alpha 1	2186	Marshall syndrome	NA	560	C9JMN2:H7C381:P12107	NP_001177638.1:NP_001845.3:NP_542196.2:NP_542197.3
Core matrisome	Collagens	COL11A1	collagen, type XI, alpha 1	2186	Marshall syndrome	NA	560	C9JMN2:H7C381:P12107	NP_001177638.1:NP_001845.3:NP_542196.2:NP_542197.3
Core matrisome	Collagens	COL11A1	collagen, type XI, alpha 1	2186	Marshall syndrome	NA	560	C9JMN2:H7C381:P12107	NP_001177638.1:NP_001845.3:NP_542196.2:NP_542197.3
Core matrisome	Collagens	COL11A1	collagen, type XI, alpha 1	2186	Marshall syndrome	Genatlas	560	C9JMN2:H7C381:P12107	NP_001177638.1:NP_001845.3:NP_542196.2:NP_542197.3
Core matrisome	Collagens	COL11A1	collagen, type XI, alpha 1	2186	Marshall syndrome	HGNC	560	C9JMN2:H7C381:P12107	NP_001177638.1:NP_001845.3:NP_542196.2:NP_542197.3
Core matrisome	Collagens	COL11A1	collagen, type XI, alpha 1	2186	Marshall syndrome	OMIM	560	C9JMN2:H7C381:P12107	NP_001177638.1:NP_001845.3:NP_542196.2:NP_542197.3
Core matrisome	Collagens	COL11A1	collagen, type XI, alpha 1	2186	Marshall syndrome	Reactome	560	C9JMN2:H7C381:P12107	NP_001177638.1:NP_001845.3:NP_542196.2:NP_542197.3
Core matrisome	Collagens	COL11A1	collagen, type XI, alpha 1	2186	Marshall syndrome	SwissProt	560	C9JMN2:H7C381:P12107	NP_001177638.1:NP_001845.3:NP_542196.2:NP_542197.3
Core matrisome	Collagens	COL11A1	collagen, type XI, alpha 1	2186	Marshall syndrome	NA	560	C9JMN2:H7C381:P12107	NP_001177638.1:NP_001845.3:NP_542196.2:NP_542197.3
Core matrisome	Collagens	COL11A1	collagen, type XI, alpha 1	2186	Stickler syndrome type 2	Ensembl	90654	C9JMN2:H7C381:P12107	NP_001177638.1:NP_001845.3:NP_542196.2:NP_542197.3
Core matrisome	Collagens	COL11A1	collagen, type XI, alpha 1	2186	Stickler syndrome type 2	NA	90654	C9JMN2:H7C381:P12107	NP_001177638.1:NP_001845.3:NP_542196.2:NP_542197.3
Core matrisome	Collagens	COL11A1	collagen, type XI, alpha 1	2186	Stickler syndrome type 2	NA	90654	C9JMN2:H7C381:P12107	NP_001177638.1:NP_001845.3:NP_542196.2:NP_542197.3
Core matrisome	Collagens	COL11A1	collagen, type XI, alpha 1	2186	Stickler syndrome type 2	NA	90654	C9JMN2:H7C381:P12107	NP_001177638.1:NP_001845.3:NP_542196.2:NP_542197.3
Core matrisome	Collagens	COL11A1	collagen, type XI, alpha 1	2186	Stickler syndrome type 2	Genatlas	90654	C9JMN2:H7C381:P12107	NP_001177638.1:NP_001845.3:NP_542196.2:NP_542197.3
Core matrisome	Collagens	COL11A1	collagen, type XI, alpha 1	2186	Stickler syndrome type 2	HGNC	90654	C9JMN2:H7C381:P12107	NP_001177638.1:NP_001845.3:NP_542196.2:NP_542197.3
Core matrisome	Collagens	COL11A1	collagen, type XI, alpha 1	2186	Stickler syndrome type 2	OMIM	90654	C9JMN2:H7C381:P12107	NP_001177638.1:NP_001845.3:NP_542196.2:NP_542197.3
Core matrisome	Collagens	COL11A1	collagen, type XI, alpha 1	2186	Stickler syndrome type 2	Reactome	90654	C9JMN2:H7C381:P12107	NP_001177638.1:NP_001845.3:NP_542196.2:NP_542197.3
Core matrisome	Collagens	COL11A1	collagen, type XI, alpha 1	2186	Stickler syndrome type 2	SwissProt	90654	C9JMN2:H7C381:P12107	NP_001177638.1:NP_001845.3:NP_542196.2:NP_542197.3
Core matrisome	Collagens	COL11A1	collagen, type XI, alpha 1	2186	Stickler syndrome type 2	NA	90654	C9JMN2:H7C381:P12107	NP_001177638.1:NP_001845.3:NP_542196.2:NP_542197.3
Core matrisome	Collagens	COL11A2	collagen, type XI, alpha 2	2187	Autosomal dominant non-syndromic sensorineural deafness type DFNA	NA	90635	A2AAS7:H0Y3B3:H0Y3B5:H0Y3M9:H0YHM5:H0YHM9:H0YIS1:P13942:Q4VXY6	NP_001157243.1:NP_542411.2:NP_542412.2:NP_542410.2:NP_542412.2
Core matrisome	Collagens	COL11A2	collagen, type XI, alpha 2	2187	Autosomal dominant non-syndromic sensorineural deafness type DFNA	Genatlas	90635	A2AAS7:H0Y3B3:H0Y3B5:H0Y3M9:H0YHM5:H0YHM9:H0YIS1:P13942:Q4VXY6	NP_001157243.1:NP_542411.2:NP_542412.2:NP_542410.2:NP_542412.2
Core matrisome	Collagens	COL11A2	collagen, type XI, alpha 2	2187	Autosomal dominant non-syndromic sensorineural deafness type DFNA	HGNC	90635	A2AAS7:H0Y3B3:H0Y3B5:H0Y3M9:H0YHM5:H0YHM9:H0YIS1:P13942:Q4VXY6	NP_001157243.1:NP_542411.2:NP_542412.2:NP_542410.2:NP_542412.2
Core matrisome	Collagens	COL11A2	collagen, type XI, alpha 2	2187	Autosomal dominant non-syndromic sensorineural deafness type DFNA	OMIM	90635	A2AAS7:H0Y3B3:H0Y3B5:H0Y3M9:H0YHM5:H0YHM9:H0YIS1:P13942:Q4VXY6	NP_001157243.1:NP_542411.2:NP_542412.2:NP_542410.2:NP_542412.2
Core matrisome	Collagens	COL11A2	collagen, type XI, alpha 2	2187	Autosomal dominant non-syndromic sensorineural deafness type DFNA	Reactome	90635	A2AAS7:H0Y3B3:H0Y3B5:H0Y3M9:H0YHM5:H0YHM9:H0YIS1:P13942:Q4VXY6	NP_001157243.1:NP_542411.2:NP_542412.2:NP_542410.2:NP_542412.2
Core matrisome	Collagens	COL11A2	collagen, type XI, alpha 2	2187	Autosomal dominant non-syndromic sensorineural deafness type DFNA	SwissProt	90635	A2AAS7:H0Y3B3:H0Y3B5:H0Y3M9:H0YHM5:H0YHM9:H0YIS1:P13942:Q4VXY6	NP_001157243.1:NP_542411.2:NP_542412.2:NP_542410.2:NP_542412.2
Core matrisome	Collagens	COL11A2	collagen, type XI, alpha 2	2187	Autosomal dominant non-syndromic sensorineural deafness type DFNA	NA	90635	A2AAS7:H0Y3B3:H0Y3B5:H0Y3M9:H0YHM5:H0YHM9:H0YIS1:P13942:Q4VXY6	NP_001157243.1:NP_542411.2:NP_542412.2:NP_542410.2:NP_542412.2
Core matrisome	Collagens	COL11A2	collagen, type XI, alpha 2	2187	Autosomal dominant non-syndromic sensorineural deafness type DFNA	Ensembl	90635	A2AAS7:H0Y3B3:H0Y3B5:H0Y3M9:H0YHM5:H0YHM9:H0YIS1:P13942:Q4VXY6	NP_001157243.1:NP_542411.2:NP_542412.2:NP_542410.2:NP_542412.2
Core matrisome	Collagens	COL11A2	collagen, type XI, alpha 2	2187	Autosomal recessive non-syndromic sensorineural deafness type DFNB	NA	90636	A2AAS7:H0Y3B3:H0Y3B5:H0Y3M9:H0YHM5:H0YHM9:H0YIS1:P13942:Q4VXY6	NP_001157243.1:NP_542411.2:NP_542412.2:NP_542410.2:NP_542412.2
Core matrisome	Collagens	COL11A2	collagen, type XI, alpha 2	2187	Autosomal recessive non-syndromic sensorineural deafness type DFNB	Genatlas	90636	A2AAS7:H0Y3B3:H0Y3B5:H0Y3M9:H0YHM5:H0YHM9:H0YIS1:P13942:Q4VXY6	NP_001157243.1:NP_542411.2:NP_542412.2:NP_542410.2:NP_542412.2
Core matrisome	Collagens	COL11A2	collagen, type XI, alpha 2	2187	Autosomal recessive non-syndromic sensorineural deafness type DFNB	HGNC	90636	A2AAS7:H0Y3B3:H0Y3B5:H0Y3M9:H0YHM5:H0YHM9:H0YIS1:P13942:Q4VXY6	NP_001157243.1:NP_542411.2:NP_542412.2:NP_542410.2:NP_542412.2
Core matrisome	Collagens	COL11A2	collagen, type XI, alpha 2	2187	Autosomal recessive non-syndromic sensorineural deafness type DFNB	OMIM	90636	A2AAS7:H0Y3B3:H0Y3B5:H0Y3M9:H0YHM5:H0YHM9:H0YIS1:P13942:Q4VXY6	NP_001157243.1:NP_542411.2:NP_542412.2:NP_542410.2:NP_542412.2
Core matrisome	Collagens	COL11A2	collagen, type XI, alpha 2	2187	Autosomal recessive non-syndromic sensorineural deafness type DFNB	Reactome	90636	A2AAS7:H0Y3B3:H0Y3B5:H0Y3M9:H0YHM5:H0YHM9:H0YIS1:P13942:Q4VXY6	NP_001157243.1:NP_542411.2:NP_542412.2:NP_542410.2:NP_542412.2
Core matrisome	Collagens	COL11A2	collagen, type XI, alpha 2	2187	Autosomal recessive non-syndromic sensorineural deafness type DFNB	SwissProt	90636	A2AAS7:H0Y3B3:H0Y3B5:H0Y3M9:H0YHM5:H0YHM9:H0YIS1:P13942:Q4VXY6	NP_001157243.1:NP_542411.2:NP_542412.2:NP_542410.2:NP_542412.2
Core matrisome	Collagens	COL11A2	collagen, type XI, alpha 2	2187	Autosomal recessive non-syndromic sensorineural deafness type DFNB	NA	90636	A2AAS7:H0Y3B3:H0Y3B5:H0Y3M9:H0YHM5:H0YHM9:H0YIS1:P13942:Q4VXY6	NP_001157243.1:NP_542411.2:NP_542412.2:NP_542410.2:NP_542412.2
Core matrisome	Collagens	COL11A2	collagen, type XI, alpha 2	2187	Autosomal recessive non-syndromic sensorineural deafness type DFNB	Ensembl	90636	A2AAS7:H0Y3B3:H0Y3B5:H0Y3M9:H0YHM5:H0YHM9:H0YIS1:P13942:Q4VXY6	NP_001157243.1:NP_542411.2:NP_542412.2:NP_542410.2:NP_542412.2
Core matrisome	Collagens	COL11A2	collagen, type XI, alpha 2	2187	Fibrochondrogenesis	Ensembl	2021	A2AAS7:H0Y3B3:H0Y3B5:H0Y3M9:H0YHM5:H0YHM9:H0YIS1:P13942:Q4VXY6	NP_001157243.1:NP_542411.2:NP_542412.2:NP_542410.2:NP_542412.2
Core matrisome	Collagens	COL11A2	collagen, type XI, alpha 2	2187	Fibrochondrogenesis	NA	2021	A2AAS7:H0Y3B3:H0Y3B5:H0Y3M9:H0YHM5:H0YHM9:H0YIS1:P13942:Q4VXY6	NP_001157243.1:NP_542411.2:NP_542412.2:NP_542410.2:NP_542412.2
Core matrisome	Collagens	COL11A2	collagen, type XI, alpha 2	2187	Fibrochondrogenesis	Genatlas	2021	A2AAS7:H0Y3B3:H0Y3B5:H0Y3M9:H0YHM5:H0YHM9:H0YIS1:P13942:Q4VXY6	NP_001157243.1:NP_542411.2:NP_542412.2:NP_542410.2:NP_542412.2
Core matrisome	Collagens	COL11A2	collagen, type XI, alpha 2	2187	Fibrochondrogenesis	HGNC	2021	A2AAS7:H0Y3B3:H0Y3B5:H0Y3M9:H0YHM5:H0YHM9:H0YIS1:P13942:Q4VXY6	NP_001157243.1:NP_542411.2:NP_542412.2:NP_542410.2:NP_542412.2
Core matrisome	Collagens	COL11A2	collagen, type XI, alpha 2	2187	Fibrochondrogenesis	OMIM	2021	A2AAS7:H0Y3B3:H0Y3B5:H0Y3M9:H0YHM5:H0YHM9:H0YIS1:P13942:Q4VXY6	NP_001157243.1:NP_542411.2:NP_542412.2:NP_542410.2:NP_542412.2
Core matrisome	Collagens	COL11A2	collagen, type XI, alpha 2	2187	Fibrochondrogenesis	Reactome	2021	A2AAS7:H0Y3B3:H0Y3B5:H0Y3M9:H0YHM5:H0YHM9:H0YIS1:P13942:Q4VXY6	NP_001157243.1:NP_542411.2:NP_542412.2:NP_542410.2:NP_542412.2
Core matrisome	Collagens	COL11A2	collagen, type XI, alpha 2	2187	Fibrochondrogenesis	SwissProt	2021	A2AAS7:H0Y3B3:H0Y3B5:H0Y3M9:H0YHM5:H0YHM9:H0YIS1:P13942:Q4VXY6	NP_001157243.1:NP_542411.2:NP_542412.2:NP_542410.2:NP_542412.2
Core matrisome	Collagens	COL11A2	collagen, type XI, alpha 2	2187	Fibrochondrogenesis	NA	2021	A2AAS7:H0Y3B3:H0Y3B5:H0Y3M9:H0YHM5:H0YHM9:H0YIS1:P13942:Q4VXY6	NP_001157243.1:NP_542411.2:NP_542412.2:NP_542410.2:NP_542412.2
Core matrisome	Collagens	COL11A2	collagen, type XI, alpha 2	2187	Otospondylomegaepiphyseal dysplasia	Ensembl	1427	A2AAS7:H0Y3B3:H0Y3B5:H0Y3M9:H0YHM5:H0YHM9:H0YIS1:P13942:Q4VXY6	NP_001157243.1:NP_542411.2:NP_542412.2:NP_542410.2:NP_542412.2
Core matrisome	Collagens	COL11A2	collagen, type XI, alpha 2	2187	Otospondylomegaepiphyseal dysplasia	NA	1427	A2AAS7:H0Y3B3:H0Y3B5:H0Y3M9:H0YHM5:H0YHM9:H0YIS1:P13942:Q4VXY6	NP_001157243.1:NP_542411.2:NP_542412.2:NP_542410.2:NP_542412.2
Core matrisome	Collagens	COL11A2	collagen, type XI, alpha 2	2187	Otospondylomegaepiphyseal dysplasia	Genatlas	1427	A2AAS7:H0Y3B3:H0Y3B5:H0Y3M9:H0YHM5:H0YHM9:H0YIS1:P13942:Q4VXY6	NP_001157243.1:NP_542411.2:NP_542412.2:NP_542410.2:NP_542412.2
Core matrisome	Collagens	COL11A2	collagen, type XI, alpha 2	2187	Otospondylomegaepiphyseal dysplasia	HGNC	1427	A2AAS7:H0Y3B3:H0Y3B5:H0Y3M9:H0YHM5:H0YHM9:H0YIS1:P13942:Q4VXY6	NP_001157243.1:NP_542411.2:NP_542412.2:NP_542410.2:NP_542412.2
Core matrisome	Collagens	COL11A2	collagen, type XI, alpha 2	2187	Otospondylomegaepiphyseal dysplasia	OMIM	1427	A2AAS7:H0Y3B3:H0Y3B5:H0Y3M9:H0YHM5:H0YHM9:H0YIS1:P13942:Q4VXY6	NP_001157243.1:NP_542411.2:NP_542412.2:NP_542410.2:NP_542412.2
Core matrisome	Collagens	COL11A2	collagen, type XI, alpha 2	2187	Otospondylomegaepiphyseal dysplasia	Reactome	1427	A2AAS7:H0Y3B3:H0Y3B5:H0Y3M9:H0YHM5:H0YHM9:H0YIS1:P13942:Q4VXY6	NP_001157243.1:NP_542411.2:NP_542412.2:NP_542410.2:NP_542412.2
Core matrisome	Collagens	COL11A2	collagen, type XI, alpha 2	2187	Otospondylomegaepiphyseal dysplasia	SwissProt	1427	A2AAS7:H0Y3B3:H0Y3B5:H0Y3M9:H0YHM5:H0YHM9:H0YIS1:P13942:Q4VXY6	NP_001157243.1:NP_542411.2:NP_542412.2:NP_542410.2:NP_542412.2
Core matrisome	Collagens	COL11A2	collagen, type XI, alpha 2	2187	Otospondylomegaepiphyseal dysplasia	NA	1427	A2AAS7:H0Y3B3:H0Y3B5:H0Y3M9:H0YHM5:H0YHM9:H0YIS1:P13942:Q4VXY6	NP_001157243.1:NP_542411.2:NP_542412.2:NP_542410.2:NP_542412.2
Core matrisome	Collagens	COL11A2	collagen, type XI, alpha 2	2187	Stickler syndrome type 3	Ensembl	166100	A2AAS7:H0Y3B3:H0Y3B5:H0Y3M9:H0YHM5:H0YHM9:H0YIS1:P13942:Q4VXY6	NP_001157243.1:NP_542411.2:NP_542412.2:NP_542410.2:NP_542412.2
Core matrisome	Collagens	COL11A2	collagen, type XI, alpha 2	2187	Stickler syndrome type 3	NA	166100	A2AAS7:H0Y3B3:H0Y3B5:H0Y3M9:H0YHM5:H0YHM9:H0YIS1:P13942:Q4VXY6	NP_001157243.1:NP_542411.2:NP_542412.2:NP_542410.2:NP_542412.2
Core matrisome	Collagens	COL11A2	collagen, type XI, alpha 2	2187	Stickler syndrome type 3	Genatlas	166100	A2AAS7:H0Y3B3:H0Y3B5:H0Y3M9:H0YHM5:H0YHM9:H0YIS1:P13942:Q4VXY6	NP_001157243.1:NP_542411.2:NP_542412.2:NP_542410.2:NP_542412.2
Core matrisome	Collagens	COL11A2	collagen, type XI, alpha 2	2187	Stickler syndrome type 3	HGNC	166100	A2AAS7:H0Y3B3:H0Y3B5:H0Y3M9:H0YHM5:H0YHM9:H0YIS1:P13942:Q4VXY6	NP_001157243.1:NP_542411.2:NP_542412.2:NP_542410.2:NP_542412.2
Core matrisome	Collagens	COL11A2	collagen, type XI, alpha 2	2187	Stickler syndrome type 3	OMIM	166100	A2AAS7:H0Y3B3:H0Y3B5:H0Y3M9:H0YHM5:H0YHM9:H0YIS1:P13942:Q4VXY6	NP_001157243.1:NP_542411.2:NP_542412.2:NP_542410.2:NP_542412.2
Core matrisome	Collagens	COL11A2	collagen, type XI, alpha 2	2187	Stickler syndrome type 3	Reactome	166100	A2AAS7:H0Y3B3:H0Y3B5:H0Y3M9:H0YHM5:H0YHM9:H0YIS1:P13942:Q4VXY6	NP_001157243.1:NP_542411.2:NP_542412.2:NP_542410.2:NP_542412.2
Core matrisome	Collagens	COL11A2	collagen, type XI, alpha 2	2187	Stickler syndrome type 3	SwissProt	166100	A2AAS7:H0Y3B3:H0Y3B5:H0Y3M9:H0YHM5:H0YHM9:H0YIS1:P13942:Q4VXY6	NP_001157243.1:NP_542411.2:NP_542412.2:NP_542410.2:NP_542412.2
Core matrisome	Collagens	COL11A2	collagen, type XI, alpha 2	2187	Stickler syndrome type 3	NA	166100	A2AAS7:H0Y3B3:H0Y3B5:H0Y3M9:H0YHM5:H0YHM9:H0YIS1:P13942:Q4VXY6	NP_001157243.1:NP_542411.2:NP_542412.2:NP_542410.2:NP_542412.2
Core matrisome	Collagens	COL11A2	collagen, type XI, alpha 2	2187	Weissenbacher- Zweymuller syndrome	Ensembl	3450	A2AAS7:H0Y3B3:H0Y3B5:H0Y3M9:H0YHM5:H0YHM9:H0YIS1:P13942:Q4VXY6	NP_001157243.1:NP_542411.2:NP_542412.2:NP_542410.2:NP_542412.2
Core matrisome	Collagens	COL11A2	collagen, type XI, alpha 2	2187	Weissenbacher- Zweymuller syndrome	NA	3450	A2AAS7:H0Y3B3:H0Y3B5:H0Y3M9:H0YHM5:H0YHM9:H0YIS1:P13942:Q4VXY6	NP_001157243.1:NP_542411.2:NP_542412.2:NP_542410.2:NP_542412.2
Core matrisome	Collagens	COL11A2	collagen, type XI, alpha 2	2187	Weissenbacher- Zweymuller syndrome	Genatlas	3450	A2AAS7:H0Y3B3:H0Y3B5:H0Y3M9:H0YHM5:H0YHM9:H0YIS1:P13942:Q4VXY6	NP_001157243.1:NP_542411.2:NP_542412.2:NP_542410.2:NP_542412.2
Core matrisome	Collagens	COL11A2	collagen, type XI, alpha 2	2187	Weissenbacher- Zweymuller syndrome	HGNC	3450	A2AAS7:H0Y3B3:H0Y3B5:H0Y3M9:H0YHM5:H0YHM9:H0YIS1:P13942:Q4VXY6	NP_001157243.1:NP_542411.2:NP_542412.2:NP_542410.2:NP_542412.2
Core matrisome	Collagens	COL11A2	collagen, type XI, alpha 2	2187	Weissenbacher- Zweymuller syndrome	OMIM	3450	A2AAS7:H0Y3B3:H0Y3B5:H0Y3M9:H0YHM5:H0YHM9:H0YIS1:P13942:Q4VXY6	NP_001157243.1:NP_542411.2:NP_542412.2:NP_542410.2:NP_542412.2
Core matrisome	Collagens	COL11A2	collagen, type XI, alpha 2	2187	Weissenbacher- Zweymuller syndrome	Reactome	3450	A2AAS7:H0Y3B3:H0Y3B5:H0Y3M9:H0YHM5:H0YHM9:H0YIS1:P13942:Q4VXY6	NP_001157243.1:NP_542411.2:NP_542412.2:NP_542410.2:NP_542412.2
Core matrisome	Collagens	COL11A2	collagen, type XI, alpha 2	2187	Weissenbacher- Zweymuller syndrome	SwissProt	3450	A2AAS7:H0Y3B3:H0Y3B5:H0Y3M9:H0YHM5:H0YHM9:H0YIS1:P13942:Q4VXY6	NP_001157243.1:NP_542411.2:NP_542412.2:NP_542410.2:NP_542412.2
Core matrisome	Collagens	COL11A2	collagen, type XI, alpha 2	2187	Weissenbacher- Zweymuller syndrome	NA	3450	A2AAS7:H0Y3B3:H0Y3B5:H0Y3M9:H0YHM5:H0YHM9:H0YIS1:P13942:Q4VXY6	NP_001157243.1:NP_542411.2:NP_542412.2:NP_542410.2:NP_542412.2
Core matrisome	Collagens	COL12A1	collagen, type XII, alpha 1	2188	Bethlem myopathy	NA	610	D6RGG3:H0Y4P7:H0Y5N9:H0Y991:Q99715	NP_004361.3:NP_542376.2
Core matrisome	Collagens	COL12A1	collagen, type XII, alpha 1	2188	Bethlem myopathy	Genatlas	610	D6RGG3:H0Y4P7:H0Y5N9:H0Y991:Q99715	NP_004361.3:NP_542376.2
Core matrisome	Collagens	COL12A1	collagen, type XII, alpha 1	2188	Bethlem myopathy	HGNC	610	D6RGG3:H0Y4P7:H0Y5N9:H0Y991:Q99715	NP_004361.3:NP_542376.2
Core matrisome	Collagens	COL12A1	collagen, type XII, alpha 1	2188	Bethlem myopathy	OMIM	610	D6RGG3:H0Y4P7:H0Y5N9:H0Y991:Q99715	NP_004361.3:NP_542376.2
Core matrisome	Collagens	COL12A1	collagen, type XII, alpha 1	2188	Bethlem myopathy	Reactome	610	D6RGG3:H0Y4P7:H0Y5N9:H0Y991:Q99715	NP_004361.3:NP_542376.2
Core matrisome	Collagens	COL12A1	collagen, type XII, alpha 1	2188	Bethlem myopathy	SwissProt	610	D6RGG3:H0Y4P7:H0Y5N9:H0Y991:Q99715	NP_004361.3:NP_542376.2
Core matrisome	Collagens	COL12A1	collagen, type XII, alpha 1	2188	Bethlem myopathy	NA	610	D6RGG3:H0Y4P7:H0Y5N9:H0Y991:Q99715	NP_004361.3:NP_542376.2
Core matrisome	Collagens	COL12A1	collagen, type XII, alpha 1	2188	Bethlem myopathy	Ensembl	610	D6RGG3:H0Y4P7:H0Y5N9:H0Y991:Q99715	NP_004361.3:NP_542376.2
Core matrisome	Collagens	COL12A1	collagen, type XII, alpha 1	2188	Congenital muscular dystrophy, Ullrich type	NA	75840	D6RGG3:H0Y4P7:H0Y5N9:H0Y991:Q99715	NP_004361.3:NP_542376.2
Core matrisome	Collagens	COL12A1	collagen, type XII, alpha 1	2188	Congenital muscular dystrophy, Ullrich type	Genatlas	75840	D6RGG3:H0Y4P7:H0Y5N9:H0Y991:Q99715	NP_004361.3:NP_542376.2
Core matrisome	Collagens	COL12A1	collagen, type XII, alpha 1	2188	Congenital muscular dystrophy, Ullrich type	HGNC	75840	D6RGG3:H0Y4P7:H0Y5N9:H0Y991:Q99715	NP_004361.3:NP_542376.2
Core matrisome	Collagens	COL12A1	collagen, type XII, alpha 1	2188	Congenital muscular dystrophy, Ullrich type	OMIM	75840	D6RGG3:H0Y4P7:H0Y5N9:H0Y991:Q99715	NP_004361.3:NP_542376.2
Core matrisome	Collagens	COL12A1	collagen, type XII, alpha 1	2188	Congenital muscular dystrophy, Ullrich type	Reactome	75840	D6RGG3:H0Y4P7:H0Y5N9:H0Y991:Q99715	NP_004361.3:NP_542376.2
Core matrisome	Collagens	COL12A1	collagen, type XII, alpha 1	2188	Congenital muscular dystrophy, Ullrich type	SwissProt	75840	D6RGG3:H0Y4P7:H0Y5N9:H0Y991:Q99715	NP_004361.3:NP_542376.2
Core matrisome	Collagens	COL12A1	collagen, type XII, alpha 1	2188	Congenital muscular dystrophy, Ullrich type	NA	75840	D6RGG3:H0Y4P7:H0Y5N9:H0Y991:Q99715	NP_004361.3:NP_542376.2
Core matrisome	Collagens	COL12A1	collagen, type XII, alpha 1	2188	Congenital muscular dystrophy, Ullrich type	Ensembl	75840	D6RGG3:H0Y4P7:H0Y5N9:H0Y991:Q99715	NP_004361.3:NP_542376.2
Core matrisome	Collagens	COL13A1	collagen, type XIII, alpha 1	2190	Postsynaptic congenital myasthenic syndromes	NA	98913	E7ES46:E7ES47:E7ES49:E7ES50:E7ES51:E7ES55:E7ES56:E7EX21:E9PEG9:G5E987:H7BYT9:H7BZB6:Q5TAT6	NP_001123575.1:NP_542988.3:NP_542990.3:NP_542991.3:NP_542992.3:NP_542995.3
Core matrisome	Collagens	COL13A1	collagen, type XIII, alpha 1	2190	Postsynaptic congenital myasthenic syndromes	Genatlas	98913	E7ES46:E7ES47:E7ES49:E7ES50:E7ES51:E7ES55:E7ES56:E7EX21:E9PEG9:G5E987:H7BYT9:H7BZB6:Q5TAT6	NP_001123575.1:NP_542988.3:NP_542990.3:NP_542991.3:NP_542992.3:NP_542995.3
Core matrisome	Collagens	COL13A1	collagen, type XIII, alpha 1	2190	Postsynaptic congenital myasthenic syndromes	HGNC	98913	E7ES46:E7ES47:E7ES49:E7ES50:E7ES51:E7ES55:E7ES56:E7EX21:E9PEG9:G5E987:H7BYT9:H7BZB6:Q5TAT6	NP_001123575.1:NP_542988.3:NP_542990.3:NP_542991.3:NP_542992.3:NP_542995.3
Core matrisome	Collagens	COL13A1	collagen, type XIII, alpha 1	2190	Postsynaptic congenital myasthenic syndromes	OMIM	98913	E7ES46:E7ES47:E7ES49:E7ES50:E7ES51:E7ES55:E7ES56:E7EX21:E9PEG9:G5E987:H7BYT9:H7BZB6:Q5TAT6	NP_001123575.1:NP_542988.3:NP_542990.3:NP_542991.3:NP_542992.3:NP_542995.3
Core matrisome	Collagens	COL13A1	collagen, type XIII, alpha 1	2190	Postsynaptic congenital myasthenic syndromes	Reactome	98913	E7ES46:E7ES47:E7ES49:E7ES50:E7ES51:E7ES55:E7ES56:E7EX21:E9PEG9:G5E987:H7BYT9:H7BZB6:Q5TAT6	NP_001123575.1:NP_542988.3:NP_542990.3:NP_542991.3:NP_542992.3:NP_542995.3
Core matrisome	Collagens	COL13A1	collagen, type XIII, alpha 1	2190	Postsynaptic congenital myasthenic syndromes	SwissProt	98913	E7ES46:E7ES47:E7ES49:E7ES50:E7ES51:E7ES55:E7ES56:E7EX21:E9PEG9:G5E987:H7BYT9:H7BZB6:Q5TAT6	NP_001123575.1:NP_542988.3:NP_542990.3:NP_542991.3:NP_542992.3:NP_542995.3
Core matrisome	Collagens	COL13A1	collagen, type XIII, alpha 1	2190	Postsynaptic congenital myasthenic syndromes	NA	98913	E7ES46:E7ES47:E7ES49:E7ES50:E7ES51:E7ES55:E7ES56:E7EX21:E9PEG9:G5E987:H7BYT9:H7BZB6:Q5TAT6	NP_001123575.1:NP_542988.3:NP_542990.3:NP_542991.3:NP_542992.3:NP_542995.3
Core matrisome	Collagens	COL13A1	collagen, type XIII, alpha 1	2190	Postsynaptic congenital myasthenic syndromes	Ensembl	98913	E7ES46:E7ES47:E7ES49:E7ES50:E7ES51:E7ES55:E7ES56:E7EX21:E9PEG9:G5E987:H7BYT9:H7BZB6:Q5TAT6	NP_001123575.1:NP_542988.3:NP_542990.3:NP_542991.3:NP_542992.3:NP_542995.3
Core matrisome	Collagens	COL13A1	collagen, type XIII, alpha 1	2190	Presynaptic congenital myasthenic syndromes	NA	98914	E7ES46:E7ES47:E7ES49:E7ES50:E7ES51:E7ES55:E7ES56:E7EX21:E9PEG9:G5E987:H7BYT9:H7BZB6:Q5TAT6	NP_001123575.1:NP_542988.3:NP_542990.3:NP_542991.3:NP_542992.3:NP_542995.3
Core matrisome	Collagens	COL13A1	collagen, type XIII, alpha 1	2190	Presynaptic congenital myasthenic syndromes	Genatlas	98914	E7ES46:E7ES47:E7ES49:E7ES50:E7ES51:E7ES55:E7ES56:E7EX21:E9PEG9:G5E987:H7BYT9:H7BZB6:Q5TAT6	NP_001123575.1:NP_542988.3:NP_542990.3:NP_542991.3:NP_542992.3:NP_542995.3
Core matrisome	Collagens	COL13A1	collagen, type XIII, alpha 1	2190	Presynaptic congenital myasthenic syndromes	HGNC	98914	E7ES46:E7ES47:E7ES49:E7ES50:E7ES51:E7ES55:E7ES56:E7EX21:E9PEG9:G5E987:H7BYT9:H7BZB6:Q5TAT6	NP_001123575.1:NP_542988.3:NP_542990.3:NP_542991.3:NP_542992.3:NP_542995.3
Core matrisome	Collagens	COL13A1	collagen, type XIII, alpha 1	2190	Presynaptic congenital myasthenic syndromes	OMIM	98914	E7ES46:E7ES47:E7ES49:E7ES50:E7ES51:E7ES55:E7ES56:E7EX21:E9PEG9:G5E987:H7BYT9:H7BZB6:Q5TAT6	NP_001123575.1:NP_542988.3:NP_542990.3:NP_542991.3:NP_542992.3:NP_542995.3
Core matrisome	Collagens	COL13A1	collagen, type XIII, alpha 1	2190	Presynaptic congenital myasthenic syndromes	Reactome	98914	E7ES46:E7ES47:E7ES49:E7ES50:E7ES51:E7ES55:E7ES56:E7EX21:E9PEG9:G5E987:H7BYT9:H7BZB6:Q5TAT6	NP_001123575.1:NP_542988.3:NP_542990.3:NP_542991.3:NP_542992.3:NP_542995.3
Core matrisome	Collagens	COL13A1	collagen, type XIII, alpha 1	2190	Presynaptic congenital myasthenic syndromes	SwissProt	98914	E7ES46:E7ES47:E7ES49:E7ES50:E7ES51:E7ES55:E7ES56:E7EX21:E9PEG9:G5E987:H7BYT9:H7BZB6:Q5TAT6	NP_001123575.1:NP_542988.3:NP_542990.3:NP_542991.3:NP_542992.3:NP_542995.3
Core matrisome	Collagens	COL13A1	collagen, type XIII, alpha 1	2190	Presynaptic congenital myasthenic syndromes	NA	98914	E7ES46:E7ES47:E7ES49:E7ES50:E7ES51:E7ES55:E7ES56:E7EX21:E9PEG9:G5E987:H7BYT9:H7BZB6:Q5TAT6	NP_001123575.1:NP_542988.3:NP_542990.3:NP_542991.3:NP_542992.3:NP_542995.3
Core matrisome	Collagens	COL13A1	collagen, type XIII, alpha 1	2190	Presynaptic congenital myasthenic syndromes	Ensembl	98914	E7ES46:E7ES47:E7ES49:E7ES50:E7ES51:E7ES55:E7ES56:E7EX21:E9PEG9:G5E987:H7BYT9:H7BZB6:Q5TAT6	NP_001123575.1:NP_542988.3:NP_542990.3:NP_542991.3:NP_542992.3:NP_542995.3
Core matrisome	Collagens	COL14A1	collagen, type XIV, alpha 1	2191	Punctate palmoplantar keratoderma type 1	Ensembl	79501	H0YBB2:J3QT75:J3QT83:Q05707:Q4G0W3	NP_066933.1:XP_005251116.1:XP_006716714.1
Core matrisome	Collagens	COL14A1	collagen, type XIV, alpha 1	2191	Punctate palmoplantar keratoderma type 1	NA	79501	H0YBB2:J3QT75:J3QT83:Q05707:Q4G0W3	NP_066933.1:XP_005251116.1:XP_006716714.1
Core matrisome	Collagens	COL14A1	collagen, type XIV, alpha 1	2191	Punctate palmoplantar keratoderma type 1	Genatlas	79501	H0YBB2:J3QT75:J3QT83:Q05707:Q4G0W3	NP_066933.1:XP_005251116.1:XP_006716714.1
Core matrisome	Collagens	COL14A1	collagen, type XIV, alpha 1	2191	Punctate palmoplantar keratoderma type 1	HGNC	79501	H0YBB2:J3QT75:J3QT83:Q05707:Q4G0W3	NP_066933.1:XP_005251116.1:XP_006716714.1
Core matrisome	Collagens	COL14A1	collagen, type XIV, alpha 1	2191	Punctate palmoplantar keratoderma type 1	OMIM	79501	H0YBB2:J3QT75:J3QT83:Q05707:Q4G0W3	NP_066933.1:XP_005251116.1:XP_006716714.1
Core matrisome	Collagens	COL14A1	collagen, type XIV, alpha 1	2191	Punctate palmoplantar keratoderma type 1	Reactome	79501	H0YBB2:J3QT75:J3QT83:Q05707:Q4G0W3	NP_066933.1:XP_005251116.1:XP_006716714.1
Core matrisome	Collagens	COL14A1	collagen, type XIV, alpha 1	2191	Punctate palmoplantar keratoderma type 1	SwissProt	79501	H0YBB2:J3QT75:J3QT83:Q05707:Q4G0W3	NP_066933.1:XP_005251116.1:XP_006716714.1
Core matrisome	Collagens	COL14A1	collagen, type XIV, alpha 1	2191	Punctate palmoplantar keratoderma type 1	NA	79501	H0YBB2:J3QT75:J3QT83:Q05707:Q4G0W3	NP_066933.1:XP_005251116.1:XP_006716714.1
Core matrisome	Collagens	COL17A1	collagen, type XVII, alpha 1	2194	Epithelial recurrent erosion dystrophy	Ensembl	293381	A2A2Y8:H0Y420:Q9UMD9	NP_000485.3
Core matrisome	Collagens	COL17A1	collagen, type XVII, alpha 1	2194	Epithelial recurrent erosion dystrophy	NA	293381	A2A2Y8:H0Y420:Q9UMD9	NP_000485.3
Core matrisome	Collagens	COL17A1	collagen, type XVII, alpha 1	2194	Epithelial recurrent erosion dystrophy	Genatlas	293381	A2A2Y8:H0Y420:Q9UMD9	NP_000485.3
Core matrisome	Collagens	COL17A1	collagen, type XVII, alpha 1	2194	Epithelial recurrent erosion dystrophy	HGNC	293381	A2A2Y8:H0Y420:Q9UMD9	NP_000485.3
Core matrisome	Collagens	COL17A1	collagen, type XVII, alpha 1	2194	Epithelial recurrent erosion dystrophy	OMIM	293381	A2A2Y8:H0Y420:Q9UMD9	NP_000485.3
Core matrisome	Collagens	COL17A1	collagen, type XVII, alpha 1	2194	Epithelial recurrent erosion dystrophy	Reactome	293381	A2A2Y8:H0Y420:Q9UMD9	NP_000485.3
Core matrisome	Collagens	COL17A1	collagen, type XVII, alpha 1	2194	Epithelial recurrent erosion dystrophy	SwissProt	293381	A2A2Y8:H0Y420:Q9UMD9	NP_000485.3
Core matrisome	Collagens	COL17A1	collagen, type XVII, alpha 1	2194	Epithelial recurrent erosion dystrophy	NA	293381	A2A2Y8:H0Y420:Q9UMD9	NP_000485.3
Core matrisome	Collagens	COL17A1	collagen, type XVII, alpha 1	2194	Junctional epidermolysis bullosa, generalized intermediate	Ensembl	79402	A2A2Y8:H0Y420:Q9UMD9	NP_000485.3
Core matrisome	Collagens	COL17A1	collagen, type XVII, alpha 1	2194	Junctional epidermolysis bullosa, generalized intermediate	NA	79402	A2A2Y8:H0Y420:Q9UMD9	NP_000485.3
Core matrisome	Collagens	COL17A1	collagen, type XVII, alpha 1	2194	Junctional epidermolysis bullosa, generalized intermediate	Genatlas	79402	A2A2Y8:H0Y420:Q9UMD9	NP_000485.3
Core matrisome	Collagens	COL17A1	collagen, type XVII, alpha 1	2194	Junctional epidermolysis bullosa, generalized intermediate	HGNC	79402	A2A2Y8:H0Y420:Q9UMD9	NP_000485.3
Core matrisome	Collagens	COL17A1	collagen, type XVII, alpha 1	2194	Junctional epidermolysis bullosa, generalized intermediate	OMIM	79402	A2A2Y8:H0Y420:Q9UMD9	NP_000485.3
Core matrisome	Collagens	COL17A1	collagen, type XVII, alpha 1	2194	Junctional epidermolysis bullosa, generalized intermediate	Reactome	79402	A2A2Y8:H0Y420:Q9UMD9	NP_000485.3
Core matrisome	Collagens	COL17A1	collagen, type XVII, alpha 1	2194	Junctional epidermolysis bullosa, generalized intermediate	SwissProt	79402	A2A2Y8:H0Y420:Q9UMD9	NP_000485.3
Core matrisome	Collagens	COL17A1	collagen, type XVII, alpha 1	2194	Junctional epidermolysis bullosa, generalized intermediate	NA	79402	A2A2Y8:H0Y420:Q9UMD9	NP_000485.3
Core matrisome	Collagens	COL17A1	collagen, type XVII, alpha 1	2194	Late-onset junctional epidermolysis bullosa	Ensembl	79406	A2A2Y8:H0Y420:Q9UMD9	NP_000485.3
Core matrisome	Collagens	COL17A1	collagen, type XVII, alpha 1	2194	Late-onset junctional epidermolysis bullosa	NA	79406	A2A2Y8:H0Y420:Q9UMD9	NP_000485.3
Core matrisome	Collagens	COL17A1	collagen, type XVII, alpha 1	2194	Late-onset junctional epidermolysis bullosa	Genatlas	79406	A2A2Y8:H0Y420:Q9UMD9	NP_000485.3
Core matrisome	Collagens	COL17A1	collagen, type XVII, alpha 1	2194	Late-onset junctional epidermolysis bullosa	HGNC	79406	A2A2Y8:H0Y420:Q9UMD9	NP_000485.3
Core matrisome	Collagens	COL17A1	collagen, type XVII, alpha 1	2194	Late-onset junctional epidermolysis bullosa	OMIM	79406	A2A2Y8:H0Y420:Q9UMD9	NP_000485.3
Core matrisome	Collagens	COL17A1	collagen, type XVII, alpha 1	2194	Late-onset junctional epidermolysis bullosa	Reactome	79406	A2A2Y8:H0Y420:Q9UMD9	NP_000485.3
Core matrisome	Collagens	COL17A1	collagen, type XVII, alpha 1	2194	Late-onset junctional epidermolysis bullosa	SwissProt	79406	A2A2Y8:H0Y420:Q9UMD9	NP_000485.3
Core matrisome	Collagens	COL17A1	collagen, type XVII, alpha 1	2194	Late-onset junctional epidermolysis bullosa	NA	79406	A2A2Y8:H0Y420:Q9UMD9	NP_000485.3
Core matrisome	Collagens	COL17A1	collagen, type XVII, alpha 1	2194	Localized junctional epidermolysis bullosa, non-Herlitz type	Ensembl	251393	A2A2Y8:H0Y420:Q9UMD9	NP_000485.3
Core matrisome	Collagens	COL17A1	collagen, type XVII, alpha 1	2194	Localized junctional epidermolysis bullosa, non-Herlitz type	NA	251393	A2A2Y8:H0Y420:Q9UMD9	NP_000485.3
Core matrisome	Collagens	COL17A1	collagen, type XVII, alpha 1	2194	Localized junctional epidermolysis bullosa, non-Herlitz type	Genatlas	251393	A2A2Y8:H0Y420:Q9UMD9	NP_000485.3
Core matrisome	Collagens	COL17A1	collagen, type XVII, alpha 1	2194	Localized junctional epidermolysis bullosa, non-Herlitz type	HGNC	251393	A2A2Y8:H0Y420:Q9UMD9	NP_000485.3
Core matrisome	Collagens	COL17A1	collagen, type XVII, alpha 1	2194	Localized junctional epidermolysis bullosa, non-Herlitz type	OMIM	251393	A2A2Y8:H0Y420:Q9UMD9	NP_000485.3
Core matrisome	Collagens	COL17A1	collagen, type XVII, alpha 1	2194	Localized junctional epidermolysis bullosa, non-Herlitz type	Reactome	251393	A2A2Y8:H0Y420:Q9UMD9	NP_000485.3
Core matrisome	Collagens	COL17A1	collagen, type XVII, alpha 1	2194	Localized junctional epidermolysis bullosa, non-Herlitz type	SwissProt	251393	A2A2Y8:H0Y420:Q9UMD9	NP_000485.3
Core matrisome	Collagens	COL17A1	collagen, type XVII, alpha 1	2194	Localized junctional epidermolysis bullosa, non-Herlitz type	NA	251393	A2A2Y8:H0Y420:Q9UMD9	NP_000485.3
Core matrisome	Collagens	COL18A1	collagen, type XVIII, alpha 1	2195	Knobloch syndrome	Ensembl	1571	H7BXV5:H7C457:P39060	NP_085059.2:NP_569712.2
Core matrisome	Collagens	COL18A1	collagen, type XVIII, alpha 1	2195	Knobloch syndrome	NA	1571	H7BXV5:H7C457:P39060	NP_085059.2:NP_569712.2
Core matrisome	Collagens	COL18A1	collagen, type XVIII, alpha 1	2195	Knobloch syndrome	NA	1571	H7BXV5:H7C457:P39060	NP_085059.2:NP_569712.2
Core matrisome	Collagens	COL18A1	collagen, type XVIII, alpha 1	2195	Knobloch syndrome	NA	1571	H7BXV5:H7C457:P39060	NP_085059.2:NP_569712.2
Core matrisome	Collagens	COL18A1	collagen, type XVIII, alpha 1	2195	Knobloch syndrome	Genatlas	1571	H7BXV5:H7C457:P39060	NP_085059.2:NP_569712.2
Core matrisome	Collagens	COL18A1	collagen, type XVIII, alpha 1	2195	Knobloch syndrome	HGNC	1571	H7BXV5:H7C457:P39060	NP_085059.2:NP_569712.2
Core matrisome	Collagens	COL18A1	collagen, type XVIII, alpha 1	2195	Knobloch syndrome	OMIM	1571	H7BXV5:H7C457:P39060	NP_085059.2:NP_569712.2
Core matrisome	Collagens	COL18A1	collagen, type XVIII, alpha 1	2195	Knobloch syndrome	Reactome	1571	H7BXV5:H7C457:P39060	NP_085059.2:NP_569712.2
Core matrisome	Collagens	COL18A1	collagen, type XVIII, alpha 1	2195	Knobloch syndrome	SwissProt	1571	H7BXV5:H7C457:P39060	NP_085059.2:NP_569712.2
Core matrisome	Collagens	COL18A1	collagen, type XVIII, alpha 1	2195	Knobloch syndrome	NA	1571	H7BXV5:H7C457:P39060	NP_085059.2:NP_569712.2
Core matrisome	Collagens	COL1A1	collagen, type I, alpha 1	2197	Caffey disease	NA	1310	I3L3H7:P02452	NP_000079.2
Core matrisome	Collagens	COL1A1	collagen, type I, alpha 1	2197	Caffey disease	Genatlas	1310	I3L3H7:P02452	NP_000079.2
Core matrisome	Collagens	COL1A1	collagen, type I, alpha 1	2197	Caffey disease	HGNC	1310	I3L3H7:P02452	NP_000079.2
Core matrisome	Collagens	COL1A1	collagen, type I, alpha 1	2197	Caffey disease	OMIM	1310	I3L3H7:P02452	NP_000079.2
Core matrisome	Collagens	COL1A1	collagen, type I, alpha 1	2197	Caffey disease	Reactome	1310	I3L3H7:P02452	NP_000079.2
Core matrisome	Collagens	COL1A1	collagen, type I, alpha 1	2197	Caffey disease	SwissProt	1310	I3L3H7:P02452	NP_000079.2
Core matrisome	Collagens	COL1A1	collagen, type I, alpha 1	2197	Caffey disease	NA	1310	I3L3H7:P02452	NP_000079.2
Core matrisome	Collagens	COL1A1	collagen, type I, alpha 1	2197	Caffey disease	Ensembl	1310	I3L3H7:P02452	NP_000079.2
Core matrisome	Collagens	COL1A1	collagen, type I, alpha 1	2197	Dermatofibrosarcoma protuberans	Ensembl	31112	I3L3H7:P02452	NP_000079.2
Core matrisome	Collagens	COL1A1	collagen, type I, alpha 1	2197	Dermatofibrosarcoma protuberans	NA	31112	I3L3H7:P02452	NP_000079.2
Core matrisome	Collagens	COL1A1	collagen, type I, alpha 1	2197	Dermatofibrosarcoma protuberans	Genatlas	31112	I3L3H7:P02452	NP_000079.2
Core matrisome	Collagens	COL1A1	collagen, type I, alpha 1	2197	Dermatofibrosarcoma protuberans	HGNC	31112	I3L3H7:P02452	NP_000079.2
Core matrisome	Collagens	COL1A1	collagen, type I, alpha 1	2197	Dermatofibrosarcoma protuberans	OMIM	31112	I3L3H7:P02452	NP_000079.2
Core matrisome	Collagens	COL1A1	collagen, type I, alpha 1	2197	Dermatofibrosarcoma protuberans	Reactome	31112	I3L3H7:P02452	NP_000079.2
Core matrisome	Collagens	COL1A1	collagen, type I, alpha 1	2197	Dermatofibrosarcoma protuberans	SwissProt	31112	I3L3H7:P02452	NP_000079.2
Core matrisome	Collagens	COL1A1	collagen, type I, alpha 1	2197	Dermatofibrosarcoma protuberans	NA	31112	I3L3H7:P02452	NP_000079.2
Core matrisome	Collagens	COL1A1	collagen, type I, alpha 1	2197	Ehlers-Danlos syndrome type 1	Ensembl	90309	I3L3H7:P02452	NP_000079.2
Core matrisome	Collagens	COL1A1	collagen, type I, alpha 1	2197	Ehlers-Danlos syndrome type 1	NA	90309	I3L3H7:P02452	NP_000079.2
Core matrisome	Collagens	COL1A1	collagen, type I, alpha 1	2197	Ehlers-Danlos syndrome type 1	Genatlas	90309	I3L3H7:P02452	NP_000079.2
Core matrisome	Collagens	COL1A1	collagen, type I, alpha 1	2197	Ehlers-Danlos syndrome type 1	HGNC	90309	I3L3H7:P02452	NP_000079.2
Core matrisome	Collagens	COL1A1	collagen, type I, alpha 1	2197	Ehlers-Danlos syndrome type 1	OMIM	90309	I3L3H7:P02452	NP_000079.2
Core matrisome	Collagens	COL1A1	collagen, type I, alpha 1	2197	Ehlers-Danlos syndrome type 1	Reactome	90309	I3L3H7:P02452	NP_000079.2
Core matrisome	Collagens	COL1A1	collagen, type I, alpha 1	2197	Ehlers-Danlos syndrome type 1	SwissProt	90309	I3L3H7:P02452	NP_000079.2
Core matrisome	Collagens	COL1A1	collagen, type I, alpha 1	2197	Ehlers-Danlos syndrome type 1	NA	90309	I3L3H7:P02452	NP_000079.2
Core matrisome	Collagens	COL1A1	collagen, type I, alpha 1	2197	Ehlers-Danlos syndrome type 2	Ensembl	90318	I3L3H7:P02452	NP_000079.2
Core matrisome	Collagens	COL1A1	collagen, type I, alpha 1	2197	Ehlers-Danlos syndrome type 2	NA	90318	I3L3H7:P02452	NP_000079.2
Core matrisome	Collagens	COL1A1	collagen, type I, alpha 1	2197	Ehlers-Danlos syndrome type 2	Genatlas	90318	I3L3H7:P02452	NP_000079.2
Core matrisome	Collagens	COL1A1	collagen, type I, alpha 1	2197	Ehlers-Danlos syndrome type 2	HGNC	90318	I3L3H7:P02452	NP_000079.2
Core matrisome	Collagens	COL1A1	collagen, type I, alpha 1	2197	Ehlers-Danlos syndrome type 2	OMIM	90318	I3L3H7:P02452	NP_000079.2
Core matrisome	Collagens	COL1A1	collagen, type I, alpha 1	2197	Ehlers-Danlos syndrome type 2	Reactome	90318	I3L3H7:P02452	NP_000079.2
Core matrisome	Collagens	COL1A1	collagen, type I, alpha 1	2197	Ehlers-Danlos syndrome type 2	SwissProt	90318	I3L3H7:P02452	NP_000079.2
Core matrisome	Collagens	COL1A1	collagen, type I, alpha 1	2197	Ehlers-Danlos syndrome type 2	NA	90318	I3L3H7:P02452	NP_000079.2
Core matrisome	Collagens	COL1A1	collagen, type I, alpha 1	2197	Ehlers-Danlos syndrome type 7A	Ensembl	99875	I3L3H7:P02452	NP_000079.2
Core matrisome	Collagens	COL1A1	collagen, type I, alpha 1	2197	Ehlers-Danlos syndrome type 7A	NA	99875	I3L3H7:P02452	NP_000079.2
Core matrisome	Collagens	COL1A1	collagen, type I, alpha 1	2197	Ehlers-Danlos syndrome type 7A	Genatlas	99875	I3L3H7:P02452	NP_000079.2
Core matrisome	Collagens	COL1A1	collagen, type I, alpha 1	2197	Ehlers-Danlos syndrome type 7A	HGNC	99875	I3L3H7:P02452	NP_000079.2
Core matrisome	Collagens	COL1A1	collagen, type I, alpha 1	2197	Ehlers-Danlos syndrome type 7A	OMIM	99875	I3L3H7:P02452	NP_000079.2
Core matrisome	Collagens	COL1A1	collagen, type I, alpha 1	2197	Ehlers-Danlos syndrome type 7A	Reactome	99875	I3L3H7:P02452	NP_000079.2
Core matrisome	Collagens	COL1A1	collagen, type I, alpha 1	2197	Ehlers-Danlos syndrome type 7A	SwissProt	99875	I3L3H7:P02452	NP_000079.2
Core matrisome	Collagens	COL1A1	collagen, type I, alpha 1	2197	Ehlers-Danlos syndrome type 7A	NA	99875	I3L3H7:P02452	NP_000079.2
Core matrisome	Collagens	COL1A1	collagen, type I, alpha 1	2197	Ehlers-Danlos syndrome, vascular-like type	Ensembl	230845	I3L3H7:P02452	NP_000079.2
Core matrisome	Collagens	COL1A1	collagen, type I, alpha 1	2197	Ehlers-Danlos syndrome, vascular-like type	NA	230845	I3L3H7:P02452	NP_000079.2
Core matrisome	Collagens	COL1A1	collagen, type I, alpha 1	2197	Ehlers-Danlos syndrome, vascular-like type	Genatlas	230845	I3L3H7:P02452	NP_000079.2
Core matrisome	Collagens	COL1A1	collagen, type I, alpha 1	2197	Ehlers-Danlos syndrome, vascular-like type	HGNC	230845	I3L3H7:P02452	NP_000079.2
Core matrisome	Collagens	COL1A1	collagen, type I, alpha 1	2197	Ehlers-Danlos syndrome, vascular-like type	OMIM	230845	I3L3H7:P02452	NP_000079.2
Core matrisome	Collagens	COL1A1	collagen, type I, alpha 1	2197	Ehlers-Danlos syndrome, vascular-like type	Reactome	230845	I3L3H7:P02452	NP_000079.2
Core matrisome	Collagens	COL1A1	collagen, type I, alpha 1	2197	Ehlers-Danlos syndrome, vascular-like type	SwissProt	230845	I3L3H7:P02452	NP_000079.2
Core matrisome	Collagens	COL1A1	collagen, type I, alpha 1	2197	Ehlers-Danlos syndrome, vascular-like type	NA	230845	I3L3H7:P02452	NP_000079.2
Core matrisome	Collagens	COL1A1	collagen, type I, alpha 1	2197	Ehlers-Danlos/osteogenesis imperfecta syndrome	Ensembl	230857	I3L3H7:P02452	NP_000079.2
Core matrisome	Collagens	COL1A1	collagen, type I, alpha 1	2197	Ehlers-Danlos/osteogenesis imperfecta syndrome	NA	230857	I3L3H7:P02452	NP_000079.2
Core matrisome	Collagens	COL1A1	collagen, type I, alpha 1	2197	Ehlers-Danlos/osteogenesis imperfecta syndrome	Genatlas	230857	I3L3H7:P02452	NP_000079.2
Core matrisome	Collagens	COL1A1	collagen, type I, alpha 1	2197	Ehlers-Danlos/osteogenesis imperfecta syndrome	HGNC	230857	I3L3H7:P02452	NP_000079.2
Core matrisome	Collagens	COL1A1	collagen, type I, alpha 1	2197	Ehlers-Danlos/osteogenesis imperfecta syndrome	OMIM	230857	I3L3H7:P02452	NP_000079.2
Core matrisome	Collagens	COL1A1	collagen, type I, alpha 1	2197	Ehlers-Danlos/osteogenesis imperfecta syndrome	Reactome	230857	I3L3H7:P02452	NP_000079.2
Core matrisome	Collagens	COL1A1	collagen, type I, alpha 1	2197	Ehlers-Danlos/osteogenesis imperfecta syndrome	SwissProt	230857	I3L3H7:P02452	NP_000079.2
Core matrisome	Collagens	COL1A1	collagen, type I, alpha 1	2197	Ehlers-Danlos/osteogenesis imperfecta syndrome	NA	230857	I3L3H7:P02452	NP_000079.2
Core matrisome	Collagens	COL1A1	collagen, type I, alpha 1	2197	High bone mass osteogenesis imperfecta	Ensembl	314029	I3L3H7:P02452	NP_000079.2
Core matrisome	Collagens	COL1A1	collagen, type I, alpha 1	2197	High bone mass osteogenesis imperfecta	NA	314029	I3L3H7:P02452	NP_000079.2
Core matrisome	Collagens	COL1A1	collagen, type I, alpha 1	2197	High bone mass osteogenesis imperfecta	Genatlas	314029	I3L3H7:P02452	NP_000079.2
Core matrisome	Collagens	COL1A1	collagen, type I, alpha 1	2197	High bone mass osteogenesis imperfecta	HGNC	314029	I3L3H7:P02452	NP_000079.2
Core matrisome	Collagens	COL1A1	collagen, type I, alpha 1	2197	High bone mass osteogenesis imperfecta	OMIM	314029	I3L3H7:P02452	NP_000079.2
Core matrisome	Collagens	COL1A1	collagen, type I, alpha 1	2197	High bone mass osteogenesis imperfecta	Reactome	314029	I3L3H7:P02452	NP_000079.2
Core matrisome	Collagens	COL1A1	collagen, type I, alpha 1	2197	High bone mass osteogenesis imperfecta	SwissProt	314029	I3L3H7:P02452	NP_000079.2
Core matrisome	Collagens	COL1A1	collagen, type I, alpha 1	2197	High bone mass osteogenesis imperfecta	NA	314029	I3L3H7:P02452	NP_000079.2
Core matrisome	Collagens	COL1A1	collagen, type I, alpha 1	2197	Osteogenesis imperfecta type 1	Ensembl	216796	I3L3H7:P02452	NP_000079.2
Core matrisome	Collagens	COL1A1	collagen, type I, alpha 1	2197	Osteogenesis imperfecta type 1	NA	216796	I3L3H7:P02452	NP_000079.2
Core matrisome	Collagens	COL1A1	collagen, type I, alpha 1	2197	Osteogenesis imperfecta type 1	Genatlas	216796	I3L3H7:P02452	NP_000079.2
Core matrisome	Collagens	COL1A1	collagen, type I, alpha 1	2197	Osteogenesis imperfecta type 1	HGNC	216796	I3L3H7:P02452	NP_000079.2
Core matrisome	Collagens	COL1A1	collagen, type I, alpha 1	2197	Osteogenesis imperfecta type 1	OMIM	216796	I3L3H7:P02452	NP_000079.2
Core matrisome	Collagens	COL1A1	collagen, type I, alpha 1	2197	Osteogenesis imperfecta type 1	Reactome	216796	I3L3H7:P02452	NP_000079.2
Core matrisome	Collagens	COL1A1	collagen, type I, alpha 1	2197	Osteogenesis imperfecta type 1	SwissProt	216796	I3L3H7:P02452	NP_000079.2
Core matrisome	Collagens	COL1A1	collagen, type I, alpha 1	2197	Osteogenesis imperfecta type 1	NA	216796	I3L3H7:P02452	NP_000079.2
Core matrisome	Collagens	COL1A1	collagen, type I, alpha 1	2197	Osteogenesis imperfecta type 2	Ensembl	216804	I3L3H7:P02452	NP_000079.2
Core matrisome	Collagens	COL1A1	collagen, type I, alpha 1	2197	Osteogenesis imperfecta type 2	NA	216804	I3L3H7:P02452	NP_000079.2
Core matrisome	Collagens	COL1A1	collagen, type I, alpha 1	2197	Osteogenesis imperfecta type 2	Genatlas	216804	I3L3H7:P02452	NP_000079.2
Core matrisome	Collagens	COL1A1	collagen, type I, alpha 1	2197	Osteogenesis imperfecta type 2	HGNC	216804	I3L3H7:P02452	NP_000079.2
Core matrisome	Collagens	COL1A1	collagen, type I, alpha 1	2197	Osteogenesis imperfecta type 2	OMIM	216804	I3L3H7:P02452	NP_000079.2
Core matrisome	Collagens	COL1A1	collagen, type I, alpha 1	2197	Osteogenesis imperfecta type 2	Reactome	216804	I3L3H7:P02452	NP_000079.2
Core matrisome	Collagens	COL1A1	collagen, type I, alpha 1	2197	Osteogenesis imperfecta type 2	SwissProt	216804	I3L3H7:P02452	NP_000079.2
Core matrisome	Collagens	COL1A1	collagen, type I, alpha 1	2197	Osteogenesis imperfecta type 2	NA	216804	I3L3H7:P02452	NP_000079.2
Core matrisome	Collagens	COL1A1	collagen, type I, alpha 1	2197	Osteogenesis imperfecta type 3	Ensembl	216812	I3L3H7:P02452	NP_000079.2
Core matrisome	Collagens	COL1A1	collagen, type I, alpha 1	2197	Osteogenesis imperfecta type 3	NA	216812	I3L3H7:P02452	NP_000079.2
Core matrisome	Collagens	COL1A1	collagen, type I, alpha 1	2197	Osteogenesis imperfecta type 3	Genatlas	216812	I3L3H7:P02452	NP_000079.2
Core matrisome	Collagens	COL1A1	collagen, type I, alpha 1	2197	Osteogenesis imperfecta type 3	HGNC	216812	I3L3H7:P02452	NP_000079.2
Core matrisome	Collagens	COL1A1	collagen, type I, alpha 1	2197	Osteogenesis imperfecta type 3	OMIM	216812	I3L3H7:P02452	NP_000079.2
Core matrisome	Collagens	COL1A1	collagen, type I, alpha 1	2197	Osteogenesis imperfecta type 3	Reactome	216812	I3L3H7:P02452	NP_000079.2
Core matrisome	Collagens	COL1A1	collagen, type I, alpha 1	2197	Osteogenesis imperfecta type 3	SwissProt	216812	I3L3H7:P02452	NP_000079.2
Core matrisome	Collagens	COL1A1	collagen, type I, alpha 1	2197	Osteogenesis imperfecta type 3	NA	216812	I3L3H7:P02452	NP_000079.2
Core matrisome	Collagens	COL1A1	collagen, type I, alpha 1	2197	Osteogenesis imperfecta type 4	Ensembl	216820	I3L3H7:P02452	NP_000079.2
Core matrisome	Collagens	COL1A1	collagen, type I, alpha 1	2197	Osteogenesis imperfecta type 4	NA	216820	I3L3H7:P02452	NP_000079.2
Core matrisome	Collagens	COL1A1	collagen, type I, alpha 1	2197	Osteogenesis imperfecta type 4	Genatlas	216820	I3L3H7:P02452	NP_000079.2
Core matrisome	Collagens	COL1A1	collagen, type I, alpha 1	2197	Osteogenesis imperfecta type 4	HGNC	216820	I3L3H7:P02452	NP_000079.2
Core matrisome	Collagens	COL1A1	collagen, type I, alpha 1	2197	Osteogenesis imperfecta type 4	OMIM	216820	I3L3H7:P02452	NP_000079.2
Core matrisome	Collagens	COL1A1	collagen, type I, alpha 1	2197	Osteogenesis imperfecta type 4	Reactome	216820	I3L3H7:P02452	NP_000079.2
Core matrisome	Collagens	COL1A1	collagen, type I, alpha 1	2197	Osteogenesis imperfecta type 4	SwissProt	216820	I3L3H7:P02452	NP_000079.2
Core matrisome	Collagens	COL1A1	collagen, type I, alpha 1	2197	Osteogenesis imperfecta type 4	NA	216820	I3L3H7:P02452	NP_000079.2
Core matrisome	Collagens	COL1A2	collagen, type I, alpha 2	2198	Ehlers-Danlos syndrome type 7B	Ensembl	99876	P08123	NP_000080.2
Core matrisome	Collagens	COL1A2	collagen, type I, alpha 2	2198	Ehlers-Danlos syndrome type 7B	NA	99876	P08123	NP_000080.2
Core matrisome	Collagens	COL1A2	collagen, type I, alpha 2	2198	Ehlers-Danlos syndrome type 7B	NA	99876	P08123	NP_000080.2
Core matrisome	Collagens	COL1A2	collagen, type I, alpha 2	2198	Ehlers-Danlos syndrome type 7B	NA	99876	P08123	NP_000080.2
Core matrisome	Collagens	COL1A2	collagen, type I, alpha 2	2198	Ehlers-Danlos syndrome type 7B	NA	99876	P08123	NP_000080.2
Core matrisome	Collagens	COL1A2	collagen, type I, alpha 2	2198	Ehlers-Danlos syndrome type 7B	NA	99876	P08123	NP_000080.2
Core matrisome	Collagens	COL1A2	collagen, type I, alpha 2	2198	Ehlers-Danlos syndrome type 7B	OMIM	99876	P08123	NP_000080.2
Core matrisome	Collagens	COL1A2	collagen, type I, alpha 2	2198	Ehlers-Danlos syndrome type 7B	Reactome	99876	P08123	NP_000080.2
Core matrisome	Collagens	COL1A2	collagen, type I, alpha 2	2198	Ehlers-Danlos syndrome type 7B	SwissProt	99876	P08123	NP_000080.2
Core matrisome	Collagens	COL1A2	collagen, type I, alpha 2	2198	Ehlers-Danlos syndrome type 7B	Genatlas	99876	P08123	NP_000080.2
Core matrisome	Collagens	COL1A2	collagen, type I, alpha 2	2198	Ehlers-Danlos syndrome type 7B	HGNC	99876	P08123	NP_000080.2
Core matrisome	Collagens	COL1A2	collagen, type I, alpha 2	2198	Ehlers-Danlos syndrome type 7B	NA	99876	P08123	NP_000080.2
Core matrisome	Collagens	COL1A2	collagen, type I, alpha 2	2198	Ehlers-Danlos syndrome, cardiac valvular type	Ensembl	230851	P08123	NP_000080.2
Core matrisome	Collagens	COL1A2	collagen, type I, alpha 2	2198	Ehlers-Danlos syndrome, cardiac valvular type	NA	230851	P08123	NP_000080.2
Core matrisome	Collagens	COL1A2	collagen, type I, alpha 2	2198	Ehlers-Danlos syndrome, cardiac valvular type	NA	230851	P08123	NP_000080.2
Core matrisome	Collagens	COL1A2	collagen, type I, alpha 2	2198	Ehlers-Danlos syndrome, cardiac valvular type	NA	230851	P08123	NP_000080.2
Core matrisome	Collagens	COL1A2	collagen, type I, alpha 2	2198	Ehlers-Danlos syndrome, cardiac valvular type	NA	230851	P08123	NP_000080.2
Core matrisome	Collagens	COL1A2	collagen, type I, alpha 2	2198	Ehlers-Danlos syndrome, cardiac valvular type	NA	230851	P08123	NP_000080.2
Core matrisome	Collagens	COL1A2	collagen, type I, alpha 2	2198	Ehlers-Danlos syndrome, cardiac valvular type	OMIM	230851	P08123	NP_000080.2
Core matrisome	Collagens	COL1A2	collagen, type I, alpha 2	2198	Ehlers-Danlos syndrome, cardiac valvular type	Reactome	230851	P08123	NP_000080.2
Core matrisome	Collagens	COL1A2	collagen, type I, alpha 2	2198	Ehlers-Danlos syndrome, cardiac valvular type	SwissProt	230851	P08123	NP_000080.2
Core matrisome	Collagens	COL1A2	collagen, type I, alpha 2	2198	Ehlers-Danlos syndrome, cardiac valvular type	Genatlas	230851	P08123	NP_000080.2
Core matrisome	Collagens	COL1A2	collagen, type I, alpha 2	2198	Ehlers-Danlos syndrome, cardiac valvular type	HGNC	230851	P08123	NP_000080.2
Core matrisome	Collagens	COL1A2	collagen, type I, alpha 2	2198	Ehlers-Danlos syndrome, cardiac valvular type	NA	230851	P08123	NP_000080.2
Core matrisome	Collagens	COL1A2	collagen, type I, alpha 2	2198	Ehlers-Danlos/osteogenesis imperfecta syndrome	Ensembl	230857	P08123	NP_000080.2
Core matrisome	Collagens	COL1A2	collagen, type I, alpha 2	2198	Ehlers-Danlos/osteogenesis imperfecta syndrome	NA	230857	P08123	NP_000080.2
Core matrisome	Collagens	COL1A2	collagen, type I, alpha 2	2198	Ehlers-Danlos/osteogenesis imperfecta syndrome	NA	230857	P08123	NP_000080.2
Core matrisome	Collagens	COL1A2	collagen, type I, alpha 2	2198	Ehlers-Danlos/osteogenesis imperfecta syndrome	NA	230857	P08123	NP_000080.2
Core matrisome	Collagens	COL1A2	collagen, type I, alpha 2	2198	Ehlers-Danlos/osteogenesis imperfecta syndrome	NA	230857	P08123	NP_000080.2
Core matrisome	Collagens	COL1A2	collagen, type I, alpha 2	2198	Ehlers-Danlos/osteogenesis imperfecta syndrome	NA	230857	P08123	NP_000080.2
Core matrisome	Collagens	COL1A2	collagen, type I, alpha 2	2198	Ehlers-Danlos/osteogenesis imperfecta syndrome	OMIM	230857	P08123	NP_000080.2
Core matrisome	Collagens	COL1A2	collagen, type I, alpha 2	2198	Ehlers-Danlos/osteogenesis imperfecta syndrome	Reactome	230857	P08123	NP_000080.2
Core matrisome	Collagens	COL1A2	collagen, type I, alpha 2	2198	Ehlers-Danlos/osteogenesis imperfecta syndrome	SwissProt	230857	P08123	NP_000080.2
Core matrisome	Collagens	COL1A2	collagen, type I, alpha 2	2198	Ehlers-Danlos/osteogenesis imperfecta syndrome	Genatlas	230857	P08123	NP_000080.2
Core matrisome	Collagens	COL1A2	collagen, type I, alpha 2	2198	Ehlers-Danlos/osteogenesis imperfecta syndrome	HGNC	230857	P08123	NP_000080.2
Core matrisome	Collagens	COL1A2	collagen, type I, alpha 2	2198	Ehlers-Danlos/osteogenesis imperfecta syndrome	NA	230857	P08123	NP_000080.2
Core matrisome	Collagens	COL1A2	collagen, type I, alpha 2	2198	High bone mass osteogenesis imperfecta	Ensembl	314029	P08123	NP_000080.2
Core matrisome	Collagens	COL1A2	collagen, type I, alpha 2	2198	High bone mass osteogenesis imperfecta	NA	314029	P08123	NP_000080.2
Core matrisome	Collagens	COL1A2	collagen, type I, alpha 2	2198	High bone mass osteogenesis imperfecta	NA	314029	P08123	NP_000080.2
Core matrisome	Collagens	COL1A2	collagen, type I, alpha 2	2198	High bone mass osteogenesis imperfecta	NA	314029	P08123	NP_000080.2
Core matrisome	Collagens	COL1A2	collagen, type I, alpha 2	2198	High bone mass osteogenesis imperfecta	NA	314029	P08123	NP_000080.2
Core matrisome	Collagens	COL1A2	collagen, type I, alpha 2	2198	High bone mass osteogenesis imperfecta	NA	314029	P08123	NP_000080.2
Core matrisome	Collagens	COL1A2	collagen, type I, alpha 2	2198	High bone mass osteogenesis imperfecta	OMIM	314029	P08123	NP_000080.2
Core matrisome	Collagens	COL1A2	collagen, type I, alpha 2	2198	High bone mass osteogenesis imperfecta	Reactome	314029	P08123	NP_000080.2
Core matrisome	Collagens	COL1A2	collagen, type I, alpha 2	2198	High bone mass osteogenesis imperfecta	SwissProt	314029	P08123	NP_000080.2
Core matrisome	Collagens	COL1A2	collagen, type I, alpha 2	2198	High bone mass osteogenesis imperfecta	Genatlas	314029	P08123	NP_000080.2
Core matrisome	Collagens	COL1A2	collagen, type I, alpha 2	2198	High bone mass osteogenesis imperfecta	HGNC	314029	P08123	NP_000080.2
Core matrisome	Collagens	COL1A2	collagen, type I, alpha 2	2198	High bone mass osteogenesis imperfecta	NA	314029	P08123	NP_000080.2
Core matrisome	Collagens	COL1A2	collagen, type I, alpha 2	2198	Osteogenesis imperfecta type 1	Ensembl	216796	P08123	NP_000080.2
Core matrisome	Collagens	COL1A2	collagen, type I, alpha 2	2198	Osteogenesis imperfecta type 1	NA	216796	P08123	NP_000080.2
Core matrisome	Collagens	COL1A2	collagen, type I, alpha 2	2198	Osteogenesis imperfecta type 1	NA	216796	P08123	NP_000080.2
Core matrisome	Collagens	COL1A2	collagen, type I, alpha 2	2198	Osteogenesis imperfecta type 1	NA	216796	P08123	NP_000080.2
Core matrisome	Collagens	COL1A2	collagen, type I, alpha 2	2198	Osteogenesis imperfecta type 1	NA	216796	P08123	NP_000080.2
Core matrisome	Collagens	COL1A2	collagen, type I, alpha 2	2198	Osteogenesis imperfecta type 1	NA	216796	P08123	NP_000080.2
Core matrisome	Collagens	COL1A2	collagen, type I, alpha 2	2198	Osteogenesis imperfecta type 1	OMIM	216796	P08123	NP_000080.2
Core matrisome	Collagens	COL1A2	collagen, type I, alpha 2	2198	Osteogenesis imperfecta type 1	Reactome	216796	P08123	NP_000080.2
Core matrisome	Collagens	COL1A2	collagen, type I, alpha 2	2198	Osteogenesis imperfecta type 1	SwissProt	216796	P08123	NP_000080.2
Core matrisome	Collagens	COL1A2	collagen, type I, alpha 2	2198	Osteogenesis imperfecta type 1	Genatlas	216796	P08123	NP_000080.2
Core matrisome	Collagens	COL1A2	collagen, type I, alpha 2	2198	Osteogenesis imperfecta type 1	HGNC	216796	P08123	NP_000080.2
Core matrisome	Collagens	COL1A2	collagen, type I, alpha 2	2198	Osteogenesis imperfecta type 1	NA	216796	P08123	NP_000080.2
Core matrisome	Collagens	COL1A2	collagen, type I, alpha 2	2198	Osteogenesis imperfecta type 2	Ensembl	216804	P08123	NP_000080.2
Core matrisome	Collagens	COL1A2	collagen, type I, alpha 2	2198	Osteogenesis imperfecta type 2	NA	216804	P08123	NP_000080.2
Core matrisome	Collagens	COL1A2	collagen, type I, alpha 2	2198	Osteogenesis imperfecta type 2	NA	216804	P08123	NP_000080.2
Core matrisome	Collagens	COL1A2	collagen, type I, alpha 2	2198	Osteogenesis imperfecta type 2	NA	216804	P08123	NP_000080.2
Core matrisome	Collagens	COL1A2	collagen, type I, alpha 2	2198	Osteogenesis imperfecta type 2	NA	216804	P08123	NP_000080.2
Core matrisome	Collagens	COL1A2	collagen, type I, alpha 2	2198	Osteogenesis imperfecta type 2	NA	216804	P08123	NP_000080.2
Core matrisome	Collagens	COL1A2	collagen, type I, alpha 2	2198	Osteogenesis imperfecta type 2	OMIM	216804	P08123	NP_000080.2
Core matrisome	Collagens	COL1A2	collagen, type I, alpha 2	2198	Osteogenesis imperfecta type 2	Reactome	216804	P08123	NP_000080.2
Core matrisome	Collagens	COL1A2	collagen, type I, alpha 2	2198	Osteogenesis imperfecta type 2	SwissProt	216804	P08123	NP_000080.2
Core matrisome	Collagens	COL1A2	collagen, type I, alpha 2	2198	Osteogenesis imperfecta type 2	Genatlas	216804	P08123	NP_000080.2
Core matrisome	Collagens	COL1A2	collagen, type I, alpha 2	2198	Osteogenesis imperfecta type 2	HGNC	216804	P08123	NP_000080.2
Core matrisome	Collagens	COL1A2	collagen, type I, alpha 2	2198	Osteogenesis imperfecta type 2	NA	216804	P08123	NP_000080.2
Core matrisome	Collagens	COL1A2	collagen, type I, alpha 2	2198	Osteogenesis imperfecta type 3	Ensembl	216812	P08123	NP_000080.2
Core matrisome	Collagens	COL1A2	collagen, type I, alpha 2	2198	Osteogenesis imperfecta type 3	NA	216812	P08123	NP_000080.2
Core matrisome	Collagens	COL1A2	collagen, type I, alpha 2	2198	Osteogenesis imperfecta type 3	NA	216812	P08123	NP_000080.2
Core matrisome	Collagens	COL1A2	collagen, type I, alpha 2	2198	Osteogenesis imperfecta type 3	NA	216812	P08123	NP_000080.2
Core matrisome	Collagens	COL1A2	collagen, type I, alpha 2	2198	Osteogenesis imperfecta type 3	NA	216812	P08123	NP_000080.2
Core matrisome	Collagens	COL1A2	collagen, type I, alpha 2	2198	Osteogenesis imperfecta type 3	NA	216812	P08123	NP_000080.2
Core matrisome	Collagens	COL1A2	collagen, type I, alpha 2	2198	Osteogenesis imperfecta type 3	OMIM	216812	P08123	NP_000080.2
Core matrisome	Collagens	COL1A2	collagen, type I, alpha 2	2198	Osteogenesis imperfecta type 3	Reactome	216812	P08123	NP_000080.2
Core matrisome	Collagens	COL1A2	collagen, type I, alpha 2	2198	Osteogenesis imperfecta type 3	SwissProt	216812	P08123	NP_000080.2
Core matrisome	Collagens	COL1A2	collagen, type I, alpha 2	2198	Osteogenesis imperfecta type 3	Genatlas	216812	P08123	NP_000080.2
Core matrisome	Collagens	COL1A2	collagen, type I, alpha 2	2198	Osteogenesis imperfecta type 3	HGNC	216812	P08123	NP_000080.2
Core matrisome	Collagens	COL1A2	collagen, type I, alpha 2	2198	Osteogenesis imperfecta type 3	NA	216812	P08123	NP_000080.2
Core matrisome	Collagens	COL1A2	collagen, type I, alpha 2	2198	Osteogenesis imperfecta type 4	Ensembl	216820	P08123	NP_000080.2
Core matrisome	Collagens	COL1A2	collagen, type I, alpha 2	2198	Osteogenesis imperfecta type 4	NA	216820	P08123	NP_000080.2
Core matrisome	Collagens	COL1A2	collagen, type I, alpha 2	2198	Osteogenesis imperfecta type 4	NA	216820	P08123	NP_000080.2
Core matrisome	Collagens	COL1A2	collagen, type I, alpha 2	2198	Osteogenesis imperfecta type 4	NA	216820	P08123	NP_000080.2
Core matrisome	Collagens	COL1A2	collagen, type I, alpha 2	2198	Osteogenesis imperfecta type 4	NA	216820	P08123	NP_000080.2
Core matrisome	Collagens	COL1A2	collagen, type I, alpha 2	2198	Osteogenesis imperfecta type 4	NA	216820	P08123	NP_000080.2
Core matrisome	Collagens	COL1A2	collagen, type I, alpha 2	2198	Osteogenesis imperfecta type 4	OMIM	216820	P08123	NP_000080.2
Core matrisome	Collagens	COL1A2	collagen, type I, alpha 2	2198	Osteogenesis imperfecta type 4	Reactome	216820	P08123	NP_000080.2
Core matrisome	Collagens	COL1A2	collagen, type I, alpha 2	2198	Osteogenesis imperfecta type 4	SwissProt	216820	P08123	NP_000080.2
Core matrisome	Collagens	COL1A2	collagen, type I, alpha 2	2198	Osteogenesis imperfecta type 4	Genatlas	216820	P08123	NP_000080.2
Core matrisome	Collagens	COL1A2	collagen, type I, alpha 2	2198	Osteogenesis imperfecta type 4	HGNC	216820	P08123	NP_000080.2
Core matrisome	Collagens	COL1A2	collagen, type I, alpha 2	2198	Osteogenesis imperfecta type 4	NA	216820	P08123	NP_000080.2
Core matrisome	Collagens	COL25A1	collagen, type XXV, alpha 1	18603	Congenital ptosis	NA	91411	A8MWQ5:D6R8Y2:E9PNV9:H0YAE1:Q9BXS0	NP_001243003.1:NP_115907.2:NP_942014.1
Core matrisome	Collagens	COL25A1	collagen, type XXV, alpha 1	18603	Congenital ptosis	Genatlas	91411	A8MWQ5:D6R8Y2:E9PNV9:H0YAE1:Q9BXS0	NP_001243003.1:NP_115907.2:NP_942014.1
Core matrisome	Collagens	COL25A1	collagen, type XXV, alpha 1	18603	Congenital ptosis	HGNC	91411	A8MWQ5:D6R8Y2:E9PNV9:H0YAE1:Q9BXS0	NP_001243003.1:NP_115907.2:NP_942014.1
Core matrisome	Collagens	COL25A1	collagen, type XXV, alpha 1	18603	Congenital ptosis	OMIM	91411	A8MWQ5:D6R8Y2:E9PNV9:H0YAE1:Q9BXS0	NP_001243003.1:NP_115907.2:NP_942014.1
Core matrisome	Collagens	COL25A1	collagen, type XXV, alpha 1	18603	Congenital ptosis	Reactome	91411	A8MWQ5:D6R8Y2:E9PNV9:H0YAE1:Q9BXS0	NP_001243003.1:NP_115907.2:NP_942014.1
Core matrisome	Collagens	COL25A1	collagen, type XXV, alpha 1	18603	Congenital ptosis	SwissProt	91411	A8MWQ5:D6R8Y2:E9PNV9:H0YAE1:Q9BXS0	NP_001243003.1:NP_115907.2:NP_942014.1
Core matrisome	Collagens	COL25A1	collagen, type XXV, alpha 1	18603	Congenital ptosis	NA	91411	A8MWQ5:D6R8Y2:E9PNV9:H0YAE1:Q9BXS0	NP_001243003.1:NP_115907.2:NP_942014.1
Core matrisome	Collagens	COL25A1	collagen, type XXV, alpha 1	18603	Congenital ptosis	Ensembl	91411	A8MWQ5:D6R8Y2:E9PNV9:H0YAE1:Q9BXS0	NP_001243003.1:NP_115907.2:NP_942014.1
Core matrisome	Collagens	COL25A1	collagen, type XXV, alpha 1	18603	Duane retraction syndrome	NA	233	A8MWQ5:D6R8Y2:E9PNV9:H0YAE1:Q9BXS0	NP_001243003.1:NP_115907.2:NP_942014.1
Core matrisome	Collagens	COL25A1	collagen, type XXV, alpha 1	18603	Duane retraction syndrome	Genatlas	233	A8MWQ5:D6R8Y2:E9PNV9:H0YAE1:Q9BXS0	NP_001243003.1:NP_115907.2:NP_942014.1
Core matrisome	Collagens	COL25A1	collagen, type XXV, alpha 1	18603	Duane retraction syndrome	HGNC	233	A8MWQ5:D6R8Y2:E9PNV9:H0YAE1:Q9BXS0	NP_001243003.1:NP_115907.2:NP_942014.1
Core matrisome	Collagens	COL25A1	collagen, type XXV, alpha 1	18603	Duane retraction syndrome	OMIM	233	A8MWQ5:D6R8Y2:E9PNV9:H0YAE1:Q9BXS0	NP_001243003.1:NP_115907.2:NP_942014.1
Core matrisome	Collagens	COL25A1	collagen, type XXV, alpha 1	18603	Duane retraction syndrome	Reactome	233	A8MWQ5:D6R8Y2:E9PNV9:H0YAE1:Q9BXS0	NP_001243003.1:NP_115907.2:NP_942014.1
Core matrisome	Collagens	COL25A1	collagen, type XXV, alpha 1	18603	Duane retraction syndrome	SwissProt	233	A8MWQ5:D6R8Y2:E9PNV9:H0YAE1:Q9BXS0	NP_001243003.1:NP_115907.2:NP_942014.1
Core matrisome	Collagens	COL25A1	collagen, type XXV, alpha 1	18603	Duane retraction syndrome	NA	233	A8MWQ5:D6R8Y2:E9PNV9:H0YAE1:Q9BXS0	NP_001243003.1:NP_115907.2:NP_942014.1
Core matrisome	Collagens	COL25A1	collagen, type XXV, alpha 1	18603	Duane retraction syndrome	Ensembl	233	A8MWQ5:D6R8Y2:E9PNV9:H0YAE1:Q9BXS0	NP_001243003.1:NP_115907.2:NP_942014.1
Core matrisome	Collagens	COL27A1	collagen, type XXVII, alpha 1	22986	Steel syndrome	NA	438117	H0YD40:Q5T1U7:Q8IZC6	NP_116277.2
Core matrisome	Collagens	COL27A1	collagen, type XXVII, alpha 1	22986	Steel syndrome	NA	438117	H0YD40:Q5T1U7:Q8IZC6	NP_116277.2
Core matrisome	Collagens	COL27A1	collagen, type XXVII, alpha 1	22986	Steel syndrome	NA	438117	H0YD40:Q5T1U7:Q8IZC6	NP_116277.2
Core matrisome	Collagens	COL27A1	collagen, type XXVII, alpha 1	22986	Steel syndrome	OMIM	438117	H0YD40:Q5T1U7:Q8IZC6	NP_116277.2
Core matrisome	Collagens	COL27A1	collagen, type XXVII, alpha 1	22986	Steel syndrome	Reactome	438117	H0YD40:Q5T1U7:Q8IZC6	NP_116277.2
Core matrisome	Collagens	COL27A1	collagen, type XXVII, alpha 1	22986	Steel syndrome	SwissProt	438117	H0YD40:Q5T1U7:Q8IZC6	NP_116277.2
Core matrisome	Collagens	COL27A1	collagen, type XXVII, alpha 1	22986	Steel syndrome	Genatlas	438117	H0YD40:Q5T1U7:Q8IZC6	NP_116277.2
Core matrisome	Collagens	COL27A1	collagen, type XXVII, alpha 1	22986	Steel syndrome	HGNC	438117	H0YD40:Q5T1U7:Q8IZC6	NP_116277.2
Core matrisome	Collagens	COL27A1	collagen, type XXVII, alpha 1	22986	Steel syndrome	NA	438117	H0YD40:Q5T1U7:Q8IZC6	NP_116277.2
Core matrisome	Collagens	COL27A1	collagen, type XXVII, alpha 1	22986	Steel syndrome	Ensembl	438117	H0YD40:Q5T1U7:Q8IZC6	NP_116277.2
Core matrisome	Collagens	COL2A1	collagen, type II, alpha 1	2200	Achondrogenesis type 2	NA	93296	P02458	NP_001835.3:NP_149162.2
Core matrisome	Collagens	COL2A1	collagen, type II, alpha 1	2200	Achondrogenesis type 2	Genatlas	93296	P02458	NP_001835.3:NP_149162.2
Core matrisome	Collagens	COL2A1	collagen, type II, alpha 1	2200	Achondrogenesis type 2	HGNC	93296	P02458	NP_001835.3:NP_149162.2
Core matrisome	Collagens	COL2A1	collagen, type II, alpha 1	2200	Achondrogenesis type 2	OMIM	93296	P02458	NP_001835.3:NP_149162.2
Core matrisome	Collagens	COL2A1	collagen, type II, alpha 1	2200	Achondrogenesis type 2	Reactome	93296	P02458	NP_001835.3:NP_149162.2
Core matrisome	Collagens	COL2A1	collagen, type II, alpha 1	2200	Achondrogenesis type 2	SwissProt	93296	P02458	NP_001835.3:NP_149162.2
Core matrisome	Collagens	COL2A1	collagen, type II, alpha 1	2200	Achondrogenesis type 2	NA	93296	P02458	NP_001835.3:NP_149162.2
Core matrisome	Collagens	COL2A1	collagen, type II, alpha 1	2200	Achondrogenesis type 2	Ensembl	93296	P02458	NP_001835.3:NP_149162.2
Core matrisome	Collagens	COL2A1	collagen, type II, alpha 1	2200	Autosomal dominant rhegmatogenous retinal detachment	NA	209867	P02458	NP_001835.3:NP_149162.2
Core matrisome	Collagens	COL2A1	collagen, type II, alpha 1	2200	Autosomal dominant rhegmatogenous retinal detachment	Genatlas	209867	P02458	NP_001835.3:NP_149162.2
Core matrisome	Collagens	COL2A1	collagen, type II, alpha 1	2200	Autosomal dominant rhegmatogenous retinal detachment	HGNC	209867	P02458	NP_001835.3:NP_149162.2
Core matrisome	Collagens	COL2A1	collagen, type II, alpha 1	2200	Autosomal dominant rhegmatogenous retinal detachment	OMIM	209867	P02458	NP_001835.3:NP_149162.2
Core matrisome	Collagens	COL2A1	collagen, type II, alpha 1	2200	Autosomal dominant rhegmatogenous retinal detachment	Reactome	209867	P02458	NP_001835.3:NP_149162.2
Core matrisome	Collagens	COL2A1	collagen, type II, alpha 1	2200	Autosomal dominant rhegmatogenous retinal detachment	SwissProt	209867	P02458	NP_001835.3:NP_149162.2
Core matrisome	Collagens	COL2A1	collagen, type II, alpha 1	2200	Autosomal dominant rhegmatogenous retinal detachment	NA	209867	P02458	NP_001835.3:NP_149162.2
Core matrisome	Collagens	COL2A1	collagen, type II, alpha 1	2200	Autosomal dominant rhegmatogenous retinal detachment	Ensembl	209867	P02458	NP_001835.3:NP_149162.2
Core matrisome	Collagens	COL2A1	collagen, type II, alpha 1	2200	Czech dysplasia, metatarsal type	Ensembl	137678	P02458	NP_001835.3:NP_149162.2
Core matrisome	Collagens	COL2A1	collagen, type II, alpha 1	2200	Czech dysplasia, metatarsal type	NA	137678	P02458	NP_001835.3:NP_149162.2
Core matrisome	Collagens	COL2A1	collagen, type II, alpha 1	2200	Czech dysplasia, metatarsal type	Genatlas	137678	P02458	NP_001835.3:NP_149162.2
Core matrisome	Collagens	COL2A1	collagen, type II, alpha 1	2200	Czech dysplasia, metatarsal type	HGNC	137678	P02458	NP_001835.3:NP_149162.2
Core matrisome	Collagens	COL2A1	collagen, type II, alpha 1	2200	Czech dysplasia, metatarsal type	OMIM	137678	P02458	NP_001835.3:NP_149162.2
Core matrisome	Collagens	COL2A1	collagen, type II, alpha 1	2200	Czech dysplasia, metatarsal type	Reactome	137678	P02458	NP_001835.3:NP_149162.2
Core matrisome	Collagens	COL2A1	collagen, type II, alpha 1	2200	Czech dysplasia, metatarsal type	SwissProt	137678	P02458	NP_001835.3:NP_149162.2
Core matrisome	Collagens	COL2A1	collagen, type II, alpha 1	2200	Czech dysplasia, metatarsal type	NA	137678	P02458	NP_001835.3:NP_149162.2
Core matrisome	Collagens	COL2A1	collagen, type II, alpha 1	2200	Dysspondyloenchondromatosis	Ensembl	85198	P02458	NP_001835.3:NP_149162.2
Core matrisome	Collagens	COL2A1	collagen, type II, alpha 1	2200	Dysspondyloenchondromatosis	NA	85198	P02458	NP_001835.3:NP_149162.2
Core matrisome	Collagens	COL2A1	collagen, type II, alpha 1	2200	Dysspondyloenchondromatosis	Genatlas	85198	P02458	NP_001835.3:NP_149162.2
Core matrisome	Collagens	COL2A1	collagen, type II, alpha 1	2200	Dysspondyloenchondromatosis	HGNC	85198	P02458	NP_001835.3:NP_149162.2
Core matrisome	Collagens	COL2A1	collagen, type II, alpha 1	2200	Dysspondyloenchondromatosis	OMIM	85198	P02458	NP_001835.3:NP_149162.2
Core matrisome	Collagens	COL2A1	collagen, type II, alpha 1	2200	Dysspondyloenchondromatosis	Reactome	85198	P02458	NP_001835.3:NP_149162.2
Core matrisome	Collagens	COL2A1	collagen, type II, alpha 1	2200	Dysspondyloenchondromatosis	SwissProt	85198	P02458	NP_001835.3:NP_149162.2
Core matrisome	Collagens	COL2A1	collagen, type II, alpha 1	2200	Dysspondyloenchondromatosis	NA	85198	P02458	NP_001835.3:NP_149162.2
Core matrisome	Collagens	COL2A1	collagen, type II, alpha 1	2200	Familial avascular necrosis of femoral head	Ensembl	86820	P02458	NP_001835.3:NP_149162.2
Core matrisome	Collagens	COL2A1	collagen, type II, alpha 1	2200	Familial avascular necrosis of femoral head	NA	86820	P02458	NP_001835.3:NP_149162.2
Core matrisome	Collagens	COL2A1	collagen, type II, alpha 1	2200	Familial avascular necrosis of femoral head	Genatlas	86820	P02458	NP_001835.3:NP_149162.2
Core matrisome	Collagens	COL2A1	collagen, type II, alpha 1	2200	Familial avascular necrosis of femoral head	HGNC	86820	P02458	NP_001835.3:NP_149162.2
Core matrisome	Collagens	COL2A1	collagen, type II, alpha 1	2200	Familial avascular necrosis of femoral head	OMIM	86820	P02458	NP_001835.3:NP_149162.2
Core matrisome	Collagens	COL2A1	collagen, type II, alpha 1	2200	Familial avascular necrosis of femoral head	Reactome	86820	P02458	NP_001835.3:NP_149162.2
Core matrisome	Collagens	COL2A1	collagen, type II, alpha 1	2200	Familial avascular necrosis of femoral head	SwissProt	86820	P02458	NP_001835.3:NP_149162.2
Core matrisome	Collagens	COL2A1	collagen, type II, alpha 1	2200	Familial avascular necrosis of femoral head	NA	86820	P02458	NP_001835.3:NP_149162.2
Core matrisome	Collagens	COL2A1	collagen, type II, alpha 1	2200	Hypochondrogenesis	Ensembl	93297	P02458	NP_001835.3:NP_149162.2
Core matrisome	Collagens	COL2A1	collagen, type II, alpha 1	2200	Hypochondrogenesis	NA	93297	P02458	NP_001835.3:NP_149162.2
Core matrisome	Collagens	COL2A1	collagen, type II, alpha 1	2200	Hypochondrogenesis	Genatlas	93297	P02458	NP_001835.3:NP_149162.2
Core matrisome	Collagens	COL2A1	collagen, type II, alpha 1	2200	Hypochondrogenesis	HGNC	93297	P02458	NP_001835.3:NP_149162.2
Core matrisome	Collagens	COL2A1	collagen, type II, alpha 1	2200	Hypochondrogenesis	OMIM	93297	P02458	NP_001835.3:NP_149162.2
Core matrisome	Collagens	COL2A1	collagen, type II, alpha 1	2200	Hypochondrogenesis	Reactome	93297	P02458	NP_001835.3:NP_149162.2
Core matrisome	Collagens	COL2A1	collagen, type II, alpha 1	2200	Hypochondrogenesis	SwissProt	93297	P02458	NP_001835.3:NP_149162.2
Core matrisome	Collagens	COL2A1	collagen, type II, alpha 1	2200	Hypochondrogenesis	NA	93297	P02458	NP_001835.3:NP_149162.2
Core matrisome	Collagens	COL2A1	collagen, type II, alpha 1	2200	Kniest dysplasia	Ensembl	485	P02458	NP_001835.3:NP_149162.2
Core matrisome	Collagens	COL2A1	collagen, type II, alpha 1	2200	Kniest dysplasia	NA	485	P02458	NP_001835.3:NP_149162.2
Core matrisome	Collagens	COL2A1	collagen, type II, alpha 1	2200	Kniest dysplasia	Genatlas	485	P02458	NP_001835.3:NP_149162.2
Core matrisome	Collagens	COL2A1	collagen, type II, alpha 1	2200	Kniest dysplasia	HGNC	485	P02458	NP_001835.3:NP_149162.2
Core matrisome	Collagens	COL2A1	collagen, type II, alpha 1	2200	Kniest dysplasia	OMIM	485	P02458	NP_001835.3:NP_149162.2
Core matrisome	Collagens	COL2A1	collagen, type II, alpha 1	2200	Kniest dysplasia	Reactome	485	P02458	NP_001835.3:NP_149162.2
Core matrisome	Collagens	COL2A1	collagen, type II, alpha 1	2200	Kniest dysplasia	SwissProt	485	P02458	NP_001835.3:NP_149162.2
Core matrisome	Collagens	COL2A1	collagen, type II, alpha 1	2200	Kniest dysplasia	NA	485	P02458	NP_001835.3:NP_149162.2
Core matrisome	Collagens	COL2A1	collagen, type II, alpha 1	2200	Legg-Calvé-Perthes disease	Ensembl	2380	P02458	NP_001835.3:NP_149162.2
Core matrisome	Collagens	COL2A1	collagen, type II, alpha 1	2200	Legg-Calvé-Perthes disease	NA	2380	P02458	NP_001835.3:NP_149162.2
Core matrisome	Collagens	COL2A1	collagen, type II, alpha 1	2200	Legg-Calvé-Perthes disease	Genatlas	2380	P02458	NP_001835.3:NP_149162.2
Core matrisome	Collagens	COL2A1	collagen, type II, alpha 1	2200	Legg-Calvé-Perthes disease	HGNC	2380	P02458	NP_001835.3:NP_149162.2
Core matrisome	Collagens	COL2A1	collagen, type II, alpha 1	2200	Legg-Calvé-Perthes disease	OMIM	2380	P02458	NP_001835.3:NP_149162.2
Core matrisome	Collagens	COL2A1	collagen, type II, alpha 1	2200	Legg-Calvé-Perthes disease	Reactome	2380	P02458	NP_001835.3:NP_149162.2
Core matrisome	Collagens	COL2A1	collagen, type II, alpha 1	2200	Legg-Calvé-Perthes disease	SwissProt	2380	P02458	NP_001835.3:NP_149162.2
Core matrisome	Collagens	COL2A1	collagen, type II, alpha 1	2200	Legg-Calvé-Perthes disease	NA	2380	P02458	NP_001835.3:NP_149162.2
Core matrisome	Collagens	COL2A1	collagen, type II, alpha 1	2200	Mild spondyloepiphyseal dysplasia due to COL2A1 mutation with early-onset osteoarthritis	Ensembl	93279	P02458	NP_001835.3:NP_149162.2
Core matrisome	Collagens	COL2A1	collagen, type II, alpha 1	2200	Mild spondyloepiphyseal dysplasia due to COL2A1 mutation with early-onset osteoarthritis	NA	93279	P02458	NP_001835.3:NP_149162.2
Core matrisome	Collagens	COL2A1	collagen, type II, alpha 1	2200	Mild spondyloepiphyseal dysplasia due to COL2A1 mutation with early-onset osteoarthritis	Genatlas	93279	P02458	NP_001835.3:NP_149162.2
Core matrisome	Collagens	COL2A1	collagen, type II, alpha 1	2200	Mild spondyloepiphyseal dysplasia due to COL2A1 mutation with early-onset osteoarthritis	HGNC	93279	P02458	NP_001835.3:NP_149162.2
Core matrisome	Collagens	COL2A1	collagen, type II, alpha 1	2200	Mild spondyloepiphyseal dysplasia due to COL2A1 mutation with early-onset osteoarthritis	OMIM	93279	P02458	NP_001835.3:NP_149162.2
Core matrisome	Collagens	COL2A1	collagen, type II, alpha 1	2200	Mild spondyloepiphyseal dysplasia due to COL2A1 mutation with early-onset osteoarthritis	Reactome	93279	P02458	NP_001835.3:NP_149162.2
Core matrisome	Collagens	COL2A1	collagen, type II, alpha 1	2200	Mild spondyloepiphyseal dysplasia due to COL2A1 mutation with early-onset osteoarthritis	SwissProt	93279	P02458	NP_001835.3:NP_149162.2
Core matrisome	Collagens	COL2A1	collagen, type II, alpha 1	2200	Mild spondyloepiphyseal dysplasia due to COL2A1 mutation with early-onset osteoarthritis	NA	93279	P02458	NP_001835.3:NP_149162.2
Core matrisome	Collagens	COL2A1	collagen, type II, alpha 1	2200	Multiple epiphyseal dysplasia, Beighton type	Ensembl	166011	P02458	NP_001835.3:NP_149162.2
Core matrisome	Collagens	COL2A1	collagen, type II, alpha 1	2200	Multiple epiphyseal dysplasia, Beighton type	NA	166011	P02458	NP_001835.3:NP_149162.2
Core matrisome	Collagens	COL2A1	collagen, type II, alpha 1	2200	Multiple epiphyseal dysplasia, Beighton type	Genatlas	166011	P02458	NP_001835.3:NP_149162.2
Core matrisome	Collagens	COL2A1	collagen, type II, alpha 1	2200	Multiple epiphyseal dysplasia, Beighton type	HGNC	166011	P02458	NP_001835.3:NP_149162.2
Core matrisome	Collagens	COL2A1	collagen, type II, alpha 1	2200	Multiple epiphyseal dysplasia, Beighton type	OMIM	166011	P02458	NP_001835.3:NP_149162.2
Core matrisome	Collagens	COL2A1	collagen, type II, alpha 1	2200	Multiple epiphyseal dysplasia, Beighton type	Reactome	166011	P02458	NP_001835.3:NP_149162.2
Core matrisome	Collagens	COL2A1	collagen, type II, alpha 1	2200	Multiple epiphyseal dysplasia, Beighton type	SwissProt	166011	P02458	NP_001835.3:NP_149162.2
Core matrisome	Collagens	COL2A1	collagen, type II, alpha 1	2200	Multiple epiphyseal dysplasia, Beighton type	NA	166011	P02458	NP_001835.3:NP_149162.2
Core matrisome	Collagens	COL2A1	collagen, type II, alpha 1	2200	Platyspondylic dysplasia, Torrance type	Ensembl	85166	P02458	NP_001835.3:NP_149162.2
Core matrisome	Collagens	COL2A1	collagen, type II, alpha 1	2200	Platyspondylic dysplasia, Torrance type	NA	85166	P02458	NP_001835.3:NP_149162.2
Core matrisome	Collagens	COL2A1	collagen, type II, alpha 1	2200	Platyspondylic dysplasia, Torrance type	Genatlas	85166	P02458	NP_001835.3:NP_149162.2
Core matrisome	Collagens	COL2A1	collagen, type II, alpha 1	2200	Platyspondylic dysplasia, Torrance type	HGNC	85166	P02458	NP_001835.3:NP_149162.2
Core matrisome	Collagens	COL2A1	collagen, type II, alpha 1	2200	Platyspondylic dysplasia, Torrance type	OMIM	85166	P02458	NP_001835.3:NP_149162.2
Core matrisome	Collagens	COL2A1	collagen, type II, alpha 1	2200	Platyspondylic dysplasia, Torrance type	Reactome	85166	P02458	NP_001835.3:NP_149162.2
Core matrisome	Collagens	COL2A1	collagen, type II, alpha 1	2200	Platyspondylic dysplasia, Torrance type	SwissProt	85166	P02458	NP_001835.3:NP_149162.2
Core matrisome	Collagens	COL2A1	collagen, type II, alpha 1	2200	Platyspondylic dysplasia, Torrance type	NA	85166	P02458	NP_001835.3:NP_149162.2
Core matrisome	Collagens	COL2A1	collagen, type II, alpha 1	2200	Spondyloepimetaphyseal dysplasia congenita, Strudwick type	Ensembl	93346	P02458	NP_001835.3:NP_149162.2
Core matrisome	Collagens	COL2A1	collagen, type II, alpha 1	2200	Spondyloepimetaphyseal dysplasia congenita, Strudwick type	NA	93346	P02458	NP_001835.3:NP_149162.2
Core matrisome	Collagens	COL2A1	collagen, type II, alpha 1	2200	Spondyloepimetaphyseal dysplasia congenita, Strudwick type	Genatlas	93346	P02458	NP_001835.3:NP_149162.2
Core matrisome	Collagens	COL2A1	collagen, type II, alpha 1	2200	Spondyloepimetaphyseal dysplasia congenita, Strudwick type	HGNC	93346	P02458	NP_001835.3:NP_149162.2
Core matrisome	Collagens	COL2A1	collagen, type II, alpha 1	2200	Spondyloepimetaphyseal dysplasia congenita, Strudwick type	OMIM	93346	P02458	NP_001835.3:NP_149162.2
Core matrisome	Collagens	COL2A1	collagen, type II, alpha 1	2200	Spondyloepimetaphyseal dysplasia congenita, Strudwick type	Reactome	93346	P02458	NP_001835.3:NP_149162.2
Core matrisome	Collagens	COL2A1	collagen, type II, alpha 1	2200	Spondyloepimetaphyseal dysplasia congenita, Strudwick type	SwissProt	93346	P02458	NP_001835.3:NP_149162.2
Core matrisome	Collagens	COL2A1	collagen, type II, alpha 1	2200	Spondyloepimetaphyseal dysplasia congenita, Strudwick type	NA	93346	P02458	NP_001835.3:NP_149162.2
Core matrisome	Collagens	COL2A1	collagen, type II, alpha 1	2200	Spondyloepiphyseal dysplasia congenita	Ensembl	94068	P02458	NP_001835.3:NP_149162.2
Core matrisome	Collagens	COL2A1	collagen, type II, alpha 1	2200	Spondyloepiphyseal dysplasia congenita	NA	94068	P02458	NP_001835.3:NP_149162.2
Core matrisome	Collagens	COL2A1	collagen, type II, alpha 1	2200	Spondyloepiphyseal dysplasia congenita	Genatlas	94068	P02458	NP_001835.3:NP_149162.2
Core matrisome	Collagens	COL2A1	collagen, type II, alpha 1	2200	Spondyloepiphyseal dysplasia congenita	HGNC	94068	P02458	NP_001835.3:NP_149162.2
Core matrisome	Collagens	COL2A1	collagen, type II, alpha 1	2200	Spondyloepiphyseal dysplasia congenita	OMIM	94068	P02458	NP_001835.3:NP_149162.2
Core matrisome	Collagens	COL2A1	collagen, type II, alpha 1	2200	Spondyloepiphyseal dysplasia congenita	Reactome	94068	P02458	NP_001835.3:NP_149162.2
Core matrisome	Collagens	COL2A1	collagen, type II, alpha 1	2200	Spondyloepiphyseal dysplasia congenita	SwissProt	94068	P02458	NP_001835.3:NP_149162.2
Core matrisome	Collagens	COL2A1	collagen, type II, alpha 1	2200	Spondyloepiphyseal dysplasia congenita	NA	94068	P02458	NP_001835.3:NP_149162.2
Core matrisome	Collagens	COL2A1	collagen, type II, alpha 1	2200	Spondyloepiphyseal dysplasia, Stanescu type	Ensembl	459051	P02458	NP_001835.3:NP_149162.2
Core matrisome	Collagens	COL2A1	collagen, type II, alpha 1	2200	Spondyloepiphyseal dysplasia, Stanescu type	NA	459051	P02458	NP_001835.3:NP_149162.2
Core matrisome	Collagens	COL2A1	collagen, type II, alpha 1	2200	Spondyloepiphyseal dysplasia, Stanescu type	Genatlas	459051	P02458	NP_001835.3:NP_149162.2
Core matrisome	Collagens	COL2A1	collagen, type II, alpha 1	2200	Spondyloepiphyseal dysplasia, Stanescu type	HGNC	459051	P02458	NP_001835.3:NP_149162.2
Core matrisome	Collagens	COL2A1	collagen, type II, alpha 1	2200	Spondyloepiphyseal dysplasia, Stanescu type	OMIM	459051	P02458	NP_001835.3:NP_149162.2
Core matrisome	Collagens	COL2A1	collagen, type II, alpha 1	2200	Spondyloepiphyseal dysplasia, Stanescu type	Reactome	459051	P02458	NP_001835.3:NP_149162.2
Core matrisome	Collagens	COL2A1	collagen, type II, alpha 1	2200	Spondyloepiphyseal dysplasia, Stanescu type	SwissProt	459051	P02458	NP_001835.3:NP_149162.2
Core matrisome	Collagens	COL2A1	collagen, type II, alpha 1	2200	Spondyloepiphyseal dysplasia, Stanescu type	NA	459051	P02458	NP_001835.3:NP_149162.2
Core matrisome	Collagens	COL2A1	collagen, type II, alpha 1	2200	Spondylometaphyseal dysplasia, 'corner fracture' type	Ensembl	93315	P02458	NP_001835.3:NP_149162.2
Core matrisome	Collagens	COL2A1	collagen, type II, alpha 1	2200	Spondylometaphyseal dysplasia, 'corner fracture' type	NA	93315	P02458	NP_001835.3:NP_149162.2
Core matrisome	Collagens	COL2A1	collagen, type II, alpha 1	2200	Spondylometaphyseal dysplasia, 'corner fracture' type	Genatlas	93315	P02458	NP_001835.3:NP_149162.2
Core matrisome	Collagens	COL2A1	collagen, type II, alpha 1	2200	Spondylometaphyseal dysplasia, 'corner fracture' type	HGNC	93315	P02458	NP_001835.3:NP_149162.2
Core matrisome	Collagens	COL2A1	collagen, type II, alpha 1	2200	Spondylometaphyseal dysplasia, 'corner fracture' type	OMIM	93315	P02458	NP_001835.3:NP_149162.2
Core matrisome	Collagens	COL2A1	collagen, type II, alpha 1	2200	Spondylometaphyseal dysplasia, 'corner fracture' type	Reactome	93315	P02458	NP_001835.3:NP_149162.2
Core matrisome	Collagens	COL2A1	collagen, type II, alpha 1	2200	Spondylometaphyseal dysplasia, 'corner fracture' type	SwissProt	93315	P02458	NP_001835.3:NP_149162.2
Core matrisome	Collagens	COL2A1	collagen, type II, alpha 1	2200	Spondylometaphyseal dysplasia, 'corner fracture' type	NA	93315	P02458	NP_001835.3:NP_149162.2
Core matrisome	Collagens	COL2A1	collagen, type II, alpha 1	2200	Spondylometaphyseal dysplasia, Schmidt type	Ensembl	93316	P02458	NP_001835.3:NP_149162.2
Core matrisome	Collagens	COL2A1	collagen, type II, alpha 1	2200	Spondylometaphyseal dysplasia, Schmidt type	NA	93316	P02458	NP_001835.3:NP_149162.2
Core matrisome	Collagens	COL2A1	collagen, type II, alpha 1	2200	Spondylometaphyseal dysplasia, Schmidt type	Genatlas	93316	P02458	NP_001835.3:NP_149162.2
Core matrisome	Collagens	COL2A1	collagen, type II, alpha 1	2200	Spondylometaphyseal dysplasia, Schmidt type	HGNC	93316	P02458	NP_001835.3:NP_149162.2
Core matrisome	Collagens	COL2A1	collagen, type II, alpha 1	2200	Spondylometaphyseal dysplasia, Schmidt type	OMIM	93316	P02458	NP_001835.3:NP_149162.2
Core matrisome	Collagens	COL2A1	collagen, type II, alpha 1	2200	Spondylometaphyseal dysplasia, Schmidt type	Reactome	93316	P02458	NP_001835.3:NP_149162.2
Core matrisome	Collagens	COL2A1	collagen, type II, alpha 1	2200	Spondylometaphyseal dysplasia, Schmidt type	SwissProt	93316	P02458	NP_001835.3:NP_149162.2
Core matrisome	Collagens	COL2A1	collagen, type II, alpha 1	2200	Spondylometaphyseal dysplasia, Schmidt type	NA	93316	P02458	NP_001835.3:NP_149162.2
Core matrisome	Collagens	COL2A1	collagen, type II, alpha 1	2200	Spondyloperipheral dysplasia-short ulna syndrome	Ensembl	1856	P02458	NP_001835.3:NP_149162.2
Core matrisome	Collagens	COL2A1	collagen, type II, alpha 1	2200	Spondyloperipheral dysplasia-short ulna syndrome	NA	1856	P02458	NP_001835.3:NP_149162.2
Core matrisome	Collagens	COL2A1	collagen, type II, alpha 1	2200	Spondyloperipheral dysplasia-short ulna syndrome	Genatlas	1856	P02458	NP_001835.3:NP_149162.2
Core matrisome	Collagens	COL2A1	collagen, type II, alpha 1	2200	Spondyloperipheral dysplasia-short ulna syndrome	HGNC	1856	P02458	NP_001835.3:NP_149162.2
Core matrisome	Collagens	COL2A1	collagen, type II, alpha 1	2200	Spondyloperipheral dysplasia-short ulna syndrome	OMIM	1856	P02458	NP_001835.3:NP_149162.2
Core matrisome	Collagens	COL2A1	collagen, type II, alpha 1	2200	Spondyloperipheral dysplasia-short ulna syndrome	Reactome	1856	P02458	NP_001835.3:NP_149162.2
Core matrisome	Collagens	COL2A1	collagen, type II, alpha 1	2200	Spondyloperipheral dysplasia-short ulna syndrome	SwissProt	1856	P02458	NP_001835.3:NP_149162.2
Core matrisome	Collagens	COL2A1	collagen, type II, alpha 1	2200	Spondyloperipheral dysplasia-short ulna syndrome	NA	1856	P02458	NP_001835.3:NP_149162.2
Core matrisome	Collagens	COL2A1	collagen, type II, alpha 1	2200	Stickler syndrome type 1	Ensembl	90653	P02458	NP_001835.3:NP_149162.2
Core matrisome	Collagens	COL2A1	collagen, type II, alpha 1	2200	Stickler syndrome type 1	NA	90653	P02458	NP_001835.3:NP_149162.2
Core matrisome	Collagens	COL2A1	collagen, type II, alpha 1	2200	Stickler syndrome type 1	Genatlas	90653	P02458	NP_001835.3:NP_149162.2
Core matrisome	Collagens	COL2A1	collagen, type II, alpha 1	2200	Stickler syndrome type 1	HGNC	90653	P02458	NP_001835.3:NP_149162.2
Core matrisome	Collagens	COL2A1	collagen, type II, alpha 1	2200	Stickler syndrome type 1	OMIM	90653	P02458	NP_001835.3:NP_149162.2
Core matrisome	Collagens	COL2A1	collagen, type II, alpha 1	2200	Stickler syndrome type 1	Reactome	90653	P02458	NP_001835.3:NP_149162.2
Core matrisome	Collagens	COL2A1	collagen, type II, alpha 1	2200	Stickler syndrome type 1	SwissProt	90653	P02458	NP_001835.3:NP_149162.2
Core matrisome	Collagens	COL2A1	collagen, type II, alpha 1	2200	Stickler syndrome type 1	NA	90653	P02458	NP_001835.3:NP_149162.2
Core matrisome	Collagens	COL2A1	collagen, type II, alpha 1	2200	Weissenbacher- Zweymuller syndrome	Ensembl	3450	P02458	NP_001835.3:NP_149162.2
Core matrisome	Collagens	COL2A1	collagen, type II, alpha 1	2200	Weissenbacher- Zweymuller syndrome	NA	3450	P02458	NP_001835.3:NP_149162.2
Core matrisome	Collagens	COL2A1	collagen, type II, alpha 1	2200	Weissenbacher- Zweymuller syndrome	Genatlas	3450	P02458	NP_001835.3:NP_149162.2
Core matrisome	Collagens	COL2A1	collagen, type II, alpha 1	2200	Weissenbacher- Zweymuller syndrome	HGNC	3450	P02458	NP_001835.3:NP_149162.2
Core matrisome	Collagens	COL2A1	collagen, type II, alpha 1	2200	Weissenbacher- Zweymuller syndrome	OMIM	3450	P02458	NP_001835.3:NP_149162.2
Core matrisome	Collagens	COL2A1	collagen, type II, alpha 1	2200	Weissenbacher- Zweymuller syndrome	Reactome	3450	P02458	NP_001835.3:NP_149162.2
Core matrisome	Collagens	COL2A1	collagen, type II, alpha 1	2200	Weissenbacher- Zweymuller syndrome	SwissProt	3450	P02458	NP_001835.3:NP_149162.2
Core matrisome	Collagens	COL2A1	collagen, type II, alpha 1	2200	Weissenbacher- Zweymuller syndrome	NA	3450	P02458	NP_001835.3:NP_149162.2
Core matrisome	Collagens	COL3A1	collagen, type III, alpha 1	2201	Acrogeria	NA	2500	E7ENY8:H7C435:P02461	NP_000081.1
Core matrisome	Collagens	COL3A1	collagen, type III, alpha 1	2201	Acrogeria	Genatlas	2500	E7ENY8:H7C435:P02461	NP_000081.1
Core matrisome	Collagens	COL3A1	collagen, type III, alpha 1	2201	Acrogeria	HGNC	2500	E7ENY8:H7C435:P02461	NP_000081.1
Core matrisome	Collagens	COL3A1	collagen, type III, alpha 1	2201	Acrogeria	OMIM	2500	E7ENY8:H7C435:P02461	NP_000081.1
Core matrisome	Collagens	COL3A1	collagen, type III, alpha 1	2201	Acrogeria	Reactome	2500	E7ENY8:H7C435:P02461	NP_000081.1
Core matrisome	Collagens	COL3A1	collagen, type III, alpha 1	2201	Acrogeria	SwissProt	2500	E7ENY8:H7C435:P02461	NP_000081.1
Core matrisome	Collagens	COL3A1	collagen, type III, alpha 1	2201	Acrogeria	NA	2500	E7ENY8:H7C435:P02461	NP_000081.1
Core matrisome	Collagens	COL3A1	collagen, type III, alpha 1	2201	Acrogeria	Ensembl	2500	E7ENY8:H7C435:P02461	NP_000081.1
Core matrisome	Collagens	COL3A1	collagen, type III, alpha 1	2201	Ehlers-Danlos syndrome, vascular type	Ensembl	286	E7ENY8:H7C435:P02461	NP_000081.1
Core matrisome	Collagens	COL3A1	collagen, type III, alpha 1	2201	Ehlers-Danlos syndrome, vascular type	NA	286	E7ENY8:H7C435:P02461	NP_000081.1
Core matrisome	Collagens	COL3A1	collagen, type III, alpha 1	2201	Ehlers-Danlos syndrome, vascular type	Genatlas	286	E7ENY8:H7C435:P02461	NP_000081.1
Core matrisome	Collagens	COL3A1	collagen, type III, alpha 1	2201	Ehlers-Danlos syndrome, vascular type	HGNC	286	E7ENY8:H7C435:P02461	NP_000081.1
Core matrisome	Collagens	COL3A1	collagen, type III, alpha 1	2201	Ehlers-Danlos syndrome, vascular type	OMIM	286	E7ENY8:H7C435:P02461	NP_000081.1
Core matrisome	Collagens	COL3A1	collagen, type III, alpha 1	2201	Ehlers-Danlos syndrome, vascular type	Reactome	286	E7ENY8:H7C435:P02461	NP_000081.1
Core matrisome	Collagens	COL3A1	collagen, type III, alpha 1	2201	Ehlers-Danlos syndrome, vascular type	SwissProt	286	E7ENY8:H7C435:P02461	NP_000081.1
Core matrisome	Collagens	COL3A1	collagen, type III, alpha 1	2201	Ehlers-Danlos syndrome, vascular type	NA	286	E7ENY8:H7C435:P02461	NP_000081.1
Core matrisome	Collagens	COL3A1	collagen, type III, alpha 1	2201	Familial abdominal aortic aneurysm	Ensembl	86	E7ENY8:H7C435:P02461	NP_000081.1
Core matrisome	Collagens	COL3A1	collagen, type III, alpha 1	2201	Familial abdominal aortic aneurysm	NA	86	E7ENY8:H7C435:P02461	NP_000081.1
Core matrisome	Collagens	COL3A1	collagen, type III, alpha 1	2201	Familial abdominal aortic aneurysm	Genatlas	86	E7ENY8:H7C435:P02461	NP_000081.1
Core matrisome	Collagens	COL3A1	collagen, type III, alpha 1	2201	Familial abdominal aortic aneurysm	HGNC	86	E7ENY8:H7C435:P02461	NP_000081.1
Core matrisome	Collagens	COL3A1	collagen, type III, alpha 1	2201	Familial abdominal aortic aneurysm	OMIM	86	E7ENY8:H7C435:P02461	NP_000081.1
Core matrisome	Collagens	COL3A1	collagen, type III, alpha 1	2201	Familial abdominal aortic aneurysm	Reactome	86	E7ENY8:H7C435:P02461	NP_000081.1
Core matrisome	Collagens	COL3A1	collagen, type III, alpha 1	2201	Familial abdominal aortic aneurysm	SwissProt	86	E7ENY8:H7C435:P02461	NP_000081.1
Core matrisome	Collagens	COL3A1	collagen, type III, alpha 1	2201	Familial abdominal aortic aneurysm	NA	86	E7ENY8:H7C435:P02461	NP_000081.1
Core matrisome	Collagens	COL3A1	collagen, type III, alpha 1	2201	Familial cerebral saccular aneurysm	Ensembl	231160	E7ENY8:H7C435:P02461	NP_000081.1
Core matrisome	Collagens	COL3A1	collagen, type III, alpha 1	2201	Familial cerebral saccular aneurysm	NA	231160	E7ENY8:H7C435:P02461	NP_000081.1
Core matrisome	Collagens	COL3A1	collagen, type III, alpha 1	2201	Familial cerebral saccular aneurysm	Genatlas	231160	E7ENY8:H7C435:P02461	NP_000081.1
Core matrisome	Collagens	COL3A1	collagen, type III, alpha 1	2201	Familial cerebral saccular aneurysm	HGNC	231160	E7ENY8:H7C435:P02461	NP_000081.1
Core matrisome	Collagens	COL3A1	collagen, type III, alpha 1	2201	Familial cerebral saccular aneurysm	OMIM	231160	E7ENY8:H7C435:P02461	NP_000081.1
Core matrisome	Collagens	COL3A1	collagen, type III, alpha 1	2201	Familial cerebral saccular aneurysm	Reactome	231160	E7ENY8:H7C435:P02461	NP_000081.1
Core matrisome	Collagens	COL3A1	collagen, type III, alpha 1	2201	Familial cerebral saccular aneurysm	SwissProt	231160	E7ENY8:H7C435:P02461	NP_000081.1
Core matrisome	Collagens	COL3A1	collagen, type III, alpha 1	2201	Familial cerebral saccular aneurysm	NA	231160	E7ENY8:H7C435:P02461	NP_000081.1
Core matrisome	Collagens	COL4A1	collagen, type IV, alpha 1	2202	COL4A1-related familial vascular leukoencephalopathy	Ensembl	36383	F5H5K0:P02462	NP_001836.2
Core matrisome	Collagens	COL4A1	collagen, type IV, alpha 1	2202	COL4A1-related familial vascular leukoencephalopathy	NA	36383	F5H5K0:P02462	NP_001836.2
Core matrisome	Collagens	COL4A1	collagen, type IV, alpha 1	2202	COL4A1-related familial vascular leukoencephalopathy	Genatlas	36383	F5H5K0:P02462	NP_001836.2
Core matrisome	Collagens	COL4A1	collagen, type IV, alpha 1	2202	COL4A1-related familial vascular leukoencephalopathy	HGNC	36383	F5H5K0:P02462	NP_001836.2
Core matrisome	Collagens	COL4A1	collagen, type IV, alpha 1	2202	COL4A1-related familial vascular leukoencephalopathy	OMIM	36383	F5H5K0:P02462	NP_001836.2
Core matrisome	Collagens	COL4A1	collagen, type IV, alpha 1	2202	COL4A1-related familial vascular leukoencephalopathy	Reactome	36383	F5H5K0:P02462	NP_001836.2
Core matrisome	Collagens	COL4A1	collagen, type IV, alpha 1	2202	COL4A1-related familial vascular leukoencephalopathy	SwissProt	36383	F5H5K0:P02462	NP_001836.2
Core matrisome	Collagens	COL4A1	collagen, type IV, alpha 1	2202	COL4A1-related familial vascular leukoencephalopathy	NA	36383	F5H5K0:P02462	NP_001836.2
Core matrisome	Collagens	COL4A1	collagen, type IV, alpha 1	2202	Familial porencephaly	Ensembl	99810	F5H5K0:P02462	NP_001836.2
Core matrisome	Collagens	COL4A1	collagen, type IV, alpha 1	2202	Familial porencephaly	NA	99810	F5H5K0:P02462	NP_001836.2
Core matrisome	Collagens	COL4A1	collagen, type IV, alpha 1	2202	Familial porencephaly	Genatlas	99810	F5H5K0:P02462	NP_001836.2
Core matrisome	Collagens	COL4A1	collagen, type IV, alpha 1	2202	Familial porencephaly	HGNC	99810	F5H5K0:P02462	NP_001836.2
Core matrisome	Collagens	COL4A1	collagen, type IV, alpha 1	2202	Familial porencephaly	OMIM	99810	F5H5K0:P02462	NP_001836.2
Core matrisome	Collagens	COL4A1	collagen, type IV, alpha 1	2202	Familial porencephaly	Reactome	99810	F5H5K0:P02462	NP_001836.2
Core matrisome	Collagens	COL4A1	collagen, type IV, alpha 1	2202	Familial porencephaly	SwissProt	99810	F5H5K0:P02462	NP_001836.2
Core matrisome	Collagens	COL4A1	collagen, type IV, alpha 1	2202	Familial porencephaly	NA	99810	F5H5K0:P02462	NP_001836.2
Core matrisome	Collagens	COL4A1	collagen, type IV, alpha 1	2202	Familial schizencephaly	Ensembl	481986	F5H5K0:P02462	NP_001836.2
Core matrisome	Collagens	COL4A1	collagen, type IV, alpha 1	2202	Familial schizencephaly	NA	481986	F5H5K0:P02462	NP_001836.2
Core matrisome	Collagens	COL4A1	collagen, type IV, alpha 1	2202	Familial schizencephaly	Genatlas	481986	F5H5K0:P02462	NP_001836.2
Core matrisome	Collagens	COL4A1	collagen, type IV, alpha 1	2202	Familial schizencephaly	HGNC	481986	F5H5K0:P02462	NP_001836.2
Core matrisome	Collagens	COL4A1	collagen, type IV, alpha 1	2202	Familial schizencephaly	OMIM	481986	F5H5K0:P02462	NP_001836.2
Core matrisome	Collagens	COL4A1	collagen, type IV, alpha 1	2202	Familial schizencephaly	Reactome	481986	F5H5K0:P02462	NP_001836.2
Core matrisome	Collagens	COL4A1	collagen, type IV, alpha 1	2202	Familial schizencephaly	SwissProt	481986	F5H5K0:P02462	NP_001836.2
Core matrisome	Collagens	COL4A1	collagen, type IV, alpha 1	2202	Familial schizencephaly	NA	481986	F5H5K0:P02462	NP_001836.2
Core matrisome	Collagens	COL4A1	collagen, type IV, alpha 1	2202	HANAC syndrome	Ensembl	73229	F5H5K0:P02462	NP_001836.2
Core matrisome	Collagens	COL4A1	collagen, type IV, alpha 1	2202	HANAC syndrome	NA	73229	F5H5K0:P02462	NP_001836.2
Core matrisome	Collagens	COL4A1	collagen, type IV, alpha 1	2202	HANAC syndrome	Genatlas	73229	F5H5K0:P02462	NP_001836.2
Core matrisome	Collagens	COL4A1	collagen, type IV, alpha 1	2202	HANAC syndrome	HGNC	73229	F5H5K0:P02462	NP_001836.2
Core matrisome	Collagens	COL4A1	collagen, type IV, alpha 1	2202	HANAC syndrome	OMIM	73229	F5H5K0:P02462	NP_001836.2
Core matrisome	Collagens	COL4A1	collagen, type IV, alpha 1	2202	HANAC syndrome	Reactome	73229	F5H5K0:P02462	NP_001836.2
Core matrisome	Collagens	COL4A1	collagen, type IV, alpha 1	2202	HANAC syndrome	SwissProt	73229	F5H5K0:P02462	NP_001836.2
Core matrisome	Collagens	COL4A1	collagen, type IV, alpha 1	2202	HANAC syndrome	NA	73229	F5H5K0:P02462	NP_001836.2
Core matrisome	Collagens	COL4A1	collagen, type IV, alpha 1	2202	Pontine autosomal dominant microangiopathy with leukoencephalopathy	Ensembl	477749	F5H5K0:P02462	NP_001836.2
Core matrisome	Collagens	COL4A1	collagen, type IV, alpha 1	2202	Pontine autosomal dominant microangiopathy with leukoencephalopathy	NA	477749	F5H5K0:P02462	NP_001836.2
Core matrisome	Collagens	COL4A1	collagen, type IV, alpha 1	2202	Pontine autosomal dominant microangiopathy with leukoencephalopathy	Genatlas	477749	F5H5K0:P02462	NP_001836.2
Core matrisome	Collagens	COL4A1	collagen, type IV, alpha 1	2202	Pontine autosomal dominant microangiopathy with leukoencephalopathy	HGNC	477749	F5H5K0:P02462	NP_001836.2
Core matrisome	Collagens	COL4A1	collagen, type IV, alpha 1	2202	Pontine autosomal dominant microangiopathy with leukoencephalopathy	OMIM	477749	F5H5K0:P02462	NP_001836.2
Core matrisome	Collagens	COL4A1	collagen, type IV, alpha 1	2202	Pontine autosomal dominant microangiopathy with leukoencephalopathy	Reactome	477749	F5H5K0:P02462	NP_001836.2
Core matrisome	Collagens	COL4A1	collagen, type IV, alpha 1	2202	Pontine autosomal dominant microangiopathy with leukoencephalopathy	SwissProt	477749	F5H5K0:P02462	NP_001836.2
Core matrisome	Collagens	COL4A1	collagen, type IV, alpha 1	2202	Pontine autosomal dominant microangiopathy with leukoencephalopathy	NA	477749	F5H5K0:P02462	NP_001836.2
Core matrisome	Collagens	COL4A1	collagen, type IV, alpha 1	2202	Retinal arterial tortuosity	Ensembl	75326	F5H5K0:P02462	NP_001836.2
Core matrisome	Collagens	COL4A1	collagen, type IV, alpha 1	2202	Retinal arterial tortuosity	NA	75326	F5H5K0:P02462	NP_001836.2
Core matrisome	Collagens	COL4A1	collagen, type IV, alpha 1	2202	Retinal arterial tortuosity	Genatlas	75326	F5H5K0:P02462	NP_001836.2
Core matrisome	Collagens	COL4A1	collagen, type IV, alpha 1	2202	Retinal arterial tortuosity	HGNC	75326	F5H5K0:P02462	NP_001836.2
Core matrisome	Collagens	COL4A1	collagen, type IV, alpha 1	2202	Retinal arterial tortuosity	OMIM	75326	F5H5K0:P02462	NP_001836.2
Core matrisome	Collagens	COL4A1	collagen, type IV, alpha 1	2202	Retinal arterial tortuosity	Reactome	75326	F5H5K0:P02462	NP_001836.2
Core matrisome	Collagens	COL4A1	collagen, type IV, alpha 1	2202	Retinal arterial tortuosity	SwissProt	75326	F5H5K0:P02462	NP_001836.2
Core matrisome	Collagens	COL4A1	collagen, type IV, alpha 1	2202	Retinal arterial tortuosity	NA	75326	F5H5K0:P02462	NP_001836.2
Core matrisome	Collagens	COL4A1	collagen, type IV, alpha 1	2202	Walker-Warburg syndrome	Ensembl	899	F5H5K0:P02462	NP_001836.2
Core matrisome	Collagens	COL4A1	collagen, type IV, alpha 1	2202	Walker-Warburg syndrome	NA	899	F5H5K0:P02462	NP_001836.2
Core matrisome	Collagens	COL4A1	collagen, type IV, alpha 1	2202	Walker-Warburg syndrome	Genatlas	899	F5H5K0:P02462	NP_001836.2
Core matrisome	Collagens	COL4A1	collagen, type IV, alpha 1	2202	Walker-Warburg syndrome	HGNC	899	F5H5K0:P02462	NP_001836.2
Core matrisome	Collagens	COL4A1	collagen, type IV, alpha 1	2202	Walker-Warburg syndrome	OMIM	899	F5H5K0:P02462	NP_001836.2
Core matrisome	Collagens	COL4A1	collagen, type IV, alpha 1	2202	Walker-Warburg syndrome	Reactome	899	F5H5K0:P02462	NP_001836.2
Core matrisome	Collagens	COL4A1	collagen, type IV, alpha 1	2202	Walker-Warburg syndrome	SwissProt	899	F5H5K0:P02462	NP_001836.2
Core matrisome	Collagens	COL4A1	collagen, type IV, alpha 1	2202	Walker-Warburg syndrome	NA	899	F5H5K0:P02462	NP_001836.2
Core matrisome	Collagens	COL4A2	collagen, type IV, alpha 2	2203	Familial porencephaly	NA	99810	A2A352:P08572	NP_001837.2
Core matrisome	Collagens	COL4A2	collagen, type IV, alpha 2	2203	Familial porencephaly	NA	99810	A2A352:P08572	NP_001837.2
Core matrisome	Collagens	COL4A2	collagen, type IV, alpha 2	2203	Familial porencephaly	NA	99810	A2A352:P08572	NP_001837.2
Core matrisome	Collagens	COL4A2	collagen, type IV, alpha 2	2203	Familial porencephaly	NA	99810	A2A352:P08572	NP_001837.2
Core matrisome	Collagens	COL4A2	collagen, type IV, alpha 2	2203	Familial porencephaly	Genatlas	99810	A2A352:P08572	NP_001837.2
Core matrisome	Collagens	COL4A2	collagen, type IV, alpha 2	2203	Familial porencephaly	HGNC	99810	A2A352:P08572	NP_001837.2
Core matrisome	Collagens	COL4A2	collagen, type IV, alpha 2	2203	Familial porencephaly	OMIM	99810	A2A352:P08572	NP_001837.2
Core matrisome	Collagens	COL4A2	collagen, type IV, alpha 2	2203	Familial porencephaly	Reactome	99810	A2A352:P08572	NP_001837.2
Core matrisome	Collagens	COL4A2	collagen, type IV, alpha 2	2203	Familial porencephaly	SwissProt	99810	A2A352:P08572	NP_001837.2
Core matrisome	Collagens	COL4A2	collagen, type IV, alpha 2	2203	Familial porencephaly	NA	99810	A2A352:P08572	NP_001837.2
Core matrisome	Collagens	COL4A2	collagen, type IV, alpha 2	2203	Familial porencephaly	Ensembl	99810	A2A352:P08572	NP_001837.2
Core matrisome	Collagens	COL4A3	collagen, type IV, alpha 3 (Goodpasture antigen)	2204	Autosomal dominant Alport syndrome	NA	88918	H7BXM4:Q01955	NP_000082.2
Core matrisome	Collagens	COL4A3	collagen, type IV, alpha 3 (Goodpasture antigen)	2204	Autosomal dominant Alport syndrome	Genatlas	88918	H7BXM4:Q01955	NP_000082.2
Core matrisome	Collagens	COL4A3	collagen, type IV, alpha 3 (Goodpasture antigen)	2204	Autosomal dominant Alport syndrome	HGNC	88918	H7BXM4:Q01955	NP_000082.2
Core matrisome	Collagens	COL4A3	collagen, type IV, alpha 3 (Goodpasture antigen)	2204	Autosomal dominant Alport syndrome	OMIM	88918	H7BXM4:Q01955	NP_000082.2
Core matrisome	Collagens	COL4A3	collagen, type IV, alpha 3 (Goodpasture antigen)	2204	Autosomal dominant Alport syndrome	Reactome	88918	H7BXM4:Q01955	NP_000082.2
Core matrisome	Collagens	COL4A3	collagen, type IV, alpha 3 (Goodpasture antigen)	2204	Autosomal dominant Alport syndrome	SwissProt	88918	H7BXM4:Q01955	NP_000082.2
Core matrisome	Collagens	COL4A3	collagen, type IV, alpha 3 (Goodpasture antigen)	2204	Autosomal dominant Alport syndrome	NA	88918	H7BXM4:Q01955	NP_000082.2
Core matrisome	Collagens	COL4A3	collagen, type IV, alpha 3 (Goodpasture antigen)	2204	Autosomal dominant Alport syndrome	Ensembl	88918	H7BXM4:Q01955	NP_000082.2
Core matrisome	Collagens	COL4A3	collagen, type IV, alpha 3 (Goodpasture antigen)	2204	Autosomal recessive Alport syndrome	NA	88919	H7BXM4:Q01955	NP_000082.2
Core matrisome	Collagens	COL4A3	collagen, type IV, alpha 3 (Goodpasture antigen)	2204	Autosomal recessive Alport syndrome	Genatlas	88919	H7BXM4:Q01955	NP_000082.2
Core matrisome	Collagens	COL4A3	collagen, type IV, alpha 3 (Goodpasture antigen)	2204	Autosomal recessive Alport syndrome	HGNC	88919	H7BXM4:Q01955	NP_000082.2
Core matrisome	Collagens	COL4A3	collagen, type IV, alpha 3 (Goodpasture antigen)	2204	Autosomal recessive Alport syndrome	OMIM	88919	H7BXM4:Q01955	NP_000082.2
Core matrisome	Collagens	COL4A3	collagen, type IV, alpha 3 (Goodpasture antigen)	2204	Autosomal recessive Alport syndrome	Reactome	88919	H7BXM4:Q01955	NP_000082.2
Core matrisome	Collagens	COL4A3	collagen, type IV, alpha 3 (Goodpasture antigen)	2204	Autosomal recessive Alport syndrome	SwissProt	88919	H7BXM4:Q01955	NP_000082.2
Core matrisome	Collagens	COL4A3	collagen, type IV, alpha 3 (Goodpasture antigen)	2204	Autosomal recessive Alport syndrome	NA	88919	H7BXM4:Q01955	NP_000082.2
Core matrisome	Collagens	COL4A3	collagen, type IV, alpha 3 (Goodpasture antigen)	2204	Autosomal recessive Alport syndrome	Ensembl	88919	H7BXM4:Q01955	NP_000082.2
Core matrisome	Collagens	COL4A3	collagen, type IV, alpha 3 (Goodpasture antigen)	2204	Familial idiopathic steroid-resistant nephrotic syndrome with focal segmental hyalinosis	Ensembl	93213	H7BXM4:Q01955	NP_000082.2
Core matrisome	Collagens	COL4A3	collagen, type IV, alpha 3 (Goodpasture antigen)	2204	Familial idiopathic steroid-resistant nephrotic syndrome with focal segmental hyalinosis	NA	93213	H7BXM4:Q01955	NP_000082.2
Core matrisome	Collagens	COL4A3	collagen, type IV, alpha 3 (Goodpasture antigen)	2204	Familial idiopathic steroid-resistant nephrotic syndrome with focal segmental hyalinosis	Genatlas	93213	H7BXM4:Q01955	NP_000082.2
Core matrisome	Collagens	COL4A3	collagen, type IV, alpha 3 (Goodpasture antigen)	2204	Familial idiopathic steroid-resistant nephrotic syndrome with focal segmental hyalinosis	HGNC	93213	H7BXM4:Q01955	NP_000082.2
Core matrisome	Collagens	COL4A3	collagen, type IV, alpha 3 (Goodpasture antigen)	2204	Familial idiopathic steroid-resistant nephrotic syndrome with focal segmental hyalinosis	OMIM	93213	H7BXM4:Q01955	NP_000082.2
Core matrisome	Collagens	COL4A3	collagen, type IV, alpha 3 (Goodpasture antigen)	2204	Familial idiopathic steroid-resistant nephrotic syndrome with focal segmental hyalinosis	Reactome	93213	H7BXM4:Q01955	NP_000082.2
Core matrisome	Collagens	COL4A3	collagen, type IV, alpha 3 (Goodpasture antigen)	2204	Familial idiopathic steroid-resistant nephrotic syndrome with focal segmental hyalinosis	SwissProt	93213	H7BXM4:Q01955	NP_000082.2
Core matrisome	Collagens	COL4A3	collagen, type IV, alpha 3 (Goodpasture antigen)	2204	Familial idiopathic steroid-resistant nephrotic syndrome with focal segmental hyalinosis	NA	93213	H7BXM4:Q01955	NP_000082.2
Core matrisome	Collagens	COL4A4	collagen, type IV, alpha 4	2206	Autosomal dominant Alport syndrome	NA	88918	J3KNM7:P53420	NP_000083.3:XP_005246338.1
Core matrisome	Collagens	COL4A4	collagen, type IV, alpha 4	2206	Autosomal dominant Alport syndrome	NA	88918	J3KNM7:P53420	NP_000083.3:XP_005246338.1
Core matrisome	Collagens	COL4A4	collagen, type IV, alpha 4	2206	Autosomal dominant Alport syndrome	Genatlas	88918	J3KNM7:P53420	NP_000083.3:XP_005246338.1
Core matrisome	Collagens	COL4A4	collagen, type IV, alpha 4	2206	Autosomal dominant Alport syndrome	HGNC	88918	J3KNM7:P53420	NP_000083.3:XP_005246338.1
Core matrisome	Collagens	COL4A4	collagen, type IV, alpha 4	2206	Autosomal dominant Alport syndrome	OMIM	88918	J3KNM7:P53420	NP_000083.3:XP_005246338.1
Core matrisome	Collagens	COL4A4	collagen, type IV, alpha 4	2206	Autosomal dominant Alport syndrome	Reactome	88918	J3KNM7:P53420	NP_000083.3:XP_005246338.1
Core matrisome	Collagens	COL4A4	collagen, type IV, alpha 4	2206	Autosomal dominant Alport syndrome	SwissProt	88918	J3KNM7:P53420	NP_000083.3:XP_005246338.1
Core matrisome	Collagens	COL4A4	collagen, type IV, alpha 4	2206	Autosomal dominant Alport syndrome	NA	88918	J3KNM7:P53420	NP_000083.3:XP_005246338.1
Core matrisome	Collagens	COL4A4	collagen, type IV, alpha 4	2206	Autosomal dominant Alport syndrome	Ensembl	88918	J3KNM7:P53420	NP_000083.3:XP_005246338.1
Core matrisome	Collagens	COL4A4	collagen, type IV, alpha 4	2206	Autosomal recessive Alport syndrome	NA	88919	J3KNM7:P53420	NP_000083.3:XP_005246338.1
Core matrisome	Collagens	COL4A4	collagen, type IV, alpha 4	2206	Autosomal recessive Alport syndrome	NA	88919	J3KNM7:P53420	NP_000083.3:XP_005246338.1
Core matrisome	Collagens	COL4A4	collagen, type IV, alpha 4	2206	Autosomal recessive Alport syndrome	Genatlas	88919	J3KNM7:P53420	NP_000083.3:XP_005246338.1
Core matrisome	Collagens	COL4A4	collagen, type IV, alpha 4	2206	Autosomal recessive Alport syndrome	HGNC	88919	J3KNM7:P53420	NP_000083.3:XP_005246338.1
Core matrisome	Collagens	COL4A4	collagen, type IV, alpha 4	2206	Autosomal recessive Alport syndrome	OMIM	88919	J3KNM7:P53420	NP_000083.3:XP_005246338.1
Core matrisome	Collagens	COL4A4	collagen, type IV, alpha 4	2206	Autosomal recessive Alport syndrome	Reactome	88919	J3KNM7:P53420	NP_000083.3:XP_005246338.1
Core matrisome	Collagens	COL4A4	collagen, type IV, alpha 4	2206	Autosomal recessive Alport syndrome	SwissProt	88919	J3KNM7:P53420	NP_000083.3:XP_005246338.1
Core matrisome	Collagens	COL4A4	collagen, type IV, alpha 4	2206	Autosomal recessive Alport syndrome	NA	88919	J3KNM7:P53420	NP_000083.3:XP_005246338.1
Core matrisome	Collagens	COL4A4	collagen, type IV, alpha 4	2206	Autosomal recessive Alport syndrome	Ensembl	88919	J3KNM7:P53420	NP_000083.3:XP_005246338.1
Core matrisome	Collagens	COL4A5	collagen, type IV, alpha 5	2207	X-linked Alport syndrome	Ensembl	88917	H0Y998:H0Y9H0:H0Y9R8:P29400	NP_000486.1:NP_203699.1:XP_006724679.1
Core matrisome	Collagens	COL4A5	collagen, type IV, alpha 5	2207	X-linked Alport syndrome	NA	88917	H0Y998:H0Y9H0:H0Y9R8:P29400	NP_000486.1:NP_203699.1:XP_006724679.1
Core matrisome	Collagens	COL4A5	collagen, type IV, alpha 5	2207	X-linked Alport syndrome	Genatlas	88917	H0Y998:H0Y9H0:H0Y9R8:P29400	NP_000486.1:NP_203699.1:XP_006724679.1
Core matrisome	Collagens	COL4A5	collagen, type IV, alpha 5	2207	X-linked Alport syndrome	HGNC	88917	H0Y998:H0Y9H0:H0Y9R8:P29400	NP_000486.1:NP_203699.1:XP_006724679.1
Core matrisome	Collagens	COL4A5	collagen, type IV, alpha 5	2207	X-linked Alport syndrome	OMIM	88917	H0Y998:H0Y9H0:H0Y9R8:P29400	NP_000486.1:NP_203699.1:XP_006724679.1
Core matrisome	Collagens	COL4A5	collagen, type IV, alpha 5	2207	X-linked Alport syndrome	Reactome	88917	H0Y998:H0Y9H0:H0Y9R8:P29400	NP_000486.1:NP_203699.1:XP_006724679.1
Core matrisome	Collagens	COL4A5	collagen, type IV, alpha 5	2207	X-linked Alport syndrome	SwissProt	88917	H0Y998:H0Y9H0:H0Y9R8:P29400	NP_000486.1:NP_203699.1:XP_006724679.1
Core matrisome	Collagens	COL4A5	collagen, type IV, alpha 5	2207	X-linked Alport syndrome	NA	88917	H0Y998:H0Y9H0:H0Y9R8:P29400	NP_000486.1:NP_203699.1:XP_006724679.1
Core matrisome	Collagens	COL4A5	collagen, type IV, alpha 5	2207	X-linked Alport syndrome-diffuse leiomyomatosis	Ensembl	1018	H0Y998:H0Y9H0:H0Y9R8:P29400	NP_000486.1:NP_203699.1:XP_006724679.1
Core matrisome	Collagens	COL4A5	collagen, type IV, alpha 5	2207	X-linked Alport syndrome-diffuse leiomyomatosis	NA	1018	H0Y998:H0Y9H0:H0Y9R8:P29400	NP_000486.1:NP_203699.1:XP_006724679.1
Core matrisome	Collagens	COL4A5	collagen, type IV, alpha 5	2207	X-linked Alport syndrome-diffuse leiomyomatosis	Genatlas	1018	H0Y998:H0Y9H0:H0Y9R8:P29400	NP_000486.1:NP_203699.1:XP_006724679.1
Core matrisome	Collagens	COL4A5	collagen, type IV, alpha 5	2207	X-linked Alport syndrome-diffuse leiomyomatosis	HGNC	1018	H0Y998:H0Y9H0:H0Y9R8:P29400	NP_000486.1:NP_203699.1:XP_006724679.1
Core matrisome	Collagens	COL4A5	collagen, type IV, alpha 5	2207	X-linked Alport syndrome-diffuse leiomyomatosis	OMIM	1018	H0Y998:H0Y9H0:H0Y9R8:P29400	NP_000486.1:NP_203699.1:XP_006724679.1
Core matrisome	Collagens	COL4A5	collagen, type IV, alpha 5	2207	X-linked Alport syndrome-diffuse leiomyomatosis	Reactome	1018	H0Y998:H0Y9H0:H0Y9R8:P29400	NP_000486.1:NP_203699.1:XP_006724679.1
Core matrisome	Collagens	COL4A5	collagen, type IV, alpha 5	2207	X-linked Alport syndrome-diffuse leiomyomatosis	SwissProt	1018	H0Y998:H0Y9H0:H0Y9R8:P29400	NP_000486.1:NP_203699.1:XP_006724679.1
Core matrisome	Collagens	COL4A5	collagen, type IV, alpha 5	2207	X-linked Alport syndrome-diffuse leiomyomatosis	NA	1018	H0Y998:H0Y9H0:H0Y9R8:P29400	NP_000486.1:NP_203699.1:XP_006724679.1
Core matrisome	Collagens	COL4A6	collagen, type IV, alpha 6	2208	X-linked Alport syndrome-diffuse leiomyomatosis	Ensembl	1018	A8MXH5:B4DZ39:F5H3Q5:F5H851:Q14031	NP_001274688.1:NP_001274689.1:NP_001274689.1:NP_001838.2:NP_378667.1
Core matrisome	Collagens	COL4A6	collagen, type IV, alpha 6	2208	X-linked Alport syndrome-diffuse leiomyomatosis	NA	1018	A8MXH5:B4DZ39:F5H3Q5:F5H851:Q14031	NP_001274688.1:NP_001274689.1:NP_001274689.1:NP_001838.2:NP_378667.1
Core matrisome	Collagens	COL4A6	collagen, type IV, alpha 6	2208	X-linked Alport syndrome-diffuse leiomyomatosis	HGNC	1018	A8MXH5:B4DZ39:F5H3Q5:F5H851:Q14031	NP_001274688.1:NP_001274689.1:NP_001274689.1:NP_001838.2:NP_378667.1
Core matrisome	Collagens	COL4A6	collagen, type IV, alpha 6	2208	X-linked Alport syndrome-diffuse leiomyomatosis	OMIM	1018	A8MXH5:B4DZ39:F5H3Q5:F5H851:Q14031	NP_001274688.1:NP_001274689.1:NP_001274689.1:NP_001838.2:NP_378667.1
Core matrisome	Collagens	COL4A6	collagen, type IV, alpha 6	2208	X-linked Alport syndrome-diffuse leiomyomatosis	Reactome	1018	A8MXH5:B4DZ39:F5H3Q5:F5H851:Q14031	NP_001274688.1:NP_001274689.1:NP_001274689.1:NP_001838.2:NP_378667.1
Core matrisome	Collagens	COL4A6	collagen, type IV, alpha 6	2208	X-linked Alport syndrome-diffuse leiomyomatosis	SwissProt	1018	A8MXH5:B4DZ39:F5H3Q5:F5H851:Q14031	NP_001274688.1:NP_001274689.1:NP_001274689.1:NP_001838.2:NP_378667.1
Core matrisome	Collagens	COL4A6	collagen, type IV, alpha 6	2208	X-linked Alport syndrome-diffuse leiomyomatosis	Genatlas	1018	A8MXH5:B4DZ39:F5H3Q5:F5H851:Q14031	NP_001274688.1:NP_001274689.1:NP_001274689.1:NP_001838.2:NP_378667.1
Core matrisome	Collagens	COL4A6	collagen, type IV, alpha 6	2208	X-linked Alport syndrome-diffuse leiomyomatosis	NA	1018	A8MXH5:B4DZ39:F5H3Q5:F5H851:Q14031	NP_001274688.1:NP_001274689.1:NP_001274689.1:NP_001838.2:NP_378667.1
Core matrisome	Collagens	COL4A6	collagen, type IV, alpha 6	2208	X-linked non-syndromic sensorineural deafness type DFN	Ensembl	90625	A8MXH5:B4DZ39:F5H3Q5:F5H851:Q14031	NP_001274688.1:NP_001274689.1:NP_001274689.1:NP_001838.2:NP_378667.1
Core matrisome	Collagens	COL4A6	collagen, type IV, alpha 6	2208	X-linked non-syndromic sensorineural deafness type DFN	NA	90625	A8MXH5:B4DZ39:F5H3Q5:F5H851:Q14031	NP_001274688.1:NP_001274689.1:NP_001274689.1:NP_001838.2:NP_378667.1
Core matrisome	Collagens	COL4A6	collagen, type IV, alpha 6	2208	X-linked non-syndromic sensorineural deafness type DFN	HGNC	90625	A8MXH5:B4DZ39:F5H3Q5:F5H851:Q14031	NP_001274688.1:NP_001274689.1:NP_001274689.1:NP_001838.2:NP_378667.1
Core matrisome	Collagens	COL4A6	collagen, type IV, alpha 6	2208	X-linked non-syndromic sensorineural deafness type DFN	OMIM	90625	A8MXH5:B4DZ39:F5H3Q5:F5H851:Q14031	NP_001274688.1:NP_001274689.1:NP_001274689.1:NP_001838.2:NP_378667.1
Core matrisome	Collagens	COL4A6	collagen, type IV, alpha 6	2208	X-linked non-syndromic sensorineural deafness type DFN	Reactome	90625	A8MXH5:B4DZ39:F5H3Q5:F5H851:Q14031	NP_001274688.1:NP_001274689.1:NP_001274689.1:NP_001838.2:NP_378667.1
Core matrisome	Collagens	COL4A6	collagen, type IV, alpha 6	2208	X-linked non-syndromic sensorineural deafness type DFN	SwissProt	90625	A8MXH5:B4DZ39:F5H3Q5:F5H851:Q14031	NP_001274688.1:NP_001274689.1:NP_001274689.1:NP_001838.2:NP_378667.1
Core matrisome	Collagens	COL4A6	collagen, type IV, alpha 6	2208	X-linked non-syndromic sensorineural deafness type DFN	Genatlas	90625	A8MXH5:B4DZ39:F5H3Q5:F5H851:Q14031	NP_001274688.1:NP_001274689.1:NP_001274689.1:NP_001838.2:NP_378667.1
Core matrisome	Collagens	COL4A6	collagen, type IV, alpha 6	2208	X-linked non-syndromic sensorineural deafness type DFN	NA	90625	A8MXH5:B4DZ39:F5H3Q5:F5H851:Q14031	NP_001274688.1:NP_001274689.1:NP_001274689.1:NP_001838.2:NP_378667.1
Core matrisome	Collagens	COL5A1	collagen, type V, alpha 1	2209	Ehlers-Danlos syndrome type 1	Ensembl	90309	H7BY82:P20908	NP_000084.3
Core matrisome	Collagens	COL5A1	collagen, type V, alpha 1	2209	Ehlers-Danlos syndrome type 1	NA	90309	H7BY82:P20908	NP_000084.3
Core matrisome	Collagens	COL5A1	collagen, type V, alpha 1	2209	Ehlers-Danlos syndrome type 1	Genatlas	90309	H7BY82:P20908	NP_000084.3
Core matrisome	Collagens	COL5A1	collagen, type V, alpha 1	2209	Ehlers-Danlos syndrome type 1	HGNC	90309	H7BY82:P20908	NP_000084.3
Core matrisome	Collagens	COL5A1	collagen, type V, alpha 1	2209	Ehlers-Danlos syndrome type 1	OMIM	90309	H7BY82:P20908	NP_000084.3
Core matrisome	Collagens	COL5A1	collagen, type V, alpha 1	2209	Ehlers-Danlos syndrome type 1	Reactome	90309	H7BY82:P20908	NP_000084.3
Core matrisome	Collagens	COL5A1	collagen, type V, alpha 1	2209	Ehlers-Danlos syndrome type 1	SwissProt	90309	H7BY82:P20908	NP_000084.3
Core matrisome	Collagens	COL5A1	collagen, type V, alpha 1	2209	Ehlers-Danlos syndrome type 1	NA	90309	H7BY82:P20908	NP_000084.3
Core matrisome	Collagens	COL5A1	collagen, type V, alpha 1	2209	Ehlers-Danlos syndrome type 2	Ensembl	90318	H7BY82:P20908	NP_000084.3
Core matrisome	Collagens	COL5A1	collagen, type V, alpha 1	2209	Ehlers-Danlos syndrome type 2	NA	90318	H7BY82:P20908	NP_000084.3
Core matrisome	Collagens	COL5A1	collagen, type V, alpha 1	2209	Ehlers-Danlos syndrome type 2	Genatlas	90318	H7BY82:P20908	NP_000084.3
Core matrisome	Collagens	COL5A1	collagen, type V, alpha 1	2209	Ehlers-Danlos syndrome type 2	HGNC	90318	H7BY82:P20908	NP_000084.3
Core matrisome	Collagens	COL5A1	collagen, type V, alpha 1	2209	Ehlers-Danlos syndrome type 2	OMIM	90318	H7BY82:P20908	NP_000084.3
Core matrisome	Collagens	COL5A1	collagen, type V, alpha 1	2209	Ehlers-Danlos syndrome type 2	Reactome	90318	H7BY82:P20908	NP_000084.3
Core matrisome	Collagens	COL5A1	collagen, type V, alpha 1	2209	Ehlers-Danlos syndrome type 2	SwissProt	90318	H7BY82:P20908	NP_000084.3
Core matrisome	Collagens	COL5A1	collagen, type V, alpha 1	2209	Ehlers-Danlos syndrome type 2	NA	90318	H7BY82:P20908	NP_000084.3
Core matrisome	Collagens	COL5A1	collagen, type V, alpha 1	2209	Ehlers-Danlos syndrome, vascular type	Ensembl	286	H7BY82:P20908	NP_000084.3
Core matrisome	Collagens	COL5A1	collagen, type V, alpha 1	2209	Ehlers-Danlos syndrome, vascular type	NA	286	H7BY82:P20908	NP_000084.3
Core matrisome	Collagens	COL5A1	collagen, type V, alpha 1	2209	Ehlers-Danlos syndrome, vascular type	Genatlas	286	H7BY82:P20908	NP_000084.3
Core matrisome	Collagens	COL5A1	collagen, type V, alpha 1	2209	Ehlers-Danlos syndrome, vascular type	HGNC	286	H7BY82:P20908	NP_000084.3
Core matrisome	Collagens	COL5A1	collagen, type V, alpha 1	2209	Ehlers-Danlos syndrome, vascular type	OMIM	286	H7BY82:P20908	NP_000084.3
Core matrisome	Collagens	COL5A1	collagen, type V, alpha 1	2209	Ehlers-Danlos syndrome, vascular type	Reactome	286	H7BY82:P20908	NP_000084.3
Core matrisome	Collagens	COL5A1	collagen, type V, alpha 1	2209	Ehlers-Danlos syndrome, vascular type	SwissProt	286	H7BY82:P20908	NP_000084.3
Core matrisome	Collagens	COL5A1	collagen, type V, alpha 1	2209	Ehlers-Danlos syndrome, vascular type	NA	286	H7BY82:P20908	NP_000084.3
Core matrisome	Collagens	COL5A2	collagen, type V, alpha 2	2210	Ehlers-Danlos syndrome type 1	Ensembl	90309	P05997	NP_000384.2
Core matrisome	Collagens	COL5A2	collagen, type V, alpha 2	2210	Ehlers-Danlos syndrome type 1	NA	90309	P05997	NP_000384.2
Core matrisome	Collagens	COL5A2	collagen, type V, alpha 2	2210	Ehlers-Danlos syndrome type 1	Genatlas	90309	P05997	NP_000384.2
Core matrisome	Collagens	COL5A2	collagen, type V, alpha 2	2210	Ehlers-Danlos syndrome type 1	HGNC	90309	P05997	NP_000384.2
Core matrisome	Collagens	COL5A2	collagen, type V, alpha 2	2210	Ehlers-Danlos syndrome type 1	OMIM	90309	P05997	NP_000384.2
Core matrisome	Collagens	COL5A2	collagen, type V, alpha 2	2210	Ehlers-Danlos syndrome type 1	Reactome	90309	P05997	NP_000384.2
Core matrisome	Collagens	COL5A2	collagen, type V, alpha 2	2210	Ehlers-Danlos syndrome type 1	SwissProt	90309	P05997	NP_000384.2
Core matrisome	Collagens	COL5A2	collagen, type V, alpha 2	2210	Ehlers-Danlos syndrome type 1	NA	90309	P05997	NP_000384.2
Core matrisome	Collagens	COL5A2	collagen, type V, alpha 2	2210	Ehlers-Danlos syndrome type 2	Ensembl	90318	P05997	NP_000384.2
Core matrisome	Collagens	COL5A2	collagen, type V, alpha 2	2210	Ehlers-Danlos syndrome type 2	NA	90318	P05997	NP_000384.2
Core matrisome	Collagens	COL5A2	collagen, type V, alpha 2	2210	Ehlers-Danlos syndrome type 2	Genatlas	90318	P05997	NP_000384.2
Core matrisome	Collagens	COL5A2	collagen, type V, alpha 2	2210	Ehlers-Danlos syndrome type 2	HGNC	90318	P05997	NP_000384.2
Core matrisome	Collagens	COL5A2	collagen, type V, alpha 2	2210	Ehlers-Danlos syndrome type 2	OMIM	90318	P05997	NP_000384.2
Core matrisome	Collagens	COL5A2	collagen, type V, alpha 2	2210	Ehlers-Danlos syndrome type 2	Reactome	90318	P05997	NP_000384.2
Core matrisome	Collagens	COL5A2	collagen, type V, alpha 2	2210	Ehlers-Danlos syndrome type 2	SwissProt	90318	P05997	NP_000384.2
Core matrisome	Collagens	COL5A2	collagen, type V, alpha 2	2210	Ehlers-Danlos syndrome type 2	NA	90318	P05997	NP_000384.2
Core matrisome	Collagens	COL6A1	collagen, type VI, alpha 1	2211	Bethlem myopathy	NA	610	P12109	NP_001839.2
Core matrisome	Collagens	COL6A1	collagen, type VI, alpha 1	2211	Bethlem myopathy	SwissProt	610	P12109	NP_001839.2
Core matrisome	Collagens	COL6A1	collagen, type VI, alpha 1	2211	Bethlem myopathy	Genatlas	610	P12109	NP_001839.2
Core matrisome	Collagens	COL6A1	collagen, type VI, alpha 1	2211	Bethlem myopathy	HGNC	610	P12109	NP_001839.2
Core matrisome	Collagens	COL6A1	collagen, type VI, alpha 1	2211	Bethlem myopathy	OMIM	610	P12109	NP_001839.2
Core matrisome	Collagens	COL6A1	collagen, type VI, alpha 1	2211	Bethlem myopathy	Reactome	610	P12109	NP_001839.2
Core matrisome	Collagens	COL6A1	collagen, type VI, alpha 1	2211	Bethlem myopathy	NA	610	P12109	NP_001839.2
Core matrisome	Collagens	COL6A1	collagen, type VI, alpha 1	2211	Bethlem myopathy	Ensembl	610	P12109	NP_001839.2
Core matrisome	Collagens	COL6A1	collagen, type VI, alpha 1	2211	Congenital muscular dystrophy, Ullrich type	Ensembl	75840	P12109	NP_001839.2
Core matrisome	Collagens	COL6A1	collagen, type VI, alpha 1	2211	Congenital muscular dystrophy, Ullrich type	NA	75840	P12109	NP_001839.2
Core matrisome	Collagens	COL6A1	collagen, type VI, alpha 1	2211	Congenital muscular dystrophy, Ullrich type	SwissProt	75840	P12109	NP_001839.2
Core matrisome	Collagens	COL6A1	collagen, type VI, alpha 1	2211	Congenital muscular dystrophy, Ullrich type	Genatlas	75840	P12109	NP_001839.2
Core matrisome	Collagens	COL6A1	collagen, type VI, alpha 1	2211	Congenital muscular dystrophy, Ullrich type	HGNC	75840	P12109	NP_001839.2
Core matrisome	Collagens	COL6A1	collagen, type VI, alpha 1	2211	Congenital muscular dystrophy, Ullrich type	OMIM	75840	P12109	NP_001839.2
Core matrisome	Collagens	COL6A1	collagen, type VI, alpha 1	2211	Congenital muscular dystrophy, Ullrich type	Reactome	75840	P12109	NP_001839.2
Core matrisome	Collagens	COL6A1	collagen, type VI, alpha 1	2211	Congenital muscular dystrophy, Ullrich type	NA	75840	P12109	NP_001839.2
Core matrisome	Collagens	COL6A2	collagen, type VI, alpha 2	2212	Bethlem myopathy	NA	610	C9JH44:H7C0M5:P12110	NP_001840.3:NP_478054.2:NP_478055.2
Core matrisome	Collagens	COL6A2	collagen, type VI, alpha 2	2212	Bethlem myopathy	Genatlas	610	C9JH44:H7C0M5:P12110	NP_001840.3:NP_478054.2:NP_478055.2
Core matrisome	Collagens	COL6A2	collagen, type VI, alpha 2	2212	Bethlem myopathy	HGNC	610	C9JH44:H7C0M5:P12110	NP_001840.3:NP_478054.2:NP_478055.2
Core matrisome	Collagens	COL6A2	collagen, type VI, alpha 2	2212	Bethlem myopathy	OMIM	610	C9JH44:H7C0M5:P12110	NP_001840.3:NP_478054.2:NP_478055.2
Core matrisome	Collagens	COL6A2	collagen, type VI, alpha 2	2212	Bethlem myopathy	Reactome	610	C9JH44:H7C0M5:P12110	NP_001840.3:NP_478054.2:NP_478055.2
Core matrisome	Collagens	COL6A2	collagen, type VI, alpha 2	2212	Bethlem myopathy	SwissProt	610	C9JH44:H7C0M5:P12110	NP_001840.3:NP_478054.2:NP_478055.2
Core matrisome	Collagens	COL6A2	collagen, type VI, alpha 2	2212	Bethlem myopathy	NA	610	C9JH44:H7C0M5:P12110	NP_001840.3:NP_478054.2:NP_478055.2
Core matrisome	Collagens	COL6A2	collagen, type VI, alpha 2	2212	Bethlem myopathy	Ensembl	610	C9JH44:H7C0M5:P12110	NP_001840.3:NP_478054.2:NP_478055.2
Core matrisome	Collagens	COL6A2	collagen, type VI, alpha 2	2212	Congenital muscular dystrophy, Ullrich type	Ensembl	75840	C9JH44:H7C0M5:P12110	NP_001840.3:NP_478054.2:NP_478055.2
Core matrisome	Collagens	COL6A2	collagen, type VI, alpha 2	2212	Congenital muscular dystrophy, Ullrich type	NA	75840	C9JH44:H7C0M5:P12110	NP_001840.3:NP_478054.2:NP_478055.2
Core matrisome	Collagens	COL6A2	collagen, type VI, alpha 2	2212	Congenital muscular dystrophy, Ullrich type	Genatlas	75840	C9JH44:H7C0M5:P12110	NP_001840.3:NP_478054.2:NP_478055.2
Core matrisome	Collagens	COL6A2	collagen, type VI, alpha 2	2212	Congenital muscular dystrophy, Ullrich type	HGNC	75840	C9JH44:H7C0M5:P12110	NP_001840.3:NP_478054.2:NP_478055.2
Core matrisome	Collagens	COL6A2	collagen, type VI, alpha 2	2212	Congenital muscular dystrophy, Ullrich type	OMIM	75840	C9JH44:H7C0M5:P12110	NP_001840.3:NP_478054.2:NP_478055.2
Core matrisome	Collagens	COL6A2	collagen, type VI, alpha 2	2212	Congenital muscular dystrophy, Ullrich type	Reactome	75840	C9JH44:H7C0M5:P12110	NP_001840.3:NP_478054.2:NP_478055.2
Core matrisome	Collagens	COL6A2	collagen, type VI, alpha 2	2212	Congenital muscular dystrophy, Ullrich type	SwissProt	75840	C9JH44:H7C0M5:P12110	NP_001840.3:NP_478054.2:NP_478055.2
Core matrisome	Collagens	COL6A2	collagen, type VI, alpha 2	2212	Congenital muscular dystrophy, Ullrich type	NA	75840	C9JH44:H7C0M5:P12110	NP_001840.3:NP_478054.2:NP_478055.2
Core matrisome	Collagens	COL6A2	collagen, type VI, alpha 2	2212	Myosclerosis	Ensembl	289380	C9JH44:H7C0M5:P12110	NP_001840.3:NP_478054.2:NP_478055.2
Core matrisome	Collagens	COL6A2	collagen, type VI, alpha 2	2212	Myosclerosis	NA	289380	C9JH44:H7C0M5:P12110	NP_001840.3:NP_478054.2:NP_478055.2
Core matrisome	Collagens	COL6A2	collagen, type VI, alpha 2	2212	Myosclerosis	Genatlas	289380	C9JH44:H7C0M5:P12110	NP_001840.3:NP_478054.2:NP_478055.2
Core matrisome	Collagens	COL6A2	collagen, type VI, alpha 2	2212	Myosclerosis	HGNC	289380	C9JH44:H7C0M5:P12110	NP_001840.3:NP_478054.2:NP_478055.2
Core matrisome	Collagens	COL6A2	collagen, type VI, alpha 2	2212	Myosclerosis	OMIM	289380	C9JH44:H7C0M5:P12110	NP_001840.3:NP_478054.2:NP_478055.2
Core matrisome	Collagens	COL6A2	collagen, type VI, alpha 2	2212	Myosclerosis	Reactome	289380	C9JH44:H7C0M5:P12110	NP_001840.3:NP_478054.2:NP_478055.2
Core matrisome	Collagens	COL6A2	collagen, type VI, alpha 2	2212	Myosclerosis	SwissProt	289380	C9JH44:H7C0M5:P12110	NP_001840.3:NP_478054.2:NP_478055.2
Core matrisome	Collagens	COL6A2	collagen, type VI, alpha 2	2212	Myosclerosis	NA	289380	C9JH44:H7C0M5:P12110	NP_001840.3:NP_478054.2:NP_478055.2
Core matrisome	Collagens	COL6A3	collagen, type VI, alpha 3	2213	Bethlem myopathy	NA	610	C9JNG9:E7ENL6:E9PCV6:I3L392:P12111	NP_004360.2:NP_476505.3:NP_476506.3:NP_476507.3:NP_476508.2:XP_005246122.1
Core matrisome	Collagens	COL6A3	collagen, type VI, alpha 3	2213	Bethlem myopathy	Genatlas	610	C9JNG9:E7ENL6:E9PCV6:I3L392:P12111	NP_004360.2:NP_476505.3:NP_476506.3:NP_476507.3:NP_476508.2:XP_005246122.1
Core matrisome	Collagens	COL6A3	collagen, type VI, alpha 3	2213	Bethlem myopathy	HGNC	610	C9JNG9:E7ENL6:E9PCV6:I3L392:P12111	NP_004360.2:NP_476505.3:NP_476506.3:NP_476507.3:NP_476508.2:XP_005246122.1
Core matrisome	Collagens	COL6A3	collagen, type VI, alpha 3	2213	Bethlem myopathy	OMIM	610	C9JNG9:E7ENL6:E9PCV6:I3L392:P12111	NP_004360.2:NP_476505.3:NP_476506.3:NP_476507.3:NP_476508.2:XP_005246122.1
Core matrisome	Collagens	COL6A3	collagen, type VI, alpha 3	2213	Bethlem myopathy	Reactome	610	C9JNG9:E7ENL6:E9PCV6:I3L392:P12111	NP_004360.2:NP_476505.3:NP_476506.3:NP_476507.3:NP_476508.2:XP_005246122.1
Core matrisome	Collagens	COL6A3	collagen, type VI, alpha 3	2213	Bethlem myopathy	SwissProt	610	C9JNG9:E7ENL6:E9PCV6:I3L392:P12111	NP_004360.2:NP_476505.3:NP_476506.3:NP_476507.3:NP_476508.2:XP_005246122.1
Core matrisome	Collagens	COL6A3	collagen, type VI, alpha 3	2213	Bethlem myopathy	NA	610	C9JNG9:E7ENL6:E9PCV6:I3L392:P12111	NP_004360.2:NP_476505.3:NP_476506.3:NP_476507.3:NP_476508.2:XP_005246122.1
Core matrisome	Collagens	COL6A3	collagen, type VI, alpha 3	2213	Bethlem myopathy	Ensembl	610	C9JNG9:E7ENL6:E9PCV6:I3L392:P12111	NP_004360.2:NP_476505.3:NP_476506.3:NP_476507.3:NP_476508.2:XP_005246122.1
Core matrisome	Collagens	COL6A3	collagen, type VI, alpha 3	2213	Congenital muscular dystrophy, Ullrich type	Ensembl	75840	C9JNG9:E7ENL6:E9PCV6:I3L392:P12111	NP_004360.2:NP_476505.3:NP_476506.3:NP_476507.3:NP_476508.2:XP_005246122.1
Core matrisome	Collagens	COL6A3	collagen, type VI, alpha 3	2213	Congenital muscular dystrophy, Ullrich type	NA	75840	C9JNG9:E7ENL6:E9PCV6:I3L392:P12111	NP_004360.2:NP_476505.3:NP_476506.3:NP_476507.3:NP_476508.2:XP_005246122.1
Core matrisome	Collagens	COL6A3	collagen, type VI, alpha 3	2213	Congenital muscular dystrophy, Ullrich type	Genatlas	75840	C9JNG9:E7ENL6:E9PCV6:I3L392:P12111	NP_004360.2:NP_476505.3:NP_476506.3:NP_476507.3:NP_476508.2:XP_005246122.1
Core matrisome	Collagens	COL6A3	collagen, type VI, alpha 3	2213	Congenital muscular dystrophy, Ullrich type	HGNC	75840	C9JNG9:E7ENL6:E9PCV6:I3L392:P12111	NP_004360.2:NP_476505.3:NP_476506.3:NP_476507.3:NP_476508.2:XP_005246122.1
Core matrisome	Collagens	COL6A3	collagen, type VI, alpha 3	2213	Congenital muscular dystrophy, Ullrich type	OMIM	75840	C9JNG9:E7ENL6:E9PCV6:I3L392:P12111	NP_004360.2:NP_476505.3:NP_476506.3:NP_476507.3:NP_476508.2:XP_005246122.1
Core matrisome	Collagens	COL6A3	collagen, type VI, alpha 3	2213	Congenital muscular dystrophy, Ullrich type	Reactome	75840	C9JNG9:E7ENL6:E9PCV6:I3L392:P12111	NP_004360.2:NP_476505.3:NP_476506.3:NP_476507.3:NP_476508.2:XP_005246122.1
Core matrisome	Collagens	COL6A3	collagen, type VI, alpha 3	2213	Congenital muscular dystrophy, Ullrich type	SwissProt	75840	C9JNG9:E7ENL6:E9PCV6:I3L392:P12111	NP_004360.2:NP_476505.3:NP_476506.3:NP_476507.3:NP_476508.2:XP_005246122.1
Core matrisome	Collagens	COL6A3	collagen, type VI, alpha 3	2213	Congenital muscular dystrophy, Ullrich type	NA	75840	C9JNG9:E7ENL6:E9PCV6:I3L392:P12111	NP_004360.2:NP_476505.3:NP_476506.3:NP_476507.3:NP_476508.2:XP_005246122.1
Core matrisome	Collagens	COL6A3	collagen, type VI, alpha 3	2213	Primary dystonia, DYT27 type	Ensembl	464440	C9JNG9:E7ENL6:E9PCV6:I3L392:P12111	NP_004360.2:NP_476505.3:NP_476506.3:NP_476507.3:NP_476508.2:XP_005246122.1
Core matrisome	Collagens	COL6A3	collagen, type VI, alpha 3	2213	Primary dystonia, DYT27 type	NA	464440	C9JNG9:E7ENL6:E9PCV6:I3L392:P12111	NP_004360.2:NP_476505.3:NP_476506.3:NP_476507.3:NP_476508.2:XP_005246122.1
Core matrisome	Collagens	COL6A3	collagen, type VI, alpha 3	2213	Primary dystonia, DYT27 type	Genatlas	464440	C9JNG9:E7ENL6:E9PCV6:I3L392:P12111	NP_004360.2:NP_476505.3:NP_476506.3:NP_476507.3:NP_476508.2:XP_005246122.1
Core matrisome	Collagens	COL6A3	collagen, type VI, alpha 3	2213	Primary dystonia, DYT27 type	HGNC	464440	C9JNG9:E7ENL6:E9PCV6:I3L392:P12111	NP_004360.2:NP_476505.3:NP_476506.3:NP_476507.3:NP_476508.2:XP_005246122.1
Core matrisome	Collagens	COL6A3	collagen, type VI, alpha 3	2213	Primary dystonia, DYT27 type	OMIM	464440	C9JNG9:E7ENL6:E9PCV6:I3L392:P12111	NP_004360.2:NP_476505.3:NP_476506.3:NP_476507.3:NP_476508.2:XP_005246122.1
Core matrisome	Collagens	COL6A3	collagen, type VI, alpha 3	2213	Primary dystonia, DYT27 type	Reactome	464440	C9JNG9:E7ENL6:E9PCV6:I3L392:P12111	NP_004360.2:NP_476505.3:NP_476506.3:NP_476507.3:NP_476508.2:XP_005246122.1
Core matrisome	Collagens	COL6A3	collagen, type VI, alpha 3	2213	Primary dystonia, DYT27 type	SwissProt	464440	C9JNG9:E7ENL6:E9PCV6:I3L392:P12111	NP_004360.2:NP_476505.3:NP_476506.3:NP_476507.3:NP_476508.2:XP_005246122.1
Core matrisome	Collagens	COL6A3	collagen, type VI, alpha 3	2213	Primary dystonia, DYT27 type	NA	464440	C9JNG9:E7ENL6:E9PCV6:I3L392:P12111	NP_004360.2:NP_476505.3:NP_476506.3:NP_476507.3:NP_476508.2:XP_005246122.1
Core matrisome	Collagens	COL7A1	collagen, type VII, alpha 1	2214	Acral dystrophic epidermolysis bullosa	NA	158673	C9JBL3:Q02388	NP_000085.1
Core matrisome	Collagens	COL7A1	collagen, type VII, alpha 1	2214	Acral dystrophic epidermolysis bullosa	NA	158673	C9JBL3:Q02388	NP_000085.1
Core matrisome	Collagens	COL7A1	collagen, type VII, alpha 1	2214	Acral dystrophic epidermolysis bullosa	Genatlas	158673	C9JBL3:Q02388	NP_000085.1
Core matrisome	Collagens	COL7A1	collagen, type VII, alpha 1	2214	Acral dystrophic epidermolysis bullosa	HGNC	158673	C9JBL3:Q02388	NP_000085.1
Core matrisome	Collagens	COL7A1	collagen, type VII, alpha 1	2214	Acral dystrophic epidermolysis bullosa	OMIM	158673	C9JBL3:Q02388	NP_000085.1
Core matrisome	Collagens	COL7A1	collagen, type VII, alpha 1	2214	Acral dystrophic epidermolysis bullosa	Reactome	158673	C9JBL3:Q02388	NP_000085.1
Core matrisome	Collagens	COL7A1	collagen, type VII, alpha 1	2214	Acral dystrophic epidermolysis bullosa	SwissProt	158673	C9JBL3:Q02388	NP_000085.1
Core matrisome	Collagens	COL7A1	collagen, type VII, alpha 1	2214	Acral dystrophic epidermolysis bullosa	NA	158673	C9JBL3:Q02388	NP_000085.1
Core matrisome	Collagens	COL7A1	collagen, type VII, alpha 1	2214	Acral dystrophic epidermolysis bullosa	Ensembl	158673	C9JBL3:Q02388	NP_000085.1
Core matrisome	Collagens	COL7A1	collagen, type VII, alpha 1	2214	Centripetalis recessive dystrophic epidermolysis bullosa	NA	89841	C9JBL3:Q02388	NP_000085.1
Core matrisome	Collagens	COL7A1	collagen, type VII, alpha 1	2214	Centripetalis recessive dystrophic epidermolysis bullosa	NA	89841	C9JBL3:Q02388	NP_000085.1
Core matrisome	Collagens	COL7A1	collagen, type VII, alpha 1	2214	Centripetalis recessive dystrophic epidermolysis bullosa	Genatlas	89841	C9JBL3:Q02388	NP_000085.1
Core matrisome	Collagens	COL7A1	collagen, type VII, alpha 1	2214	Centripetalis recessive dystrophic epidermolysis bullosa	HGNC	89841	C9JBL3:Q02388	NP_000085.1
Core matrisome	Collagens	COL7A1	collagen, type VII, alpha 1	2214	Centripetalis recessive dystrophic epidermolysis bullosa	OMIM	89841	C9JBL3:Q02388	NP_000085.1
Core matrisome	Collagens	COL7A1	collagen, type VII, alpha 1	2214	Centripetalis recessive dystrophic epidermolysis bullosa	Reactome	89841	C9JBL3:Q02388	NP_000085.1
Core matrisome	Collagens	COL7A1	collagen, type VII, alpha 1	2214	Centripetalis recessive dystrophic epidermolysis bullosa	SwissProt	89841	C9JBL3:Q02388	NP_000085.1
Core matrisome	Collagens	COL7A1	collagen, type VII, alpha 1	2214	Centripetalis recessive dystrophic epidermolysis bullosa	NA	89841	C9JBL3:Q02388	NP_000085.1
Core matrisome	Collagens	COL7A1	collagen, type VII, alpha 1	2214	Centripetalis recessive dystrophic epidermolysis bullosa	Ensembl	89841	C9JBL3:Q02388	NP_000085.1
Core matrisome	Collagens	COL7A1	collagen, type VII, alpha 1	2214	Dominant dystrophic epidermolysis bullosa, nails only	Ensembl	158676	C9JBL3:Q02388	NP_000085.1
Core matrisome	Collagens	COL7A1	collagen, type VII, alpha 1	2214	Dominant dystrophic epidermolysis bullosa, nails only	NA	158676	C9JBL3:Q02388	NP_000085.1
Core matrisome	Collagens	COL7A1	collagen, type VII, alpha 1	2214	Dominant dystrophic epidermolysis bullosa, nails only	NA	158676	C9JBL3:Q02388	NP_000085.1
Core matrisome	Collagens	COL7A1	collagen, type VII, alpha 1	2214	Dominant dystrophic epidermolysis bullosa, nails only	Genatlas	158676	C9JBL3:Q02388	NP_000085.1
Core matrisome	Collagens	COL7A1	collagen, type VII, alpha 1	2214	Dominant dystrophic epidermolysis bullosa, nails only	HGNC	158676	C9JBL3:Q02388	NP_000085.1
Core matrisome	Collagens	COL7A1	collagen, type VII, alpha 1	2214	Dominant dystrophic epidermolysis bullosa, nails only	OMIM	158676	C9JBL3:Q02388	NP_000085.1
Core matrisome	Collagens	COL7A1	collagen, type VII, alpha 1	2214	Dominant dystrophic epidermolysis bullosa, nails only	Reactome	158676	C9JBL3:Q02388	NP_000085.1
Core matrisome	Collagens	COL7A1	collagen, type VII, alpha 1	2214	Dominant dystrophic epidermolysis bullosa, nails only	SwissProt	158676	C9JBL3:Q02388	NP_000085.1
Core matrisome	Collagens	COL7A1	collagen, type VII, alpha 1	2214	Dominant dystrophic epidermolysis bullosa, nails only	NA	158676	C9JBL3:Q02388	NP_000085.1
Core matrisome	Collagens	COL7A1	collagen, type VII, alpha 1	2214	Dystrophic epidermolysis bullosa pruriginosa	Ensembl	89843	C9JBL3:Q02388	NP_000085.1
Core matrisome	Collagens	COL7A1	collagen, type VII, alpha 1	2214	Dystrophic epidermolysis bullosa pruriginosa	NA	89843	C9JBL3:Q02388	NP_000085.1
Core matrisome	Collagens	COL7A1	collagen, type VII, alpha 1	2214	Dystrophic epidermolysis bullosa pruriginosa	NA	89843	C9JBL3:Q02388	NP_000085.1
Core matrisome	Collagens	COL7A1	collagen, type VII, alpha 1	2214	Dystrophic epidermolysis bullosa pruriginosa	Genatlas	89843	C9JBL3:Q02388	NP_000085.1
Core matrisome	Collagens	COL7A1	collagen, type VII, alpha 1	2214	Dystrophic epidermolysis bullosa pruriginosa	HGNC	89843	C9JBL3:Q02388	NP_000085.1
Core matrisome	Collagens	COL7A1	collagen, type VII, alpha 1	2214	Dystrophic epidermolysis bullosa pruriginosa	OMIM	89843	C9JBL3:Q02388	NP_000085.1
Core matrisome	Collagens	COL7A1	collagen, type VII, alpha 1	2214	Dystrophic epidermolysis bullosa pruriginosa	Reactome	89843	C9JBL3:Q02388	NP_000085.1
Core matrisome	Collagens	COL7A1	collagen, type VII, alpha 1	2214	Dystrophic epidermolysis bullosa pruriginosa	SwissProt	89843	C9JBL3:Q02388	NP_000085.1
Core matrisome	Collagens	COL7A1	collagen, type VII, alpha 1	2214	Dystrophic epidermolysis bullosa pruriginosa	NA	89843	C9JBL3:Q02388	NP_000085.1
Core matrisome	Collagens	COL7A1	collagen, type VII, alpha 1	2214	Epidermolysis bullosa simplex superficialis	Ensembl	89839	C9JBL3:Q02388	NP_000085.1
Core matrisome	Collagens	COL7A1	collagen, type VII, alpha 1	2214	Epidermolysis bullosa simplex superficialis	NA	89839	C9JBL3:Q02388	NP_000085.1
Core matrisome	Collagens	COL7A1	collagen, type VII, alpha 1	2214	Epidermolysis bullosa simplex superficialis	NA	89839	C9JBL3:Q02388	NP_000085.1
Core matrisome	Collagens	COL7A1	collagen, type VII, alpha 1	2214	Epidermolysis bullosa simplex superficialis	Genatlas	89839	C9JBL3:Q02388	NP_000085.1
Core matrisome	Collagens	COL7A1	collagen, type VII, alpha 1	2214	Epidermolysis bullosa simplex superficialis	HGNC	89839	C9JBL3:Q02388	NP_000085.1
Core matrisome	Collagens	COL7A1	collagen, type VII, alpha 1	2214	Epidermolysis bullosa simplex superficialis	OMIM	89839	C9JBL3:Q02388	NP_000085.1
Core matrisome	Collagens	COL7A1	collagen, type VII, alpha 1	2214	Epidermolysis bullosa simplex superficialis	Reactome	89839	C9JBL3:Q02388	NP_000085.1
Core matrisome	Collagens	COL7A1	collagen, type VII, alpha 1	2214	Epidermolysis bullosa simplex superficialis	SwissProt	89839	C9JBL3:Q02388	NP_000085.1
Core matrisome	Collagens	COL7A1	collagen, type VII, alpha 1	2214	Epidermolysis bullosa simplex superficialis	NA	89839	C9JBL3:Q02388	NP_000085.1
Core matrisome	Collagens	COL7A1	collagen, type VII, alpha 1	2214	Generalized dominant dystrophic epidermolysis bullosa	Ensembl	231568	C9JBL3:Q02388	NP_000085.1
Core matrisome	Collagens	COL7A1	collagen, type VII, alpha 1	2214	Generalized dominant dystrophic epidermolysis bullosa	NA	231568	C9JBL3:Q02388	NP_000085.1
Core matrisome	Collagens	COL7A1	collagen, type VII, alpha 1	2214	Generalized dominant dystrophic epidermolysis bullosa	NA	231568	C9JBL3:Q02388	NP_000085.1
Core matrisome	Collagens	COL7A1	collagen, type VII, alpha 1	2214	Generalized dominant dystrophic epidermolysis bullosa	Genatlas	231568	C9JBL3:Q02388	NP_000085.1
Core matrisome	Collagens	COL7A1	collagen, type VII, alpha 1	2214	Generalized dominant dystrophic epidermolysis bullosa	HGNC	231568	C9JBL3:Q02388	NP_000085.1
Core matrisome	Collagens	COL7A1	collagen, type VII, alpha 1	2214	Generalized dominant dystrophic epidermolysis bullosa	OMIM	231568	C9JBL3:Q02388	NP_000085.1
Core matrisome	Collagens	COL7A1	collagen, type VII, alpha 1	2214	Generalized dominant dystrophic epidermolysis bullosa	Reactome	231568	C9JBL3:Q02388	NP_000085.1
Core matrisome	Collagens	COL7A1	collagen, type VII, alpha 1	2214	Generalized dominant dystrophic epidermolysis bullosa	SwissProt	231568	C9JBL3:Q02388	NP_000085.1
Core matrisome	Collagens	COL7A1	collagen, type VII, alpha 1	2214	Generalized dominant dystrophic epidermolysis bullosa	NA	231568	C9JBL3:Q02388	NP_000085.1
Core matrisome	Collagens	COL7A1	collagen, type VII, alpha 1	2214	Pretibial dystrophic epidermolysis bullosa	Ensembl	79410	C9JBL3:Q02388	NP_000085.1
Core matrisome	Collagens	COL7A1	collagen, type VII, alpha 1	2214	Pretibial dystrophic epidermolysis bullosa	NA	79410	C9JBL3:Q02388	NP_000085.1
Core matrisome	Collagens	COL7A1	collagen, type VII, alpha 1	2214	Pretibial dystrophic epidermolysis bullosa	NA	79410	C9JBL3:Q02388	NP_000085.1
Core matrisome	Collagens	COL7A1	collagen, type VII, alpha 1	2214	Pretibial dystrophic epidermolysis bullosa	Genatlas	79410	C9JBL3:Q02388	NP_000085.1
Core matrisome	Collagens	COL7A1	collagen, type VII, alpha 1	2214	Pretibial dystrophic epidermolysis bullosa	HGNC	79410	C9JBL3:Q02388	NP_000085.1
Core matrisome	Collagens	COL7A1	collagen, type VII, alpha 1	2214	Pretibial dystrophic epidermolysis bullosa	OMIM	79410	C9JBL3:Q02388	NP_000085.1
Core matrisome	Collagens	COL7A1	collagen, type VII, alpha 1	2214	Pretibial dystrophic epidermolysis bullosa	Reactome	79410	C9JBL3:Q02388	NP_000085.1
Core matrisome	Collagens	COL7A1	collagen, type VII, alpha 1	2214	Pretibial dystrophic epidermolysis bullosa	SwissProt	79410	C9JBL3:Q02388	NP_000085.1
Core matrisome	Collagens	COL7A1	collagen, type VII, alpha 1	2214	Pretibial dystrophic epidermolysis bullosa	NA	79410	C9JBL3:Q02388	NP_000085.1
Core matrisome	Collagens	COL7A1	collagen, type VII, alpha 1	2214	Recessive dystrophic epidermolysis bullosa inversa	Ensembl	79409	C9JBL3:Q02388	NP_000085.1
Core matrisome	Collagens	COL7A1	collagen, type VII, alpha 1	2214	Recessive dystrophic epidermolysis bullosa inversa	NA	79409	C9JBL3:Q02388	NP_000085.1
Core matrisome	Collagens	COL7A1	collagen, type VII, alpha 1	2214	Recessive dystrophic epidermolysis bullosa inversa	NA	79409	C9JBL3:Q02388	NP_000085.1
Core matrisome	Collagens	COL7A1	collagen, type VII, alpha 1	2214	Recessive dystrophic epidermolysis bullosa inversa	Genatlas	79409	C9JBL3:Q02388	NP_000085.1
Core matrisome	Collagens	COL7A1	collagen, type VII, alpha 1	2214	Recessive dystrophic epidermolysis bullosa inversa	HGNC	79409	C9JBL3:Q02388	NP_000085.1
Core matrisome	Collagens	COL7A1	collagen, type VII, alpha 1	2214	Recessive dystrophic epidermolysis bullosa inversa	OMIM	79409	C9JBL3:Q02388	NP_000085.1
Core matrisome	Collagens	COL7A1	collagen, type VII, alpha 1	2214	Recessive dystrophic epidermolysis bullosa inversa	Reactome	79409	C9JBL3:Q02388	NP_000085.1
Core matrisome	Collagens	COL7A1	collagen, type VII, alpha 1	2214	Recessive dystrophic epidermolysis bullosa inversa	SwissProt	79409	C9JBL3:Q02388	NP_000085.1
Core matrisome	Collagens	COL7A1	collagen, type VII, alpha 1	2214	Recessive dystrophic epidermolysis bullosa inversa	NA	79409	C9JBL3:Q02388	NP_000085.1
Core matrisome	Collagens	COL7A1	collagen, type VII, alpha 1	2214	Recessive dystrophic epidermolysis bullosa, generalized intermediate	Ensembl	89842	C9JBL3:Q02388	NP_000085.1
Core matrisome	Collagens	COL7A1	collagen, type VII, alpha 1	2214	Recessive dystrophic epidermolysis bullosa, generalized intermediate	NA	89842	C9JBL3:Q02388	NP_000085.1
Core matrisome	Collagens	COL7A1	collagen, type VII, alpha 1	2214	Recessive dystrophic epidermolysis bullosa, generalized intermediate	NA	89842	C9JBL3:Q02388	NP_000085.1
Core matrisome	Collagens	COL7A1	collagen, type VII, alpha 1	2214	Recessive dystrophic epidermolysis bullosa, generalized intermediate	Genatlas	89842	C9JBL3:Q02388	NP_000085.1
Core matrisome	Collagens	COL7A1	collagen, type VII, alpha 1	2214	Recessive dystrophic epidermolysis bullosa, generalized intermediate	HGNC	89842	C9JBL3:Q02388	NP_000085.1
Core matrisome	Collagens	COL7A1	collagen, type VII, alpha 1	2214	Recessive dystrophic epidermolysis bullosa, generalized intermediate	OMIM	89842	C9JBL3:Q02388	NP_000085.1
Core matrisome	Collagens	COL7A1	collagen, type VII, alpha 1	2214	Recessive dystrophic epidermolysis bullosa, generalized intermediate	Reactome	89842	C9JBL3:Q02388	NP_000085.1
Core matrisome	Collagens	COL7A1	collagen, type VII, alpha 1	2214	Recessive dystrophic epidermolysis bullosa, generalized intermediate	SwissProt	89842	C9JBL3:Q02388	NP_000085.1
Core matrisome	Collagens	COL7A1	collagen, type VII, alpha 1	2214	Recessive dystrophic epidermolysis bullosa, generalized intermediate	NA	89842	C9JBL3:Q02388	NP_000085.1
Core matrisome	Collagens	COL7A1	collagen, type VII, alpha 1	2214	Severe generalized recessive dystrophic epidermolysis bullosa	Ensembl	79408	C9JBL3:Q02388	NP_000085.1
Core matrisome	Collagens	COL7A1	collagen, type VII, alpha 1	2214	Severe generalized recessive dystrophic epidermolysis bullosa	NA	79408	C9JBL3:Q02388	NP_000085.1
Core matrisome	Collagens	COL7A1	collagen, type VII, alpha 1	2214	Severe generalized recessive dystrophic epidermolysis bullosa	NA	79408	C9JBL3:Q02388	NP_000085.1
Core matrisome	Collagens	COL7A1	collagen, type VII, alpha 1	2214	Severe generalized recessive dystrophic epidermolysis bullosa	Genatlas	79408	C9JBL3:Q02388	NP_000085.1
Core matrisome	Collagens	COL7A1	collagen, type VII, alpha 1	2214	Severe generalized recessive dystrophic epidermolysis bullosa	HGNC	79408	C9JBL3:Q02388	NP_000085.1
Core matrisome	Collagens	COL7A1	collagen, type VII, alpha 1	2214	Severe generalized recessive dystrophic epidermolysis bullosa	OMIM	79408	C9JBL3:Q02388	NP_000085.1
Core matrisome	Collagens	COL7A1	collagen, type VII, alpha 1	2214	Severe generalized recessive dystrophic epidermolysis bullosa	Reactome	79408	C9JBL3:Q02388	NP_000085.1
Core matrisome	Collagens	COL7A1	collagen, type VII, alpha 1	2214	Severe generalized recessive dystrophic epidermolysis bullosa	SwissProt	79408	C9JBL3:Q02388	NP_000085.1
Core matrisome	Collagens	COL7A1	collagen, type VII, alpha 1	2214	Severe generalized recessive dystrophic epidermolysis bullosa	NA	79408	C9JBL3:Q02388	NP_000085.1
Core matrisome	Collagens	COL7A1	collagen, type VII, alpha 1	2214	Transient bullous dermolysis of the newborn	Ensembl	79411	C9JBL3:Q02388	NP_000085.1
Core matrisome	Collagens	COL7A1	collagen, type VII, alpha 1	2214	Transient bullous dermolysis of the newborn	NA	79411	C9JBL3:Q02388	NP_000085.1
Core matrisome	Collagens	COL7A1	collagen, type VII, alpha 1	2214	Transient bullous dermolysis of the newborn	NA	79411	C9JBL3:Q02388	NP_000085.1
Core matrisome	Collagens	COL7A1	collagen, type VII, alpha 1	2214	Transient bullous dermolysis of the newborn	Genatlas	79411	C9JBL3:Q02388	NP_000085.1
Core matrisome	Collagens	COL7A1	collagen, type VII, alpha 1	2214	Transient bullous dermolysis of the newborn	HGNC	79411	C9JBL3:Q02388	NP_000085.1
Core matrisome	Collagens	COL7A1	collagen, type VII, alpha 1	2214	Transient bullous dermolysis of the newborn	OMIM	79411	C9JBL3:Q02388	NP_000085.1
Core matrisome	Collagens	COL7A1	collagen, type VII, alpha 1	2214	Transient bullous dermolysis of the newborn	Reactome	79411	C9JBL3:Q02388	NP_000085.1
Core matrisome	Collagens	COL7A1	collagen, type VII, alpha 1	2214	Transient bullous dermolysis of the newborn	SwissProt	79411	C9JBL3:Q02388	NP_000085.1
Core matrisome	Collagens	COL7A1	collagen, type VII, alpha 1	2214	Transient bullous dermolysis of the newborn	NA	79411	C9JBL3:Q02388	NP_000085.1
Core matrisome	Collagens	COL8A2	collagen, type VIII, alpha 2	2216	Fuchs endothelial corneal dystrophy	Ensembl	98974	E9PP49:P25067	NP_005193.1:XP_005270535.1:XP_005270536.1
Core matrisome	Collagens	COL8A2	collagen, type VIII, alpha 2	2216	Fuchs endothelial corneal dystrophy	NA	98974	E9PP49:P25067	NP_005193.1:XP_005270535.1:XP_005270536.1
Core matrisome	Collagens	COL8A2	collagen, type VIII, alpha 2	2216	Fuchs endothelial corneal dystrophy	NA	98974	E9PP49:P25067	NP_005193.1:XP_005270535.1:XP_005270536.1
Core matrisome	Collagens	COL8A2	collagen, type VIII, alpha 2	2216	Fuchs endothelial corneal dystrophy	NA	98974	E9PP49:P25067	NP_005193.1:XP_005270535.1:XP_005270536.1
Core matrisome	Collagens	COL8A2	collagen, type VIII, alpha 2	2216	Fuchs endothelial corneal dystrophy	Genatlas	98974	E9PP49:P25067	NP_005193.1:XP_005270535.1:XP_005270536.1
Core matrisome	Collagens	COL8A2	collagen, type VIII, alpha 2	2216	Fuchs endothelial corneal dystrophy	HGNC	98974	E9PP49:P25067	NP_005193.1:XP_005270535.1:XP_005270536.1
Core matrisome	Collagens	COL8A2	collagen, type VIII, alpha 2	2216	Fuchs endothelial corneal dystrophy	OMIM	98974	E9PP49:P25067	NP_005193.1:XP_005270535.1:XP_005270536.1
Core matrisome	Collagens	COL8A2	collagen, type VIII, alpha 2	2216	Fuchs endothelial corneal dystrophy	Reactome	98974	E9PP49:P25067	NP_005193.1:XP_005270535.1:XP_005270536.1
Core matrisome	Collagens	COL8A2	collagen, type VIII, alpha 2	2216	Fuchs endothelial corneal dystrophy	SwissProt	98974	E9PP49:P25067	NP_005193.1:XP_005270535.1:XP_005270536.1
Core matrisome	Collagens	COL8A2	collagen, type VIII, alpha 2	2216	Fuchs endothelial corneal dystrophy	NA	98974	E9PP49:P25067	NP_005193.1:XP_005270535.1:XP_005270536.1
Core matrisome	Collagens	COL8A2	collagen, type VIII, alpha 2	2216	Posterior polymorphous corneal dystrophy	Ensembl	98973	E9PP49:P25067	NP_005193.1:XP_005270535.1:XP_005270536.1
Core matrisome	Collagens	COL8A2	collagen, type VIII, alpha 2	2216	Posterior polymorphous corneal dystrophy	NA	98973	E9PP49:P25067	NP_005193.1:XP_005270535.1:XP_005270536.1
Core matrisome	Collagens	COL8A2	collagen, type VIII, alpha 2	2216	Posterior polymorphous corneal dystrophy	NA	98973	E9PP49:P25067	NP_005193.1:XP_005270535.1:XP_005270536.1
Core matrisome	Collagens	COL8A2	collagen, type VIII, alpha 2	2216	Posterior polymorphous corneal dystrophy	NA	98973	E9PP49:P25067	NP_005193.1:XP_005270535.1:XP_005270536.1
Core matrisome	Collagens	COL8A2	collagen, type VIII, alpha 2	2216	Posterior polymorphous corneal dystrophy	Genatlas	98973	E9PP49:P25067	NP_005193.1:XP_005270535.1:XP_005270536.1
Core matrisome	Collagens	COL8A2	collagen, type VIII, alpha 2	2216	Posterior polymorphous corneal dystrophy	HGNC	98973	E9PP49:P25067	NP_005193.1:XP_005270535.1:XP_005270536.1
Core matrisome	Collagens	COL8A2	collagen, type VIII, alpha 2	2216	Posterior polymorphous corneal dystrophy	OMIM	98973	E9PP49:P25067	NP_005193.1:XP_005270535.1:XP_005270536.1
Core matrisome	Collagens	COL8A2	collagen, type VIII, alpha 2	2216	Posterior polymorphous corneal dystrophy	Reactome	98973	E9PP49:P25067	NP_005193.1:XP_005270535.1:XP_005270536.1
Core matrisome	Collagens	COL8A2	collagen, type VIII, alpha 2	2216	Posterior polymorphous corneal dystrophy	SwissProt	98973	E9PP49:P25067	NP_005193.1:XP_005270535.1:XP_005270536.1
Core matrisome	Collagens	COL8A2	collagen, type VIII, alpha 2	2216	Posterior polymorphous corneal dystrophy	NA	98973	E9PP49:P25067	NP_005193.1:XP_005270535.1:XP_005270536.1
Core matrisome	Collagens	COL9A1	collagen, type IX, alpha 1	2217	Autosomal recessive Stickler syndrome	NA	250984	A6NEQ6:P20849	NP_001842.3:NP_511040.2
Core matrisome	Collagens	COL9A1	collagen, type IX, alpha 1	2217	Autosomal recessive Stickler syndrome	Genatlas	250984	A6NEQ6:P20849	NP_001842.3:NP_511040.2
Core matrisome	Collagens	COL9A1	collagen, type IX, alpha 1	2217	Autosomal recessive Stickler syndrome	HGNC	250984	A6NEQ6:P20849	NP_001842.3:NP_511040.2
Core matrisome	Collagens	COL9A1	collagen, type IX, alpha 1	2217	Autosomal recessive Stickler syndrome	OMIM	250984	A6NEQ6:P20849	NP_001842.3:NP_511040.2
Core matrisome	Collagens	COL9A1	collagen, type IX, alpha 1	2217	Autosomal recessive Stickler syndrome	Reactome	250984	A6NEQ6:P20849	NP_001842.3:NP_511040.2
Core matrisome	Collagens	COL9A1	collagen, type IX, alpha 1	2217	Autosomal recessive Stickler syndrome	SwissProt	250984	A6NEQ6:P20849	NP_001842.3:NP_511040.2
Core matrisome	Collagens	COL9A1	collagen, type IX, alpha 1	2217	Autosomal recessive Stickler syndrome	NA	250984	A6NEQ6:P20849	NP_001842.3:NP_511040.2
Core matrisome	Collagens	COL9A1	collagen, type IX, alpha 1	2217	Autosomal recessive Stickler syndrome	Ensembl	250984	A6NEQ6:P20849	NP_001842.3:NP_511040.2
Core matrisome	Collagens	COL9A1	collagen, type IX, alpha 1	2217	Multiple epiphyseal dysplasia due to collagen 9 anomaly	Ensembl	166002	A6NEQ6:P20849	NP_001842.3:NP_511040.2
Core matrisome	Collagens	COL9A1	collagen, type IX, alpha 1	2217	Multiple epiphyseal dysplasia due to collagen 9 anomaly	NA	166002	A6NEQ6:P20849	NP_001842.3:NP_511040.2
Core matrisome	Collagens	COL9A1	collagen, type IX, alpha 1	2217	Multiple epiphyseal dysplasia due to collagen 9 anomaly	Genatlas	166002	A6NEQ6:P20849	NP_001842.3:NP_511040.2
Core matrisome	Collagens	COL9A1	collagen, type IX, alpha 1	2217	Multiple epiphyseal dysplasia due to collagen 9 anomaly	HGNC	166002	A6NEQ6:P20849	NP_001842.3:NP_511040.2
Core matrisome	Collagens	COL9A1	collagen, type IX, alpha 1	2217	Multiple epiphyseal dysplasia due to collagen 9 anomaly	OMIM	166002	A6NEQ6:P20849	NP_001842.3:NP_511040.2
Core matrisome	Collagens	COL9A1	collagen, type IX, alpha 1	2217	Multiple epiphyseal dysplasia due to collagen 9 anomaly	Reactome	166002	A6NEQ6:P20849	NP_001842.3:NP_511040.2
Core matrisome	Collagens	COL9A1	collagen, type IX, alpha 1	2217	Multiple epiphyseal dysplasia due to collagen 9 anomaly	SwissProt	166002	A6NEQ6:P20849	NP_001842.3:NP_511040.2
Core matrisome	Collagens	COL9A1	collagen, type IX, alpha 1	2217	Multiple epiphyseal dysplasia due to collagen 9 anomaly	NA	166002	A6NEQ6:P20849	NP_001842.3:NP_511040.2
Core matrisome	Collagens	COL9A2	collagen, type IX, alpha 2	2218	Autosomal recessive Stickler syndrome	NA	250984	B1AKJ1:B1AKJ3:H0Y409:Q14055	NP_001843.1:XP_006710428.1
Core matrisome	Collagens	COL9A2	collagen, type IX, alpha 2	2218	Autosomal recessive Stickler syndrome	Genatlas	250984	B1AKJ1:B1AKJ3:H0Y409:Q14055	NP_001843.1:XP_006710428.1
Core matrisome	Collagens	COL9A2	collagen, type IX, alpha 2	2218	Autosomal recessive Stickler syndrome	HGNC	250984	B1AKJ1:B1AKJ3:H0Y409:Q14055	NP_001843.1:XP_006710428.1
Core matrisome	Collagens	COL9A2	collagen, type IX, alpha 2	2218	Autosomal recessive Stickler syndrome	OMIM	250984	B1AKJ1:B1AKJ3:H0Y409:Q14055	NP_001843.1:XP_006710428.1
Core matrisome	Collagens	COL9A2	collagen, type IX, alpha 2	2218	Autosomal recessive Stickler syndrome	Reactome	250984	B1AKJ1:B1AKJ3:H0Y409:Q14055	NP_001843.1:XP_006710428.1
Core matrisome	Collagens	COL9A2	collagen, type IX, alpha 2	2218	Autosomal recessive Stickler syndrome	SwissProt	250984	B1AKJ1:B1AKJ3:H0Y409:Q14055	NP_001843.1:XP_006710428.1
Core matrisome	Collagens	COL9A2	collagen, type IX, alpha 2	2218	Autosomal recessive Stickler syndrome	NA	250984	B1AKJ1:B1AKJ3:H0Y409:Q14055	NP_001843.1:XP_006710428.1
Core matrisome	Collagens	COL9A2	collagen, type IX, alpha 2	2218	Autosomal recessive Stickler syndrome	Ensembl	250984	B1AKJ1:B1AKJ3:H0Y409:Q14055	NP_001843.1:XP_006710428.1
Core matrisome	Collagens	COL9A2	collagen, type IX, alpha 2	2218	Multiple epiphyseal dysplasia due to collagen 9 anomaly	Ensembl	166002	B1AKJ1:B1AKJ3:H0Y409:Q14055	NP_001843.1:XP_006710428.1
Core matrisome	Collagens	COL9A2	collagen, type IX, alpha 2	2218	Multiple epiphyseal dysplasia due to collagen 9 anomaly	NA	166002	B1AKJ1:B1AKJ3:H0Y409:Q14055	NP_001843.1:XP_006710428.1
Core matrisome	Collagens	COL9A2	collagen, type IX, alpha 2	2218	Multiple epiphyseal dysplasia due to collagen 9 anomaly	Genatlas	166002	B1AKJ1:B1AKJ3:H0Y409:Q14055	NP_001843.1:XP_006710428.1
Core matrisome	Collagens	COL9A2	collagen, type IX, alpha 2	2218	Multiple epiphyseal dysplasia due to collagen 9 anomaly	HGNC	166002	B1AKJ1:B1AKJ3:H0Y409:Q14055	NP_001843.1:XP_006710428.1
Core matrisome	Collagens	COL9A2	collagen, type IX, alpha 2	2218	Multiple epiphyseal dysplasia due to collagen 9 anomaly	OMIM	166002	B1AKJ1:B1AKJ3:H0Y409:Q14055	NP_001843.1:XP_006710428.1
Core matrisome	Collagens	COL9A2	collagen, type IX, alpha 2	2218	Multiple epiphyseal dysplasia due to collagen 9 anomaly	Reactome	166002	B1AKJ1:B1AKJ3:H0Y409:Q14055	NP_001843.1:XP_006710428.1
Core matrisome	Collagens	COL9A2	collagen, type IX, alpha 2	2218	Multiple epiphyseal dysplasia due to collagen 9 anomaly	SwissProt	166002	B1AKJ1:B1AKJ3:H0Y409:Q14055	NP_001843.1:XP_006710428.1
Core matrisome	Collagens	COL9A2	collagen, type IX, alpha 2	2218	Multiple epiphyseal dysplasia due to collagen 9 anomaly	NA	166002	B1AKJ1:B1AKJ3:H0Y409:Q14055	NP_001843.1:XP_006710428.1
Core matrisome	Collagens	COL9A3	collagen, type IX, alpha 3	2219	Autosomal recessive Stickler syndrome	NA	250984	Q14050:Q4VXW1	NP_001844.3
Core matrisome	Collagens	COL9A3	collagen, type IX, alpha 3	2219	Autosomal recessive Stickler syndrome	NA	250984	Q14050:Q4VXW1	NP_001844.3
Core matrisome	Collagens	COL9A3	collagen, type IX, alpha 3	2219	Autosomal recessive Stickler syndrome	NA	250984	Q14050:Q4VXW1	NP_001844.3
Core matrisome	Collagens	COL9A3	collagen, type IX, alpha 3	2219	Autosomal recessive Stickler syndrome	NA	250984	Q14050:Q4VXW1	NP_001844.3
Core matrisome	Collagens	COL9A3	collagen, type IX, alpha 3	2219	Autosomal recessive Stickler syndrome	NA	250984	Q14050:Q4VXW1	NP_001844.3
Core matrisome	Collagens	COL9A3	collagen, type IX, alpha 3	2219	Autosomal recessive Stickler syndrome	NA	250984	Q14050:Q4VXW1	NP_001844.3
Core matrisome	Collagens	COL9A3	collagen, type IX, alpha 3	2219	Autosomal recessive Stickler syndrome	Genatlas	250984	Q14050:Q4VXW1	NP_001844.3
Core matrisome	Collagens	COL9A3	collagen, type IX, alpha 3	2219	Autosomal recessive Stickler syndrome	HGNC	250984	Q14050:Q4VXW1	NP_001844.3
Core matrisome	Collagens	COL9A3	collagen, type IX, alpha 3	2219	Autosomal recessive Stickler syndrome	OMIM	250984	Q14050:Q4VXW1	NP_001844.3
Core matrisome	Collagens	COL9A3	collagen, type IX, alpha 3	2219	Autosomal recessive Stickler syndrome	Reactome	250984	Q14050:Q4VXW1	NP_001844.3
Core matrisome	Collagens	COL9A3	collagen, type IX, alpha 3	2219	Autosomal recessive Stickler syndrome	SwissProt	250984	Q14050:Q4VXW1	NP_001844.3
Core matrisome	Collagens	COL9A3	collagen, type IX, alpha 3	2219	Autosomal recessive Stickler syndrome	NA	250984	Q14050:Q4VXW1	NP_001844.3
Core matrisome	Collagens	COL9A3	collagen, type IX, alpha 3	2219	Autosomal recessive Stickler syndrome	Ensembl	250984	Q14050:Q4VXW1	NP_001844.3
Core matrisome	Collagens	COL9A3	collagen, type IX, alpha 3	2219	Multiple epiphyseal dysplasia due to collagen 9 anomaly	Ensembl	166002	Q14050:Q4VXW1	NP_001844.3
Core matrisome	Collagens	COL9A3	collagen, type IX, alpha 3	2219	Multiple epiphyseal dysplasia due to collagen 9 anomaly	NA	166002	Q14050:Q4VXW1	NP_001844.3
Core matrisome	Collagens	COL9A3	collagen, type IX, alpha 3	2219	Multiple epiphyseal dysplasia due to collagen 9 anomaly	NA	166002	Q14050:Q4VXW1	NP_001844.3
Core matrisome	Collagens	COL9A3	collagen, type IX, alpha 3	2219	Multiple epiphyseal dysplasia due to collagen 9 anomaly	NA	166002	Q14050:Q4VXW1	NP_001844.3
Core matrisome	Collagens	COL9A3	collagen, type IX, alpha 3	2219	Multiple epiphyseal dysplasia due to collagen 9 anomaly	NA	166002	Q14050:Q4VXW1	NP_001844.3
Core matrisome	Collagens	COL9A3	collagen, type IX, alpha 3	2219	Multiple epiphyseal dysplasia due to collagen 9 anomaly	NA	166002	Q14050:Q4VXW1	NP_001844.3
Core matrisome	Collagens	COL9A3	collagen, type IX, alpha 3	2219	Multiple epiphyseal dysplasia due to collagen 9 anomaly	NA	166002	Q14050:Q4VXW1	NP_001844.3
Core matrisome	Collagens	COL9A3	collagen, type IX, alpha 3	2219	Multiple epiphyseal dysplasia due to collagen 9 anomaly	Genatlas	166002	Q14050:Q4VXW1	NP_001844.3
Core matrisome	Collagens	COL9A3	collagen, type IX, alpha 3	2219	Multiple epiphyseal dysplasia due to collagen 9 anomaly	HGNC	166002	Q14050:Q4VXW1	NP_001844.3
Core matrisome	Collagens	COL9A3	collagen, type IX, alpha 3	2219	Multiple epiphyseal dysplasia due to collagen 9 anomaly	OMIM	166002	Q14050:Q4VXW1	NP_001844.3
Core matrisome	Collagens	COL9A3	collagen, type IX, alpha 3	2219	Multiple epiphyseal dysplasia due to collagen 9 anomaly	Reactome	166002	Q14050:Q4VXW1	NP_001844.3
Core matrisome	Collagens	COL9A3	collagen, type IX, alpha 3	2219	Multiple epiphyseal dysplasia due to collagen 9 anomaly	SwissProt	166002	Q14050:Q4VXW1	NP_001844.3
Core matrisome	Collagens	COL9A3	collagen, type IX, alpha 3	2219	Multiple epiphyseal dysplasia due to collagen 9 anomaly	NA	166002	Q14050:Q4VXW1	NP_001844.3
Core matrisome	ECM Glycoproteins	AGRN	agrin	329	Postsynaptic congenital myasthenic syndromes	Ensembl	98913	H0Y5U1:O00468	NP_940978.2:XP_005244806.1:XP_006710696.1
Core matrisome	ECM Glycoproteins	AGRN	agrin	329	Postsynaptic congenital myasthenic syndromes	NA	98913	H0Y5U1:O00468	NP_940978.2:XP_005244806.1:XP_006710696.1
Core matrisome	ECM Glycoproteins	AGRN	agrin	329	Postsynaptic congenital myasthenic syndromes	Genatlas	98913	H0Y5U1:O00468	NP_940978.2:XP_005244806.1:XP_006710696.1
Core matrisome	ECM Glycoproteins	AGRN	agrin	329	Postsynaptic congenital myasthenic syndromes	HGNC	98913	H0Y5U1:O00468	NP_940978.2:XP_005244806.1:XP_006710696.1
Core matrisome	ECM Glycoproteins	AGRN	agrin	329	Postsynaptic congenital myasthenic syndromes	OMIM	98913	H0Y5U1:O00468	NP_940978.2:XP_005244806.1:XP_006710696.1
Core matrisome	ECM Glycoproteins	AGRN	agrin	329	Postsynaptic congenital myasthenic syndromes	Reactome	98913	H0Y5U1:O00468	NP_940978.2:XP_005244806.1:XP_006710696.1
Core matrisome	ECM Glycoproteins	AGRN	agrin	329	Postsynaptic congenital myasthenic syndromes	SwissProt	98913	H0Y5U1:O00468	NP_940978.2:XP_005244806.1:XP_006710696.1
Core matrisome	ECM Glycoproteins	AGRN	agrin	329	Postsynaptic congenital myasthenic syndromes	NA	98913	H0Y5U1:O00468	NP_940978.2:XP_005244806.1:XP_006710696.1
Core matrisome	ECM Glycoproteins	AGRN	agrin	329	Presynaptic congenital myasthenic syndromes	Ensembl	98914	H0Y5U1:O00468	NP_940978.2:XP_005244806.1:XP_006710696.1
Core matrisome	ECM Glycoproteins	AGRN	agrin	329	Presynaptic congenital myasthenic syndromes	NA	98914	H0Y5U1:O00468	NP_940978.2:XP_005244806.1:XP_006710696.1
Core matrisome	ECM Glycoproteins	AGRN	agrin	329	Presynaptic congenital myasthenic syndromes	Genatlas	98914	H0Y5U1:O00468	NP_940978.2:XP_005244806.1:XP_006710696.1
Core matrisome	ECM Glycoproteins	AGRN	agrin	329	Presynaptic congenital myasthenic syndromes	HGNC	98914	H0Y5U1:O00468	NP_940978.2:XP_005244806.1:XP_006710696.1
Core matrisome	ECM Glycoproteins	AGRN	agrin	329	Presynaptic congenital myasthenic syndromes	OMIM	98914	H0Y5U1:O00468	NP_940978.2:XP_005244806.1:XP_006710696.1
Core matrisome	ECM Glycoproteins	AGRN	agrin	329	Presynaptic congenital myasthenic syndromes	Reactome	98914	H0Y5U1:O00468	NP_940978.2:XP_005244806.1:XP_006710696.1
Core matrisome	ECM Glycoproteins	AGRN	agrin	329	Presynaptic congenital myasthenic syndromes	SwissProt	98914	H0Y5U1:O00468	NP_940978.2:XP_005244806.1:XP_006710696.1
Core matrisome	ECM Glycoproteins	AGRN	agrin	329	Presynaptic congenital myasthenic syndromes	NA	98914	H0Y5U1:O00468	NP_940978.2:XP_005244806.1:XP_006710696.1
Core matrisome	ECM Glycoproteins	AMBN	ameloblastin (enamel matrix protein)	452	Hypoplastic amelogenesis imperfecta	NA	100031	Q9NP70	NP_057603.1
Core matrisome	ECM Glycoproteins	AMBN	ameloblastin (enamel matrix protein)	452	Hypoplastic amelogenesis imperfecta	Reactome	100031	Q9NP70	NP_057603.1
Core matrisome	ECM Glycoproteins	AMBN	ameloblastin (enamel matrix protein)	452	Hypoplastic amelogenesis imperfecta	Genatlas	100031	Q9NP70	NP_057603.1
Core matrisome	ECM Glycoproteins	AMBN	ameloblastin (enamel matrix protein)	452	Hypoplastic amelogenesis imperfecta	HGNC	100031	Q9NP70	NP_057603.1
Core matrisome	ECM Glycoproteins	AMBN	ameloblastin (enamel matrix protein)	452	Hypoplastic amelogenesis imperfecta	OMIM	100031	Q9NP70	NP_057603.1
Core matrisome	ECM Glycoproteins	AMBN	ameloblastin (enamel matrix protein)	452	Hypoplastic amelogenesis imperfecta	SwissProt	100031	Q9NP70	NP_057603.1
Core matrisome	ECM Glycoproteins	AMBN	ameloblastin (enamel matrix protein)	452	Hypoplastic amelogenesis imperfecta	NA	100031	Q9NP70	NP_057603.1
Core matrisome	ECM Glycoproteins	AMBN	ameloblastin (enamel matrix protein)	452	Hypoplastic amelogenesis imperfecta	Ensembl	100031	Q9NP70	NP_057603.1
Core matrisome	ECM Glycoproteins	AMELX	amelogenin (amelogenesis imperfecta 1, X-linked)	461	Hypomaturation amelogenesis imperfecta	Ensembl	100033	Q99217	NP_001133.1:NP_872621.1:NP_872622.1
Core matrisome	ECM Glycoproteins	AMELX	amelogenin (amelogenesis imperfecta 1, X-linked)	461	Hypomaturation amelogenesis imperfecta	NA	100033	Q99217	NP_001133.1:NP_872621.1:NP_872622.1
Core matrisome	ECM Glycoproteins	AMELX	amelogenin (amelogenesis imperfecta 1, X-linked)	461	Hypomaturation amelogenesis imperfecta	Genatlas	100033	Q99217	NP_001133.1:NP_872621.1:NP_872622.1
Core matrisome	ECM Glycoproteins	AMELX	amelogenin (amelogenesis imperfecta 1, X-linked)	461	Hypomaturation amelogenesis imperfecta	HGNC	100033	Q99217	NP_001133.1:NP_872621.1:NP_872622.1
Core matrisome	ECM Glycoproteins	AMELX	amelogenin (amelogenesis imperfecta 1, X-linked)	461	Hypomaturation amelogenesis imperfecta	OMIM	100033	Q99217	NP_001133.1:NP_872621.1:NP_872622.1
Core matrisome	ECM Glycoproteins	AMELX	amelogenin (amelogenesis imperfecta 1, X-linked)	461	Hypomaturation amelogenesis imperfecta	SwissProt	100033	Q99217	NP_001133.1:NP_872621.1:NP_872622.1
Core matrisome	ECM Glycoproteins	AMELX	amelogenin (amelogenesis imperfecta 1, X-linked)	461	Hypomaturation amelogenesis imperfecta	Reactome	100033	Q99217	NP_001133.1:NP_872621.1:NP_872622.1
Core matrisome	ECM Glycoproteins	AMELX	amelogenin (amelogenesis imperfecta 1, X-linked)	461	Hypomaturation amelogenesis imperfecta	NA	100033	Q99217	NP_001133.1:NP_872621.1:NP_872622.1
Core matrisome	ECM Glycoproteins	BMPER	BMP binding endothelial regulator	24154	Diaphanospondylodysostosis	NA	66637	C9JY72:F8WDG9:G5E9K4:Q8N8U9	NP_597725.1
Core matrisome	ECM Glycoproteins	BMPER	BMP binding endothelial regulator	24154	Diaphanospondylodysostosis	NA	66637	C9JY72:F8WDG9:G5E9K4:Q8N8U9	NP_597725.1
Core matrisome	ECM Glycoproteins	BMPER	BMP binding endothelial regulator	24154	Diaphanospondylodysostosis	NA	66637	C9JY72:F8WDG9:G5E9K4:Q8N8U9	NP_597725.1
Core matrisome	ECM Glycoproteins	BMPER	BMP binding endothelial regulator	24154	Diaphanospondylodysostosis	Genatlas	66637	C9JY72:F8WDG9:G5E9K4:Q8N8U9	NP_597725.1
Core matrisome	ECM Glycoproteins	BMPER	BMP binding endothelial regulator	24154	Diaphanospondylodysostosis	HGNC	66637	C9JY72:F8WDG9:G5E9K4:Q8N8U9	NP_597725.1
Core matrisome	ECM Glycoproteins	BMPER	BMP binding endothelial regulator	24154	Diaphanospondylodysostosis	OMIM	66637	C9JY72:F8WDG9:G5E9K4:Q8N8U9	NP_597725.1
Core matrisome	ECM Glycoproteins	BMPER	BMP binding endothelial regulator	24154	Diaphanospondylodysostosis	SwissProt	66637	C9JY72:F8WDG9:G5E9K4:Q8N8U9	NP_597725.1
Core matrisome	ECM Glycoproteins	BMPER	BMP binding endothelial regulator	24154	Diaphanospondylodysostosis	NA	66637	C9JY72:F8WDG9:G5E9K4:Q8N8U9	NP_597725.1
Core matrisome	ECM Glycoproteins	BMPER	BMP binding endothelial regulator	24154	Diaphanospondylodysostosis	Ensembl	66637	C9JY72:F8WDG9:G5E9K4:Q8N8U9	NP_597725.1
Core matrisome	ECM Glycoproteins	BMPER	BMP binding endothelial regulator	24154	Ischiovertebral syndrome	NA	85200	C9JY72:F8WDG9:G5E9K4:Q8N8U9	NP_597725.1
Core matrisome	ECM Glycoproteins	BMPER	BMP binding endothelial regulator	24154	Ischiovertebral syndrome	NA	85200	C9JY72:F8WDG9:G5E9K4:Q8N8U9	NP_597725.1
Core matrisome	ECM Glycoproteins	BMPER	BMP binding endothelial regulator	24154	Ischiovertebral syndrome	NA	85200	C9JY72:F8WDG9:G5E9K4:Q8N8U9	NP_597725.1
Core matrisome	ECM Glycoproteins	BMPER	BMP binding endothelial regulator	24154	Ischiovertebral syndrome	Genatlas	85200	C9JY72:F8WDG9:G5E9K4:Q8N8U9	NP_597725.1
Core matrisome	ECM Glycoproteins	BMPER	BMP binding endothelial regulator	24154	Ischiovertebral syndrome	HGNC	85200	C9JY72:F8WDG9:G5E9K4:Q8N8U9	NP_597725.1
Core matrisome	ECM Glycoproteins	BMPER	BMP binding endothelial regulator	24154	Ischiovertebral syndrome	OMIM	85200	C9JY72:F8WDG9:G5E9K4:Q8N8U9	NP_597725.1
Core matrisome	ECM Glycoproteins	BMPER	BMP binding endothelial regulator	24154	Ischiovertebral syndrome	SwissProt	85200	C9JY72:F8WDG9:G5E9K4:Q8N8U9	NP_597725.1
Core matrisome	ECM Glycoproteins	BMPER	BMP binding endothelial regulator	24154	Ischiovertebral syndrome	NA	85200	C9JY72:F8WDG9:G5E9K4:Q8N8U9	NP_597725.1
Core matrisome	ECM Glycoproteins	BMPER	BMP binding endothelial regulator	24154	Ischiovertebral syndrome	Ensembl	85200	C9JY72:F8WDG9:G5E9K4:Q8N8U9	NP_597725.1
Core matrisome	ECM Glycoproteins	COCH	coagulation factor C homolog, cochlin (Limulus polyphemus)	2180	Autosomal dominant non-syndromic sensorineural deafness type DFNA	NA	90635	E7EN67:G3V4C4:G3V5G6:G3V5V4:G3V5X3:H0YJJ0:H0YJW4:O43405:Q96IU6	NP_001128530.1:NP_004077.1:XP_006720136.1
Core matrisome	ECM Glycoproteins	COCH	coagulation factor C homolog, cochlin (Limulus polyphemus)	2180	Autosomal dominant non-syndromic sensorineural deafness type DFNA	Genatlas	90635	E7EN67:G3V4C4:G3V5G6:G3V5V4:G3V5X3:H0YJJ0:H0YJW4:O43405:Q96IU6	NP_001128530.1:NP_004077.1:XP_006720136.1
Core matrisome	ECM Glycoproteins	COCH	coagulation factor C homolog, cochlin (Limulus polyphemus)	2180	Autosomal dominant non-syndromic sensorineural deafness type DFNA	HGNC	90635	E7EN67:G3V4C4:G3V5G6:G3V5V4:G3V5X3:H0YJJ0:H0YJW4:O43405:Q96IU6	NP_001128530.1:NP_004077.1:XP_006720136.1
Core matrisome	ECM Glycoproteins	COCH	coagulation factor C homolog, cochlin (Limulus polyphemus)	2180	Autosomal dominant non-syndromic sensorineural deafness type DFNA	OMIM	90635	E7EN67:G3V4C4:G3V5G6:G3V5V4:G3V5X3:H0YJJ0:H0YJW4:O43405:Q96IU6	NP_001128530.1:NP_004077.1:XP_006720136.1
Core matrisome	ECM Glycoproteins	COCH	coagulation factor C homolog, cochlin (Limulus polyphemus)	2180	Autosomal dominant non-syndromic sensorineural deafness type DFNA	SwissProt	90635	E7EN67:G3V4C4:G3V5G6:G3V5V4:G3V5X3:H0YJJ0:H0YJW4:O43405:Q96IU6	NP_001128530.1:NP_004077.1:XP_006720136.1
Core matrisome	ECM Glycoproteins	COCH	coagulation factor C homolog, cochlin (Limulus polyphemus)	2180	Autosomal dominant non-syndromic sensorineural deafness type DFNA	NA	90635	E7EN67:G3V4C4:G3V5G6:G3V5V4:G3V5X3:H0YJJ0:H0YJW4:O43405:Q96IU6	NP_001128530.1:NP_004077.1:XP_006720136.1
Core matrisome	ECM Glycoproteins	COCH	coagulation factor C homolog, cochlin (Limulus polyphemus)	2180	Autosomal dominant non-syndromic sensorineural deafness type DFNA	Ensembl	90635	E7EN67:G3V4C4:G3V5G6:G3V5V4:G3V5X3:H0YJJ0:H0YJW4:O43405:Q96IU6	NP_001128530.1:NP_004077.1:XP_006720136.1
Core matrisome	ECM Glycoproteins	COLQ	collagen-like tail subunit (single strand of homotrimer) of asymmetric acetylcholinesterase	2226	Synaptic congenital myasthenic syndromes	Ensembl	98915	C9JBB2:F8WA67:Q9Y215:S4R408	NP_005668.2:NP_536799.1:NP_536800.2
Core matrisome	ECM Glycoproteins	COLQ	collagen-like tail subunit (single strand of homotrimer) of asymmetric acetylcholinesterase	2226	Synaptic congenital myasthenic syndromes	NA	98915	C9JBB2:F8WA67:Q9Y215:S4R408	NP_005668.2:NP_536799.1:NP_536800.2
Core matrisome	ECM Glycoproteins	COLQ	collagen-like tail subunit (single strand of homotrimer) of asymmetric acetylcholinesterase	2226	Synaptic congenital myasthenic syndromes	NA	98915	C9JBB2:F8WA67:Q9Y215:S4R408	NP_005668.2:NP_536799.1:NP_536800.2
Core matrisome	ECM Glycoproteins	COLQ	collagen-like tail subunit (single strand of homotrimer) of asymmetric acetylcholinesterase	2226	Synaptic congenital myasthenic syndromes	NA	98915	C9JBB2:F8WA67:Q9Y215:S4R408	NP_005668.2:NP_536799.1:NP_536800.2
Core matrisome	ECM Glycoproteins	COLQ	collagen-like tail subunit (single strand of homotrimer) of asymmetric acetylcholinesterase	2226	Synaptic congenital myasthenic syndromes	NA	98915	C9JBB2:F8WA67:Q9Y215:S4R408	NP_005668.2:NP_536799.1:NP_536800.2
Core matrisome	ECM Glycoproteins	COLQ	collagen-like tail subunit (single strand of homotrimer) of asymmetric acetylcholinesterase	2226	Synaptic congenital myasthenic syndromes	NA	98915	C9JBB2:F8WA67:Q9Y215:S4R408	NP_005668.2:NP_536799.1:NP_536800.2
Core matrisome	ECM Glycoproteins	COLQ	collagen-like tail subunit (single strand of homotrimer) of asymmetric acetylcholinesterase	2226	Synaptic congenital myasthenic syndromes	Genatlas	98915	C9JBB2:F8WA67:Q9Y215:S4R408	NP_005668.2:NP_536799.1:NP_536800.2
Core matrisome	ECM Glycoproteins	COLQ	collagen-like tail subunit (single strand of homotrimer) of asymmetric acetylcholinesterase	2226	Synaptic congenital myasthenic syndromes	HGNC	98915	C9JBB2:F8WA67:Q9Y215:S4R408	NP_005668.2:NP_536799.1:NP_536800.2
Core matrisome	ECM Glycoproteins	COLQ	collagen-like tail subunit (single strand of homotrimer) of asymmetric acetylcholinesterase	2226	Synaptic congenital myasthenic syndromes	OMIM	98915	C9JBB2:F8WA67:Q9Y215:S4R408	NP_005668.2:NP_536799.1:NP_536800.2
Core matrisome	ECM Glycoproteins	COLQ	collagen-like tail subunit (single strand of homotrimer) of asymmetric acetylcholinesterase	2226	Synaptic congenital myasthenic syndromes	SwissProt	98915	C9JBB2:F8WA67:Q9Y215:S4R408	NP_005668.2:NP_536799.1:NP_536800.2
Core matrisome	ECM Glycoproteins	COLQ	collagen-like tail subunit (single strand of homotrimer) of asymmetric acetylcholinesterase	2226	Synaptic congenital myasthenic syndromes	NA	98915	C9JBB2:F8WA67:Q9Y215:S4R408	NP_005668.2:NP_536799.1:NP_536800.2
Core matrisome	ECM Glycoproteins	COMP	cartilage oligomeric matrix protein	2227	Multiple epiphyseal dysplasia type 1	Ensembl	93308	B4DKJ3:G3XAP6:P49747	NP_000086.2
Core matrisome	ECM Glycoproteins	COMP	cartilage oligomeric matrix protein	2227	Multiple epiphyseal dysplasia type 1	NA	93308	B4DKJ3:G3XAP6:P49747	NP_000086.2
Core matrisome	ECM Glycoproteins	COMP	cartilage oligomeric matrix protein	2227	Multiple epiphyseal dysplasia type 1	NA	93308	B4DKJ3:G3XAP6:P49747	NP_000086.2
Core matrisome	ECM Glycoproteins	COMP	cartilage oligomeric matrix protein	2227	Multiple epiphyseal dysplasia type 1	NA	93308	B4DKJ3:G3XAP6:P49747	NP_000086.2
Core matrisome	ECM Glycoproteins	COMP	cartilage oligomeric matrix protein	2227	Multiple epiphyseal dysplasia type 1	Genatlas	93308	B4DKJ3:G3XAP6:P49747	NP_000086.2
Core matrisome	ECM Glycoproteins	COMP	cartilage oligomeric matrix protein	2227	Multiple epiphyseal dysplasia type 1	HGNC	93308	B4DKJ3:G3XAP6:P49747	NP_000086.2
Core matrisome	ECM Glycoproteins	COMP	cartilage oligomeric matrix protein	2227	Multiple epiphyseal dysplasia type 1	OMIM	93308	B4DKJ3:G3XAP6:P49747	NP_000086.2
Core matrisome	ECM Glycoproteins	COMP	cartilage oligomeric matrix protein	2227	Multiple epiphyseal dysplasia type 1	Reactome	93308	B4DKJ3:G3XAP6:P49747	NP_000086.2
Core matrisome	ECM Glycoproteins	COMP	cartilage oligomeric matrix protein	2227	Multiple epiphyseal dysplasia type 1	SwissProt	93308	B4DKJ3:G3XAP6:P49747	NP_000086.2
Core matrisome	ECM Glycoproteins	COMP	cartilage oligomeric matrix protein	2227	Multiple epiphyseal dysplasia type 1	NA	93308	B4DKJ3:G3XAP6:P49747	NP_000086.2
Core matrisome	ECM Glycoproteins	COMP	cartilage oligomeric matrix protein	2227	Pseudoachondroplasia	Ensembl	750	B4DKJ3:G3XAP6:P49747	NP_000086.2
Core matrisome	ECM Glycoproteins	COMP	cartilage oligomeric matrix protein	2227	Pseudoachondroplasia	NA	750	B4DKJ3:G3XAP6:P49747	NP_000086.2
Core matrisome	ECM Glycoproteins	COMP	cartilage oligomeric matrix protein	2227	Pseudoachondroplasia	NA	750	B4DKJ3:G3XAP6:P49747	NP_000086.2
Core matrisome	ECM Glycoproteins	COMP	cartilage oligomeric matrix protein	2227	Pseudoachondroplasia	NA	750	B4DKJ3:G3XAP6:P49747	NP_000086.2
Core matrisome	ECM Glycoproteins	COMP	cartilage oligomeric matrix protein	2227	Pseudoachondroplasia	Genatlas	750	B4DKJ3:G3XAP6:P49747	NP_000086.2
Core matrisome	ECM Glycoproteins	COMP	cartilage oligomeric matrix protein	2227	Pseudoachondroplasia	HGNC	750	B4DKJ3:G3XAP6:P49747	NP_000086.2
Core matrisome	ECM Glycoproteins	COMP	cartilage oligomeric matrix protein	2227	Pseudoachondroplasia	OMIM	750	B4DKJ3:G3XAP6:P49747	NP_000086.2
Core matrisome	ECM Glycoproteins	COMP	cartilage oligomeric matrix protein	2227	Pseudoachondroplasia	Reactome	750	B4DKJ3:G3XAP6:P49747	NP_000086.2
Core matrisome	ECM Glycoproteins	COMP	cartilage oligomeric matrix protein	2227	Pseudoachondroplasia	SwissProt	750	B4DKJ3:G3XAP6:P49747	NP_000086.2
Core matrisome	ECM Glycoproteins	COMP	cartilage oligomeric matrix protein	2227	Pseudoachondroplasia	NA	750	B4DKJ3:G3XAP6:P49747	NP_000086.2
Core matrisome	ECM Glycoproteins	CRELD1	cysteine-rich with EGF-like domains 1	14630	Complete atrioventricular canal-left heart obstruction syndrome	Ensembl	99066	F8WBY3:H7C2L3:Q96HD1	NP_001026887.1:NP_001070883.1:NP_056328.2:XP_006713391.1
Core matrisome	ECM Glycoproteins	CRELD1	cysteine-rich with EGF-like domains 1	14630	Complete atrioventricular canal-left heart obstruction syndrome	NA	99066	F8WBY3:H7C2L3:Q96HD1	NP_001026887.1:NP_001070883.1:NP_056328.2:XP_006713391.1
Core matrisome	ECM Glycoproteins	CRELD1	cysteine-rich with EGF-like domains 1	14630	Complete atrioventricular canal-left heart obstruction syndrome	Genatlas	99066	F8WBY3:H7C2L3:Q96HD1	NP_001026887.1:NP_001070883.1:NP_056328.2:XP_006713391.1
Core matrisome	ECM Glycoproteins	CRELD1	cysteine-rich with EGF-like domains 1	14630	Complete atrioventricular canal-left heart obstruction syndrome	HGNC	99066	F8WBY3:H7C2L3:Q96HD1	NP_001026887.1:NP_001070883.1:NP_056328.2:XP_006713391.1
Core matrisome	ECM Glycoproteins	CRELD1	cysteine-rich with EGF-like domains 1	14630	Complete atrioventricular canal-left heart obstruction syndrome	OMIM	99066	F8WBY3:H7C2L3:Q96HD1	NP_001026887.1:NP_001070883.1:NP_056328.2:XP_006713391.1
Core matrisome	ECM Glycoproteins	CRELD1	cysteine-rich with EGF-like domains 1	14630	Complete atrioventricular canal-left heart obstruction syndrome	SwissProt	99066	F8WBY3:H7C2L3:Q96HD1	NP_001026887.1:NP_001070883.1:NP_056328.2:XP_006713391.1
Core matrisome	ECM Glycoproteins	CRELD1	cysteine-rich with EGF-like domains 1	14630	Complete atrioventricular canal-left heart obstruction syndrome	NA	99066	F8WBY3:H7C2L3:Q96HD1	NP_001026887.1:NP_001070883.1:NP_056328.2:XP_006713391.1
Core matrisome	ECM Glycoproteins	CRELD1	cysteine-rich with EGF-like domains 1	14630	Complete atrioventricular canal-tetralogy of Fallot syndrome	Ensembl	99068	F8WBY3:H7C2L3:Q96HD1	NP_001026887.1:NP_001070883.1:NP_056328.2:XP_006713391.1
Core matrisome	ECM Glycoproteins	CRELD1	cysteine-rich with EGF-like domains 1	14630	Complete atrioventricular canal-tetralogy of Fallot syndrome	NA	99068	F8WBY3:H7C2L3:Q96HD1	NP_001026887.1:NP_001070883.1:NP_056328.2:XP_006713391.1
Core matrisome	ECM Glycoproteins	CRELD1	cysteine-rich with EGF-like domains 1	14630	Complete atrioventricular canal-tetralogy of Fallot syndrome	Genatlas	99068	F8WBY3:H7C2L3:Q96HD1	NP_001026887.1:NP_001070883.1:NP_056328.2:XP_006713391.1
Core matrisome	ECM Glycoproteins	CRELD1	cysteine-rich with EGF-like domains 1	14630	Complete atrioventricular canal-tetralogy of Fallot syndrome	HGNC	99068	F8WBY3:H7C2L3:Q96HD1	NP_001026887.1:NP_001070883.1:NP_056328.2:XP_006713391.1
Core matrisome	ECM Glycoproteins	CRELD1	cysteine-rich with EGF-like domains 1	14630	Complete atrioventricular canal-tetralogy of Fallot syndrome	OMIM	99068	F8WBY3:H7C2L3:Q96HD1	NP_001026887.1:NP_001070883.1:NP_056328.2:XP_006713391.1
Core matrisome	ECM Glycoproteins	CRELD1	cysteine-rich with EGF-like domains 1	14630	Complete atrioventricular canal-tetralogy of Fallot syndrome	SwissProt	99068	F8WBY3:H7C2L3:Q96HD1	NP_001026887.1:NP_001070883.1:NP_056328.2:XP_006713391.1
Core matrisome	ECM Glycoproteins	CRELD1	cysteine-rich with EGF-like domains 1	14630	Complete atrioventricular canal-tetralogy of Fallot syndrome	NA	99068	F8WBY3:H7C2L3:Q96HD1	NP_001026887.1:NP_001070883.1:NP_056328.2:XP_006713391.1
Core matrisome	ECM Glycoproteins	CRELD1	cysteine-rich with EGF-like domains 1	14630	Complete atrioventricular canal-ventricle hypoplasia syndrome	Ensembl	99067	F8WBY3:H7C2L3:Q96HD1	NP_001026887.1:NP_001070883.1:NP_056328.2:XP_006713391.1
Core matrisome	ECM Glycoproteins	CRELD1	cysteine-rich with EGF-like domains 1	14630	Complete atrioventricular canal-ventricle hypoplasia syndrome	NA	99067	F8WBY3:H7C2L3:Q96HD1	NP_001026887.1:NP_001070883.1:NP_056328.2:XP_006713391.1
Core matrisome	ECM Glycoproteins	CRELD1	cysteine-rich with EGF-like domains 1	14630	Complete atrioventricular canal-ventricle hypoplasia syndrome	Genatlas	99067	F8WBY3:H7C2L3:Q96HD1	NP_001026887.1:NP_001070883.1:NP_056328.2:XP_006713391.1
Core matrisome	ECM Glycoproteins	CRELD1	cysteine-rich with EGF-like domains 1	14630	Complete atrioventricular canal-ventricle hypoplasia syndrome	HGNC	99067	F8WBY3:H7C2L3:Q96HD1	NP_001026887.1:NP_001070883.1:NP_056328.2:XP_006713391.1
Core matrisome	ECM Glycoproteins	CRELD1	cysteine-rich with EGF-like domains 1	14630	Complete atrioventricular canal-ventricle hypoplasia syndrome	OMIM	99067	F8WBY3:H7C2L3:Q96HD1	NP_001026887.1:NP_001070883.1:NP_056328.2:XP_006713391.1
Core matrisome	ECM Glycoproteins	CRELD1	cysteine-rich with EGF-like domains 1	14630	Complete atrioventricular canal-ventricle hypoplasia syndrome	SwissProt	99067	F8WBY3:H7C2L3:Q96HD1	NP_001026887.1:NP_001070883.1:NP_056328.2:XP_006713391.1
Core matrisome	ECM Glycoproteins	CRELD1	cysteine-rich with EGF-like domains 1	14630	Complete atrioventricular canal-ventricle hypoplasia syndrome	NA	99067	F8WBY3:H7C2L3:Q96HD1	NP_001026887.1:NP_001070883.1:NP_056328.2:XP_006713391.1
Core matrisome	ECM Glycoproteins	CRELD1	cysteine-rich with EGF-like domains 1	14630	Partial atrioventricular canal	Ensembl	1330	F8WBY3:H7C2L3:Q96HD1	NP_001026887.1:NP_001070883.1:NP_056328.2:XP_006713391.1
Core matrisome	ECM Glycoproteins	CRELD1	cysteine-rich with EGF-like domains 1	14630	Partial atrioventricular canal	NA	1330	F8WBY3:H7C2L3:Q96HD1	NP_001026887.1:NP_001070883.1:NP_056328.2:XP_006713391.1
Core matrisome	ECM Glycoproteins	CRELD1	cysteine-rich with EGF-like domains 1	14630	Partial atrioventricular canal	Genatlas	1330	F8WBY3:H7C2L3:Q96HD1	NP_001026887.1:NP_001070883.1:NP_056328.2:XP_006713391.1
Core matrisome	ECM Glycoproteins	CRELD1	cysteine-rich with EGF-like domains 1	14630	Partial atrioventricular canal	HGNC	1330	F8WBY3:H7C2L3:Q96HD1	NP_001026887.1:NP_001070883.1:NP_056328.2:XP_006713391.1
Core matrisome	ECM Glycoproteins	CRELD1	cysteine-rich with EGF-like domains 1	14630	Partial atrioventricular canal	OMIM	1330	F8WBY3:H7C2L3:Q96HD1	NP_001026887.1:NP_001070883.1:NP_056328.2:XP_006713391.1
Core matrisome	ECM Glycoproteins	CRELD1	cysteine-rich with EGF-like domains 1	14630	Partial atrioventricular canal	SwissProt	1330	F8WBY3:H7C2L3:Q96HD1	NP_001026887.1:NP_001070883.1:NP_056328.2:XP_006713391.1
Core matrisome	ECM Glycoproteins	CRELD1	cysteine-rich with EGF-like domains 1	14630	Partial atrioventricular canal	NA	1330	F8WBY3:H7C2L3:Q96HD1	NP_001026887.1:NP_001070883.1:NP_056328.2:XP_006713391.1
Core matrisome	ECM Glycoproteins	CRIM1	cysteine rich transmembrane BMP regulator 1 (chordin-like)	2359	Colobomatous macrophthalmia-microcornea syndrome	NA	468672	H7C1Z0:H7C2T6:H7C458:Q9NZV1	NP_057525.1
Core matrisome	ECM Glycoproteins	CRIM1	cysteine rich transmembrane BMP regulator 1 (chordin-like)	2359	Colobomatous macrophthalmia-microcornea syndrome	Genatlas	468672	H7C1Z0:H7C2T6:H7C458:Q9NZV1	NP_057525.1
Core matrisome	ECM Glycoproteins	CRIM1	cysteine rich transmembrane BMP regulator 1 (chordin-like)	2359	Colobomatous macrophthalmia-microcornea syndrome	SwissProt	468672	H7C1Z0:H7C2T6:H7C458:Q9NZV1	NP_057525.1
Core matrisome	ECM Glycoproteins	CRIM1	cysteine rich transmembrane BMP regulator 1 (chordin-like)	2359	Colobomatous macrophthalmia-microcornea syndrome	HGNC	468672	H7C1Z0:H7C2T6:H7C458:Q9NZV1	NP_057525.1
Core matrisome	ECM Glycoproteins	CRIM1	cysteine rich transmembrane BMP regulator 1 (chordin-like)	2359	Colobomatous macrophthalmia-microcornea syndrome	OMIM	468672	H7C1Z0:H7C2T6:H7C458:Q9NZV1	NP_057525.1
Core matrisome	ECM Glycoproteins	CRIM1	cysteine rich transmembrane BMP regulator 1 (chordin-like)	2359	Colobomatous macrophthalmia-microcornea syndrome	NA	468672	H7C1Z0:H7C2T6:H7C458:Q9NZV1	NP_057525.1
Core matrisome	ECM Glycoproteins	CRIM1	cysteine rich transmembrane BMP regulator 1 (chordin-like)	2359	Colobomatous macrophthalmia-microcornea syndrome	Ensembl	468672	H7C1Z0:H7C2T6:H7C458:Q9NZV1	NP_057525.1
Core matrisome	ECM Glycoproteins	CTGF	connective tissue growth factor	2500	Diffuse cutaneous systemic sclerosis	NA	220393	P29279	NP_001892.1
Core matrisome	ECM Glycoproteins	CTGF	connective tissue growth factor	2500	Diffuse cutaneous systemic sclerosis	NA	220393	P29279	NP_001892.1
Core matrisome	ECM Glycoproteins	CTGF	connective tissue growth factor	2500	Diffuse cutaneous systemic sclerosis	Genatlas	220393	P29279	NP_001892.1
Core matrisome	ECM Glycoproteins	CTGF	connective tissue growth factor	2500	Diffuse cutaneous systemic sclerosis	HGNC	220393	P29279	NP_001892.1
Core matrisome	ECM Glycoproteins	CTGF	connective tissue growth factor	2500	Diffuse cutaneous systemic sclerosis	OMIM	220393	P29279	NP_001892.1
Core matrisome	ECM Glycoproteins	CTGF	connective tissue growth factor	2500	Diffuse cutaneous systemic sclerosis	Reactome	220393	P29279	NP_001892.1
Core matrisome	ECM Glycoproteins	CTGF	connective tissue growth factor	2500	Diffuse cutaneous systemic sclerosis	SwissProt	220393	P29279	NP_001892.1
Core matrisome	ECM Glycoproteins	CTGF	connective tissue growth factor	2500	Diffuse cutaneous systemic sclerosis	NA	220393	P29279	NP_001892.1
Core matrisome	ECM Glycoproteins	CTGF	connective tissue growth factor	2500	Diffuse cutaneous systemic sclerosis	Ensembl	220393	P29279	NP_001892.1
Core matrisome	ECM Glycoproteins	CTGF	connective tissue growth factor	2500	Limited cutaneous systemic sclerosis	Ensembl	220402	P29279	NP_001892.1
Core matrisome	ECM Glycoproteins	CTGF	connective tissue growth factor	2500	Limited cutaneous systemic sclerosis	NA	220402	P29279	NP_001892.1
Core matrisome	ECM Glycoproteins	CTGF	connective tissue growth factor	2500	Limited cutaneous systemic sclerosis	NA	220402	P29279	NP_001892.1
Core matrisome	ECM Glycoproteins	CTGF	connective tissue growth factor	2500	Limited cutaneous systemic sclerosis	Genatlas	220402	P29279	NP_001892.1
Core matrisome	ECM Glycoproteins	CTGF	connective tissue growth factor	2500	Limited cutaneous systemic sclerosis	HGNC	220402	P29279	NP_001892.1
Core matrisome	ECM Glycoproteins	CTGF	connective tissue growth factor	2500	Limited cutaneous systemic sclerosis	OMIM	220402	P29279	NP_001892.1
Core matrisome	ECM Glycoproteins	CTGF	connective tissue growth factor	2500	Limited cutaneous systemic sclerosis	Reactome	220402	P29279	NP_001892.1
Core matrisome	ECM Glycoproteins	CTGF	connective tissue growth factor	2500	Limited cutaneous systemic sclerosis	SwissProt	220402	P29279	NP_001892.1
Core matrisome	ECM Glycoproteins	CTGF	connective tissue growth factor	2500	Limited cutaneous systemic sclerosis	NA	220402	P29279	NP_001892.1
Core matrisome	ECM Glycoproteins	DMP1	dentin matrix acidic phosphoprotein 1	2932	Autosomal recessive hypophosphatemic rickets	NA	289176	Q13316	NP_001073380.1:NP_004398.1
Core matrisome	ECM Glycoproteins	DMP1	dentin matrix acidic phosphoprotein 1	2932	Autosomal recessive hypophosphatemic rickets	Genatlas	289176	Q13316	NP_001073380.1:NP_004398.1
Core matrisome	ECM Glycoproteins	DMP1	dentin matrix acidic phosphoprotein 1	2932	Autosomal recessive hypophosphatemic rickets	HGNC	289176	Q13316	NP_001073380.1:NP_004398.1
Core matrisome	ECM Glycoproteins	DMP1	dentin matrix acidic phosphoprotein 1	2932	Autosomal recessive hypophosphatemic rickets	OMIM	289176	Q13316	NP_001073380.1:NP_004398.1
Core matrisome	ECM Glycoproteins	DMP1	dentin matrix acidic phosphoprotein 1	2932	Autosomal recessive hypophosphatemic rickets	Reactome	289176	Q13316	NP_001073380.1:NP_004398.1
Core matrisome	ECM Glycoproteins	DMP1	dentin matrix acidic phosphoprotein 1	2932	Autosomal recessive hypophosphatemic rickets	SwissProt	289176	Q13316	NP_001073380.1:NP_004398.1
Core matrisome	ECM Glycoproteins	DMP1	dentin matrix acidic phosphoprotein 1	2932	Autosomal recessive hypophosphatemic rickets	NA	289176	Q13316	NP_001073380.1:NP_004398.1
Core matrisome	ECM Glycoproteins	DMP1	dentin matrix acidic phosphoprotein 1	2932	Autosomal recessive hypophosphatemic rickets	Ensembl	289176	Q13316	NP_001073380.1:NP_004398.1
Core matrisome	ECM Glycoproteins	DSPP	dentin sialophosphoprotein	3054	Dentin dysplasia type I	Ensembl	99789	Q9NZW4	NP_055023.2
Core matrisome	ECM Glycoproteins	DSPP	dentin sialophosphoprotein	3054	Dentin dysplasia type I	NA	99789	Q9NZW4	NP_055023.2
Core matrisome	ECM Glycoproteins	DSPP	dentin sialophosphoprotein	3054	Dentin dysplasia type I	HGNC	99789	Q9NZW4	NP_055023.2
Core matrisome	ECM Glycoproteins	DSPP	dentin sialophosphoprotein	3054	Dentin dysplasia type I	OMIM	99789	Q9NZW4	NP_055023.2
Core matrisome	ECM Glycoproteins	DSPP	dentin sialophosphoprotein	3054	Dentin dysplasia type I	Reactome	99789	Q9NZW4	NP_055023.2
Core matrisome	ECM Glycoproteins	DSPP	dentin sialophosphoprotein	3054	Dentin dysplasia type I	SwissProt	99789	Q9NZW4	NP_055023.2
Core matrisome	ECM Glycoproteins	DSPP	dentin sialophosphoprotein	3054	Dentin dysplasia type I	Genatlas	99789	Q9NZW4	NP_055023.2
Core matrisome	ECM Glycoproteins	DSPP	dentin sialophosphoprotein	3054	Dentin dysplasia type I	NA	99789	Q9NZW4	NP_055023.2
Core matrisome	ECM Glycoproteins	DSPP	dentin sialophosphoprotein	3054	Dentin dysplasia type II	Ensembl	99791	Q9NZW4	NP_055023.2
Core matrisome	ECM Glycoproteins	DSPP	dentin sialophosphoprotein	3054	Dentin dysplasia type II	NA	99791	Q9NZW4	NP_055023.2
Core matrisome	ECM Glycoproteins	DSPP	dentin sialophosphoprotein	3054	Dentin dysplasia type II	HGNC	99791	Q9NZW4	NP_055023.2
Core matrisome	ECM Glycoproteins	DSPP	dentin sialophosphoprotein	3054	Dentin dysplasia type II	OMIM	99791	Q9NZW4	NP_055023.2
Core matrisome	ECM Glycoproteins	DSPP	dentin sialophosphoprotein	3054	Dentin dysplasia type II	Reactome	99791	Q9NZW4	NP_055023.2
Core matrisome	ECM Glycoproteins	DSPP	dentin sialophosphoprotein	3054	Dentin dysplasia type II	SwissProt	99791	Q9NZW4	NP_055023.2
Core matrisome	ECM Glycoproteins	DSPP	dentin sialophosphoprotein	3054	Dentin dysplasia type II	Genatlas	99791	Q9NZW4	NP_055023.2
Core matrisome	ECM Glycoproteins	DSPP	dentin sialophosphoprotein	3054	Dentin dysplasia type II	NA	99791	Q9NZW4	NP_055023.2
Core matrisome	ECM Glycoproteins	DSPP	dentin sialophosphoprotein	3054	Dentinogenesis imperfecta type 2	Ensembl	166260	Q9NZW4	NP_055023.2
Core matrisome	ECM Glycoproteins	DSPP	dentin sialophosphoprotein	3054	Dentinogenesis imperfecta type 2	NA	166260	Q9NZW4	NP_055023.2
Core matrisome	ECM Glycoproteins	DSPP	dentin sialophosphoprotein	3054	Dentinogenesis imperfecta type 2	HGNC	166260	Q9NZW4	NP_055023.2
Core matrisome	ECM Glycoproteins	DSPP	dentin sialophosphoprotein	3054	Dentinogenesis imperfecta type 2	OMIM	166260	Q9NZW4	NP_055023.2
Core matrisome	ECM Glycoproteins	DSPP	dentin sialophosphoprotein	3054	Dentinogenesis imperfecta type 2	Reactome	166260	Q9NZW4	NP_055023.2
Core matrisome	ECM Glycoproteins	DSPP	dentin sialophosphoprotein	3054	Dentinogenesis imperfecta type 2	SwissProt	166260	Q9NZW4	NP_055023.2
Core matrisome	ECM Glycoproteins	DSPP	dentin sialophosphoprotein	3054	Dentinogenesis imperfecta type 2	Genatlas	166260	Q9NZW4	NP_055023.2
Core matrisome	ECM Glycoproteins	DSPP	dentin sialophosphoprotein	3054	Dentinogenesis imperfecta type 2	NA	166260	Q9NZW4	NP_055023.2
Core matrisome	ECM Glycoproteins	DSPP	dentin sialophosphoprotein	3054	Dentinogenesis imperfecta type 3	Ensembl	166265	Q9NZW4	NP_055023.2
Core matrisome	ECM Glycoproteins	DSPP	dentin sialophosphoprotein	3054	Dentinogenesis imperfecta type 3	NA	166265	Q9NZW4	NP_055023.2
Core matrisome	ECM Glycoproteins	DSPP	dentin sialophosphoprotein	3054	Dentinogenesis imperfecta type 3	HGNC	166265	Q9NZW4	NP_055023.2
Core matrisome	ECM Glycoproteins	DSPP	dentin sialophosphoprotein	3054	Dentinogenesis imperfecta type 3	OMIM	166265	Q9NZW4	NP_055023.2
Core matrisome	ECM Glycoproteins	DSPP	dentin sialophosphoprotein	3054	Dentinogenesis imperfecta type 3	Reactome	166265	Q9NZW4	NP_055023.2
Core matrisome	ECM Glycoproteins	DSPP	dentin sialophosphoprotein	3054	Dentinogenesis imperfecta type 3	SwissProt	166265	Q9NZW4	NP_055023.2
Core matrisome	ECM Glycoproteins	DSPP	dentin sialophosphoprotein	3054	Dentinogenesis imperfecta type 3	Genatlas	166265	Q9NZW4	NP_055023.2
Core matrisome	ECM Glycoproteins	DSPP	dentin sialophosphoprotein	3054	Dentinogenesis imperfecta type 3	NA	166265	Q9NZW4	NP_055023.2
Core matrisome	ECM Glycoproteins	ECM1	extracellular matrix protein 1	3153	Lipoid proteinosis	Ensembl	530	Q16610	NP_001189787.1:NP_004416.2:NP_073155.2
Core matrisome	ECM Glycoproteins	ECM1	extracellular matrix protein 1	3153	Lipoid proteinosis	NA	530	Q16610	NP_001189787.1:NP_004416.2:NP_073155.2
Core matrisome	ECM Glycoproteins	ECM1	extracellular matrix protein 1	3153	Lipoid proteinosis	Genatlas	530	Q16610	NP_001189787.1:NP_004416.2:NP_073155.2
Core matrisome	ECM Glycoproteins	ECM1	extracellular matrix protein 1	3153	Lipoid proteinosis	HGNC	530	Q16610	NP_001189787.1:NP_004416.2:NP_073155.2
Core matrisome	ECM Glycoproteins	ECM1	extracellular matrix protein 1	3153	Lipoid proteinosis	OMIM	530	Q16610	NP_001189787.1:NP_004416.2:NP_073155.2
Core matrisome	ECM Glycoproteins	ECM1	extracellular matrix protein 1	3153	Lipoid proteinosis	SwissProt	530	Q16610	NP_001189787.1:NP_004416.2:NP_073155.2
Core matrisome	ECM Glycoproteins	ECM1	extracellular matrix protein 1	3153	Lipoid proteinosis	Reactome	530	Q16610	NP_001189787.1:NP_004416.2:NP_073155.2
Core matrisome	ECM Glycoproteins	ECM1	extracellular matrix protein 1	3153	Lipoid proteinosis	NA	530	Q16610	NP_001189787.1:NP_004416.2:NP_073155.2
Core matrisome	ECM Glycoproteins	EFEMP1	EGF-containing fibulin-like extracellular matrix protein 1	3218	Familial drusen	Ensembl	75376	C9J4H7:C9J4J8:C9J8S9:C9JPZ9:C9JQX7:C9JUM4:Q12805:Q580Q6	NP_001034437.1:NP_001034438.1
Core matrisome	ECM Glycoproteins	EFEMP1	EGF-containing fibulin-like extracellular matrix protein 1	3218	Familial drusen	NA	75376	C9J4H7:C9J4J8:C9J8S9:C9JPZ9:C9JQX7:C9JUM4:Q12805:Q580Q6	NP_001034437.1:NP_001034438.1
Core matrisome	ECM Glycoproteins	EFEMP1	EGF-containing fibulin-like extracellular matrix protein 1	3218	Familial drusen	NA	75376	C9J4H7:C9J4J8:C9J8S9:C9JPZ9:C9JQX7:C9JUM4:Q12805:Q580Q6	NP_001034437.1:NP_001034438.1
Core matrisome	ECM Glycoproteins	EFEMP1	EGF-containing fibulin-like extracellular matrix protein 1	3218	Familial drusen	NA	75376	C9J4H7:C9J4J8:C9J8S9:C9JPZ9:C9JQX7:C9JUM4:Q12805:Q580Q6	NP_001034437.1:NP_001034438.1
Core matrisome	ECM Glycoproteins	EFEMP1	EGF-containing fibulin-like extracellular matrix protein 1	3218	Familial drusen	NA	75376	C9J4H7:C9J4J8:C9J8S9:C9JPZ9:C9JQX7:C9JUM4:Q12805:Q580Q6	NP_001034437.1:NP_001034438.1
Core matrisome	ECM Glycoproteins	EFEMP1	EGF-containing fibulin-like extracellular matrix protein 1	3218	Familial drusen	Genatlas	75376	C9J4H7:C9J4J8:C9J8S9:C9JPZ9:C9JQX7:C9JUM4:Q12805:Q580Q6	NP_001034437.1:NP_001034438.1
Core matrisome	ECM Glycoproteins	EFEMP1	EGF-containing fibulin-like extracellular matrix protein 1	3218	Familial drusen	HGNC	75376	C9J4H7:C9J4J8:C9J8S9:C9JPZ9:C9JQX7:C9JUM4:Q12805:Q580Q6	NP_001034437.1:NP_001034438.1
Core matrisome	ECM Glycoproteins	EFEMP1	EGF-containing fibulin-like extracellular matrix protein 1	3218	Familial drusen	OMIM	75376	C9J4H7:C9J4J8:C9J8S9:C9JPZ9:C9JQX7:C9JUM4:Q12805:Q580Q6	NP_001034437.1:NP_001034438.1
Core matrisome	ECM Glycoproteins	EFEMP1	EGF-containing fibulin-like extracellular matrix protein 1	3218	Familial drusen	Reactome	75376	C9J4H7:C9J4J8:C9J8S9:C9JPZ9:C9JQX7:C9JUM4:Q12805:Q580Q6	NP_001034437.1:NP_001034438.1
Core matrisome	ECM Glycoproteins	EFEMP1	EGF-containing fibulin-like extracellular matrix protein 1	3218	Familial drusen	SwissProt	75376	C9J4H7:C9J4J8:C9J8S9:C9JPZ9:C9JQX7:C9JUM4:Q12805:Q580Q6	NP_001034437.1:NP_001034438.1
Core matrisome	ECM Glycoproteins	EFEMP1	EGF-containing fibulin-like extracellular matrix protein 1	3218	Familial drusen	NA	75376	C9J4H7:C9J4J8:C9J8S9:C9JPZ9:C9JQX7:C9JUM4:Q12805:Q580Q6	NP_001034437.1:NP_001034438.1
Core matrisome	ECM Glycoproteins	EFEMP2	EGF-containing fibulin-like extracellular matrix protein 2	3219	Autosomal recessive cutis laxa type 1	NA	90349	E9PI47:E9PKA3:E9PNB8:E9PRQ8:E9PRU1:E9PSC1:H0YCB5:H0YCR9:H0YET5:H0YEU0:O95967	NP_058634.4
Core matrisome	ECM Glycoproteins	EFEMP2	EGF-containing fibulin-like extracellular matrix protein 2	3219	Autosomal recessive cutis laxa type 1	NA	90349	E9PI47:E9PKA3:E9PNB8:E9PRQ8:E9PRU1:E9PSC1:H0YCB5:H0YCR9:H0YET5:H0YEU0:O95967	NP_058634.4
Core matrisome	ECM Glycoproteins	EFEMP2	EGF-containing fibulin-like extracellular matrix protein 2	3219	Autosomal recessive cutis laxa type 1	NA	90349	E9PI47:E9PKA3:E9PNB8:E9PRQ8:E9PRU1:E9PSC1:H0YCB5:H0YCR9:H0YET5:H0YEU0:O95967	NP_058634.4
Core matrisome	ECM Glycoproteins	EFEMP2	EGF-containing fibulin-like extracellular matrix protein 2	3219	Autosomal recessive cutis laxa type 1	Genatlas	90349	E9PI47:E9PKA3:E9PNB8:E9PRQ8:E9PRU1:E9PSC1:H0YCB5:H0YCR9:H0YET5:H0YEU0:O95967	NP_058634.4
Core matrisome	ECM Glycoproteins	EFEMP2	EGF-containing fibulin-like extracellular matrix protein 2	3219	Autosomal recessive cutis laxa type 1	HGNC	90349	E9PI47:E9PKA3:E9PNB8:E9PRQ8:E9PRU1:E9PSC1:H0YCB5:H0YCR9:H0YET5:H0YEU0:O95967	NP_058634.4
Core matrisome	ECM Glycoproteins	EFEMP2	EGF-containing fibulin-like extracellular matrix protein 2	3219	Autosomal recessive cutis laxa type 1	OMIM	90349	E9PI47:E9PKA3:E9PNB8:E9PRQ8:E9PRU1:E9PSC1:H0YCB5:H0YCR9:H0YET5:H0YEU0:O95967	NP_058634.4
Core matrisome	ECM Glycoproteins	EFEMP2	EGF-containing fibulin-like extracellular matrix protein 2	3219	Autosomal recessive cutis laxa type 1	Reactome	90349	E9PI47:E9PKA3:E9PNB8:E9PRQ8:E9PRU1:E9PSC1:H0YCB5:H0YCR9:H0YET5:H0YEU0:O95967	NP_058634.4
Core matrisome	ECM Glycoproteins	EFEMP2	EGF-containing fibulin-like extracellular matrix protein 2	3219	Autosomal recessive cutis laxa type 1	SwissProt	90349	E9PI47:E9PKA3:E9PNB8:E9PRQ8:E9PRU1:E9PSC1:H0YCB5:H0YCR9:H0YET5:H0YEU0:O95967	NP_058634.4
Core matrisome	ECM Glycoproteins	EFEMP2	EGF-containing fibulin-like extracellular matrix protein 2	3219	Autosomal recessive cutis laxa type 1	NA	90349	E9PI47:E9PKA3:E9PNB8:E9PRQ8:E9PRU1:E9PSC1:H0YCB5:H0YCR9:H0YET5:H0YEU0:O95967	NP_058634.4
Core matrisome	ECM Glycoproteins	EFEMP2	EGF-containing fibulin-like extracellular matrix protein 2	3219	Autosomal recessive cutis laxa type 1	Ensembl	90349	E9PI47:E9PKA3:E9PNB8:E9PRQ8:E9PRU1:E9PSC1:H0YCB5:H0YCR9:H0YET5:H0YEU0:O95967	NP_058634.4
Core matrisome	ECM Glycoproteins	EFEMP2	EGF-containing fibulin-like extracellular matrix protein 2	3219	Lethal arteriopathy syndrome due to fibulin-4 deficiency	Ensembl	314718	E9PI47:E9PKA3:E9PNB8:E9PRQ8:E9PRU1:E9PSC1:H0YCB5:H0YCR9:H0YET5:H0YEU0:O95967	NP_058634.4
Core matrisome	ECM Glycoproteins	EFEMP2	EGF-containing fibulin-like extracellular matrix protein 2	3219	Lethal arteriopathy syndrome due to fibulin-4 deficiency	NA	314718	E9PI47:E9PKA3:E9PNB8:E9PRQ8:E9PRU1:E9PSC1:H0YCB5:H0YCR9:H0YET5:H0YEU0:O95967	NP_058634.4
Core matrisome	ECM Glycoproteins	EFEMP2	EGF-containing fibulin-like extracellular matrix protein 2	3219	Lethal arteriopathy syndrome due to fibulin-4 deficiency	NA	314718	E9PI47:E9PKA3:E9PNB8:E9PRQ8:E9PRU1:E9PSC1:H0YCB5:H0YCR9:H0YET5:H0YEU0:O95967	NP_058634.4
Core matrisome	ECM Glycoproteins	EFEMP2	EGF-containing fibulin-like extracellular matrix protein 2	3219	Lethal arteriopathy syndrome due to fibulin-4 deficiency	NA	314718	E9PI47:E9PKA3:E9PNB8:E9PRQ8:E9PRU1:E9PSC1:H0YCB5:H0YCR9:H0YET5:H0YEU0:O95967	NP_058634.4
Core matrisome	ECM Glycoproteins	EFEMP2	EGF-containing fibulin-like extracellular matrix protein 2	3219	Lethal arteriopathy syndrome due to fibulin-4 deficiency	Genatlas	314718	E9PI47:E9PKA3:E9PNB8:E9PRQ8:E9PRU1:E9PSC1:H0YCB5:H0YCR9:H0YET5:H0YEU0:O95967	NP_058634.4
Core matrisome	ECM Glycoproteins	EFEMP2	EGF-containing fibulin-like extracellular matrix protein 2	3219	Lethal arteriopathy syndrome due to fibulin-4 deficiency	HGNC	314718	E9PI47:E9PKA3:E9PNB8:E9PRQ8:E9PRU1:E9PSC1:H0YCB5:H0YCR9:H0YET5:H0YEU0:O95967	NP_058634.4
Core matrisome	ECM Glycoproteins	EFEMP2	EGF-containing fibulin-like extracellular matrix protein 2	3219	Lethal arteriopathy syndrome due to fibulin-4 deficiency	OMIM	314718	E9PI47:E9PKA3:E9PNB8:E9PRQ8:E9PRU1:E9PSC1:H0YCB5:H0YCR9:H0YET5:H0YEU0:O95967	NP_058634.4
Core matrisome	ECM Glycoproteins	EFEMP2	EGF-containing fibulin-like extracellular matrix protein 2	3219	Lethal arteriopathy syndrome due to fibulin-4 deficiency	Reactome	314718	E9PI47:E9PKA3:E9PNB8:E9PRQ8:E9PRU1:E9PSC1:H0YCB5:H0YCR9:H0YET5:H0YEU0:O95967	NP_058634.4
Core matrisome	ECM Glycoproteins	EFEMP2	EGF-containing fibulin-like extracellular matrix protein 2	3219	Lethal arteriopathy syndrome due to fibulin-4 deficiency	SwissProt	314718	E9PI47:E9PKA3:E9PNB8:E9PRQ8:E9PRU1:E9PSC1:H0YCB5:H0YCR9:H0YET5:H0YEU0:O95967	NP_058634.4
Core matrisome	ECM Glycoproteins	EFEMP2	EGF-containing fibulin-like extracellular matrix protein 2	3219	Lethal arteriopathy syndrome due to fibulin-4 deficiency	NA	314718	E9PI47:E9PKA3:E9PNB8:E9PRQ8:E9PRU1:E9PSC1:H0YCB5:H0YCR9:H0YET5:H0YEU0:O95967	NP_058634.4
Core matrisome	ECM Glycoproteins	ELN	elastin	3327	Autosomal dominant cutis laxa	NA	90348	E7EN51:E7EN65:E7ENM0:E7ENW7:E7EP82:E7EQH8:E7ETP7:E7EWS8:E9PGX4:F8WAH6:G3V0G6:G5E950:H7C3K0:P15502	NP_000492.2:NP_001075221.1:NP_001075222.1:NP_001075223.1:NP_001075224.1:NP_001265844.1:NP_001265845.1:NP_001265841.1:NP_001265842.1:NP_001265843.1:NP_001265846.1
Core matrisome	ECM Glycoproteins	ELN	elastin	3327	Autosomal dominant cutis laxa	NA	90348	E7EN51:E7EN65:E7ENM0:E7ENW7:E7EP82:E7EQH8:E7ETP7:E7EWS8:E9PGX4:F8WAH6:G3V0G6:G5E950:H7C3K0:P15502	NP_000492.2:NP_001075221.1:NP_001075222.1:NP_001075223.1:NP_001075224.1:NP_001265844.1:NP_001265845.1:NP_001265841.1:NP_001265842.1:NP_001265843.1:NP_001265846.1
Core matrisome	ECM Glycoproteins	ELN	elastin	3327	Autosomal dominant cutis laxa	NA	90348	E7EN51:E7EN65:E7ENM0:E7ENW7:E7EP82:E7EQH8:E7ETP7:E7EWS8:E9PGX4:F8WAH6:G3V0G6:G5E950:H7C3K0:P15502	NP_000492.2:NP_001075221.1:NP_001075222.1:NP_001075223.1:NP_001075224.1:NP_001265844.1:NP_001265845.1:NP_001265841.1:NP_001265842.1:NP_001265843.1:NP_001265846.1
Core matrisome	ECM Glycoproteins	ELN	elastin	3327	Autosomal dominant cutis laxa	NA	90348	E7EN51:E7EN65:E7ENM0:E7ENW7:E7EP82:E7EQH8:E7ETP7:E7EWS8:E9PGX4:F8WAH6:G3V0G6:G5E950:H7C3K0:P15502	NP_000492.2:NP_001075221.1:NP_001075222.1:NP_001075223.1:NP_001075224.1:NP_001265844.1:NP_001265845.1:NP_001265841.1:NP_001265842.1:NP_001265843.1:NP_001265846.1
Core matrisome	ECM Glycoproteins	ELN	elastin	3327	Autosomal dominant cutis laxa	NA	90348	E7EN51:E7EN65:E7ENM0:E7ENW7:E7EP82:E7EQH8:E7ETP7:E7EWS8:E9PGX4:F8WAH6:G3V0G6:G5E950:H7C3K0:P15502	NP_000492.2:NP_001075221.1:NP_001075222.1:NP_001075223.1:NP_001075224.1:NP_001265844.1:NP_001265845.1:NP_001265841.1:NP_001265842.1:NP_001265843.1:NP_001265846.1
Core matrisome	ECM Glycoproteins	ELN	elastin	3327	Autosomal dominant cutis laxa	NA	90348	E7EN51:E7EN65:E7ENM0:E7ENW7:E7EP82:E7EQH8:E7ETP7:E7EWS8:E9PGX4:F8WAH6:G3V0G6:G5E950:H7C3K0:P15502	NP_000492.2:NP_001075221.1:NP_001075222.1:NP_001075223.1:NP_001075224.1:NP_001265844.1:NP_001265845.1:NP_001265841.1:NP_001265842.1:NP_001265843.1:NP_001265846.1
Core matrisome	ECM Glycoproteins	ELN	elastin	3327	Autosomal dominant cutis laxa	Genatlas	90348	E7EN51:E7EN65:E7ENM0:E7ENW7:E7EP82:E7EQH8:E7ETP7:E7EWS8:E9PGX4:F8WAH6:G3V0G6:G5E950:H7C3K0:P15502	NP_000492.2:NP_001075221.1:NP_001075222.1:NP_001075223.1:NP_001075224.1:NP_001265844.1:NP_001265845.1:NP_001265841.1:NP_001265842.1:NP_001265843.1:NP_001265846.1
Core matrisome	ECM Glycoproteins	ELN	elastin	3327	Autosomal dominant cutis laxa	HGNC	90348	E7EN51:E7EN65:E7ENM0:E7ENW7:E7EP82:E7EQH8:E7ETP7:E7EWS8:E9PGX4:F8WAH6:G3V0G6:G5E950:H7C3K0:P15502	NP_000492.2:NP_001075221.1:NP_001075222.1:NP_001075223.1:NP_001075224.1:NP_001265844.1:NP_001265845.1:NP_001265841.1:NP_001265842.1:NP_001265843.1:NP_001265846.1
Core matrisome	ECM Glycoproteins	ELN	elastin	3327	Autosomal dominant cutis laxa	OMIM	90348	E7EN51:E7EN65:E7ENM0:E7ENW7:E7EP82:E7EQH8:E7ETP7:E7EWS8:E9PGX4:F8WAH6:G3V0G6:G5E950:H7C3K0:P15502	NP_000492.2:NP_001075221.1:NP_001075222.1:NP_001075223.1:NP_001075224.1:NP_001265844.1:NP_001265845.1:NP_001265841.1:NP_001265842.1:NP_001265843.1:NP_001265846.1
Core matrisome	ECM Glycoproteins	ELN	elastin	3327	Autosomal dominant cutis laxa	Reactome	90348	E7EN51:E7EN65:E7ENM0:E7ENW7:E7EP82:E7EQH8:E7ETP7:E7EWS8:E9PGX4:F8WAH6:G3V0G6:G5E950:H7C3K0:P15502	NP_000492.2:NP_001075221.1:NP_001075222.1:NP_001075223.1:NP_001075224.1:NP_001265844.1:NP_001265845.1:NP_001265841.1:NP_001265842.1:NP_001265843.1:NP_001265846.1
Core matrisome	ECM Glycoproteins	ELN	elastin	3327	Autosomal dominant cutis laxa	SwissProt	90348	E7EN51:E7EN65:E7ENM0:E7ENW7:E7EP82:E7EQH8:E7ETP7:E7EWS8:E9PGX4:F8WAH6:G3V0G6:G5E950:H7C3K0:P15502	NP_000492.2:NP_001075221.1:NP_001075222.1:NP_001075223.1:NP_001075224.1:NP_001265844.1:NP_001265845.1:NP_001265841.1:NP_001265842.1:NP_001265843.1:NP_001265846.1
Core matrisome	ECM Glycoproteins	ELN	elastin	3327	Autosomal dominant cutis laxa	NA	90348	E7EN51:E7EN65:E7ENM0:E7ENW7:E7EP82:E7EQH8:E7ETP7:E7EWS8:E9PGX4:F8WAH6:G3V0G6:G5E950:H7C3K0:P15502	NP_000492.2:NP_001075221.1:NP_001075222.1:NP_001075223.1:NP_001075224.1:NP_001265844.1:NP_001265845.1:NP_001265841.1:NP_001265842.1:NP_001265843.1:NP_001265846.1
Core matrisome	ECM Glycoproteins	ELN	elastin	3327	Autosomal dominant cutis laxa	Ensembl	90348	E7EN51:E7EN65:E7ENM0:E7ENW7:E7EP82:E7EQH8:E7ETP7:E7EWS8:E9PGX4:F8WAH6:G3V0G6:G5E950:H7C3K0:P15502	NP_000492.2:NP_001075221.1:NP_001075222.1:NP_001075223.1:NP_001075224.1:NP_001265844.1:NP_001265845.1:NP_001265841.1:NP_001265842.1:NP_001265843.1:NP_001265846.1
Core matrisome	ECM Glycoproteins	ELN	elastin	3327	Familial thoracic aortic aneurysm and aortic dissection	Ensembl	91387	E7EN51:E7EN65:E7ENM0:E7ENW7:E7EP82:E7EQH8:E7ETP7:E7EWS8:E9PGX4:F8WAH6:G3V0G6:G5E950:H7C3K0:P15502	NP_000492.2:NP_001075221.1:NP_001075222.1:NP_001075223.1:NP_001075224.1:NP_001265844.1:NP_001265845.1:NP_001265841.1:NP_001265842.1:NP_001265843.1:NP_001265846.1
Core matrisome	ECM Glycoproteins	ELN	elastin	3327	Familial thoracic aortic aneurysm and aortic dissection	NA	91387	E7EN51:E7EN65:E7ENM0:E7ENW7:E7EP82:E7EQH8:E7ETP7:E7EWS8:E9PGX4:F8WAH6:G3V0G6:G5E950:H7C3K0:P15502	NP_000492.2:NP_001075221.1:NP_001075222.1:NP_001075223.1:NP_001075224.1:NP_001265844.1:NP_001265845.1:NP_001265841.1:NP_001265842.1:NP_001265843.1:NP_001265846.1
Core matrisome	ECM Glycoproteins	ELN	elastin	3327	Familial thoracic aortic aneurysm and aortic dissection	NA	91387	E7EN51:E7EN65:E7ENM0:E7ENW7:E7EP82:E7EQH8:E7ETP7:E7EWS8:E9PGX4:F8WAH6:G3V0G6:G5E950:H7C3K0:P15502	NP_000492.2:NP_001075221.1:NP_001075222.1:NP_001075223.1:NP_001075224.1:NP_001265844.1:NP_001265845.1:NP_001265841.1:NP_001265842.1:NP_001265843.1:NP_001265846.1
Core matrisome	ECM Glycoproteins	ELN	elastin	3327	Familial thoracic aortic aneurysm and aortic dissection	NA	91387	E7EN51:E7EN65:E7ENM0:E7ENW7:E7EP82:E7EQH8:E7ETP7:E7EWS8:E9PGX4:F8WAH6:G3V0G6:G5E950:H7C3K0:P15502	NP_000492.2:NP_001075221.1:NP_001075222.1:NP_001075223.1:NP_001075224.1:NP_001265844.1:NP_001265845.1:NP_001265841.1:NP_001265842.1:NP_001265843.1:NP_001265846.1
Core matrisome	ECM Glycoproteins	ELN	elastin	3327	Familial thoracic aortic aneurysm and aortic dissection	NA	91387	E7EN51:E7EN65:E7ENM0:E7ENW7:E7EP82:E7EQH8:E7ETP7:E7EWS8:E9PGX4:F8WAH6:G3V0G6:G5E950:H7C3K0:P15502	NP_000492.2:NP_001075221.1:NP_001075222.1:NP_001075223.1:NP_001075224.1:NP_001265844.1:NP_001265845.1:NP_001265841.1:NP_001265842.1:NP_001265843.1:NP_001265846.1
Core matrisome	ECM Glycoproteins	ELN	elastin	3327	Familial thoracic aortic aneurysm and aortic dissection	NA	91387	E7EN51:E7EN65:E7ENM0:E7ENW7:E7EP82:E7EQH8:E7ETP7:E7EWS8:E9PGX4:F8WAH6:G3V0G6:G5E950:H7C3K0:P15502	NP_000492.2:NP_001075221.1:NP_001075222.1:NP_001075223.1:NP_001075224.1:NP_001265844.1:NP_001265845.1:NP_001265841.1:NP_001265842.1:NP_001265843.1:NP_001265846.1
Core matrisome	ECM Glycoproteins	ELN	elastin	3327	Familial thoracic aortic aneurysm and aortic dissection	NA	91387	E7EN51:E7EN65:E7ENM0:E7ENW7:E7EP82:E7EQH8:E7ETP7:E7EWS8:E9PGX4:F8WAH6:G3V0G6:G5E950:H7C3K0:P15502	NP_000492.2:NP_001075221.1:NP_001075222.1:NP_001075223.1:NP_001075224.1:NP_001265844.1:NP_001265845.1:NP_001265841.1:NP_001265842.1:NP_001265843.1:NP_001265846.1
Core matrisome	ECM Glycoproteins	ELN	elastin	3327	Familial thoracic aortic aneurysm and aortic dissection	Genatlas	91387	E7EN51:E7EN65:E7ENM0:E7ENW7:E7EP82:E7EQH8:E7ETP7:E7EWS8:E9PGX4:F8WAH6:G3V0G6:G5E950:H7C3K0:P15502	NP_000492.2:NP_001075221.1:NP_001075222.1:NP_001075223.1:NP_001075224.1:NP_001265844.1:NP_001265845.1:NP_001265841.1:NP_001265842.1:NP_001265843.1:NP_001265846.1
Core matrisome	ECM Glycoproteins	ELN	elastin	3327	Familial thoracic aortic aneurysm and aortic dissection	HGNC	91387	E7EN51:E7EN65:E7ENM0:E7ENW7:E7EP82:E7EQH8:E7ETP7:E7EWS8:E9PGX4:F8WAH6:G3V0G6:G5E950:H7C3K0:P15502	NP_000492.2:NP_001075221.1:NP_001075222.1:NP_001075223.1:NP_001075224.1:NP_001265844.1:NP_001265845.1:NP_001265841.1:NP_001265842.1:NP_001265843.1:NP_001265846.1
Core matrisome	ECM Glycoproteins	ELN	elastin	3327	Familial thoracic aortic aneurysm and aortic dissection	OMIM	91387	E7EN51:E7EN65:E7ENM0:E7ENW7:E7EP82:E7EQH8:E7ETP7:E7EWS8:E9PGX4:F8WAH6:G3V0G6:G5E950:H7C3K0:P15502	NP_000492.2:NP_001075221.1:NP_001075222.1:NP_001075223.1:NP_001075224.1:NP_001265844.1:NP_001265845.1:NP_001265841.1:NP_001265842.1:NP_001265843.1:NP_001265846.1
Core matrisome	ECM Glycoproteins	ELN	elastin	3327	Familial thoracic aortic aneurysm and aortic dissection	Reactome	91387	E7EN51:E7EN65:E7ENM0:E7ENW7:E7EP82:E7EQH8:E7ETP7:E7EWS8:E9PGX4:F8WAH6:G3V0G6:G5E950:H7C3K0:P15502	NP_000492.2:NP_001075221.1:NP_001075222.1:NP_001075223.1:NP_001075224.1:NP_001265844.1:NP_001265845.1:NP_001265841.1:NP_001265842.1:NP_001265843.1:NP_001265846.1
Core matrisome	ECM Glycoproteins	ELN	elastin	3327	Familial thoracic aortic aneurysm and aortic dissection	SwissProt	91387	E7EN51:E7EN65:E7ENM0:E7ENW7:E7EP82:E7EQH8:E7ETP7:E7EWS8:E9PGX4:F8WAH6:G3V0G6:G5E950:H7C3K0:P15502	NP_000492.2:NP_001075221.1:NP_001075222.1:NP_001075223.1:NP_001075224.1:NP_001265844.1:NP_001265845.1:NP_001265841.1:NP_001265842.1:NP_001265843.1:NP_001265846.1
Core matrisome	ECM Glycoproteins	ELN	elastin	3327	Familial thoracic aortic aneurysm and aortic dissection	NA	91387	E7EN51:E7EN65:E7ENM0:E7ENW7:E7EP82:E7EQH8:E7ETP7:E7EWS8:E9PGX4:F8WAH6:G3V0G6:G5E950:H7C3K0:P15502	NP_000492.2:NP_001075221.1:NP_001075222.1:NP_001075223.1:NP_001075224.1:NP_001265844.1:NP_001265845.1:NP_001265841.1:NP_001265842.1:NP_001265843.1:NP_001265846.1
Core matrisome	ECM Glycoproteins	ELN	elastin	3327	Supravalvular aortic stenosis	Ensembl	3193	E7EN51:E7EN65:E7ENM0:E7ENW7:E7EP82:E7EQH8:E7ETP7:E7EWS8:E9PGX4:F8WAH6:G3V0G6:G5E950:H7C3K0:P15502	NP_000492.2:NP_001075221.1:NP_001075222.1:NP_001075223.1:NP_001075224.1:NP_001265844.1:NP_001265845.1:NP_001265841.1:NP_001265842.1:NP_001265843.1:NP_001265846.1
Core matrisome	ECM Glycoproteins	ELN	elastin	3327	Supravalvular aortic stenosis	NA	3193	E7EN51:E7EN65:E7ENM0:E7ENW7:E7EP82:E7EQH8:E7ETP7:E7EWS8:E9PGX4:F8WAH6:G3V0G6:G5E950:H7C3K0:P15502	NP_000492.2:NP_001075221.1:NP_001075222.1:NP_001075223.1:NP_001075224.1:NP_001265844.1:NP_001265845.1:NP_001265841.1:NP_001265842.1:NP_001265843.1:NP_001265846.1
Core matrisome	ECM Glycoproteins	ELN	elastin	3327	Supravalvular aortic stenosis	NA	3193	E7EN51:E7EN65:E7ENM0:E7ENW7:E7EP82:E7EQH8:E7ETP7:E7EWS8:E9PGX4:F8WAH6:G3V0G6:G5E950:H7C3K0:P15502	NP_000492.2:NP_001075221.1:NP_001075222.1:NP_001075223.1:NP_001075224.1:NP_001265844.1:NP_001265845.1:NP_001265841.1:NP_001265842.1:NP_001265843.1:NP_001265846.1
Core matrisome	ECM Glycoproteins	ELN	elastin	3327	Supravalvular aortic stenosis	NA	3193	E7EN51:E7EN65:E7ENM0:E7ENW7:E7EP82:E7EQH8:E7ETP7:E7EWS8:E9PGX4:F8WAH6:G3V0G6:G5E950:H7C3K0:P15502	NP_000492.2:NP_001075221.1:NP_001075222.1:NP_001075223.1:NP_001075224.1:NP_001265844.1:NP_001265845.1:NP_001265841.1:NP_001265842.1:NP_001265843.1:NP_001265846.1
Core matrisome	ECM Glycoproteins	ELN	elastin	3327	Supravalvular aortic stenosis	NA	3193	E7EN51:E7EN65:E7ENM0:E7ENW7:E7EP82:E7EQH8:E7ETP7:E7EWS8:E9PGX4:F8WAH6:G3V0G6:G5E950:H7C3K0:P15502	NP_000492.2:NP_001075221.1:NP_001075222.1:NP_001075223.1:NP_001075224.1:NP_001265844.1:NP_001265845.1:NP_001265841.1:NP_001265842.1:NP_001265843.1:NP_001265846.1
Core matrisome	ECM Glycoproteins	ELN	elastin	3327	Supravalvular aortic stenosis	NA	3193	E7EN51:E7EN65:E7ENM0:E7ENW7:E7EP82:E7EQH8:E7ETP7:E7EWS8:E9PGX4:F8WAH6:G3V0G6:G5E950:H7C3K0:P15502	NP_000492.2:NP_001075221.1:NP_001075222.1:NP_001075223.1:NP_001075224.1:NP_001265844.1:NP_001265845.1:NP_001265841.1:NP_001265842.1:NP_001265843.1:NP_001265846.1
Core matrisome	ECM Glycoproteins	ELN	elastin	3327	Supravalvular aortic stenosis	NA	3193	E7EN51:E7EN65:E7ENM0:E7ENW7:E7EP82:E7EQH8:E7ETP7:E7EWS8:E9PGX4:F8WAH6:G3V0G6:G5E950:H7C3K0:P15502	NP_000492.2:NP_001075221.1:NP_001075222.1:NP_001075223.1:NP_001075224.1:NP_001265844.1:NP_001265845.1:NP_001265841.1:NP_001265842.1:NP_001265843.1:NP_001265846.1
Core matrisome	ECM Glycoproteins	ELN	elastin	3327	Supravalvular aortic stenosis	Genatlas	3193	E7EN51:E7EN65:E7ENM0:E7ENW7:E7EP82:E7EQH8:E7ETP7:E7EWS8:E9PGX4:F8WAH6:G3V0G6:G5E950:H7C3K0:P15502	NP_000492.2:NP_001075221.1:NP_001075222.1:NP_001075223.1:NP_001075224.1:NP_001265844.1:NP_001265845.1:NP_001265841.1:NP_001265842.1:NP_001265843.1:NP_001265846.1
Core matrisome	ECM Glycoproteins	ELN	elastin	3327	Supravalvular aortic stenosis	HGNC	3193	E7EN51:E7EN65:E7ENM0:E7ENW7:E7EP82:E7EQH8:E7ETP7:E7EWS8:E9PGX4:F8WAH6:G3V0G6:G5E950:H7C3K0:P15502	NP_000492.2:NP_001075221.1:NP_001075222.1:NP_001075223.1:NP_001075224.1:NP_001265844.1:NP_001265845.1:NP_001265841.1:NP_001265842.1:NP_001265843.1:NP_001265846.1
Core matrisome	ECM Glycoproteins	ELN	elastin	3327	Supravalvular aortic stenosis	OMIM	3193	E7EN51:E7EN65:E7ENM0:E7ENW7:E7EP82:E7EQH8:E7ETP7:E7EWS8:E9PGX4:F8WAH6:G3V0G6:G5E950:H7C3K0:P15502	NP_000492.2:NP_001075221.1:NP_001075222.1:NP_001075223.1:NP_001075224.1:NP_001265844.1:NP_001265845.1:NP_001265841.1:NP_001265842.1:NP_001265843.1:NP_001265846.1
Core matrisome	ECM Glycoproteins	ELN	elastin	3327	Supravalvular aortic stenosis	Reactome	3193	E7EN51:E7EN65:E7ENM0:E7ENW7:E7EP82:E7EQH8:E7ETP7:E7EWS8:E9PGX4:F8WAH6:G3V0G6:G5E950:H7C3K0:P15502	NP_000492.2:NP_001075221.1:NP_001075222.1:NP_001075223.1:NP_001075224.1:NP_001265844.1:NP_001265845.1:NP_001265841.1:NP_001265842.1:NP_001265843.1:NP_001265846.1
Core matrisome	ECM Glycoproteins	ELN	elastin	3327	Supravalvular aortic stenosis	SwissProt	3193	E7EN51:E7EN65:E7ENM0:E7ENW7:E7EP82:E7EQH8:E7ETP7:E7EWS8:E9PGX4:F8WAH6:G3V0G6:G5E950:H7C3K0:P15502	NP_000492.2:NP_001075221.1:NP_001075222.1:NP_001075223.1:NP_001075224.1:NP_001265844.1:NP_001265845.1:NP_001265841.1:NP_001265842.1:NP_001265843.1:NP_001265846.1
Core matrisome	ECM Glycoproteins	ELN	elastin	3327	Supravalvular aortic stenosis	NA	3193	E7EN51:E7EN65:E7ENM0:E7ENW7:E7EP82:E7EQH8:E7ETP7:E7EWS8:E9PGX4:F8WAH6:G3V0G6:G5E950:H7C3K0:P15502	NP_000492.2:NP_001075221.1:NP_001075222.1:NP_001075223.1:NP_001075224.1:NP_001265844.1:NP_001265845.1:NP_001265841.1:NP_001265842.1:NP_001265843.1:NP_001265846.1
Core matrisome	ECM Glycoproteins	ELN	elastin	3327	Williams syndrome	Ensembl	904	E7EN51:E7EN65:E7ENM0:E7ENW7:E7EP82:E7EQH8:E7ETP7:E7EWS8:E9PGX4:F8WAH6:G3V0G6:G5E950:H7C3K0:P15502	NP_000492.2:NP_001075221.1:NP_001075222.1:NP_001075223.1:NP_001075224.1:NP_001265844.1:NP_001265845.1:NP_001265841.1:NP_001265842.1:NP_001265843.1:NP_001265846.1
Core matrisome	ECM Glycoproteins	ELN	elastin	3327	Williams syndrome	NA	904	E7EN51:E7EN65:E7ENM0:E7ENW7:E7EP82:E7EQH8:E7ETP7:E7EWS8:E9PGX4:F8WAH6:G3V0G6:G5E950:H7C3K0:P15502	NP_000492.2:NP_001075221.1:NP_001075222.1:NP_001075223.1:NP_001075224.1:NP_001265844.1:NP_001265845.1:NP_001265841.1:NP_001265842.1:NP_001265843.1:NP_001265846.1
Core matrisome	ECM Glycoproteins	ELN	elastin	3327	Williams syndrome	NA	904	E7EN51:E7EN65:E7ENM0:E7ENW7:E7EP82:E7EQH8:E7ETP7:E7EWS8:E9PGX4:F8WAH6:G3V0G6:G5E950:H7C3K0:P15502	NP_000492.2:NP_001075221.1:NP_001075222.1:NP_001075223.1:NP_001075224.1:NP_001265844.1:NP_001265845.1:NP_001265841.1:NP_001265842.1:NP_001265843.1:NP_001265846.1
Core matrisome	ECM Glycoproteins	ELN	elastin	3327	Williams syndrome	NA	904	E7EN51:E7EN65:E7ENM0:E7ENW7:E7EP82:E7EQH8:E7ETP7:E7EWS8:E9PGX4:F8WAH6:G3V0G6:G5E950:H7C3K0:P15502	NP_000492.2:NP_001075221.1:NP_001075222.1:NP_001075223.1:NP_001075224.1:NP_001265844.1:NP_001265845.1:NP_001265841.1:NP_001265842.1:NP_001265843.1:NP_001265846.1
Core matrisome	ECM Glycoproteins	ELN	elastin	3327	Williams syndrome	NA	904	E7EN51:E7EN65:E7ENM0:E7ENW7:E7EP82:E7EQH8:E7ETP7:E7EWS8:E9PGX4:F8WAH6:G3V0G6:G5E950:H7C3K0:P15502	NP_000492.2:NP_001075221.1:NP_001075222.1:NP_001075223.1:NP_001075224.1:NP_001265844.1:NP_001265845.1:NP_001265841.1:NP_001265842.1:NP_001265843.1:NP_001265846.1
Core matrisome	ECM Glycoproteins	ELN	elastin	3327	Williams syndrome	NA	904	E7EN51:E7EN65:E7ENM0:E7ENW7:E7EP82:E7EQH8:E7ETP7:E7EWS8:E9PGX4:F8WAH6:G3V0G6:G5E950:H7C3K0:P15502	NP_000492.2:NP_001075221.1:NP_001075222.1:NP_001075223.1:NP_001075224.1:NP_001265844.1:NP_001265845.1:NP_001265841.1:NP_001265842.1:NP_001265843.1:NP_001265846.1
Core matrisome	ECM Glycoproteins	ELN	elastin	3327	Williams syndrome	NA	904	E7EN51:E7EN65:E7ENM0:E7ENW7:E7EP82:E7EQH8:E7ETP7:E7EWS8:E9PGX4:F8WAH6:G3V0G6:G5E950:H7C3K0:P15502	NP_000492.2:NP_001075221.1:NP_001075222.1:NP_001075223.1:NP_001075224.1:NP_001265844.1:NP_001265845.1:NP_001265841.1:NP_001265842.1:NP_001265843.1:NP_001265846.1
Core matrisome	ECM Glycoproteins	ELN	elastin	3327	Williams syndrome	Genatlas	904	E7EN51:E7EN65:E7ENM0:E7ENW7:E7EP82:E7EQH8:E7ETP7:E7EWS8:E9PGX4:F8WAH6:G3V0G6:G5E950:H7C3K0:P15502	NP_000492.2:NP_001075221.1:NP_001075222.1:NP_001075223.1:NP_001075224.1:NP_001265844.1:NP_001265845.1:NP_001265841.1:NP_001265842.1:NP_001265843.1:NP_001265846.1
Core matrisome	ECM Glycoproteins	ELN	elastin	3327	Williams syndrome	HGNC	904	E7EN51:E7EN65:E7ENM0:E7ENW7:E7EP82:E7EQH8:E7ETP7:E7EWS8:E9PGX4:F8WAH6:G3V0G6:G5E950:H7C3K0:P15502	NP_000492.2:NP_001075221.1:NP_001075222.1:NP_001075223.1:NP_001075224.1:NP_001265844.1:NP_001265845.1:NP_001265841.1:NP_001265842.1:NP_001265843.1:NP_001265846.1
Core matrisome	ECM Glycoproteins	ELN	elastin	3327	Williams syndrome	OMIM	904	E7EN51:E7EN65:E7ENM0:E7ENW7:E7EP82:E7EQH8:E7ETP7:E7EWS8:E9PGX4:F8WAH6:G3V0G6:G5E950:H7C3K0:P15502	NP_000492.2:NP_001075221.1:NP_001075222.1:NP_001075223.1:NP_001075224.1:NP_001265844.1:NP_001265845.1:NP_001265841.1:NP_001265842.1:NP_001265843.1:NP_001265846.1
Core matrisome	ECM Glycoproteins	ELN	elastin	3327	Williams syndrome	Reactome	904	E7EN51:E7EN65:E7ENM0:E7ENW7:E7EP82:E7EQH8:E7ETP7:E7EWS8:E9PGX4:F8WAH6:G3V0G6:G5E950:H7C3K0:P15502	NP_000492.2:NP_001075221.1:NP_001075222.1:NP_001075223.1:NP_001075224.1:NP_001265844.1:NP_001265845.1:NP_001265841.1:NP_001265842.1:NP_001265843.1:NP_001265846.1
Core matrisome	ECM Glycoproteins	ELN	elastin	3327	Williams syndrome	SwissProt	904	E7EN51:E7EN65:E7ENM0:E7ENW7:E7EP82:E7EQH8:E7ETP7:E7EWS8:E9PGX4:F8WAH6:G3V0G6:G5E950:H7C3K0:P15502	NP_000492.2:NP_001075221.1:NP_001075222.1:NP_001075223.1:NP_001075224.1:NP_001265844.1:NP_001265845.1:NP_001265841.1:NP_001265842.1:NP_001265843.1:NP_001265846.1
Core matrisome	ECM Glycoproteins	ELN	elastin	3327	Williams syndrome	NA	904	E7EN51:E7EN65:E7ENM0:E7ENW7:E7EP82:E7EQH8:E7ETP7:E7EWS8:E9PGX4:F8WAH6:G3V0G6:G5E950:H7C3K0:P15502	NP_000492.2:NP_001075221.1:NP_001075222.1:NP_001075223.1:NP_001075224.1:NP_001265844.1:NP_001265845.1:NP_001265841.1:NP_001265842.1:NP_001265843.1:NP_001265846.1
Core matrisome	ECM Glycoproteins	EMILIN1	elastin microfibril interfacer 1	19880	EMILIN-1-related connective tissue disease	NA	485418	H0Y7A0:Q9Y6C2	NP_008977.1
Core matrisome	ECM Glycoproteins	EMILIN1	elastin microfibril interfacer 1	19880	EMILIN-1-related connective tissue disease	NA	485418	H0Y7A0:Q9Y6C2	NP_008977.1
Core matrisome	ECM Glycoproteins	EMILIN1	elastin microfibril interfacer 1	19880	EMILIN-1-related connective tissue disease	Reactome	485418	H0Y7A0:Q9Y6C2	NP_008977.1
Core matrisome	ECM Glycoproteins	EMILIN1	elastin microfibril interfacer 1	19880	EMILIN-1-related connective tissue disease	SwissProt	485418	H0Y7A0:Q9Y6C2	NP_008977.1
Core matrisome	ECM Glycoproteins	EMILIN1	elastin microfibril interfacer 1	19880	EMILIN-1-related connective tissue disease	OMIM	485418	H0Y7A0:Q9Y6C2	NP_008977.1
Core matrisome	ECM Glycoproteins	EMILIN1	elastin microfibril interfacer 1	19880	EMILIN-1-related connective tissue disease	Genatlas	485418	H0Y7A0:Q9Y6C2	NP_008977.1
Core matrisome	ECM Glycoproteins	EMILIN1	elastin microfibril interfacer 1	19880	EMILIN-1-related connective tissue disease	HGNC	485418	H0Y7A0:Q9Y6C2	NP_008977.1
Core matrisome	ECM Glycoproteins	EMILIN1	elastin microfibril interfacer 1	19880	EMILIN-1-related connective tissue disease	NA	485418	H0Y7A0:Q9Y6C2	NP_008977.1
Core matrisome	ECM Glycoproteins	EMILIN1	elastin microfibril interfacer 1	19880	EMILIN-1-related connective tissue disease	Ensembl	485418	H0Y7A0:Q9Y6C2	NP_008977.1
Core matrisome	ECM Glycoproteins	EYS	eyes shut homolog (Drosophila)	21555	Retinitis pigmentosa	Ensembl	791	F8WDD3:H0Y3Q4:Q5T1H1	NP_001136272.1:NP_001136273.1:NP_938024.1
Core matrisome	ECM Glycoproteins	EYS	eyes shut homolog (Drosophila)	21555	Retinitis pigmentosa	NA	791	F8WDD3:H0Y3Q4:Q5T1H1	NP_001136272.1:NP_001136273.1:NP_938024.1
Core matrisome	ECM Glycoproteins	EYS	eyes shut homolog (Drosophila)	21555	Retinitis pigmentosa	NA	791	F8WDD3:H0Y3Q4:Q5T1H1	NP_001136272.1:NP_001136273.1:NP_938024.1
Core matrisome	ECM Glycoproteins	EYS	eyes shut homolog (Drosophila)	21555	Retinitis pigmentosa	NA	791	F8WDD3:H0Y3Q4:Q5T1H1	NP_001136272.1:NP_001136273.1:NP_938024.1
Core matrisome	ECM Glycoproteins	EYS	eyes shut homolog (Drosophila)	21555	Retinitis pigmentosa	NA	791	F8WDD3:H0Y3Q4:Q5T1H1	NP_001136272.1:NP_001136273.1:NP_938024.1
Core matrisome	ECM Glycoproteins	EYS	eyes shut homolog (Drosophila)	21555	Retinitis pigmentosa	NA	791	F8WDD3:H0Y3Q4:Q5T1H1	NP_001136272.1:NP_001136273.1:NP_938024.1
Core matrisome	ECM Glycoproteins	EYS	eyes shut homolog (Drosophila)	21555	Retinitis pigmentosa	NA	791	F8WDD3:H0Y3Q4:Q5T1H1	NP_001136272.1:NP_001136273.1:NP_938024.1
Core matrisome	ECM Glycoproteins	EYS	eyes shut homolog (Drosophila)	21555	Retinitis pigmentosa	Genatlas	791	F8WDD3:H0Y3Q4:Q5T1H1	NP_001136272.1:NP_001136273.1:NP_938024.1
Core matrisome	ECM Glycoproteins	EYS	eyes shut homolog (Drosophila)	21555	Retinitis pigmentosa	HGNC	791	F8WDD3:H0Y3Q4:Q5T1H1	NP_001136272.1:NP_001136273.1:NP_938024.1
Core matrisome	ECM Glycoproteins	EYS	eyes shut homolog (Drosophila)	21555	Retinitis pigmentosa	OMIM	791	F8WDD3:H0Y3Q4:Q5T1H1	NP_001136272.1:NP_001136273.1:NP_938024.1
Core matrisome	ECM Glycoproteins	EYS	eyes shut homolog (Drosophila)	21555	Retinitis pigmentosa	SwissProt	791	F8WDD3:H0Y3Q4:Q5T1H1	NP_001136272.1:NP_001136273.1:NP_938024.1
Core matrisome	ECM Glycoproteins	EYS	eyes shut homolog (Drosophila)	21555	Retinitis pigmentosa	NA	791	F8WDD3:H0Y3Q4:Q5T1H1	NP_001136272.1:NP_001136273.1:NP_938024.1
Core matrisome	ECM Glycoproteins	FBLN1	fibulin 1	3600	FBLN1-related developmental delay-central nervous system anomaly-syndactyly syndrome	NA	404451	B1AHL2:B1AHM4:B1AHM5:B1AHM6:B1AHM7:B1AHM8:B1AHM9:B1AHN3:F8W7M9:H7C1M6:P23142	NP_001987.2:NP_006476.2:NP_006477.2:NP_006478.2
Core matrisome	ECM Glycoproteins	FBLN1	fibulin 1	3600	FBLN1-related developmental delay-central nervous system anomaly-syndactyly syndrome	Genatlas	404451	B1AHL2:B1AHM4:B1AHM5:B1AHM6:B1AHM7:B1AHM8:B1AHM9:B1AHN3:F8W7M9:H7C1M6:P23142	NP_001987.2:NP_006476.2:NP_006477.2:NP_006478.2
Core matrisome	ECM Glycoproteins	FBLN1	fibulin 1	3600	FBLN1-related developmental delay-central nervous system anomaly-syndactyly syndrome	HGNC	404451	B1AHL2:B1AHM4:B1AHM5:B1AHM6:B1AHM7:B1AHM8:B1AHM9:B1AHN3:F8W7M9:H7C1M6:P23142	NP_001987.2:NP_006476.2:NP_006477.2:NP_006478.2
Core matrisome	ECM Glycoproteins	FBLN1	fibulin 1	3600	FBLN1-related developmental delay-central nervous system anomaly-syndactyly syndrome	OMIM	404451	B1AHL2:B1AHM4:B1AHM5:B1AHM6:B1AHM7:B1AHM8:B1AHM9:B1AHN3:F8W7M9:H7C1M6:P23142	NP_001987.2:NP_006476.2:NP_006477.2:NP_006478.2
Core matrisome	ECM Glycoproteins	FBLN1	fibulin 1	3600	FBLN1-related developmental delay-central nervous system anomaly-syndactyly syndrome	Reactome	404451	B1AHL2:B1AHM4:B1AHM5:B1AHM6:B1AHM7:B1AHM8:B1AHM9:B1AHN3:F8W7M9:H7C1M6:P23142	NP_001987.2:NP_006476.2:NP_006477.2:NP_006478.2
Core matrisome	ECM Glycoproteins	FBLN1	fibulin 1	3600	FBLN1-related developmental delay-central nervous system anomaly-syndactyly syndrome	SwissProt	404451	B1AHL2:B1AHM4:B1AHM5:B1AHM6:B1AHM7:B1AHM8:B1AHM9:B1AHN3:F8W7M9:H7C1M6:P23142	NP_001987.2:NP_006476.2:NP_006477.2:NP_006478.2
Core matrisome	ECM Glycoproteins	FBLN1	fibulin 1	3600	FBLN1-related developmental delay-central nervous system anomaly-syndactyly syndrome	NA	404451	B1AHL2:B1AHM4:B1AHM5:B1AHM6:B1AHM7:B1AHM8:B1AHM9:B1AHN3:F8W7M9:H7C1M6:P23142	NP_001987.2:NP_006476.2:NP_006477.2:NP_006478.2
Core matrisome	ECM Glycoproteins	FBLN1	fibulin 1	3600	FBLN1-related developmental delay-central nervous system anomaly-syndactyly syndrome	Ensembl	404451	B1AHL2:B1AHM4:B1AHM5:B1AHM6:B1AHM7:B1AHM8:B1AHM9:B1AHN3:F8W7M9:H7C1M6:P23142	NP_001987.2:NP_006476.2:NP_006477.2:NP_006478.2
Core matrisome	ECM Glycoproteins	FBLN1	fibulin 1	3600	Synpolydactyly type 2	Ensembl	295197	B1AHL2:B1AHM4:B1AHM5:B1AHM6:B1AHM7:B1AHM8:B1AHM9:B1AHN3:F8W7M9:H7C1M6:P23142	NP_001987.2:NP_006476.2:NP_006477.2:NP_006478.2
Core matrisome	ECM Glycoproteins	FBLN1	fibulin 1	3600	Synpolydactyly type 2	NA	295197	B1AHL2:B1AHM4:B1AHM5:B1AHM6:B1AHM7:B1AHM8:B1AHM9:B1AHN3:F8W7M9:H7C1M6:P23142	NP_001987.2:NP_006476.2:NP_006477.2:NP_006478.2
Core matrisome	ECM Glycoproteins	FBLN1	fibulin 1	3600	Synpolydactyly type 2	Genatlas	295197	B1AHL2:B1AHM4:B1AHM5:B1AHM6:B1AHM7:B1AHM8:B1AHM9:B1AHN3:F8W7M9:H7C1M6:P23142	NP_001987.2:NP_006476.2:NP_006477.2:NP_006478.2
Core matrisome	ECM Glycoproteins	FBLN1	fibulin 1	3600	Synpolydactyly type 2	HGNC	295197	B1AHL2:B1AHM4:B1AHM5:B1AHM6:B1AHM7:B1AHM8:B1AHM9:B1AHN3:F8W7M9:H7C1M6:P23142	NP_001987.2:NP_006476.2:NP_006477.2:NP_006478.2
Core matrisome	ECM Glycoproteins	FBLN1	fibulin 1	3600	Synpolydactyly type 2	OMIM	295197	B1AHL2:B1AHM4:B1AHM5:B1AHM6:B1AHM7:B1AHM8:B1AHM9:B1AHN3:F8W7M9:H7C1M6:P23142	NP_001987.2:NP_006476.2:NP_006477.2:NP_006478.2
Core matrisome	ECM Glycoproteins	FBLN1	fibulin 1	3600	Synpolydactyly type 2	Reactome	295197	B1AHL2:B1AHM4:B1AHM5:B1AHM6:B1AHM7:B1AHM8:B1AHM9:B1AHN3:F8W7M9:H7C1M6:P23142	NP_001987.2:NP_006476.2:NP_006477.2:NP_006478.2
Core matrisome	ECM Glycoproteins	FBLN1	fibulin 1	3600	Synpolydactyly type 2	SwissProt	295197	B1AHL2:B1AHM4:B1AHM5:B1AHM6:B1AHM7:B1AHM8:B1AHM9:B1AHN3:F8W7M9:H7C1M6:P23142	NP_001987.2:NP_006476.2:NP_006477.2:NP_006478.2
Core matrisome	ECM Glycoproteins	FBLN1	fibulin 1	3600	Synpolydactyly type 2	NA	295197	B1AHL2:B1AHM4:B1AHM5:B1AHM6:B1AHM7:B1AHM8:B1AHM9:B1AHN3:F8W7M9:H7C1M6:P23142	NP_001987.2:NP_006476.2:NP_006477.2:NP_006478.2
Core matrisome	ECM Glycoproteins	FBLN5	fibulin 5	3602	Autosomal dominant cutis laxa	NA	90348	G3V2P8:G3V329:G3V3Y2:G3V4U0:G3XA98:H0YJ31:Q9UBX5	NP_006320.2
Core matrisome	ECM Glycoproteins	FBLN5	fibulin 5	3602	Autosomal dominant cutis laxa	NA	90348	G3V2P8:G3V329:G3V3Y2:G3V4U0:G3XA98:H0YJ31:Q9UBX5	NP_006320.2
Core matrisome	ECM Glycoproteins	FBLN5	fibulin 5	3602	Autosomal dominant cutis laxa	NA	90348	G3V2P8:G3V329:G3V3Y2:G3V4U0:G3XA98:H0YJ31:Q9UBX5	NP_006320.2
Core matrisome	ECM Glycoproteins	FBLN5	fibulin 5	3602	Autosomal dominant cutis laxa	NA	90348	G3V2P8:G3V329:G3V3Y2:G3V4U0:G3XA98:H0YJ31:Q9UBX5	NP_006320.2
Core matrisome	ECM Glycoproteins	FBLN5	fibulin 5	3602	Autosomal dominant cutis laxa	Genatlas	90348	G3V2P8:G3V329:G3V3Y2:G3V4U0:G3XA98:H0YJ31:Q9UBX5	NP_006320.2
Core matrisome	ECM Glycoproteins	FBLN5	fibulin 5	3602	Autosomal dominant cutis laxa	HGNC	90348	G3V2P8:G3V329:G3V3Y2:G3V4U0:G3XA98:H0YJ31:Q9UBX5	NP_006320.2
Core matrisome	ECM Glycoproteins	FBLN5	fibulin 5	3602	Autosomal dominant cutis laxa	OMIM	90348	G3V2P8:G3V329:G3V3Y2:G3V4U0:G3XA98:H0YJ31:Q9UBX5	NP_006320.2
Core matrisome	ECM Glycoproteins	FBLN5	fibulin 5	3602	Autosomal dominant cutis laxa	Reactome	90348	G3V2P8:G3V329:G3V3Y2:G3V4U0:G3XA98:H0YJ31:Q9UBX5	NP_006320.2
Core matrisome	ECM Glycoproteins	FBLN5	fibulin 5	3602	Autosomal dominant cutis laxa	SwissProt	90348	G3V2P8:G3V329:G3V3Y2:G3V4U0:G3XA98:H0YJ31:Q9UBX5	NP_006320.2
Core matrisome	ECM Glycoproteins	FBLN5	fibulin 5	3602	Autosomal dominant cutis laxa	NA	90348	G3V2P8:G3V329:G3V3Y2:G3V4U0:G3XA98:H0YJ31:Q9UBX5	NP_006320.2
Core matrisome	ECM Glycoproteins	FBLN5	fibulin 5	3602	Autosomal dominant cutis laxa	Ensembl	90348	G3V2P8:G3V329:G3V3Y2:G3V4U0:G3XA98:H0YJ31:Q9UBX5	NP_006320.2
Core matrisome	ECM Glycoproteins	FBLN5	fibulin 5	3602	Autosomal recessive cutis laxa type 1	NA	90349	G3V2P8:G3V329:G3V3Y2:G3V4U0:G3XA98:H0YJ31:Q9UBX5	NP_006320.2
Core matrisome	ECM Glycoproteins	FBLN5	fibulin 5	3602	Autosomal recessive cutis laxa type 1	NA	90349	G3V2P8:G3V329:G3V3Y2:G3V4U0:G3XA98:H0YJ31:Q9UBX5	NP_006320.2
Core matrisome	ECM Glycoproteins	FBLN5	fibulin 5	3602	Autosomal recessive cutis laxa type 1	NA	90349	G3V2P8:G3V329:G3V3Y2:G3V4U0:G3XA98:H0YJ31:Q9UBX5	NP_006320.2
Core matrisome	ECM Glycoproteins	FBLN5	fibulin 5	3602	Autosomal recessive cutis laxa type 1	NA	90349	G3V2P8:G3V329:G3V3Y2:G3V4U0:G3XA98:H0YJ31:Q9UBX5	NP_006320.2
Core matrisome	ECM Glycoproteins	FBLN5	fibulin 5	3602	Autosomal recessive cutis laxa type 1	Genatlas	90349	G3V2P8:G3V329:G3V3Y2:G3V4U0:G3XA98:H0YJ31:Q9UBX5	NP_006320.2
Core matrisome	ECM Glycoproteins	FBLN5	fibulin 5	3602	Autosomal recessive cutis laxa type 1	HGNC	90349	G3V2P8:G3V329:G3V3Y2:G3V4U0:G3XA98:H0YJ31:Q9UBX5	NP_006320.2
Core matrisome	ECM Glycoproteins	FBLN5	fibulin 5	3602	Autosomal recessive cutis laxa type 1	OMIM	90349	G3V2P8:G3V329:G3V3Y2:G3V4U0:G3XA98:H0YJ31:Q9UBX5	NP_006320.2
Core matrisome	ECM Glycoproteins	FBLN5	fibulin 5	3602	Autosomal recessive cutis laxa type 1	Reactome	90349	G3V2P8:G3V329:G3V3Y2:G3V4U0:G3XA98:H0YJ31:Q9UBX5	NP_006320.2
Core matrisome	ECM Glycoproteins	FBLN5	fibulin 5	3602	Autosomal recessive cutis laxa type 1	SwissProt	90349	G3V2P8:G3V329:G3V3Y2:G3V4U0:G3XA98:H0YJ31:Q9UBX5	NP_006320.2
Core matrisome	ECM Glycoproteins	FBLN5	fibulin 5	3602	Autosomal recessive cutis laxa type 1	NA	90349	G3V2P8:G3V329:G3V3Y2:G3V4U0:G3XA98:H0YJ31:Q9UBX5	NP_006320.2
Core matrisome	ECM Glycoproteins	FBLN5	fibulin 5	3602	Autosomal recessive cutis laxa type 1	Ensembl	90349	G3V2P8:G3V329:G3V3Y2:G3V4U0:G3XA98:H0YJ31:Q9UBX5	NP_006320.2
Core matrisome	ECM Glycoproteins	FBLN5	fibulin 5	3602	Hereditary sensorimotor neuropathy with hyperelastic skin	Ensembl	280598	G3V2P8:G3V329:G3V3Y2:G3V4U0:G3XA98:H0YJ31:Q9UBX5	NP_006320.2
Core matrisome	ECM Glycoproteins	FBLN5	fibulin 5	3602	Hereditary sensorimotor neuropathy with hyperelastic skin	NA	280598	G3V2P8:G3V329:G3V3Y2:G3V4U0:G3XA98:H0YJ31:Q9UBX5	NP_006320.2
Core matrisome	ECM Glycoproteins	FBLN5	fibulin 5	3602	Hereditary sensorimotor neuropathy with hyperelastic skin	NA	280598	G3V2P8:G3V329:G3V3Y2:G3V4U0:G3XA98:H0YJ31:Q9UBX5	NP_006320.2
Core matrisome	ECM Glycoproteins	FBLN5	fibulin 5	3602	Hereditary sensorimotor neuropathy with hyperelastic skin	NA	280598	G3V2P8:G3V329:G3V3Y2:G3V4U0:G3XA98:H0YJ31:Q9UBX5	NP_006320.2
Core matrisome	ECM Glycoproteins	FBLN5	fibulin 5	3602	Hereditary sensorimotor neuropathy with hyperelastic skin	NA	280598	G3V2P8:G3V329:G3V3Y2:G3V4U0:G3XA98:H0YJ31:Q9UBX5	NP_006320.2
Core matrisome	ECM Glycoproteins	FBLN5	fibulin 5	3602	Hereditary sensorimotor neuropathy with hyperelastic skin	Genatlas	280598	G3V2P8:G3V329:G3V3Y2:G3V4U0:G3XA98:H0YJ31:Q9UBX5	NP_006320.2
Core matrisome	ECM Glycoproteins	FBLN5	fibulin 5	3602	Hereditary sensorimotor neuropathy with hyperelastic skin	HGNC	280598	G3V2P8:G3V329:G3V3Y2:G3V4U0:G3XA98:H0YJ31:Q9UBX5	NP_006320.2
Core matrisome	ECM Glycoproteins	FBLN5	fibulin 5	3602	Hereditary sensorimotor neuropathy with hyperelastic skin	OMIM	280598	G3V2P8:G3V329:G3V3Y2:G3V4U0:G3XA98:H0YJ31:Q9UBX5	NP_006320.2
Core matrisome	ECM Glycoproteins	FBLN5	fibulin 5	3602	Hereditary sensorimotor neuropathy with hyperelastic skin	Reactome	280598	G3V2P8:G3V329:G3V3Y2:G3V4U0:G3XA98:H0YJ31:Q9UBX5	NP_006320.2
Core matrisome	ECM Glycoproteins	FBLN5	fibulin 5	3602	Hereditary sensorimotor neuropathy with hyperelastic skin	SwissProt	280598	G3V2P8:G3V329:G3V3Y2:G3V4U0:G3XA98:H0YJ31:Q9UBX5	NP_006320.2
Core matrisome	ECM Glycoproteins	FBLN5	fibulin 5	3602	Hereditary sensorimotor neuropathy with hyperelastic skin	NA	280598	G3V2P8:G3V329:G3V3Y2:G3V4U0:G3XA98:H0YJ31:Q9UBX5	NP_006320.2
Core matrisome	ECM Glycoproteins	FBN1	fibrillin 1	3603	Acromicric dysplasia	NA	969	F6U495:H0YN80:H0YND0:P35555	NP_000129.3
Core matrisome	ECM Glycoproteins	FBN1	fibrillin 1	3603	Acromicric dysplasia	NA	969	F6U495:H0YN80:H0YND0:P35555	NP_000129.3
Core matrisome	ECM Glycoproteins	FBN1	fibrillin 1	3603	Acromicric dysplasia	NA	969	F6U495:H0YN80:H0YND0:P35555	NP_000129.3
Core matrisome	ECM Glycoproteins	FBN1	fibrillin 1	3603	Acromicric dysplasia	NA	969	F6U495:H0YN80:H0YND0:P35555	NP_000129.3
Core matrisome	ECM Glycoproteins	FBN1	fibrillin 1	3603	Acromicric dysplasia	NA	969	F6U495:H0YN80:H0YND0:P35555	NP_000129.3
Core matrisome	ECM Glycoproteins	FBN1	fibrillin 1	3603	Acromicric dysplasia	Genatlas	969	F6U495:H0YN80:H0YND0:P35555	NP_000129.3
Core matrisome	ECM Glycoproteins	FBN1	fibrillin 1	3603	Acromicric dysplasia	HGNC	969	F6U495:H0YN80:H0YND0:P35555	NP_000129.3
Core matrisome	ECM Glycoproteins	FBN1	fibrillin 1	3603	Acromicric dysplasia	OMIM	969	F6U495:H0YN80:H0YND0:P35555	NP_000129.3
Core matrisome	ECM Glycoproteins	FBN1	fibrillin 1	3603	Acromicric dysplasia	Reactome	969	F6U495:H0YN80:H0YND0:P35555	NP_000129.3
Core matrisome	ECM Glycoproteins	FBN1	fibrillin 1	3603	Acromicric dysplasia	SwissProt	969	F6U495:H0YN80:H0YND0:P35555	NP_000129.3
Core matrisome	ECM Glycoproteins	FBN1	fibrillin 1	3603	Acromicric dysplasia	NA	969	F6U495:H0YN80:H0YND0:P35555	NP_000129.3
Core matrisome	ECM Glycoproteins	FBN1	fibrillin 1	3603	Acromicric dysplasia	Ensembl	969	F6U495:H0YN80:H0YND0:P35555	NP_000129.3
Core matrisome	ECM Glycoproteins	FBN1	fibrillin 1	3603	Familial thoracic aortic aneurysm and aortic dissection	Ensembl	91387	F6U495:H0YN80:H0YND0:P35555	NP_000129.3
Core matrisome	ECM Glycoproteins	FBN1	fibrillin 1	3603	Familial thoracic aortic aneurysm and aortic dissection	NA	91387	F6U495:H0YN80:H0YND0:P35555	NP_000129.3
Core matrisome	ECM Glycoproteins	FBN1	fibrillin 1	3603	Familial thoracic aortic aneurysm and aortic dissection	NA	91387	F6U495:H0YN80:H0YND0:P35555	NP_000129.3
Core matrisome	ECM Glycoproteins	FBN1	fibrillin 1	3603	Familial thoracic aortic aneurysm and aortic dissection	NA	91387	F6U495:H0YN80:H0YND0:P35555	NP_000129.3
Core matrisome	ECM Glycoproteins	FBN1	fibrillin 1	3603	Familial thoracic aortic aneurysm and aortic dissection	NA	91387	F6U495:H0YN80:H0YND0:P35555	NP_000129.3
Core matrisome	ECM Glycoproteins	FBN1	fibrillin 1	3603	Familial thoracic aortic aneurysm and aortic dissection	NA	91387	F6U495:H0YN80:H0YND0:P35555	NP_000129.3
Core matrisome	ECM Glycoproteins	FBN1	fibrillin 1	3603	Familial thoracic aortic aneurysm and aortic dissection	Genatlas	91387	F6U495:H0YN80:H0YND0:P35555	NP_000129.3
Core matrisome	ECM Glycoproteins	FBN1	fibrillin 1	3603	Familial thoracic aortic aneurysm and aortic dissection	HGNC	91387	F6U495:H0YN80:H0YND0:P35555	NP_000129.3
Core matrisome	ECM Glycoproteins	FBN1	fibrillin 1	3603	Familial thoracic aortic aneurysm and aortic dissection	OMIM	91387	F6U495:H0YN80:H0YND0:P35555	NP_000129.3
Core matrisome	ECM Glycoproteins	FBN1	fibrillin 1	3603	Familial thoracic aortic aneurysm and aortic dissection	Reactome	91387	F6U495:H0YN80:H0YND0:P35555	NP_000129.3
Core matrisome	ECM Glycoproteins	FBN1	fibrillin 1	3603	Familial thoracic aortic aneurysm and aortic dissection	SwissProt	91387	F6U495:H0YN80:H0YND0:P35555	NP_000129.3
Core matrisome	ECM Glycoproteins	FBN1	fibrillin 1	3603	Familial thoracic aortic aneurysm and aortic dissection	NA	91387	F6U495:H0YN80:H0YND0:P35555	NP_000129.3
Core matrisome	ECM Glycoproteins	FBN1	fibrillin 1	3603	Geleophysic dysplasia	Ensembl	2623	F6U495:H0YN80:H0YND0:P35555	NP_000129.3
Core matrisome	ECM Glycoproteins	FBN1	fibrillin 1	3603	Geleophysic dysplasia	NA	2623	F6U495:H0YN80:H0YND0:P35555	NP_000129.3
Core matrisome	ECM Glycoproteins	FBN1	fibrillin 1	3603	Geleophysic dysplasia	NA	2623	F6U495:H0YN80:H0YND0:P35555	NP_000129.3
Core matrisome	ECM Glycoproteins	FBN1	fibrillin 1	3603	Geleophysic dysplasia	NA	2623	F6U495:H0YN80:H0YND0:P35555	NP_000129.3
Core matrisome	ECM Glycoproteins	FBN1	fibrillin 1	3603	Geleophysic dysplasia	NA	2623	F6U495:H0YN80:H0YND0:P35555	NP_000129.3
Core matrisome	ECM Glycoproteins	FBN1	fibrillin 1	3603	Geleophysic dysplasia	NA	2623	F6U495:H0YN80:H0YND0:P35555	NP_000129.3
Core matrisome	ECM Glycoproteins	FBN1	fibrillin 1	3603	Geleophysic dysplasia	Genatlas	2623	F6U495:H0YN80:H0YND0:P35555	NP_000129.3
Core matrisome	ECM Glycoproteins	FBN1	fibrillin 1	3603	Geleophysic dysplasia	HGNC	2623	F6U495:H0YN80:H0YND0:P35555	NP_000129.3
Core matrisome	ECM Glycoproteins	FBN1	fibrillin 1	3603	Geleophysic dysplasia	OMIM	2623	F6U495:H0YN80:H0YND0:P35555	NP_000129.3
Core matrisome	ECM Glycoproteins	FBN1	fibrillin 1	3603	Geleophysic dysplasia	Reactome	2623	F6U495:H0YN80:H0YND0:P35555	NP_000129.3
Core matrisome	ECM Glycoproteins	FBN1	fibrillin 1	3603	Geleophysic dysplasia	SwissProt	2623	F6U495:H0YN80:H0YND0:P35555	NP_000129.3
Core matrisome	ECM Glycoproteins	FBN1	fibrillin 1	3603	Geleophysic dysplasia	NA	2623	F6U495:H0YN80:H0YND0:P35555	NP_000129.3
Core matrisome	ECM Glycoproteins	FBN1	fibrillin 1	3603	Glaucoma-ectopia lentis-microspherophakia-stiff joints-short stature syndrome	Ensembl	2084	F6U495:H0YN80:H0YND0:P35555	NP_000129.3
Core matrisome	ECM Glycoproteins	FBN1	fibrillin 1	3603	Glaucoma-ectopia lentis-microspherophakia-stiff joints-short stature syndrome	NA	2084	F6U495:H0YN80:H0YND0:P35555	NP_000129.3
Core matrisome	ECM Glycoproteins	FBN1	fibrillin 1	3603	Glaucoma-ectopia lentis-microspherophakia-stiff joints-short stature syndrome	NA	2084	F6U495:H0YN80:H0YND0:P35555	NP_000129.3
Core matrisome	ECM Glycoproteins	FBN1	fibrillin 1	3603	Glaucoma-ectopia lentis-microspherophakia-stiff joints-short stature syndrome	NA	2084	F6U495:H0YN80:H0YND0:P35555	NP_000129.3
Core matrisome	ECM Glycoproteins	FBN1	fibrillin 1	3603	Glaucoma-ectopia lentis-microspherophakia-stiff joints-short stature syndrome	NA	2084	F6U495:H0YN80:H0YND0:P35555	NP_000129.3
Core matrisome	ECM Glycoproteins	FBN1	fibrillin 1	3603	Glaucoma-ectopia lentis-microspherophakia-stiff joints-short stature syndrome	NA	2084	F6U495:H0YN80:H0YND0:P35555	NP_000129.3
Core matrisome	ECM Glycoproteins	FBN1	fibrillin 1	3603	Glaucoma-ectopia lentis-microspherophakia-stiff joints-short stature syndrome	Genatlas	2084	F6U495:H0YN80:H0YND0:P35555	NP_000129.3
Core matrisome	ECM Glycoproteins	FBN1	fibrillin 1	3603	Glaucoma-ectopia lentis-microspherophakia-stiff joints-short stature syndrome	HGNC	2084	F6U495:H0YN80:H0YND0:P35555	NP_000129.3
Core matrisome	ECM Glycoproteins	FBN1	fibrillin 1	3603	Glaucoma-ectopia lentis-microspherophakia-stiff joints-short stature syndrome	OMIM	2084	F6U495:H0YN80:H0YND0:P35555	NP_000129.3
Core matrisome	ECM Glycoproteins	FBN1	fibrillin 1	3603	Glaucoma-ectopia lentis-microspherophakia-stiff joints-short stature syndrome	Reactome	2084	F6U495:H0YN80:H0YND0:P35555	NP_000129.3
Core matrisome	ECM Glycoproteins	FBN1	fibrillin 1	3603	Glaucoma-ectopia lentis-microspherophakia-stiff joints-short stature syndrome	SwissProt	2084	F6U495:H0YN80:H0YND0:P35555	NP_000129.3
Core matrisome	ECM Glycoproteins	FBN1	fibrillin 1	3603	Glaucoma-ectopia lentis-microspherophakia-stiff joints-short stature syndrome	NA	2084	F6U495:H0YN80:H0YND0:P35555	NP_000129.3
Core matrisome	ECM Glycoproteins	FBN1	fibrillin 1	3603	Isolated ectopia lentis	Ensembl	1885	F6U495:H0YN80:H0YND0:P35555	NP_000129.3
Core matrisome	ECM Glycoproteins	FBN1	fibrillin 1	3603	Isolated ectopia lentis	NA	1885	F6U495:H0YN80:H0YND0:P35555	NP_000129.3
Core matrisome	ECM Glycoproteins	FBN1	fibrillin 1	3603	Isolated ectopia lentis	NA	1885	F6U495:H0YN80:H0YND0:P35555	NP_000129.3
Core matrisome	ECM Glycoproteins	FBN1	fibrillin 1	3603	Isolated ectopia lentis	NA	1885	F6U495:H0YN80:H0YND0:P35555	NP_000129.3
Core matrisome	ECM Glycoproteins	FBN1	fibrillin 1	3603	Isolated ectopia lentis	NA	1885	F6U495:H0YN80:H0YND0:P35555	NP_000129.3
Core matrisome	ECM Glycoproteins	FBN1	fibrillin 1	3603	Isolated ectopia lentis	NA	1885	F6U495:H0YN80:H0YND0:P35555	NP_000129.3
Core matrisome	ECM Glycoproteins	FBN1	fibrillin 1	3603	Isolated ectopia lentis	Genatlas	1885	F6U495:H0YN80:H0YND0:P35555	NP_000129.3
Core matrisome	ECM Glycoproteins	FBN1	fibrillin 1	3603	Isolated ectopia lentis	HGNC	1885	F6U495:H0YN80:H0YND0:P35555	NP_000129.3
Core matrisome	ECM Glycoproteins	FBN1	fibrillin 1	3603	Isolated ectopia lentis	OMIM	1885	F6U495:H0YN80:H0YND0:P35555	NP_000129.3
Core matrisome	ECM Glycoproteins	FBN1	fibrillin 1	3603	Isolated ectopia lentis	Reactome	1885	F6U495:H0YN80:H0YND0:P35555	NP_000129.3
Core matrisome	ECM Glycoproteins	FBN1	fibrillin 1	3603	Isolated ectopia lentis	SwissProt	1885	F6U495:H0YN80:H0YND0:P35555	NP_000129.3
Core matrisome	ECM Glycoproteins	FBN1	fibrillin 1	3603	Isolated ectopia lentis	NA	1885	F6U495:H0YN80:H0YND0:P35555	NP_000129.3
Core matrisome	ECM Glycoproteins	FBN1	fibrillin 1	3603	Marfan syndrome type 1	Ensembl	284963	F6U495:H0YN80:H0YND0:P35555	NP_000129.3
Core matrisome	ECM Glycoproteins	FBN1	fibrillin 1	3603	Marfan syndrome type 1	NA	284963	F6U495:H0YN80:H0YND0:P35555	NP_000129.3
Core matrisome	ECM Glycoproteins	FBN1	fibrillin 1	3603	Marfan syndrome type 1	NA	284963	F6U495:H0YN80:H0YND0:P35555	NP_000129.3
Core matrisome	ECM Glycoproteins	FBN1	fibrillin 1	3603	Marfan syndrome type 1	NA	284963	F6U495:H0YN80:H0YND0:P35555	NP_000129.3
Core matrisome	ECM Glycoproteins	FBN1	fibrillin 1	3603	Marfan syndrome type 1	NA	284963	F6U495:H0YN80:H0YND0:P35555	NP_000129.3
Core matrisome	ECM Glycoproteins	FBN1	fibrillin 1	3603	Marfan syndrome type 1	NA	284963	F6U495:H0YN80:H0YND0:P35555	NP_000129.3
Core matrisome	ECM Glycoproteins	FBN1	fibrillin 1	3603	Marfan syndrome type 1	Genatlas	284963	F6U495:H0YN80:H0YND0:P35555	NP_000129.3
Core matrisome	ECM Glycoproteins	FBN1	fibrillin 1	3603	Marfan syndrome type 1	HGNC	284963	F6U495:H0YN80:H0YND0:P35555	NP_000129.3
Core matrisome	ECM Glycoproteins	FBN1	fibrillin 1	3603	Marfan syndrome type 1	OMIM	284963	F6U495:H0YN80:H0YND0:P35555	NP_000129.3
Core matrisome	ECM Glycoproteins	FBN1	fibrillin 1	3603	Marfan syndrome type 1	Reactome	284963	F6U495:H0YN80:H0YND0:P35555	NP_000129.3
Core matrisome	ECM Glycoproteins	FBN1	fibrillin 1	3603	Marfan syndrome type 1	SwissProt	284963	F6U495:H0YN80:H0YND0:P35555	NP_000129.3
Core matrisome	ECM Glycoproteins	FBN1	fibrillin 1	3603	Marfan syndrome type 1	NA	284963	F6U495:H0YN80:H0YND0:P35555	NP_000129.3
Core matrisome	ECM Glycoproteins	FBN1	fibrillin 1	3603	Neonatal Marfan syndrome	Ensembl	284979	F6U495:H0YN80:H0YND0:P35555	NP_000129.3
Core matrisome	ECM Glycoproteins	FBN1	fibrillin 1	3603	Neonatal Marfan syndrome	NA	284979	F6U495:H0YN80:H0YND0:P35555	NP_000129.3
Core matrisome	ECM Glycoproteins	FBN1	fibrillin 1	3603	Neonatal Marfan syndrome	NA	284979	F6U495:H0YN80:H0YND0:P35555	NP_000129.3
Core matrisome	ECM Glycoproteins	FBN1	fibrillin 1	3603	Neonatal Marfan syndrome	NA	284979	F6U495:H0YN80:H0YND0:P35555	NP_000129.3
Core matrisome	ECM Glycoproteins	FBN1	fibrillin 1	3603	Neonatal Marfan syndrome	NA	284979	F6U495:H0YN80:H0YND0:P35555	NP_000129.3
Core matrisome	ECM Glycoproteins	FBN1	fibrillin 1	3603	Neonatal Marfan syndrome	NA	284979	F6U495:H0YN80:H0YND0:P35555	NP_000129.3
Core matrisome	ECM Glycoproteins	FBN1	fibrillin 1	3603	Neonatal Marfan syndrome	Genatlas	284979	F6U495:H0YN80:H0YND0:P35555	NP_000129.3
Core matrisome	ECM Glycoproteins	FBN1	fibrillin 1	3603	Neonatal Marfan syndrome	HGNC	284979	F6U495:H0YN80:H0YND0:P35555	NP_000129.3
Core matrisome	ECM Glycoproteins	FBN1	fibrillin 1	3603	Neonatal Marfan syndrome	OMIM	284979	F6U495:H0YN80:H0YND0:P35555	NP_000129.3
Core matrisome	ECM Glycoproteins	FBN1	fibrillin 1	3603	Neonatal Marfan syndrome	Reactome	284979	F6U495:H0YN80:H0YND0:P35555	NP_000129.3
Core matrisome	ECM Glycoproteins	FBN1	fibrillin 1	3603	Neonatal Marfan syndrome	SwissProt	284979	F6U495:H0YN80:H0YND0:P35555	NP_000129.3
Core matrisome	ECM Glycoproteins	FBN1	fibrillin 1	3603	Neonatal Marfan syndrome	NA	284979	F6U495:H0YN80:H0YND0:P35555	NP_000129.3
Core matrisome	ECM Glycoproteins	FBN1	fibrillin 1	3603	Progeroid and marfanoid aspect-lipodystrophy syndrome	Ensembl	300382	F6U495:H0YN80:H0YND0:P35555	NP_000129.3
Core matrisome	ECM Glycoproteins	FBN1	fibrillin 1	3603	Progeroid and marfanoid aspect-lipodystrophy syndrome	NA	300382	F6U495:H0YN80:H0YND0:P35555	NP_000129.3
Core matrisome	ECM Glycoproteins	FBN1	fibrillin 1	3603	Progeroid and marfanoid aspect-lipodystrophy syndrome	NA	300382	F6U495:H0YN80:H0YND0:P35555	NP_000129.3
Core matrisome	ECM Glycoproteins	FBN1	fibrillin 1	3603	Progeroid and marfanoid aspect-lipodystrophy syndrome	NA	300382	F6U495:H0YN80:H0YND0:P35555	NP_000129.3
Core matrisome	ECM Glycoproteins	FBN1	fibrillin 1	3603	Progeroid and marfanoid aspect-lipodystrophy syndrome	NA	300382	F6U495:H0YN80:H0YND0:P35555	NP_000129.3
Core matrisome	ECM Glycoproteins	FBN1	fibrillin 1	3603	Progeroid and marfanoid aspect-lipodystrophy syndrome	NA	300382	F6U495:H0YN80:H0YND0:P35555	NP_000129.3
Core matrisome	ECM Glycoproteins	FBN1	fibrillin 1	3603	Progeroid and marfanoid aspect-lipodystrophy syndrome	Genatlas	300382	F6U495:H0YN80:H0YND0:P35555	NP_000129.3
Core matrisome	ECM Glycoproteins	FBN1	fibrillin 1	3603	Progeroid and marfanoid aspect-lipodystrophy syndrome	HGNC	300382	F6U495:H0YN80:H0YND0:P35555	NP_000129.3
Core matrisome	ECM Glycoproteins	FBN1	fibrillin 1	3603	Progeroid and marfanoid aspect-lipodystrophy syndrome	OMIM	300382	F6U495:H0YN80:H0YND0:P35555	NP_000129.3
Core matrisome	ECM Glycoproteins	FBN1	fibrillin 1	3603	Progeroid and marfanoid aspect-lipodystrophy syndrome	Reactome	300382	F6U495:H0YN80:H0YND0:P35555	NP_000129.3
Core matrisome	ECM Glycoproteins	FBN1	fibrillin 1	3603	Progeroid and marfanoid aspect-lipodystrophy syndrome	SwissProt	300382	F6U495:H0YN80:H0YND0:P35555	NP_000129.3
Core matrisome	ECM Glycoproteins	FBN1	fibrillin 1	3603	Progeroid and marfanoid aspect-lipodystrophy syndrome	NA	300382	F6U495:H0YN80:H0YND0:P35555	NP_000129.3
Core matrisome	ECM Glycoproteins	FBN1	fibrillin 1	3603	Shprintzen-Goldberg syndrome	Ensembl	2462	F6U495:H0YN80:H0YND0:P35555	NP_000129.3
Core matrisome	ECM Glycoproteins	FBN1	fibrillin 1	3603	Shprintzen-Goldberg syndrome	NA	2462	F6U495:H0YN80:H0YND0:P35555	NP_000129.3
Core matrisome	ECM Glycoproteins	FBN1	fibrillin 1	3603	Shprintzen-Goldberg syndrome	NA	2462	F6U495:H0YN80:H0YND0:P35555	NP_000129.3
Core matrisome	ECM Glycoproteins	FBN1	fibrillin 1	3603	Shprintzen-Goldberg syndrome	NA	2462	F6U495:H0YN80:H0YND0:P35555	NP_000129.3
Core matrisome	ECM Glycoproteins	FBN1	fibrillin 1	3603	Shprintzen-Goldberg syndrome	NA	2462	F6U495:H0YN80:H0YND0:P35555	NP_000129.3
Core matrisome	ECM Glycoproteins	FBN1	fibrillin 1	3603	Shprintzen-Goldberg syndrome	NA	2462	F6U495:H0YN80:H0YND0:P35555	NP_000129.3
Core matrisome	ECM Glycoproteins	FBN1	fibrillin 1	3603	Shprintzen-Goldberg syndrome	Genatlas	2462	F6U495:H0YN80:H0YND0:P35555	NP_000129.3
Core matrisome	ECM Glycoproteins	FBN1	fibrillin 1	3603	Shprintzen-Goldberg syndrome	HGNC	2462	F6U495:H0YN80:H0YND0:P35555	NP_000129.3
Core matrisome	ECM Glycoproteins	FBN1	fibrillin 1	3603	Shprintzen-Goldberg syndrome	OMIM	2462	F6U495:H0YN80:H0YND0:P35555	NP_000129.3
Core matrisome	ECM Glycoproteins	FBN1	fibrillin 1	3603	Shprintzen-Goldberg syndrome	Reactome	2462	F6U495:H0YN80:H0YND0:P35555	NP_000129.3
Core matrisome	ECM Glycoproteins	FBN1	fibrillin 1	3603	Shprintzen-Goldberg syndrome	SwissProt	2462	F6U495:H0YN80:H0YND0:P35555	NP_000129.3
Core matrisome	ECM Glycoproteins	FBN1	fibrillin 1	3603	Shprintzen-Goldberg syndrome	NA	2462	F6U495:H0YN80:H0YND0:P35555	NP_000129.3
Core matrisome	ECM Glycoproteins	FBN1	fibrillin 1	3603	Stiff skin syndrome	Ensembl	2833	F6U495:H0YN80:H0YND0:P35555	NP_000129.3
Core matrisome	ECM Glycoproteins	FBN1	fibrillin 1	3603	Stiff skin syndrome	NA	2833	F6U495:H0YN80:H0YND0:P35555	NP_000129.3
Core matrisome	ECM Glycoproteins	FBN1	fibrillin 1	3603	Stiff skin syndrome	NA	2833	F6U495:H0YN80:H0YND0:P35555	NP_000129.3
Core matrisome	ECM Glycoproteins	FBN1	fibrillin 1	3603	Stiff skin syndrome	NA	2833	F6U495:H0YN80:H0YND0:P35555	NP_000129.3
Core matrisome	ECM Glycoproteins	FBN1	fibrillin 1	3603	Stiff skin syndrome	NA	2833	F6U495:H0YN80:H0YND0:P35555	NP_000129.3
Core matrisome	ECM Glycoproteins	FBN1	fibrillin 1	3603	Stiff skin syndrome	NA	2833	F6U495:H0YN80:H0YND0:P35555	NP_000129.3
Core matrisome	ECM Glycoproteins	FBN1	fibrillin 1	3603	Stiff skin syndrome	Genatlas	2833	F6U495:H0YN80:H0YND0:P35555	NP_000129.3
Core matrisome	ECM Glycoproteins	FBN1	fibrillin 1	3603	Stiff skin syndrome	HGNC	2833	F6U495:H0YN80:H0YND0:P35555	NP_000129.3
Core matrisome	ECM Glycoproteins	FBN1	fibrillin 1	3603	Stiff skin syndrome	OMIM	2833	F6U495:H0YN80:H0YND0:P35555	NP_000129.3
Core matrisome	ECM Glycoproteins	FBN1	fibrillin 1	3603	Stiff skin syndrome	Reactome	2833	F6U495:H0YN80:H0YND0:P35555	NP_000129.3
Core matrisome	ECM Glycoproteins	FBN1	fibrillin 1	3603	Stiff skin syndrome	SwissProt	2833	F6U495:H0YN80:H0YND0:P35555	NP_000129.3
Core matrisome	ECM Glycoproteins	FBN1	fibrillin 1	3603	Stiff skin syndrome	NA	2833	F6U495:H0YN80:H0YND0:P35555	NP_000129.3
Core matrisome	ECM Glycoproteins	FBN1	fibrillin 1	3603	Weill-Marchesani syndrome	Ensembl	3449	F6U495:H0YN80:H0YND0:P35555	NP_000129.3
Core matrisome	ECM Glycoproteins	FBN1	fibrillin 1	3603	Weill-Marchesani syndrome	NA	3449	F6U495:H0YN80:H0YND0:P35555	NP_000129.3
Core matrisome	ECM Glycoproteins	FBN1	fibrillin 1	3603	Weill-Marchesani syndrome	NA	3449	F6U495:H0YN80:H0YND0:P35555	NP_000129.3
Core matrisome	ECM Glycoproteins	FBN1	fibrillin 1	3603	Weill-Marchesani syndrome	NA	3449	F6U495:H0YN80:H0YND0:P35555	NP_000129.3
Core matrisome	ECM Glycoproteins	FBN1	fibrillin 1	3603	Weill-Marchesani syndrome	NA	3449	F6U495:H0YN80:H0YND0:P35555	NP_000129.3
Core matrisome	ECM Glycoproteins	FBN1	fibrillin 1	3603	Weill-Marchesani syndrome	NA	3449	F6U495:H0YN80:H0YND0:P35555	NP_000129.3
Core matrisome	ECM Glycoproteins	FBN1	fibrillin 1	3603	Weill-Marchesani syndrome	Genatlas	3449	F6U495:H0YN80:H0YND0:P35555	NP_000129.3
Core matrisome	ECM Glycoproteins	FBN1	fibrillin 1	3603	Weill-Marchesani syndrome	HGNC	3449	F6U495:H0YN80:H0YND0:P35555	NP_000129.3
Core matrisome	ECM Glycoproteins	FBN1	fibrillin 1	3603	Weill-Marchesani syndrome	OMIM	3449	F6U495:H0YN80:H0YND0:P35555	NP_000129.3
Core matrisome	ECM Glycoproteins	FBN1	fibrillin 1	3603	Weill-Marchesani syndrome	Reactome	3449	F6U495:H0YN80:H0YND0:P35555	NP_000129.3
Core matrisome	ECM Glycoproteins	FBN1	fibrillin 1	3603	Weill-Marchesani syndrome	SwissProt	3449	F6U495:H0YN80:H0YND0:P35555	NP_000129.3
Core matrisome	ECM Glycoproteins	FBN1	fibrillin 1	3603	Weill-Marchesani syndrome	NA	3449	F6U495:H0YN80:H0YND0:P35555	NP_000129.3
Core matrisome	ECM Glycoproteins	FBN2	fibrillin 2	3604	Congenital contractural arachnodactyly	NA	115	D6REJ2:D6RJI3:E9PHW4:P35556	NP_001990.2
Core matrisome	ECM Glycoproteins	FBN2	fibrillin 2	3604	Congenital contractural arachnodactyly	NA	115	D6REJ2:D6RJI3:E9PHW4:P35556	NP_001990.2
Core matrisome	ECM Glycoproteins	FBN2	fibrillin 2	3604	Congenital contractural arachnodactyly	Genatlas	115	D6REJ2:D6RJI3:E9PHW4:P35556	NP_001990.2
Core matrisome	ECM Glycoproteins	FBN2	fibrillin 2	3604	Congenital contractural arachnodactyly	HGNC	115	D6REJ2:D6RJI3:E9PHW4:P35556	NP_001990.2
Core matrisome	ECM Glycoproteins	FBN2	fibrillin 2	3604	Congenital contractural arachnodactyly	OMIM	115	D6REJ2:D6RJI3:E9PHW4:P35556	NP_001990.2
Core matrisome	ECM Glycoproteins	FBN2	fibrillin 2	3604	Congenital contractural arachnodactyly	Reactome	115	D6REJ2:D6RJI3:E9PHW4:P35556	NP_001990.2
Core matrisome	ECM Glycoproteins	FBN2	fibrillin 2	3604	Congenital contractural arachnodactyly	SwissProt	115	D6REJ2:D6RJI3:E9PHW4:P35556	NP_001990.2
Core matrisome	ECM Glycoproteins	FBN2	fibrillin 2	3604	Congenital contractural arachnodactyly	NA	115	D6REJ2:D6RJI3:E9PHW4:P35556	NP_001990.2
Core matrisome	ECM Glycoproteins	FBN2	fibrillin 2	3604	Congenital contractural arachnodactyly	Ensembl	115	D6REJ2:D6RJI3:E9PHW4:P35556	NP_001990.2
Core matrisome	ECM Glycoproteins	FGA	fibrinogen alpha chain	3661	AFib amyloidosis	NA	93562	P02671	NP_000499.1:NP_068657.1
Core matrisome	ECM Glycoproteins	FGA	fibrinogen alpha chain	3661	AFib amyloidosis	Genatlas	93562	P02671	NP_000499.1:NP_068657.1
Core matrisome	ECM Glycoproteins	FGA	fibrinogen alpha chain	3661	AFib amyloidosis	HGNC	93562	P02671	NP_000499.1:NP_068657.1
Core matrisome	ECM Glycoproteins	FGA	fibrinogen alpha chain	3661	AFib amyloidosis	OMIM	93562	P02671	NP_000499.1:NP_068657.1
Core matrisome	ECM Glycoproteins	FGA	fibrinogen alpha chain	3661	AFib amyloidosis	Reactome	93562	P02671	NP_000499.1:NP_068657.1
Core matrisome	ECM Glycoproteins	FGA	fibrinogen alpha chain	3661	AFib amyloidosis	SwissProt	93562	P02671	NP_000499.1:NP_068657.1
Core matrisome	ECM Glycoproteins	FGA	fibrinogen alpha chain	3661	AFib amyloidosis	NA	93562	P02671	NP_000499.1:NP_068657.1
Core matrisome	ECM Glycoproteins	FGA	fibrinogen alpha chain	3661	AFib amyloidosis	Ensembl	93562	P02671	NP_000499.1:NP_068657.1
Core matrisome	ECM Glycoproteins	FGA	fibrinogen alpha chain	3661	Familial afibrinogenemia	Ensembl	98880	P02671	NP_000499.1:NP_068657.1
Core matrisome	ECM Glycoproteins	FGA	fibrinogen alpha chain	3661	Familial afibrinogenemia	NA	98880	P02671	NP_000499.1:NP_068657.1
Core matrisome	ECM Glycoproteins	FGA	fibrinogen alpha chain	3661	Familial afibrinogenemia	Genatlas	98880	P02671	NP_000499.1:NP_068657.1
Core matrisome	ECM Glycoproteins	FGA	fibrinogen alpha chain	3661	Familial afibrinogenemia	HGNC	98880	P02671	NP_000499.1:NP_068657.1
Core matrisome	ECM Glycoproteins	FGA	fibrinogen alpha chain	3661	Familial afibrinogenemia	OMIM	98880	P02671	NP_000499.1:NP_068657.1
Core matrisome	ECM Glycoproteins	FGA	fibrinogen alpha chain	3661	Familial afibrinogenemia	Reactome	98880	P02671	NP_000499.1:NP_068657.1
Core matrisome	ECM Glycoproteins	FGA	fibrinogen alpha chain	3661	Familial afibrinogenemia	SwissProt	98880	P02671	NP_000499.1:NP_068657.1
Core matrisome	ECM Glycoproteins	FGA	fibrinogen alpha chain	3661	Familial afibrinogenemia	NA	98880	P02671	NP_000499.1:NP_068657.1
Core matrisome	ECM Glycoproteins	FGA	fibrinogen alpha chain	3661	Familial dysfibrinogenemia	Ensembl	98881	P02671	NP_000499.1:NP_068657.1
Core matrisome	ECM Glycoproteins	FGA	fibrinogen alpha chain	3661	Familial dysfibrinogenemia	NA	98881	P02671	NP_000499.1:NP_068657.1
Core matrisome	ECM Glycoproteins	FGA	fibrinogen alpha chain	3661	Familial dysfibrinogenemia	Genatlas	98881	P02671	NP_000499.1:NP_068657.1
Core matrisome	ECM Glycoproteins	FGA	fibrinogen alpha chain	3661	Familial dysfibrinogenemia	HGNC	98881	P02671	NP_000499.1:NP_068657.1
Core matrisome	ECM Glycoproteins	FGA	fibrinogen alpha chain	3661	Familial dysfibrinogenemia	OMIM	98881	P02671	NP_000499.1:NP_068657.1
Core matrisome	ECM Glycoproteins	FGA	fibrinogen alpha chain	3661	Familial dysfibrinogenemia	Reactome	98881	P02671	NP_000499.1:NP_068657.1
Core matrisome	ECM Glycoproteins	FGA	fibrinogen alpha chain	3661	Familial dysfibrinogenemia	SwissProt	98881	P02671	NP_000499.1:NP_068657.1
Core matrisome	ECM Glycoproteins	FGA	fibrinogen alpha chain	3661	Familial dysfibrinogenemia	NA	98881	P02671	NP_000499.1:NP_068657.1
Core matrisome	ECM Glycoproteins	FGA	fibrinogen alpha chain	3661	Familial hypodysfibrinogenemia	Ensembl	248408	P02671	NP_000499.1:NP_068657.1
Core matrisome	ECM Glycoproteins	FGA	fibrinogen alpha chain	3661	Familial hypodysfibrinogenemia	NA	248408	P02671	NP_000499.1:NP_068657.1
Core matrisome	ECM Glycoproteins	FGA	fibrinogen alpha chain	3661	Familial hypodysfibrinogenemia	Genatlas	248408	P02671	NP_000499.1:NP_068657.1
Core matrisome	ECM Glycoproteins	FGA	fibrinogen alpha chain	3661	Familial hypodysfibrinogenemia	HGNC	248408	P02671	NP_000499.1:NP_068657.1
Core matrisome	ECM Glycoproteins	FGA	fibrinogen alpha chain	3661	Familial hypodysfibrinogenemia	OMIM	248408	P02671	NP_000499.1:NP_068657.1
Core matrisome	ECM Glycoproteins	FGA	fibrinogen alpha chain	3661	Familial hypodysfibrinogenemia	Reactome	248408	P02671	NP_000499.1:NP_068657.1
Core matrisome	ECM Glycoproteins	FGA	fibrinogen alpha chain	3661	Familial hypodysfibrinogenemia	SwissProt	248408	P02671	NP_000499.1:NP_068657.1
Core matrisome	ECM Glycoproteins	FGA	fibrinogen alpha chain	3661	Familial hypodysfibrinogenemia	NA	248408	P02671	NP_000499.1:NP_068657.1
Core matrisome	ECM Glycoproteins	FGA	fibrinogen alpha chain	3661	Familial hypofibrinogenemia	Ensembl	101041	P02671	NP_000499.1:NP_068657.1
Core matrisome	ECM Glycoproteins	FGA	fibrinogen alpha chain	3661	Familial hypofibrinogenemia	NA	101041	P02671	NP_000499.1:NP_068657.1
Core matrisome	ECM Glycoproteins	FGA	fibrinogen alpha chain	3661	Familial hypofibrinogenemia	Genatlas	101041	P02671	NP_000499.1:NP_068657.1
Core matrisome	ECM Glycoproteins	FGA	fibrinogen alpha chain	3661	Familial hypofibrinogenemia	HGNC	101041	P02671	NP_000499.1:NP_068657.1
Core matrisome	ECM Glycoproteins	FGA	fibrinogen alpha chain	3661	Familial hypofibrinogenemia	OMIM	101041	P02671	NP_000499.1:NP_068657.1
Core matrisome	ECM Glycoproteins	FGA	fibrinogen alpha chain	3661	Familial hypofibrinogenemia	Reactome	101041	P02671	NP_000499.1:NP_068657.1
Core matrisome	ECM Glycoproteins	FGA	fibrinogen alpha chain	3661	Familial hypofibrinogenemia	SwissProt	101041	P02671	NP_000499.1:NP_068657.1
Core matrisome	ECM Glycoproteins	FGA	fibrinogen alpha chain	3661	Familial hypofibrinogenemia	NA	101041	P02671	NP_000499.1:NP_068657.1
Core matrisome	ECM Glycoproteins	FGB	fibrinogen beta chain	3662	Familial afibrinogenemia	Ensembl	98880	D6REL8:F8W6P4:P02675	NP_001171670.1:NP_005132.2
Core matrisome	ECM Glycoproteins	FGB	fibrinogen beta chain	3662	Familial afibrinogenemia	NA	98880	D6REL8:F8W6P4:P02675	NP_001171670.1:NP_005132.2
Core matrisome	ECM Glycoproteins	FGB	fibrinogen beta chain	3662	Familial afibrinogenemia	Genatlas	98880	D6REL8:F8W6P4:P02675	NP_001171670.1:NP_005132.2
Core matrisome	ECM Glycoproteins	FGB	fibrinogen beta chain	3662	Familial afibrinogenemia	HGNC	98880	D6REL8:F8W6P4:P02675	NP_001171670.1:NP_005132.2
Core matrisome	ECM Glycoproteins	FGB	fibrinogen beta chain	3662	Familial afibrinogenemia	OMIM	98880	D6REL8:F8W6P4:P02675	NP_001171670.1:NP_005132.2
Core matrisome	ECM Glycoproteins	FGB	fibrinogen beta chain	3662	Familial afibrinogenemia	Reactome	98880	D6REL8:F8W6P4:P02675	NP_001171670.1:NP_005132.2
Core matrisome	ECM Glycoproteins	FGB	fibrinogen beta chain	3662	Familial afibrinogenemia	SwissProt	98880	D6REL8:F8W6P4:P02675	NP_001171670.1:NP_005132.2
Core matrisome	ECM Glycoproteins	FGB	fibrinogen beta chain	3662	Familial afibrinogenemia	NA	98880	D6REL8:F8W6P4:P02675	NP_001171670.1:NP_005132.2
Core matrisome	ECM Glycoproteins	FGB	fibrinogen beta chain	3662	Familial dysfibrinogenemia	Ensembl	98881	D6REL8:F8W6P4:P02675	NP_001171670.1:NP_005132.2
Core matrisome	ECM Glycoproteins	FGB	fibrinogen beta chain	3662	Familial dysfibrinogenemia	NA	98881	D6REL8:F8W6P4:P02675	NP_001171670.1:NP_005132.2
Core matrisome	ECM Glycoproteins	FGB	fibrinogen beta chain	3662	Familial dysfibrinogenemia	Genatlas	98881	D6REL8:F8W6P4:P02675	NP_001171670.1:NP_005132.2
Core matrisome	ECM Glycoproteins	FGB	fibrinogen beta chain	3662	Familial dysfibrinogenemia	HGNC	98881	D6REL8:F8W6P4:P02675	NP_001171670.1:NP_005132.2
Core matrisome	ECM Glycoproteins	FGB	fibrinogen beta chain	3662	Familial dysfibrinogenemia	OMIM	98881	D6REL8:F8W6P4:P02675	NP_001171670.1:NP_005132.2
Core matrisome	ECM Glycoproteins	FGB	fibrinogen beta chain	3662	Familial dysfibrinogenemia	Reactome	98881	D6REL8:F8W6P4:P02675	NP_001171670.1:NP_005132.2
Core matrisome	ECM Glycoproteins	FGB	fibrinogen beta chain	3662	Familial dysfibrinogenemia	SwissProt	98881	D6REL8:F8W6P4:P02675	NP_001171670.1:NP_005132.2
Core matrisome	ECM Glycoproteins	FGB	fibrinogen beta chain	3662	Familial dysfibrinogenemia	NA	98881	D6REL8:F8W6P4:P02675	NP_001171670.1:NP_005132.2
Core matrisome	ECM Glycoproteins	FGB	fibrinogen beta chain	3662	Familial hypodysfibrinogenemia	Ensembl	248408	D6REL8:F8W6P4:P02675	NP_001171670.1:NP_005132.2
Core matrisome	ECM Glycoproteins	FGB	fibrinogen beta chain	3662	Familial hypodysfibrinogenemia	NA	248408	D6REL8:F8W6P4:P02675	NP_001171670.1:NP_005132.2
Core matrisome	ECM Glycoproteins	FGB	fibrinogen beta chain	3662	Familial hypodysfibrinogenemia	Genatlas	248408	D6REL8:F8W6P4:P02675	NP_001171670.1:NP_005132.2
Core matrisome	ECM Glycoproteins	FGB	fibrinogen beta chain	3662	Familial hypodysfibrinogenemia	HGNC	248408	D6REL8:F8W6P4:P02675	NP_001171670.1:NP_005132.2
Core matrisome	ECM Glycoproteins	FGB	fibrinogen beta chain	3662	Familial hypodysfibrinogenemia	OMIM	248408	D6REL8:F8W6P4:P02675	NP_001171670.1:NP_005132.2
Core matrisome	ECM Glycoproteins	FGB	fibrinogen beta chain	3662	Familial hypodysfibrinogenemia	Reactome	248408	D6REL8:F8W6P4:P02675	NP_001171670.1:NP_005132.2
Core matrisome	ECM Glycoproteins	FGB	fibrinogen beta chain	3662	Familial hypodysfibrinogenemia	SwissProt	248408	D6REL8:F8W6P4:P02675	NP_001171670.1:NP_005132.2
Core matrisome	ECM Glycoproteins	FGB	fibrinogen beta chain	3662	Familial hypodysfibrinogenemia	NA	248408	D6REL8:F8W6P4:P02675	NP_001171670.1:NP_005132.2
Core matrisome	ECM Glycoproteins	FGB	fibrinogen beta chain	3662	Familial hypofibrinogenemia	Ensembl	101041	D6REL8:F8W6P4:P02675	NP_001171670.1:NP_005132.2
Core matrisome	ECM Glycoproteins	FGB	fibrinogen beta chain	3662	Familial hypofibrinogenemia	NA	101041	D6REL8:F8W6P4:P02675	NP_001171670.1:NP_005132.2
Core matrisome	ECM Glycoproteins	FGB	fibrinogen beta chain	3662	Familial hypofibrinogenemia	Genatlas	101041	D6REL8:F8W6P4:P02675	NP_001171670.1:NP_005132.2
Core matrisome	ECM Glycoproteins	FGB	fibrinogen beta chain	3662	Familial hypofibrinogenemia	HGNC	101041	D6REL8:F8W6P4:P02675	NP_001171670.1:NP_005132.2
Core matrisome	ECM Glycoproteins	FGB	fibrinogen beta chain	3662	Familial hypofibrinogenemia	OMIM	101041	D6REL8:F8W6P4:P02675	NP_001171670.1:NP_005132.2
Core matrisome	ECM Glycoproteins	FGB	fibrinogen beta chain	3662	Familial hypofibrinogenemia	Reactome	101041	D6REL8:F8W6P4:P02675	NP_001171670.1:NP_005132.2
Core matrisome	ECM Glycoproteins	FGB	fibrinogen beta chain	3662	Familial hypofibrinogenemia	SwissProt	101041	D6REL8:F8W6P4:P02675	NP_001171670.1:NP_005132.2
Core matrisome	ECM Glycoproteins	FGB	fibrinogen beta chain	3662	Familial hypofibrinogenemia	NA	101041	D6REL8:F8W6P4:P02675	NP_001171670.1:NP_005132.2
Core matrisome	ECM Glycoproteins	FGG	fibrinogen gamma chain	3694	Familial afibrinogenemia	Ensembl	98880	C9JC84:C9JEU5:C9JPQ9:C9JU00:P02679	NP_000500.2:NP_068656.2
Core matrisome	ECM Glycoproteins	FGG	fibrinogen gamma chain	3694	Familial afibrinogenemia	NA	98880	C9JC84:C9JEU5:C9JPQ9:C9JU00:P02679	NP_000500.2:NP_068656.2
Core matrisome	ECM Glycoproteins	FGG	fibrinogen gamma chain	3694	Familial afibrinogenemia	Genatlas	98880	C9JC84:C9JEU5:C9JPQ9:C9JU00:P02679	NP_000500.2:NP_068656.2
Core matrisome	ECM Glycoproteins	FGG	fibrinogen gamma chain	3694	Familial afibrinogenemia	HGNC	98880	C9JC84:C9JEU5:C9JPQ9:C9JU00:P02679	NP_000500.2:NP_068656.2
Core matrisome	ECM Glycoproteins	FGG	fibrinogen gamma chain	3694	Familial afibrinogenemia	OMIM	98880	C9JC84:C9JEU5:C9JPQ9:C9JU00:P02679	NP_000500.2:NP_068656.2
Core matrisome	ECM Glycoproteins	FGG	fibrinogen gamma chain	3694	Familial afibrinogenemia	Reactome	98880	C9JC84:C9JEU5:C9JPQ9:C9JU00:P02679	NP_000500.2:NP_068656.2
Core matrisome	ECM Glycoproteins	FGG	fibrinogen gamma chain	3694	Familial afibrinogenemia	SwissProt	98880	C9JC84:C9JEU5:C9JPQ9:C9JU00:P02679	NP_000500.2:NP_068656.2
Core matrisome	ECM Glycoproteins	FGG	fibrinogen gamma chain	3694	Familial afibrinogenemia	NA	98880	C9JC84:C9JEU5:C9JPQ9:C9JU00:P02679	NP_000500.2:NP_068656.2
Core matrisome	ECM Glycoproteins	FGG	fibrinogen gamma chain	3694	Familial dysfibrinogenemia	Ensembl	98881	C9JC84:C9JEU5:C9JPQ9:C9JU00:P02679	NP_000500.2:NP_068656.2
Core matrisome	ECM Glycoproteins	FGG	fibrinogen gamma chain	3694	Familial dysfibrinogenemia	NA	98881	C9JC84:C9JEU5:C9JPQ9:C9JU00:P02679	NP_000500.2:NP_068656.2
Core matrisome	ECM Glycoproteins	FGG	fibrinogen gamma chain	3694	Familial dysfibrinogenemia	Genatlas	98881	C9JC84:C9JEU5:C9JPQ9:C9JU00:P02679	NP_000500.2:NP_068656.2
Core matrisome	ECM Glycoproteins	FGG	fibrinogen gamma chain	3694	Familial dysfibrinogenemia	HGNC	98881	C9JC84:C9JEU5:C9JPQ9:C9JU00:P02679	NP_000500.2:NP_068656.2
Core matrisome	ECM Glycoproteins	FGG	fibrinogen gamma chain	3694	Familial dysfibrinogenemia	OMIM	98881	C9JC84:C9JEU5:C9JPQ9:C9JU00:P02679	NP_000500.2:NP_068656.2
Core matrisome	ECM Glycoproteins	FGG	fibrinogen gamma chain	3694	Familial dysfibrinogenemia	Reactome	98881	C9JC84:C9JEU5:C9JPQ9:C9JU00:P02679	NP_000500.2:NP_068656.2
Core matrisome	ECM Glycoproteins	FGG	fibrinogen gamma chain	3694	Familial dysfibrinogenemia	SwissProt	98881	C9JC84:C9JEU5:C9JPQ9:C9JU00:P02679	NP_000500.2:NP_068656.2
Core matrisome	ECM Glycoproteins	FGG	fibrinogen gamma chain	3694	Familial dysfibrinogenemia	NA	98881	C9JC84:C9JEU5:C9JPQ9:C9JU00:P02679	NP_000500.2:NP_068656.2
Core matrisome	ECM Glycoproteins	FGG	fibrinogen gamma chain	3694	Familial hypodysfibrinogenemia	Ensembl	248408	C9JC84:C9JEU5:C9JPQ9:C9JU00:P02679	NP_000500.2:NP_068656.2
Core matrisome	ECM Glycoproteins	FGG	fibrinogen gamma chain	3694	Familial hypodysfibrinogenemia	NA	248408	C9JC84:C9JEU5:C9JPQ9:C9JU00:P02679	NP_000500.2:NP_068656.2
Core matrisome	ECM Glycoproteins	FGG	fibrinogen gamma chain	3694	Familial hypodysfibrinogenemia	Genatlas	248408	C9JC84:C9JEU5:C9JPQ9:C9JU00:P02679	NP_000500.2:NP_068656.2
Core matrisome	ECM Glycoproteins	FGG	fibrinogen gamma chain	3694	Familial hypodysfibrinogenemia	HGNC	248408	C9JC84:C9JEU5:C9JPQ9:C9JU00:P02679	NP_000500.2:NP_068656.2
Core matrisome	ECM Glycoproteins	FGG	fibrinogen gamma chain	3694	Familial hypodysfibrinogenemia	OMIM	248408	C9JC84:C9JEU5:C9JPQ9:C9JU00:P02679	NP_000500.2:NP_068656.2
Core matrisome	ECM Glycoproteins	FGG	fibrinogen gamma chain	3694	Familial hypodysfibrinogenemia	Reactome	248408	C9JC84:C9JEU5:C9JPQ9:C9JU00:P02679	NP_000500.2:NP_068656.2
Core matrisome	ECM Glycoproteins	FGG	fibrinogen gamma chain	3694	Familial hypodysfibrinogenemia	SwissProt	248408	C9JC84:C9JEU5:C9JPQ9:C9JU00:P02679	NP_000500.2:NP_068656.2
Core matrisome	ECM Glycoproteins	FGG	fibrinogen gamma chain	3694	Familial hypodysfibrinogenemia	NA	248408	C9JC84:C9JEU5:C9JPQ9:C9JU00:P02679	NP_000500.2:NP_068656.2
Core matrisome	ECM Glycoproteins	FGG	fibrinogen gamma chain	3694	Familial hypofibrinogenemia	Ensembl	101041	C9JC84:C9JEU5:C9JPQ9:C9JU00:P02679	NP_000500.2:NP_068656.2
Core matrisome	ECM Glycoproteins	FGG	fibrinogen gamma chain	3694	Familial hypofibrinogenemia	NA	101041	C9JC84:C9JEU5:C9JPQ9:C9JU00:P02679	NP_000500.2:NP_068656.2
Core matrisome	ECM Glycoproteins	FGG	fibrinogen gamma chain	3694	Familial hypofibrinogenemia	Genatlas	101041	C9JC84:C9JEU5:C9JPQ9:C9JU00:P02679	NP_000500.2:NP_068656.2
Core matrisome	ECM Glycoproteins	FGG	fibrinogen gamma chain	3694	Familial hypofibrinogenemia	HGNC	101041	C9JC84:C9JEU5:C9JPQ9:C9JU00:P02679	NP_000500.2:NP_068656.2
Core matrisome	ECM Glycoproteins	FGG	fibrinogen gamma chain	3694	Familial hypofibrinogenemia	OMIM	101041	C9JC84:C9JEU5:C9JPQ9:C9JU00:P02679	NP_000500.2:NP_068656.2
Core matrisome	ECM Glycoproteins	FGG	fibrinogen gamma chain	3694	Familial hypofibrinogenemia	Reactome	101041	C9JC84:C9JEU5:C9JPQ9:C9JU00:P02679	NP_000500.2:NP_068656.2
Core matrisome	ECM Glycoproteins	FGG	fibrinogen gamma chain	3694	Familial hypofibrinogenemia	SwissProt	101041	C9JC84:C9JEU5:C9JPQ9:C9JU00:P02679	NP_000500.2:NP_068656.2
Core matrisome	ECM Glycoproteins	FGG	fibrinogen gamma chain	3694	Familial hypofibrinogenemia	NA	101041	C9JC84:C9JEU5:C9JPQ9:C9JU00:P02679	NP_000500.2:NP_068656.2
Core matrisome	ECM Glycoproteins	FN1	fibronectin 1	3778	Fibronectin glomerulopathy	NA	84090	F8W7G7:H0Y4K8:H0Y7Z1:P02751	NP_002017.1:NP_473375.2:NP_997639.1:NP_997641.1:NP_997643.1:NP_997647.1:XP_005246457.1:XP_005246463.1:XP_005246470.1:XP_005246472.1:XP_005246474.1
Core matrisome	ECM Glycoproteins	FN1	fibronectin 1	3778	Fibronectin glomerulopathy	NA	84090	F8W7G7:H0Y4K8:H0Y7Z1:P02751	NP_002017.1:NP_473375.2:NP_997639.1:NP_997641.1:NP_997643.1:NP_997647.1:XP_005246457.1:XP_005246463.1:XP_005246470.1:XP_005246472.1:XP_005246474.1
Core matrisome	ECM Glycoproteins	FN1	fibronectin 1	3778	Fibronectin glomerulopathy	NA	84090	F8W7G7:H0Y4K8:H0Y7Z1:P02751	NP_002017.1:NP_473375.2:NP_997639.1:NP_997641.1:NP_997643.1:NP_997647.1:XP_005246457.1:XP_005246463.1:XP_005246470.1:XP_005246472.1:XP_005246474.1
Core matrisome	ECM Glycoproteins	FN1	fibronectin 1	3778	Fibronectin glomerulopathy	NA	84090	F8W7G7:H0Y4K8:H0Y7Z1:P02751	NP_002017.1:NP_473375.2:NP_997639.1:NP_997641.1:NP_997643.1:NP_997647.1:XP_005246457.1:XP_005246463.1:XP_005246470.1:XP_005246472.1:XP_005246474.1
Core matrisome	ECM Glycoproteins	FN1	fibronectin 1	3778	Fibronectin glomerulopathy	NA	84090	F8W7G7:H0Y4K8:H0Y7Z1:P02751	NP_002017.1:NP_473375.2:NP_997639.1:NP_997641.1:NP_997643.1:NP_997647.1:XP_005246457.1:XP_005246463.1:XP_005246470.1:XP_005246472.1:XP_005246474.1
Core matrisome	ECM Glycoproteins	FN1	fibronectin 1	3778	Fibronectin glomerulopathy	NA	84090	F8W7G7:H0Y4K8:H0Y7Z1:P02751	NP_002017.1:NP_473375.2:NP_997639.1:NP_997641.1:NP_997643.1:NP_997647.1:XP_005246457.1:XP_005246463.1:XP_005246470.1:XP_005246472.1:XP_005246474.1
Core matrisome	ECM Glycoproteins	FN1	fibronectin 1	3778	Fibronectin glomerulopathy	NA	84090	F8W7G7:H0Y4K8:H0Y7Z1:P02751	NP_002017.1:NP_473375.2:NP_997639.1:NP_997641.1:NP_997643.1:NP_997647.1:XP_005246457.1:XP_005246463.1:XP_005246470.1:XP_005246472.1:XP_005246474.1
Core matrisome	ECM Glycoproteins	FN1	fibronectin 1	3778	Fibronectin glomerulopathy	Genatlas	84090	F8W7G7:H0Y4K8:H0Y7Z1:P02751	NP_002017.1:NP_473375.2:NP_997639.1:NP_997641.1:NP_997643.1:NP_997647.1:XP_005246457.1:XP_005246463.1:XP_005246470.1:XP_005246472.1:XP_005246474.1
Core matrisome	ECM Glycoproteins	FN1	fibronectin 1	3778	Fibronectin glomerulopathy	HGNC	84090	F8W7G7:H0Y4K8:H0Y7Z1:P02751	NP_002017.1:NP_473375.2:NP_997639.1:NP_997641.1:NP_997643.1:NP_997647.1:XP_005246457.1:XP_005246463.1:XP_005246470.1:XP_005246472.1:XP_005246474.1
Core matrisome	ECM Glycoproteins	FN1	fibronectin 1	3778	Fibronectin glomerulopathy	OMIM	84090	F8W7G7:H0Y4K8:H0Y7Z1:P02751	NP_002017.1:NP_473375.2:NP_997639.1:NP_997641.1:NP_997643.1:NP_997647.1:XP_005246457.1:XP_005246463.1:XP_005246470.1:XP_005246472.1:XP_005246474.1
Core matrisome	ECM Glycoproteins	FN1	fibronectin 1	3778	Fibronectin glomerulopathy	Reactome	84090	F8W7G7:H0Y4K8:H0Y7Z1:P02751	NP_002017.1:NP_473375.2:NP_997639.1:NP_997641.1:NP_997643.1:NP_997647.1:XP_005246457.1:XP_005246463.1:XP_005246470.1:XP_005246472.1:XP_005246474.1
Core matrisome	ECM Glycoproteins	FN1	fibronectin 1	3778	Fibronectin glomerulopathy	SwissProt	84090	F8W7G7:H0Y4K8:H0Y7Z1:P02751	NP_002017.1:NP_473375.2:NP_997639.1:NP_997641.1:NP_997643.1:NP_997647.1:XP_005246457.1:XP_005246463.1:XP_005246470.1:XP_005246472.1:XP_005246474.1
Core matrisome	ECM Glycoproteins	FN1	fibronectin 1	3778	Fibronectin glomerulopathy	NA	84090	F8W7G7:H0Y4K8:H0Y7Z1:P02751	NP_002017.1:NP_473375.2:NP_997639.1:NP_997641.1:NP_997643.1:NP_997647.1:XP_005246457.1:XP_005246463.1:XP_005246470.1:XP_005246472.1:XP_005246474.1
Core matrisome	ECM Glycoproteins	FN1	fibronectin 1	3778	Fibronectin glomerulopathy	Ensembl	84090	F8W7G7:H0Y4K8:H0Y7Z1:P02751	NP_002017.1:NP_473375.2:NP_997639.1:NP_997641.1:NP_997643.1:NP_997647.1:XP_005246457.1:XP_005246463.1:XP_005246470.1:XP_005246472.1:XP_005246474.1
Core matrisome	ECM Glycoproteins	FN1	fibronectin 1	3778	Spondylometaphyseal dysplasia, 'corner fracture' type	Ensembl	93315	F8W7G7:H0Y4K8:H0Y7Z1:P02751	NP_002017.1:NP_473375.2:NP_997639.1:NP_997641.1:NP_997643.1:NP_997647.1:XP_005246457.1:XP_005246463.1:XP_005246470.1:XP_005246472.1:XP_005246474.1
Core matrisome	ECM Glycoproteins	FN1	fibronectin 1	3778	Spondylometaphyseal dysplasia, 'corner fracture' type	NA	93315	F8W7G7:H0Y4K8:H0Y7Z1:P02751	NP_002017.1:NP_473375.2:NP_997639.1:NP_997641.1:NP_997643.1:NP_997647.1:XP_005246457.1:XP_005246463.1:XP_005246470.1:XP_005246472.1:XP_005246474.1
Core matrisome	ECM Glycoproteins	FN1	fibronectin 1	3778	Spondylometaphyseal dysplasia, 'corner fracture' type	NA	93315	F8W7G7:H0Y4K8:H0Y7Z1:P02751	NP_002017.1:NP_473375.2:NP_997639.1:NP_997641.1:NP_997643.1:NP_997647.1:XP_005246457.1:XP_005246463.1:XP_005246470.1:XP_005246472.1:XP_005246474.1
Core matrisome	ECM Glycoproteins	FN1	fibronectin 1	3778	Spondylometaphyseal dysplasia, 'corner fracture' type	NA	93315	F8W7G7:H0Y4K8:H0Y7Z1:P02751	NP_002017.1:NP_473375.2:NP_997639.1:NP_997641.1:NP_997643.1:NP_997647.1:XP_005246457.1:XP_005246463.1:XP_005246470.1:XP_005246472.1:XP_005246474.1
Core matrisome	ECM Glycoproteins	FN1	fibronectin 1	3778	Spondylometaphyseal dysplasia, 'corner fracture' type	NA	93315	F8W7G7:H0Y4K8:H0Y7Z1:P02751	NP_002017.1:NP_473375.2:NP_997639.1:NP_997641.1:NP_997643.1:NP_997647.1:XP_005246457.1:XP_005246463.1:XP_005246470.1:XP_005246472.1:XP_005246474.1
Core matrisome	ECM Glycoproteins	FN1	fibronectin 1	3778	Spondylometaphyseal dysplasia, 'corner fracture' type	NA	93315	F8W7G7:H0Y4K8:H0Y7Z1:P02751	NP_002017.1:NP_473375.2:NP_997639.1:NP_997641.1:NP_997643.1:NP_997647.1:XP_005246457.1:XP_005246463.1:XP_005246470.1:XP_005246472.1:XP_005246474.1
Core matrisome	ECM Glycoproteins	FN1	fibronectin 1	3778	Spondylometaphyseal dysplasia, 'corner fracture' type	NA	93315	F8W7G7:H0Y4K8:H0Y7Z1:P02751	NP_002017.1:NP_473375.2:NP_997639.1:NP_997641.1:NP_997643.1:NP_997647.1:XP_005246457.1:XP_005246463.1:XP_005246470.1:XP_005246472.1:XP_005246474.1
Core matrisome	ECM Glycoproteins	FN1	fibronectin 1	3778	Spondylometaphyseal dysplasia, 'corner fracture' type	NA	93315	F8W7G7:H0Y4K8:H0Y7Z1:P02751	NP_002017.1:NP_473375.2:NP_997639.1:NP_997641.1:NP_997643.1:NP_997647.1:XP_005246457.1:XP_005246463.1:XP_005246470.1:XP_005246472.1:XP_005246474.1
Core matrisome	ECM Glycoproteins	FN1	fibronectin 1	3778	Spondylometaphyseal dysplasia, 'corner fracture' type	Genatlas	93315	F8W7G7:H0Y4K8:H0Y7Z1:P02751	NP_002017.1:NP_473375.2:NP_997639.1:NP_997641.1:NP_997643.1:NP_997647.1:XP_005246457.1:XP_005246463.1:XP_005246470.1:XP_005246472.1:XP_005246474.1
Core matrisome	ECM Glycoproteins	FN1	fibronectin 1	3778	Spondylometaphyseal dysplasia, 'corner fracture' type	HGNC	93315	F8W7G7:H0Y4K8:H0Y7Z1:P02751	NP_002017.1:NP_473375.2:NP_997639.1:NP_997641.1:NP_997643.1:NP_997647.1:XP_005246457.1:XP_005246463.1:XP_005246470.1:XP_005246472.1:XP_005246474.1
Core matrisome	ECM Glycoproteins	FN1	fibronectin 1	3778	Spondylometaphyseal dysplasia, 'corner fracture' type	OMIM	93315	F8W7G7:H0Y4K8:H0Y7Z1:P02751	NP_002017.1:NP_473375.2:NP_997639.1:NP_997641.1:NP_997643.1:NP_997647.1:XP_005246457.1:XP_005246463.1:XP_005246470.1:XP_005246472.1:XP_005246474.1
Core matrisome	ECM Glycoproteins	FN1	fibronectin 1	3778	Spondylometaphyseal dysplasia, 'corner fracture' type	Reactome	93315	F8W7G7:H0Y4K8:H0Y7Z1:P02751	NP_002017.1:NP_473375.2:NP_997639.1:NP_997641.1:NP_997643.1:NP_997647.1:XP_005246457.1:XP_005246463.1:XP_005246470.1:XP_005246472.1:XP_005246474.1
Core matrisome	ECM Glycoproteins	FN1	fibronectin 1	3778	Spondylometaphyseal dysplasia, 'corner fracture' type	SwissProt	93315	F8W7G7:H0Y4K8:H0Y7Z1:P02751	NP_002017.1:NP_473375.2:NP_997639.1:NP_997641.1:NP_997643.1:NP_997647.1:XP_005246457.1:XP_005246463.1:XP_005246470.1:XP_005246472.1:XP_005246474.1
Core matrisome	ECM Glycoproteins	FN1	fibronectin 1	3778	Spondylometaphyseal dysplasia, 'corner fracture' type	NA	93315	F8W7G7:H0Y4K8:H0Y7Z1:P02751	NP_002017.1:NP_473375.2:NP_997639.1:NP_997641.1:NP_997643.1:NP_997647.1:XP_005246457.1:XP_005246463.1:XP_005246470.1:XP_005246472.1:XP_005246474.1
Core matrisome	ECM Glycoproteins	FRAS1	Fraser syndrome 1	19185	Fraser syndrome	Ensembl	2052	D6RCP6:H0Y8V2:H0Y930:H0Y9A6:H0Y9C9:Q86XX4	NP_001159605.1:NP_079350.5
Core matrisome	ECM Glycoproteins	FRAS1	Fraser syndrome 1	19185	Fraser syndrome	NA	2052	D6RCP6:H0Y8V2:H0Y930:H0Y9A6:H0Y9C9:Q86XX4	NP_001159605.1:NP_079350.5
Core matrisome	ECM Glycoproteins	FRAS1	Fraser syndrome 1	19185	Fraser syndrome	NA	2052	D6RCP6:H0Y8V2:H0Y930:H0Y9A6:H0Y9C9:Q86XX4	NP_001159605.1:NP_079350.5
Core matrisome	ECM Glycoproteins	FRAS1	Fraser syndrome 1	19185	Fraser syndrome	NA	2052	D6RCP6:H0Y8V2:H0Y930:H0Y9A6:H0Y9C9:Q86XX4	NP_001159605.1:NP_079350.5
Core matrisome	ECM Glycoproteins	FRAS1	Fraser syndrome 1	19185	Fraser syndrome	Genatlas	2052	D6RCP6:H0Y8V2:H0Y930:H0Y9A6:H0Y9C9:Q86XX4	NP_001159605.1:NP_079350.5
Core matrisome	ECM Glycoproteins	FRAS1	Fraser syndrome 1	19185	Fraser syndrome	HGNC	2052	D6RCP6:H0Y8V2:H0Y930:H0Y9A6:H0Y9C9:Q86XX4	NP_001159605.1:NP_079350.5
Core matrisome	ECM Glycoproteins	FRAS1	Fraser syndrome 1	19185	Fraser syndrome	OMIM	2052	D6RCP6:H0Y8V2:H0Y930:H0Y9A6:H0Y9C9:Q86XX4	NP_001159605.1:NP_079350.5
Core matrisome	ECM Glycoproteins	FRAS1	Fraser syndrome 1	19185	Fraser syndrome	SwissProt	2052	D6RCP6:H0Y8V2:H0Y930:H0Y9A6:H0Y9C9:Q86XX4	NP_001159605.1:NP_079350.5
Core matrisome	ECM Glycoproteins	FRAS1	Fraser syndrome 1	19185	Fraser syndrome	NA	2052	D6RCP6:H0Y8V2:H0Y930:H0Y9A6:H0Y9C9:Q86XX4	NP_001159605.1:NP_079350.5
Core matrisome	ECM Glycoproteins	FRAS1	Fraser syndrome 1	19185	Renal agenesis, unilateral	Ensembl	93100	D6RCP6:H0Y8V2:H0Y930:H0Y9A6:H0Y9C9:Q86XX4	NP_001159605.1:NP_079350.5
Core matrisome	ECM Glycoproteins	FRAS1	Fraser syndrome 1	19185	Renal agenesis, unilateral	NA	93100	D6RCP6:H0Y8V2:H0Y930:H0Y9A6:H0Y9C9:Q86XX4	NP_001159605.1:NP_079350.5
Core matrisome	ECM Glycoproteins	FRAS1	Fraser syndrome 1	19185	Renal agenesis, unilateral	NA	93100	D6RCP6:H0Y8V2:H0Y930:H0Y9A6:H0Y9C9:Q86XX4	NP_001159605.1:NP_079350.5
Core matrisome	ECM Glycoproteins	FRAS1	Fraser syndrome 1	19185	Renal agenesis, unilateral	NA	93100	D6RCP6:H0Y8V2:H0Y930:H0Y9A6:H0Y9C9:Q86XX4	NP_001159605.1:NP_079350.5
Core matrisome	ECM Glycoproteins	FRAS1	Fraser syndrome 1	19185	Renal agenesis, unilateral	Genatlas	93100	D6RCP6:H0Y8V2:H0Y930:H0Y9A6:H0Y9C9:Q86XX4	NP_001159605.1:NP_079350.5
Core matrisome	ECM Glycoproteins	FRAS1	Fraser syndrome 1	19185	Renal agenesis, unilateral	HGNC	93100	D6RCP6:H0Y8V2:H0Y930:H0Y9A6:H0Y9C9:Q86XX4	NP_001159605.1:NP_079350.5
Core matrisome	ECM Glycoproteins	FRAS1	Fraser syndrome 1	19185	Renal agenesis, unilateral	OMIM	93100	D6RCP6:H0Y8V2:H0Y930:H0Y9A6:H0Y9C9:Q86XX4	NP_001159605.1:NP_079350.5
Core matrisome	ECM Glycoproteins	FRAS1	Fraser syndrome 1	19185	Renal agenesis, unilateral	SwissProt	93100	D6RCP6:H0Y8V2:H0Y930:H0Y9A6:H0Y9C9:Q86XX4	NP_001159605.1:NP_079350.5
Core matrisome	ECM Glycoproteins	FRAS1	Fraser syndrome 1	19185	Renal agenesis, unilateral	NA	93100	D6RCP6:H0Y8V2:H0Y930:H0Y9A6:H0Y9C9:Q86XX4	NP_001159605.1:NP_079350.5
Core matrisome	ECM Glycoproteins	IGFALS	insulin-like growth factor binding protein, acid labile subunit	5468	Short stature due to primary acid-labile subunit deficiency	Ensembl	140941	H3BSX8:P35858	NP_001139478.1:NP_004961.1
Core matrisome	ECM Glycoproteins	IGFALS	insulin-like growth factor binding protein, acid labile subunit	5468	Short stature due to primary acid-labile subunit deficiency	NA	140941	H3BSX8:P35858	NP_001139478.1:NP_004961.1
Core matrisome	ECM Glycoproteins	IGFALS	insulin-like growth factor binding protein, acid labile subunit	5468	Short stature due to primary acid-labile subunit deficiency	Genatlas	140941	H3BSX8:P35858	NP_001139478.1:NP_004961.1
Core matrisome	ECM Glycoproteins	IGFALS	insulin-like growth factor binding protein, acid labile subunit	5468	Short stature due to primary acid-labile subunit deficiency	HGNC	140941	H3BSX8:P35858	NP_001139478.1:NP_004961.1
Core matrisome	ECM Glycoproteins	IGFALS	insulin-like growth factor binding protein, acid labile subunit	5468	Short stature due to primary acid-labile subunit deficiency	OMIM	140941	H3BSX8:P35858	NP_001139478.1:NP_004961.1
Core matrisome	ECM Glycoproteins	IGFALS	insulin-like growth factor binding protein, acid labile subunit	5468	Short stature due to primary acid-labile subunit deficiency	Reactome	140941	H3BSX8:P35858	NP_001139478.1:NP_004961.1
Core matrisome	ECM Glycoproteins	IGFALS	insulin-like growth factor binding protein, acid labile subunit	5468	Short stature due to primary acid-labile subunit deficiency	SwissProt	140941	H3BSX8:P35858	NP_001139478.1:NP_004961.1
Core matrisome	ECM Glycoproteins	IGFALS	insulin-like growth factor binding protein, acid labile subunit	5468	Short stature due to primary acid-labile subunit deficiency	NA	140941	H3BSX8:P35858	NP_001139478.1:NP_004961.1
Core matrisome	ECM Glycoproteins	IGFBP7	insulin-like growth factor binding protein 7	5476	Familial retinal arterial macroaneurysm	NA	284247	Q16270	NP_001240764.1:NP_001544.1
Core matrisome	ECM Glycoproteins	IGFBP7	insulin-like growth factor binding protein 7	5476	Familial retinal arterial macroaneurysm	NA	284247	Q16270	NP_001240764.1:NP_001544.1
Core matrisome	ECM Glycoproteins	IGFBP7	insulin-like growth factor binding protein 7	5476	Familial retinal arterial macroaneurysm	NA	284247	Q16270	NP_001240764.1:NP_001544.1
Core matrisome	ECM Glycoproteins	IGFBP7	insulin-like growth factor binding protein 7	5476	Familial retinal arterial macroaneurysm	NA	284247	Q16270	NP_001240764.1:NP_001544.1
Core matrisome	ECM Glycoproteins	IGFBP7	insulin-like growth factor binding protein 7	5476	Familial retinal arterial macroaneurysm	Genatlas	284247	Q16270	NP_001240764.1:NP_001544.1
Core matrisome	ECM Glycoproteins	IGFBP7	insulin-like growth factor binding protein 7	5476	Familial retinal arterial macroaneurysm	HGNC	284247	Q16270	NP_001240764.1:NP_001544.1
Core matrisome	ECM Glycoproteins	IGFBP7	insulin-like growth factor binding protein 7	5476	Familial retinal arterial macroaneurysm	OMIM	284247	Q16270	NP_001240764.1:NP_001544.1
Core matrisome	ECM Glycoproteins	IGFBP7	insulin-like growth factor binding protein 7	5476	Familial retinal arterial macroaneurysm	Reactome	284247	Q16270	NP_001240764.1:NP_001544.1
Core matrisome	ECM Glycoproteins	IGFBP7	insulin-like growth factor binding protein 7	5476	Familial retinal arterial macroaneurysm	SwissProt	284247	Q16270	NP_001240764.1:NP_001544.1
Core matrisome	ECM Glycoproteins	IGFBP7	insulin-like growth factor binding protein 7	5476	Familial retinal arterial macroaneurysm	NA	284247	Q16270	NP_001240764.1:NP_001544.1
Core matrisome	ECM Glycoproteins	IGFBP7	insulin-like growth factor binding protein 7	5476	Familial retinal arterial macroaneurysm	Ensembl	284247	Q16270	NP_001240764.1:NP_001544.1
Core matrisome	ECM Glycoproteins	LAMA1	laminin, alpha 1	6481	Ataxia-intellectual disability-oculomotor apraxia-cerebellar cysts syndrome	NA	370022	P25391	NP_005550.2
Core matrisome	ECM Glycoproteins	LAMA1	laminin, alpha 1	6481	Ataxia-intellectual disability-oculomotor apraxia-cerebellar cysts syndrome	Genatlas	370022	P25391	NP_005550.2
Core matrisome	ECM Glycoproteins	LAMA1	laminin, alpha 1	6481	Ataxia-intellectual disability-oculomotor apraxia-cerebellar cysts syndrome	HGNC	370022	P25391	NP_005550.2
Core matrisome	ECM Glycoproteins	LAMA1	laminin, alpha 1	6481	Ataxia-intellectual disability-oculomotor apraxia-cerebellar cysts syndrome	OMIM	370022	P25391	NP_005550.2
Core matrisome	ECM Glycoproteins	LAMA1	laminin, alpha 1	6481	Ataxia-intellectual disability-oculomotor apraxia-cerebellar cysts syndrome	Reactome	370022	P25391	NP_005550.2
Core matrisome	ECM Glycoproteins	LAMA1	laminin, alpha 1	6481	Ataxia-intellectual disability-oculomotor apraxia-cerebellar cysts syndrome	SwissProt	370022	P25391	NP_005550.2
Core matrisome	ECM Glycoproteins	LAMA1	laminin, alpha 1	6481	Ataxia-intellectual disability-oculomotor apraxia-cerebellar cysts syndrome	NA	370022	P25391	NP_005550.2
Core matrisome	ECM Glycoproteins	LAMA1	laminin, alpha 1	6481	Ataxia-intellectual disability-oculomotor apraxia-cerebellar cysts syndrome	Ensembl	370022	P25391	NP_005550.2
Core matrisome	ECM Glycoproteins	LAMA2	laminin, alpha 2	6482	Congenital muscular dystrophy type 1A	NA	258	P24043	NP_000417.2:NP_001073291.1
Core matrisome	ECM Glycoproteins	LAMA2	laminin, alpha 2	6482	Congenital muscular dystrophy type 1A	NA	258	P24043	NP_000417.2:NP_001073291.1
Core matrisome	ECM Glycoproteins	LAMA2	laminin, alpha 2	6482	Congenital muscular dystrophy type 1A	OMIM	258	P24043	NP_000417.2:NP_001073291.1
Core matrisome	ECM Glycoproteins	LAMA2	laminin, alpha 2	6482	Congenital muscular dystrophy type 1A	Reactome	258	P24043	NP_000417.2:NP_001073291.1
Core matrisome	ECM Glycoproteins	LAMA2	laminin, alpha 2	6482	Congenital muscular dystrophy type 1A	SwissProt	258	P24043	NP_000417.2:NP_001073291.1
Core matrisome	ECM Glycoproteins	LAMA2	laminin, alpha 2	6482	Congenital muscular dystrophy type 1A	Genatlas	258	P24043	NP_000417.2:NP_001073291.1
Core matrisome	ECM Glycoproteins	LAMA2	laminin, alpha 2	6482	Congenital muscular dystrophy type 1A	HGNC	258	P24043	NP_000417.2:NP_001073291.1
Core matrisome	ECM Glycoproteins	LAMA2	laminin, alpha 2	6482	Congenital muscular dystrophy type 1A	NA	258	P24043	NP_000417.2:NP_001073291.1
Core matrisome	ECM Glycoproteins	LAMA2	laminin, alpha 2	6482	Congenital muscular dystrophy type 1A	Ensembl	258	P24043	NP_000417.2:NP_001073291.1
Core matrisome	ECM Glycoproteins	LAMA3	laminin, alpha 3	6483	Junctional epidermolysis bullosa, generalized intermediate	Ensembl	79402	K7EIP4:K7EMU9:K7EPP3:K7EQ42:K7ERM0:Q16787	NP_000218.2:NP_001121189.1:NP_001121190.1:NP_937762.1
Core matrisome	ECM Glycoproteins	LAMA3	laminin, alpha 3	6483	Junctional epidermolysis bullosa, generalized intermediate	NA	79402	K7EIP4:K7EMU9:K7EPP3:K7EQ42:K7ERM0:Q16787	NP_000218.2:NP_001121189.1:NP_001121190.1:NP_937762.1
Core matrisome	ECM Glycoproteins	LAMA3	laminin, alpha 3	6483	Junctional epidermolysis bullosa, generalized intermediate	NA	79402	K7EIP4:K7EMU9:K7EPP3:K7EQ42:K7ERM0:Q16787	NP_000218.2:NP_001121189.1:NP_001121190.1:NP_937762.1
Core matrisome	ECM Glycoproteins	LAMA3	laminin, alpha 3	6483	Junctional epidermolysis bullosa, generalized intermediate	NA	79402	K7EIP4:K7EMU9:K7EPP3:K7EQ42:K7ERM0:Q16787	NP_000218.2:NP_001121189.1:NP_001121190.1:NP_937762.1
Core matrisome	ECM Glycoproteins	LAMA3	laminin, alpha 3	6483	Junctional epidermolysis bullosa, generalized intermediate	NA	79402	K7EIP4:K7EMU9:K7EPP3:K7EQ42:K7ERM0:Q16787	NP_000218.2:NP_001121189.1:NP_001121190.1:NP_937762.1
Core matrisome	ECM Glycoproteins	LAMA3	laminin, alpha 3	6483	Junctional epidermolysis bullosa, generalized intermediate	Genatlas	79402	K7EIP4:K7EMU9:K7EPP3:K7EQ42:K7ERM0:Q16787	NP_000218.2:NP_001121189.1:NP_001121190.1:NP_937762.1
Core matrisome	ECM Glycoproteins	LAMA3	laminin, alpha 3	6483	Junctional epidermolysis bullosa, generalized intermediate	HGNC	79402	K7EIP4:K7EMU9:K7EPP3:K7EQ42:K7ERM0:Q16787	NP_000218.2:NP_001121189.1:NP_001121190.1:NP_937762.1
Core matrisome	ECM Glycoproteins	LAMA3	laminin, alpha 3	6483	Junctional epidermolysis bullosa, generalized intermediate	OMIM	79402	K7EIP4:K7EMU9:K7EPP3:K7EQ42:K7ERM0:Q16787	NP_000218.2:NP_001121189.1:NP_001121190.1:NP_937762.1
Core matrisome	ECM Glycoproteins	LAMA3	laminin, alpha 3	6483	Junctional epidermolysis bullosa, generalized intermediate	Reactome	79402	K7EIP4:K7EMU9:K7EPP3:K7EQ42:K7ERM0:Q16787	NP_000218.2:NP_001121189.1:NP_001121190.1:NP_937762.1
Core matrisome	ECM Glycoproteins	LAMA3	laminin, alpha 3	6483	Junctional epidermolysis bullosa, generalized intermediate	SwissProt	79402	K7EIP4:K7EMU9:K7EPP3:K7EQ42:K7ERM0:Q16787	NP_000218.2:NP_001121189.1:NP_001121190.1:NP_937762.1
Core matrisome	ECM Glycoproteins	LAMA3	laminin, alpha 3	6483	Junctional epidermolysis bullosa, generalized intermediate	NA	79402	K7EIP4:K7EMU9:K7EPP3:K7EQ42:K7ERM0:Q16787	NP_000218.2:NP_001121189.1:NP_001121190.1:NP_937762.1
Core matrisome	ECM Glycoproteins	LAMA3	laminin, alpha 3	6483	Junctional epidermolysis bullosa, generalized severe	Ensembl	79404	K7EIP4:K7EMU9:K7EPP3:K7EQ42:K7ERM0:Q16787	NP_000218.2:NP_001121189.1:NP_001121190.1:NP_937762.1
Core matrisome	ECM Glycoproteins	LAMA3	laminin, alpha 3	6483	Junctional epidermolysis bullosa, generalized severe	NA	79404	K7EIP4:K7EMU9:K7EPP3:K7EQ42:K7ERM0:Q16787	NP_000218.2:NP_001121189.1:NP_001121190.1:NP_937762.1
Core matrisome	ECM Glycoproteins	LAMA3	laminin, alpha 3	6483	Junctional epidermolysis bullosa, generalized severe	NA	79404	K7EIP4:K7EMU9:K7EPP3:K7EQ42:K7ERM0:Q16787	NP_000218.2:NP_001121189.1:NP_001121190.1:NP_937762.1
Core matrisome	ECM Glycoproteins	LAMA3	laminin, alpha 3	6483	Junctional epidermolysis bullosa, generalized severe	NA	79404	K7EIP4:K7EMU9:K7EPP3:K7EQ42:K7ERM0:Q16787	NP_000218.2:NP_001121189.1:NP_001121190.1:NP_937762.1
Core matrisome	ECM Glycoproteins	LAMA3	laminin, alpha 3	6483	Junctional epidermolysis bullosa, generalized severe	NA	79404	K7EIP4:K7EMU9:K7EPP3:K7EQ42:K7ERM0:Q16787	NP_000218.2:NP_001121189.1:NP_001121190.1:NP_937762.1
Core matrisome	ECM Glycoproteins	LAMA3	laminin, alpha 3	6483	Junctional epidermolysis bullosa, generalized severe	Genatlas	79404	K7EIP4:K7EMU9:K7EPP3:K7EQ42:K7ERM0:Q16787	NP_000218.2:NP_001121189.1:NP_001121190.1:NP_937762.1
Core matrisome	ECM Glycoproteins	LAMA3	laminin, alpha 3	6483	Junctional epidermolysis bullosa, generalized severe	HGNC	79404	K7EIP4:K7EMU9:K7EPP3:K7EQ42:K7ERM0:Q16787	NP_000218.2:NP_001121189.1:NP_001121190.1:NP_937762.1
Core matrisome	ECM Glycoproteins	LAMA3	laminin, alpha 3	6483	Junctional epidermolysis bullosa, generalized severe	OMIM	79404	K7EIP4:K7EMU9:K7EPP3:K7EQ42:K7ERM0:Q16787	NP_000218.2:NP_001121189.1:NP_001121190.1:NP_937762.1
Core matrisome	ECM Glycoproteins	LAMA3	laminin, alpha 3	6483	Junctional epidermolysis bullosa, generalized severe	Reactome	79404	K7EIP4:K7EMU9:K7EPP3:K7EQ42:K7ERM0:Q16787	NP_000218.2:NP_001121189.1:NP_001121190.1:NP_937762.1
Core matrisome	ECM Glycoproteins	LAMA3	laminin, alpha 3	6483	Junctional epidermolysis bullosa, generalized severe	SwissProt	79404	K7EIP4:K7EMU9:K7EPP3:K7EQ42:K7ERM0:Q16787	NP_000218.2:NP_001121189.1:NP_001121190.1:NP_937762.1
Core matrisome	ECM Glycoproteins	LAMA3	laminin, alpha 3	6483	Junctional epidermolysis bullosa, generalized severe	NA	79404	K7EIP4:K7EMU9:K7EPP3:K7EQ42:K7ERM0:Q16787	NP_000218.2:NP_001121189.1:NP_001121190.1:NP_937762.1
Core matrisome	ECM Glycoproteins	LAMA3	laminin, alpha 3	6483	LOC syndrome	Ensembl	2407	K7EIP4:K7EMU9:K7EPP3:K7EQ42:K7ERM0:Q16787	NP_000218.2:NP_001121189.1:NP_001121190.1:NP_937762.1
Core matrisome	ECM Glycoproteins	LAMA3	laminin, alpha 3	6483	LOC syndrome	NA	2407	K7EIP4:K7EMU9:K7EPP3:K7EQ42:K7ERM0:Q16787	NP_000218.2:NP_001121189.1:NP_001121190.1:NP_937762.1
Core matrisome	ECM Glycoproteins	LAMA3	laminin, alpha 3	6483	LOC syndrome	NA	2407	K7EIP4:K7EMU9:K7EPP3:K7EQ42:K7ERM0:Q16787	NP_000218.2:NP_001121189.1:NP_001121190.1:NP_937762.1
Core matrisome	ECM Glycoproteins	LAMA3	laminin, alpha 3	6483	LOC syndrome	NA	2407	K7EIP4:K7EMU9:K7EPP3:K7EQ42:K7ERM0:Q16787	NP_000218.2:NP_001121189.1:NP_001121190.1:NP_937762.1
Core matrisome	ECM Glycoproteins	LAMA3	laminin, alpha 3	6483	LOC syndrome	NA	2407	K7EIP4:K7EMU9:K7EPP3:K7EQ42:K7ERM0:Q16787	NP_000218.2:NP_001121189.1:NP_001121190.1:NP_937762.1
Core matrisome	ECM Glycoproteins	LAMA3	laminin, alpha 3	6483	LOC syndrome	Genatlas	2407	K7EIP4:K7EMU9:K7EPP3:K7EQ42:K7ERM0:Q16787	NP_000218.2:NP_001121189.1:NP_001121190.1:NP_937762.1
Core matrisome	ECM Glycoproteins	LAMA3	laminin, alpha 3	6483	LOC syndrome	HGNC	2407	K7EIP4:K7EMU9:K7EPP3:K7EQ42:K7ERM0:Q16787	NP_000218.2:NP_001121189.1:NP_001121190.1:NP_937762.1
Core matrisome	ECM Glycoproteins	LAMA3	laminin, alpha 3	6483	LOC syndrome	OMIM	2407	K7EIP4:K7EMU9:K7EPP3:K7EQ42:K7ERM0:Q16787	NP_000218.2:NP_001121189.1:NP_001121190.1:NP_937762.1
Core matrisome	ECM Glycoproteins	LAMA3	laminin, alpha 3	6483	LOC syndrome	Reactome	2407	K7EIP4:K7EMU9:K7EPP3:K7EQ42:K7ERM0:Q16787	NP_000218.2:NP_001121189.1:NP_001121190.1:NP_937762.1
Core matrisome	ECM Glycoproteins	LAMA3	laminin, alpha 3	6483	LOC syndrome	SwissProt	2407	K7EIP4:K7EMU9:K7EPP3:K7EQ42:K7ERM0:Q16787	NP_000218.2:NP_001121189.1:NP_001121190.1:NP_937762.1
Core matrisome	ECM Glycoproteins	LAMA3	laminin, alpha 3	6483	LOC syndrome	NA	2407	K7EIP4:K7EMU9:K7EPP3:K7EQ42:K7ERM0:Q16787	NP_000218.2:NP_001121189.1:NP_001121190.1:NP_937762.1
Core matrisome	ECM Glycoproteins	LAMA4	laminin, alpha 4	6484	Familial isolated dilated cardiomyopathy	NA	154	E5RFD7:E5RFQ2:E5RHF3:E5RK79:H0Y351:H0YAP9:H0YAQ5:Q16363:Q6LET9	NP_001098676.2:NP_001098677.2:NP_001098678.1:NP_001098679.1:NP_002281.3
Core matrisome	ECM Glycoproteins	LAMA4	laminin, alpha 4	6484	Familial isolated dilated cardiomyopathy	Genatlas	154	E5RFD7:E5RFQ2:E5RHF3:E5RK79:H0Y351:H0YAP9:H0YAQ5:Q16363:Q6LET9	NP_001098676.2:NP_001098677.2:NP_001098678.1:NP_001098679.1:NP_002281.3
Core matrisome	ECM Glycoproteins	LAMA4	laminin, alpha 4	6484	Familial isolated dilated cardiomyopathy	HGNC	154	E5RFD7:E5RFQ2:E5RHF3:E5RK79:H0Y351:H0YAP9:H0YAQ5:Q16363:Q6LET9	NP_001098676.2:NP_001098677.2:NP_001098678.1:NP_001098679.1:NP_002281.3
Core matrisome	ECM Glycoproteins	LAMA4	laminin, alpha 4	6484	Familial isolated dilated cardiomyopathy	OMIM	154	E5RFD7:E5RFQ2:E5RHF3:E5RK79:H0Y351:H0YAP9:H0YAQ5:Q16363:Q6LET9	NP_001098676.2:NP_001098677.2:NP_001098678.1:NP_001098679.1:NP_002281.3
Core matrisome	ECM Glycoproteins	LAMA4	laminin, alpha 4	6484	Familial isolated dilated cardiomyopathy	Reactome	154	E5RFD7:E5RFQ2:E5RHF3:E5RK79:H0Y351:H0YAP9:H0YAQ5:Q16363:Q6LET9	NP_001098676.2:NP_001098677.2:NP_001098678.1:NP_001098679.1:NP_002281.3
Core matrisome	ECM Glycoproteins	LAMA4	laminin, alpha 4	6484	Familial isolated dilated cardiomyopathy	SwissProt	154	E5RFD7:E5RFQ2:E5RHF3:E5RK79:H0Y351:H0YAP9:H0YAQ5:Q16363:Q6LET9	NP_001098676.2:NP_001098677.2:NP_001098678.1:NP_001098679.1:NP_002281.3
Core matrisome	ECM Glycoproteins	LAMA4	laminin, alpha 4	6484	Familial isolated dilated cardiomyopathy	NA	154	E5RFD7:E5RFQ2:E5RHF3:E5RK79:H0Y351:H0YAP9:H0YAQ5:Q16363:Q6LET9	NP_001098676.2:NP_001098677.2:NP_001098678.1:NP_001098679.1:NP_002281.3
Core matrisome	ECM Glycoproteins	LAMA4	laminin, alpha 4	6484	Familial isolated dilated cardiomyopathy	Ensembl	154	E5RFD7:E5RFQ2:E5RHF3:E5RK79:H0Y351:H0YAP9:H0YAQ5:Q16363:Q6LET9	NP_001098676.2:NP_001098677.2:NP_001098678.1:NP_001098679.1:NP_002281.3
Core matrisome	ECM Glycoproteins	LAMA5	laminin, alpha 5	6485	LAMA5-related multisystemic syndrome	NA	521450	E2QRK0:F2Z2S4:H7C5J6:O15230:Q5JTP4	NP_005551.3
Core matrisome	ECM Glycoproteins	LAMA5	laminin, alpha 5	6485	LAMA5-related multisystemic syndrome	HGNC	521450	E2QRK0:F2Z2S4:H7C5J6:O15230:Q5JTP4	NP_005551.3
Core matrisome	ECM Glycoproteins	LAMA5	laminin, alpha 5	6485	LAMA5-related multisystemic syndrome	Reactome	521450	E2QRK0:F2Z2S4:H7C5J6:O15230:Q5JTP4	NP_005551.3
Core matrisome	ECM Glycoproteins	LAMA5	laminin, alpha 5	6485	LAMA5-related multisystemic syndrome	SwissProt	521450	E2QRK0:F2Z2S4:H7C5J6:O15230:Q5JTP4	NP_005551.3
Core matrisome	ECM Glycoproteins	LAMA5	laminin, alpha 5	6485	LAMA5-related multisystemic syndrome	OMIM	521450	E2QRK0:F2Z2S4:H7C5J6:O15230:Q5JTP4	NP_005551.3
Core matrisome	ECM Glycoproteins	LAMA5	laminin, alpha 5	6485	LAMA5-related multisystemic syndrome	Genatlas	521450	E2QRK0:F2Z2S4:H7C5J6:O15230:Q5JTP4	NP_005551.3
Core matrisome	ECM Glycoproteins	LAMA5	laminin, alpha 5	6485	LAMA5-related multisystemic syndrome	NA	521450	E2QRK0:F2Z2S4:H7C5J6:O15230:Q5JTP4	NP_005551.3
Core matrisome	ECM Glycoproteins	LAMA5	laminin, alpha 5	6485	LAMA5-related multisystemic syndrome	Ensembl	521450	E2QRK0:F2Z2S4:H7C5J6:O15230:Q5JTP4	NP_005551.3
Core matrisome	ECM Glycoproteins	LAMB1	laminin, beta 1	6486	Cobblestone lissencephaly without muscular or ocular involvement	NA	352682	C9J296:E7EPA6:E9PCS6:G3XAI2:P07942	NP_002282.2
Core matrisome	ECM Glycoproteins	LAMB1	laminin, beta 1	6486	Cobblestone lissencephaly without muscular or ocular involvement	Genatlas	352682	C9J296:E7EPA6:E9PCS6:G3XAI2:P07942	NP_002282.2
Core matrisome	ECM Glycoproteins	LAMB1	laminin, beta 1	6486	Cobblestone lissencephaly without muscular or ocular involvement	HGNC	352682	C9J296:E7EPA6:E9PCS6:G3XAI2:P07942	NP_002282.2
Core matrisome	ECM Glycoproteins	LAMB1	laminin, beta 1	6486	Cobblestone lissencephaly without muscular or ocular involvement	OMIM	352682	C9J296:E7EPA6:E9PCS6:G3XAI2:P07942	NP_002282.2
Core matrisome	ECM Glycoproteins	LAMB1	laminin, beta 1	6486	Cobblestone lissencephaly without muscular or ocular involvement	Reactome	352682	C9J296:E7EPA6:E9PCS6:G3XAI2:P07942	NP_002282.2
Core matrisome	ECM Glycoproteins	LAMB1	laminin, beta 1	6486	Cobblestone lissencephaly without muscular or ocular involvement	SwissProt	352682	C9J296:E7EPA6:E9PCS6:G3XAI2:P07942	NP_002282.2
Core matrisome	ECM Glycoproteins	LAMB1	laminin, beta 1	6486	Cobblestone lissencephaly without muscular or ocular involvement	NA	352682	C9J296:E7EPA6:E9PCS6:G3XAI2:P07942	NP_002282.2
Core matrisome	ECM Glycoproteins	LAMB1	laminin, beta 1	6486	Cobblestone lissencephaly without muscular or ocular involvement	Ensembl	352682	C9J296:E7EPA6:E9PCS6:G3XAI2:P07942	NP_002282.2
Core matrisome	ECM Glycoproteins	LAMB2	laminin, beta 2 (laminin S)	6487	LAMB2-related infantile-onset nephrotic syndrome	Ensembl	306507	F5H520:P55268	NP_002283.3:XP_005265184.1
Core matrisome	ECM Glycoproteins	LAMB2	laminin, beta 2 (laminin S)	6487	LAMB2-related infantile-onset nephrotic syndrome	NA	306507	F5H520:P55268	NP_002283.3:XP_005265184.1
Core matrisome	ECM Glycoproteins	LAMB2	laminin, beta 2 (laminin S)	6487	LAMB2-related infantile-onset nephrotic syndrome	NA	306507	F5H520:P55268	NP_002283.3:XP_005265184.1
Core matrisome	ECM Glycoproteins	LAMB2	laminin, beta 2 (laminin S)	6487	LAMB2-related infantile-onset nephrotic syndrome	Genatlas	306507	F5H520:P55268	NP_002283.3:XP_005265184.1
Core matrisome	ECM Glycoproteins	LAMB2	laminin, beta 2 (laminin S)	6487	LAMB2-related infantile-onset nephrotic syndrome	HGNC	306507	F5H520:P55268	NP_002283.3:XP_005265184.1
Core matrisome	ECM Glycoproteins	LAMB2	laminin, beta 2 (laminin S)	6487	LAMB2-related infantile-onset nephrotic syndrome	OMIM	306507	F5H520:P55268	NP_002283.3:XP_005265184.1
Core matrisome	ECM Glycoproteins	LAMB2	laminin, beta 2 (laminin S)	6487	LAMB2-related infantile-onset nephrotic syndrome	Reactome	306507	F5H520:P55268	NP_002283.3:XP_005265184.1
Core matrisome	ECM Glycoproteins	LAMB2	laminin, beta 2 (laminin S)	6487	LAMB2-related infantile-onset nephrotic syndrome	SwissProt	306507	F5H520:P55268	NP_002283.3:XP_005265184.1
Core matrisome	ECM Glycoproteins	LAMB2	laminin, beta 2 (laminin S)	6487	LAMB2-related infantile-onset nephrotic syndrome	NA	306507	F5H520:P55268	NP_002283.3:XP_005265184.1
Core matrisome	ECM Glycoproteins	LAMB2	laminin, beta 2 (laminin S)	6487	Pierson syndrome	Ensembl	2670	F5H520:P55268	NP_002283.3:XP_005265184.1
Core matrisome	ECM Glycoproteins	LAMB2	laminin, beta 2 (laminin S)	6487	Pierson syndrome	NA	2670	F5H520:P55268	NP_002283.3:XP_005265184.1
Core matrisome	ECM Glycoproteins	LAMB2	laminin, beta 2 (laminin S)	6487	Pierson syndrome	NA	2670	F5H520:P55268	NP_002283.3:XP_005265184.1
Core matrisome	ECM Glycoproteins	LAMB2	laminin, beta 2 (laminin S)	6487	Pierson syndrome	Genatlas	2670	F5H520:P55268	NP_002283.3:XP_005265184.1
Core matrisome	ECM Glycoproteins	LAMB2	laminin, beta 2 (laminin S)	6487	Pierson syndrome	HGNC	2670	F5H520:P55268	NP_002283.3:XP_005265184.1
Core matrisome	ECM Glycoproteins	LAMB2	laminin, beta 2 (laminin S)	6487	Pierson syndrome	OMIM	2670	F5H520:P55268	NP_002283.3:XP_005265184.1
Core matrisome	ECM Glycoproteins	LAMB2	laminin, beta 2 (laminin S)	6487	Pierson syndrome	Reactome	2670	F5H520:P55268	NP_002283.3:XP_005265184.1
Core matrisome	ECM Glycoproteins	LAMB2	laminin, beta 2 (laminin S)	6487	Pierson syndrome	SwissProt	2670	F5H520:P55268	NP_002283.3:XP_005265184.1
Core matrisome	ECM Glycoproteins	LAMB2	laminin, beta 2 (laminin S)	6487	Pierson syndrome	NA	2670	F5H520:P55268	NP_002283.3:XP_005265184.1
Core matrisome	ECM Glycoproteins	LAMB2	laminin, beta 2 (laminin S)	6487	Synaptic congenital myasthenic syndromes	Ensembl	98915	F5H520:P55268	NP_002283.3:XP_005265184.1
Core matrisome	ECM Glycoproteins	LAMB2	laminin, beta 2 (laminin S)	6487	Synaptic congenital myasthenic syndromes	NA	98915	F5H520:P55268	NP_002283.3:XP_005265184.1
Core matrisome	ECM Glycoproteins	LAMB2	laminin, beta 2 (laminin S)	6487	Synaptic congenital myasthenic syndromes	NA	98915	F5H520:P55268	NP_002283.3:XP_005265184.1
Core matrisome	ECM Glycoproteins	LAMB2	laminin, beta 2 (laminin S)	6487	Synaptic congenital myasthenic syndromes	Genatlas	98915	F5H520:P55268	NP_002283.3:XP_005265184.1
Core matrisome	ECM Glycoproteins	LAMB2	laminin, beta 2 (laminin S)	6487	Synaptic congenital myasthenic syndromes	HGNC	98915	F5H520:P55268	NP_002283.3:XP_005265184.1
Core matrisome	ECM Glycoproteins	LAMB2	laminin, beta 2 (laminin S)	6487	Synaptic congenital myasthenic syndromes	OMIM	98915	F5H520:P55268	NP_002283.3:XP_005265184.1
Core matrisome	ECM Glycoproteins	LAMB2	laminin, beta 2 (laminin S)	6487	Synaptic congenital myasthenic syndromes	Reactome	98915	F5H520:P55268	NP_002283.3:XP_005265184.1
Core matrisome	ECM Glycoproteins	LAMB2	laminin, beta 2 (laminin S)	6487	Synaptic congenital myasthenic syndromes	SwissProt	98915	F5H520:P55268	NP_002283.3:XP_005265184.1
Core matrisome	ECM Glycoproteins	LAMB2	laminin, beta 2 (laminin S)	6487	Synaptic congenital myasthenic syndromes	NA	98915	F5H520:P55268	NP_002283.3:XP_005265184.1
Core matrisome	ECM Glycoproteins	LAMB3	laminin, beta 3	6490	Hypoplastic amelogenesis imperfecta	Ensembl	100031	Q13751:Q5THA1:X1WI29	NP_000219.2:NP_001017402.1:NP_001121113.1:XP_005273181.1
Core matrisome	ECM Glycoproteins	LAMB3	laminin, beta 3	6490	Hypoplastic amelogenesis imperfecta	NA	100031	Q13751:Q5THA1:X1WI29	NP_000219.2:NP_001017402.1:NP_001121113.1:XP_005273181.1
Core matrisome	ECM Glycoproteins	LAMB3	laminin, beta 3	6490	Hypoplastic amelogenesis imperfecta	NA	100031	Q13751:Q5THA1:X1WI29	NP_000219.2:NP_001017402.1:NP_001121113.1:XP_005273181.1
Core matrisome	ECM Glycoproteins	LAMB3	laminin, beta 3	6490	Hypoplastic amelogenesis imperfecta	NA	100031	Q13751:Q5THA1:X1WI29	NP_000219.2:NP_001017402.1:NP_001121113.1:XP_005273181.1
Core matrisome	ECM Glycoproteins	LAMB3	laminin, beta 3	6490	Hypoplastic amelogenesis imperfecta	Genatlas	100031	Q13751:Q5THA1:X1WI29	NP_000219.2:NP_001017402.1:NP_001121113.1:XP_005273181.1
Core matrisome	ECM Glycoproteins	LAMB3	laminin, beta 3	6490	Hypoplastic amelogenesis imperfecta	HGNC	100031	Q13751:Q5THA1:X1WI29	NP_000219.2:NP_001017402.1:NP_001121113.1:XP_005273181.1
Core matrisome	ECM Glycoproteins	LAMB3	laminin, beta 3	6490	Hypoplastic amelogenesis imperfecta	OMIM	100031	Q13751:Q5THA1:X1WI29	NP_000219.2:NP_001017402.1:NP_001121113.1:XP_005273181.1
Core matrisome	ECM Glycoproteins	LAMB3	laminin, beta 3	6490	Hypoplastic amelogenesis imperfecta	Reactome	100031	Q13751:Q5THA1:X1WI29	NP_000219.2:NP_001017402.1:NP_001121113.1:XP_005273181.1
Core matrisome	ECM Glycoproteins	LAMB3	laminin, beta 3	6490	Hypoplastic amelogenesis imperfecta	SwissProt	100031	Q13751:Q5THA1:X1WI29	NP_000219.2:NP_001017402.1:NP_001121113.1:XP_005273181.1
Core matrisome	ECM Glycoproteins	LAMB3	laminin, beta 3	6490	Hypoplastic amelogenesis imperfecta	NA	100031	Q13751:Q5THA1:X1WI29	NP_000219.2:NP_001017402.1:NP_001121113.1:XP_005273181.1
Core matrisome	ECM Glycoproteins	LAMB3	laminin, beta 3	6490	Junctional epidermolysis bullosa, generalized intermediate	Ensembl	79402	Q13751:Q5THA1:X1WI29	NP_000219.2:NP_001017402.1:NP_001121113.1:XP_005273181.1
Core matrisome	ECM Glycoproteins	LAMB3	laminin, beta 3	6490	Junctional epidermolysis bullosa, generalized intermediate	NA	79402	Q13751:Q5THA1:X1WI29	NP_000219.2:NP_001017402.1:NP_001121113.1:XP_005273181.1
Core matrisome	ECM Glycoproteins	LAMB3	laminin, beta 3	6490	Junctional epidermolysis bullosa, generalized intermediate	NA	79402	Q13751:Q5THA1:X1WI29	NP_000219.2:NP_001017402.1:NP_001121113.1:XP_005273181.1
Core matrisome	ECM Glycoproteins	LAMB3	laminin, beta 3	6490	Junctional epidermolysis bullosa, generalized intermediate	NA	79402	Q13751:Q5THA1:X1WI29	NP_000219.2:NP_001017402.1:NP_001121113.1:XP_005273181.1
Core matrisome	ECM Glycoproteins	LAMB3	laminin, beta 3	6490	Junctional epidermolysis bullosa, generalized intermediate	Genatlas	79402	Q13751:Q5THA1:X1WI29	NP_000219.2:NP_001017402.1:NP_001121113.1:XP_005273181.1
Core matrisome	ECM Glycoproteins	LAMB3	laminin, beta 3	6490	Junctional epidermolysis bullosa, generalized intermediate	HGNC	79402	Q13751:Q5THA1:X1WI29	NP_000219.2:NP_001017402.1:NP_001121113.1:XP_005273181.1
Core matrisome	ECM Glycoproteins	LAMB3	laminin, beta 3	6490	Junctional epidermolysis bullosa, generalized intermediate	OMIM	79402	Q13751:Q5THA1:X1WI29	NP_000219.2:NP_001017402.1:NP_001121113.1:XP_005273181.1
Core matrisome	ECM Glycoproteins	LAMB3	laminin, beta 3	6490	Junctional epidermolysis bullosa, generalized intermediate	Reactome	79402	Q13751:Q5THA1:X1WI29	NP_000219.2:NP_001017402.1:NP_001121113.1:XP_005273181.1
Core matrisome	ECM Glycoproteins	LAMB3	laminin, beta 3	6490	Junctional epidermolysis bullosa, generalized intermediate	SwissProt	79402	Q13751:Q5THA1:X1WI29	NP_000219.2:NP_001017402.1:NP_001121113.1:XP_005273181.1
Core matrisome	ECM Glycoproteins	LAMB3	laminin, beta 3	6490	Junctional epidermolysis bullosa, generalized intermediate	NA	79402	Q13751:Q5THA1:X1WI29	NP_000219.2:NP_001017402.1:NP_001121113.1:XP_005273181.1
Core matrisome	ECM Glycoproteins	LAMB3	laminin, beta 3	6490	Junctional epidermolysis bullosa, generalized severe	Ensembl	79404	Q13751:Q5THA1:X1WI29	NP_000219.2:NP_001017402.1:NP_001121113.1:XP_005273181.1
Core matrisome	ECM Glycoproteins	LAMB3	laminin, beta 3	6490	Junctional epidermolysis bullosa, generalized severe	NA	79404	Q13751:Q5THA1:X1WI29	NP_000219.2:NP_001017402.1:NP_001121113.1:XP_005273181.1
Core matrisome	ECM Glycoproteins	LAMB3	laminin, beta 3	6490	Junctional epidermolysis bullosa, generalized severe	NA	79404	Q13751:Q5THA1:X1WI29	NP_000219.2:NP_001017402.1:NP_001121113.1:XP_005273181.1
Core matrisome	ECM Glycoproteins	LAMB3	laminin, beta 3	6490	Junctional epidermolysis bullosa, generalized severe	NA	79404	Q13751:Q5THA1:X1WI29	NP_000219.2:NP_001017402.1:NP_001121113.1:XP_005273181.1
Core matrisome	ECM Glycoproteins	LAMB3	laminin, beta 3	6490	Junctional epidermolysis bullosa, generalized severe	Genatlas	79404	Q13751:Q5THA1:X1WI29	NP_000219.2:NP_001017402.1:NP_001121113.1:XP_005273181.1
Core matrisome	ECM Glycoproteins	LAMB3	laminin, beta 3	6490	Junctional epidermolysis bullosa, generalized severe	HGNC	79404	Q13751:Q5THA1:X1WI29	NP_000219.2:NP_001017402.1:NP_001121113.1:XP_005273181.1
Core matrisome	ECM Glycoproteins	LAMB3	laminin, beta 3	6490	Junctional epidermolysis bullosa, generalized severe	OMIM	79404	Q13751:Q5THA1:X1WI29	NP_000219.2:NP_001017402.1:NP_001121113.1:XP_005273181.1
Core matrisome	ECM Glycoproteins	LAMB3	laminin, beta 3	6490	Junctional epidermolysis bullosa, generalized severe	Reactome	79404	Q13751:Q5THA1:X1WI29	NP_000219.2:NP_001017402.1:NP_001121113.1:XP_005273181.1
Core matrisome	ECM Glycoproteins	LAMB3	laminin, beta 3	6490	Junctional epidermolysis bullosa, generalized severe	SwissProt	79404	Q13751:Q5THA1:X1WI29	NP_000219.2:NP_001017402.1:NP_001121113.1:XP_005273181.1
Core matrisome	ECM Glycoproteins	LAMB3	laminin, beta 3	6490	Junctional epidermolysis bullosa, generalized severe	NA	79404	Q13751:Q5THA1:X1WI29	NP_000219.2:NP_001017402.1:NP_001121113.1:XP_005273181.1
Core matrisome	ECM Glycoproteins	LAMC2	laminin, gamma 2	6493	Junctional epidermolysis bullosa inversa	Ensembl	79405	Q13753	NP_005553.2:NP_061486.2
Core matrisome	ECM Glycoproteins	LAMC2	laminin, gamma 2	6493	Junctional epidermolysis bullosa inversa	NA	79405	Q13753	NP_005553.2:NP_061486.2
Core matrisome	ECM Glycoproteins	LAMC2	laminin, gamma 2	6493	Junctional epidermolysis bullosa inversa	NA	79405	Q13753	NP_005553.2:NP_061486.2
Core matrisome	ECM Glycoproteins	LAMC2	laminin, gamma 2	6493	Junctional epidermolysis bullosa inversa	NA	79405	Q13753	NP_005553.2:NP_061486.2
Core matrisome	ECM Glycoproteins	LAMC2	laminin, gamma 2	6493	Junctional epidermolysis bullosa inversa	Genatlas	79405	Q13753	NP_005553.2:NP_061486.2
Core matrisome	ECM Glycoproteins	LAMC2	laminin, gamma 2	6493	Junctional epidermolysis bullosa inversa	HGNC	79405	Q13753	NP_005553.2:NP_061486.2
Core matrisome	ECM Glycoproteins	LAMC2	laminin, gamma 2	6493	Junctional epidermolysis bullosa inversa	OMIM	79405	Q13753	NP_005553.2:NP_061486.2
Core matrisome	ECM Glycoproteins	LAMC2	laminin, gamma 2	6493	Junctional epidermolysis bullosa inversa	Reactome	79405	Q13753	NP_005553.2:NP_061486.2
Core matrisome	ECM Glycoproteins	LAMC2	laminin, gamma 2	6493	Junctional epidermolysis bullosa inversa	SwissProt	79405	Q13753	NP_005553.2:NP_061486.2
Core matrisome	ECM Glycoproteins	LAMC2	laminin, gamma 2	6493	Junctional epidermolysis bullosa inversa	NA	79405	Q13753	NP_005553.2:NP_061486.2
Core matrisome	ECM Glycoproteins	LAMC2	laminin, gamma 2	6493	Junctional epidermolysis bullosa, generalized intermediate	Ensembl	79402	Q13753	NP_005553.2:NP_061486.2
Core matrisome	ECM Glycoproteins	LAMC2	laminin, gamma 2	6493	Junctional epidermolysis bullosa, generalized intermediate	NA	79402	Q13753	NP_005553.2:NP_061486.2
Core matrisome	ECM Glycoproteins	LAMC2	laminin, gamma 2	6493	Junctional epidermolysis bullosa, generalized intermediate	NA	79402	Q13753	NP_005553.2:NP_061486.2
Core matrisome	ECM Glycoproteins	LAMC2	laminin, gamma 2	6493	Junctional epidermolysis bullosa, generalized intermediate	NA	79402	Q13753	NP_005553.2:NP_061486.2
Core matrisome	ECM Glycoproteins	LAMC2	laminin, gamma 2	6493	Junctional epidermolysis bullosa, generalized intermediate	Genatlas	79402	Q13753	NP_005553.2:NP_061486.2
Core matrisome	ECM Glycoproteins	LAMC2	laminin, gamma 2	6493	Junctional epidermolysis bullosa, generalized intermediate	HGNC	79402	Q13753	NP_005553.2:NP_061486.2
Core matrisome	ECM Glycoproteins	LAMC2	laminin, gamma 2	6493	Junctional epidermolysis bullosa, generalized intermediate	OMIM	79402	Q13753	NP_005553.2:NP_061486.2
Core matrisome	ECM Glycoproteins	LAMC2	laminin, gamma 2	6493	Junctional epidermolysis bullosa, generalized intermediate	Reactome	79402	Q13753	NP_005553.2:NP_061486.2
Core matrisome	ECM Glycoproteins	LAMC2	laminin, gamma 2	6493	Junctional epidermolysis bullosa, generalized intermediate	SwissProt	79402	Q13753	NP_005553.2:NP_061486.2
Core matrisome	ECM Glycoproteins	LAMC2	laminin, gamma 2	6493	Junctional epidermolysis bullosa, generalized intermediate	NA	79402	Q13753	NP_005553.2:NP_061486.2
Core matrisome	ECM Glycoproteins	LAMC2	laminin, gamma 2	6493	Junctional epidermolysis bullosa, generalized severe	Ensembl	79404	Q13753	NP_005553.2:NP_061486.2
Core matrisome	ECM Glycoproteins	LAMC2	laminin, gamma 2	6493	Junctional epidermolysis bullosa, generalized severe	NA	79404	Q13753	NP_005553.2:NP_061486.2
Core matrisome	ECM Glycoproteins	LAMC2	laminin, gamma 2	6493	Junctional epidermolysis bullosa, generalized severe	NA	79404	Q13753	NP_005553.2:NP_061486.2
Core matrisome	ECM Glycoproteins	LAMC2	laminin, gamma 2	6493	Junctional epidermolysis bullosa, generalized severe	NA	79404	Q13753	NP_005553.2:NP_061486.2
Core matrisome	ECM Glycoproteins	LAMC2	laminin, gamma 2	6493	Junctional epidermolysis bullosa, generalized severe	Genatlas	79404	Q13753	NP_005553.2:NP_061486.2
Core matrisome	ECM Glycoproteins	LAMC2	laminin, gamma 2	6493	Junctional epidermolysis bullosa, generalized severe	HGNC	79404	Q13753	NP_005553.2:NP_061486.2
Core matrisome	ECM Glycoproteins	LAMC2	laminin, gamma 2	6493	Junctional epidermolysis bullosa, generalized severe	OMIM	79404	Q13753	NP_005553.2:NP_061486.2
Core matrisome	ECM Glycoproteins	LAMC2	laminin, gamma 2	6493	Junctional epidermolysis bullosa, generalized severe	Reactome	79404	Q13753	NP_005553.2:NP_061486.2
Core matrisome	ECM Glycoproteins	LAMC2	laminin, gamma 2	6493	Junctional epidermolysis bullosa, generalized severe	SwissProt	79404	Q13753	NP_005553.2:NP_061486.2
Core matrisome	ECM Glycoproteins	LAMC2	laminin, gamma 2	6493	Junctional epidermolysis bullosa, generalized severe	NA	79404	Q13753	NP_005553.2:NP_061486.2
Core matrisome	ECM Glycoproteins	LAMC3	laminin, gamma 3	6494	Occipital pachygyria and polymicrogyria	Ensembl	280640	H7BY04:Q5JTC4:Q9Y6N6	NP_006050.3
Core matrisome	ECM Glycoproteins	LAMC3	laminin, gamma 3	6494	Occipital pachygyria and polymicrogyria	NA	280640	H7BY04:Q5JTC4:Q9Y6N6	NP_006050.3
Core matrisome	ECM Glycoproteins	LAMC3	laminin, gamma 3	6494	Occipital pachygyria and polymicrogyria	Genatlas	280640	H7BY04:Q5JTC4:Q9Y6N6	NP_006050.3
Core matrisome	ECM Glycoproteins	LAMC3	laminin, gamma 3	6494	Occipital pachygyria and polymicrogyria	HGNC	280640	H7BY04:Q5JTC4:Q9Y6N6	NP_006050.3
Core matrisome	ECM Glycoproteins	LAMC3	laminin, gamma 3	6494	Occipital pachygyria and polymicrogyria	OMIM	280640	H7BY04:Q5JTC4:Q9Y6N6	NP_006050.3
Core matrisome	ECM Glycoproteins	LAMC3	laminin, gamma 3	6494	Occipital pachygyria and polymicrogyria	Reactome	280640	H7BY04:Q5JTC4:Q9Y6N6	NP_006050.3
Core matrisome	ECM Glycoproteins	LAMC3	laminin, gamma 3	6494	Occipital pachygyria and polymicrogyria	SwissProt	280640	H7BY04:Q5JTC4:Q9Y6N6	NP_006050.3
Core matrisome	ECM Glycoproteins	LAMC3	laminin, gamma 3	6494	Occipital pachygyria and polymicrogyria	NA	280640	H7BY04:Q5JTC4:Q9Y6N6	NP_006050.3
Core matrisome	ECM Glycoproteins	LGI1	leucine-rich, glioma inactivated 1	6572	Autosomal dominant epilepsy with auditory features	NA	101046	O95970	NP_005088.1:XP_005270329.1
Core matrisome	ECM Glycoproteins	LGI1	leucine-rich, glioma inactivated 1	6572	Autosomal dominant epilepsy with auditory features	NA	101046	O95970	NP_005088.1:XP_005270329.1
Core matrisome	ECM Glycoproteins	LGI1	leucine-rich, glioma inactivated 1	6572	Autosomal dominant epilepsy with auditory features	NA	101046	O95970	NP_005088.1:XP_005270329.1
Core matrisome	ECM Glycoproteins	LGI1	leucine-rich, glioma inactivated 1	6572	Autosomal dominant epilepsy with auditory features	Genatlas	101046	O95970	NP_005088.1:XP_005270329.1
Core matrisome	ECM Glycoproteins	LGI1	leucine-rich, glioma inactivated 1	6572	Autosomal dominant epilepsy with auditory features	HGNC	101046	O95970	NP_005088.1:XP_005270329.1
Core matrisome	ECM Glycoproteins	LGI1	leucine-rich, glioma inactivated 1	6572	Autosomal dominant epilepsy with auditory features	OMIM	101046	O95970	NP_005088.1:XP_005270329.1
Core matrisome	ECM Glycoproteins	LGI1	leucine-rich, glioma inactivated 1	6572	Autosomal dominant epilepsy with auditory features	Reactome	101046	O95970	NP_005088.1:XP_005270329.1
Core matrisome	ECM Glycoproteins	LGI1	leucine-rich, glioma inactivated 1	6572	Autosomal dominant epilepsy with auditory features	SwissProt	101046	O95970	NP_005088.1:XP_005270329.1
Core matrisome	ECM Glycoproteins	LGI1	leucine-rich, glioma inactivated 1	6572	Autosomal dominant epilepsy with auditory features	NA	101046	O95970	NP_005088.1:XP_005270329.1
Core matrisome	ECM Glycoproteins	LGI1	leucine-rich, glioma inactivated 1	6572	Autosomal dominant epilepsy with auditory features	Ensembl	101046	O95970	NP_005088.1:XP_005270329.1
Core matrisome	ECM Glycoproteins	LGI4	leucine-rich repeat LGI family, member 4	18712	Hypomyelination neuropathy-arthrogryposis syndrome	NA	2680	A8MVC2:K7ENQ0:Q8N135	NP_644813.1
Core matrisome	ECM Glycoproteins	LGI4	leucine-rich repeat LGI family, member 4	18712	Hypomyelination neuropathy-arthrogryposis syndrome	HGNC	2680	A8MVC2:K7ENQ0:Q8N135	NP_644813.1
Core matrisome	ECM Glycoproteins	LGI4	leucine-rich repeat LGI family, member 4	18712	Hypomyelination neuropathy-arthrogryposis syndrome	Genatlas	2680	A8MVC2:K7ENQ0:Q8N135	NP_644813.1
Core matrisome	ECM Glycoproteins	LGI4	leucine-rich repeat LGI family, member 4	18712	Hypomyelination neuropathy-arthrogryposis syndrome	Reactome	2680	A8MVC2:K7ENQ0:Q8N135	NP_644813.1
Core matrisome	ECM Glycoproteins	LGI4	leucine-rich repeat LGI family, member 4	18712	Hypomyelination neuropathy-arthrogryposis syndrome	SwissProt	2680	A8MVC2:K7ENQ0:Q8N135	NP_644813.1
Core matrisome	ECM Glycoproteins	LGI4	leucine-rich repeat LGI family, member 4	18712	Hypomyelination neuropathy-arthrogryposis syndrome	OMIM	2680	A8MVC2:K7ENQ0:Q8N135	NP_644813.1
Core matrisome	ECM Glycoproteins	LGI4	leucine-rich repeat LGI family, member 4	18712	Hypomyelination neuropathy-arthrogryposis syndrome	NA	2680	A8MVC2:K7ENQ0:Q8N135	NP_644813.1
Core matrisome	ECM Glycoproteins	LGI4	leucine-rich repeat LGI family, member 4	18712	Hypomyelination neuropathy-arthrogryposis syndrome	Ensembl	2680	A8MVC2:K7ENQ0:Q8N135	NP_644813.1
Core matrisome	ECM Glycoproteins	LTBP2	latent transforming growth factor beta binding protein 2	6715	Congenital glaucoma	NA	98976	G3V254:G3V3X5:G3V511:H0YJ20:Q14767	NP_000419.1
Core matrisome	ECM Glycoproteins	LTBP2	latent transforming growth factor beta binding protein 2	6715	Congenital glaucoma	Genatlas	98976	G3V254:G3V3X5:G3V511:H0YJ20:Q14767	NP_000419.1
Core matrisome	ECM Glycoproteins	LTBP2	latent transforming growth factor beta binding protein 2	6715	Congenital glaucoma	HGNC	98976	G3V254:G3V3X5:G3V511:H0YJ20:Q14767	NP_000419.1
Core matrisome	ECM Glycoproteins	LTBP2	latent transforming growth factor beta binding protein 2	6715	Congenital glaucoma	OMIM	98976	G3V254:G3V3X5:G3V511:H0YJ20:Q14767	NP_000419.1
Core matrisome	ECM Glycoproteins	LTBP2	latent transforming growth factor beta binding protein 2	6715	Congenital glaucoma	Reactome	98976	G3V254:G3V3X5:G3V511:H0YJ20:Q14767	NP_000419.1
Core matrisome	ECM Glycoproteins	LTBP2	latent transforming growth factor beta binding protein 2	6715	Congenital glaucoma	SwissProt	98976	G3V254:G3V3X5:G3V511:H0YJ20:Q14767	NP_000419.1
Core matrisome	ECM Glycoproteins	LTBP2	latent transforming growth factor beta binding protein 2	6715	Congenital glaucoma	NA	98976	G3V254:G3V3X5:G3V511:H0YJ20:Q14767	NP_000419.1
Core matrisome	ECM Glycoproteins	LTBP2	latent transforming growth factor beta binding protein 2	6715	Congenital glaucoma	Ensembl	98976	G3V254:G3V3X5:G3V511:H0YJ20:Q14767	NP_000419.1
Core matrisome	ECM Glycoproteins	LTBP2	latent transforming growth factor beta binding protein 2	6715	Glaucoma secondary to spherophakia/ectopia lentis and megalocornea	NA	238763	G3V254:G3V3X5:G3V511:H0YJ20:Q14767	NP_000419.1
Core matrisome	ECM Glycoproteins	LTBP2	latent transforming growth factor beta binding protein 2	6715	Glaucoma secondary to spherophakia/ectopia lentis and megalocornea	Genatlas	238763	G3V254:G3V3X5:G3V511:H0YJ20:Q14767	NP_000419.1
Core matrisome	ECM Glycoproteins	LTBP2	latent transforming growth factor beta binding protein 2	6715	Glaucoma secondary to spherophakia/ectopia lentis and megalocornea	HGNC	238763	G3V254:G3V3X5:G3V511:H0YJ20:Q14767	NP_000419.1
Core matrisome	ECM Glycoproteins	LTBP2	latent transforming growth factor beta binding protein 2	6715	Glaucoma secondary to spherophakia/ectopia lentis and megalocornea	OMIM	238763	G3V254:G3V3X5:G3V511:H0YJ20:Q14767	NP_000419.1
Core matrisome	ECM Glycoproteins	LTBP2	latent transforming growth factor beta binding protein 2	6715	Glaucoma secondary to spherophakia/ectopia lentis and megalocornea	Reactome	238763	G3V254:G3V3X5:G3V511:H0YJ20:Q14767	NP_000419.1
Core matrisome	ECM Glycoproteins	LTBP2	latent transforming growth factor beta binding protein 2	6715	Glaucoma secondary to spherophakia/ectopia lentis and megalocornea	SwissProt	238763	G3V254:G3V3X5:G3V511:H0YJ20:Q14767	NP_000419.1
Core matrisome	ECM Glycoproteins	LTBP2	latent transforming growth factor beta binding protein 2	6715	Glaucoma secondary to spherophakia/ectopia lentis and megalocornea	NA	238763	G3V254:G3V3X5:G3V511:H0YJ20:Q14767	NP_000419.1
Core matrisome	ECM Glycoproteins	LTBP2	latent transforming growth factor beta binding protein 2	6715	Glaucoma secondary to spherophakia/ectopia lentis and megalocornea	Ensembl	238763	G3V254:G3V3X5:G3V511:H0YJ20:Q14767	NP_000419.1
Core matrisome	ECM Glycoproteins	LTBP2	latent transforming growth factor beta binding protein 2	6715	Weill-Marchesani syndrome	Ensembl	3449	G3V254:G3V3X5:G3V511:H0YJ20:Q14767	NP_000419.1
Core matrisome	ECM Glycoproteins	LTBP2	latent transforming growth factor beta binding protein 2	6715	Weill-Marchesani syndrome	NA	3449	G3V254:G3V3X5:G3V511:H0YJ20:Q14767	NP_000419.1
Core matrisome	ECM Glycoproteins	LTBP2	latent transforming growth factor beta binding protein 2	6715	Weill-Marchesani syndrome	Genatlas	3449	G3V254:G3V3X5:G3V511:H0YJ20:Q14767	NP_000419.1
Core matrisome	ECM Glycoproteins	LTBP2	latent transforming growth factor beta binding protein 2	6715	Weill-Marchesani syndrome	HGNC	3449	G3V254:G3V3X5:G3V511:H0YJ20:Q14767	NP_000419.1
Core matrisome	ECM Glycoproteins	LTBP2	latent transforming growth factor beta binding protein 2	6715	Weill-Marchesani syndrome	OMIM	3449	G3V254:G3V3X5:G3V511:H0YJ20:Q14767	NP_000419.1
Core matrisome	ECM Glycoproteins	LTBP2	latent transforming growth factor beta binding protein 2	6715	Weill-Marchesani syndrome	Reactome	3449	G3V254:G3V3X5:G3V511:H0YJ20:Q14767	NP_000419.1
Core matrisome	ECM Glycoproteins	LTBP2	latent transforming growth factor beta binding protein 2	6715	Weill-Marchesani syndrome	SwissProt	3449	G3V254:G3V3X5:G3V511:H0YJ20:Q14767	NP_000419.1
Core matrisome	ECM Glycoproteins	LTBP2	latent transforming growth factor beta binding protein 2	6715	Weill-Marchesani syndrome	NA	3449	G3V254:G3V3X5:G3V511:H0YJ20:Q14767	NP_000419.1
Core matrisome	ECM Glycoproteins	LTBP3	latent transforming growth factor beta binding protein 3	6716	Acromicric dysplasia	NA	969	E9PJR2:E9PKW1:E9PPT7:E9PQR0:E9PR75:E9PR84:E9PRF2:F5GWC4:H0YC99:H0YCQ2:H0YCX6:H0YE75:Q9NS15	NP_001123616.1:NP_001157738.1:NP_066548.2
Core matrisome	ECM Glycoproteins	LTBP3	latent transforming growth factor beta binding protein 3	6716	Acromicric dysplasia	Genatlas	969	E9PJR2:E9PKW1:E9PPT7:E9PQR0:E9PR75:E9PR84:E9PRF2:F5GWC4:H0YC99:H0YCQ2:H0YCX6:H0YE75:Q9NS15	NP_001123616.1:NP_001157738.1:NP_066548.2
Core matrisome	ECM Glycoproteins	LTBP3	latent transforming growth factor beta binding protein 3	6716	Acromicric dysplasia	HGNC	969	E9PJR2:E9PKW1:E9PPT7:E9PQR0:E9PR75:E9PR84:E9PRF2:F5GWC4:H0YC99:H0YCQ2:H0YCX6:H0YE75:Q9NS15	NP_001123616.1:NP_001157738.1:NP_066548.2
Core matrisome	ECM Glycoproteins	LTBP3	latent transforming growth factor beta binding protein 3	6716	Acromicric dysplasia	OMIM	969	E9PJR2:E9PKW1:E9PPT7:E9PQR0:E9PR75:E9PR84:E9PRF2:F5GWC4:H0YC99:H0YCQ2:H0YCX6:H0YE75:Q9NS15	NP_001123616.1:NP_001157738.1:NP_066548.2
Core matrisome	ECM Glycoproteins	LTBP3	latent transforming growth factor beta binding protein 3	6716	Acromicric dysplasia	Reactome	969	E9PJR2:E9PKW1:E9PPT7:E9PQR0:E9PR75:E9PR84:E9PRF2:F5GWC4:H0YC99:H0YCQ2:H0YCX6:H0YE75:Q9NS15	NP_001123616.1:NP_001157738.1:NP_066548.2
Core matrisome	ECM Glycoproteins	LTBP3	latent transforming growth factor beta binding protein 3	6716	Acromicric dysplasia	SwissProt	969	E9PJR2:E9PKW1:E9PPT7:E9PQR0:E9PR75:E9PR84:E9PRF2:F5GWC4:H0YC99:H0YCQ2:H0YCX6:H0YE75:Q9NS15	NP_001123616.1:NP_001157738.1:NP_066548.2
Core matrisome	ECM Glycoproteins	LTBP3	latent transforming growth factor beta binding protein 3	6716	Acromicric dysplasia	NA	969	E9PJR2:E9PKW1:E9PPT7:E9PQR0:E9PR75:E9PR84:E9PRF2:F5GWC4:H0YC99:H0YCQ2:H0YCX6:H0YE75:Q9NS15	NP_001123616.1:NP_001157738.1:NP_066548.2
Core matrisome	ECM Glycoproteins	LTBP3	latent transforming growth factor beta binding protein 3	6716	Acromicric dysplasia	Ensembl	969	E9PJR2:E9PKW1:E9PPT7:E9PQR0:E9PR75:E9PR84:E9PRF2:F5GWC4:H0YC99:H0YCQ2:H0YCX6:H0YE75:Q9NS15	NP_001123616.1:NP_001157738.1:NP_066548.2
Core matrisome	ECM Glycoproteins	LTBP3	latent transforming growth factor beta binding protein 3	6716	Brachyolmia-amelogenesis imperfecta syndrome	NA	2899	E9PJR2:E9PKW1:E9PPT7:E9PQR0:E9PR75:E9PR84:E9PRF2:F5GWC4:H0YC99:H0YCQ2:H0YCX6:H0YE75:Q9NS15	NP_001123616.1:NP_001157738.1:NP_066548.2
Core matrisome	ECM Glycoproteins	LTBP3	latent transforming growth factor beta binding protein 3	6716	Brachyolmia-amelogenesis imperfecta syndrome	Genatlas	2899	E9PJR2:E9PKW1:E9PPT7:E9PQR0:E9PR75:E9PR84:E9PRF2:F5GWC4:H0YC99:H0YCQ2:H0YCX6:H0YE75:Q9NS15	NP_001123616.1:NP_001157738.1:NP_066548.2
Core matrisome	ECM Glycoproteins	LTBP3	latent transforming growth factor beta binding protein 3	6716	Brachyolmia-amelogenesis imperfecta syndrome	HGNC	2899	E9PJR2:E9PKW1:E9PPT7:E9PQR0:E9PR75:E9PR84:E9PRF2:F5GWC4:H0YC99:H0YCQ2:H0YCX6:H0YE75:Q9NS15	NP_001123616.1:NP_001157738.1:NP_066548.2
Core matrisome	ECM Glycoproteins	LTBP3	latent transforming growth factor beta binding protein 3	6716	Brachyolmia-amelogenesis imperfecta syndrome	OMIM	2899	E9PJR2:E9PKW1:E9PPT7:E9PQR0:E9PR75:E9PR84:E9PRF2:F5GWC4:H0YC99:H0YCQ2:H0YCX6:H0YE75:Q9NS15	NP_001123616.1:NP_001157738.1:NP_066548.2
Core matrisome	ECM Glycoproteins	LTBP3	latent transforming growth factor beta binding protein 3	6716	Brachyolmia-amelogenesis imperfecta syndrome	Reactome	2899	E9PJR2:E9PKW1:E9PPT7:E9PQR0:E9PR75:E9PR84:E9PRF2:F5GWC4:H0YC99:H0YCQ2:H0YCX6:H0YE75:Q9NS15	NP_001123616.1:NP_001157738.1:NP_066548.2
Core matrisome	ECM Glycoproteins	LTBP3	latent transforming growth factor beta binding protein 3	6716	Brachyolmia-amelogenesis imperfecta syndrome	SwissProt	2899	E9PJR2:E9PKW1:E9PPT7:E9PQR0:E9PR75:E9PR84:E9PRF2:F5GWC4:H0YC99:H0YCQ2:H0YCX6:H0YE75:Q9NS15	NP_001123616.1:NP_001157738.1:NP_066548.2
Core matrisome	ECM Glycoproteins	LTBP3	latent transforming growth factor beta binding protein 3	6716	Brachyolmia-amelogenesis imperfecta syndrome	NA	2899	E9PJR2:E9PKW1:E9PPT7:E9PQR0:E9PR75:E9PR84:E9PRF2:F5GWC4:H0YC99:H0YCQ2:H0YCX6:H0YE75:Q9NS15	NP_001123616.1:NP_001157738.1:NP_066548.2
Core matrisome	ECM Glycoproteins	LTBP3	latent transforming growth factor beta binding protein 3	6716	Brachyolmia-amelogenesis imperfecta syndrome	Ensembl	2899	E9PJR2:E9PKW1:E9PPT7:E9PQR0:E9PR75:E9PR84:E9PRF2:F5GWC4:H0YC99:H0YCQ2:H0YCX6:H0YE75:Q9NS15	NP_001123616.1:NP_001157738.1:NP_066548.2
Core matrisome	ECM Glycoproteins	LTBP3	latent transforming growth factor beta binding protein 3	6716	Geleophysic dysplasia	NA	2623	E9PJR2:E9PKW1:E9PPT7:E9PQR0:E9PR75:E9PR84:E9PRF2:F5GWC4:H0YC99:H0YCQ2:H0YCX6:H0YE75:Q9NS15	NP_001123616.1:NP_001157738.1:NP_066548.2
Core matrisome	ECM Glycoproteins	LTBP3	latent transforming growth factor beta binding protein 3	6716	Geleophysic dysplasia	Genatlas	2623	E9PJR2:E9PKW1:E9PPT7:E9PQR0:E9PR75:E9PR84:E9PRF2:F5GWC4:H0YC99:H0YCQ2:H0YCX6:H0YE75:Q9NS15	NP_001123616.1:NP_001157738.1:NP_066548.2
Core matrisome	ECM Glycoproteins	LTBP3	latent transforming growth factor beta binding protein 3	6716	Geleophysic dysplasia	HGNC	2623	E9PJR2:E9PKW1:E9PPT7:E9PQR0:E9PR75:E9PR84:E9PRF2:F5GWC4:H0YC99:H0YCQ2:H0YCX6:H0YE75:Q9NS15	NP_001123616.1:NP_001157738.1:NP_066548.2
Core matrisome	ECM Glycoproteins	LTBP3	latent transforming growth factor beta binding protein 3	6716	Geleophysic dysplasia	OMIM	2623	E9PJR2:E9PKW1:E9PPT7:E9PQR0:E9PR75:E9PR84:E9PRF2:F5GWC4:H0YC99:H0YCQ2:H0YCX6:H0YE75:Q9NS15	NP_001123616.1:NP_001157738.1:NP_066548.2
Core matrisome	ECM Glycoproteins	LTBP3	latent transforming growth factor beta binding protein 3	6716	Geleophysic dysplasia	Reactome	2623	E9PJR2:E9PKW1:E9PPT7:E9PQR0:E9PR75:E9PR84:E9PRF2:F5GWC4:H0YC99:H0YCQ2:H0YCX6:H0YE75:Q9NS15	NP_001123616.1:NP_001157738.1:NP_066548.2
Core matrisome	ECM Glycoproteins	LTBP3	latent transforming growth factor beta binding protein 3	6716	Geleophysic dysplasia	SwissProt	2623	E9PJR2:E9PKW1:E9PPT7:E9PQR0:E9PR75:E9PR84:E9PRF2:F5GWC4:H0YC99:H0YCQ2:H0YCX6:H0YE75:Q9NS15	NP_001123616.1:NP_001157738.1:NP_066548.2
Core matrisome	ECM Glycoproteins	LTBP3	latent transforming growth factor beta binding protein 3	6716	Geleophysic dysplasia	NA	2623	E9PJR2:E9PKW1:E9PPT7:E9PQR0:E9PR75:E9PR84:E9PRF2:F5GWC4:H0YC99:H0YCQ2:H0YCX6:H0YE75:Q9NS15	NP_001123616.1:NP_001157738.1:NP_066548.2
Core matrisome	ECM Glycoproteins	LTBP3	latent transforming growth factor beta binding protein 3	6716	Geleophysic dysplasia	Ensembl	2623	E9PJR2:E9PKW1:E9PPT7:E9PQR0:E9PR75:E9PR84:E9PRF2:F5GWC4:H0YC99:H0YCQ2:H0YCX6:H0YE75:Q9NS15	NP_001123616.1:NP_001157738.1:NP_066548.2
Core matrisome	ECM Glycoproteins	LTBP4	latent transforming growth factor beta binding protein 4	6717	Cutis laxa with severe pulmonary, gastrointestinal and urinary anomalies	NA	221145	E7ENG9:E7EUU1:F5GXC9:F8WAA0:M0QXV3:M0QYE9:M0QZX0:M0R351:Q8N2S1	NP_001036009.1:NP_001036010.1:NP_003564.2
Core matrisome	ECM Glycoproteins	LTBP4	latent transforming growth factor beta binding protein 4	6717	Cutis laxa with severe pulmonary, gastrointestinal and urinary anomalies	NA	221145	E7ENG9:E7EUU1:F5GXC9:F8WAA0:M0QXV3:M0QYE9:M0QZX0:M0R351:Q8N2S1	NP_001036009.1:NP_001036010.1:NP_003564.2
Core matrisome	ECM Glycoproteins	LTBP4	latent transforming growth factor beta binding protein 4	6717	Cutis laxa with severe pulmonary, gastrointestinal and urinary anomalies	NA	221145	E7ENG9:E7EUU1:F5GXC9:F8WAA0:M0QXV3:M0QYE9:M0QZX0:M0R351:Q8N2S1	NP_001036009.1:NP_001036010.1:NP_003564.2
Core matrisome	ECM Glycoproteins	LTBP4	latent transforming growth factor beta binding protein 4	6717	Cutis laxa with severe pulmonary, gastrointestinal and urinary anomalies	NA	221145	E7ENG9:E7EUU1:F5GXC9:F8WAA0:M0QXV3:M0QYE9:M0QZX0:M0R351:Q8N2S1	NP_001036009.1:NP_001036010.1:NP_003564.2
Core matrisome	ECM Glycoproteins	LTBP4	latent transforming growth factor beta binding protein 4	6717	Cutis laxa with severe pulmonary, gastrointestinal and urinary anomalies	Genatlas	221145	E7ENG9:E7EUU1:F5GXC9:F8WAA0:M0QXV3:M0QYE9:M0QZX0:M0R351:Q8N2S1	NP_001036009.1:NP_001036010.1:NP_003564.2
Core matrisome	ECM Glycoproteins	LTBP4	latent transforming growth factor beta binding protein 4	6717	Cutis laxa with severe pulmonary, gastrointestinal and urinary anomalies	HGNC	221145	E7ENG9:E7EUU1:F5GXC9:F8WAA0:M0QXV3:M0QYE9:M0QZX0:M0R351:Q8N2S1	NP_001036009.1:NP_001036010.1:NP_003564.2
Core matrisome	ECM Glycoproteins	LTBP4	latent transforming growth factor beta binding protein 4	6717	Cutis laxa with severe pulmonary, gastrointestinal and urinary anomalies	OMIM	221145	E7ENG9:E7EUU1:F5GXC9:F8WAA0:M0QXV3:M0QYE9:M0QZX0:M0R351:Q8N2S1	NP_001036009.1:NP_001036010.1:NP_003564.2
Core matrisome	ECM Glycoproteins	LTBP4	latent transforming growth factor beta binding protein 4	6717	Cutis laxa with severe pulmonary, gastrointestinal and urinary anomalies	Reactome	221145	E7ENG9:E7EUU1:F5GXC9:F8WAA0:M0QXV3:M0QYE9:M0QZX0:M0R351:Q8N2S1	NP_001036009.1:NP_001036010.1:NP_003564.2
Core matrisome	ECM Glycoproteins	LTBP4	latent transforming growth factor beta binding protein 4	6717	Cutis laxa with severe pulmonary, gastrointestinal and urinary anomalies	SwissProt	221145	E7ENG9:E7EUU1:F5GXC9:F8WAA0:M0QXV3:M0QYE9:M0QZX0:M0R351:Q8N2S1	NP_001036009.1:NP_001036010.1:NP_003564.2
Core matrisome	ECM Glycoproteins	LTBP4	latent transforming growth factor beta binding protein 4	6717	Cutis laxa with severe pulmonary, gastrointestinal and urinary anomalies	NA	221145	E7ENG9:E7EUU1:F5GXC9:F8WAA0:M0QXV3:M0QYE9:M0QZX0:M0R351:Q8N2S1	NP_001036009.1:NP_001036010.1:NP_003564.2
Core matrisome	ECM Glycoproteins	LTBP4	latent transforming growth factor beta binding protein 4	6717	Cutis laxa with severe pulmonary, gastrointestinal and urinary anomalies	NA	221145	E7ENG9:E7EUU1:F5GXC9:F8WAA0:M0QXV3:M0QYE9:M0QZX0:M0R351:Q8N2S1	NP_001036009.1:NP_001036010.1:NP_003564.2
Core matrisome	ECM Glycoproteins	LTBP4	latent transforming growth factor beta binding protein 4	6717	Cutis laxa with severe pulmonary, gastrointestinal and urinary anomalies	NA	221145	E7ENG9:E7EUU1:F5GXC9:F8WAA0:M0QXV3:M0QYE9:M0QZX0:M0R351:Q8N2S1	NP_001036009.1:NP_001036010.1:NP_003564.2
Core matrisome	ECM Glycoproteins	LTBP4	latent transforming growth factor beta binding protein 4	6717	Cutis laxa with severe pulmonary, gastrointestinal and urinary anomalies	NA	221145	E7ENG9:E7EUU1:F5GXC9:F8WAA0:M0QXV3:M0QYE9:M0QZX0:M0R351:Q8N2S1	NP_001036009.1:NP_001036010.1:NP_003564.2
Core matrisome	ECM Glycoproteins	LTBP4	latent transforming growth factor beta binding protein 4	6717	Cutis laxa with severe pulmonary, gastrointestinal and urinary anomalies	NA	221145	E7ENG9:E7EUU1:F5GXC9:F8WAA0:M0QXV3:M0QYE9:M0QZX0:M0R351:Q8N2S1	NP_001036009.1:NP_001036010.1:NP_003564.2
Core matrisome	ECM Glycoproteins	LTBP4	latent transforming growth factor beta binding protein 4	6717	Cutis laxa with severe pulmonary, gastrointestinal and urinary anomalies	Genatlas	221145	E7ENG9:E7EUU1:F5GXC9:F8WAA0:M0QXV3:M0QYE9:M0QZX0:M0R351:Q8N2S1	NP_001036009.1:NP_001036010.1:NP_003564.2
Core matrisome	ECM Glycoproteins	LTBP4	latent transforming growth factor beta binding protein 4	6717	Cutis laxa with severe pulmonary, gastrointestinal and urinary anomalies	HGNC	221145	E7ENG9:E7EUU1:F5GXC9:F8WAA0:M0QXV3:M0QYE9:M0QZX0:M0R351:Q8N2S1	NP_001036009.1:NP_001036010.1:NP_003564.2
Core matrisome	ECM Glycoproteins	LTBP4	latent transforming growth factor beta binding protein 4	6717	Cutis laxa with severe pulmonary, gastrointestinal and urinary anomalies	OMIM	221145	E7ENG9:E7EUU1:F5GXC9:F8WAA0:M0QXV3:M0QYE9:M0QZX0:M0R351:Q8N2S1	NP_001036009.1:NP_001036010.1:NP_003564.2
Core matrisome	ECM Glycoproteins	LTBP4	latent transforming growth factor beta binding protein 4	6717	Cutis laxa with severe pulmonary, gastrointestinal and urinary anomalies	Reactome	221145	E7ENG9:E7EUU1:F5GXC9:F8WAA0:M0QXV3:M0QYE9:M0QZX0:M0R351:Q8N2S1	NP_001036009.1:NP_001036010.1:NP_003564.2
Core matrisome	ECM Glycoproteins	LTBP4	latent transforming growth factor beta binding protein 4	6717	Cutis laxa with severe pulmonary, gastrointestinal and urinary anomalies	SwissProt	221145	E7ENG9:E7EUU1:F5GXC9:F8WAA0:M0QXV3:M0QYE9:M0QZX0:M0R351:Q8N2S1	NP_001036009.1:NP_001036010.1:NP_003564.2
Core matrisome	ECM Glycoproteins	LTBP4	latent transforming growth factor beta binding protein 4	6717	Cutis laxa with severe pulmonary, gastrointestinal and urinary anomalies	NA	221145	E7ENG9:E7EUU1:F5GXC9:F8WAA0:M0QXV3:M0QYE9:M0QZX0:M0R351:Q8N2S1	NP_001036009.1:NP_001036010.1:NP_003564.2
Core matrisome	ECM Glycoproteins	LTBP4	latent transforming growth factor beta binding protein 4	6717	Cutis laxa with severe pulmonary, gastrointestinal and urinary anomalies	Ensembl	221145	E7ENG9:E7EUU1:F5GXC9:F8WAA0:M0QXV3:M0QYE9:M0QZX0:M0R351:Q8N2S1	NP_001036009.1:NP_001036010.1:NP_003564.2
Core matrisome	ECM Glycoproteins	LTBP4	latent transforming growth factor beta binding protein 4	6717	Cutis laxa with severe pulmonary, gastrointestinal and urinary anomalies	Ensembl	221145	E7ENG9:E7EUU1:F5GXC9:F8WAA0:M0QXV3:M0QYE9:M0QZX0:M0R351:Q8N2S1	NP_001036009.1:NP_001036010.1:NP_003564.2
Core matrisome	ECM Glycoproteins	LTBP4	latent transforming growth factor beta binding protein 4	6717	Duchenne muscular dystrophy	NA	98896	E7ENG9:E7EUU1:F5GXC9:F8WAA0:M0QXV3:M0QYE9:M0QZX0:M0R351:Q8N2S1	NP_001036009.1:NP_001036010.1:NP_003564.2
Core matrisome	ECM Glycoproteins	LTBP4	latent transforming growth factor beta binding protein 4	6717	Duchenne muscular dystrophy	NA	98896	E7ENG9:E7EUU1:F5GXC9:F8WAA0:M0QXV3:M0QYE9:M0QZX0:M0R351:Q8N2S1	NP_001036009.1:NP_001036010.1:NP_003564.2
Core matrisome	ECM Glycoproteins	LTBP4	latent transforming growth factor beta binding protein 4	6717	Duchenne muscular dystrophy	NA	98896	E7ENG9:E7EUU1:F5GXC9:F8WAA0:M0QXV3:M0QYE9:M0QZX0:M0R351:Q8N2S1	NP_001036009.1:NP_001036010.1:NP_003564.2
Core matrisome	ECM Glycoproteins	LTBP4	latent transforming growth factor beta binding protein 4	6717	Duchenne muscular dystrophy	NA	98896	E7ENG9:E7EUU1:F5GXC9:F8WAA0:M0QXV3:M0QYE9:M0QZX0:M0R351:Q8N2S1	NP_001036009.1:NP_001036010.1:NP_003564.2
Core matrisome	ECM Glycoproteins	LTBP4	latent transforming growth factor beta binding protein 4	6717	Duchenne muscular dystrophy	Genatlas	98896	E7ENG9:E7EUU1:F5GXC9:F8WAA0:M0QXV3:M0QYE9:M0QZX0:M0R351:Q8N2S1	NP_001036009.1:NP_001036010.1:NP_003564.2
Core matrisome	ECM Glycoproteins	LTBP4	latent transforming growth factor beta binding protein 4	6717	Duchenne muscular dystrophy	HGNC	98896	E7ENG9:E7EUU1:F5GXC9:F8WAA0:M0QXV3:M0QYE9:M0QZX0:M0R351:Q8N2S1	NP_001036009.1:NP_001036010.1:NP_003564.2
Core matrisome	ECM Glycoproteins	LTBP4	latent transforming growth factor beta binding protein 4	6717	Duchenne muscular dystrophy	OMIM	98896	E7ENG9:E7EUU1:F5GXC9:F8WAA0:M0QXV3:M0QYE9:M0QZX0:M0R351:Q8N2S1	NP_001036009.1:NP_001036010.1:NP_003564.2
Core matrisome	ECM Glycoproteins	LTBP4	latent transforming growth factor beta binding protein 4	6717	Duchenne muscular dystrophy	Reactome	98896	E7ENG9:E7EUU1:F5GXC9:F8WAA0:M0QXV3:M0QYE9:M0QZX0:M0R351:Q8N2S1	NP_001036009.1:NP_001036010.1:NP_003564.2
Core matrisome	ECM Glycoproteins	LTBP4	latent transforming growth factor beta binding protein 4	6717	Duchenne muscular dystrophy	SwissProt	98896	E7ENG9:E7EUU1:F5GXC9:F8WAA0:M0QXV3:M0QYE9:M0QZX0:M0R351:Q8N2S1	NP_001036009.1:NP_001036010.1:NP_003564.2
Core matrisome	ECM Glycoproteins	LTBP4	latent transforming growth factor beta binding protein 4	6717	Duchenne muscular dystrophy	NA	98896	E7ENG9:E7EUU1:F5GXC9:F8WAA0:M0QXV3:M0QYE9:M0QZX0:M0R351:Q8N2S1	NP_001036009.1:NP_001036010.1:NP_003564.2
Core matrisome	ECM Glycoproteins	LTBP4	latent transforming growth factor beta binding protein 4	6717	Duchenne muscular dystrophy	Ensembl	98896	E7ENG9:E7EUU1:F5GXC9:F8WAA0:M0QXV3:M0QYE9:M0QZX0:M0R351:Q8N2S1	NP_001036009.1:NP_001036010.1:NP_003564.2
Core matrisome	ECM Glycoproteins	MATN3	matrilin 3	6909	Multiple epiphyseal dysplasia type 5	Ensembl	93311	O15232	NP_002372.1
Core matrisome	ECM Glycoproteins	MATN3	matrilin 3	6909	Multiple epiphyseal dysplasia type 5	NA	93311	O15232	NP_002372.1
Core matrisome	ECM Glycoproteins	MATN3	matrilin 3	6909	Multiple epiphyseal dysplasia type 5	NA	93311	O15232	NP_002372.1
Core matrisome	ECM Glycoproteins	MATN3	matrilin 3	6909	Multiple epiphyseal dysplasia type 5	SwissProt	93311	O15232	NP_002372.1
Core matrisome	ECM Glycoproteins	MATN3	matrilin 3	6909	Multiple epiphyseal dysplasia type 5	Genatlas	93311	O15232	NP_002372.1
Core matrisome	ECM Glycoproteins	MATN3	matrilin 3	6909	Multiple epiphyseal dysplasia type 5	HGNC	93311	O15232	NP_002372.1
Core matrisome	ECM Glycoproteins	MATN3	matrilin 3	6909	Multiple epiphyseal dysplasia type 5	OMIM	93311	O15232	NP_002372.1
Core matrisome	ECM Glycoproteins	MATN3	matrilin 3	6909	Multiple epiphyseal dysplasia type 5	Reactome	93311	O15232	NP_002372.1
Core matrisome	ECM Glycoproteins	MATN3	matrilin 3	6909	Multiple epiphyseal dysplasia type 5	NA	93311	O15232	NP_002372.1
Core matrisome	ECM Glycoproteins	MATN3	matrilin 3	6909	Spondyloepimetaphyseal dysplasia, matrilin-3 type	Ensembl	156728	O15232	NP_002372.1
Core matrisome	ECM Glycoproteins	MATN3	matrilin 3	6909	Spondyloepimetaphyseal dysplasia, matrilin-3 type	NA	156728	O15232	NP_002372.1
Core matrisome	ECM Glycoproteins	MATN3	matrilin 3	6909	Spondyloepimetaphyseal dysplasia, matrilin-3 type	NA	156728	O15232	NP_002372.1
Core matrisome	ECM Glycoproteins	MATN3	matrilin 3	6909	Spondyloepimetaphyseal dysplasia, matrilin-3 type	SwissProt	156728	O15232	NP_002372.1
Core matrisome	ECM Glycoproteins	MATN3	matrilin 3	6909	Spondyloepimetaphyseal dysplasia, matrilin-3 type	Genatlas	156728	O15232	NP_002372.1
Core matrisome	ECM Glycoproteins	MATN3	matrilin 3	6909	Spondyloepimetaphyseal dysplasia, matrilin-3 type	HGNC	156728	O15232	NP_002372.1
Core matrisome	ECM Glycoproteins	MATN3	matrilin 3	6909	Spondyloepimetaphyseal dysplasia, matrilin-3 type	OMIM	156728	O15232	NP_002372.1
Core matrisome	ECM Glycoproteins	MATN3	matrilin 3	6909	Spondyloepimetaphyseal dysplasia, matrilin-3 type	Reactome	156728	O15232	NP_002372.1
Core matrisome	ECM Glycoproteins	MATN3	matrilin 3	6909	Spondyloepimetaphyseal dysplasia, matrilin-3 type	NA	156728	O15232	NP_002372.1
Core matrisome	ECM Glycoproteins	MFAP5	microfibrillar associated protein 5	29673	Familial thoracic aortic aneurysm and aortic dissection	NA	91387	B3KW70:F5GYX4:F5H1C0:F5H2W4:F5H413:F5H7Z2:H0YG03:H0YGS3:Q13361:Q7Z490	NP_003471.1:XP_005253542.1
Core matrisome	ECM Glycoproteins	MFAP5	microfibrillar associated protein 5	29673	Familial thoracic aortic aneurysm and aortic dissection	NA	91387	B3KW70:F5GYX4:F5H1C0:F5H2W4:F5H413:F5H7Z2:H0YG03:H0YGS3:Q13361:Q7Z490	NP_003471.1:XP_005253542.1
Core matrisome	ECM Glycoproteins	MFAP5	microfibrillar associated protein 5	29673	Familial thoracic aortic aneurysm and aortic dissection	NA	91387	B3KW70:F5GYX4:F5H1C0:F5H2W4:F5H413:F5H7Z2:H0YG03:H0YGS3:Q13361:Q7Z490	NP_003471.1:XP_005253542.1
Core matrisome	ECM Glycoproteins	MFAP5	microfibrillar associated protein 5	29673	Familial thoracic aortic aneurysm and aortic dissection	Genatlas	91387	B3KW70:F5GYX4:F5H1C0:F5H2W4:F5H413:F5H7Z2:H0YG03:H0YGS3:Q13361:Q7Z490	NP_003471.1:XP_005253542.1
Core matrisome	ECM Glycoproteins	MFAP5	microfibrillar associated protein 5	29673	Familial thoracic aortic aneurysm and aortic dissection	HGNC	91387	B3KW70:F5GYX4:F5H1C0:F5H2W4:F5H413:F5H7Z2:H0YG03:H0YGS3:Q13361:Q7Z490	NP_003471.1:XP_005253542.1
Core matrisome	ECM Glycoproteins	MFAP5	microfibrillar associated protein 5	29673	Familial thoracic aortic aneurysm and aortic dissection	OMIM	91387	B3KW70:F5GYX4:F5H1C0:F5H2W4:F5H413:F5H7Z2:H0YG03:H0YGS3:Q13361:Q7Z490	NP_003471.1:XP_005253542.1
Core matrisome	ECM Glycoproteins	MFAP5	microfibrillar associated protein 5	29673	Familial thoracic aortic aneurysm and aortic dissection	Reactome	91387	B3KW70:F5GYX4:F5H1C0:F5H2W4:F5H413:F5H7Z2:H0YG03:H0YGS3:Q13361:Q7Z490	NP_003471.1:XP_005253542.1
Core matrisome	ECM Glycoproteins	MFAP5	microfibrillar associated protein 5	29673	Familial thoracic aortic aneurysm and aortic dissection	SwissProt	91387	B3KW70:F5GYX4:F5H1C0:F5H2W4:F5H413:F5H7Z2:H0YG03:H0YGS3:Q13361:Q7Z490	NP_003471.1:XP_005253542.1
Core matrisome	ECM Glycoproteins	MFAP5	microfibrillar associated protein 5	29673	Familial thoracic aortic aneurysm and aortic dissection	NA	91387	B3KW70:F5GYX4:F5H1C0:F5H2W4:F5H413:F5H7Z2:H0YG03:H0YGS3:Q13361:Q7Z490	NP_003471.1:XP_005253542.1
Core matrisome	ECM Glycoproteins	MFAP5	microfibrillar associated protein 5	29673	Familial thoracic aortic aneurysm and aortic dissection	Ensembl	91387	B3KW70:F5GYX4:F5H1C0:F5H2W4:F5H413:F5H7Z2:H0YG03:H0YGS3:Q13361:Q7Z490	NP_003471.1:XP_005253542.1
Core matrisome	ECM Glycoproteins	MGP	matrix Gla protein	7060	Keutel syndrome	Ensembl	85202	H0YGZ6:P08493	NP_000891.2:NP_001177768.1
Core matrisome	ECM Glycoproteins	MGP	matrix Gla protein	7060	Keutel syndrome	NA	85202	H0YGZ6:P08493	NP_000891.2:NP_001177768.1
Core matrisome	ECM Glycoproteins	MGP	matrix Gla protein	7060	Keutel syndrome	Genatlas	85202	H0YGZ6:P08493	NP_000891.2:NP_001177768.1
Core matrisome	ECM Glycoproteins	MGP	matrix Gla protein	7060	Keutel syndrome	HGNC	85202	H0YGZ6:P08493	NP_000891.2:NP_001177768.1
Core matrisome	ECM Glycoproteins	MGP	matrix Gla protein	7060	Keutel syndrome	OMIM	85202	H0YGZ6:P08493	NP_000891.2:NP_001177768.1
Core matrisome	ECM Glycoproteins	MGP	matrix Gla protein	7060	Keutel syndrome	SwissProt	85202	H0YGZ6:P08493	NP_000891.2:NP_001177768.1
Core matrisome	ECM Glycoproteins	MGP	matrix Gla protein	7060	Keutel syndrome	NA	85202	H0YGZ6:P08493	NP_000891.2:NP_001177768.1
Core matrisome	ECM Glycoproteins	NTN1	netrin 1	8029	Familial congenital mirror movements	NA	238722	H7BZF4:O95631	NP_004813.2:XP_006721658.1
Core matrisome	ECM Glycoproteins	NTN1	netrin 1	8029	Familial congenital mirror movements	NA	238722	H7BZF4:O95631	NP_004813.2:XP_006721658.1
Core matrisome	ECM Glycoproteins	NTN1	netrin 1	8029	Familial congenital mirror movements	Genatlas	238722	H7BZF4:O95631	NP_004813.2:XP_006721658.1
Core matrisome	ECM Glycoproteins	NTN1	netrin 1	8029	Familial congenital mirror movements	Reactome	238722	H7BZF4:O95631	NP_004813.2:XP_006721658.1
Core matrisome	ECM Glycoproteins	NTN1	netrin 1	8029	Familial congenital mirror movements	HGNC	238722	H7BZF4:O95631	NP_004813.2:XP_006721658.1
Core matrisome	ECM Glycoproteins	NTN1	netrin 1	8029	Familial congenital mirror movements	OMIM	238722	H7BZF4:O95631	NP_004813.2:XP_006721658.1
Core matrisome	ECM Glycoproteins	NTN1	netrin 1	8029	Familial congenital mirror movements	SwissProt	238722	H7BZF4:O95631	NP_004813.2:XP_006721658.1
Core matrisome	ECM Glycoproteins	NTN1	netrin 1	8029	Familial congenital mirror movements	NA	238722	H7BZF4:O95631	NP_004813.2:XP_006721658.1
Core matrisome	ECM Glycoproteins	NTN1	netrin 1	8029	Familial congenital mirror movements	Ensembl	238722	H7BZF4:O95631	NP_004813.2:XP_006721658.1
Core matrisome	ECM Glycoproteins	NTNG1	netrin G1	23319	Atypical Rett syndrome	NA	3095	A6NK56:B4DKF0:F5GYT0:F8WEB5:Q9Y2I2	NP_001106697.1:NP_001106699.1:NP_055732.2:XP_006710519.1
Core matrisome	ECM Glycoproteins	NTNG1	netrin G1	23319	Atypical Rett syndrome	NA	3095	A6NK56:B4DKF0:F5GYT0:F8WEB5:Q9Y2I2	NP_001106697.1:NP_001106699.1:NP_055732.2:XP_006710519.1
Core matrisome	ECM Glycoproteins	NTNG1	netrin G1	23319	Atypical Rett syndrome	NA	3095	A6NK56:B4DKF0:F5GYT0:F8WEB5:Q9Y2I2	NP_001106697.1:NP_001106699.1:NP_055732.2:XP_006710519.1
Core matrisome	ECM Glycoproteins	NTNG1	netrin G1	23319	Atypical Rett syndrome	NA	3095	A6NK56:B4DKF0:F5GYT0:F8WEB5:Q9Y2I2	NP_001106697.1:NP_001106699.1:NP_055732.2:XP_006710519.1
Core matrisome	ECM Glycoproteins	NTNG1	netrin G1	23319	Atypical Rett syndrome	Reactome	3095	A6NK56:B4DKF0:F5GYT0:F8WEB5:Q9Y2I2	NP_001106697.1:NP_001106699.1:NP_055732.2:XP_006710519.1
Core matrisome	ECM Glycoproteins	NTNG1	netrin G1	23319	Atypical Rett syndrome	Genatlas	3095	A6NK56:B4DKF0:F5GYT0:F8WEB5:Q9Y2I2	NP_001106697.1:NP_001106699.1:NP_055732.2:XP_006710519.1
Core matrisome	ECM Glycoproteins	NTNG1	netrin G1	23319	Atypical Rett syndrome	HGNC	3095	A6NK56:B4DKF0:F5GYT0:F8WEB5:Q9Y2I2	NP_001106697.1:NP_001106699.1:NP_055732.2:XP_006710519.1
Core matrisome	ECM Glycoproteins	NTNG1	netrin G1	23319	Atypical Rett syndrome	OMIM	3095	A6NK56:B4DKF0:F5GYT0:F8WEB5:Q9Y2I2	NP_001106697.1:NP_001106699.1:NP_055732.2:XP_006710519.1
Core matrisome	ECM Glycoproteins	NTNG1	netrin G1	23319	Atypical Rett syndrome	SwissProt	3095	A6NK56:B4DKF0:F5GYT0:F8WEB5:Q9Y2I2	NP_001106697.1:NP_001106699.1:NP_055732.2:XP_006710519.1
Core matrisome	ECM Glycoproteins	NTNG1	netrin G1	23319	Atypical Rett syndrome	NA	3095	A6NK56:B4DKF0:F5GYT0:F8WEB5:Q9Y2I2	NP_001106697.1:NP_001106699.1:NP_055732.2:XP_006710519.1
Core matrisome	ECM Glycoproteins	NTNG1	netrin G1	23319	Atypical Rett syndrome	Ensembl	3095	A6NK56:B4DKF0:F5GYT0:F8WEB5:Q9Y2I2	NP_001106697.1:NP_001106699.1:NP_055732.2:XP_006710519.1
Core matrisome	ECM Glycoproteins	OTOG	otogelin	8516	Autosomal recessive non-syndromic sensorineural deafness type DFNB	NA	90636	C9IZ84:H9KVB3:Q6ZRI0	NP_001264198.1
Core matrisome	ECM Glycoproteins	OTOG	otogelin	8516	Autosomal recessive non-syndromic sensorineural deafness type DFNB	NA	90636	C9IZ84:H9KVB3:Q6ZRI0	NP_001264198.1
Core matrisome	ECM Glycoproteins	OTOG	otogelin	8516	Autosomal recessive non-syndromic sensorineural deafness type DFNB	NA	90636	C9IZ84:H9KVB3:Q6ZRI0	NP_001264198.1
Core matrisome	ECM Glycoproteins	OTOG	otogelin	8516	Autosomal recessive non-syndromic sensorineural deafness type DFNB	Genatlas	90636	C9IZ84:H9KVB3:Q6ZRI0	NP_001264198.1
Core matrisome	ECM Glycoproteins	OTOG	otogelin	8516	Autosomal recessive non-syndromic sensorineural deafness type DFNB	HGNC	90636	C9IZ84:H9KVB3:Q6ZRI0	NP_001264198.1
Core matrisome	ECM Glycoproteins	OTOG	otogelin	8516	Autosomal recessive non-syndromic sensorineural deafness type DFNB	OMIM	90636	C9IZ84:H9KVB3:Q6ZRI0	NP_001264198.1
Core matrisome	ECM Glycoproteins	OTOG	otogelin	8516	Autosomal recessive non-syndromic sensorineural deafness type DFNB	SwissProt	90636	C9IZ84:H9KVB3:Q6ZRI0	NP_001264198.1
Core matrisome	ECM Glycoproteins	OTOG	otogelin	8516	Autosomal recessive non-syndromic sensorineural deafness type DFNB	NA	90636	C9IZ84:H9KVB3:Q6ZRI0	NP_001264198.1
Core matrisome	ECM Glycoproteins	OTOG	otogelin	8516	Autosomal recessive non-syndromic sensorineural deafness type DFNB	Ensembl	90636	C9IZ84:H9KVB3:Q6ZRI0	NP_001264198.1
Core matrisome	ECM Glycoproteins	PXDN	peroxidasin homolog (Drosophila)	14966	Congenital cataract microcornea with corneal opacity	NA	289499	C9J4I9:H7C1W1:H7C300:H7C3W2:Q92626	NP_036425.1
Core matrisome	ECM Glycoproteins	PXDN	peroxidasin homolog (Drosophila)	14966	Congenital cataract microcornea with corneal opacity	NA	289499	C9J4I9:H7C1W1:H7C300:H7C3W2:Q92626	NP_036425.1
Core matrisome	ECM Glycoproteins	PXDN	peroxidasin homolog (Drosophila)	14966	Congenital cataract microcornea with corneal opacity	NA	289499	C9J4I9:H7C1W1:H7C300:H7C3W2:Q92626	NP_036425.1
[truncated: 3,983 more rows]
